# Supplementary material for: The Proteome Profile of Olfactory Ecto-Mesenchymal Stem Cells-Derived from Patients with Familial Alzheimer’s Disease Reveals New Insights for AD Study
Source: Int J Mol Sci. 2023 Aug 9;24(16):12606. doi: 10.3390/ijms241612606 (PMC10454072; doi:10.3390/ijms241612606)
Supplement: Supplementary file 1 [file ijms-24-12606-s001.zip]

Archive with 7 entries (7 files):
- supplementary figures.pdf
- Table S1. Measurements by Mass spectrometry P1-C1 (symptomatic).xlsx
- Table S2. Diferentially expressed proteins (P1-C1).xlsx
- Table S3. WEBGESTALT analysis (P1-C1) GO, pathways and diseases.xlsx
- Table S4. Measurements by Mass spectrometry P2-C2 (presymptomatic).xlsx
- Table S5. Diferentially expressed proteins (P2-C2).xlsx
- Table S6. WEBGESTALT Analysis (P2-C2), GO, pathways and diseases.xlsx
