# Supplementary material for: The Proteome Profile of Olfactory Ecto-Mesenchymal Stem Cells-Derived from Patients with Familial Alzheimer’s Disease Reveals New Insights for AD Study
Source: Int J Mol Sci. 2023 Aug 9;24(16):12606. doi: 10.3390/ijms241612606 (PMC10454072; doi:10.3390/ijms241612606)
Supplement: Supplementary file 1 [file ijms-24-12606-s001.zip › Table S1. Measurements by Mass spectrometry P1-C1 (symptomatic).xlsx]

## Sheet: TOTAL PROTEINS
TOTAL OF PROTEINS DETECTED						4750
TOTAL INJECTIONS (3 CONTROL-C1(CM55), 3 SYMPTOMATIC CARRIER-P1 (PM54)						6
TOTAL PEPTIDES						27081
PEPTIDES PER PROTEIN (AVERAGE)						5.70847
Accession	Peptide count	Unique peptides	Confidence score	Anova (p)	q Value	Max fold change	Power	Highest mean condition	Lowest mean condition	Mass	Description	CONTROL			PSEN1 (A431E) SYMPTOMATIC CARRIER
												20190314_UDMSE_CM55_001	20190314_UDMSE_CM55_002	20190314_UDMSE_CM55_003	20190314_UDMSE_PM54_001	20190314_UDMSE_PM54_002	20190314_UDMSE_PM54_003
O60282;A0A0G2JMZ6;O60282-2	18	1	87.6995	5.91528e-09	1.78842e-06	Infinity	1	PM54	CM55	110065	Kinesin heavy chain isoform 5C OS=Homo sapiens OX=9606 GN=KIF5C PE=1 SV=1	0	0	0	436.932	406.58	463.574
REVERSE16863	6	1	35.3425	9.15287e-09	1.78842e-06	Infinity	1	PM54	CM55	226983	Reversed Sequence 16863	0	0	0	742.326	732.591	644.007
P26447	9	5	35.7362	2.42296e-08	3.15623e-06	7.00416	1	CM55	PM54	11956.7	Protein S100-A4 OS=Homo sapiens OX=9606 GN=S100A4 PE=1 SV=1	6706.47	6750	6542.9	945.724	935.183	974.449
Q8IV33	7	1	31.7226	7.00821e-08	6.84684e-06	Infinity	1	PM54	CM55	149845	Uncharacterized protein KIAA0825 OS=Homo sapiens OX=9606 GN=KIAA0825 PE=2 SV=3	0	0	0	168.575	186.089	208.636
P42224;P42224-2;J3KPM9;D2KFR9;E7EPD2;E7ENM1;E9PH66;H7BZB5;H7BZ88	33	23	220.074	1.04302e-07	8.0264e-06	3.22052	1	CM55	PM54	87905.2	Signal transducer and activator of transcription 1-alpha/beta OS=Homo sapiens OX=9606 GN=STAT1 PE=1 SV=2	12712.4	13199.6	13079.1	4088.79	3988.13	4030.15
O14607;A0A087X0Y2;A0A096LPD8;F5GWV3;F5H3N7;F5H8B4;O14607-3;O14607-4;A0A087X248;A0A087X2I9;O14607-2;O14607-5;A6NCS7	7	1	26.5007	1.23234e-07	8.0264e-06	Infinity	1	PM54	CM55	151658	Histone demethylase UTY OS=Homo sapiens OX=9606 GN=UTY PE=1 SV=2	0	0	0	349.607	395.592	461.052
P17050	3	1	13.7542	1.82254e-07	1.01747e-05	5.38088	1	PM54	CM55	47078	Alpha-N-acetylgalactosaminidase OS=Homo sapiens OX=9606 GN=NAGA PE=1 SV=2	1661.17	1714.53	1661.62	8759.22	8978.98	9366.99
P16401	5	2	15.1741	3.42035e-07	1.6708e-05	Infinity	1	PM54	CM55	22580.2	Histone H1.5 OS=Homo sapiens OX=9606 GN=HIST1H1B PE=1 SV=3	0	0	0	253.757	338.73	344.794
Q5JPF3;Q5JPF3-2;E9PJI0;A0A0C4DGX0;A0A0C4DH05;A0A087WYV7;Q5JPF3-3	17	1	97.7256	4.84214e-07	2.10251e-05	Infinity	1	PM54	CM55	201516	Ankyrin repeat domain-containing protein 36C OS=Homo sapiens OX=9606 GN=ANKRD36C PE=1 SV=3	0	0	0	92.0613	68.5007	80.9393
A0A087WTA8;P08123	15	11	98.8937	5.78967e-07	2.26254e-05	2.67792	1	CM55	PM54	129664	Collagen alpha-2(I) chain OS=Homo sapiens OX=9606 GN=COL1A2 PE=1 SV=1	3001.97	2866.27	2970.67	1078.15	1115.1	1107.41
P27797;K7EJB9;K7EL50	23	20	162.87	7.4066e-07	2.44711e-05	2.73801	1	CM55	PM54	48312.7	Calreticulin OS=Homo sapiens OX=9606 GN=CALR PE=1 SV=1	37907.9	38209.6	39748.9	13806	14125.7	14386
A0A0A0MTC8;Q9NQ36;Q9NQ36-2;Q9NQ36-3	1	1	4.4132	7.99617e-07	2.44711e-05	Infinity	1	PM54	CM55	111376	Signal peptide_ CUB and EGF-like domain-containing protein 2 OS=Homo sapiens OX=9606 GN=SCUBE2 PE=1 SV=1	0	0	0	78.3305	108.556	102.353
REVERSE5705	19	1	80.2276	8.14055e-07	2.44711e-05	Infinity	1	PM54	CM55	379760	Reversed Sequence 5705	0	0	0	253.02	307.762	388.005
P02751;P02751-15;P02751-17;P02751-3;P02751-7;P02751-10;P02751-11;P02751-13;P02751-14;P02751-6;P02751-8;P02751-9;P02751-5;P02751-12;P02751-4;H0Y7Z1;P02751-16;P02751-2;H0Y4K8	58	39	380.989	1.1978e-06	3.168e-05	3.29398	1	CM55	PM54	266218	Fibronectin OS=Homo sapiens OX=9606 GN=FN1 PE=1 SV=4	14178.6	14101.9	13645.1	4217.56	4417.48	4092.92
P00338;P00338-3;P00338-4;P00338-2;P00338-5;F5GXY2;F5GYU2;F5GXH2;F5H5J4;F5H6W8;F5GZQ4;A0A087WUM2;F5GWW2;F5GXC7;F5GXU1;F5H8H6;Q6ZMR3;F5H155;F5H245;F5H5G7;G3XAP5;P07864	68	40	336.027	1.216e-06	3.168e-05	1.29827	1	CM55	PM54	36973.9	L-lactate dehydrogenase A chain OS=Homo sapiens OX=9606 GN=LDHA PE=1 SV=2	31180.9	30688.4	30951.1	23811.3	23715.4	23968.4
P15121;E9PCX2;E9PEF9;Q5T621;V9GYG2;V9GYP9	8	5	53.0456	1.52017e-06	3.71292e-05	6.27027	1	CM55	PM54	36252.6	Aldose reductase OS=Homo sapiens OX=9606 GN=AKR1B1 PE=1 SV=3	1798.21	1624.34	1733.32	261.333	288.4	272.538
P07996;P07996-2;A8MZG1	15	10	73.3646	1.74069e-06	4.00142e-05	2.00278	1	CM55	PM54	133375	Thrombospondin-1 OS=Homo sapiens OX=9606 GN=THBS1 PE=1 SV=2	2449.53	2570.15	2531.06	1260.22	1238.52	1271.38
P68871;A0A2R8Y7R2;F8W6P5	15	11	48.6836	1.99406e-06	4.32922e-05	189.485	1	CM55	PM54	16112.5	Hemoglobin subunit beta OS=Homo sapiens OX=9606 GN=HBB PE=1 SV=2	6590.72	6512.12	6093.54	41.5087	27.0273	32.7724
P31946;P31946-2;A0A0J9YWE8;Q4VY19;Q4VY20;A0A0J9YWZ2	14	7	118.334	2.30815e-06	4.54993e-05	2.99081	1	CM55	PM54	28196.5	14-3-3 protein beta/alpha OS=Homo sapiens OX=9606 GN=YWHAB PE=1 SV=3	4088.46	4029.08	4377.1	1419.58	1377.97	1380.13
REVERSE19275	5	1	19.7267	2.43637e-06	4.54993e-05	37.0092	1	CM55	PM54	312546	Reversed Sequence 19275	6269.36	5960.7	6815.89	152.948	161.303	200.377
P46779-3;H0YKD8;H0YLP6;H0YMF4;P46779;P46779-2;P46779-4;P46779-5	4	1	27.5689	2.51211e-06	4.54993e-05	1173.93	1	PM54	CM55	19490.5	Isoform 3 of 60S ribosomal protein L28 OS=Homo sapiens OX=9606 GN=RPL28	0	0.285682	0	95.0359	107.746	132.589
P08670;B0YJC4;B0YJC5;A0A1B0GTT5;A0A1B0GVG8;A0A1W2PQU7;F8W835;Q16352;Q9HCD6;D6RG15;P07196;Q9HCD6-2;U3KPR1	192	107	880.195	2.56144e-06	4.54993e-05	1.49523	1	CM55	PM54	53708.8	Vimentin OS=Homo sapiens OX=9606 GN=VIM PE=1 SV=4	138365	138910	138848	94217.3	93092.3	90990.2
H7BZJ3	7	4	37.9104	2.71715e-06	4.58311e-05	2.01487	1	CM55	PM54	13747.4	Protein disulfide-isomerase A3 (Fragment) OS=Homo sapiens OX=9606 GN=PDIA3 PE=1 SV=1	8334.29	8033.64	8339.3	3993.73	4085.8	4182.93
Q5SZK8;Q5SZK8-2	21	2	86.7743	2.81467e-06	4.58311e-05	5.48383	1	CM55	PM54	352811	FRAS1-related extracellular matrix protein 2 OS=Homo sapiens OX=9606 GN=FREM2 PE=1 SV=2	2930.01	3085.66	2829.5	509.233	576.316	527.406
A0A2R8Y7C0;P69905;G3V1N2	3	3	19.1436	3.04135e-06	4.75411e-05	27.5877	1	CM55	PM54	13842.7	Hemoglobin subunit alpha (Fragment) OS=Homo sapiens OX=9606 GN=HBA2 PE=1 SV=1	1679.2	1460.65	1519.95	61.9547	58.9932	47.9608
O14879	5	3	30.1867	3.5614e-06	5.35291e-05	11.1623	1	CM55	PM54	56726.2	Interferon-induced protein with tetratricopeptide repeats 3 OS=Homo sapiens OX=9606 GN=IFIT3 PE=1 SV=1	3158.33	3009.8	2873.32	298.444	241.354	270.203
P27816	22	1	145.018	3.98457e-06	5.76714e-05	2.16256	1	CM55	PM54	121518	Microtubule-associated protein 4 OS=Homo sapiens OX=9606 GN=MAP4 PE=1 SV=3	1510.38	1464.51	1402.69	668.011	677.506	678.744
P20591;F8W8T1;P20591-2;H9KVC7;H9KVC9;P20592-2;C9JEL4;H9KVC4;H9KVD0;C9JS04;C9JZQ9	19	11	140.755	4.18603e-06	5.84235e-05	37.1341	1	CM55	PM54	75919.6	Interferon-induced GTP-binding protein Mx1 OS=Homo sapiens OX=9606 GN=MX1 PE=1 SV=4	4023.47	4392.81	4591	115.856	97.6224	136.8
P28838;P28838-2;H0Y9Q1;H0Y983	13	3	82.108	4.41797e-06	5.87092e-05	5.7965	1	CM55	PM54	56565.6	Cytosol aminopeptidase OS=Homo sapiens OX=9606 GN=LAP3 PE=1 SV=3	879.603	850.961	793.52	134.548	145.473	155.429
REVERSE8893	8	3	36.2777	4.51433e-06	5.87092e-05	1.76657	1	CM55	PM54	117209	Reversed Sequence 8893	2972.76	3120.6	3037.44	1704.36	1709.77	1754.53
O15460;O15460-2;E7ENX0;E7EPI9;E7ERI1;A8MXE0;C9JX45;C9JCP0;C9JIG4;C9JN43	15	13	87.7898	4.6572e-06	5.87092e-05	1.64465	1	CM55	PM54	61301.2	Prolyl 4-hydroxylase subunit alpha-2 OS=Homo sapiens OX=9606 GN=P4HA2 PE=1 SV=1	3915.39	3791.57	3834.94	2310.79	2314.12	2392.95
O00264	3	2	17.3574	4.96508e-06	6.06344e-05	2.1419	1	CM55	PM54	21785.2	Membrane-associated progesterone receptor component 1 OS=Homo sapiens OX=9606 GN=PGRMC1 PE=1 SV=3	4975.05	4876.31	4854.27	2361.2	2194.21	2310.27
O14654	4	1	19.6731	6.36996e-06	7.27912e-05	1.85671	1	PM54	CM55	134794	Insulin receptor substrate 4 OS=Homo sapiens OX=9606 GN=IRS4 PE=1 SV=1	229.182	244.027	239.28	444.375	443.924	434.589
P10599;P10599-2	9	9	61.3227	6.67659e-06	7.27912e-05	2.02707	1	CM55	PM54	12022.7	Thioredoxin OS=Homo sapiens OX=9606 GN=TXN PE=1 SV=3	12334	12670.9	12072.7	6210.67	5876.67	6203.93
P02768;A0A087WWT3;A0A0C4DGB6;B7WNR0;C9JKR2;D6RHD5;H0YA55;P02768-2;P02768-3	10	5	49.7877	6.71262e-06	7.27912e-05	3.93192	1	CM55	PM54	71362.7	Serum albumin OS=Homo sapiens OX=9606 GN=ALB PE=1 SV=2	3424.51	3710.63	3514.9	952.359	838.395	917.856
P63010;P63010-2;P63010-3;A0A087X253;A0A087WU93;A0A087WZQ6;A0A087WYD1;K7EN71;K7ERB2	15	2	85.7615	6.71274e-06	7.27912e-05	1.52418	1	CM55	PM54	105465	AP-2 complex subunit beta OS=Homo sapiens OX=9606 GN=AP2B1 PE=1 SV=1	1773.48	1776.15	1733.03	1171.27	1164.81	1129.84
Q15084;Q15084-2;Q15084-3;Q15084-4;Q15084-5	8	5	51.1466	6.89188e-06	7.27912e-05	1.91062	1	CM55	PM54	48520.6	Protein disulfide-isomerase A6 OS=Homo sapiens OX=9606 GN=PDIA6 PE=1 SV=1	9277.97	8824.37	8774.32	4588.85	4701.37	4776.77
E7EVC7;Q676U5;Q676U5-2	1	1	4.061	7.31842e-06	7.52622e-05	5.95004	1	CM55	PM54	70695.3	Autophagy-related protein 16-1 OS=Homo sapiens OX=9606 GN=ATG16L1 PE=1 SV=1	1232.94	1175.14	1144.01	183.717	192.421	220.849
REVERSE22053	5	1	25.536	7.95466e-06	7.82667e-05	2.47693	1	PM54	CM55	133193	Reversed Sequence 22053	2694.12	2577.02	2803.54	6835.24	6421.72	6743.48
Q9Y4L1;A0A087X054;A0A087WWI4;E9PJ21;K7EQK2;Q9Y4L1-2;J3KTF1;J3QL06;J3QLE9;J3QQH7;Q9BST8	14	6	86.4811	8.13836e-06	7.82667e-05	1.73756	1	CM55	PM54	111564	Hypoxia up-regulated protein 1 OS=Homo sapiens OX=9606 GN=HYOU1 PE=1 SV=1	1166.35	1122.06	1101.58	648.191	660.88	641.933
P60033;A6NMH8;E9PIF1;E9PJK1;E9PRJ8;H0YDJ9;H0YDL9;E9PM31;H0YEE2	3	3	19.2363	8.21141e-06	7.82667e-05	1.76987	1	CM55	PM54	26493.8	CD81 antigen OS=Homo sapiens OX=9606 GN=CD81 PE=1 SV=1	2743.14	2788.11	2756.98	1525.97	1536.55	1620.45
P23381;P23381-2;G3V3H8;G3V3Y5;G3V277;G3V423;G3V456;G3V5U1;H0YJP3	9	5	56.231	8.78487e-06	8.17389e-05	1.93282	1	CM55	PM54	53507.7	Tryptophan--tRNA ligase_ cytoplasmic OS=Homo sapiens OX=9606 GN=WARS PE=1 SV=2	2532.04	2730.75	2622.84	1377.97	1357.09	1344.81
P29401;P29401-2;A0A0B4J1R6;E9PFF2;F8W888	10	7	79.8973	1.02179e-05	9.28613e-05	1.64032	1	CM55	PM54	68562.1	Transketolase OS=Homo sapiens OX=9606 GN=TKT PE=1 SV=3	4561.63	4565.66	4741.49	2762.52	2884.45	2807.97
Q9HCM1;J3KPI3	9	1	40.1266	1.04921e-05	9.31866e-05	52.0463	1	CM55	PM54	196682	Uncharacterized protein KIAA1551 OS=Homo sapiens OX=9606 GN=KIAA1551 PE=1 SV=3	670.269	615.712	602.942	12.7185	14.5372	9.03739
REVERSE19734	10	1	48.2001	1.14438e-05	9.938e-05	1.63856	1	CM55	PM54	171299	Reversed Sequence 19734	16770.4	17084.8	16488.5	9992.29	10201.1	10531
P26232;P26232-2;P26232-3;P26232-5;A0A0A0MRI5;A0A0A0MTJ6;P26232-4;P26232-6	8	1	45.1315	1.19165e-05	0.000101236	1.60837	1	CM55	PM54	106112	Catenin alpha-2 OS=Homo sapiens OX=9606 GN=CTNNA2 PE=1 SV=5	960.156	957.737	949.312	583.983	583.422	615.27
Q96PY5;Q96PY5-3;C9IZY8	3	2	15.9284	1.28847e-05	0.000106494	2.0702	1	CM55	PM54	123777	Formin-like protein 2 OS=Homo sapiens OX=9606 GN=FMNL2 PE=1 SV=3	1405.04	1504.52	1444.43	715.834	713.49	673.855
P00558;P00558-2	35	20	210.036	1.30804e-05	0.000106494	1.9377	1	CM55	PM54	45014	Phosphoglycerate kinase 1 OS=Homo sapiens OX=9606 GN=PGK1 PE=1 SV=3	25776.4	25418.4	26170.8	12930.8	13042.2	13953.5
P52209;P52209-2;K7EM49;K7EMN2;K7EPF6	6	5	35.4032	1.37255e-05	0.000106692	2.22914	1	CM55	PM54	53653.3	6-phosphogluconate dehydrogenase_ decarboxylating OS=Homo sapiens OX=9606 GN=PGD PE=1 SV=3	2357.45	2187.86	2352.3	1025.32	1068.79	1000.18
P09972;A8MVZ9;C9J8F3;J3KSV6;J3QKP5;K7EKH5;J3QKK1	9	2	53.7835	1.38175e-05	0.000106692	1.69244	1	CM55	PM54	39855.1	Fructose-bisphosphate aldolase C OS=Homo sapiens OX=9606 GN=ALDOC PE=1 SV=2	2466.84	2435.89	2560.9	1442.55	1456.82	1510.6
Q9UKY1	3	1	16.9679	1.39867e-05	0.000106692	1.94548	1	CM55	PM54	98553.9	Zinc fingers and homeoboxes protein 1 OS=Homo sapiens OX=9606 GN=ZHX1 PE=1 SV=1	2101.19	2034.31	1932.65	1042.02	1055.11	1021.98
O75923;O75923-10;O75923-11;O75923-12;O75923-13;O75923-14;O75923-2;O75923-3;O75923-4;O75923-5;O75923-6;O75923-7;O75923-8;O75923-9;O75923-15	15	2	78.9448	1.44533e-05	0.000106692	9.06898	1	CM55	PM54	239405	Dysferlin OS=Homo sapiens OX=9606 GN=DYSF PE=1 SV=1	522.67	453.931	515.797	58.1161	59.4386	47.006
Q96FQ6	4	3	23.7571	1.44698e-05	0.000106692	9.26163	1	PM54	CM55	11858.4	Protein S100-A16 OS=Homo sapiens OX=9606 GN=S100A16 PE=1 SV=1	39.8355	31.682	29.8652	307.802	317.01	314.157
O75976;O75976-2	3	1	8.1534	1.48088e-05	0.000106949	1.81264	1	CM55	PM54	154015	Carboxypeptidase D OS=Homo sapiens OX=9606 GN=CPD PE=1 SV=2	2279.25	2192.64	2211.64	1228.79	1185.51	1272.88
P14618-2;H3BTN5;H3BR70	31	1	371.113	1.51451e-05	0.000106949	1.44676	1	CM55	PM54	58575.5	Isoform M1 of Pyruvate kinase PKM OS=Homo sapiens OX=9606 GN=PKM	95.6774	94.5608	91.5185	65.0798	64.1312	65.5388
Q15149;Q15149-2;Q15149-4;Q15149-5;Q15149-6;Q15149-7;Q15149-8;Q15149-9;E9PMV1;H0YDN1;E9PKG0;E9PIA2;E9PQ28	167	24	1080.95	1.54062e-05	0.000106949	1.64526	1	PM54	CM55	533787	Plectin OS=Homo sapiens OX=9606 GN=PLEC PE=1 SV=3	933.429	901.601	934.079	1476.43	1561.69	1517.8
REVERSE5873	13	1	60.9326	1.55995e-05	0.000106949	Infinity	1	PM54	CM55	182822	Reversed Sequence 5873	0	0	0	70.4207	136.84	132.83
P00441;H7BYH4	4	3	28.7674	1.60235e-05	0.000107963	1.52496	1	CM55	PM54	16163.9	Superoxide dismutase [Cu-Zn] OS=Homo sapiens OX=9606 GN=SOD1 PE=1 SV=2	8580.06	8574.04	8826.07	5668.3	5544.6	5823.69
P02452;I3L3H7	20	12	126.703	1.63134e-05	0.000108053	2.02109	1	CM55	PM54	139968	Collagen alpha-1(I) chain OS=Homo sapiens OX=9606 GN=COL1A1 PE=1 SV=5	7126.62	6853.64	6779.81	3508.45	3503.9	3259.36
REVERSE33209	6	1	24.028	1.70845e-05	0.000111097	Infinity	1	CM55	PM54	157541	Reversed Sequence 33209	99.1925	219.368	176.374	0	0	0
Q5VTE0;P68104;A0A087WVQ9;P68104-2;A0A087WV01;A0A2U3TZH3;Q05639;A0A2R8Y488;A0A2R8Y660;A6PW80;Q5JR01;A0A2R8YDN5	50	36	235.024	1.78353e-05	0.000111097	1.3756	1	CM55	PM54	50527.3	Putative elongation factor 1-alpha-like 3 OS=Homo sapiens OX=9606 GN=EEF1A1P5 PE=5 SV=1	50938.4	52081.8	52531	37118.4	38363.5	37597
P18085;C9JPM4;C9JAK5;F8WDB3;C9J6P1;F5H1V1;F5H6T5;U3KQF2	14	9	86.8259	1.78877e-05	0.000111097	1.35408	1	CM55	PM54	20624.9	ADP-ribosylation factor 4 OS=Homo sapiens OX=9606 GN=ARF4 PE=1 SV=3	7650.85	7483.49	7463.13	5592.57	5456.57	5639.23
P18669;P15259	15	7	127.257	1.81988e-05	0.000111097	1.72962	1	CM55	PM54	28918	Phosphoglycerate mutase 1 OS=Homo sapiens OX=9606 GN=PGAM1 PE=1 SV=2	9068.85	9620.59	9698.3	5378.11	5538.92	5495.66
P60228;E5RGA2;H0YBR5	2	2	4.718	1.83532e-05	0.000111097	2.20266	1	CM55	PM54	52620.1	Eukaryotic translation initiation factor 3 subunit E OS=Homo sapiens OX=9606 GN=EIF3E PE=1 SV=1	5376.41	5489.65	5067.05	2341.44	2521.04	2371.11
A0A0A0MRG9;Q96SN8;Q96SN8-2;Q96SN8-3;Q96SN8-4;F8WCI3;B1AMJ5;F8WF55;F8WBJ0	5	1	27.8316	1.86799e-05	0.000111097	Infinity	1	PM54	CM55	190946	CDK5 regulatory subunit-associated protein 2 OS=Homo sapiens OX=9606 GN=CDK5RAP2 PE=1 SV=1	0	0	0	131.644	62.8218	80.3712
Q96D15;M0QYB8;M0QZH0	5	5	29.0228	1.94028e-05	0.000111097	1.95566	1	CM55	PM54	37493	Reticulocalbin-3 OS=Homo sapiens OX=9606 GN=RCN3 PE=1 SV=1	3435.35	3385.97	3558.28	1786.51	1687.67	1833.29
E9PJL7;E9PR44;E9PRA8;P02511;A0A024R3B9;E9PNH7;E9PS12	3	2	22.7407	1.94506e-05	0.000111097	2.39668	1	PM54	CM55	15348.4	Alpha-crystallin B chain (Fragment) OS=Homo sapiens OX=9606 GN=CRYAB PE=1 SV=8	1937.84	2005.26	2159.01	4865.43	4717.56	5041.84
P06744;A0A0A0MTS2;A0A2U3TZU2;P06744-2;K7EQ48;A0A0J9YX90;A0A0J9YXP8;A0A0J9YYH3;A0A2R8Y6C7;K7EPY4;K7ENA0;K7EP41;K7ERC6;A0A0J9YXH9;A0A0J9YXM3;A0A0J9YYI8;A0A2R8YF08;K7EIL4;K7ELR7;K7ERK8	13	8	91.0001	1.95224e-05	0.000111097	1.40441	1	CM55	PM54	63375.4	Glucose-6-phosphate isomerase OS=Homo sapiens OX=9606 GN=GPI PE=1 SV=4	6045.62	5904.23	5885.26	4324.06	4222.53	4152.76
P14618;P14618-3;B4DNK4;H3BQ34;H3BTJ2;H3BUW1;H3BT25;H3BU13;H3BN34;H3BQZ3;P30613-2	89	49	389.991	1.98752e-05	0.000111097	1.59181	1	CM55	PM54	58507.3	Pyruvate kinase PKM OS=Homo sapiens OX=9606 GN=PKM PE=1 SV=4	70453.2	71440.9	73946.7	44002.7	45525.9	46066.3
P14314;K7ELL7;P14314-2;A0A0C4DGP4;K7EJ70;K7EKX1;K7EPW7	11	9	61.8248	1.99003e-05	0.000111097	1.85119	1	CM55	PM54	60395	Glucosidase 2 subunit beta OS=Homo sapiens OX=9606 GN=PRKCSH PE=1 SV=2	3301.81	3249.72	3136.66	1774.72	1670.44	1788.35
Q9Y6K5;F8VS35;F8VWK9	4	3	21.6171	2.02238e-05	0.000111313	13.5268	1	CM55	PM54	122938	2'-5'-oligoadenylate synthase 3 OS=Homo sapiens OX=9606 GN=OAS3 PE=1 SV=3	302.034	401.897	386.505	30.5797	24.7945	25.2389
REVERSE32037	8	4	35.1324	2.08039e-05	0.000112916	3.15279	1	CM55	PM54	131625	Reversed Sequence 32037	906.735	878.864	819.003	254.12	284.029	287.977
P14625;A0A1W2PRR1;Q96GW1;H0YIV0;F8W026	48	26	302.686	2.17311e-05	0.00011491	1.71653	1	CM55	PM54	92754.2	Endoplasmin OS=Homo sapiens OX=9606 GN=HSP90B1 PE=1 SV=1	10407.8	10965.8	10805.9	6338.25	6029.42	6379.12
Q4AC94;Q4AC94-1;Q4AC94-3;Q4AC94-4;Q4AC94-2	18	4	70.8359	2.18956e-05	0.00011491	2.11293	1	CM55	PM54	262784	C2 domain-containing protein 3 OS=Homo sapiens OX=9606 GN=C2CD3 PE=1 SV=4	7156.57	7391.43	6831.36	3220.14	3416.76	3481.45
Q06323;Q06323-2;Q06323-3;H0YKK6;H0YLU2	6	1	44.0294	2.25773e-05	0.00011491	1.66836	1	CM55	PM54	28894.2	Proteasome activator complex subunit 1 OS=Homo sapiens OX=9606 GN=PSME1 PE=1 SV=1	6730.63	7024.6	6590.24	3996.23	4165.63	4033.02
Q96AY3;H0Y827;K7ELI6;K7ESG6;Q96AY3-2;K7EM43;C9JPC3	19	13	103.743	2.28255e-05	0.00011491	1.78463	1	CM55	PM54	64758.4	Peptidyl-prolyl cis-trans isomerase FKBP10 OS=Homo sapiens OX=9606 GN=FKBP10 PE=1 SV=1	7679.36	7613.48	7707.58	4088.99	4454.84	4344.25
P16152;A8MTM1;E9PQ63;P16152-2	7	5	39.368	2.32208e-05	0.00011491	2.64155	1	CM55	PM54	30660.1	Carbonyl reductase [NADPH] 1 OS=Homo sapiens OX=9606 GN=CBR1 PE=1 SV=3	1378.46	1424	1509.65	508.929	552.911	570.574
P05120;H7BYS2;H7C004;E7EPJ9;E7ERB5;E9PDK7	7	5	46.2431	2.32654e-05	0.00011491	58.935	1	CM55	PM54	46881.5	Plasminogen activator inhibitor 2 OS=Homo sapiens OX=9606 GN=SERPINB2 PE=1 SV=2	1777.78	1934.27	2075.19	26.7401	26.3075	45.1493
P06396;A0A0A0MS51;A0A0A0MT01;P06396-2;P06396-3;P06396-4;A0A0U1RQL8;Q5T0I0	17	12	100.773	2.34952e-05	0.00011491	1.60012	1	CM55	PM54	86096.8	Gelsolin OS=Homo sapiens OX=9606 GN=GSN PE=1 SV=1	10800.7	10517.8	10148.9	6617.4	6632.28	6415.91
Q13557;D6R938;E9PBG7;E9PF82;Q13557-10;Q13557-11;Q13557-12;Q13557-3;Q13557-4;Q13557-5;Q13557-6;Q13557-8;Q13557-9;H0Y9J2;H0Y9C2;A0A2Q3DQE3;Q13555-10;Q13555-11;Q13555-2;Q13555-3;Q13555-5;Q13555-7;Q13555-8;Q13555-9;Q5SWX3;Q8WU40;Q9UQM7;Q9UQM7-2;D6RHX9;E7EQE4;H0Y6G2	9	3	57.8008	2.38082e-05	0.00011491	2.25088	1	PM54	CM55	56996.8	Calcium/calmodulin-dependent protein kinase type II subunit delta OS=Homo sapiens OX=9606 GN=CAMK2D PE=1 SV=3	584.255	587.145	528.24	1299.72	1277.65	1248.32
Q8N944;C9J4B8;C9JS07	6	1	25.4656	2.39004e-05	0.00011491	1.4199	1	CM55	PM54	91699.4	APC membrane recruitment protein 3 OS=Homo sapiens OX=9606 GN=AMER3 PE=1 SV=2	3584.74	3566.45	3452.25	2502.44	2439.53	2525.76
P21333;P21333-2;Q60FE5;A0A087WWY3;F8WE98;H0Y5C6;H0Y5F3;H7C2E7	174	132	1195.6	2.42022e-05	0.00011491	1.29208	1	CM55	PM54	283477	Filamin-A OS=Homo sapiens OX=9606 GN=FLNA PE=1 SV=4	36519.7	36047	35519.2	27658.1	28347.3	27647.4
O43379;O43379-4;A0A2R8YD43;H7C3R4;O43379-2;O43379-3	6	1	29.1022	2.44059e-05	0.00011491	Infinity	1	PM54	CM55	168121	WD repeat-containing protein 62 OS=Homo sapiens OX=9606 GN=WDR62 PE=1 SV=4	0	0	0	143.918	95.4666	231.662
P13674;P13674-2;P13674-3	12	8	76.536	2.56906e-05	0.000118249	1.99715	1	CM55	PM54	61334.5	Prolyl 4-hydroxylase subunit alpha-1 OS=Homo sapiens OX=9606 GN=P4HA1 PE=1 SV=2	4356.18	4539.19	4341.42	2316.47	2210.25	2101.13
J3KTL2;Q07955;Q07955-2;Q07955-3;J3KSR8	3	1	17.0911	2.57202e-05	0.000118249	2.1665	1	CM55	PM54	28443.3	Serine/arginine-rich-splicing factor 1 OS=Homo sapiens OX=9606 GN=SRSF1 PE=1 SV=1	1986.18	2096.02	1855.93	912.287	911.62	916.979
REVERSE28887	3	2	11.5868	2.66244e-05	0.000120983	1.92022	1	CM55	PM54	105485	Reversed Sequence 28887	923.438	941.969	874.907	456.606	483.354	487.124
P04899;P04899-4;P04899-2;P04899-3;P04899-5;P04899-6;P08754;A8MTJ3;P19087;A0A087WZE5;A0A1W2PP38	12	4	82.6338	2.78496e-05	0.000125096	1.90245	1	CM55	PM54	41021.3	Guanine nucleotide-binding protein G(i) subunit alpha-2 OS=Homo sapiens OX=9606 GN=GNAI2 PE=1 SV=3	3310.99	3206.55	3231.43	1658.04	1659.91	1806.48
Q9P2E9;Q9P2E9-3;A0A087WVV2;F8W7S5;A0A087WU26;A2A2S5	26	13	166.557	2.84603e-05	0.000125691	1.4076	1	CM55	PM54	152856	Ribosome-binding protein 1 OS=Homo sapiens OX=9606 GN=RRBP1 PE=1 SV=5	2789.54	2850.39	2798.05	2053.61	1986.21	1954.76
P0DMV8;A0A0G2JIW1;P0DMV9;P0DMV8-2;V9GZ37	20	7	121.365	2.86255e-05	0.000125691	1.78392	1	CM55	PM54	70337.5	Heat shock 70 kDa protein 1A OS=Homo sapiens OX=9606 GN=HSPA1A PE=1 SV=1	2323.71	2210.41	2342.66	1262.09	1337.18	1255.59
O43707;O43707-2;F5GXS2;O43707-3;H7C144;K7EJH8;K7EP19	81	37	527.105	2.995e-05	0.000130046	1.44748	1	CM55	PM54	105310	Alpha-actinin-4 OS=Homo sapiens OX=9606 GN=ACTN4 PE=1 SV=2	18799.8	18054.7	18331.6	12380.7	12882.7	12862.3
Q8IWJ2;B8ZZW2	7	1	36.8517	3.12055e-05	0.000134009	242.881	1	CM55	PM54	196993	GRIP and coiled-coil domain-containing protein 2 OS=Homo sapiens OX=9606 GN=GCC2 PE=1 SV=4	14200.7	13068.8	12448.9	30.2333	66.4587	66.8383
REVERSE28341	20	1	93.2851	3.20928e-05	0.000134323	2.62268	1	PM54	CM55	224746	Reversed Sequence 28341	216.79	227.853	241.053	559.127	627.636	611.603
P07737;K7EJ44;I3L3D5	23	16	136.31	3.22697e-05	0.000134323	1.39847	1	CM55	PM54	15225.3	Profilin-1 OS=Homo sapiens OX=9606 GN=PFN1 PE=1 SV=2	35166.1	34124.5	33922.8	24326.1	24294.1	25184.1
A6NHL2;A6NHL2-2	8	1	58.9312	3.23098e-05	0.000134323	3.12523	1	PM54	CM55	50707.2	Tubulin alpha chain-like 3 OS=Homo sapiens OX=9606 GN=TUBAL3 PE=1 SV=2	36.2932	31.0226	32.551	97.9283	107.332	106.846
P06733;A0A2R8Y6G6;P06733-2;K7EM90;A0A2R8YEM5;A0A2R8Y879;K7ERS8;A0A2R8Y798;A0A2R8YEG5;A0A2R8Y6I8;F5H1C3;U3KQP4	47	32	285.515	3.40064e-05	0.000139491	1.31815	1	CM55	PM54	47511.2	Alpha-enolase OS=Homo sapiens OX=9606 GN=ENO1 PE=1 SV=2	46166.9	44750.6	44262.8	33871.2	34242.4	34439.1
P35606;P35606-2;D6R997;D6RBG7;D6RBT6;D6RBZ7;D6RCL6;H0YAC7;H0Y938	15	4	84.6732	3.42668e-05	0.000139491	1.42492	1	CM55	PM54	103343	Coatomer subunit beta' OS=Homo sapiens OX=9606 GN=COPB2 PE=1 SV=2	2633.43	2549.73	2492.33	1771.73	1802.68	1812.18
Q04446;E9PGM4	6	3	33.6478	3.53513e-05	0.00014088	1.15787	1	CM55	PM54	80930.3	1_4-alpha-glucan-branching enzyme OS=Homo sapiens OX=9606 GN=GBE1 PE=1 SV=3	10643.7	10740.5	10629.8	9247.18	9101.27	9300.65
Q16851;A0A087WYS1;E7EUC7;Q16851-2;C9JNZ1;C9JQU9;C9JVG3;C9JWG0;C9JUW1;C9JTZ5;C9J6Q0	11	6	73.9613	3.54024e-05	0.00014088	1.73275	1	CM55	PM54	57111.4	UTP--glucose-1-phosphate uridylyltransferase OS=Homo sapiens OX=9606 GN=UGP2 PE=1 SV=5	2002.22	1921.05	1896.16	1136.66	1071.97	1149.85
H0Y8G5;H0YA96;Q14103;Q14103-2;Q14103-3;Q14103-4;D6RAF8;D6RF44;D6RBQ9;D6RD83	8	4	56.5653	3.56897e-05	0.00014088	1.43301	1	CM55	PM54	29838.4	Heterogeneous nuclear ribonucleoprotein D0 (Fragment) OS=Homo sapiens OX=9606 GN=HNRNPD PE=1 SV=8	3236.86	3159.2	3114.92	2260.44	2155.49	2221.12
Q8TEP8;A0A0A0MR42;H0Y966;K7ENP4;Q8TEP8-1;K7ELX0;Q8TEP8-2;H0Y9P3;K7ERF9	17	2	76.5002	3.71987e-05	0.000145369	19.1761	1	CM55	PM54	281792	Centrosomal protein of 192 kDa OS=Homo sapiens OX=9606 GN=CEP192 PE=1 SV=3	1175.92	1142.56	913.824	68.2639	44.2548	56.0407
Q8NEM0;Q8NEM0-2;Q8NEM0-3	7	1	29.2434	3.85463e-05	0.000147912	Infinity	1	PM54	CM55	94332	Microcephalin OS=Homo sapiens OX=9606 GN=MCPH1 PE=1 SV=4	0	0	0	58.3198	132.69	127.547
REVERSE27354	3	2	15.9838	3.86066e-05	0.000147912	1.88409	1	PM54	CM55	129421	Reversed Sequence 27354	1173.93	1199.97	1247.07	2202.4	2223.39	2396.44
REVERSE16206	17	2	92.8621	4.02928e-05	0.000151461	1.48692	1	CM55	PM54	77801.1	Reversed Sequence 16206	520.38	503.465	537.045	354.912	349.551	345.282
P11277;P11277-2;P11277-3;H0YJE6	19	1	89.0628	4.09306e-05	0.000151461	1.7316	1	CM55	PM54	247324	Spectrin beta chain_ erythrocytic OS=Homo sapiens OX=9606 GN=SPTB PE=1 SV=5	1901.95	2032.73	2038.77	1184.69	1146.76	1118.22
F8WBW8;Q9P281	5	2	26.2373	4.09759e-05	0.000151461	2.35923	1	CM55	PM54	279699	BAH and coiled-coil domain-containing protein 1 OS=Homo sapiens OX=9606 GN=BAHCC1 PE=1 SV=2	1577.53	1620.32	1458.52	694.908	653.838	624.936
F5H365;Q15436;Q15436-2;G3V1W4;G3V2R6;G3V3G5;G3V4V1;G3V4Q2;G3V5X8;G3V5K1	14	4	88.6173	4.1374e-05	0.000151461	1.22405	1	CM55	PM54	83881.8	Protein transport protein SEC23 OS=Homo sapiens OX=9606 GN=SEC23A PE=1 SV=1	1036.92	1064.74	1035.24	861.158	855.175	846.396
P35968;P35968-2;P35968-3	7	1	38.0812	4.14708e-05	0.000151461	9.74547	1	CM55	PM54	153409	Vascular endothelial growth factor receptor 2 OS=Homo sapiens OX=9606 GN=KDR PE=1 SV=2	457.814	337.597	358.064	40.1991	34.3845	43.7764
E9PBS1;P22234;D6RF62;P22234-2	7	4	40.7675	4.21949e-05	0.00015236	1.78587	1	CM55	PM54	46335.9	Multifunctional protein ADE2 (Fragment) OS=Homo sapiens OX=9606 GN=PAICS PE=1 SV=1	1297.45	1293.28	1326.06	691.466	763.066	738.679
REVERSE6402	4	2	16.6373	4.28002e-05	0.00015236	1.86919	1	CM55	PM54	532843	Reversed Sequence 6402	2488.81	2528.96	2721.34	1404.75	1402.6	1333.01
P21817;P21817-3;P21817-2;M0R014;A0A1B0GVS2;M0R127	30	5	119.474	4.28865e-05	0.00015236	1.86206	1	PM54	CM55	570879	Ryanodine receptor 1 OS=Homo sapiens OX=9606 GN=RYR1 PE=1 SV=3	631.008	634.701	646.748	1123.5	1185.12	1252.48
Q00610;A0A087WVQ6;Q00610-2;J3KS13;J3KSQ2;K7EJJ5;J3QL20	59	31	388.116	4.39176e-05	0.000154322	1.31158	1	CM55	PM54	193383	Clathrin heavy chain 1 OS=Homo sapiens OX=9606 GN=CLTC PE=1 SV=5	7408.21	7689.81	7724.49	5855.48	5756.82	5788.44
Q13523;H0YDJ3	2	2	7.8227	4.42286e-05	0.000154322	25.8506	1	PM54	CM55	117329	Serine/threonine-protein kinase PRP4 homolog OS=Homo sapiens OX=9606 GN=PRPF4B PE=1 SV=3	22.5687	24.8244	14.3514	553.566	500.395	542.176
REVERSE7188	3	1	15.4011	4.71977e-05	0.000163225	1.81947	1	PM54	CM55	93761.4	Reversed Sequence 7188	375.469	358.993	386.654	701.679	688.872	649.279
P35268;K7EMH1;K7ERI7;K7EKS7;K7ELC4;K7EP65;K7EJT5	9	7	43.7041	4.78988e-05	0.000164196	1.32377	1	PM54	CM55	14844	60S ribosomal protein L22 OS=Homo sapiens OX=9606 GN=RPL22 PE=1 SV=2	1210.52	1223.97	1191.82	1605.95	1632.32	1562.12
REVERSE5878	2	1	12.0918	5.05681e-05	0.000171742	2.07078	1	CM55	PM54	134368	Reversed Sequence 5878	7147.32	7148.44	6712.07	3608.68	3240.46	3295.74
P50454;E9PPV6;E9PR70;E9PK86;E9PKH2;E9PMI5;E9PNX1;E9PIG2;E9PJH8;E9PRS3;E9PQ34;E9PLA6;H0YEP8	25	17	193.878	5.09791e-05	0.000171742	1.46159	1	CM55	PM54	46554.7	Serpin H1 OS=Homo sapiens OX=9606 GN=SERPINH1 PE=1 SV=2	15170.2	15252	15270.9	10491.4	10022.5	10748.9
P51571;A6NLM8	3	3	19.8958	5.21932e-05	0.00017433	1.49145	1	CM55	PM54	19169.7	Translocon-associated protein subunit delta OS=Homo sapiens OX=9606 GN=SSR4 PE=1 SV=1	1756.13	1685.43	1676.57	1112.73	1176.77	1142.14
P50995;P50995-2;H0Y6E1	13	3	66.2782	5.40087e-05	0.000178865	1.74262	1	CM55	PM54	54732	Annexin A11 OS=Homo sapiens OX=9606 GN=ANXA11 PE=1 SV=1	1771.37	1755.32	1637.06	974.888	1022.59	965.736
P11021;O95399;O95399-2;Q5H8X8	47	30	236.287	5.48488e-05	0.00018012	1.69494	1	CM55	PM54	72447.1	Endoplasmic reticulum chaperone BiP OS=Homo sapiens OX=9606 GN=HSPA5 PE=1 SV=2	26384	24344.2	24483.4	14438	15116.3	14819.9
P07237;H7BZ94;H0Y3Z3;I3L312;I3L398;I3NI03;I3L0S0;I3L4M2;I3L3U6;I3L3P5;I3L514;I3L1Y5	46	33	291.45	5.57423e-05	0.000181529	1.5771	1	CM55	PM54	57515.6	Protein disulfide-isomerase OS=Homo sapiens OX=9606 GN=P4HB PE=1 SV=3	20739.7	22382	20836.3	13629.2	13380.7	13544.2
REVERSE19722	4	1	26.7501	5.66296e-05	0.000182895	3.72168	1	CM55	PM54	59123.6	Reversed Sequence 19722	586.142	622.853	581.422	180.793	158.467	141.817
P0DP23;H0Y7A7;P0DP24;P0DP25;E7EMB3;E7ETZ0;Q96HY3;G3V361;M0QZ52;F8WBR5;G3V479;G3V226	15	11	107.984	5.82276e-05	0.000185452	1.44039	1	CM55	PM54	16837.7	Calmodulin-1 OS=Homo sapiens OX=9606 GN=CALM1 PE=1 SV=1	24324.5	24064.1	23350.7	17108.1	16528.4	16169
Q16222;Q16222-3;Q16222-2	7	4	40.3029	5.84787e-05	0.000185452	3.0181	1	PM54	CM55	59168.3	UDP-N-acetylhexosamine pyrophosphorylase OS=Homo sapiens OX=9606 GN=UAP1 PE=1 SV=3	482.097	446.532	549.693	1493.49	1519.21	1449.03
Q99439;B4DDF4;B4DUT8;A0A087X271;A0A087X1X5;H3BVI6;Q99439-2;K7ES69;H3BQH0;A0A087WV51;U3KPS3	13	9	114.005	5.88452e-05	0.000185452	1.38608	1	CM55	PM54	34096.3	Calponin-2 OS=Homo sapiens OX=9606 GN=CNN2 PE=1 SV=4	7670.76	7363.09	7255.98	5367.93	5428.3	5285
Q9BUF5;K7ESM5;K7EL29;K7EN98;K7ES63;K7EJ64;K7EJZ4;K7EPE5;K7EQT3;K7ERA8;K7ESQ3	51	30	216.498	5.95958e-05	0.000185763	1.11931	1	PM54	CM55	50313.5	Tubulin beta-6 chain OS=Homo sapiens OX=9606 GN=TUBB6 PE=1 SV=1	7884.36	7785.62	7742.36	8737.28	8785.69	8682.79
Q15283	3	1	12.3231	5.98944e-05	0.000185763	14.264	1	CM55	PM54	97982.9	Ras GTPase-activating protein 2 OS=Homo sapiens OX=9606 GN=RASA2 PE=1 SV=3	1338.73	1349.72	1351.09	120.312	71.2039	91.6822
Q4G0P3;Q4G0P3-5;F8WD03;Q4G0P3-10;Q4G0P3-6;Q4G0P3-8;J3QL79;J3QQJ7;Q4G0P3-2;A0A087WVK9	19	2	108.573	6.13035e-05	0.000188636	1.43784	1	CM55	PM54	581311	Hydrocephalus-inducing protein homolog OS=Homo sapiens OX=9606 GN=HYDIN PE=1 SV=3	3496.94	3676.87	3520.69	2526.9	2495.1	2415.9
Q8TD84;Q8TD84-2	6	1	25.3045	6.38686e-05	0.000192414	10.3552	1	PM54	CM55	226288	Down syndrome cell adhesion molecule-like protein 1 OS=Homo sapiens OX=9606 GN=DSCAML1 PE=1 SV=2	36.1147	48.0131	54.4571	461.866	534.047	439.164
K7EML9;K7ER96;O43396	1	1	5.9974	6.46827e-05	0.000192414	67.7372	1	CM55	PM54	15990	Thioredoxin-like protein 1 (Fragment) OS=Homo sapiens OX=9606 GN=TXNL1 PE=1 SV=1	841.526	385.41	532.742	9.43501	7.33646	9.20657
P20618	5	2	23.2679	6.4743e-05	0.000192414	1.36992	1	CM55	PM54	26717.5	Proteasome subunit beta type-1 OS=Homo sapiens OX=9606 GN=PSMB1 PE=1 SV=2	1904.6	1921.24	1822.81	1392.07	1354.35	1376.93
REVERSE28780	1	1	4.2566	6.48154e-05	0.000192414	2.99411	1	CM55	PM54	196312	Reversed Sequence 28780	505.332	534.759	619.743	187.979	178.763	187.623
P04792;F8WE04;C9J3N8	13	10	103.875	6.4993e-05	0.000192414	1.36349	1	CM55	PM54	22839.6	Heat shock protein beta-1 OS=Homo sapiens OX=9606 GN=HSPB1 PE=1 SV=2	17097.8	16454.5	16421.1	11974	12190.6	12486.4
REVERSE35949	3	1	21.56	6.60966e-05	0.00019421	1.60407	1	CM55	PM54	133289	Reversed Sequence 35949	2079.11	2152.32	2102.44	1314.43	1259.1	1375.08
P13747;Q6DU44;A0A140T9Z7;A0A140TA12;F8W9Z8	8	3	35.9421	6.8651e-05	0.000199973	3.5215	1	CM55	PM54	40384.9	HLA class I histocompatibility antigen_ alpha chain E OS=Homo sapiens OX=9606 GN=HLA-E PE=1 SV=3	728.005	616.288	773.493	194.448	195.168	211.772
REVERSE2525	1	1	4.0301	6.96428e-05	0.000199973	26.3566	1	CM55	PM54	57690.3	Reversed Sequence 2525	689.38	644.559	715.751	18.3155	35.4709	23.9813
Q05BV3;Q05BV3-5;Q05BV3-2;H0YJS1	10	2	37.7885	6.97915e-05	0.000199973	70.9387	1	PM54	CM55	222506	Echinoderm microtubule-associated protein-like 5 OS=Homo sapiens OX=9606 GN=EML5 PE=2 SV=3	7.72638	15.3797	6.98375	731.024	632.879	770.63
A0A1C7CYX9;Q16555;Q16555-2;E5RFU4	10	3	70.2819	7.02386e-05	0.000199973	1.93875	1	CM55	PM54	74073.3	Dihydropyrimidinase-related protein 2 OS=Homo sapiens OX=9606 GN=DPYSL2 PE=1 SV=1	2591.51	2773.02	2883.88	1353.03	1451.37	1450.09
Q4KWH8;A0A2U3TZV8;Q4KWH8-2;Q4KWH8-3;Q4KWH8-4	11	1	38.0453	7.06168e-05	0.000199973	2.11724	1	PM54	CM55	191333	1-phosphatidylinositol 4_5-bisphosphate phosphodiesterase eta-1 OS=Homo sapiens OX=9606 GN=PLCH1 PE=1 SV=1	500.993	475.238	538.446	1028.52	1057.27	1121.14
E7EMF1;E7ESP4;E9PB77	13	1	90.1703	7.13228e-05	0.000200036	26.8945	1	CM55	PM54	89474.7	Integrin alpha-2 OS=Homo sapiens OX=9606 GN=ITGA2 PE=1 SV=1	829.329	991.712	951.259	43.2016	23.0367	36.8421
O43765;K7EMD6	3	1	20.1035	7.20302e-05	0.000200036	2.52851	1	CM55	PM54	34291.3	Small glutamine-rich tetratricopeptide repeat-containing protein alpha OS=Homo sapiens OX=9606 GN=SGTA PE=1 SV=1	1844.22	1693.72	1919.44	662.694	755.583	740.057
REVERSE6796	3	2	11.1804	7.21747e-05	0.000200036	4.06535	1	CM55	PM54	91589.8	Reversed Sequence 6796	98.9147	100.614	99.493	28.684	23.0196	21.8502
Q00765;E2QRG8;B7Z332;B7Z510;H0Y8J8;Q00765-2	4	2	30.5249	7.35333e-05	0.000201939	3.43106	1	PM54	CM55	21721.3	Receptor expression-enhancing protein 5 OS=Homo sapiens OX=9606 GN=REEP5 PE=1 SV=3	81.2277	92.5799	101.325	295.054	314.804	334.136
Q14651;C9JAM8;C9J0F3;C9J359;C9JAM3;C9JU08;C9JVY2;C9JYI1	8	1	49.4021	7.40599e-05	0.000201939	1.51686	1	CM55	PM54	70652.8	Plastin-1 OS=Homo sapiens OX=9606 GN=PLS1 PE=1 SV=2	62.7672	65.9054	64.6335	40.7656	43.2538	43.4192
P31948;P31948-2;P31948-3;F5H783;F5GXD8	5	1	38.6105	7.44114e-05	0.000201939	1.49246	1	CM55	PM54	63266.7	Stress-induced-phosphoprotein 1 OS=Homo sapiens OX=9606 GN=STIP1 PE=1 SV=1	1684.66	1745.3	1621.75	1108.11	1125.75	1150.94
Q4LDE5;A0A0A0MSD0;Q4LDE5-2;Q4LDE5-4	11	1	47.8468	7.57067e-05	0.000202729	9.4082	1	PM54	CM55	404941	Sushi_ von Willebrand factor type A_ EGF and pentraxin domain-containing protein 1 OS=Homo sapiens OX=9606 GN=SVEP1 PE=1 SV=3	48.0768	72.8604	57.7798	602.903	494.54	583.962
A0A140LJL2;Q8N350	1	1	7.232	7.57399e-05	0.000202729	2.0236	1	CM55	PM54	76278	Voltage-dependent calcium channel beta subunit-associated regulatory protein OS=Homo sapiens OX=9606 GN=CBARP PE=1 SV=1	45133.8	45254.3	41443.9	22876.5	20556.9	21713.9
Q9BVQ7;Q9BVQ7-2;Q9BVQ7-3	3	1	15.6789	7.71318e-05	0.00020505	1.86529	1	PM54	CM55	81565.8	Spermatogenesis-associated protein 5-like protein 1 OS=Homo sapiens OX=9606 GN=SPATA5L1 PE=1 SV=2	2304.86	2226.02	2459.64	4468.65	4425.42	4145.26
P24534;C9JZW3;F2Z2G2;F8WF65	6	6	48.676	7.94948e-05	0.000209904	1.46372	1	CM55	PM54	24934.8	Elongation factor 1-beta OS=Homo sapiens OX=9606 GN=EEF1B2 PE=1 SV=3	15074.6	15078.1	15291.1	10250.7	9998.06	10797.9
P49454;A0A087WTY4	15	2	71.3832	8.27723e-05	0.000217091	2.47722	1	CM55	PM54	371073	Centromere protein F OS=Homo sapiens OX=9606 GN=CENPF PE=1 SV=2	332.267	361.021	361.684	134.855	135.062	155.952
P30520	6	2	28.8832	8.34459e-05	0.000217399	2.0244	1	CM55	PM54	50496.6	Adenylosuccinate synthetase isozyme 2 OS=Homo sapiens OX=9606 GN=ADSS PE=1 SV=3	4441.94	4380.83	3914.26	2119.45	2141.93	2030.37
P21980;P21980-2;A2A299;P21980-3;A2A2A0	27	20	169.679	8.46939e-05	0.000219189	2.06446	1	CM55	PM54	78469.5	Protein-glutamine gamma-glutamyltransferase 2 OS=Homo sapiens OX=9606 GN=TGM2 PE=1 SV=2	17165.5	18022.9	18808.7	8364.64	8433	9357.98
P06753	30	9	157.598	8.55809e-05	0.000220027	1.62979	1	CM55	PM54	33007.1	Tropomyosin alpha-3 chain OS=Homo sapiens OX=9606 GN=TPM3 PE=1 SV=2	9094.2	9525.87	8952.09	5759.12	5783.94	5374.59
Q14643;Q14643-2;Q14643-3;Q14643-4;Q14643-5;Q14643-6;Q14643-7;Q14643-8;B7ZMI3	17	3	73.5986	8.77338e-05	0.000224088	2.61833	1	CM55	PM54	317351	Inositol 1_4_5-trisphosphate receptor type 1 OS=Homo sapiens OX=9606 GN=ITPR1 PE=1 SV=3	539.544	635.93	537.387	226.961	216.962	210.258
Q96TA1;Q96TA1-2	11	7	64.8482	9.04967e-05	0.000227405	1.70716	1	CM55	PM54	84651.3	Niban-like protein 1 OS=Homo sapiens OX=9606 GN=FAM129B PE=1 SV=3	1281.97	1266.45	1318.32	786.854	768.823	709.334
Q14159;B3KP42;H0YBC9;Q14159-2;Q14159-3	2	1	9.2085	9.0682e-05	0.000227405	1.36708	1	CM55	PM54	102198	DNA repair-scaffolding protein OS=Homo sapiens OX=9606 GN=SPIDR PE=1 SV=2	3383.6	3534.47	3430.94	2480	2491.76	2598.4
P60891;B1ALA9;A0A2R8Y7H4;P60891-2;B7ZB02;A0A0B4J207;P21108;B1ALA7;H7C540;Q15244	11	4	93.9226	9.07783e-05	0.000227405	2.61376	1	PM54	CM55	35347.5	Ribose-phosphate pyrophosphokinase 1 OS=Homo sapiens OX=9606 GN=PRPS1 PE=1 SV=2	1534.39	1847.17	1780.21	4403.08	4688.63	4399.92
REVERSE36961	4	1	16.7781	9.22719e-05	0.000228376	Infinity	1	PM54	CM55	48829	Reversed Sequence 36961	0	0	0	53.8255	113.768	41.0225
Q5TC82	1	1	9.2666	9.28971e-05	0.000228376	2.30907	1	CM55	PM54	126706	Roquin-1 OS=Homo sapiens OX=9606 GN=RC3H1 PE=1 SV=1	295.029	309.021	302.685	118.052	139.633	134.999
P62258;P62258-2;K7EM20;B4DJF2;I3L3T1;K7EIT4;I3L0W5	16	9	139.594	9.34504e-05	0.000228376	1.47582	1	CM55	PM54	29345	14-3-3 protein epsilon OS=Homo sapiens OX=9606 GN=YWHAE PE=1 SV=1	11736.3	12325.4	12295.5	8439.41	7920.34	8275.65
P11908;P11908-2;A6NMS2;D3YTJ7	10	1	62.7289	9.41487e-05	0.000228376	5.93809	1	PM54	CM55	35168.4	Ribose-phosphate pyrophosphokinase 2 OS=Homo sapiens OX=9606 GN=PRPS2 PE=1 SV=2	17.0562	22.1835	23.583	111.533	133.727	127.787
Q01082;A0A087WUZ3;Q01082-2;Q01082-3;F8W6C1	37	11	190.969	9.47731e-05	0.000228376	1.36491	1	CM55	PM54	275408	Spectrin beta chain_ non-erythrocytic 1 OS=Homo sapiens OX=9606 GN=SPTBN1 PE=1 SV=2	3953.25	3912.44	4093.48	2901.11	3000.71	2860.05
Q96G03;Q96G03-2;E7ENQ8;E9PD70	5	1	28.3872	9.48217e-05	0.000228376	3.53133	1	CM55	PM54	68796.7	Phosphoglucomutase-2 OS=Homo sapiens OX=9606 GN=PGM2 PE=1 SV=4	727.433	689.331	668.305	196.877	222.69	170.883
REVERSE24258	11	2	44.2932	9.59335e-05	0.000228376	7.63602	1	CM55	PM54	163435	Reversed Sequence 24258	580.219	500.442	408.44	64.5729	74.1486	56.2886
P08758;D6RBL5;D6RBE9;E9PHT9;D6RCN3	40	33	171.171	9.62226e-05	0.000228376	1.60132	1	CM55	PM54	35993.9	Annexin A5 OS=Homo sapiens OX=9606 GN=ANXA5 PE=1 SV=2	36043	38303.8	38670.7	24468	23233.7	22875.9
P04406;P04406-2;E7EUT5	60	41	234.301	9.68622e-05	0.000228376	1.39758	1	CM55	PM54	36224.4	Glyceraldehyde-3-phosphate dehydrogenase OS=Homo sapiens OX=9606 GN=GAPDH PE=1 SV=3	105051	109576	109679	76200.3	76014	79833.3
E9PL69;P23921	1	1	3.5933	9.70098e-05	0.000228376	2.84972	1	CM55	PM54	65635.6	Ribonucleoside-diphosphate reductase large subunit OS=Homo sapiens OX=9606 GN=RRM1 PE=1 SV=1	659.239	631.509	598.845	207.237	248.769	207.074
P30101	30	20	179.848	9.82508e-05	0.000228985	1.67493	1	CM55	PM54	57181.6	Protein disulfide-isomerase A3 OS=Homo sapiens OX=9606 GN=PDIA3 PE=1 SV=4	12391.7	11771	11341.7	7221.29	7200.49	6775.72
REVERSE19916	4	1	15.6868	9.88394e-05	0.000228985	2.07661	1	CM55	PM54	410195	Reversed Sequence 19916	1965.59	1920.69	1844.66	992.317	854.872	912.569
O00750;F5GWN5	9	2	46.8549	9.90265e-05	0.000228985	5.15569	1	PM54	CM55	186935	Phosphatidylinositol 4-phosphate 3-kinase C2 domain-containing subunit beta OS=Homo sapiens OX=9606 GN=PIK3C2B PE=1 SV=2	168.201	122.627	163.866	771.203	745.536	827.523
P09382	35	25	143.83	0.000100321	0.000230615	1.24454	1	CM55	PM54	15057.9	Galectin-1 OS=Homo sapiens OX=9606 GN=LGALS1 PE=1 SV=2	47352.6	46044.9	45618.9	36639.7	37721.1	37340
Q8TCU4;A0A087WTU9;Q8TCU4-2;A0A087WV20;Q8TCU4-3	36	5	164.36	0.000106296	0.000240673	1.82956	1	CM55	PM54	463458	Alstrom syndrome protein 1 OS=Homo sapiens OX=9606 GN=ALMS1 PE=1 SV=4	1073.73	1096.37	1195.85	624.321	587.142	628.297
Q8IWB6;Q8IWB6-2;Q8IWB6-3;J3QKU8	8	1	37.9111	0.000106769	0.000240673	46.5313	1	CM55	PM54	169213	Inactive serine/threonine-protein kinase TEX14 OS=Homo sapiens OX=9606 GN=TEX14 PE=1 SV=2	784.611	632.418	491.254	10.3908	10.6302	19.9896
A0A1W2PPS1;Q00839;Q00839-2;A0A1W2PP35;A0A1X7SBS1;Q5RI18;A0A1W2PP34;A0A1W2PPH7;A0A1W2PPL4;A0A1W2PQL0;A0A1W2PQ74;A0A1W2PRZ7;A0A1W2PQD4;A0A1W2PP22	13	8	85.6728	0.000107216	0.000240673	1.64506	1	CM55	PM54	89116.6	Heterogeneous nuclear ribonucleoprotein U OS=Homo sapiens OX=9606 GN=HNRNPU PE=1 SV=1	6134.38	6519.76	6825.03	4026.39	3894.31	3920.32
P08238;Q58FF7;Q58FF6;Q58FG1	56	28	330.025	0.000107404	0.000240673	1.77429	1	CM55	PM54	83606.5	Heat shock protein HSP 90-beta OS=Homo sapiens OX=9606 GN=HSP90AB1 PE=1 SV=4	13484.8	12800.5	14103.6	7233.06	7875.41	7655
F2Z2E2;Q86VI3	11	2	50.0734	0.000107776	0.000240673	10.124	1	CM55	PM54	180112	Ras GTPase-activating-like protein IQGAP3 OS=Homo sapiens OX=9606 GN=IQGAP3 PE=1 SV=1	341.31	253.452	298.838	30.3435	35.0661	22.8557
O14818;H0Y586;O14818-2;O14818-4;A0A087WYS6;Q8TAA3;Q8TAA3-2;Q8TAA3-5	5	3	32.7801	0.000112796	0.000250453	1.44468	1	CM55	PM54	28058	Proteasome subunit alpha type-7 OS=Homo sapiens OX=9606 GN=PSMA7 PE=1 SV=1	2170.88	2225.55	2085.47	1451.99	1505.31	1529.44
Q06210;Q06210-2	17	4	112.521	0.000114308	0.000252376	1.58219	1	CM55	PM54	79605	Glutamine--fructose-6-phosphate aminotransferase [isomerizing] 1 OS=Homo sapiens OX=9606 GN=GFPT1 PE=1 SV=3	1339.97	1377.71	1268.69	869.967	817.179	832.372
P08865;A0A0C4DG17;C9J9K3;F8WD59	13	11	54.1347	0.000115419	0.000253396	1.29899	1	CM55	PM54	32968.2	40S ribosomal protein SA OS=Homo sapiens OX=9606 GN=RPSA PE=1 SV=4	6447.77	6649.08	6636.24	5134.28	4919.42	5137.4
Q15365	7	4	37.6254	0.000116401	0.000253455	1.27373	1	CM55	PM54	38011.1	Poly(rC)-binding protein 1 OS=Homo sapiens OX=9606 GN=PCBP1 PE=1 SV=2	4618.18	4522.76	4375.23	3556.58	3512.39	3542.55
REVERSE9251	2	1	8.7509	0.000116883	0.000253455	1155.75	1	CM55	PM54	68683	Reversed Sequence 9251	615.682	724.306	740.239	0	0	1.79989
O60229;J3QSW6;H7BXZ5;C9IZQ6;O60229-2;O60229-3;O60229-4	18	3	68.3254	0.000117391	0.000253455	2.79353	1	PM54	CM55	343311	Kalirin OS=Homo sapiens OX=9606 GN=KALRN PE=1 SV=2	331.141	306.591	384.545	919.23	980.58	955.96
P55735;P55735-2;P55735-3;P55735-4;A8MXL6	4	4	25.7627	0.000119305	0.0002551	1.40968	1	CM55	PM54	36053.8	Protein SEC13 homolog OS=Homo sapiens OX=9606 GN=SEC13 PE=1 SV=3	2081.32	1956.62	2024.03	1398.85	1430.01	1471.39
Q08211;Q08211-2	10	3	53.2635	0.000119459	0.0002551	1.28586	1	CM55	PM54	142270	ATP-dependent RNA helicase A OS=Homo sapiens OX=9606 GN=DHX9 PE=1 SV=4	869.972	903.035	875.267	692.686	697.032	669.824
Q8N1N4;Q8N1N4-2	7	1	43.077	0.000120447	0.000255811	1.48224	1	CM55	PM54	57664.3	Keratin_ type II cytoskeletal 78 OS=Homo sapiens OX=9606 GN=KRT78 PE=1 SV=2	1424.62	1476.71	1531.34	985.808	975.493	1029.22
A0A2R8Y5F1;A0A2R8Y7C8;A0A2R8YDR3;A0A2R8YGD6;A0A2R8YGU4;H3BMQ0;P49815;P49815-2;P49815-3;P49815-4;P49815-5;P49815-7;X5D2U8;A0A2R8Y7X5;A0A2R8YDZ2;P49815-6;A0A2R8YEJ8;A0A2R8Y5B2;A0A2R8YGE6;C9JX95	6	1	22.2816	0.000121761	0.000255881	5.01014	1	PM54	CM55	195030	Tuberin OS=Homo sapiens OX=9606 GN=TSC2 PE=1 SV=1	198.241	154.31	146.643	830.443	917.872	752.721
P50990;P50990-2;P50990-3;H7C4C8;H7C2U0	18	10	100.692	0.000121789	0.000255881	1.24212	1	CM55	PM54	60191	T-complex protein 1 subunit theta OS=Homo sapiens OX=9606 GN=CCT8 PE=1 SV=4	2508.94	2519.69	2549.89	1978.27	2055.03	2067.96
REVERSE30625	2	1	7.4589	0.000122689	0.000256394	2.58776	1	CM55	PM54	86299.3	Reversed Sequence 30625	1026.1	1024.68	908.818	362.107	361.014	420.572
O43852;O43852-3;O43852-6;O43852-10;O43852-5;O43852-15;H0Y875;O43852-11;O43852-13;O43852-14;O43852-9;O43852-12	21	7	162.917	0.000133553	0.000277423	1.34719	1	CM55	PM54	37220.9	Calumenin OS=Homo sapiens OX=9606 GN=CALU PE=1 SV=2	3743.25	3576.87	3681.09	2679.1	2678.22	2808.7
P40121;P40121-2;E7ENU9;B8ZZL6;H7C0X8	7	2	48.0618	0.000134172	0.000277423	25.5416	1	CM55	PM54	38783.7	Macrophage-capping protein OS=Homo sapiens OX=9606 GN=CAPG PE=1 SV=2	1506.45	1433.09	1292.67	78.8002	36.4485	50.4499
O94986;O94986-1;O94986-2;O94986-3	4	1	20.7921	0.000139867	0.000287677	3.03858	1	CM55	PM54	198022	Centrosomal protein of 152 kDa OS=Homo sapiens OX=9606 GN=CEP152 PE=1 SV=4	790.229	981.434	770.206	277.083	284.007	275.442
P52565;J3KTF8;J3QQX2;J3KRE2;J3KRY1;P52565-2;J3KS60	8	5	43.5608	0.000142663	0.000287973	1.39679	1	CM55	PM54	23264.2	Rho GDP-dissociation inhibitor 1 OS=Homo sapiens OX=9606 GN=ARHGDIA PE=1 SV=3	8501.74	8130.06	8018.81	5938.33	5705.04	6004.72
Q5T670;Q7L590;Q7L590-2	3	2	17.3216	0.000142832	0.000287973	1.54175	1	CM55	PM54	97320.4	MCM10 minichromosome maintenance deficient 10 (S. cerevisiae)_ isoform CRA_b OS=Homo sapiens OX=9606 GN=MCM10 PE=1 SV=1	601.59	641.865	602.075	383.798	399.576	413.658
A0A096LP62;C9J2H1;G5E9D8;H7C5A6;Q86UX2;Q86UX2-2;Q86UX2-3	2	1	9.6378	0.000143331	0.000287973	1.87012	1	CM55	PM54	80974.3	Inter-alpha-trypsin inhibitor heavy chain H5 OS=Homo sapiens OX=9606 GN=ITIH5 PE=1 SV=1	1489.37	1326.18	1513.73	759.189	793.72	762.063
P28482;P28482-2;B3KR49;E9PBK7;E9PJF0;E9PQW4;H0YDH9;P27361;P27361-2;P27361-3	5	2	23.6913	0.000143755	0.000287973	1.61771	1	PM54	CM55	41789	Mitogen-activated protein kinase 1 OS=Homo sapiens OX=9606 GN=MAPK1 PE=1 SV=3	546.42	541.211	558.643	832.73	928.417	902.04
P23396;P23396-2;E9PL09;E9PPU1;H0YEU2;F2Z2S8;H0YCJ7;H0YF32;E9PJH4;E9PK82;E9PQ96;E9PSF4;E9PQX2;H0YES8	18	14	77.9749	0.000143876	0.000287973	1.21411	1	CM55	PM54	26859.4	40S ribosomal protein S3 OS=Homo sapiens OX=9606 GN=RPS3 PE=1 SV=2	8773.6	8891.7	8797.49	7168.44	7171.04	7456.61
Q01813;Q01813-2;B1APP8;B1APP6;Q5VSR5;V9GYV7;H0Y757;V9GY25	26	11	180.863	0.000144432	0.000287973	1.43479	1	CM55	PM54	86508.7	ATP-dependent 6-phosphofructokinase_ platelet type OS=Homo sapiens OX=9606 GN=PFKP PE=1 SV=2	4282	3946.14	4070.36	2806.4	2889.23	2876.01
Q5TCZ1;H0Y507;Q5TCZ1-2;Q5TCZ1-3	6	1	33.3429	0.000145724	0.000289074	4.16095	1	CM55	PM54	125974	SH3 and PX domain-containing protein 2A OS=Homo sapiens OX=9606 GN=SH3PXD2A PE=1 SV=1	651.874	644.728	529.063	127.595	145.814	165.353
Q66K14;Q66K14-2	2	1	11.9336	0.000149425	0.000294918	4405.64	1	PM54	CM55	141666	TBC1 domain family member 9B OS=Homo sapiens OX=9606 GN=TBC1D9B PE=1 SV=3	0	0.0562792	0	40.7421	138.014	69.1896
REVERSE2171	6	1	27.9097	0.00015123	0.000296981	Infinity	1	CM55	PM54	214077	Reversed Sequence 2171	324.92	81.0373	242.825	0	0	0
Q12841;Q12841-2	2	1	9.0843	0.000154026	0.000300563	5.30407	1	CM55	PM54	36126.1	Follistatin-related protein 1 OS=Homo sapiens OX=9606 GN=FSTL1 PE=1 SV=1	618.018	425.092	577.336	95.9869	103.467	106.056
P62861;E9PR30	3	3	7.3481	0.000154592	0.000300563	1.70078	1	PM54	CM55	6647.87	40S ribosomal protein S30 OS=Homo sapiens OX=9606 GN=FAU PE=1 SV=1	833.548	810.804	868.66	1498.36	1340.43	1435.31
P0CG47;B4DV12;F5GXK7;F5GYU3;F5H265;F5H2Z3;F5H388;F5H6Q2;F5H747;J3QKN0;J3QS39;J3QTR3;P0CG48;P62987;Q5PY61;Q96C32;M0R1V7;Q49A90;F5GZ39;M0R1M6;M0R2S1;J3QSA3	15	9	61.8061	0.000155873	0.000301553	1.29727	1	CM55	PM54	25818.7	Polyubiquitin-B OS=Homo sapiens OX=9606 GN=UBB PE=1 SV=1	22026.7	20967.7	21852.4	16461.8	17025.1	16500.3
REVERSE12987	5	1	27.2935	0.000157219	0.000302659	1.76126	1	CM55	PM54	80132.2	Reversed Sequence 12987	5383.22	5297.84	6013.26	3119.49	3211.24	3147.9
P35555	6	3	22.1175	0.000164976	0.000316034	3.36967	1	CM55	PM54	332882	Fibrillin-1 OS=Homo sapiens OX=9606 GN=FBN1 PE=1 SV=3	1460.4	1526.84	1426.73	447.855	367.693	494.367
P04632;A0A0C4DGQ5;K7ELJ7;A0A075B7C0;K7EIV0;K7EKD8;K7EM73;U3KQE2;K7EMQ1;Q96L46;S4R3F9	7	4	34.5096	0.000165948	0.000316346	1.31294	1	CM55	PM54	28486.9	Calpain small subunit 1 OS=Homo sapiens OX=9606 GN=CAPNS1 PE=1 SV=1	2209.51	2179.31	2286.46	1669.46	1742.14	1672.64
Q9UL68;Q9UL68-4;A0A2R8YF72;H7BYU4;Q9UL68-3	11	4	53.0164	0.000167924	0.000318558	1.44547	1	CM55	PM54	135211	Myelin transcription factor 1-like protein OS=Homo sapiens OX=9606 GN=MYT1L PE=2 SV=3	8674.74	8840.32	8937.8	6088.32	5835.24	6376.96
P67936;A0A2R8Y5V9;A0A2R8YE05;K7ENT6;A0A2R8YGX3;A0A2R8YH90;A0A2R8YEU4;K7ERG3;K7EMU5;K7EPB9;A0A2R8YHD2;K7EPV9	21	5	227.306	0.000174941	0.000326448	1.40993	1	CM55	PM54	28635.9	Tropomyosin alpha-4 chain OS=Homo sapiens OX=9606 GN=TPM4 PE=1 SV=3	7920.21	7734.65	8398.2	5676.65	5623.43	5759.69
Q32P28;Q32P28-3;Q32P28-4;H7C2W6;Q32P28-2	6	3	32.9606	0.000175374	0.000326448	1.43182	1	CM55	PM54	84249.5	Prolyl 3-hydroxylase 1 OS=Homo sapiens OX=9606 GN=P3H1 PE=1 SV=2	211.653	221.623	225.364	150.089	159.17	150.743
Q8N0Y7	5	1	40.7565	0.000175404	0.000326448	1.80992	1	CM55	PM54	28948	Probable phosphoglycerate mutase 4 OS=Homo sapiens OX=9606 GN=PGAM4 PE=3 SV=1	810.414	921.693	915.158	492.028	496.033	474.582
REVERSE10585	2	1	8.1706	0.000175424	0.000326448	3.51888	1	PM54	CM55	97296	Reversed Sequence 10585	183.252	205.203	231.342	636.055	773.121	771.816
P09914;P09914-2	9	5	53.7613	0.00017788	0.000329448	1878.35	1	CM55	PM54	55816.7	Interferon-induced protein with tetratricopeptide repeats 1 OS=Homo sapiens OX=9606 GN=IFIT1 PE=1 SV=2	1689.62	1657.31	1497.61	2.57915	0	0
REVERSE27554	4	2	24.5785	0.000180653	0.000333007	2.39561	1	CM55	PM54	121518	Reversed Sequence 27554	1346.91	1667.81	1417.95	606.018	623.553	620.764
REVERSE11001	6	1	25.4284	0.000187354	0.000342735	1.46538	1	CM55	PM54	262784	Reversed Sequence 11001	13403.7	13394	13649.7	9701.38	8817.85	9082.71
O00151	8	2	50.3201	0.000187685	0.000342735	2.03079	1	CM55	PM54	36528	PDZ and LIM domain protein 1 OS=Homo sapiens OX=9606 GN=PDLIM1 PE=1 SV=4	1758.28	2011.62	1946.91	892.827	919.504	1002.73
P35579;P35579-2;Q5BKV1;B1AH99;A0A2R8Y4C3	219	137	1469.68	0.000191164	0.000347465	1.25602	1	PM54	CM55	227787	Myosin-9 OS=Homo sapiens OX=9606 GN=MYH9 PE=1 SV=4	36936.8	35442.6	36528.8	45714.6	46487.4	44589
O75886;O75886-2	5	2	29.2456	0.000194346	0.000351613	4.16583	1	PM54	CM55	58563.5	Signal transducing adapter molecule 2 OS=Homo sapiens OX=9606 GN=STAM2 PE=1 SV=1	284.9	225.763	323.106	1136.98	1108.38	1227.98
H3BRJ5;Q9P2H3;Q9P2H3-2;Q9P2H3-3;C9IZR2;C9JUJ1	2	2	14.4737	0.000202814	0.000362674	1.84446	1	CM55	PM54	109936	Uncharacterized protein OS=Homo sapiens OX=9606 PE=4 SV=1	568.11	515.317	506.594	298.385	293.505	270.164
P15144	13	5	79.0723	0.000203141	0.000362674	1.34733	1	CM55	PM54	109939	Aminopeptidase N OS=Homo sapiens OX=9606 GN=ANPEP PE=1 SV=4	935.085	975.039	952.837	730.822	683.231	710.858
P60903	5	1	30.9975	0.000203244	0.000362674	3.14331	1	PM54	CM55	11317.2	Protein S100-A10 OS=Homo sapiens OX=9606 GN=S100A10 PE=1 SV=2	149.639	115.844	126.288	378.123	444.49	408.848
P05023;P05023-4;P05023-2;P05023-3;Q5TC01;Q5TC02	9	3	52.6603	0.00020796	0.000369404	1.78345	1	CM55	PM54	114208	Sodium/potassium-transporting ATPase subunit alpha-1 OS=Homo sapiens OX=9606 GN=ATP1A1 PE=1 SV=1	1509.98	1751.71	1636.8	896.737	936.291	913.608
Q68DG0;Q8N241;Q9UBY9;Q9UBY9-2;C9J5A3;D3YTC6	3	2	21.9597	0.000210441	0.000372119	2.21381	1	CM55	PM54	19074	Heat shock protein beta-7 OS=Homo sapiens OX=9606 GN=HSPB7 PE=1 SV=1	1832.7	1703.04	1495.18	763.556	774.089	734.865
P67809;H0Y449;C9J5V9;Q9Y2T7;A0A0D9SEI8;P16989;P16989-2;P16989-3	7	5	54.4757	0.000214064	0.00037682	1.64091	1	CM55	PM54	35924.2	Nuclease-sensitive element-binding protein 1 OS=Homo sapiens OX=9606 GN=YBX1 PE=1 SV=3	4844	4620.77	4649.06	2807.14	2724.63	3069.46
Q96HH9;B7Z4W8;D6REP5;E9PD09;Q96HH9-2;Q96HH9-3;Q96HH9-4;Q96HH9-5	2	1	10.6097	0.000221994	0.000389026	3.31076	1	CM55	PM54	48325.5	GRAM domain-containing protein 2B OS=Homo sapiens OX=9606 GN=GRAMD2B PE=1 SV=1	912.995	837.401	1025.76	311.47	241.967	285.09
Q8IY21;H0Y9B2	7	3	28.3713	0.00022505	0.000392622	2.30523	1	CM55	PM54	199849	Probable ATP-dependent RNA helicase DDX60 OS=Homo sapiens OX=9606 GN=DDX60 PE=1 SV=3	325.354	315.914	328.342	144.077	153.393	123.143
P78417;P78417-3;Q5TA02;P78417-2;Q5TA01	7	4	33.8472	0.000236761	0.000410195	1.59147	1	CM55	PM54	27851	Glutathione S-transferase omega-1 OS=Homo sapiens OX=9606 GN=GSTO1 PE=1 SV=2	1814.65	2032.66	1839.59	1202.43	1203.43	1167.51
Q9Y2K3	12	1	46.5085	0.000239951	0.000410195	Infinity	1	CM55	PM54	226045	Myosin-15 OS=Homo sapiens OX=9606 GN=MYH15 PE=1 SV=5	73.1876	32.675	126.889	0	0	0
P0DMS9;P0DMS9-2;Q5QNY8	4	1	18.012	0.000240236	0.000410195	20.5392	1	CM55	PM54	30897.4	Transmembrane domain-containing protein TMIGD3 OS=Homo sapiens OX=9606 GN=TMIGD3 PE=1 SV=1	248.502	242.124	225.814	9.1627	7.96512	17.7537
REVERSE13279	4	1	22.1013	0.000240685	0.000410195	Infinity	1	PM54	CM55	172303	Reversed Sequence 13279	0	0	0	25.9141	92.6477	60.7223
O43390;O43390-2;O43390-3;O43390-4;B4DT28	7	2	41.463	0.000241393	0.000410195	1.54586	1	CM55	PM54	71228.3	Heterogeneous nuclear ribonucleoprotein R OS=Homo sapiens OX=9606 GN=HNRNPR PE=1 SV=1	389.4	388.951	398.035	265.821	258.114	237.055
P00387;P00387-2;P00387-3;B1AHF3	8	5	57.6319	0.000241421	0.000410195	1.44863	1	CM55	PM54	34463	NADH-cytochrome b5 reductase 3 OS=Homo sapiens OX=9606 GN=CYB5R3 PE=1 SV=3	6323.45	6627.24	6893.57	4418.91	4630.53	4649.17
Q13509;A0A0B4J269;Q13509-2;G3V2A3;G3V2N6;G3V2R8;G3V3R4;G3V5W4	23	2	232.955	0.0002478	0.000419211	1.74225	1	PM54	CM55	50889	Tubulin beta-3 chain OS=Homo sapiens OX=9606 GN=TUBB3 PE=1 SV=2	244.691	241.738	230.04	422.622	384.413	441.236
REVERSE14958	6	1	33.6475	0.000249829	0.0004202	1.6043	1	CM55	PM54	88298.6	Reversed Sequence 14958	4265.93	4432.74	3962.51	2689.65	2528.68	2673.69
REVERSE19794	4	1	21.0327	0.000250535	0.0004202	1.79641	1	CM55	PM54	135114	Reversed Sequence 19794	4708.02	4416.74	4859.14	2703.54	2399.26	2681.55
Q02809;Q02809-2;Q5JXB7;Q5JXB8	12	6	67.6977	0.0002535	0.000423012	1.37883	1	CM55	PM54	84120.6	Procollagen-lysine_2-oxoglutarate 5-dioxygenase 1 OS=Homo sapiens OX=9606 GN=PLOD1 PE=1 SV=2	1172.07	1094.66	1114.06	826.959	833.782	791.182
P04181;P04181-2;Q96K76-3	6	2	32.7919	0.000254377	0.000423012	1.6391	1	PM54	CM55	48877.1	Ornithine aminotransferase_ mitochondrial OS=Homo sapiens OX=9606 GN=OAT PE=1 SV=1	900.075	849.41	953.782	1539.09	1424.22	1467.61
Q04917;A2IDB2	9	3	85.0515	0.000256513	0.000423162	1.38042	1	CM55	PM54	28389.9	14-3-3 protein eta OS=Homo sapiens OX=9606 GN=YWHAH PE=1 SV=4	3141.55	3055.31	2915.92	2166.22	2266.35	2168.88
A0A0J9YY01;Q96JP2;A0A286YF23;A0A0J9YW50;A0A0J9YYJ7;A0A2R8YFM0;A0A0J9YXD6	11	4	53.6068	0.000256632	0.000423162	2.97223	1	PM54	CM55	336004	Unconventional myosin-XVB OS=Homo sapiens OX=9606 GN=MYO15B PE=1 SV=1	535.808	453.543	394.736	1355.96	1413.67	1344.19
Q14689;Q14689-5;Q14689-6;Q14689-2;Q14689-4	3	1	11.6859	0.000262426	0.000430896	1.5907	1	CM55	PM54	172480	Disco-interacting protein 2 homolog A OS=Homo sapiens OX=9606 GN=DIP2A PE=1 SV=2	705.474	697.546	687.224	412.278	432.85	468.912
P23528;E9PK25;G3V1A4;E9PP50;E9PQB7;E9PLJ3;E9PS23	19	15	87.37	0.000266822	0.000436281	1.36525	1	CM55	PM54	18730.6	Cofilin-1 OS=Homo sapiens OX=9606 GN=CFL1 PE=1 SV=3	16942.4	17038.6	15761.7	12022.7	12162.3	12249.8
P60174;P60174-1;P60174-4;U3KPZ0;U3KQF3;U3KPS5	39	30	161.052	0.000272118	0.000443086	1.62561	1	CM55	PM54	31076.2	Triosephosphate isomerase OS=Homo sapiens OX=9606 GN=TPI1 PE=1 SV=3	28235.8	27860.6	30708	17542	17137.1	18718.7
REVERSE14579	5	1	28.6634	0.000278431	0.000451485	2.34762	1	CM55	PM54	90642.6	Reversed Sequence 14579	561.16	547.443	484.983	231.908	244.11	202.791
O60812;A0A0G2JNQ3;A0A0G2JPF8;B2RXH8;B7ZW38;P0DMR1	8	2	45.5287	0.000279993	0.000452142	1.67353	1	CM55	PM54	32199.5	Heterogeneous nuclear ribonucleoprotein C-like 1 OS=Homo sapiens OX=9606 GN=HNRNPCL1 PE=1 SV=1	1674.95	1697.59	1726.12	1038.19	1074.72	933.731
O14559;O14559-11;K7EMC2	6	2	24.6126	0.000283763	0.000454665	1.70785	1	CM55	PM54	138525	Rho GTPase-activating protein 33 OS=Homo sapiens OX=9606 GN=ARHGAP33 PE=1 SV=2	361.868	329.284	338.274	193.537	193.961	215.262
P30041	23	20	146.363	0.000283882	0.000454665	1.83754	1	CM55	PM54	25149.1	Peroxiredoxin-6 OS=Homo sapiens OX=9606 GN=PRDX6 PE=1 SV=3	10967.1	12140.2	12989	6413.59	6524.08	6706.19
Q9Y6U3;Q9Y6U3-2;Q9Y6U3-3;C9JGB6;F8WBX5	6	1	28.8336	0.000293106	0.000467521	2.89262	1	CM55	PM54	80945.2	Adseverin OS=Homo sapiens OX=9606 GN=SCIN PE=1 SV=4	775.223	774.04	768.197	236.261	316.658	248.246
O75369;O75369-2;O75369-8;O75369-9;O75369-3;O75369-6;E7EN95;O75369-7;O75369-4;O75369-5;H7C5L4;A0A0A0MT44;A0A0C4DGA1	77	32	521.052	0.000302322	0.000480261	1.24525	1	CM55	PM54	280331	Filamin-B OS=Homo sapiens OX=9606 GN=FLNB PE=1 SV=2	4559.77	4749.24	4738.18	3710.74	3860.49	3709.38
P09471;P09471-2;H3BTM2	5	1	34.7371	0.000305188	0.000482851	24.9368	1	CM55	PM54	40620.9	Guanine nucleotide-binding protein G(o) subunit alpha OS=Homo sapiens OX=9606 GN=GNAO1 PE=1 SV=4	218.026	143.067	249.153	6.2762	6.12737	12.0681
P49419;A0A1B0GTG2;A0A1B0GUA1;A0A1B0GW77;A0A1B0GW82;P49419-2;A0A0J9YWF7;A0A1B0GTY9;H0YHM6;P49419-4;A0A1B0GTJ4;A0A1B0GV49;A0A1B0GUY0;F8WDY6;A0A1B0GVU0;F8VVF2	6	3	34.389	0.000313179	0.000493496	1.8433	1	CM55	PM54	59057.5	Alpha-aminoadipic semialdehyde dehydrogenase OS=Homo sapiens OX=9606 GN=ALDH7A1 PE=1 SV=5	749.799	894.632	809.741	448.19	433.67	449.539
A0A0A0MTI5;B8ZWD1;P07108;P07108-2;P07108-3;P07108-4;P07108-5;P07108-6	5	3	29.2036	0.000317643	0.000495624	13.8807	1	CM55	PM54	16072.7	Acyl-CoA-binding protein OS=Homo sapiens OX=9606 GN=DBI PE=1 SV=1	457.668	397.66	368.861	41.5452	19.2472	27.401
P30466;A0A140TA02;A0A1W2PNR7;A0A140T9S9;A0A140T9Y5;A0A140TA14;P03989;P30461;P30485;P30487;P30488;A0A140T9G0;A0A140T9H3;A0A140T9Q4;A0A140T9S7;A0A140TA19	7	1	61.4833	0.000317708	0.000495624	18.787	1	CM55	PM54	40560	HLA class I histocompatibility antigen_ B-18 alpha chain OS=Homo sapiens OX=9606 GN=HLA-B PE=1 SV=1	1900.43	1694.37	1609.07	142.016	73.3387	61.6386
P07951-2;A7XZE4	26	2	255.573	0.000318334	0.000495624	2.59934	1	CM55	PM54	33046.9	Isoform 2 of Tropomyosin beta chain OS=Homo sapiens OX=9606 GN=TPM2	944.031	753.607	797.378	306.29	350.545	303.029
Q9ULV4;Q9ULV4-2;Q9ULV4-3;B4E3S0;H0YHL7;F8VRE9;F8VSA4;F8VTT6;F8VUX3;F8VVB7;F8W1H8;F8VV53	16	14	101.902	0.00032301	0.000500909	1.4298	1	PM54	CM55	53933.5	Coronin-1C OS=Homo sapiens OX=9606 GN=CORO1C PE=1 SV=1	4872.25	5243.19	5199.45	7429.59	7465.43	7002.18
P21675;P21675-10;P21675-11;P21675-12;P21675-2;P21675-3;P21675-4;P21675-5;P21675-6;P21675-7;P21675-8;P21675-9	3	1	12.1538	0.000330934	0.000511169	2.19295	1	CM55	PM54	214103	Transcription initiation factor TFIID subunit 1 OS=Homo sapiens OX=9606 GN=TAF1 PE=1 SV=2	11329.7	11817.7	13991	5428.94	5864.25	5642.16
Q8TDB4	1	1	5.6147	0.000336173	0.000517076	10.0403	1	CM55	PM54	25446.6	Protein MGARP OS=Homo sapiens OX=9606 GN=MGARP PE=1 SV=1	2136.98	1990.87	1737.95	268.421	136.732	179.07
Q8N7X0;H0Y334;Q8N7X0-2;H0Y333;E5RGD1	14	4	59.3764	0.000337405	0.000517076	1.56032	1	CM55	PM54	190797	Androglobin OS=Homo sapiens OX=9606 GN=ADGB PE=2 SV=3	1004.25	950.432	946.862	592.89	662.292	604.401
P46940;A0A0J9YXZ5;H0YLE8;A0A087WWP1;H0YKA5;A0A087X225	37	19	274.76	0.000356025	0.000543481	1.26064	1	CM55	PM54	189880	Ras GTPase-activating-like protein IQGAP1 OS=Homo sapiens OX=9606 GN=IQGAP1 PE=1 SV=1	5040.36	4775.65	4981.21	3970.4	3816.22	3951.25
REVERSE26241	7	1	29.2594	0.000359076	0.000546005	1.52017	1	PM54	CM55	152077	Reversed Sequence 26241	502.081	520.612	509.684	732.068	769.555	827.844
O75914-3;B1AKS5;O75914;A0A087X294;O75914-2;O75914-4	3	1	15.6379	0.000372424	0.000563008	1.99948	1	CM55	PM54	64872.4	Isoform 3 of Serine/threonine-protein kinase PAK 3 OS=Homo sapiens OX=9606 GN=PAK3	1341.64	1622.08	1561.48	785.053	727.283	750.848
P61106;X6RFL8	8	2	65.8971	0.000373139	0.000563008	1.55636	1	PM54	CM55	24125.1	Ras-related protein Rab-14 OS=Homo sapiens OX=9606 GN=RAB14 PE=1 SV=4	178.505	189.281	185.417	270.511	284.442	306.028
Q99613;B5ME19;Q99613-2;H3BPE3	3	1	11.0134	0.000382939	0.000574589	1.91135	1	PM54	CM55	106028	Eukaryotic translation initiation factor 3 subunit C OS=Homo sapiens OX=9606 GN=EIF3C PE=1 SV=1	679.612	645.79	624.936	1126.59	1247.31	1353.87
Q9Y4B5;Q9Y4B5-2;Q9Y4B5-3	6	2	28.7671	0.000383755	0.000574589	3.88373	1	CM55	PM54	210781	Microtubule cross-linking factor 1 OS=Homo sapiens OX=9606 GN=MTCL1 PE=1 SV=5	976.919	1173.63	847.673	219.263	284.073	268.658
REVERSE2273	6	2	21.5705	0.000386633	0.000576688	2.36657	1	CM55	PM54	159112	Reversed Sequence 2273	2642.03	2728.95	2860.87	1272.48	1211.18	994.728
A0A0A0MT08;Q68CQ1;Q68CQ1-1;Q68CQ1-9;F8W8P2;Q68CQ1-2;F8WC02;F8WE25;Q68CQ1-8;Q68CQ1-4	5	2	21.289	0.000389834	0.000579251	2.09814	1	PM54	CM55	148699	MROH7-TTC4 readthrough (NMD candidate) OS=Homo sapiens OX=9606 GN=MROH7-TTC4 PE=4 SV=1	232.992	191.589	216.093	416.067	464.708	463.449
Q06830;A0A0A0MSI0;A0A0A0MRQ5	29	19	139.055	0.000392248	0.00058063	1.12066	1	PM54	CM55	22338.5	Peroxiredoxin-1 OS=Homo sapiens OX=9606 GN=PRDX1 PE=1 SV=1	5544.57	5565.56	5674.46	6180.88	6340.37	6288.58
P10301	3	1	19.7066	0.000401692	0.000592366	1.63442	1	CM55	PM54	23651.6	Ras-related protein R-Ras OS=Homo sapiens OX=9606 GN=RRAS PE=1 SV=1	1128.26	997.047	981.174	625.749	631.528	643.391
Q16695;K7EK07;P68431;P84243;Q71DI3;B4DEB1;K7EMV3;K7ES00;Q6NXT2;K7EP01;Q5TEC6	9	9	31.8482	0.000414531	0.000609002	1.37443	1	PM54	CM55	15622.3	Histone H3.1t OS=Homo sapiens OX=9606 GN=HIST3H3 PE=1 SV=3	4015.36	4057.46	4144.99	5298.7	5811.41	5682.46
Q99832;Q99832-3;Q99832-2;Q99832-4;F8WAM2	13	8	82.4789	0.000417155	0.000610561	1.21341	1	CM55	PM54	59880	T-complex protein 1 subunit eta OS=Homo sapiens OX=9606 GN=CCT7 PE=1 SV=2	2539.89	2474.35	2619.27	2077.87	2126.15	2086.94
P27824;P27824-2;P27824-3;D6RGY2;H0Y9Q7;D6RAU8;D6RB85;D6RDP7;D6RFL1;H0Y9H1;D6RAQ8;D6RD16;D6RHJ3	15	8	106.257	0.000425973	0.000621141	1.48379	1	CM55	PM54	68024.6	Calnexin OS=Homo sapiens OX=9606 GN=CANX PE=1 SV=2	4059.32	3848.74	3841.01	2748.1	2694.61	2475.56
P24844;P24844-2;J3KTJ1	25	16	140.957	0.000431092	0.000624021	1.15604	1	CM55	PM54	19884.3	Myosin regulatory light polypeptide 9 OS=Homo sapiens OX=9606 GN=MYL9 PE=1 SV=4	8177.41	8033.99	7900.71	6949.43	7064.78	6843.29
Q9P2D7;Q9P2D7-8;Q9P2D7-6	28	4	119.853	0.000431683	0.000624021	1.4579	1	CM55	PM54	491471	Dynein heavy chain 1_ axonemal OS=Homo sapiens OX=9606 GN=DNAH1 PE=1 SV=5	2444.8	2196.81	2425.99	1636.95	1611.79	1599.06
P05362;E7ESS4	2	1	12.5855	0.000432798	0.000624021	10.3484	1	CM55	PM54	58623.7	Intercellular adhesion molecule 1 OS=Homo sapiens OX=9606 GN=ICAM1 PE=1 SV=2	564.554	692.37	573.568	39.5337	82.4083	54.9438
Q8NG31;Q8NG31-2;H0YCZ2;E9PPJ1;Q8NG31-3;Q8NG31-4	17	3	69.7925	0.000434335	0.000624021	1.73221	1	CM55	PM54	268357	Kinetochore scaffold 1 OS=Homo sapiens OX=9606 GN=KNL1 PE=1 SV=3	732.602	637.587	708.989	378.065	418.209	404.026
Q96DT6;A6NGQ4;H7BZW5	2	1	9.0493	0.00044234	0.000633194	2.79902	1	PM54	CM55	53067.8	Cysteine protease ATG4C OS=Homo sapiens OX=9606 GN=ATG4C PE=1 SV=1	236.96	179.305	231.162	557.836	631.352	622.974
P41250;F8WCK4	20	8	116.042	0.000453367	0.000644328	1.19926	1	PM54	CM55	83907.1	Glycine--tRNA ligase OS=Homo sapiens OX=9606 GN=GARS PE=1 SV=3	2657.32	2615.61	2522.92	3145.52	3135.14	3068.61
Q9UL46;A0A087X1Z3;H0YM70;H0YKU2	4	2	22.2391	0.000453416	0.000644328	2.7106	1	CM55	PM54	27572.8	Proteasome activator complex subunit 2 OS=Homo sapiens OX=9606 GN=PSME2 PE=1 SV=4	943.347	760.331	703.586	279.307	295.714	313.071
P62277;J3KMX5;E9PS50	8	6	49.5919	0.000455803	0.000645374	1.13243	1	PM54	CM55	17222.3	40S ribosomal protein S13 OS=Homo sapiens OX=9606 GN=RPS13 PE=1 SV=2	1872.55	1823.11	1878.72	2105.94	2128.6	2078.03
Q3V6T2;A0A2U3TZV9;Q3V6T2-2;Q3V6T2-3;Q3V6T2-4;Q3V6T2-5;A0A2R8Y7B1;A0A2R8Y4W8;A0A2R8Y4X4;A0A2R8YG73;A0A2R8YGU1;A0A2R8Y820;A0A2R8Y885;A0A2R8YCU9;A0A2R8Y7D4;A0A2R8YDS8;H7C2C6;A0A087WXD9;A0A2R8YG52;H0Y470;A0A2R8Y5D7;A0A2R8Y6B2;A0A2R8Y7D9;H0Y7U8	18	4	84.2267	0.000462859	0.000652998	1.40125	1	CM55	PM54	216726	Girdin OS=Homo sapiens OX=9606 GN=CCDC88A PE=1 SV=2	2520.85	2700.95	2767.19	1901.18	1848.44	1951.72
P17661	12	1	127.007	0.000473975	0.00066516	5.75362	1	CM55	PM54	53592.9	Desmin OS=Homo sapiens OX=9606 GN=DES PE=1 SV=3	279.897	223.588	182.199	39.0123	32.3915	47.7708
REVERSE29996	4	1	16.2665	0.000474884	0.00066516	1.2575	1	CM55	PM54	90982.8	Reversed Sequence 29996	5894.75	5791.48	5942.67	4834.89	4502.18	4681.89
REVERSE22291	2	2	17.1758	0.000480708	0.000669748	1.69745	1	PM54	CM55	159040	Reversed Sequence 22291	390.338	336.524	387.603	628.081	649.636	614.038
P13797;P13797-3;A0A0A0MSQ0;P13797-2;H7C4N2;U3KQI3	22	11	166.894	0.000481587	0.000669748	1.24848	1	CM55	PM54	71324.4	Plastin-3 OS=Homo sapiens OX=9606 GN=PLS3 PE=1 SV=4	3920.99	4130.35	3856.57	3208.19	3177.94	3151.77
P07602;C9JIZ6;P07602-2;P07602-3;A0A0J9YXB8;Q5BJH1	11	9	51.6797	0.000492907	0.000683061	1.26713	1	CM55	PM54	59937.6	Prosaposin OS=Homo sapiens OX=9606 GN=PSAP PE=1 SV=2	4114.65	4133.82	4068.4	3184.96	3149.77	3385.54
Q09MP3	1	1	4.4249	0.000495036	0.000683586	21.8261	1	CM55	PM54	135846	RAD51-associated protein 2 OS=Homo sapiens OX=9606 GN=RAD51AP2 PE=1 SV=1	440.47	497.15	685.04	34.8816	25.6971	13.7661
Q14315;Q14315-2	104	68	727.938	0.000499461	0.000685003	1.2204	1	PM54	CM55	293589	Filamin-C OS=Homo sapiens OX=9606 GN=FLNC PE=1 SV=3	11960.4	11568.8	12219.9	14588.7	14792.2	14247.3
P30085;P30085-2;Q5T0D2	8	6	35.6247	0.000499992	0.000685003	1.22721	1	PM54	CM55	22450.5	UMP-CMP kinase OS=Homo sapiens OX=9606 GN=CMPK1 PE=1 SV=3	1295.89	1330.84	1257.52	1555.86	1617.25	1593.66
REVERSE5992	10	2	46.8391	0.00050132	0.000685003	3.37967	1	CM55	PM54	135664	Reversed Sequence 5992	236.303	260.483	266.898	68.912	64.1431	92.9093
REVERSE28063	9	2	36.1385	0.00050331	0.000685325	13.0749	1	CM55	PM54	159103	Reversed Sequence 28063	578.044	672.436	562.889	52.2671	26.7045	59.7191
Q96RT1;Q96RT1-2;Q96RT1-3;Q96RT1-4;Q96RT1-5;Q96RT1-7;Q96RT1-8;Q96RT1-9;Q96RT1-6;B4DIP2;H0YA04	6	1	27.8331	0.000506407	0.000687148	5.47891	1	CM55	PM54	159040	Erbin OS=Homo sapiens OX=9606 GN=ERBIN PE=1 SV=2	597.629	490.838	474.969	97.8608	117.408	70.0865
REVERSE4418	16	2	68.2542	0.000512153	0.00069254	2.79312	1	CM55	PM54	285338	Reversed Sequence 4418	629.236	614.993	739.039	199.958	261.532	248.565
E9PKH8;P11836;E9PPL6;P11836-2	4	1	19.0628	0.000516224	0.000695638	1.82709	1	CM55	PM54	31894.7	B-lymphocyte antigen CD20 OS=Homo sapiens OX=9606 GN=MS4A1 PE=1 SV=1	2540.17	2458.17	2738.04	1390.15	1300.8	1543.31
Q9NZN4;Q9NZN4-2	12	7	77.6731	0.00051918	0.000695677	1.2157	1	CM55	PM54	61332.6	EH domain-containing protein 2 OS=Homo sapiens OX=9606 GN=EHD2 PE=1 SV=2	1756.14	1712.77	1654.94	1402.61	1385.86	1426.25
P52907	11	4	52.2492	0.000519813	0.000695677	1.43518	1	CM55	PM54	33093.9	F-actin-capping protein subunit alpha-1 OS=Homo sapiens OX=9606 GN=CAPZA1 PE=1 SV=3	2712.53	2517.04	2675.29	1895.08	1739.01	1873.82
Q8TCJ2	3	1	10.3628	0.000524094	0.000697924	14.9266	1	CM55	PM54	94301.8	Dolichyl-diphosphooligosaccharide--protein glycosyltransferase subunit STT3B OS=Homo sapiens OX=9606 GN=STT3B PE=1 SV=1	247.218	123.998	163.353	13.3908	14.1883	8.23411
REVERSE37611	7	1	35.3077	0.000525065	0.000697924	1.21775	1	PM54	CM55	149844	Reversed Sequence 37611	837.826	891.043	855.93	1063.49	1038.51	1045.65
Q9BXL7	5	1	16.545	0.000531934	0.000703262	2.79483	1	PM54	CM55	134596	Caspase recruitment domain-containing protein 11 OS=Homo sapiens OX=9606 GN=CARD11 PE=1 SV=3	344.577	291.568	351.623	976.328	777.102	1007.21
P23284	26	23	111.347	0.0005338	0.000703262	1.38968	1	CM55	PM54	23799.6	Peptidyl-prolyl cis-trans isomerase B OS=Homo sapiens OX=9606 GN=PPIB PE=1 SV=2	13195.4	12763.1	13102.9	8811.08	9539.91	9757.29
P47756;P47756-2;B1AK85;B1AK87;B1AK88	9	9	68.7781	0.000534479	0.000703262	1.21015	1	CM55	PM54	31635.7	F-actin-capping protein subunit beta OS=Homo sapiens OX=9606 GN=CAPZB PE=1 SV=4	2404.39	2555.86	2478.97	2070.38	2052.45	2024.53
Q9H792;H0YN99;H3BUZ5	11	1	44.265	0.000537983	0.000705497	3.38458	1	CM55	PM54	195160	Inactive tyrosine-protein kinase PEAK1 OS=Homo sapiens OX=9606 GN=PEAK1 PE=1 SV=4	609.146	508.549	614.445	204.705	164.031	143.038
P16615;P16615-2;P16615-3;P16615-5;P16615-4;H7C5W9;A0A0C4DH86;H3BTW4	15	3	91.5191	0.000544487	0.000711638	1.50935	1	CM55	PM54	116411	Sarcoplasmic/endoplasmic reticulum calcium ATPase 2 OS=Homo sapiens OX=9606 GN=ATP2A2 PE=1 SV=1	1695.26	1901.87	1735.33	1198.29	1129.52	1205.13
Q6NV74;C9JFM2;C9JK00;C9JXD6	4	2	18.4615	0.000548485	0.000714474	1.77528	1	PM54	CM55	102728	Uncharacterized protein KIAA1211-like OS=Homo sapiens OX=9606 GN=KIAA1211L PE=1 SV=3	753.121	906.873	789.813	1420.51	1487.11	1441.48
Q6S8J3;A5A3E0;A0A087X067;A6NC16;Q6S8J3-2;Q6S8J3-3	53	25	245.872	0.000554122	0.000715592	1.14328	1	PM54	CM55	122961	POTE ankyrin domain family member E OS=Homo sapiens OX=9606 GN=POTEE PE=2 SV=3	14157.1	14377.8	14285.4	16317.6	15964.2	16673.6
P62424;Q5T8U2;Q5T8U3	13	10	82.5176	0.000555196	0.000715592	1.31357	1	PM54	CM55	30166.7	60S ribosomal protein L7a OS=Homo sapiens OX=9606 GN=RPL7A PE=1 SV=2	1174.47	1262.03	1159.85	1552.92	1590.03	1581.11
REVERSE9169	4	1	18.836	0.000559516	0.000715592	3.49566	1	PM54	CM55	101538	Reversed Sequence 9169	184.678	122.051	150.044	503.953	517.275	575.492
P07339;A0A1B0GV23;A0A1B0GVD5;A0A1B0GVP3;A0A1B0GW44;A0A1B0GWE8;A0A1B0GU03;A0A1B0GU92;C9JH19;F8WD96;H7C469;F8W787;H7C1V0;A0A1B0GV01	9	6	53.119	0.000560289	0.000715592	1.46232	1	CM55	PM54	45065.5	Cathepsin D OS=Homo sapiens OX=9606 GN=CTSD PE=1 SV=1	1966.65	2099.6	1949.95	1444.71	1302.27	1367.16
REVERSE26763	11	1	47.2691	0.000560588	0.000715592	1.76971	1	PM54	CM55	205317	Reversed Sequence 26763	152.519	183.585	158.471	292.305	286.528	296.422
P36957;Q86SW4;G3V3F0;G3V5M3;H0YJF9;P36957-2	3	3	22.5272	0.000561881	0.000715592	1.36508	1	CM55	PM54	49097.6	Dihydrolipoyllysine-residue succinyltransferase component of 2-oxoglutarate dehydrogenase complex_ mitochondrial OS=Homo sapiens OX=9606 GN=DLST PE=1 SV=4	2512.13	2375.53	2437.74	1836.17	1694.72	1835.38
P80723;P80723-2	5	3	31.0814	0.000562161	0.000715592	1.54351	1	PM54	CM55	22693.4	Brain acid soluble protein 1 OS=Homo sapiens OX=9606 GN=BASP1 PE=1 SV=2	1889.25	1711.54	1735.48	2598.05	2887.38	2751.14
Q01105;A0A087X027;A0A0C4DFV9;P0DME0;Q01105-2;Q01105-3;Q01105-4	3	3	13.9786	0.000564519	0.00071626	1.32601	1	CM55	PM54	33488.9	Protein SET OS=Homo sapiens OX=9606 GN=SET PE=1 SV=3	2101.06	2197.1	2090.72	1539.48	1609	1669.66
P61981	13	5	80.9075	0.000567399	0.000717059	1.19701	1	CM55	PM54	28473.7	14-3-3 protein gamma OS=Homo sapiens OX=9606 GN=YWHAG PE=1 SV=2	5581.25	5357.77	5578.8	4639.82	4667.24	4492.16
P52179;P52179-2;A8MX12	5	1	19.6247	0.000568818	0.000717059	2.92604	1	PM54	CM55	189109	Myomesin-1 OS=Homo sapiens OX=9606 GN=MYOM1 PE=1 SV=2	467.778	639.289	656.329	1723.47	1707.01	1729.3
F8VPD4;P27708	10	2	45.4422	0.000571213	0.000717763	1.49825	1	CM55	PM54	238247	CAD protein OS=Homo sapiens OX=9606 GN=CAD PE=1 SV=1	5071.18	5362.19	5409.39	3727.67	3300.68	3545.84
REVERSE21792	2	1	8.8647	0.000574865	0.000720036	1.70369	1	CM55	PM54	70398.5	Reversed Sequence 21792	2731.58	2358.42	2503.08	1401.86	1567.8	1487.17
Q14247;Q14247-3;Q14247-2;H0YCD9;H0YEV2	12	5	66.5455	0.00057824	0.000721949	1.62807	1	CM55	PM54	61757.3	Src substrate cortactin OS=Homo sapiens OX=9606 GN=CTTN PE=1 SV=2	2896.6	2585.53	2658.04	1568.44	1659.59	1771.85
P08648;H0YIV7	9	5	45.3435	0.000586761	0.000730255	1.52774	0.999999	CM55	PM54	115677	Integrin alpha-5 OS=Homo sapiens OX=9606 GN=ITGA5 PE=1 SV=2	733.522	756.253	679.69	499.38	452.828	467.839
Q9UBC2;M0R165;Q9UBC2-2;Q9UBC2-3;Q9UBC2-4;M0R2S2	5	1	21.8837	0.000596359	0.000731632	1.49877	0.999999	CM55	PM54	94369.3	Epidermal growth factor receptor substrate 15-like 1 OS=Homo sapiens OX=9606 GN=EPS15L1 PE=1 SV=1	3257.27	3122.77	3122.25	1956.13	2222.2	2161.74
P13861;P13861-2;C9J830;H7C330	4	1	21.451	0.000596894	0.000731632	16.92	0.999999	CM55	PM54	45860.6	cAMP-dependent protein kinase type II-alpha regulatory subunit OS=Homo sapiens OX=9606 GN=PRKAR2A PE=1 SV=2	84.9891	66.6411	150.104	5.06763	7.84209	4.92323
REVERSE39368	5	3	20.3781	0.000596951	0.000731632	2.00833	0.999999	CM55	PM54	278537	Reversed Sequence 39368	593.307	544.517	643.134	313.228	307.778	265.781
A0A096LPJ4;P05161;A0A096LNZ9	3	2	14.6248	0.000600793	0.000731632	45.8489	0.999999	CM55	PM54	17013.4	Ubiquitin-like protein ISG15 OS=Homo sapiens OX=9606 GN=ISG15 PE=1 SV=1	824.87	629.394	240.965	11.5229	11.8442	13.6071
REVERSE18911	1	1	4.9002	0.000602194	0.000731632	5.3266	0.999999	CM55	PM54	60716.9	Reversed Sequence 18911	425.695	678.257	566.641	110.378	84.8151	118.44
Q96RY7;Q96RY7-2	11	2	66.3688	0.000602853	0.000731632	1.26051	0.999999	CM55	PM54	166961	Intraflagellar transport protein 140 homolog OS=Homo sapiens OX=9606 GN=IFT140 PE=1 SV=1	8749.08	8610.02	8812.02	7214.96	6869.66	6677.62
REVERSE19087	6	2	27.3746	0.000603004	0.000731632	1.41099	0.999999	CM55	PM54	194858	Reversed Sequence 19087	2112.13	2178.55	2325.09	1611.46	1574.86	1502.43
Q0VDD8	26	1	120.894	0.000603433	0.000731632	5.35331	0.999999	CM55	PM54	404172	Dynein heavy chain 14_ axonemal OS=Homo sapiens OX=9606 GN=DNAH14 PE=2 SV=3	435.224	395.407	495.705	83.6267	104.115	60.0181
Q8WX93;Q8WX93-5;Q8WX93-2;Q8WX93-9;Q8WX93-3;Q8WX93-8;Q8WX93-4;Q8WX93-7;H0YA05;F8WA26	14	3	88.4795	0.000604717	0.000731632	2.16018	0.999999	PM54	CM55	151933	Palladin OS=Homo sapiens OX=9606 GN=PALLD PE=1 SV=3	267.706	247.279	206.997	525.832	535.407	498.369
Q14697;Q14697-2;F5H6X6;E9PKU7;E9PNH1	19	12	118.893	0.000611154	0.000737138	1.42185	0.999999	CM55	PM54	107330	Neutral alpha-glucosidase AB OS=Homo sapiens OX=9606 GN=GANAB PE=1 SV=3	2886.1	2839.48	2614.2	2029.01	1921.21	1915.24
K7EIJ8;Q8IYT4;Q8IYT4-2;K7EM02	2	1	9.2566	0.000615304	0.00073986	1.37649	0.999999	CM55	PM54	38237.7	Katanin p60 ATPase-containing subunit A-like 2 (Fragment) OS=Homo sapiens OX=9606 GN=KATNAL2 PE=1 SV=1	1308.68	1282.33	1375.44	927.065	946.287	1008.22
Q13740;Q13740-2;F5GXJ9;H7C543;Q13740-4;Q13740-3	10	5	62.0452	0.000622602	0.000746338	1.55668	0.999999	CM55	PM54	65786.7	CD166 antigen OS=Homo sapiens OX=9606 GN=ALCAM PE=1 SV=2	2453.35	2345.9	2608.78	1605.98	1487.08	1665.82
B7Z4C8;B7Z4E3;B8ZZK4;C9JU56;H7C2W9;P62899;P62899-2;P62899-3	1	1	12.338	0.000634212	0.000757931	10.6595	0.999999	PM54	CM55	15175.6	cDNA FLJ57527_ highly similar to 60S ribosomal protein L31 OS=Homo sapiens OX=9606 GN=RPL31 PE=1 SV=1	11.7586	6.47697	15.0951	116.765	116.742	121.782
P05141;V9GYG0	12	3	63.3804	0.00065259	0.000777517	1.66146	0.999999	PM54	CM55	33080.4	ADP/ATP translocase 2 OS=Homo sapiens OX=9606 GN=SLC25A5 PE=1 SV=7	503.382	527.437	467.833	767.168	848.485	874.298
Q03135;C9JKI3;E9PCT5;Q03135-2;P56539	6	4	49.9194	0.000657885	0.000781443	1.23205	0.999999	CM55	PM54	20642.7	Caveolin-1 OS=Homo sapiens OX=9606 GN=CAV1 PE=1 SV=4	6146.51	6202.93	5927.49	4787.4	4981.71	5065.45
P31949	9	8	65.0784	0.000665449	0.000787883	1.28837	0.999999	PM54	CM55	11854.5	Protein S100-A11 OS=Homo sapiens OX=9606 GN=S100A11 PE=1 SV=2	13260.4	12318.9	12327.1	16504.7	15952.9	16379.9
REVERSE14332	9	2	44.8857	0.000670108	0.000787883	1.76207	0.999998	PM54	CM55	282128	Reversed Sequence 14332	936.137	1092.78	1026.51	1788.25	1918.27	1677.35
Q9NZB2;Q9NZB2-4;Q9NZB2-6;A0A0C4DG79;A0A0C4DH52;Q9NZB2-5	5	1	20.2816	0.000670446	0.000787883	13.2443	0.999998	CM55	PM54	123085	Constitutive coactivator of PPAR-gamma-like protein 1 OS=Homo sapiens OX=9606 GN=FAM120A PE=1 SV=2	1194.55	1618.52	1501.69	62.7061	109.775	153.302
P42858	6	1	26.7164	0.000671929	0.000787883	23.1657	0.999998	PM54	CM55	351596	Huntingtin OS=Homo sapiens OX=9606 GN=HTT PE=1 SV=2	16.4418	17.9269	6.2298	315.072	292.031	333.39
Q04760	2	2	0	0.000673777	0.000787883	2.99805	0.999998	PM54	CM55	21005.9	Lactoylglutathione lyase OS=Homo sapiens OX=9606 GN=GLO1 PE=1 SV=4	146.406	114.49	100.531	339.908	357.768	385.899
Q15046;Q15046-2	3	1	15.2562	0.000675404	0.000787883	1.57651	0.999998	PM54	CM55	68504.4	Lysine--tRNA ligase OS=Homo sapiens OX=9606 GN=KARS PE=1 SV=3	1530.99	1638	1660.82	2400.03	2471.74	2742.44
Q5T1B0;B1AM31;A6H900;D6R9B7	12	1	52.3441	0.000684143	0.000795702	17.5051	0.999998	CM55	PM54	118711	Axonemal dynein light chain domain-containing protein 1 OS=Homo sapiens OX=9606 GN=AXDND1 PE=2 SV=1	619.967	490.957	402.318	42.6688	16.1369	27.6401
P51991;P51991-2;H7C1J8	11	5	75.6922	0.000692126	0.000802598	1.44691	0.999998	CM55	PM54	39823.1	Heterogeneous nuclear ribonucleoprotein A3 OS=Homo sapiens OX=9606 GN=HNRNPA3 PE=1 SV=2	1100.59	1050.89	1186.04	794.004	759.784	752.878
REVERSE41743	4	1	17.0231	0.000706118	0.000816402	27.1523	0.999998	CM55	PM54	166369	Reversed Sequence 41743	168.239	99.4461	198.007	3.47976	4.46844	9.20289
O00567;H0Y653;H0YDU4;Q5JXT2	8	1	39.2739	0.00071095	0.000818033	2.7688	0.999998	CM55	PM54	66449.2	Nucleolar protein 56 OS=Homo sapiens OX=9606 GN=NOP56 PE=1 SV=4	713.048	645.844	679.897	273.102	266.501	196.741
P05060	5	1	22.76	0.000711716	0.000818033	3.1211	0.999998	PM54	CM55	78390.4	Secretogranin-1 OS=Homo sapiens OX=9606 GN=CHGB PE=1 SV=2	152.147	121.316	127.749	339.172	453.404	459.645
Q9UQ35;Q9UQ35-2;A0A087X1W1;I3L182;I3L1C0;I3L1I8;I3L4D8;Q9UQ35-3	16	1	77.7067	0.000714136	0.000818408	4.06973	0.999997	PM54	CM55	300357	Serine/arginine repetitive matrix protein 2 OS=Homo sapiens OX=9606 GN=SRRM2 PE=1 SV=2	231.717	164.964	151.686	687.893	861.951	681.861
P04075;P04075-2;H3BQN4;J3KPS3;H3BPS8;H3BUH7;H3BR04;H3BU78;H3BMQ8;H3BR68	46	35	228.263	0.000718673	0.000821199	1.36089	0.999997	CM55	PM54	39876.3	Fructose-bisphosphate aldolase A OS=Homo sapiens OX=9606 GN=ALDOA PE=1 SV=2	19339.8	18699.3	19578.5	13443.9	13994.9	14899.4
Q15018	3	1	14.872	0.000721973	0.000822564	1.62493	0.999997	PM54	CM55	47129	BRISC complex subunit Abraxas 2 OS=Homo sapiens OX=9606 GN=ABRAXAS2 PE=1 SV=2	832.45	945.656	923.883	1509.71	1366.01	1514.83
REVERSE3070	1	1	4.0124	0.000730361	0.000827752	2.25056	0.999997	CM55	PM54	154997	Reversed Sequence 3070	2145.96	1958.79	1897.57	1029.61	790.286	847.133
P68363;P68363-2;F8VVB9;C9JDS9;F8VRZ4;F8VS66;F8VWV9;F8VX09;C9K0S6;F8VRK0;F8VXZ7	52	25	277.762	0.000730763	0.000827752	1.14127	0.999997	CM55	PM54	50836	Tubulin alpha-1B chain OS=Homo sapiens OX=9606 GN=TUBA1B PE=1 SV=1	48701.6	48157.4	49547.3	41841.5	43511.1	42931
REVERSE27576	3	1	12.218	0.000738796	0.000834433	1.48721	0.999997	CM55	PM54	108643	Reversed Sequence 27576	378.82	390.216	348.28	240.248	262.285	248.749
P14174	5	5	23.9255	0.000746309	0.00083954	1.3015	0.999997	CM55	PM54	12647.4	Macrophage migration inhibitory factor OS=Homo sapiens OX=9606 GN=MIF PE=1 SV=4	7142.33	6585.05	7150.78	5369.79	5402.22	5269.64
REVERSE9370	6	1	25.5247	0.000747803	0.00083954	2.84769	0.999996	CM55	PM54	198022	Reversed Sequence 9370	381.556	270.035	283.283	112.088	112.597	103.607
Q8IWE2;Q8IWE2-2	11	4	62.5412	0.000750499	0.00083954	1.31123	0.999996	CM55	PM54	61084	Protein NOXP20 OS=Homo sapiens OX=9606 GN=FAM114A1 PE=1 SV=2	1134.08	1174.59	1235.45	886.63	887.592	928.673
P61009	2	1	10.7554	0.000753082	0.00083954	1.40006	0.999996	CM55	PM54	20370.5	Signal peptidase complex subunit 3 OS=Homo sapiens OX=9606 GN=SPCS3 PE=1 SV=1	940.26	900.661	1006.15	698.05	659.334	676.153
H7C0L0;P49619;P49619-2;P49619-3	2	1	9.0894	0.000756117	0.00083954	6.34912	0.999996	PM54	CM55	18682.3	Diacylglycerol kinase gamma (Fragment) OS=Homo sapiens OX=9606 GN=DGKG PE=1 SV=1	44.2821	33.0523	62.6296	250.248	329.721	308.68
P46977;P46977-2;A0A0C4DH80;E9PI32;E9PN73	4	4	18.8381	0.000756208	0.00083954	1.4626	0.999996	CM55	PM54	81157.1	Dolichyl-diphosphooligosaccharide--protein glycosyltransferase subunit STT3A OS=Homo sapiens OX=9606 GN=STT3A PE=1 SV=2	911.001	880.129	801.391	587.796	577.81	606.943
P31943;E9PCY7;G8JLB6;H0YB39;D6RBM0;E5RGV0;E7EN40;D6RIU0;H0YBD7;H0YBG7;D6R9D3;D6R9T0;D6RAM1;D6RDL0;D6RDU3;D6RF17;D6RFM3;D6RIH9;D6RIT2;D6RJ04;E7EQJ0	7	1	42.1301	0.000766584	0.000848649	1.46102	0.999996	CM55	PM54	49514.7	Heterogeneous nuclear ribonucleoprotein H OS=Homo sapiens OX=9606 GN=HNRNPH1 PE=1 SV=4	4948.72	4796.63	4798.48	3426.59	3059.62	3468.33
A0AUZ9;A0AUZ9-2	3	2	13.4328	0.000777583	0.000858394	1.91066	0.999995	CM55	PM54	113337	KAT8 regulatory NSL complex subunit 1-like protein OS=Homo sapiens OX=9606 GN=KANSL1L PE=1 SV=2	1029.3	989.828	1099.26	476.989	579.532	575.578
REVERSE2366	5	2	26.7396	0.000780165	0.000858818	4.01029	0.999995	CM55	PM54	93672.2	Reversed Sequence 2366	479.318	393.551	433.385	118.311	126.993	80.4218
REVERSE12444	3	1	17.4824	0.000789021	0.000866127	4.07885	0.999995	CM55	PM54	109166	Reversed Sequence 12444	3319.05	2554.6	2145.55	559.335	656.836	749.875
E7EU49;E9PG37;Q9NR81;Q9NR81-2;Q9NR81-3;Q9NR81-4	1	1	3.4059	0.000796551	0.000871943	1.7788	0.999994	PM54	CM55	57432.5	Rho guanine nucleotide exchange factor 3 OS=Homo sapiens OX=9606 GN=ARHGEF3 PE=1 SV=1	947.568	940.417	905.987	1702.45	1467.04	1800.42
P62753;A2A3R5;A2A3R7	10	4	63.7105	0.000811114	0.000883782	1.21229	0.999994	CM55	PM54	28851.8	40S ribosomal protein S6 OS=Homo sapiens OX=9606 GN=RPS6 PE=1 SV=1	4573.48	4356.48	4279.31	3582.71	3671.71	3641.74
Q9NYL2;D4Q8H0;Q9NYL2-2	5	1	25.1536	0.00081437	0.000883782	1.34094	0.999994	CM55	PM54	91782.5	Mitogen-activated protein kinase kinase kinase 20 OS=Homo sapiens OX=9606 GN=MAP3K20 PE=1 SV=3	1600.15	1653.75	1769.6	1231.61	1234.13	1280.52
P13994;K7ELI4	2	1	9.1529	0.000816113	0.000883782	2.40219	0.999993	CM55	PM54	45258.6	Coiled-coil domain-containing protein 130 OS=Homo sapiens OX=9606 GN=CCDC130 PE=1 SV=2	205.485	183.105	209.882	95.2616	83.4518	70.4229
Q01995;H0YCU9;E9PJ32	52	36	277.526	0.000816412	0.000883782	1.13885	0.999993	PM54	CM55	22668	Transgelin OS=Homo sapiens OX=9606 GN=TAGLN PE=1 SV=4	30540.7	31156.4	31765.7	35986.6	34917.9	35535.6
Q14764;H3BQK6;H3BRL2;H3BNF6;H3BUK7;H3BP76	22	9	149.618	0.000821552	0.000886889	1.18887	0.999993	CM55	PM54	99612.1	Major vault protein OS=Homo sapiens OX=9606 GN=MVP PE=1 SV=4	2202.89	2157.06	2152.98	1848	1763.08	1867.16
REVERSE26248	10	1	49.5001	0.000837163	0.000900357	7.598	0.999992	PM54	CM55	184615	Reversed Sequence 26248	22.3119	25.6674	15.7833	130.592	220.36	133.516
P61204;P84077;F5H423;F5H0C7;P61204-2;H0YGG7	9	4	73.1314	0.000838635	0.000900357	1.41566	0.999992	CM55	PM54	20657.8	ADP-ribosylation factor 3 OS=Homo sapiens OX=9606 GN=ARF3 PE=1 SV=2	6824.62	6745.32	6393.63	4984.88	4448.17	4668.92
Q9UJU6;Q9UJU6-2;Q9UJU6-3;B4DDD6;H0Y5J4;Q9UJU6-5;Q9UJU6-4;Q9UJU6-6;F8WBG8;F8WBB2;F8WC20;F8WFE1	10	6	62.4568	0.000842948	0.000902508	1.43718	0.999992	CM55	PM54	48492.5	Drebrin-like protein OS=Homo sapiens OX=9606 GN=DBNL PE=1 SV=1	1071.33	938.942	993.86	687.127	714.023	689.145
REVERSE16967	1	1	9.2214	0.000860467	0.000910959	2.21518	0.999991	CM55	PM54	143808	Reversed Sequence 16967	1838.12	1463.85	1604.14	827.544	686.801	700.421
A0A087WSW9;A0A087WSY9;A0A182DWI3;E9PIR7;F8W809;Q16881;Q16881-2;Q16881-3;Q16881-4;Q16881-5;Q16881-6;E2QRB9;Q16881-7;E9PKD3;A0A0B4J225;E9PIZ5;E9PKI4;E9PLT3;A0A096LPK7;E9PQI3	13	6	102.207	0.000861488	0.000910959	1.21862	0.999991	PM54	CM55	60820.4	Thioredoxin reductase 1_ cytoplasmic OS=Homo sapiens OX=9606 GN=TXNRD1 PE=1 SV=1	3362.36	3168.91	3393.93	3989.33	4059.43	4046.25
REVERSE10865	2	1	8.274	0.0008629	0.000910959	2.5998	0.999991	CM55	PM54	87982.5	Reversed Sequence 10865	1537.87	1278.76	1590.67	481.751	640.279	573.217
P12111;P12111-2;E7ENL6;P12111-4;P12111-3;P12111-5;C9JNG9	18	2	76.3332	0.000863122	0.000910959	2.84473	0.99999	PM54	CM55	345381	Collagen alpha-3(VI) chain OS=Homo sapiens OX=9606 GN=COL6A3 PE=1 SV=5	163.908	193.653	227.441	486.93	618.777	558.466
REVERSE16175	3	2	10.0133	0.000863368	0.000910959	1.44383	0.99999	CM55	PM54	111564	Reversed Sequence 16175	6898.67	7381.37	6623.65	5037.79	4838.13	4601.98
Q8WXG1	4	1	18.0433	0.000864828	0.000910959	2.7764	0.99999	PM54	CM55	42797.1	Radical S-adenosyl methionine domain-containing protein 2 OS=Homo sapiens OX=9606 GN=RSAD2 PE=1 SV=1	135.319	168.206	173.129	438.412	378.973	506.001
H0YKT8;H0YL69;H0YMA1;H0YMZ1;H0YN18;P25789;H0YLC2;H0YLS6;H0YMI6;H0YKS0;P25789-2	3	1	19.9299	0.000871293	0.000915301	1.72556	0.99999	CM55	PM54	20247.2	Proteasome subunit beta type (Fragment) OS=Homo sapiens OX=9606 GN=PSMA4 PE=1 SV=8	764.384	837.191	851.858	481.233	511.302	429.278
P61088;F8VQQ8;F8VSD4;F8VV71;F8VZ29;Q5JXB2	3	2	21.2037	0.000883687	0.000925832	1.34973	0.999989	CM55	PM54	17194.9	Ubiquitin-conjugating enzyme E2 N OS=Homo sapiens OX=9606 GN=UBE2N PE=1 SV=1	3117.7	2853.55	3146.7	2211.5	2307.08	2236.78
O00299	12	9	81.452	0.000887168	0.000926994	1.42716	0.999989	CM55	PM54	27264.9	Chloride intracellular channel protein 1 OS=Homo sapiens OX=9606 GN=CLIC1 PE=1 SV=4	14111.4	14528.1	15636.8	9914.87	10272.3	10836.8
P13987;A0A2U3TZL5;E9PNW4;E9PR17;H0YET2	11	11	32.0967	0.000926893	0.000965921	1.56102	0.999985	PM54	CM55	14804.6	CD59 glycoprotein OS=Homo sapiens OX=9606 GN=CD59 PE=1 SV=1	3608.53	3915.88	3442.6	5366.5	5715.82	6037.38
Q99961;M0QYE0;M0R0I3;Q99961-2;Q99961-3	5	1	31.7122	0.000932099	0.000968762	1.63554	0.999984	CM55	PM54	41718.1	Endophilin-A2 OS=Homo sapiens OX=9606 GN=SH3GL1 PE=1 SV=1	1512.92	1488.34	1287.2	894.53	836.033	891.484
P22626;P22626-2;A0A087WUI2	10	6	66.6212	0.00093859	0.000972921	1.23175	0.999984	CM55	PM54	37486.8	Heterogeneous nuclear ribonucleoproteins A2/B1 OS=Homo sapiens OX=9606 GN=HNRNPA2B1 PE=1 SV=2	8064.41	7943.1	8522.86	6552.9	6587.42	6774.67
Q99536;Q99536-3;Q99536-2;K7ERT7;K7ESA3;K7EJM4;K7EM19;K7ENX2;K7ER81	10	7	65.9742	0.00094969	0.000981822	1.38238	0.999982	PM54	CM55	42148.5	Synaptic vesicle membrane protein VAT-1 homolog OS=Homo sapiens OX=9606 GN=VAT1 PE=1 SV=2	1646.33	1545.67	1671.19	2318.76	2116.99	2287.01
O00291;O00291-3;O00291-4	1	1	3.6303	0.000956874	0.00098664	9.06979	0.999981	CM55	PM54	117305	Huntingtin-interacting protein 1 OS=Homo sapiens OX=9606 GN=HIP1 PE=1 SV=5	244.453	368.201	333.236	25.2384	51.6555	27.3962
P30086	9	9	51.5405	0.000964822	0.000992217	1.20714	0.99998	CM55	PM54	21170.9	Phosphatidylethanolamine-binding protein 1 OS=Homo sapiens OX=9606 GN=PEBP1 PE=1 SV=3	7842.77	7634.17	7707.96	6594.11	6454.46	6157.85
Q12965	2	1	9.0938	0.000971961	0.000996213	2.36	0.99998	CM55	PM54	127632	Unconventional myosin-Ie OS=Homo sapiens OX=9606 GN=MYO1E PE=1 SV=2	566.622	538.243	544.17	252.861	256.498	189.386
Q8TE49;Q8TE49-2;H0YN66	6	1	35.1135	0.000974082	0.000996213	2.09245	0.999979	CM55	PM54	101589	OTU domain-containing protein 7A OS=Homo sapiens OX=9606 GN=OTUD7A PE=1 SV=1	781.403	885.165	929.959	381.11	388.42	471.371
P20337;O95716;P20336;Q96E17;S4R3Q3	5	2	46.9085	0.000978676	0.000996213	2.17498	0.999979	PM54	CM55	24986.1	Ras-related protein Rab-3B OS=Homo sapiens OX=9606 GN=RAB3B PE=1 SV=2	282.369	315.759	272.575	609.258	726.393	558.111
P62979;A0A2R8Y422	7	2	87.0145	0.000978905	0.000996213	1.25387	0.999979	CM55	PM54	18307.1	Ubiquitin-40S ribosomal protein S27a OS=Homo sapiens OX=9606 GN=RPS27A PE=1 SV=2	17965.2	16606.4	17529	13635.7	14175.2	13740.8
REVERSE41585	3	1	17.1537	0.000983465	0.000998206	1.92719	0.999978	CM55	PM54	159923	Reversed Sequence 41585	1087.94	962.082	1132.25	611.108	500.847	539.294
Q9H361	3	1	18.3148	0.0009884	0.000998206	1.89251	0.999977	CM55	PM54	70259.2	Polyadenylate-binding protein 3 OS=Homo sapiens OX=9606 GN=PABPC3 PE=1 SV=2	1343.2	1449.04	1440.68	785.927	645.197	805.549
A0A087X0D8;Q5JTN6;A0A087X0J1	2	1	7.101	0.000988526	0.000998206	4.51694	0.999977	CM55	PM54	35067.5	WD repeat-containing protein 38 OS=Homo sapiens OX=9606 GN=WDR38 PE=4 SV=1	255.466	156.542	196.233	36.7512	51.6399	46.2664
Q9NR31;D6RAA2;D6RD69;D6RDB2;Q5SQT8;Q9Y6B6;X1WI22	3	2	14.5052	0.000992851	0.000999541	2.74376	0.999977	PM54	CM55	22480.9	GTP-binding protein SAR1a OS=Homo sapiens OX=9606 GN=SAR1A PE=1 SV=1	120.559	128.295	169.997	371.15	355.144	422.931
G8JLD3;Q8IUD2;Q8IUD2-2;Q8IUD2-3;Q8IUD2-5;X6RLX0;Q8IUD2-4;X6RM00;A0A0U1RQN0;K7EPD6	7	1	30.2512	0.000997982	0.000999541	1.28573	0.999976	CM55	PM54	124991	ELKS/Rab6-interacting/CAST family member 1 OS=Homo sapiens OX=9606 GN=ERC1 PE=1 SV=1	17473.9	18882.1	18116	14335.6	13602.4	14428.6
O00443;A0A0C4DGF9;O00443-2;E9PPP3	5	2	22.84	0.000998241	0.000999541	2.47448	0.999976	CM55	PM54	192277	Phosphatidylinositol 4-phosphate 3-kinase C2 domain-containing subunit alpha OS=Homo sapiens OX=9606 GN=PIK3C2A PE=1 SV=2	726.953	831.344	859.72	289.425	299.554	388.202
REVERSE26205	1	1	3.588	0.00100008	0.000999541	2.54596	0.999976	CM55	PM54	78724.7	Reversed Sequence 26205	424.363	312.863	336.521	126.184	153.194	142.367
Q3L8U1;Q3L8U1-2;Q3L8U1-3;H3BTW3;H3BRU9;H3BSP3	18	1	75.3453	0.0010131	0.00100998	1.46434	0.999974	PM54	CM55	328189	Chromodomain-helicase-DNA-binding protein 9 OS=Homo sapiens OX=9606 GN=CHD9 PE=1 SV=2	122.821	133.656	133.407	179.505	202.271	189.145
O15417;H9KVB4;O15417-2;H7C0N9;H7BXS9	10	2	49.287	0.0010163	0.00101059	19.5353	0.999973	PM54	CM55	316173	Trinucleotide repeat-containing gene 18 protein OS=Homo sapiens OX=9606 GN=TNRC18 PE=1 SV=3	38.4526	38.2401	13.0409	564.841	590.015	598.119
P06703;R4GN98;REVERSE12701	13	9	45.6102	0.00102372	0.00101538	1.15984	0.999972	PM54	CM55	10236.8	Protein S100-A6 OS=Homo sapiens OX=9606 GN=S100A6 PE=1 SV=1	8747.09	8600.95	8661.92	9742.19	10307.4	10117.8
REVERSE6274	2	1	7.6798	0.00103486	0.00102383	15.3188	0.99997	CM55	PM54	105047	Reversed Sequence 6274	378.392	570.135	380.883	39.7444	14.9102	32.1285
P60981;F6RFD5;P60981-2	13	9	86.3656	0.0010526	0.00103663	1.26001	0.999967	CM55	PM54	18962	Destrin OS=Homo sapiens OX=9606 GN=DSTN PE=1 SV=3	2258.77	2338.81	2202.63	1866.23	1735.77	1794.93
A0A0B4J239;F5GXX5;F5H895;P61803	1	1	7.5846	0.00105436	0.00103663	1.30287	0.999966	CM55	PM54	8642.09	Dolichyl-diphosphooligosaccharide--protein glycosyltransferase subunit DAD1 OS=Homo sapiens OX=9606 GN=DAD1 PE=1 SV=1	2644.34	2822.75	2636.27	2031.31	2164.3	2024.02
A0A286YF22;O43175;A0A2C9F2M7;A0A286YFA2;A0A286YER3;A0A286YFB2;A0A286YFC8;A0A286YFL2;A0A286YFM8;A0A286YF34;A0A286YFF3;A0A286YFK5	6	3	35.3125	0.00105575	0.00103663	4.68233	0.999966	PM54	CM55	56680.1	D-3-phosphoglycerate dehydrogenase OS=Homo sapiens OX=9606 GN=PHGDH PE=1 SV=1	58.2052	86.0051	57.9767	322.012	245.545	379.15
P15311;E7EQR4	24	7	132.18	0.00106224	0.00104038	1.21026	0.999965	PM54	CM55	69527	Ezrin OS=Homo sapiens OX=9606 GN=EZR PE=1 SV=4	2289.69	2409.44	2385.8	2944.24	2784.59	2845.8
H0Y786;H7BZD5;H0Y3P5	30	4	141.031	0.00107755	0.00105274	2.24701	0.999962	PM54	CM55	350266	Nebulin (Fragment) OS=Homo sapiens OX=9606 GN=NEB PE=1 SV=1	860.651	739.304	1023.68	1992.68	1876.45	2026.2
P08195;F5GZS6;J3KPF3;P08195-2;P08195-3;P08195-4;F5GZI0;F5H0E2	5	1	24.8379	0.00108864	0.00106092	1.48437	0.999959	PM54	CM55	68222.2	4F2 cell-surface antigen heavy chain OS=Homo sapiens OX=9606 GN=SLC3A2 PE=1 SV=3	331.966	339.177	342.418	519.721	456.9	527.877
P17812;P17812-2	13	4	76.2134	0.00110287	0.00107212	2.33489	0.999956	PM54	CM55	67374.8	CTP synthase 1 OS=Homo sapiens OX=9606 GN=CTPS1 PE=1 SV=2	79.106	70.4904	99.1717	191.606	201.095	188.146
P30048;P30048-2	4	2	24.3824	0.00112418	0.00108892	1.4428	0.999951	CM55	PM54	28034.8	Thioredoxin-dependent peroxide reductase_ mitochondrial OS=Homo sapiens OX=9606 GN=PRDX3 PE=1 SV=3	599.42	650.446	629.687	404.814	438.277	459.616
P40926;P40926-2;G3XAL0	21	15	111.471	0.00112573	0.00108892	1.19727	0.999951	PM54	CM55	35959.6	Malate dehydrogenase_ mitochondrial OS=Homo sapiens OX=9606 GN=MDH2 PE=1 SV=3	3461.2	3358.86	3513.12	3997.26	4135.11	4239.28
O75445;O75445-3;O75445-2	30	5	131.369	0.00112874	0.00108913	1.36499	0.99995	CM55	PM54	586664	Usherin OS=Homo sapiens OX=9606 GN=USH2A PE=1 SV=3	2910.89	2848	2639.38	2144.1	2009.04	1999.47
A6ND36	7	1	32.6385	0.00113438	0.00109188	1.87011	0.999948	CM55	PM54	91120.3	Protein FAM83G OS=Homo sapiens OX=9606 GN=FAM83G PE=1 SV=2	1121.8	1323.17	1327.1	718.436	607.745	690.846
A0A2R8YEA1;B5MCJ9;O15016;O15016-2	1	1	4.3246	0.00114089	0.00109545	1.75784	0.999947	PM54	CM55	156891	Tripartite motif-containing protein 66 OS=Homo sapiens OX=9606 GN=TRIM66 PE=4 SV=1	186.401	198.336	187.474	293.576	356.412	355.865
Q6IS14	9	2	45.7199	0.00114857	0.00109743	1.28123	0.999944	PM54	CM55	17001.3	Eukaryotic translation initiation factor 5A-1-like OS=Homo sapiens OX=9606 GN=EIF5AL1 PE=2 SV=2	1110.61	1014.27	1022.3	1324.43	1352.97	1354.88
I3L397;I3L504;P63241;P63241-2;C9J4W5;C9J7B5;F8WCJ1;Q9GZV4	9	1	60.6135	0.00114857	0.00109743	1.28123	0.999944	PM54	CM55	16247.3	Eukaryotic translation initiation factor 5A (Fragment) OS=Homo sapiens OX=9606 GN=EIF5A PE=1 SV=8	1165.19	1064.11	1072.54	1389.52	1419.46	1421.46
Q12789;Q12789-3;H3BU37	10	1	52.4601	0.00115447	0.00110038	1.94829	0.999943	PM54	CM55	241213	General transcription factor 3C polypeptide 1 OS=Homo sapiens OX=9606 GN=GTF3C1 PE=1 SV=4	259.664	211.817	205.929	411.988	443.399	464.403
REVERSE22151	4	2	14.2732	0.00116427	0.00110702	1.66795	0.99994	PM54	CM55	100876	Reversed Sequence 22151	327.176	300.816	300.224	537.831	461.56	548.831
Q5UIP0;Q5UIP0-2;H7BZN3;H7C2B5	7	2	29.9626	0.00117117	0.00111088	1.45325	0.999938	CM55	PM54	276633	Telomere-associated protein RIF1 OS=Homo sapiens OX=9606 GN=RIF1 PE=1 SV=2	1891.2	1916.77	1754.66	1317.73	1185.77	1324.2
Q8N5V2;Q8N5V2-3	3	1	11.6401	0.00118318	0.00111955	3.64995	0.999934	CM55	PM54	83180.9	Ephexin-1 OS=Homo sapiens OX=9606 GN=NGEF PE=1 SV=2	583.518	867.778	817.102	243.375	174.504	203.609
H3BLU7;O43488;Q8NHP1	4	1	22.9722	0.00118948	0.00112279	1.58189	0.999932	CM55	PM54	35026.5	Aflatoxin B1 aldehyde reductase member 2 (Fragment) OS=Homo sapiens OX=9606 GN=AKR7A2 PE=1 SV=1	1155.74	1037.29	1044.93	647.641	742.743	656.509
P16949;P16949-2;A2A2D0	5	1	42.7858	0.00122063	0.00114942	1.17707	0.999922	PM54	CM55	17302.5	Stathmin OS=Homo sapiens OX=9606 GN=STMN1 PE=1 SV=3	1870.89	1929.81	1807.92	2197.91	2176.59	2227.25
P49327;A0A0U1RQF0;A0A0U1RRG3;A0A1B0GTR5	23	6	107.264	0.00124254	0.00116724	1.20892	0.999914	CM55	PM54	276050	Fatty acid synthase OS=Homo sapiens OX=9606 GN=FASN PE=1 SV=3	21055.7	21789.6	21443	17288.4	17409.3	18480.8
REVERSE582	6	1	29.5812	0.0012598	0.00118047	3.87642	0.999907	PM54	CM55	200305	Reversed Sequence 582	50.4353	39.3947	40.8345	197.4	123.735	185.377
P22314;P22314-2;Q5JRR6;Q5JRR9;Q5JRS0;Q5JRS1;Q5JRS2;Q5JRS3	24	13	133.627	0.00126267	0.00118047	1.3352	0.999906	CM55	PM54	118933	Ubiquitin-like modifier-activating enzyme 1 OS=Homo sapiens OX=9606 GN=UBA1 PE=1 SV=3	5436.42	5178.69	5518.93	3838.62	3988.44	4256.54
REVERSE28730	3	1	12.5441	0.00127376	0.00118501	164.214	0.999901	CM55	PM54	153723	Reversed Sequence 28730	189.862	335.591	431.705	2.87206	2.95666	0
E9PJP2;Q5TF21;H3BRB8	5	1	20.2003	0.00127427	0.00118501	1.99196	0.999901	PM54	CM55	103227	Protein SOGA3 OS=Homo sapiens OX=9606 GN=SOGA3 PE=1 SV=1	137.492	135.235	160.463	289.111	254.607	319.179
P63104;E7EX29;B0AZS6;P63104-2;H0YB80;B7Z2E6;E7ESK7;E5RGE1;E5RIR4;E7EVZ2;E9PD24;P31947;P31947-2	18	10	143.95	0.00127662	0.00118501	1.19164	0.9999	CM55	PM54	27916.2	14-3-3 protein zeta/delta OS=Homo sapiens OX=9606 GN=YWHAZ PE=1 SV=1	16542.8	17319.3	17317.7	14674.5	13915	14359.4
REVERSE10857	7	3	39.2716	0.00128565	0.00119057	1.11571	0.999896	PM54	CM55	313813	Reversed Sequence 10857	1279.85	1266.17	1292.71	1461.05	1402.22	1419.65
O95359;E7EMZ9;E9PBC6;O95359-3;O95359-5;D6RAA5;O95359-1;O95359-6;Q4VXL8;E9PGB3;O95359-2;Q4VXL4;H0Y911;H0Y9C3	8	1	44.0026	0.00131368	0.00121365	2.95554	0.999884	CM55	PM54	311823	Transforming acidic coiled-coil-containing protein 2 OS=Homo sapiens OX=9606 GN=TACC2 PE=1 SV=3	323.503	429.9	298.127	133.422	102.752	119.609
B4DLR8;H3BNV2;H3BRK3;P15559;P15559-2;P15559-3	2	1	19.6397	0.0013305	0.00122629	1.76977	0.999875	CM55	PM54	22850.3	NAD(P)H dehydrogenase [quinone] 1 OS=Homo sapiens OX=9606 GN=NQO1 PE=1 SV=1	2042.46	2144.53	2391.34	1174.81	1376.83	1165.41
O14672;C9J9B4;O14672-2	4	2	18.353	0.00134102	0.00123308	1.7581	0.99987	CM55	PM54	86195.2	Disintegrin and metalloproteinase domain-containing protein 10 OS=Homo sapiens OX=9606 GN=ADAM10 PE=1 SV=1	564.689	508.704	622.343	346.093	316.211	302.223
A0A0U1RRM6;Q8N8S7;Q8N8S7-2;Q8N8S7-3;A0A075B6E5;A0A0U1RQP7	4	2	23.3388	0.00134589	0.00123465	3.51622	0.999868	PM54	CM55	87742.4	Protein enabled homolog OS=Homo sapiens OX=9606 GN=ENAH PE=1 SV=1	93.3538	61.7794	91.7738	293.569	328.732	245.878
Q93079;O60814;P57053;P58876;P62807;Q5QNW6;Q5QNW6-2;Q99877;Q99879;Q99880;U3KQK0;A0A2R8Y619	13	6	70.1805	0.00135128	0.00123668	1.3562	0.999865	PM54	CM55	13892.1	Histone H2B type 1-H OS=Homo sapiens OX=9606 GN=HIST1H2BH PE=1 SV=3	2452.45	2483.38	2715.23	3335.82	3451.97	3588.53
Q8N573;Q8N573-8;Q8N573-2;Q8N573-5;H0YC07	5	1	23.2946	0.00135918	0.00124101	2.10351	0.999861	CM55	PM54	98540.6	Oxidation resistance protein 1 OS=Homo sapiens OX=9606 GN=OXR1 PE=1 SV=2	578.165	615.132	565.415	246.525	258.663	330.897
P23634;P23634-2;P23634-3;P23634-4;P23634-5;P23634-6;P23634-7;P23634-8	20	6	121.27	0.00138176	0.00125869	1.36089	0.999848	CM55	PM54	139118	Plasma membrane calcium-transporting ATPase 4 OS=Homo sapiens OX=9606 GN=ATP2B4 PE=1 SV=2	1369.67	1225.49	1259.27	972.148	951.023	909.12
G3V295;G3V5Z7;P60900;G3V3I1;P60900-2;G3V3U4;P60900-3	10	3	63.4599	0.00141447	0.00128264	1.45563	0.999829	CM55	PM54	23241.3	Proteasome subunit alpha type OS=Homo sapiens OX=9606 GN=PSMA6 PE=1 SV=1	1430.33	1264.47	1459.14	921.862	960.064	971.783
REVERSE21404	5	1	22.3917	0.00141657	0.00128264	2.03671	0.999827	CM55	PM54	99448.6	Reversed Sequence 21404	234.053	173.351	194.021	100.096	100.439	94.7584
P07437;Q5JP53;Q5ST81	36	4	369.004	0.00142066	0.00128264	1.17771	0.999825	CM55	PM54	50127.2	Tubulin beta chain OS=Homo sapiens OX=9606 GN=TUBB PE=1 SV=2	46633.5	48110.6	46942.8	39648.4	39090.3	41568.3
Q0VF96;Q0VF96-2	5	1	25.5637	0.00142309	0.00128264	1.81894	0.999823	PM54	CM55	149650	Cingulin-like protein 1 OS=Homo sapiens OX=9606 GN=CGNL1 PE=1 SV=2	491.347	450.297	384.097	788.154	846.311	776.978
Q15121;Q15121-2;B1AKZ5	4	2	34.1359	0.00143196	0.00128264	1.39351	0.999818	CM55	PM54	15097.1	Astrocytic phosphoprotein PEA-15 OS=Homo sapiens OX=9606 GN=PEA15 PE=1 SV=2	726.613	810.377	820.04	563.87	546.917	580.644
Q9NS87;Q9NS87-2;C9JKA9;Q9NS87-4;D6RCT7	12	1	46.1156	0.00143633	0.00128264	1.75708	0.999815	CM55	PM54	161130	Kinesin-like protein KIF15 OS=Homo sapiens OX=9606 GN=KIF15 PE=1 SV=1	1182.71	954.766	1065.25	605.514	646.788	570.454
P48681	14	3	70.342	0.0014364	0.00128264	1.51508	0.999815	CM55	PM54	177895	Nestin OS=Homo sapiens OX=9606 GN=NES PE=1 SV=2	751.374	867.793	820.305	506.719	566.884	536.53
A0A087X1X7;E9PRY8;P29692-2;E9PK01;E9PI39;E9PIZ1;E9PL12;E9PMW7;E9PPR1;E9PQ49;H0YCK7;P29692-3;E9PL71;E9PN91;E9PQZ1;P29692-4;E9PK06;E9PJV8;E9PKH7;E9PN56;E9PN71;E9PNC8;E9PPY1;E9PQC9;E9PQR8;E9PRL0;H0YE58;H0YE72	8	1	64.7204	0.00144043	0.00128264	1.34805	0.999812	CM55	PM54	69738.7	Elongation factor 1-delta OS=Homo sapiens OX=9606 GN=EEF1D PE=1 SV=1	1786.94	1580.91	1649.65	1263.04	1211.01	1247.99
P29692	7	1	51.5161	0.00144044	0.00128264	1.34805	0.999812	CM55	PM54	31235.9	Elongation factor 1-delta OS=Homo sapiens OX=9606 GN=EEF1D PE=1 SV=5	1249.87	1105.76	1153.84	883.427	847.04	872.899
P04179;P04179-4;F5GYZ5;F5H3C5;F5H4R2;P04179-2;P04179-3;G8JLJ2	4	2	27.0626	0.00144258	0.00128264	27.1947	0.999811	CM55	PM54	24921.3	Superoxide dismutase [Mn]_ mitochondrial OS=Homo sapiens OX=9606 GN=SOD2 PE=1 SV=3	1145.42	1066.8	1171.78	60.8183	48.9578	14.6597
REVERSE14578	2	1	8.0625	0.00144415	0.00128264	1.6331	0.99981	PM54	CM55	182058	Reversed Sequence 14578	109.718	129.791	122.852	183.058	199.827	208.887
E7EMS2;G3V2V8;G3V3D1;G3V3E8;H0YIZ1;J3KMY5;P61916;P61916-2	1	1	6.3814	0.00148533	0.00131279	1.50109	0.999781	CM55	PM54	22954.5	NPC intracellular cholesterol transporter 2 OS=Homo sapiens OX=9606 GN=NPC2 PE=1 SV=1	2219.01	2242.33	2379.76	1378.39	1605.45	1573.58
REVERSE12414	13	1	54.5482	0.00148788	0.00131279	736.703	0.999779	CM55	PM54	204101	Reversed Sequence 12414	2261.44	2132.69	2039.38	8.73285	0	0
Q9NTJ5;E9PGZ4;Q9NTJ5-2;C9JV50	3	2	12.7548	0.00148819	0.00131279	1.82725	0.999779	CM55	PM54	67480.3	Phosphatidylinositide phosphatase SAC1 OS=Homo sapiens OX=9606 GN=SACM1L PE=1 SV=2	1242.06	1377.34	1169.38	735.105	608.957	729.428
REVERSE26529	1	1	4.3538	0.00151115	0.00132944	91.9853	0.999761	CM55	PM54	51879.4	Reversed Sequence 26529	564.013	614.31	583.967	13.6584	4.12398	1.37596
P13489;E9PIM9;E9PLZ3;E9PMJ3;H0YCR7;E9PIK5;E9PMN0;E9PMA9;E9PMI1;E9PR82	20	15	131.82	0.00151386	0.00132944	1.13387	0.999759	CM55	PM54	51798.4	Ribonuclease inhibitor OS=Homo sapiens OX=9606 GN=RNH1 PE=1 SV=2	3922.41	4071.7	3910.55	3538.96	3431.8	3528.34
E7ESJ3;Q9UPS8	3	1	12.7096	0.00151903	0.00133099	2.95762	0.999755	CM55	PM54	199528	Ankyrin repeat domain-containing protein 26 OS=Homo sapiens OX=9606 GN=ANKRD26 PE=1 SV=1	2814.65	2650.03	2537.46	959.236	674.445	1071.92
F8WBJ5;F8WBQ6;Q9NUJ1;Q9NUJ1-3	1	1	4.9877	0.0015318	0.00133479	1.88427	0.999745	CM55	PM54	5878.93	Mycophenolic acid acyl-glucuronide esterase_ mitochondrial OS=Homo sapiens OX=9606 GN=ABHD10 PE=4 SV=1	1157.77	1011.42	894.956	508.835	545.501	571.841
Q7Z5N4;F8W6X9;Q7Z5N4-3;A0A087WTQ6	9	1	46.989	0.00153518	0.00133479	1.78666	0.999742	CM55	PM54	243139	Protein sidekick-1 OS=Homo sapiens OX=9606 GN=SDK1 PE=2 SV=3	793.337	626.121	650.996	393.978	375.242	389.623
E9PG32;Q6ZR08-3;H7C5N3;Q6ZR08-2	15	2	69.392	0.00153602	0.00133479	1.44059	0.999741	CM55	PM54	458319	Dynein heavy chain 12_ axonemal OS=Homo sapiens OX=9606 GN=DNAH12 PE=1 SV=2	4240.77	4112.71	4451.44	3133.45	2727.91	3027.32
Q9Y2I7;C9JL08;E9PDH4;F8WEZ0;Q9Y2I7-2;Q9Y2I7-3;Q9Y2I7-4	8	3	35.4771	0.00153704	0.00133479	1.88264	0.999741	CM55	PM54	239760	1-phosphatidylinositol 3-phosphate 5-kinase OS=Homo sapiens OX=9606 GN=PIKFYVE PE=1 SV=3	317.703	297.054	330.772	178.014	142.835	181.388
Q07960;H0YE29;E9PNR6	8	3	39.187	0.00156403	0.00135522	1.44416	0.999718	CM55	PM54	50492.8	Rho GTPase-activating protein 1 OS=Homo sapiens OX=9606 GN=ARHGAP1 PE=1 SV=1	1336.91	1238.26	1315.64	883.485	970.304	840.381
O95425;O95425-3;O95425-4;O95425-2	14	2	65.6233	0.00157458	0.00136135	1.33909	0.999708	PM54	CM55	249572	Supervillin OS=Homo sapiens OX=9606 GN=SVIL PE=1 SV=2	1629.01	1689.08	1809.59	2197.33	2292.54	2376.53
Q99584	6	3	32.7907	0.00158578	0.001368	1.31792	0.999698	PM54	CM55	11471.2	Protein S100-A13 OS=Homo sapiens OX=9606 GN=S100A13 PE=1 SV=1	774.689	754.437	825.175	1010.29	1085.65	1006.83
Q5VV63;E9PL90;Q5VV63-2;R4GMZ1	2	1	8.9105	0.00159975	0.00137701	2.5961	0.999685	CM55	PM54	157544	Attractin-like protein 1 OS=Homo sapiens OX=9606 GN=ATRNL1 PE=2 SV=2	435.107	549.996	646.192	229.424	199.14	199.801
P00403	1	1	5.816	0.00161342	0.00138573	435.4	0.999672	CM55	PM54	25736.2	Cytochrome c oxidase subunit 2 OS=Homo sapiens OX=9606 GN=MT-CO2 PE=1 SV=1	2144.4	1774.64	1733.14	8.68888	4.29271	0
D6RFM5;P31040;P31040-2;A0A087X1I3;P31040-3	6	2	27.9588	0.00161814	0.00138674	3.43517	0.999668	PM54	CM55	64479.6	Succinate dehydrogenase [ubiquinone] flavoprotein subunit_ mitochondrial OS=Homo sapiens OX=9606 GN=SDHA PE=1 SV=1	30.3824	47.2216	36.0045	112.183	121.281	156.8
P83731;C9JNW5;C9JXB8	9	5	52.0583	0.0016383	0.00140094	1.32951	0.999648	PM54	CM55	17893	60S ribosomal protein L24 OS=Homo sapiens OX=9606 GN=RPL24 PE=1 SV=1	652.022	588.999	622.95	789.265	854.865	834.037
P13645	2	1	10.0641	0.00166833	0.00142351	1.50602	0.999616	CM55	PM54	59055.3	Keratin_ type I cytoskeletal 10 OS=Homo sapiens OX=9606 GN=KRT10 PE=1 SV=6	1067.13	1009.22	1098.17	772.627	668.166	667.093
Q9HD45;Q5TB53	4	2	19.266	0.001675	0.00142513	1.51421	0.999609	CM55	PM54	68629.8	Transmembrane 9 superfamily member 3 OS=Homo sapiens OX=9606 GN=TM9SF3 PE=1 SV=2	685.739	721.947	720.58	478.739	504.6	422.192
Q8N392;Q8N392-2	3	1	12.3925	0.00168267	0.00142513	Infinity	0.999601	CM55	PM54	75262	Rho GTPase-activating protein 18 OS=Homo sapiens OX=9606 GN=ARHGAP18 PE=1 SV=3	204.327	179.134	23.5618	0	0	0
O15143;C9JEY1;C9K057;C9J4Z7;C9J6C8;C9JBJ7;C9JFG9;C9JQM8;C9JTT6;F8VXW2;C9JM51;F8WEB3	9	5	49.0557	0.00168336	0.00142513	1.3922	0.9996	CM55	PM54	41748.2	Actin-related protein 2/3 complex subunit 1B OS=Homo sapiens OX=9606 GN=ARPC1B PE=1 SV=3	737.788	709.6	753.309	502.143	508.193	570.395
Q5UE93;A0A087X1F3	3	1	21.9544	0.00168481	0.00142513	10.5274	0.999598	CM55	PM54	85113.6	Phosphoinositide 3-kinase regulatory subunit 6 OS=Homo sapiens OX=9606 GN=PIK3R6 PE=1 SV=1	325.077	454.588	437.087	44.5045	51.7128	19.3626
REVERSE20193	8	2	38.1279	0.00169615	0.0014307	1.63678	0.999585	CM55	PM54	82162.4	Reversed Sequence 20193	752.899	784.873	705.222	481.857	483.313	405.201
A0A087WY71;E9PFW3;Q96CW1;Q96CW1-2;H7C4C3;C9JJ47;C9JGT8;C9JJD3;C9JPV8;C9JTK4	6	1	33.2094	0.00170102	0.0014307	1.40975	0.99958	PM54	CM55	49868.8	AP-2 complex subunit mu OS=Homo sapiens OX=9606 GN=AP2M1 PE=1 SV=1	1617.94	1614.25	1517.2	2413.84	2164.89	2116.72
Q14CZ7	3	1	16.0178	0.00170238	0.0014307	10.5419	0.999578	PM54	CM55	76944	FAST kinase domain-containing protein 3_ mitochondrial OS=Homo sapiens OX=9606 GN=FASTKD3 PE=1 SV=2	73.1006	34.9782	24.4295	457.899	519.336	419.65
Q96N66;Q96N66-2;Q96N66-3	2	2	12.2659	0.00170796	0.00143231	1.51618	0.999572	PM54	CM55	53449.4	Lysophospholipid acyltransferase 7 OS=Homo sapiens OX=9606 GN=MBOAT7 PE=1 SV=2	720.185	831.883	705.834	1140.53	1099.4	1183.45
Q6W2J9;Q6W2J9-2;Q6W2J9-4;H7BYY2;A6NE70;H7BZ37;H7C2V9;A1A564;Q6W2J9-3	9	1	27.5676	0.00171945	0.00143715	1.42477	0.999559	CM55	PM54	193729	BCL-6 corepressor OS=Homo sapiens OX=9606 GN=BCOR PE=1 SV=1	15735.8	16172.6	14143.8	11283.8	10448.8	10589.8
F5GZP6;Q86W92;Q86W92-2;Q86W92-3;Q86W92-4;H0YFE4	5	2	28.039	0.0017211	0.00143715	3.974	0.999557	PM54	CM55	84414	Liprin-beta-1 (Fragment) OS=Homo sapiens OX=9606 GN=PPFIBP1 PE=1 SV=1	78.266	41.0643	61.7995	234.957	249.316	235.537
A0A087WVD1;Q96B70	2	1	9.2385	0.00172778	0.00143966	1.48856	0.999549	CM55	PM54	51337.3	Leukocyte receptor cluster member 9 OS=Homo sapiens OX=9606 GN=LENG9 PE=1 SV=1	1089.41	1238.35	1272.53	778.234	798.954	841.448
P12882	24	1	124.213	0.00173193	0.00144005	18.4073	0.999544	CM55	PM54	224115	Myosin-1 OS=Homo sapiens OX=9606 GN=MYH1 PE=1 SV=3	367.11	182.484	133.703	14.8045	15.1348	7.1817
REVERSE34561	10	1	50.6443	0.00174854	0.00144557	1.44391	0.999523	CM55	PM54	145807	Reversed Sequence 34561	982.534	1063.07	1079.45	693.858	690.176	780.265
A8MUH2;P18859;P18859-2	3	1	17.1337	0.00175092	0.00144557	Infinity	0.99952	PM54	CM55	13953.9	ATP synthase-coupling factor 6_ mitochondrial OS=Homo sapiens OX=9606 GN=ATP5PF PE=1 SV=1	0	0	0	25.7821	282.467	83.9873
Q8NBS9;Q8NBS9-2	6	5	44.516	0.00175108	0.00144557	1.08006	0.99952	CM55	PM54	48313.2	Thioredoxin domain-containing protein 5 OS=Homo sapiens OX=9606 GN=TXNDC5 PE=1 SV=2	523.238	541.719	529.405	493.669	491.875	490.635
REVERSE56452	19	1	72.1314	0.00175338	0.00144557	1.3954	0.999517	CM55	PM54	350266	Reversed Sequence 56452	4231.65	4244.41	4088.37	2751.78	3076.59	3175.77
Q9P2D1;Q9P2D1-2;Q9P2D1-3	14	1	61.8313	0.00176183	0.00144948	2.54165	0.999507	CM55	PM54	337753	Chromodomain-helicase-DNA-binding protein 7 OS=Homo sapiens OX=9606 GN=CHD7 PE=1 SV=3	1275.1	1397.38	962.223	450.208	529.273	450.575
P60842;J3KT12;P60842-2;J3KSZ0;J3QS69;J3KTB5;J3QL43;J3QR64;J3KTN0;J3QLN6;J3KS25;J3QKZ9;J3QL52;E7EMV8;J3KS93;J3KSN7;J3KT04;E9PBH4;F8WE11;I3L3H2;J3QQP0	18	5	146.456	0.00177426	0.00145664	1.16516	0.999491	CM55	PM54	46382.2	Eukaryotic initiation factor 4A-I OS=Homo sapiens OX=9606 GN=EIF4A1 PE=1 SV=1	5955.33	5854.27	5786.99	5060.99	4857.94	5183.33
P17813;P17813-2;F5GX88	6	2	35.7466	0.00180115	0.00147562	3.23628	0.999455	CM55	PM54	71604.7	Endoglin OS=Homo sapiens OX=9606 GN=ENG PE=1 SV=2	609.422	730.196	693.255	242.061	235.083	151.007
Q9NZR2	33	4	123.098	0.00180943	0.0014793	2.67119	0.999444	CM55	PM54	535173	Low-density lipoprotein receptor-related protein 1B OS=Homo sapiens OX=9606 GN=LRP1B PE=1 SV=2	290.826	377.481	344.465	104.715	153.036	121.395
A0A087WUD3;Q9NRP0;Q9NRP0-2	1	1	7.2418	0.00182448	0.00148849	1.24402	0.999423	CM55	PM54	9426.21	Oligosaccharyltransferase complex subunit OSTC OS=Homo sapiens OX=9606 GN=OSTC PE=1 SV=1	4791.06	4732.87	5100.65	4011.65	3776.83	3967.41
A0A0A0MSG2;J3KNW4;Q14192	9	4	62.0928	0.00184777	0.00150435	1.45086	0.999389	PM54	CM55	47062.6	Four and a half LIM domains protein 2 OS=Homo sapiens OX=9606 GN=FHL2 PE=1 SV=1	1388.92	1237.57	1189.48	1817.99	1922.82	1795.64
O75128;O75128-2;J3KR05;O75128-3;O75128-7;H7C1N2;O75128-6;A0A0J9YWK3;O75128-4;O75128-5;C9J9X1	7	1	34.4579	0.00186546	0.00151325	1.71708	0.999363	CM55	PM54	136529	Protein cordon-bleu OS=Homo sapiens OX=9606 GN=COBL PE=1 SV=2	647.157	727.464	754.076	369.323	420.199	450.2
Q92824;B1AMG5;Q92824-2	5	2	20.2205	0.00187156	0.00151325	1.56188	0.999354	CM55	PM54	218120	Proprotein convertase subtilisin/kexin type 5 OS=Homo sapiens OX=9606 GN=PCSK5 PE=1 SV=4	1418.14	1224.5	1421.85	815.828	923.036	863.444
Q2M3C7;Q2M3C7-2	4	2	15.991	0.00187252	0.00151325	2.23838	0.999352	CM55	PM54	189194	A-kinase anchor protein SPHKAP OS=Homo sapiens OX=9606 GN=SPHKAP PE=1 SV=1	1568.65	1206.74	1118.76	622.732	549.023	567.959
REVERSE21506	4	1	16.9486	0.00187418	0.00151325	2.36791	0.99935	PM54	CM55	66861.9	Reversed Sequence 21506	71.5518	56.3391	56.262	155.373	121.362	159.323
Q63HN8;A0A0A0MTR7;Q63HN8-6	39	7	167.72	0.00187914	0.00151412	1.24351	0.999342	CM55	PM54	598936	E3 ubiquitin-protein ligase RNF213 OS=Homo sapiens OX=9606 GN=RNF213 PE=1 SV=3	4363.08	4325.58	4050.52	3367.3	3540.64	3336.57
Q9C0G6;Q9C0G6-4;Q9C0G6-2;Q9C0G6-3	46	3	202.941	0.0018985	0.00152657	2.3123	0.999312	CM55	PM54	479975	Dynein heavy chain 6_ axonemal OS=Homo sapiens OX=9606 GN=DNAH6 PE=2 SV=3	160.822	201.324	218.518	72.5684	89.5755	88.9753
P52597;A0A1B0GW42	7	2	40.5467	0.00197304	0.00158326	1.34093	0.999188	CM55	PM54	46014.1	Heterogeneous nuclear ribonucleoprotein F OS=Homo sapiens OX=9606 GN=HNRNPF PE=1 SV=3	872.222	758.575	804.598	605	607.872	603.327
Q9UHV7;J3QRB7	8	3	37.7239	0.00199852	0.00159933	1.31491	0.999142	PM54	CM55	242833	Mediator of RNA polymerase II transcription subunit 13 OS=Homo sapiens OX=9606 GN=MED13 PE=1 SV=3	2169.66	2209.81	1975.05	2862.5	2708.16	2784.99
F5H5D3;Q9BQE3;A0A1W2PQM2	22	2	267.278	0.00200365	0.00159933	1.09162	0.999133	CM55	PM54	58642.7	Tubulin alpha chain OS=Homo sapiens OX=9606 GN=TUBA1C PE=1 SV=1	15285.9	15205.2	15681.8	13885	14190.4	14222.2
REVERSE11427	2	1	9.0222	0.00200535	0.00159933	1.35241	0.99913	CM55	PM54	78752.1	Reversed Sequence 11427	8446.16	8651.5	7693.38	6378.97	6008.26	5943.78
Q06730	3	1	11.6572	0.00205428	0.00163501	1.33246	0.999037	CM55	PM54	97235.5	Zinc finger protein 33A OS=Homo sapiens OX=9606 GN=ZNF33A PE=1 SV=3	431.053	409.175	409.787	319.994	327.544	290.586
A0A075B7D9;Q92804;Q92804-2;A0A075B7F4	4	1	21.6395	0.00206201	0.00163652	1.46601	0.999022	CM55	PM54	49181.8	TATA-binding protein-associated factor 2N OS=Homo sapiens OX=9606 GN=TAF15 PE=1 SV=1	378.628	336.731	393.525	252.781	240.535	263.083
P29590;P29590-2;P29590-3;P29590-4;P29590-5;P29590-8;P29590-9;H3BT57;P29590-10;P29590-11;P29590-12;P29590-13;P29590-14	4	2	20.2871	0.00207	0.00163652	1.72062	0.999006	CM55	PM54	99204.5	Protein PML OS=Homo sapiens OX=9606 GN=PML PE=1 SV=3	410.816	471.543	492.053	238.823	276.377	283.588
B2R5W2;B4DY08;G3V4C1;G3V4W0;P07910-2;P07910-4;G3V2Q1;G3V576;P07910;G3V251;G3V3K6;G3V5X6;B4DSU6;G3V555;G3V575;G3V4M8;P07910-3;G3V2D6;G3V2H6;G3V5V7	12	4	79.6731	0.00207074	0.00163652	1.20304	0.999005	CM55	PM54	32005.3	Heterogeneous nuclear ribonucleoproteins C1/C2 OS=Homo sapiens OX=9606 GN=HNRNPC PE=1 SV=1	2361.62	2218.21	2402.94	1962.53	1902.29	1939.47
P02545;P02545-3;P02545-6;P02545-5;P02545-4;H0YAB0;A0A0C4DGC5	50	15	327.545	0.00207292	0.00163652	1.54216	0.999	CM55	PM54	74424.7	Prelamin-A/C OS=Homo sapiens OX=9606 GN=LMNA PE=1 SV=1	5207.79	5116.69	4312.06	3127.27	3187.84	3175.82
Q99733;Q99733-2;C9JZI7;H0YCI4;A8MXH2;C9J6D1;E9PJJ2;E9PKT8;E9PNJ7;E9PNW0;E9PS34	5	2	32.2638	0.0021017	0.00165367	1.78026	0.998942	CM55	PM54	42994.6	Nucleosome assembly protein 1-like 4 OS=Homo sapiens OX=9606 GN=NAP1L4 PE=1 SV=1	715.655	848.285	861.237	483.527	473.507	405.23
REVERSE29757	3	2	13.1624	0.00210312	0.00165367	1.28919	0.998939	CM55	PM54	106659	Reversed Sequence 29757	689.171	748.051	698.507	565.726	524.561	566.352
Q9UK10;K7ENA2;K7ENC8;K7ERU6;C9K038;Q96K75	3	1	15.599	0.00213548	0.00167575	3.31558	0.99887	CM55	PM54	84980.8	Zinc finger protein 225 OS=Homo sapiens OX=9606 GN=ZNF225 PE=1 SV=2	118.615	113.445	134.143	42.5185	25.7413	42.1892
Q9Y678;H0Y8G2;H0Y8X7	14	6	74.9674	0.00214767	0.00167865	1.20693	0.998844	CM55	PM54	99030.1	Coatomer subunit gamma-1 OS=Homo sapiens OX=9606 GN=COPG1 PE=1 SV=1	1523.13	1569.71	1599.53	1306.79	1340.17	1240.89
A0A0R4J2E8;A8MXP9;P43243;D6REM6;B3KM87;P43243-2;D6R991;Q68E03;H0Y8T4	9	3	49.2745	0.00214776	0.00167865	3.11223	0.998843	CM55	PM54	95136.6	Matrin-3 OS=Homo sapiens OX=9606 GN=MATR3 PE=1 SV=1	378.345	277.351	251.308	117.032	91.7189	82.681
Q8TF09;Q9NP97;B1AKR6;H3BNG9;H3BPA0;H3BQI1;Q7Z4M1;Q9NP97-2	2	1	11.634	0.00215336	0.00167966	1.52608	0.998831	CM55	PM54	10911.7	Dynein light chain roadblock-type 2 OS=Homo sapiens OX=9606 GN=DYNLRB2 PE=1 SV=1	728.575	644.603	789.853	469.923	479.945	467.509
Q8IVF4;A0A1C7CYW8;A0A0J9YY17;F5H515;A0A087WV07;A0A096LNK1;A0A0J9YWH2;H0YGZ2;Q8IVF4-2	32	4	132.249	0.00216748	0.0016873	1.48437	0.9988	CM55	PM54	518035	Dynein heavy chain 10_ axonemal OS=Homo sapiens OX=9606 GN=DNAH10 PE=1 SV=4	800.079	839.924	939.532	612.528	554.191	571.073
E9PD68;Q14194;Q14194-2	5	1	32.6365	0.00224024	0.0017403	2.23756	0.99863	PM54	CM55	62371.9	Dihydropyrimidinase-related protein 1 OS=Homo sapiens OX=9606 GN=CRMP1 PE=1 SV=1	90.3209	64.49	81.0576	156.503	192.993	178.273
Q14517;A0A087WVP1;D6RCE4	19	2	81.5333	0.00224742	0.0017403	1.29811	0.998612	CM55	PM54	509695	Protocadherin Fat 1 OS=Homo sapiens OX=9606 GN=FAT1 PE=1 SV=2	2079.35	1934.81	2070.51	1588.46	1474	1624.86
E9PH71;O15381;C9J6P7;O15381-2;E7EWK7;E9PGD8;O15381-5	4	1	21.9075	0.00224891	0.0017403	1.29958	0.998608	CM55	PM54	33614.4	Nuclear valosin-containing protein-like OS=Homo sapiens OX=9606 GN=NVL PE=1 SV=1	14376.7	15509.7	16286.4	11624	11997.4	11907.7
M0R0F3;Q6ZN19;Q6ZN19-2;Q6ZN19-3	2	1	8.9888	0.00225385	0.00174067	1.8851	0.998596	PM54	CM55	60289.5	Zinc finger protein 841 (Fragment) OS=Homo sapiens OX=9606 GN=ZNF841 PE=1 SV=1	311.5	273.978	270.869	534.699	466.585	613.017
Q6V0I7;Q6V0I7-3	9	1	42.7602	0.00226153	0.00174316	2.48657	0.998577	CM55	PM54	546622	Protocadherin Fat 4 OS=Homo sapiens OX=9606 GN=FAT4 PE=1 SV=2	569.963	583.718	623.418	296.587	188.744	229.347
P31150;G5E9U5	21	9	120.87	0.00227292	0.00174849	1.21835	0.998549	CM55	PM54	51210.1	Rab GDP dissociation inhibitor alpha OS=Homo sapiens OX=9606 GN=GDI1 PE=1 SV=2	2629.79	2782.19	2703.6	2310.7	2130.49	2219.91
Q9UL25	1	1	4.3078	0.00235071	0.00180478	3.95982	0.998344	PM54	CM55	24746.8	Ras-related protein Rab-21 OS=Homo sapiens OX=9606 GN=RAB21 PE=1 SV=3	219.12	386.402	388.516	1222.03	1515.61	1198.57
H3BPE7;P35637;P35637-2	6	1	33.8136	0.00236659	0.00181341	1.59427	0.998301	CM55	PM54	53725.1	RNA-binding protein FUS OS=Homo sapiens OX=9606 GN=FUS PE=1 SV=1	800.316	726.467	703.381	519.905	442.415	436.539
REVERSE12820	7	1	33.6566	0.00238044	0.00182045	5.50693	0.998262	PM54	CM55	107869	Reversed Sequence 12820	44.8901	22.3631	21.647	162.591	190.498	136.478
P07858;E9PHZ5;E9PKQ7;E9PLY3;E9PNL5;E9PQM1;E9PSG5;E9PCB3;E9PJ67;R4GMQ5	18	8	91.2823	0.00239262	0.0018262	1.19087	0.998228	CM55	PM54	38791.1	Cathepsin B OS=Homo sapiens OX=9606 GN=CTSB PE=1 SV=3	3876.49	3584.89	3751.35	3194.02	3151.72	3069.85
REVERSE4720	8	1	33.492	0.00242143	0.00184458	3.89032	0.998145	PM54	CM55	134205	Reversed Sequence 4720	45.5407	29.8479	26.0143	162.059	115.028	117.403
REVERSE562	3	1	12.5649	0.00247639	0.00188278	1.97334	0.99798	CM55	PM54	128768	Reversed Sequence 562	812.236	762.01	598.271	388.201	368.011	344.722
B4DYW4;E9PJ48;E9PL16;E9PPH4;Q86VG3;Q86VG3-2	1	1	5.1834	0.00249253	0.00189137	8.45265	0.99793	PM54	CM55	13071.4	cDNA FLJ51661 OS=Homo sapiens OX=9606 GN=C11orf74 PE=1 SV=1	158.165	121.528	53.9029	1038.02	931.482	850.261
A0A1W2PNH8;A0A1W2PNQ8;A0A1W2PNR0;A0A1W2PQA9;A0A1W2PQP4;A0A1W2PQR8;A0A1W2PQZ1;A0A1W2PS19;O95427;A0A1W2PNW5;A0A1W2PPB6;A0A1W2PPR7;K7ELE1;A0A1W2PQ49;A0A1W2PRH3;K7EID9;K7EL34;K7EMD7;K7EPJ2;K7EQG0;K7ESH9	5	1	25.698	0.00250242	0.0018952	Infinity	0.997899	PM54	CM55	104343	GPI ethanolamine phosphate transferase 1 OS=Homo sapiens OX=9606 GN=PIGN PE=1 SV=1	0	0	0	68.1477	9.68957	57.487
P08133;P08133-2;E5RK69;E7EMC6;E5RFF0;E5RJF5;E5RK63;E5RI05;E5RIU8;E5RJR0;H0YC77	64	45	339.409	0.00251153	0.00189841	1.28464	0.99787	CM55	PM54	76215.6	Annexin A6 OS=Homo sapiens OX=9606 GN=ANXA6 PE=1 SV=3	11049.4	10133.1	11076.9	8150.43	8753.55	8207.66
P08134;Q5JR08;E9PQH6	7	1	54.6266	0.00251765	0.00189937	1.15935	0.997851	CM55	PM54	22348.6	Rho-related GTP-binding protein RhoC OS=Homo sapiens OX=9606 GN=RHOC PE=1 SV=1	2452.06	2471.22	2572.07	2213.76	2158.08	2093.28
Q5H8C1;F8WE85	8	1	39.195	0.00254164	0.0019105	1.33337	0.997774	CM55	PM54	245980	FRAS1-related extracellular matrix protein 1 OS=Homo sapiens OX=9606 GN=FREM1 PE=1 SV=3	34037.4	36035.3	32114.4	26899.4	25116	24622.8
REVERSE14032	3	1	12.2136	0.00254852	0.0019105	1.40791	0.997751	PM54	CM55	103630	Reversed Sequence 14032	1286.51	1303.78	1407.21	1927.93	1722.82	1977.38
H7BZ55	6	1	23.498	0.00255146	0.0019105	140.231	0.997742	CM55	PM54	187012	Putative ciliary rootlet coiled-coil protein 2 OS=Homo sapiens OX=9606 GN=CROCC2 PE=5 SV=3	125.737	104.261	301.224	3.78821	0	0
Q9NZZ3;Q9NZZ3-2	2	1	12.0808	0.00255197	0.0019105	1.45314	0.99774	CM55	PM54	24627.8	Charged multivesicular body protein 5 OS=Homo sapiens OX=9606 GN=CHMP5 PE=1 SV=1	976.826	927.168	818.392	606.071	624.117	643.263
Q9UHB6;Q9UHB6-4;F8VQE1;Q9UHB6-2;Q9UHB6-5;F8VS07;Q9UHB6-3;F8VRN8;F8VTU2;F8VVQ7	13	4	76.3999	0.00256261	0.0019148	1.29455	0.997705	CM55	PM54	85681.9	LIM domain and actin-binding protein 1 OS=Homo sapiens OX=9606 GN=LIMA1 PE=1 SV=1	1755.17	1584.03	1697.34	1283.57	1251.12	1355.88
P62879;C9JIS1;C9JXA5;E7EP32;C9JZN1;P62879-2	5	2	34.0404	0.00260891	0.00194567	1.84057	0.997549	CM55	PM54	38072.5	Guanine nucleotide-binding protein G(I)/G(S)/G(T) subunit beta-2 OS=Homo sapiens OX=9606 GN=GNB2 PE=1 SV=3	461.481	597.724	574.564	289.278	278.282	320.084
P30040;F8VY02;P30040-2	4	1	26.1556	0.00261977	0.00195006	2.55042	0.997511	CM55	PM54	29050.5	Endoplasmic reticulum resident protein 29 OS=Homo sapiens OX=9606 GN=ERP29 PE=1 SV=4	728.309	597.731	622.765	323.846	223.195	217.071
P05556;P05556-2;P05556-3;P05556-4;P05556-5;C9JPK5;E7EQW5;E7EUI6;E9PLR6;H7C4N8;Q5T3E6;E7ERX5	31	24	187.016	0.0026344	0.00195722	1.15608	0.99746	CM55	PM54	91723	Integrin beta-1 OS=Homo sapiens OX=9606 GN=ITGB1 PE=1 SV=2	6208.03	6589.34	6515.49	5468.46	5692.12	5544.94
REVERSE19385	8	1	33.8339	0.00264495	0.00196133	15.6944	0.997423	PM54	CM55	153520	Reversed Sequence 19385	33.1443	7.6628	10.6925	290.986	265.896	251.371
REVERSE1747	3	1	13.8815	0.0026747	0.00197913	2.78601	0.997317	CM55	PM54	37955.1	Reversed Sequence 1747	549.179	456.141	483.069	194.813	130.352	209.071
P13929;P13929-2;P13929-3;E5RGZ4;E5RG95;E5RI09;K7EKN2;K7EPM1	12	3	67.0358	0.00267909	0.00197913	1.16356	0.997301	CM55	PM54	47329.1	Beta-enolase OS=Homo sapiens OX=9606 GN=ENO3 PE=1 SV=5	1748.68	1733.46	1689.51	1522.76	1498.74	1423.18
P63096;P63096-2;C9JPP4	10	3	56.3294	0.0026947	0.0019869	1.79847	0.997244	PM54	CM55	40931.4	Guanine nucleotide-binding protein G(i) subunit alpha-1 OS=Homo sapiens OX=9606 GN=GNAI1 PE=1 SV=2	168.125	185.827	226.033	353.524	356.974	332.587
P52306;P52306-2;P52306-3;P52306-5;P52306-6;P52306-4;D6RHH8;D6RHZ7;H0Y8M2	7	2	37.4792	0.00270139	0.00198789	1.88202	0.997219	PM54	CM55	67115.4	Rap1 GTPase-GDP dissociation stimulator 1 OS=Homo sapiens OX=9606 GN=RAP1GDS1 PE=1 SV=3	282.425	264.233	205.693	463.966	476.38	475.594
J3KQ32;Q9NTK5;Q9NTK5-3;C9JTK6;Q9NTK5-2	3	1	15.9736	0.00270621	0.00198789	1.69038	0.997201	PM54	CM55	47166.2	Obg-like ATPase 1 OS=Homo sapiens OX=9606 GN=OLA1 PE=1 SV=1	786.438	942.198	780.143	1454.62	1277.87	1508.29
REVERSE36450	2	2	9.0115	0.00274346	0.00200274	1.61858	0.997061	PM54	CM55	75017.4	Reversed Sequence 36450	462.527	391.072	364.076	683.276	639.293	648.334
Q86VB7;C9JHR8;F5GZZ9;Q86VB7-2;Q86VB7-3;Q86VB7-4;H0YGZ7	8	1	41.507	0.00274695	0.00200274	1.41692	0.997048	CM55	PM54	129671	Scavenger receptor cysteine-rich type 1 protein M130 OS=Homo sapiens OX=9606 GN=CD163 PE=1 SV=2	408.907	481.294	474.45	318.795	325.084	319.231
Q7Z333;Q7Z333-3;Q7Z333-4	14	1	56.4027	0.00274747	0.00200274	2.31164	0.997046	CM55	PM54	307214	Probable helicase senataxin OS=Homo sapiens OX=9606 GN=SETX PE=1 SV=4	453.495	532.876	520.413	219.297	172.624	259.902
Q15293;Q15293-2;E9PP27	7	4	42.165	0.00274972	0.00200274	1.52636	0.997037	PM54	CM55	38890	Reticulocalbin-1 OS=Homo sapiens OX=9606 GN=RCN1 PE=1 SV=1	752.8	741.367	615.593	1081.45	1073.14	1065.65
Q86WZ6	3	1	9.4978	0.00275205	0.00200274	62.9942	0.997028	PM54	CM55	94656.2	Zinc finger protein 227 OS=Homo sapiens OX=9606 GN=ZNF227 PE=1 SV=1	0	3.43142	0	61.6704	70.6195	83.8696
REVERSE8615	15	4	60.2986	0.00278496	0.00202293	1.17906	0.9969	PM54	CM55	464696	Reversed Sequence 8615	21460.2	20731	21360	24928.8	24024.8	25977.2
A0A0A0MQR4;Q96RK0	3	2	15.0013	0.00279539	0.00202673	1.55369	0.996859	CM55	PM54	164248	Protein capicua homolog OS=Homo sapiens OX=9606 GN=CIC PE=1 SV=1	1448.56	1484.17	1734.16	937.91	1062.33	1003.51
REVERSE37554	4	1	15.7188	0.00283446	0.00205125	2.26511	0.996703	PM54	CM55	97900.3	Reversed Sequence 37554	152.084	184.65	178.545	470.006	323.996	373.163
Q96HE7;G3V3E6;G3V5B3;G3V503	3	1	21.2408	0.00286852	0.00207207	2.77602	0.996563	PM54	CM55	55248.1	ERO1-like protein alpha OS=Homo sapiens OX=9606 GN=ERO1A PE=1 SV=2	569.616	442.664	417.326	1339.3	1039.73	1589.58
Q14240;E7EQG2;Q14240-2	16	4	89.8063	0.0028811	0.00207731	1.14375	0.99651	CM55	PM54	46630.5	Eukaryotic initiation factor 4A-II OS=Homo sapiens OX=9606 GN=EIF4A2 PE=1 SV=2	2455.33	2405.88	2399.61	2152.25	2035.01	2161
Q9ULB4	2	1	8.3473	0.00291542	0.00209819	1.57777	0.996364	CM55	PM54	89031.8	Cadherin-9 OS=Homo sapiens OX=9606 GN=CDH9 PE=2 SV=2	1999.02	1946.45	1845.89	1142.17	1392.44	1135.98
P11586;F5H2F4;V9GYY3	15	2	78.2626	0.00293163	0.00210569	1.48457	0.996294	PM54	CM55	102244	C-1-tetrahydrofolate synthase_ cytoplasmic OS=Homo sapiens OX=9606 GN=MTHFD1 PE=1 SV=3	508.644	467.951	425.812	706.201	726.091	649.682
Q8NCM8;Q8NCM8-2;H0YDE0;Q8NCM8-3	36	6	165.859	0.00293921	0.00210569	1.87437	0.996262	PM54	CM55	496101	Cytoplasmic dynein 2 heavy chain 1 OS=Homo sapiens OX=9606 GN=DYNC2H1 PE=1 SV=4	518.122	440.183	610.376	991.514	1019.98	928.796
Q8NEY1;Q8NEY1-3;Q8NEY1-2;A0A0A0MRJ3;Q8NEY1-4;Q8NEY1-7;Q8NEY1-5;Q8NEY1-6	10	1	39.3707	0.00294201	0.00210569	3.54505	0.996249	CM55	PM54	203213	Neuron navigator 1 OS=Homo sapiens OX=9606 GN=NAV1 PE=1 SV=2	285.408	225.569	283.557	99.8251	52.7088	71.5908
Q9NPP4	5	1	19.8576	0.00295223	0.00210914	2.08446	0.996205	CM55	PM54	117471	NLR family CARD domain-containing protein 4 OS=Homo sapiens OX=9606 GN=NLRC4 PE=1 SV=2	325.879	376.956	307.211	159.075	135.65	189.835
P17301;D6RG08	16	1	104.553	0.00296775	0.00211216	2.86963	0.996136	CM55	PM54	130550	Integrin alpha-2 OS=Homo sapiens OX=9606 GN=ITGA2 PE=1 SV=1	254.157	368.807	346.241	137.665	107.698	92.3825
Q6NVV1	2	1	14.8851	0.0029693	0.00211216	2.01614	0.996129	PM54	CM55	12191.7	Putative 60S ribosomal protein L13a protein RPL13AP3 OS=Homo sapiens OX=9606 GN=RPL13AP3 PE=5 SV=1	88.8839	79.7978	68.2586	136.04	174.87	166.797
C9JL85;P58546	2	2	15.6606	0.00297267	0.00211216	1.20479	0.996114	CM55	PM54	5761.52	Myotrophin OS=Homo sapiens OX=9606 GN=MTPN PE=1 SV=1	8142.06	7707.06	8345.15	6477.24	6844.52	6759.95
P29320;C9JXA2	2	1	9.1673	0.00299097	0.0021213	19.196	0.996032	PM54	CM55	111785	Ephrin type-A receptor 3 OS=Homo sapiens OX=9606 GN=EPHA3 PE=1 SV=2	7.199	26.0729	24.9562	372.409	507.289	238.048
A8MTZ7	2	1	8.6716	0.00300657	0.00212851	8.98885	0.995962	PM54	CM55	30640	Uncharacterized protein C12orf71 OS=Homo sapiens OX=9606 GN=C12orf71 PE=4 SV=3	7.97638	22.9984	21.3709	141.15	139.065	190.313
Q9C040;Q9C040-2;A0A0J9YX34;A0A0J9YW70;A0A0J9YXY2;C9JVI3	3	2	13.618	0.00307992	0.00216906	1.80698	0.995621	CM55	PM54	82556.8	Tripartite motif-containing protein 2 OS=Homo sapiens OX=9606 GN=TRIM2 PE=1 SV=1	961.152	936.986	1074.47	578.805	461.871	604.4
C9JDM3;C9JJ34;F6WQW2;P43487;P43487-2;C9JGV6;C9JIC6;C9JXG8	2	2	13.4431	0.00308124	0.00216906	1.54065	0.995615	CM55	PM54	19044.6	Ran-specific GTPase-activating protein (Fragment) OS=Homo sapiens OX=9606 GN=RANBP1 PE=1 SV=8	1468.52	1603.93	1758.11	1096.49	957.387	1081.52
REVERSE14886	8	1	32.0333	0.00309063	0.00216906	1.46505	0.99557	CM55	PM54	167868	Reversed Sequence 14886	183.532	176.711	213.51	127.288	133.261	131.078
Q02878;F8VZ45;U3KQR5;F8VR69;F8VU16;F8VWR1;F8VZA3	5	2	26.7789	0.00309203	0.00216906	1.71944	0.995563	PM54	CM55	32785	60S ribosomal protein L6 OS=Homo sapiens OX=9606 GN=RPL6 PE=1 SV=3	368.111	309.265	394.4	592.561	579.67	670.623
K7EKI8;O60437;K7EQ71	12	3	52.5307	0.00309251	0.00216906	1.2627	0.995561	CM55	PM54	205060	Periplakin OS=Homo sapiens OX=9606 GN=PPL PE=1 SV=1	885.004	954.05	973.894	710.719	763.652	753.363
H0YCK3;P55265;P55265-2;P55265-3;P55265-4;P55265-5	4	1	16.8091	0.0031028	0.00216906	1.53805	0.995512	PM54	CM55	133845	Double-stranded RNA-specific adenosine deaminase (Fragment) OS=Homo sapiens OX=9606 GN=ADAR PE=1 SV=1	1010.64	835.154	871.151	1479.54	1308.45	1390.81
Q9NR48;Q9NR48-2;F8VWK7	19	6	104.763	0.00310815	0.00216906	1.93125	0.995486	CM55	PM54	336383	Histone-lysine N-methyltransferase ASH1L OS=Homo sapiens OX=9606 GN=ASH1L PE=1 SV=2	386.448	342.023	302.985	187.111	152.375	194.601
G3XAE9;Q9Y4F4;Q9Y4F4-2;Q9Y4F4-3;G3V3B1;H0YJ89	9	1	38.5592	0.00310825	0.00216906	9.90732	0.995486	PM54	CM55	196689	KIAA0423_ isoform CRA_a OS=Homo sapiens OX=9606 GN=TOGARAM1 PE=1 SV=1	56.6274	34.0497	15.5728	366.029	375.271	311.351
REVERSE34939	1	1	3.8946	0.00311574	0.00216949	1.54542	0.995449	CM55	PM54	55848.8	Reversed Sequence 34939	1508.57	1644.64	1758.31	1121.44	952.258	1104.42
C9JFR7;P99999	3	1	17.9802	0.00311997	0.00216949	2.6005	0.995429	PM54	CM55	11447.4	Cytochrome c (Fragment) OS=Homo sapiens OX=9606 GN=CYCS PE=1 SV=1	243.448	144.644	200.19	521.212	486.878	521.739
REVERSE13632	5	1	19.3574	0.00318146	0.00220831	3.32054	0.995125	CM55	PM54	156561	Reversed Sequence 13632	662.028	934.71	806.562	281.512	272.66	169.597
D6RER5;D6RGI3;Q9NVA2;Q9NVA2-2;D6R9Y6;D6RDP1;D6RDU5;H0Y961;H0Y9G8	7	2	41.4512	0.00321197	0.00222554	1.17536	0.994971	PM54	CM55	50151	Septin-11 OS=Homo sapiens OX=9606 GN=SEPT11 PE=1 SV=1	527.311	518.905	512.432	583.636	614.362	633.979
P15531;P15531-2;E7ERL0;E5RHP0;C9K028;D6RJC3;E9PG59;E9PHC0	13	4	56.8658	0.00321971	0.00222695	1.70173	0.994931	PM54	CM55	17319.8	Nucleoside diphosphate kinase A OS=Homo sapiens OX=9606 GN=NME1 PE=1 SV=1	530.046	648.533	661.768	1096.85	949.744	1085.18
P53396;P53396-2;P53396-3;K7ESG8	23	10	141.017	0.00330911	0.00228279	1.11784	0.994462	PM54	CM55	121752	ATP-citrate synthase OS=Homo sapiens OX=9606 GN=ACLY PE=1 SV=3	1554.46	1485.16	1478.17	1690.92	1701.11	1658.13
REVERSE4742	2	1	8.8203	0.00331212	0.00228279	148.599	0.994446	CM55	PM54	67942.1	Reversed Sequence 4742	300.17	450.296	347.486	0	7.38869	0
Q5VZ66	1	1	3.6622	0.00331942	0.0022838	1.25657	0.994407	CM55	PM54	98700.3	Janus kinase and microtubule-interacting protein 3 OS=Homo sapiens OX=9606 GN=JAKMIP3 PE=2 SV=2	2163.68	2063.21	2306.32	1786.74	1725.77	1686.73
P61978;P61978-2;P61978-3;Q5T6W2;S4R359;S4R457	16	12	118.183	0.00335424	0.0023037	1.31721	0.994217	CM55	PM54	51261.5	Heterogeneous nuclear ribonucleoprotein K OS=Homo sapiens OX=9606 GN=HNRNPK PE=1 SV=1	7268.84	7760.06	8087.33	5863.48	5526.44	6159.44
Q9UBZ9;Q9UBZ9-2;Q9UBZ9-3	2	1	12.9618	0.0033747	0.00231368	2.26809	0.994104	CM55	PM54	139446	DNA repair protein REV1 OS=Homo sapiens OX=9606 GN=REV1 PE=1 SV=1	191.674	154.102	180.007	96.0146	69.2007	66.6023
Q07065	44	31	262.982	0.00343332	0.00234843	1.13226	0.993775	CM55	PM54	66136.6	Cytoskeleton-associated protein 4 OS=Homo sapiens OX=9606 GN=CKAP4 PE=1 SV=2	14454.5	14530.4	14178.4	12878.9	12242.8	12999.5
Q86Y82;B1AJQ6	4	2	29.3257	0.00343741	0.00234843	1.16883	0.993752	PM54	CM55	31756	Syntaxin-12 OS=Homo sapiens OX=9606 GN=STX12 PE=1 SV=1	908.894	924.216	936.382	1053.48	1053.16	1130.41
O60346;O60346-2	2	1	8.0571	0.00345268	0.002354	2.33237	0.993664	CM55	PM54	187068	PH domain leucine-rich repeat-containing protein phosphatase 1 OS=Homo sapiens OX=9606 GN=PHLPP1 PE=1 SV=3	1036.37	948.215	695.286	421.734	384.428	342.828
Q86WI1	8	1	35.3132	0.00345761	0.002354	5.95223	0.993636	PM54	CM55	470582	Fibrocystin-L OS=Homo sapiens OX=9606 GN=PKHD1L1 PE=2 SV=2	64.9418	29.8673	79.2557	317.644	366.202	352.228
P50395;P50395-2;Q5SX87;Q5SX90;V9GYF8;Q5SX86;Q5SX91;V9GYJ7	21	11	130.572	0.0034882	0.0023707	1.21965	0.993459	CM55	PM54	51119.6	Rab GDP dissociation inhibitor beta OS=Homo sapiens OX=9606 GN=GDI2 PE=1 SV=2	2482.41	2406.53	2587.42	2110.87	1947.3	2071.74
P47755;F8W9N7;A0A0D9SET8;C9JUG7;P47755-2;F8WED3	7	2	31.3333	0.00353695	0.00239966	1.26532	0.993171	CM55	PM54	33177.2	F-actin-capping protein subunit alpha-2 OS=Homo sapiens OX=9606 GN=CAPZA2 PE=1 SV=3	721.73	766.911	779.503	610.229	562.273	620.042
A0A0D9SFL3;B0QYK0;C9JGE3;Q01844;Q01844-2;Q01844-3;Q01844-5;Q01844-6	1	1	5.7133	0.00358546	0.00242835	2.97671	0.992878	CM55	PM54	61700	RNA-binding protein EWS OS=Homo sapiens OX=9606 GN=EWSR1 PE=1 SV=1	275.05	339.927	339.33	136.689	76.7151	107.187
REVERSE10418	15	3	69.3455	0.00370393	0.00250425	2.31755	0.992139	PM54	CM55	154179	Reversed Sequence 10418	109.013	141.383	91.023	234.709	271.755	284.793
P13667	15	11	97.0928	0.00372149	0.00251178	1.48012	0.992027	CM55	PM54	73274.7	Protein disulfide-isomerase A4 OS=Homo sapiens OX=9606 GN=PDIA4 PE=1 SV=2	2978.68	2626.29	3172.01	1851.8	2054.88	2023.22
A0A087X2A7;Q8NB25;Q8NB25-3;Q8NB25-2;H7BY63;Q8NB25-4;E7EQ67;H0Y672	9	1	39.0327	0.00377489	0.00254343	1.41345	0.991679	CM55	PM54	128722	Protein FAM184A OS=Homo sapiens OX=9606 GN=FAM184A PE=1 SV=1	6816.45	5775.29	5921.86	4288.78	4575.2	4234.15
P30559	4	2	27.1527	0.00380839	0.00256158	1.90582	0.991458	PM54	CM55	43570	Oxytocin receptor OS=Homo sapiens OX=9606 GN=OXTR PE=2 SV=2	293.429	244.004	220.764	476.926	427.63	540.433
A0A2R8YEQ5;Q5QGS0;H7C2N8	4	1	24.0894	0.00383018	0.00257055	1.37191	0.991313	CM55	PM54	165632	Neurite extension and migration factor OS=Homo sapiens OX=9606 GN=NEXMIF PE=1 SV=1	1769.67	1802.98	1774.21	1173.75	1404.81	1318.84
P45880;A0A0A0MR02;P45880-1;P45880-2;Q5JSD1;Q5JSD2;A2A3S1	6	4	38.8014	0.00383488	0.00257055	1.21462	0.991281	CM55	PM54	32079.8	Voltage-dependent anion-selective channel protein 2 OS=Homo sapiens OX=9606 GN=VDAC2 PE=1 SV=2	1013.14	922.072	1016.56	810.681	805.323	814.197
B5MCP9;P62081;A0A2R8Y623	4	3	26.7462	0.00386557	0.00258669	5.01413	0.991074	PM54	CM55	21311.9	40S ribosomal protein S7 OS=Homo sapiens OX=9606 GN=RPS7 PE=1 SV=1	49.1411	38.6066	96.0902	292.912	280.75	348.125
H7C4U6;H7C5G0	1	1	4.4596	0.00389838	0.00260174	2.45405	0.99085	CM55	PM54	19523	Arf-GAP with GTPase_ ANK repeat and PH domain-containing protein 3 (Fragment) OS=Homo sapiens OX=9606 GN=AGAP3 PE=1 SV=1	1525.51	1744.07	1111.5	671.628	562.171	551.443
REVERSE20930	3	1	13.6961	0.00391903	0.00260174	1.41217	0.990708	CM55	PM54	46395.7	Reversed Sequence 20930	969.264	1104.37	961.837	667.73	753.959	727.813
A0A087WUS0;A0A2R8Y849;A0A2R8YD14;E7ETK0;P62847;P62847-2;P62847-3;P62847-4;A0A2R8Y8A0	3	1	18.4267	0.00391917	0.00260174	2.74565	0.990707	PM54	CM55	15353.2	40S ribosomal protein S24 OS=Homo sapiens OX=9606 GN=RPS24 PE=1 SV=1	97.7378	80.2584	142.527	315.291	290.824	273.93
REVERSE4955	2	2	8.6088	0.00392487	0.00260174	2.48394	0.990667	PM54	CM55	51979.4	Reversed Sequence 4955	56.1954	45.8415	63.1587	150.54	153.369	106.428
P62805	28	24	91.7532	0.00392622	0.00260174	1.13657	0.990658	CM55	PM54	11367.4	Histone H4 OS=Homo sapiens OX=9606 GN=HIST1H4A PE=1 SV=2	23569.5	25230.5	24155.9	21328.3	21151	21710
REVERSE34328	2	1	9.1229	0.00392802	0.00260174	135.055	0.990645	PM54	CM55	244485	Reversed Sequence 34328	8.74294	0	0	378.015	411.255	391.512
Q9UNH7;A0A0A0MRI2;Q9UNH7-2	3	1	14.6352	0.00394056	0.00260563	2.38324	0.990558	CM55	PM54	46934	Sorting nexin-6 OS=Homo sapiens OX=9606 GN=SNX6 PE=1 SV=1	566.271	547.089	514.878	203.361	296.598	183.243
E9PHI4;H0Y6N5;H0Y742;O94901;O94901-5;O94901-6;O94901-8;O94901-9;H7C2K3	3	1	12.5798	0.0039583	0.00261294	4.34483	0.990434	CM55	PM54	91911.6	SUN domain-containing protein 1 OS=Homo sapiens OX=9606 GN=SUN1 PE=1 SV=1	202.139	252.547	158.841	55.561	56.0353	29.6122
P12236;P12235	9	3	71.0242	0.00406125	0.00267638	1.32099	0.9897	PM54	CM55	33094.4	ADP/ATP translocase 3 OS=Homo sapiens OX=9606 GN=SLC25A6 PE=1 SV=4	538.484	490.314	495.717	659.652	635.553	718.672
P14868;P14868-2;H7BZ35;H7C278;C9J7S3;C9JLC1	7	2	41.0845	0.00409788	0.00269598	1.7728	0.989433	PM54	CM55	57535.5	Aspartate--tRNA ligase_ cytoplasmic OS=Homo sapiens OX=9606 GN=DARS PE=1 SV=2	1135.39	1288.64	1535.13	2175.42	2529.96	2313.42
Q9P2J5;Q9P2J5-2;Q9P2J5-3;A0A087WXY1	13	3	62.6033	0.00413023	0.00271269	1.5615	0.989194	PM54	CM55	135664	Leucine--tRNA ligase_ cytoplasmic OS=Homo sapiens OX=9606 GN=LARS PE=1 SV=2	147.602	144.831	131.627	220.636	195.609	245.923
P05387;H0YDD8	7	5	44.0318	0.00415315	0.00272189	1.20032	0.989024	CM55	PM54	11665	60S acidic ribosomal protein P2 OS=Homo sapiens OX=9606 GN=RPLP2 PE=1 SV=1	4516.92	4240.59	4062.39	3568.17	3561.85	3550.38
REVERSE7623	9	2	46.3332	0.00415913	0.00272189	3.91708	0.988979	CM55	PM54	168751	Reversed Sequence 7623	88.0081	114.247	55.8308	20.5265	25.8006	19.5602
REVERSE26926	8	1	33.5573	0.00416512	0.00272189	2.18618	0.988935	CM55	PM54	141960	Reversed Sequence 26926	424.435	479.207	577.488	207.847	271.777	197.873
P30044;P30044-3;P30044-2;P30044-4	9	5	51.321	0.00419636	0.00273349	1.30984	0.9887	CM55	PM54	22314.6	Peroxiredoxin-5_ mitochondrial OS=Homo sapiens OX=9606 GN=PRDX5 PE=1 SV=4	1836.85	1722.46	1712.66	1270.92	1304.06	1449.9
Q70CQ4;I3L4X5;Q70CQ4-2	5	1	26.5605	0.00419687	0.00273349	2.41245	0.988696	CM55	PM54	148420	Ubiquitin carboxyl-terminal hydrolase 31 OS=Homo sapiens OX=9606 GN=USP31 PE=2 SV=2	546.38	491.624	414.523	254.072	166.85	181.173
Q9Y238-3;Q9Y238	4	1	20.0537	0.00421461	0.00274047	2.57257	0.988561	CM55	PM54	200293	Isoform 3 of Deleted in lung and esophageal cancer protein 1 OS=Homo sapiens OX=9606 GN=DLEC1	352.229	307.646	369.272	135.085	97.9305	167.031
Q92614;A0A0D9SFK2;Q92614-2;Q92614-4;Q92614-5;Q92614-3;H0YEV9;A0A1B0GWJ6	18	1	76.2105	0.00422367	0.0027418	4.09869	0.988492	PM54	CM55	234313	Unconventional myosin-XVIIIa OS=Homo sapiens OX=9606 GN=MYO18A PE=1 SV=3	26.2794	42.655	62.5638	177.578	180.04	181.352
C9IZG4;O60888;O60888-2;O60888-3;C9IZQ5	2	1	13.7064	0.00423919	0.00274731	1.58195	0.988374	PM54	CM55	14685.8	Protein CutA OS=Homo sapiens OX=9606 GN=CUTA PE=1 SV=1	846.741	979.541	898.156	1494.54	1557.41	1257.97
Q8IW52	8	1	34.5681	0.00433611	0.00280547	2.91726	0.987622	PM54	CM55	95414.6	SLIT and NTRK-like protein 4 OS=Homo sapiens OX=9606 GN=SLITRK4 PE=1 SV=1	97.523	76.9945	56.1241	185	255.978	231.864
Q9H094;Q9H094-2;Q9H094-3;Q9H094-5;Q9H094-4	3	1	20.1807	0.00436608	0.0028202	14.221	0.987385	CM55	PM54	73749.4	Neuroblastoma breakpoint family member 3 OS=Homo sapiens OX=9606 GN=NBPF3 PE=2 SV=1	197.976	149.53	93.1072	18.7104	8.02173	4.25117
REVERSE4237	8	2	34.6616	0.00437458	0.00282102	1.38409	0.987317	CM55	PM54	221133	Reversed Sequence 4237	1542.44	1626.48	1603.6	1267.11	1128.75	1052.28
Q15185;A0A087WYT3;Q15185-3;Q15185-4;Q15185-2;B4DDC6	4	2	40.2933	0.00440427	0.00283549	1.37051	0.987081	CM55	PM54	18982.6	Prostaglandin E synthase 3 OS=Homo sapiens OX=9606 GN=PTGES3 PE=1 SV=1	2680.73	2227.32	2430.63	1802.06	1788.85	1763.79
P09525;Q6P452;P09525-2;B4E1S2	9	5	54.3346	0.00441257	0.00283616	1.27216	0.987014	CM55	PM54	36110.9	Annexin A4 OS=Homo sapiens OX=9606 GN=ANXA4 PE=1 SV=4	1354.26	1281.06	1207.86	1024.48	1038.76	957.762
O43795;E9PDF6;O43795-2;E7EQD9;C9JYW1;C9JUP5;C9K0I9;H7C2Y7	16	3	81.7768	0.00445367	0.00285427	2.26126	0.986682	PM54	CM55	133012	Unconventional myosin-Ib OS=Homo sapiens OX=9606 GN=MYO1B PE=1 SV=3	212.125	133.369	190.956	394.181	431.075	387.796
REVERSE2047	7	1	28.2367	0.00445535	0.00285427	2.34877	0.986669	CM55	PM54	121193	Reversed Sequence 2047	554.308	674.955	869.065	332.72	265.489	295.163
Q8IZJ3;Q8IZJ3-2	2	2	6.8396	0.00454325	0.00290478	3.97688	0.985947	PM54	CM55	208755	C3 and PZP-like alpha-2-macroglobulin domain-containing protein 8 OS=Homo sapiens OX=9606 GN=CPAMD8 PE=1 SV=2	429.354	188.481	350.866	1306.95	1203.49	1341.97
P35228	3	2	11.2351	0.0045573	0.00290478	1.83127	0.98583	CM55	PM54	132657	Nitric oxide synthase_ inducible OS=Homo sapiens OX=9606 GN=NOS2 PE=1 SV=2	419.611	377.5	522.568	224.163	238.523	257.952
Q6DRA6;Q6DN03	4	1	19.8498	0.00455909	0.00290478	2.39825	0.985815	PM54	CM55	18417.3	Putative histone H2B type 2-D OS=Homo sapiens OX=9606 GN=HIST2H2BD PE=5 SV=3	316.381	474.395	528.999	1057.18	1057.6	1050.37
Q9Y490	74	46	498.674	0.00456392	0.00290478	1.29114	0.985775	CM55	PM54	271935	Talin-1 OS=Homo sapiens OX=9606 GN=TLN1 PE=1 SV=3	6021.06	6129.16	6309.31	4960.21	4368.03	4968.87
P62701;Q8TD47	11	6	78.4364	0.00465823	0.00295702	1.21598	0.984979	CM55	PM54	29825.9	40S ribosomal protein S4_ X isoform OS=Homo sapiens OX=9606 GN=RPS4X PE=1 SV=2	6977.69	7010.72	6826.78	6093.8	5522.07	5502.12
REVERSE39770	8	1	38.4619	0.00466113	0.00295702	57.186	0.984954	PM54	CM55	139321	Reversed Sequence 39770	0	0	4.90598	106.934	105.647	67.9722
Q5T5P2;Q5T5P2-10;Q5T5P2-3;Q5T5P2-7;Q5T5P2-2;Q5T5P1;Q5T5P2-9	10	2	47.1617	0.00474019	0.0030023	1.61983	0.984273	CM55	PM54	214743	Sickle tail protein homolog OS=Homo sapiens OX=9606 GN=KIAA1217 PE=1 SV=2	796.831	920.561	873.207	495.773	488.443	615.089
Q14126	5	1	18.3464	0.00482355	0.00305015	1.31494	0.983542	PM54	CM55	123092	Desmoglein-2 OS=Homo sapiens OX=9606 GN=DSG2 PE=1 SV=2	262.158	290.228	247.015	354.831	354.904	341.432
P07384;E9PJA6;E9PJJ3;E9PLC9;E9PLX0;E9PMC6;E9PQB3;E9PRM1;E9PSA6;E9PIA9	18	4	125.195	0.00485548	0.00306403	1.13975	0.983258	CM55	PM54	82517.5	Calpain-1 catalytic subunit OS=Homo sapiens OX=9606 GN=CAPN1 PE=1 SV=1	3200.71	3130.19	3087.34	2821.2	2800.11	2642.09
REVERSE31763	9	1	31.4752	0.00486118	0.00306403	1.32743	0.983207	CM55	PM54	239054	Reversed Sequence 31763	4291.88	3898.78	4392.63	2951.19	3307.54	3220.72
O75165;H0Y8Q2	20	2	100.113	0.00488897	0.00307659	1.27791	0.982959	CM55	PM54	256696	DnaJ homolog subfamily C member 13 OS=Homo sapiens OX=9606 GN=DNAJC13 PE=1 SV=5	507.808	482.815	445.877	389.597	362.384	372.119
Q969Q6;Q969Q6-2;H0YJC5;H0YJV0	2	1	10.4557	0.00490668	0.00308276	187.618	0.9828	CM55	PM54	53601	Serine/threonine-protein phosphatase 2A regulatory subunit B'' subunit gamma OS=Homo sapiens OX=9606 GN=PPP2R3C PE=1 SV=1	1612.59	1497	1364.88	6.49041	0	17.3583
Q16720;Q16720-2;Q16720-5;Q16720-7;Q16720-3;Q16720-4;Q16720-6;Q16720-8	12	1	68.7324	0.00495133	0.00310582	32.8077	0.982396	PM54	CM55	135338	Plasma membrane calcium-transporting ATPase 3 OS=Homo sapiens OX=9606 GN=ATP2B3 PE=1 SV=3	21.7379	48.7879	4.68151	873.946	897.502	695.928
P18206;P18206-2;P18206-3;A0A096LPE1	46	32	282.473	0.00501693	0.00314193	1.17727	0.981796	CM55	PM54	124370	Vinculin OS=Homo sapiens OX=9606 GN=VCL PE=1 SV=4	7766.59	7691.49	8305.75	6796.57	6515.59	6873.34
REVERSE13690	4	1	19.7602	0.00512819	0.00320647	1.22963	0.980761	CM55	PM54	80383.1	Reversed Sequence 13690	4533.63	4651.73	4247.01	3816.41	3609.17	3498.35
Q8WYN3;J3KQ49;Q8WYN3-2;B8ZZD9;E7EN18	6	2	23.2093	0.00523356	0.00326347	1.32208	0.979761	PM54	CM55	66040.6	Cysteine/serine-rich nuclear protein 3 OS=Homo sapiens OX=9606 GN=CSRNP3 PE=2 SV=1	629.983	626.653	627.192	843.438	753.564	893.572
REVERSE6434	3	1	11.8206	0.00523606	0.00326347	1.45862	0.979737	CM55	PM54	52890.9	Reversed Sequence 6434	419.963	424.98	419.654	261.294	276.844	328.843
Q13561;Q13561-2;Q13561-3;H0YI98;F8W1I6;F8VW18;H0YHL1;F8VRV7;F8VX93	7	5	48.1963	0.00527609	0.00328129	1.27644	0.979352	CM55	PM54	44345.1	Dynactin subunit 2 OS=Homo sapiens OX=9606 GN=DCTN2 PE=1 SV=4	1613.32	1704.87	1864.62	1364.15	1320.76	1375.47
B7ZAR1;E9PCA1;P48643;E7ENZ3;P48643-2	14	4	78.9246	0.00528721	0.00328129	1.35758	0.979245	PM54	CM55	55805.3	cDNA_ FLJ79275_ highly similar to T-complex protein 1 subunit epsilon OS=Homo sapiens OX=9606 GN=CCT5 PE=1 SV=1	1060.29	1131.13	963.612	1491.98	1345.59	1445.63
Q01538;Q01538-2;A0A0G2JS52;Q6P6D5	8	1	32.5756	0.00528984	0.00328129	1.49134	0.979219	PM54	CM55	123983	Myelin transcription factor 1 OS=Homo sapiens OX=9606 GN=MYT1 PE=1 SV=2	967.599	936.967	966.329	1497.87	1549.46	1234.14
Q9Y4E6;Q9Y4E6-2;A2RRE0;K7EMF3	7	3	35.4489	0.00530045	0.00328266	1.35699	0.979117	PM54	CM55	166263	WD repeat-containing protein 7 OS=Homo sapiens OX=9606 GN=WDR7 PE=1 SV=2	520.974	520.142	458.937	630.206	703.342	702.006
P59923	3	1	13.6533	0.0053267	0.0032937	2.31847	0.978862	PM54	CM55	121358	Zinc finger protein 445 OS=Homo sapiens OX=9606 GN=ZNF445 PE=1 SV=1	54.4344	72.6768	56.9298	135.114	115.717	175.863
Q15413;A0A087X080;A0A0U1RRH1;A0A0X1KG73;Q15413-2;Q15413-3;A0A0U1RR54;A0A1B0GUB0;A0A1B0GTF2;A0A1B0GTT7	27	2	128.122	0.00534521	0.00329992	1.19298	0.978681	CM55	PM54	558145	Ryanodine receptor 3 OS=Homo sapiens OX=9606 GN=RYR3 PE=1 SV=3	530.558	590.854	558.981	464.693	467.593	476.281
Q5T4S7;Q5T4S7-2;Q5T4S7-3;Q5T4S7-4;X6R960	26	5	101.744	0.00536056	0.00330418	1.26531	0.978531	CM55	PM54	580913	E3 ubiquitin-protein ligase UBR4 OS=Homo sapiens OX=9606 GN=UBR4 PE=1 SV=1	1633.18	1712.61	1487.6	1296.3	1271.38	1252.26
Q6ZMW3;Q6ZMW3-2	9	1	43.4568	0.00537136	0.00330563	2.67824	0.978426	PM54	CM55	220409	Echinoderm microtubule-associated protein-like 6 OS=Homo sapiens OX=9606 GN=EML6 PE=2 SV=2	90.0171	70.7931	76.938	201.872	158.501	276.373
Q9Y5M8;C9J5Z8;H7C4H2	5	1	27.7971	0.00542041	0.00333057	5.24794	0.977943	PM54	CM55	29930.4	Signal recognition particle receptor subunit beta OS=Homo sapiens OX=9606 GN=SRPRB PE=1 SV=3	61.7713	37.2307	106.671	354.313	304.537	420.51
A0A087X0K1;Q9Y376	2	1	8.3757	0.00542902	0.00333062	1.21171	0.977858	PM54	CM55	39623.8	Calcium-binding protein 39 OS=Homo sapiens OX=9606 GN=CAB39 PE=1 SV=1	11399.5	10478.7	11212.5	12875.8	13251.7	13968.9
Q9NR45;Q5TBR0;Q5TBR1	4	2	24.9105	0.00546917	0.00334999	1.869	0.977459	CM55	PM54	40763.8	Sialic acid synthase OS=Homo sapiens OX=9606 GN=NANS PE=1 SV=2	1209.49	909.58	841.274	505.915	539.014	538.985
REVERSE21909	5	2	19.9244	0.00554272	0.00338973	1.34767	0.976723	PM54	CM55	127636	Reversed Sequence 21909	678.549	772.316	728.887	963.94	919.567	1054.07
REVERSE606	2	1	8.1616	0.00561324	0.00342198	1.62967	0.97601	CM55	PM54	43206.9	Reversed Sequence 606	742.155	937.386	787.697	537.071	526.914	449.966
REVERSE22267	2	1	8.4852	0.00561542	0.00342198	2.5968	0.975987	CM55	PM54	111655	Reversed Sequence 22267	497.05	475.136	296.377	175.436	149.519	163.554
P84095	3	1	20.6236	0.0056222	0.00342198	1.34422	0.975918	CM55	PM54	21764.7	Rho-related GTP-binding protein RhoG OS=Homo sapiens OX=9606 GN=RHOG PE=1 SV=1	204.74	204.973	214.263	140.833	154.146	169.212
P28066;P28066-2	5	3	31.1785	0.00563379	0.00342198	1.2367	0.9758	CM55	PM54	26582.2	Proteasome subunit alpha type-5 OS=Homo sapiens OX=9606 GN=PSMA5 PE=1 SV=3	1121.33	1226.68	1277.81	967.705	986.035	978.103
P61353;K7ELC7	10	8	54.7179	0.00563924	0.00342198	1.19622	0.975745	PM54	CM55	15797.8	60S ribosomal protein L27 OS=Homo sapiens OX=9606 GN=RPL27 PE=1 SV=2	1323.43	1445.21	1390.04	1591.23	1674.95	1708.53
I3VM54;Q9Y2K7	2	1	7.7763	0.00565745	0.00342531	1.48575	0.975559	CM55	PM54	133113	Lysine-specific demethylase 2A OS=Homo sapiens OX=9606 GN=KDM2A PE=1 SV=1	300.195	312.299	270.475	203.657	175.888	214.749
Q07812;Q07812-2;Q07812-5;Q07812-7;Q07812-8;K4JQN1	2	2	13.2777	0.00566225	0.00342531	1.37047	0.975509	PM54	CM55	21298.5	Apoptosis regulator BAX OS=Homo sapiens OX=9606 GN=BAX PE=1 SV=1	403.861	452.108	457.639	569.431	651.776	579.058
Q15417;Q15417-2;Q15417-3;E9PDU6	16	9	98.7252	0.00568027	0.0034309	1.15498	0.975325	PM54	CM55	36584.9	Calponin-3 OS=Homo sapiens OX=9606 GN=CNN3 PE=1 SV=1	1751.49	1634.79	1661.42	1892.16	2003.84	1933.99
A6QL64;A0A087X1R3;A0A1W2PNQ7;A6QL64-3;A0A087WX87;A0A087X037;A0A1W2PS33;A6QL64-4;A6QL64-5;Q8N2N9-4	14	2	80.6343	0.0057108	0.00343975	1.5895	0.975011	CM55	PM54	219290	Ankyrin repeat domain-containing protein 36A OS=Homo sapiens OX=9606 GN=ANKRD36 PE=2 SV=3	2754.86	2783.93	2870.78	2020.43	1771.21	1499.07
E7ERX9;Q9NQT8	4	1	17.2331	0.00571253	0.00343975	1.28085	0.974993	PM54	CM55	84391.1	Kinesin-like protein OS=Homo sapiens OX=9606 GN=KIF13B PE=1 SV=1	2407.73	2092.67	2215.19	2826.19	2990.04	2785.46
REVERSE40220	6	1	26.5427	0.00572669	0.00344297	1.52434	0.974847	CM55	PM54	310573	Reversed Sequence 40220	2899.44	2875.58	2379.31	1794.77	1910	1644.65
A8MTE9;C9J1D2;E9PIS6;H0YDB4;J3KR69;Q9H892;Q9H892-2	1	1	8.2898	0.00593605	0.00356089	3.74872	0.972653	PM54	CM55	76388.4	Tetratricopeptide repeat protein 12 OS=Homo sapiens OX=9606 GN=TTC12 PE=1 SV=1	117.263	56.399	127.394	376.537	379.086	372.952
A0A0A0MR46;Q6ZP01	6	2	25.0575	0.00594105	0.00356089	1.24339	0.9726	PM54	CM55	119313	RNA-binding protein 44 OS=Homo sapiens OX=9606 GN=RBM44 PE=1 SV=1	1564.39	1479.02	1363.85	1854.71	1833.58	1791.63
O95816;O95816-2	2	1	15.4416	0.00597779	0.00357743	1.81486	0.972209	CM55	PM54	23943.1	BAG family molecular chaperone regulator 2 OS=Homo sapiens OX=9606 GN=BAG2 PE=1 SV=1	145.246	176.431	132.907	96.2476	77.0475	77.1845
REVERSE24576	5	1	25.1109	0.00603909	0.00360858	1.35312	0.971552	CM55	PM54	113039	Reversed Sequence 24576	1568.99	1619.14	1634.01	1125.84	1113.23	1324.66
P61586;C9JNR4;C9JX21;Q5JR05;Q5JR07;C9JRM1;E9PLA2;E9PN11;Q5JR06;U3KQA9;U3KQV3	11	6	48.1577	0.00611861	0.003648	1.20406	0.970694	CM55	PM54	22110.3	Transforming protein RhoA OS=Homo sapiens OX=9606 GN=RHOA PE=1 SV=1	2661.33	2940.23	2748.16	2395.49	2293.56	2245.6
A2A3F3;A2A3F4;A2A3F7;E9PBI7;G5E9G1;H7BYP1;Q9HCF6;Q9HCF6-11;Q9HCF6-2;Q9HCF6-3;Q9HCF6-4;Q9HCF6-5;Q9HCF6-6;Q9HCF6-7;Q9HCF6-8;Q9HCF6-10;Q4VXD4;Q504Y1;Q9HCF6-12;H0Y3D4	4	1	24.6046	0.00613146	0.003648	3.82149	0.970554	CM55	PM54	180021	Transient receptor potential cation channel subfamily M member 3 OS=Homo sapiens OX=9606 GN=TRPM3 PE=1 SV=1	320.939	330.037	373.438	71.4288	138.62	58.0184
REVERSE29918	5	2	23.5481	0.00613307	0.003648	11.4085	0.970537	PM54	CM55	122732	Reversed Sequence 29918	13.9801	62.2331	60.8873	472.394	521.324	570.391
Q9NR12;Q9NR12-2;D6RAN1;D6RF83;D6RH06;H7BYK4;Q9NR12-3;Q9NR12-4;Q9NR12-5;Q9NR12-6	7	5	44.7185	0.00621367	0.00369033	1.1551	0.969657	PM54	CM55	50928.3	PDZ and LIM domain protein 7 OS=Homo sapiens OX=9606 GN=PDLIM7 PE=1 SV=1	694.76	709.901	758.35	845.859	825.349	827.278
P31689;P31689-2	1	1	4.0572	0.00628334	0.00372581	2.77058	0.96889	PM54	CM55	45609.6	DnaJ homolog subfamily A member 1 OS=Homo sapiens OX=9606 GN=DNAJA1 PE=1 SV=2	93.3586	95.2913	54.4825	237.029	245.237	191.353
A0A2R8YCS7;A0A2R8YD90;Q9Y3Z3;Q9Y3Z3-4;A0A2R8Y5D2;A0A2R8YF51;Q9Y3Z3-3;A0A2R8Y586;A0A2R8Y755;A0A2R8Y7R5;A0A2R8YG48	3	1	16.2283	0.00629248	0.00372581	1.73364	0.968789	PM54	CM55	68684.1	Deoxynucleoside triphosphate triphosphohydrolase SAMHD1 OS=Homo sapiens OX=9606 GN=SAMHD1 PE=1 SV=1	101.658	92.2351	92.6464	150.743	146.651	199.362
C9J1E5;Q92783;Q92783-2	1	1	6.6251	0.00631977	0.00372904	1.47119	0.968487	PM54	CM55	4702.21	Signal transducing adapter molecule 1 OS=Homo sapiens OX=9606 GN=STAM PE=1 SV=2	687.644	732.132	844.502	1090.73	1040.08	1200.38
E9PLK3;P55786;P55786-2;H0YDG0;A6NEC2;A6NEC2-2;E9PP11	8	2	46.5738	0.0063249	0.00372904	1.25901	0.96843	CM55	PM54	103786	Aminopeptidase OS=Homo sapiens OX=9606 GN=NPEPPS PE=1 SV=1	823.753	846.714	755.208	642.314	612.058	672.277
H0Y6E7;H3BT71;P38159;A0A1B0GUK8;H3BR27;P38159-2;P38159-3;Q96E39;H3BNC1;O75526;Q8N7X1	5	1	27.8796	0.00632656	0.00372904	4.41945	0.968412	CM55	PM54	31745.8	RNA-binding motif protein_ X chromosome (Fragment) OS=Homo sapiens OX=9606 GN=RBMX PE=1 SV=2	288.282	309.056	165.672	48.0811	82.4737	42.0937
Q8IWA5;Q8IWA5-2;Q8IWA5-3	4	2	22.9208	0.00637894	0.00375425	2.01402	0.967829	PM54	CM55	81663.5	Choline transporter-like protein 2 OS=Homo sapiens OX=9606 GN=SLC44A2 PE=1 SV=3	474.651	366.648	311.605	777.851	850.753	693.373
O15173;O15173-2	6	2	23.5164	0.0063978	0.00375969	1.30911	0.967619	CM55	PM54	23875.5	Membrane-associated progesterone receptor component 2 OS=Homo sapiens OX=9606 GN=PGRMC2 PE=1 SV=1	1686.08	1754.25	1822.41	1225.95	1355.09	1439.03
Q15758;M0QXM4;Q15758-2;Q15758-3	4	1	20.6048	0.00641211	0.00376244	3.6994	0.967459	CM55	PM54	57054.6	Neutral amino acid transporter B(0) OS=Homo sapiens OX=9606 GN=SLC1A5 PE=1 SV=2	447.072	627.017	291.177	132.067	100.047	136.937
Q9C0H5	5	2	22.6842	0.00642848	0.00376639	1.35962	0.967276	CM55	PM54	122313	Rho GTPase-activating protein 39 OS=Homo sapiens OX=9606 GN=ARHGAP39 PE=1 SV=2	2087.59	2443.34	2338.98	1791.25	1585.57	1675.98
P62937;C9J5S7;F8WE65;P62937-2;E5RIZ5;A0A075B767;A0A0B4J2A2;F5H284;P0DN26;P0DN37	29	21	165.977	0.00647596	0.00378853	1.09957	0.966742	CM55	PM54	18240.6	Peptidyl-prolyl cis-trans isomerase A OS=Homo sapiens OX=9606 GN=PPIA PE=1 SV=2	27944	28814.6	29210.2	25573.7	26693.3	25917.3
Q9P2P6	9	1	42.4606	0.00657242	0.00383921	89.2846	0.965651	CM55	PM54	522161	StAR-related lipid transfer protein 9 OS=Homo sapiens OX=9606 GN=STARD9 PE=1 SV=3	640.681	632.049	454.36	15.6662	0	3.67745
Q9UPU9;Q9UPU9-3	2	1	7.4416	0.00664587	0.00387632	55.9429	0.964814	PM54	CM55	80099.1	Protein Smaug homolog 1 OS=Homo sapiens OX=9606 GN=SAMD4A PE=1 SV=3	7.38621	0	0	116.594	176.595	120.017
Q96MR6;A0A087WVY5;Q96MR6-2	8	2	37.344	0.00668186	0.00389151	1.19825	0.964402	PM54	CM55	145931	Cilia- and flagella-associated protein 57 OS=Homo sapiens OX=9606 GN=CFAP57 PE=2 SV=3	2997.93	3298.8	2965.89	3630.06	3715.23	3753.62
P11142;E9PKE3;P11142-2;E9PNE6;E9PN89;A8K7Q2;E9PLF4;E9PK54;E9PQK7;E9PQQ4;E9PPY6;E9PI65;E9PN25;E9PS65;E9PM13	42	28	324.243	0.0067046	0.00389894	1.06425	0.964141	CM55	PM54	71126.3	Heat shock cognate 71 kDa protein OS=Homo sapiens OX=9606 GN=HSPA8 PE=1 SV=1	15645.4	15329.1	15169	14514.1	14613.1	14230.8
Q15029;Q15029-2;Q15029-3	5	1	25.912	0.00676139	0.00392301	1.57206	0.963487	CM55	PM54	110405	116 kDa U5 small nuclear ribonucleoprotein component OS=Homo sapiens OX=9606 GN=EFTUD2 PE=1 SV=1	295.213	358.593	301.02	220.342	178.768	208.264
P78367	3	1	14.1717	0.00676759	0.00392301	2.33926	0.963415	CM55	PM54	35213.1	Homeobox protein Nkx-3.2 OS=Homo sapiens OX=9606 GN=NKX3-2 PE=2 SV=2	145.121	104.738	126.151	47.1814	69.0928	44.4646
REVERSE31155	4	1	17.934	0.0067761	0.00392301	3.98102	0.963317	CM55	PM54	86972.1	Reversed Sequence 31155	1009.26	752.901	830.154	305.836	123.096	222.238
P39019;M0QXK4;M0QYF7;M0R140;M0R2L9;A0A075B6E2	11	7	79.2643	0.00678907	0.0039247	1.07837	0.963167	CM55	PM54	16060.5	40S ribosomal protein S19 OS=Homo sapiens OX=9606 GN=RPS19 PE=1 SV=2	1653.86	1725.21	1711.79	1593.15	1571.57	1556.15
REVERSE13304	5	2	20.1911	0.0068085	0.00392762	2.53828	0.962942	CM55	PM54	161130	Reversed Sequence 13304	541.556	501.482	410.589	182.897	249.397	140.388
Q9NYQ8;H0YBK2	20	1	78.0955	0.00681422	0.00392762	30.8894	0.962876	CM55	PM54	482397	Protocadherin Fat 2 OS=Homo sapiens OX=9606 GN=FAT2 PE=1 SV=2	65.3648	133.9	153.481	1.86119	8.9975	0.560936
A0A2R8YGI3;E7ES50;E7EX21;Q5TAT6;Q5TAT6-10;Q5TAT6-11;Q5TAT6-2;Q5TAT6-3;Q5TAT6-4;Q5TAT6-5;Q5TAT6-6;Q5TAT6-7;Q5TAT6-8;Q5TAT6-9	3	1	13.8262	0.00689313	0.00396725	Infinity	0.961958	CM55	PM54	71256.1	Collagen alpha-1(XIII) chain OS=Homo sapiens OX=9606 GN=COL13A1 PE=1 SV=1	233.342	98.9025	9.9885	0	0	0
Q93045;E5RGX5;Q93045-2	5	1	34.4147	0.0069035	0.00396738	1.46835	0.961836	PM54	CM55	20942.2	Stathmin-2 OS=Homo sapiens OX=9606 GN=STMN2 PE=1 SV=3	324.595	409.158	342.899	547.717	536.365	496.82
Q14CN4;Q14CN4-2;Q14CN4-3;F8W1S1;H0YIN9;Q7RTS7	9	2	40.1997	0.00693705	0.0039808	3.67786	0.961444	PM54	CM55	56504.7	Keratin_ type II cytoskeletal 72 OS=Homo sapiens OX=9606 GN=KRT72 PE=1 SV=2	90.0221	167.593	219.612	537.522	606.866	610.782
Q9NZ71;D6RA96;F6WH68;Q9NZ71-2;Q9NZ71-4;Q9NZ71-6;Q9NZ71-7;Q9NZ71-8	5	1	28.9679	0.00696007	0.00398816	129.762	0.961174	CM55	PM54	135052	Regulator of telomere elongation helicase 1 OS=Homo sapiens OX=9606 GN=RTEL1 PE=1 SV=2	792.644	853.245	819.134	0	18.9965	0
Q13315;E9PIN0;A0A087X0E9;E9PIQ5;E9PRG7;M0QXY8;Q6P7P1	5	1	25.3754	0.00697983	0.00399363	3.76553	0.960942	CM55	PM54	355764	Serine-protein kinase ATM OS=Homo sapiens OX=9606 GN=ATM PE=1 SV=4	769.868	849.01	396.002	153.212	188.042	193.832
REVERSE1457	3	1	13.0304	0.00703578	0.00401975	2.62679	0.960284	CM55	PM54	86588.4	Reversed Sequence 1457	568.268	729.11	937.845	263.184	352.794	234.957
Q03001-9	15	2	68.1792	0.00720498	0.00411041	1.24977	0.958276	PM54	CM55	347998	Isoform 4 of Dystonin OS=Homo sapiens OX=9606 GN=DST	164.2	169.766	155.197	189.689	209.661	211.991
Q13813;A0A0D9SGF6;Q13813-2;A0A0D9SF54;Q13813-3;A0A0D9SFF6;A0A1B0GUH3	44	10	266.154	0.00729668	0.00415666	1.15538	0.957178	PM54	CM55	285338	Spectrin alpha chain_ non-erythrocytic 1 OS=Homo sapiens OX=9606 GN=SPTAN1 PE=1 SV=3	970.563	931.993	991.226	1077.79	1103.62	1162.01
P55209;F5H4R6;F8VY35;H0YIV4;P55209-2;F8VUX1;F8VV59;F8VXI6;F8W020;F8W0J6;F8W118;B7Z9C2;F8VRJ2;F8W543;H0YH88;H0YHC3;P55209-3;F8VVB5	8	6	59.0496	0.00732096	0.00416442	1.15948	0.956886	CM55	PM54	45659.3	Nucleosome assembly protein 1-like 1 OS=Homo sapiens OX=9606 GN=NAP1L1 PE=1 SV=1	2911.27	2978.72	3101.66	2495.81	2561.24	2697.83
REVERSE36140	3	1	13.1168	0.0073431	0.00417094	3.66772	0.95662	CM55	PM54	83971	Reversed Sequence 36140	282.182	260.218	347.892	69.52	122.25	50.9677
Q86SE9	2	1	8.7618	0.00737481	0.00418287	1.53974	0.956237	CM55	PM54	30512.3	Polycomb group RING finger protein 5 OS=Homo sapiens OX=9606 GN=PCGF5 PE=1 SV=1	494.41	523.6	525.098	389.713	291.945	320.532
P21291;E9PND2;E9PP21;E9PS42	11	11	93.2467	0.00741905	0.00420187	1.17516	0.955703	PM54	CM55	21422.8	Cysteine and glycine-rich protein 1 OS=Homo sapiens OX=9606 GN=CSRP1 PE=1 SV=3	6177.74	6144.22	6447.05	7589.5	6944.46	7522.55
REVERSE6035	1	1	4.1318	0.00749624	0.00423492	38.4529	0.954767	CM55	PM54	54584.2	Reversed Sequence 6035	181.438	263.848	61.6009	5.69595	6.72515	0.76092
P54652	24	9	153.405	0.00750133	0.00423492	1.31616	0.954705	PM54	CM55	70306.2	Heat shock-related 70 kDa protein 2 OS=Homo sapiens OX=9606 GN=HSPA2 PE=1 SV=1	982.31	999.338	1033.3	1459.66	1225.15	1283.34
P09496-2;P09496;P09496-3;P09496-4;P09496-5;C9J8P9;F8WF69	4	2	25.4216	0.00751532	0.00423492	1.47082	0.954535	CM55	PM54	23719	Isoform Non-brain of Clathrin light chain A OS=Homo sapiens OX=9606 GN=CLTA	3909.05	3278.47	3388.07	2237.54	2666.7	2286.01
P52272;A0A087X0X3;P52272-2;M0QZM1;M0R2I7;M0R019;M0QY96;M0R2T0;M0QYL3;M0QYQ7;M0R0N3;M0R0Y6	14	4	91.808	0.00752381	0.00423492	1.21143	0.954431	CM55	PM54	77801.1	Heterogeneous nuclear ribonucleoprotein M OS=Homo sapiens OX=9606 GN=HNRNPM PE=1 SV=3	1019.71	1006.41	909.743	800.625	794.84	827.997
Q15700;B5MCC5;B7Z264;B7Z2T4;E9PIW2;E9PN83;H7C325;Q15700-2;Q15700-3;Q15700-4;Q15700-5	2	1	13.7286	0.0075316	0.00423492	1.25814	0.954336	CM55	PM54	98008.6	Disks large homolog 2 OS=Homo sapiens OX=9606 GN=DLG2 PE=1 SV=3	1382.82	1302.91	1189.01	1033.47	1044.33	1001.94
O75083;O75083-3;D6RD66	17	14	124.499	0.00757446	0.0042529	1.22438	0.953814	CM55	PM54	66877.9	WD repeat-containing protein 1 OS=Homo sapiens OX=9606 GN=WDR1 PE=1 SV=4	5070.18	5187.68	5366.55	4334.06	3951.27	4475.72
O94925;O94925-3;H7BZD1;O94925-2	6	6	41.0892	0.00759226	0.00425327	1.21718	0.953596	PM54	CM55	74316.7	Glutaminase kidney isoform_ mitochondrial OS=Homo sapiens OX=9606 GN=GLS PE=1 SV=1	1151.68	1121.62	1248.14	1454.39	1364.02	1467.83
O75691	5	1	17.2639	0.0075978	0.00425327	1.17241	0.953529	CM55	PM54	321009	Small subunit processome component 20 homolog OS=Homo sapiens OX=9606 GN=UTP20 PE=1 SV=3	2366.98	2383.6	2248.16	2050.33	1887.64	2031.57
C9JZR2;O60716;O60716-10;O60716-11;O60716-12;O60716-13;O60716-14;O60716-15;O60716-16;O60716-17;O60716-18;O60716-19;O60716-2;O60716-20;O60716-21;O60716-22;O60716-23;O60716-24;O60716-25;O60716-26;O60716-27;O60716-28;O60716-29;O60716-3;O60716-30;O60716-31;O60716-32;O60716-4;O60716-5;O60716-6;O60716-7;O60716-8;O60716-9	5	1	24.2481	0.00760776	0.00425327	2.63228	0.953407	CM55	PM54	105419	Catenin delta-1 OS=Homo sapiens OX=9606 GN=CTNND1 PE=1 SV=2	368.092	427.617	321.359	167.727	161.126	95.5205
Q53FD0;H0YE08;J3KMY6;Q53FD0-2	4	1	18.7011	0.00767341	0.00428292	1.86821	0.952602	PM54	CM55	51942.8	Zinc finger C2HC domain-containing protein 1C OS=Homo sapiens OX=9606 GN=ZC2HC1C PE=1 SV=3	102.496	77.7313	79.8053	156.096	189.965	139.734
P21796;C9JI87	15	7	98.8047	0.00768272	0.00428292	1.28736	0.952488	CM55	PM54	30886.7	Voltage-dependent anion-selective channel protein 1 OS=Homo sapiens OX=9606 GN=VDAC1 PE=1 SV=2	2326.94	2299.19	2042.27	1778.07	1773.59	1628.26
P62826;B5MDF5;J3KQE5;F5H018;B4DV51;H0YFC6	9	6	43.0964	0.00773144	0.004302	1.22434	0.951889	CM55	PM54	24594.2	GTP-binding nuclear protein Ran OS=Homo sapiens OX=9606 GN=RAN PE=1 SV=3	4081.37	3831.56	3615.14	3213.17	3010.58	3191.99
O43747;O43747-2;B4DGE1;H3BN71;H3BNR4;H3BR36;H3BRM7;H3BUN9	4	1	18.8355	0.00773896	0.004302	1.44647	0.951796	PM54	CM55	92207.1	AP-1 complex subunit gamma-1 OS=Homo sapiens OX=9606 GN=AP1G1 PE=1 SV=5	1042.59	928.86	940.04	1580.9	1273.19	1357.3
P30419;P30419-2;B7Z8J4;O60551;Q5VUC6	3	1	14.2392	0.00777513	0.0043109	1.44401	0.951351	PM54	CM55	57148.5	Glycylpeptide N-tetradecanoyltransferase 1 OS=Homo sapiens OX=9606 GN=NMT1 PE=1 SV=2	488.394	441.62	461.38	738.602	683.617	586.966
Q9Y2A7;Q9Y2A7-2	10	1	41.0897	0.00777704	0.0043109	2.50984	0.951327	PM54	CM55	130102	Nck-associated protein 1 OS=Homo sapiens OX=9606 GN=NCKAP1 PE=1 SV=1	133.43	188.212	105.92	313.894	335.828	423.393
H3BNC9;P08708;A0A075B716;H0YN88;H0YN73	4	2	28.5566	0.00779908	0.004317	1.36872	0.951055	PM54	CM55	65102.9	Uncharacterized protein OS=Homo sapiens OX=9606 PE=3 SV=2	1786.33	1891.38	2167.73	2646.86	2546.69	2807.19
REVERSE27513	2	1	10.4177	0.00788403	0.00435785	2.93872	0.950003	CM55	PM54	38008.3	Reversed Sequence 27513	327.344	528.596	587.51	200.757	133.598	156.828
P22392;O60361;F6XY72	13	4	75.8839	0.00795112	0.00438872	1.31485	0.94917	PM54	CM55	17412.1	Nucleoside diphosphate kinase B OS=Homo sapiens OX=9606 GN=NME2 PE=1 SV=1	794.607	689.11	662.221	957.606	940.171	923.802
P07355;P07355-2;H0YN42;H0YMD0;H0YMU9;H0YM50;H0YKS4;H0YNP5;H0YL33;H0YMM1;H0YN28;H0YKX9;H0YKZ7;H0YLV6;H0YMT9;H0YKL9;H0YMW4;H0YKV8;H0YNA0;H0YMD9	58	32	383.536	0.00801004	0.00441501	1.09764	0.948435	PM54	CM55	38832.2	Annexin A2 OS=Homo sapiens OX=9606 GN=ANXA2 PE=1 SV=2	66234.2	63139.9	63231	69621.5	71983.9	69805.2
A0A1W2PRS1;A0A1W2PS43;Q14108;A0A1W2PPX5;A0A1W2PQB7;A0A1W2PQR6;A0A1W2PPU6;A0A1W2PRF6;Q14108-2;A0A1W2PNX7;A0A1W2PS70;A0A1W2PSE4;D6RDG0	7	1	48.2496	0.00812506	0.00447209	2.15117	0.946997	CM55	PM54	58561.6	Lysosome membrane protein 2 (Fragment) OS=Homo sapiens OX=9606 GN=SCARB2 PE=1 SV=1	424.88	467.872	335.685	234.699	153.366	182.99
P15924;P15924-2;P15924-3	14	2	63.2046	0.00820327	0.00450879	1.47236	0.946014	CM55	PM54	334227	Desmoplakin OS=Homo sapiens OX=9606 GN=DSP PE=1 SV=3	3343.26	3011.31	2968.24	2009.18	2412.21	1910.49
Q8TER5;Q8TER5-3;Q8TER5-4;Q8TER5-2	3	1	11.8602	0.00827532	0.00454201	1.72889	0.945107	PM54	CM55	166369	Rho guanine nucleotide exchange factor 40 OS=Homo sapiens OX=9606 GN=ARHGEF40 PE=1 SV=3	203.108	202.275	227.652	394.717	406.188	293.542
P35658;A0A0A0MSW3;P35658-2;P35658-3;P35658-4	4	1	16.8754	0.00832768	0.00456433	1.86797	0.944446	PM54	CM55	214361	Nuclear pore complex protein Nup214 OS=Homo sapiens OX=9606 GN=NUP214 PE=1 SV=2	445.946	408.395	556.358	1026.78	856.207	752.154
H9KV82	5	1	20.7569	0.0083734	0.004581	11.1399	0.943867	CM55	PM54	70070.6	EF-hand domain-containing family member B OS=Homo sapiens OX=9606 GN=EFHB PE=1 SV=1	91.9851	102.422	117.111	2.75012	6.15902	19.055
H3BUU9;P55287;P55287-2	1	1	3.9825	0.00838153	0.004581	55.3974	0.943764	PM54	CM55	74078.5	Cadherin-11 OS=Homo sapiens OX=9606 GN=CDH11 PE=1 SV=1	8.45783	0	8.04276	291.731	336.862	285.496
A0A0B4J2B4;K7EJ78;K7ELC2;K7EM56;K7EQJ5;P62841;S4R417;S4R456	2	1	14.4494	0.00839584	0.00458241	1.35455	0.943583	PM54	CM55	13742.3	40S ribosomal protein S15 OS=Homo sapiens OX=9606 GN=RPS15 PE=1 SV=1	3967.59	3610.45	4284.09	4965.45	5441.36	5660.99
REVERSE40497	4	2	22.5582	0.00859812	0.00467583	1.58844	0.941011	PM54	CM55	58655.6	Reversed Sequence 40497	255.231	296.121	319.517	402.032	471.339	509.952
P30154;P30154-2;P30154-3;P30154-4;P30154-5;H0YDG7	7	1	39.112	0.00859896	0.00467583	1.23893	0.941	CM55	PM54	66840.9	Serine/threonine-protein phosphatase 2A 65 kDa regulatory subunit A beta isoform OS=Homo sapiens OX=9606 GN=PPP2R1B PE=1 SV=3	5170.11	5610.85	5179.32	4470.93	4415.99	3995.39
P62191;P62191-2	6	1	32.3404	0.00860289	0.00467583	3.40474	0.94095	PM54	CM55	49355.7	26S proteasome regulatory subunit 4 OS=Homo sapiens OX=9606 GN=PSMC1 PE=1 SV=1	107.106	211.725	238.114	533.836	729.818	632.599
A0A087WZC3;Q15431;Q5VXJ5	3	1	11.055	0.00867229	0.00470296	1.60214	0.940063	PM54	CM55	111868	Synaptonemal complex protein 1 OS=Homo sapiens OX=9606 GN=SYCP1 PE=1 SV=1	623.456	838.348	833.493	1200.48	1197.87	1279.04
Q9H853	4	1	18.6281	0.00867688	0.00470296	2.99344	0.940005	PM54	CM55	27836.4	Putative tubulin-like protein alpha-4B OS=Homo sapiens OX=9606 GN=TUBA4B PE=5 SV=2	478.908	282.313	240.971	1109.15	1099.61	791.244
H0YJ97;Q15643	17	1	79.7453	0.00869318	0.00470527	79.3693	0.939796	PM54	CM55	196272	Thyroid receptor-interacting protein 11 (Fragment) OS=Homo sapiens OX=9606 GN=TRIP11 PE=1 SV=1	0	0	16.6228	394.502	435.894	488.945
M0R0Y3;Q9Y230;Q9Y230-2	2	1	9.9381	0.00872228	0.00471103	1.99399	0.939424	PM54	CM55	38869.7	RuvB-like helicase OS=Homo sapiens OX=9606 GN=RUVBL2 PE=1 SV=1	211.545	135.021	162.971	295.841	371.22	348.948
H3BVG0;Q8N1F7;Q8N1F7-2;H3BPA9	4	1	20.5327	0.00872875	0.00471103	86.044	0.939341	PM54	CM55	100353	Nuclear pore complex protein Nup93 OS=Homo sapiens OX=9606 GN=NUP93 PE=1 SV=1	0	15.7354	8.89855	727.66	583.321	808.622
Q96M86;E9PM64	10	2	45.2351	0.00874	0.00471103	2.66143	0.939197	PM54	CM55	539804	Dynein heavy chain domain-containing protein 1 OS=Homo sapiens OX=9606 GN=DNHD1 PE=2 SV=2	52.9311	44.9374	89.0484	148.8	178.229	170.437
A0A0C4DGA6;Q14527	1	1	3.6947	0.00877491	0.00472334	1.18492	0.938749	CM55	PM54	114884	Helicase-like transcription factor OS=Homo sapiens OX=9606 GN=HLTF PE=1 SV=1	2208.64	2230.78	2288.65	1951.7	1765.96	1960.42
F5GWQ8;J3QKW8;Q15846;R4GN76	4	1	19.5755	0.00883322	0.00474186	1.68603	0.938	CM55	PM54	61161.1	Clusterin OS=Homo sapiens OX=9606 GN=CLUL1 PE=1 SV=1	497.642	630.346	697.116	346.873	345.015	390.596
Q9H8Y8;Q9H8Y8-2;Q9H8Y8-3	4	2	20.8357	0.00883359	0.00474186	1.46369	0.937996	CM55	PM54	47316.5	Golgi reassembly-stacking protein 2 OS=Homo sapiens OX=9606 GN=GORASP2 PE=1 SV=3	625.64	748.354	776.523	527.442	454.652	487.147
REVERSE41772	6	1	21.2624	0.00889686	0.00476927	7.33382	0.937182	CM55	PM54	336383	Reversed Sequence 41772	177.945	173.493	61.6962	14.088	15.1345	27.1102
B4DR61;P61619;P61619-3	2	2	10.4962	0.00893205	0.00477659	1.42613	0.936729	CM55	PM54	53405.9	cDNA FLJ59739_ highly similar to Protein transport protein Sec61 subunit alpha isoform 1 OS=Homo sapiens OX=9606 GN=SEC61A1 PE=1 SV=1	618.504	696.745	668.307	443.859	421.352	525.654
Q9Y6G9;B4E2E0;C9JGM7;C9JLW1;E9PHI6;O43237	2	1	10.4529	0.00893496	0.00477659	2.81706	0.936691	PM54	CM55	56864.4	Cytoplasmic dynein 1 light intermediate chain 1 OS=Homo sapiens OX=9606 GN=DYNC1LI1 PE=1 SV=3	81.9431	129.56	174.667	332.163	354.506	401.195
H0Y390	38	1	185.597	0.00897921	0.00479369	5.07972	0.936121	PM54	CM55	508325	Microtubule-actin cross-linking factor 1_ isoforms 1/2/3/5 (Fragment) OS=Homo sapiens OX=9606 GN=MACF1 PE=1 SV=1	36.6106	14.6497	10.8101	93.0819	108.693	113.525
Q5VV41;B0QZD3;Q5VV41-2	2	1	8.1646	0.00903681	0.00481786	1.83379	0.935377	CM55	PM54	80390.3	Rho guanine nucleotide exchange factor 16 OS=Homo sapiens OX=9606 GN=ARHGEF16 PE=1 SV=1	606.139	635.747	670.432	309.811	292.449	440.562
P04844;P04844-2;Q5JYR4;Q5JYR7;F2Z3K5;H0Y5M1;Q5JYR3	10	6	62.9343	0.00954208	0.00508031	1.20796	0.928815	CM55	PM54	69398.1	Dolichyl-diphosphooligosaccharide--protein glycosyltransferase subunit 2 OS=Homo sapiens OX=9606 GN=RPN2 PE=1 SV=3	1570.38	1565.43	1715.28	1322.55	1408.64	1284.75
Q13576;E7EWC2;F5H7S7;Q13576-2;Q13576-3;E9PDT6	11	1	50.2478	0.00956325	0.00508465	1.37	0.928539	CM55	PM54	181148	Ras GTPase-activating-like protein IQGAP2 OS=Homo sapiens OX=9606 GN=IQGAP2 PE=1 SV=4	259.279	285.006	268.668	222.375	190.32	180.701
Q12788;J3KNP2;A0A087WYP7	3	1	14.637	0.00959705	0.00509129	3.44112	0.928097	CM55	PM54	90403.4	Transducin beta-like protein 3 OS=Homo sapiens OX=9606 GN=TBL3 PE=1 SV=2	186.039	116.495	175.612	53.4032	57.4681	28.0795
P00492	3	1	14.7152	0.0096018	0.00509129	4.24717	0.928035	CM55	PM54	24807.5	Hypoxanthine-guanine phosphoribosyltransferase OS=Homo sapiens OX=9606 GN=HPRT1 PE=1 SV=2	174.936	188.435	244.406	28.0507	35.6325	79.4187
REVERSE21911	6	1	20.3189	0.00973294	0.00515384	4.71863	0.92632	CM55	PM54	268493	Reversed Sequence 21911	843.871	516.123	455.744	121.058	192.597	71.1469
E7EQL5;Q13409;Q13409-2;Q13409-3;Q13409-5;Q13409-6;Q13409-7;E7EMU4;E7EQU2;E7ESD3;E7ET01;E7ETL8;E7EV09;E7ERH4;E7ERR6;E7EUM4;E9PGG1;E7EU01	4	1	27.1576	0.00979017	0.00517713	60.5652	0.925571	PM54	CM55	35028	Cytoplasmic dynein 1 intermediate chain 2 (Fragment) OS=Homo sapiens OX=9606 GN=DYNC1I2 PE=1 SV=1	15.2728	0	0	291.138	309.683	324.182
Q8NCX0;B8ZZI4;Q8NCX0-2	3	1	17.2062	0.00986793	0.0052112	3.27282	0.924551	PM54	CM55	129616	Coiled-coil domain-containing protein 150 OS=Homo sapiens OX=9606 GN=CCDC150 PE=1 SV=2	155.315	78.9531	66.7508	280.274	336.517	368.392
P42356;C9JLI1;P42356-2	6	1	25.3703	0.00998434	0.00526556	2.51268	0.923023	CM55	PM54	239397	Phosphatidylinositol 4-kinase alpha OS=Homo sapiens OX=9606 GN=PI4KA PE=1 SV=4	184.289	206.916	307.573	106.884	71.7344	99.4822
E5RJ29;Q9NYI0;Q9NYI0-2;Q9NYI0-3;E5RJE4;H0YC20;A0A087WXD8;A0A087X1Z0;B4DKF8	6	1	28.0166	0.0100795	0.00530841	2.76682	0.921773	CM55	PM54	109675	PH and SEC7 domain-containing protein 3 OS=Homo sapiens OX=9606 GN=PSD3 PE=1 SV=1	569.181	719.796	730.753	292.915	151.864	285.202
P33176	20	5	110.771	0.0100928	0.00530841	1.53696	0.921599	PM54	CM55	110426	Kinesin-1 heavy chain OS=Homo sapiens OX=9606 GN=KIF5B PE=1 SV=1	397.529	447.704	545.863	680.561	722.928	734.574
P61158;B4DXW1;F8WDR7;Q9P1U1-2;A0A0A0MTI9;C9IZN3;F8WE84;F8WEW2;H7C4J1;Q9C0K3	20	13	119.807	0.0101867	0.00535063	1.24594	0.920362	CM55	PM54	47827.5	Actin-related protein 3 OS=Homo sapiens OX=9606 GN=ACTR3 PE=1 SV=3	8105.09	7114.01	8085.17	5996.45	6276.61	6431.17
P21589;P21589-2;Q96B60;H0Y7R7;H0Y3X5	12	7	80.7314	0.0102093	0.00535531	1.06063	0.920065	PM54	CM55	63938.1	5'-nucleotidase OS=Homo sapiens OX=9606 GN=NT5E PE=1 SV=1	3153.01	3089.57	3219.97	3375.16	3342.12	3319.03
C9JA28;Q9UNL2;Q9UNL2-2	1	1	6.8501	0.0102371	0.00535856	1.37577	0.9197	CM55	PM54	20218.4	Translocon-associated protein subunit gamma OS=Homo sapiens OX=9606 GN=SSR3 PE=1 SV=1	2922.72	3075.78	3233.56	2264.76	1978.95	2466.77
P17655;P17655-2	10	8	63.509	0.0102489	0.00535856	1.11049	0.919545	CM55	PM54	80850.9	Calpain-2 catalytic subunit OS=Homo sapiens OX=9606 GN=CAPN2 PE=1 SV=6	2214.82	2260.86	2161.7	1927.3	2058.14	1991.54
P25786;P25786-2;B4DEV8;F5GX11	4	1	23.9466	0.0102567	0.00535856	1.23498	0.919442	CM55	PM54	29840.8	Proteasome subunit alpha type-1 OS=Homo sapiens OX=9606 GN=PSMA1 PE=1 SV=1	1202.66	1166.16	1053.46	921.343	888.789	960.982
B7Z7P8;P62495;P62495-2;D6RCB3;D6RJE8;I3L492	4	1	20.6681	0.010301	0.00537455	46.5893	0.918857	PM54	CM55	47761.3	Eukaryotic peptide chain release factor subunit 1 OS=Homo sapiens OX=9606 GN=ETF1 PE=1 SV=1	0	5.75247	0	35.8758	76.8224	155.305
P04264	12	4	75.0171	0.0104018	0.00541989	1.2281	0.917529	CM55	PM54	66209.9	Keratin_ type II cytoskeletal 1 OS=Homo sapiens OX=9606 GN=KRT1 PE=1 SV=6	1112.08	988.181	1007.07	859.441	800.336	870.418
P29279;P29279-2	4	1	19.0873	0.0105158	0.005472	1.97243	0.916026	CM55	PM54	40315.6	Connective tissue growth factor OS=Homo sapiens OX=9606 GN=CTGF PE=1 SV=2	625.461	521.555	693.42	381.242	306.15	245.687
Q9H2D6;Q9H2D6-2;Q9H2D6-3;Q9H2D6-5;Q9H2D6-7;Q9H2D6-6;F6WYE2;F6TR96	19	2	79.8517	0.0107495	0.00558616	1.32314	0.912941	PM54	CM55	264284	TRIO and F-actin-binding protein OS=Homo sapiens OX=9606 GN=TRIOBP PE=1 SV=3	316.565	284.499	325.33	433.628	372.136	419.988
P46734;P46734-3;P46734-2;J3KRV4;J3QR49;E9PMA8;J3QL77;X6RB39	9	2	46.2776	0.0108634	0.00563787	1.94482	0.911436	CM55	PM54	39660.7	Dual specificity mitogen-activated protein kinase kinase 3 OS=Homo sapiens OX=9606 GN=MAP2K3 PE=1 SV=2	229.266	276.281	264.498	168.896	104.62	122.431
P08922;Q5H8Y1	2	1	7.3824	0.0108971	0.00564785	23.5816	0.910991	PM54	CM55	266710	Proto-oncogene tyrosine-protein kinase ROS OS=Homo sapiens OX=9606 GN=ROS1 PE=1 SV=3	1.05884	9.62631	17.7743	193.216	250.671	227.233
REVERSE12257	4	1	20.7424	0.011087	0.00573866	5.24226	0.908482	PM54	CM55	343311	Reversed Sequence 12257	83.0165	20.9585	47.7172	256.03	246.42	292.758
Q9BV73;Q9BV73-2;E7ETF9;H7C0P0	9	2	38.9585	0.0111112	0.00574358	1.91197	0.908162	CM55	PM54	282050	Centrosome-associated protein CEP250 OS=Homo sapiens OX=9606 GN=CEP250 PE=1 SV=2	792.195	1137.74	845.964	576.146	433.964	441.74
Q16891;B9A067;Q16891-2;Q16891-3;Q16891-4;C9J406;H7C463;A0A087WYS0;D6RAW4	10	2	53.6232	0.0111566	0.00575944	1.31365	0.907561	CM55	PM54	84077.2	MICOS complex subunit MIC60 OS=Homo sapiens OX=9606 GN=IMMT PE=1 SV=1	709.1	777.01	710.632	538.774	516.366	617.099
Q8NF91-2;Q8NF91-8;Q8NF91-11;H0Y325;H0Y326;Q5JV20	15	1	78.933	0.0112606	0.00580545	1.14145	0.906187	CM55	PM54	383041	Isoform 2 of Nesprin-1 OS=Homo sapiens OX=9606 GN=SYNE1	3646.39	3440.93	3720.67	3046.21	3183.9	3238.5
P25398	7	5	38.1665	0.0113114	0.00582393	1.20134	0.905516	CM55	PM54	14914.2	40S ribosomal protein S12 OS=Homo sapiens OX=9606 GN=RPS12 PE=1 SV=3	1081.05	980.252	1092.61	837.751	884.682	902.892
Q5VSL9;Q5VSL9-2;Q5VSL9-3	4	1	15.9857	0.0113706	0.00584672	7.542	0.904734	CM55	PM54	96317.4	Striatin-interacting protein 1 OS=Homo sapiens OX=9606 GN=STRIP1 PE=1 SV=1	299.234	99.9713	329.212	38.3601	37.9496	20.2718
J3KP97;Q5T9S5;E9PFB9;Q5T9S5-2	5	2	21.8417	0.0114085	0.00585851	1.35803	0.904233	PM54	CM55	176038	Coiled-coil domain-containing protein 18 (Fragment) OS=Homo sapiens OX=9606 GN=CCDC18 PE=1 SV=1	241	225.063	243.584	283.683	327.811	352.23
C9J0Q5;C9JE98;C9JFD3;Q9Y618;Q9Y618-4;Q9Y618-5;C9J330;C9JQE8;C9J7T7;H0YGK8;Q9Y618-2;H7C0P3;H7C1J7	6	1	25.4686	0.0114296	0.00586164	2.86861	0.903954	PM54	CM55	273508	Nuclear receptor corepressor 2 OS=Homo sapiens OX=9606 GN=NCOR2 PE=1 SV=2	182.206	85.008	85.4887	342.783	335.064	333.918
A0A2R8YGH5;H7C1E4;P61966;P61966-2	2	1	10.5208	0.0114751	0.00587727	1.18045	0.903352	CM55	PM54	18829.9	AP complex subunit sigma OS=Homo sapiens OX=9606 GN=AP1S1 PE=1 SV=1	4402.15	4663.92	4288.65	3955.08	3587.08	3771.08
REVERSE35994	17	1	79.2351	0.0116165	0.00594187	1.95004	0.901485	CM55	PM54	295101	Reversed Sequence 35994	345.946	375.366	422.323	151.658	185.514	249.295
A0A0B4J2C3;P13693;Q5W0H4;J3KPG2;E9PJF7;P13693-2;H0YCX0;Q56UQ5	4	1	26.1452	0.0117141	0.00598399	1.1766	0.900195	PM54	CM55	22802	Translationally-controlled tumor protein OS=Homo sapiens OX=9606 GN=TPT1 PE=1 SV=1	1806.79	1855.52	1877.51	2183.32	2036.93	2297.93
Q9NZM1;Q9NZM1-6;Q9NZM1-2;Q9NZM1-3;Q9NZM1-5;H0YD14;Q9NZM1-7;Q9NZM1-8;Q9NZM1-4	53	27	332.45	0.0117557	0.00599039	1.04715	0.899647	CM55	PM54	236249	Myoferlin OS=Homo sapiens OX=9606 GN=MYOF PE=1 SV=1	3025.67	2994.29	3074.15	2853.8	2911.28	2919.57
Q16270;Q16270-2	4	2	23.5795	0.0117622	0.00599039	1.10273	0.899561	CM55	PM54	30156.8	Insulin-like growth factor-binding protein 7 OS=Homo sapiens OX=9606 GN=IGFBP7 PE=1 SV=1	1823.26	1770.6	1714.74	1640.37	1566.02	1607.65
Q13200;Q13200-3;Q13200-2;H7C2Q3;C9JPC0	9	3	48.1098	0.0117726	0.00599039	2.58478	0.899423	PM54	CM55	100941	26S proteasome non-ATPase regulatory subunit 2 OS=Homo sapiens OX=9606 GN=PSMD2 PE=1 SV=3	51.9195	33.7994	58.3495	148.444	131.274	92.6676
P46821;D6RA32;D6RA40;D6RCL2;D6RGJ3	38	17	235.521	0.0118155	0.00600441	1.14535	0.898857	CM55	PM54	271832	Microtubule-associated protein 1B OS=Homo sapiens OX=9606 GN=MAP1B PE=1 SV=2	3427.59	3387.57	3263.19	2889.33	2820.26	3089.76
Q4LE39;Q4LE39-2;Q4LE39-3	3	1	12.6799	0.0118623	0.00602032	1.82127	0.89824	CM55	PM54	148893	AT-rich interactive domain-containing protein 4B OS=Homo sapiens OX=9606 GN=ARID4B PE=1 SV=2	989.849	955.604	676.638	536.75	453.427	449.524
P61163;R4GMT0;A0A1B0GVS3;P42025	8	4	50.6401	0.0120465	0.00610589	1.21995	0.895811	CM55	PM54	42727.9	Alpha-centractin OS=Homo sapiens OX=9606 GN=ACTR1A PE=1 SV=1	1625.58	1596.28	1794.89	1438.84	1363.29	1310.13
Q14789;Q14789-2;Q14789-3;Q14789-4;E7EU81;H0Y867	17	1	83.6047	0.0120644	0.00610706	1.98293	0.895574	PM54	CM55	377445	Golgin subfamily B member 1 OS=Homo sapiens OX=9606 GN=GOLGB1 PE=1 SV=2	124.631	190.406	112.368	269.162	289.809	288.544
P35080;C9JQ45;G5E9Q6;P35080-2;C9J0J7;C9J712;C9J2N0	4	1	19.0147	0.0122579	0.00619699	1.21666	0.893025	PM54	CM55	15388.4	Profilin-2 OS=Homo sapiens OX=9606 GN=PFN2 PE=1 SV=3	3040.62	3038.04	2787.79	3521.99	3423.39	3842.09
REVERSE29224	22	3	115.105	0.0123941	0.00625676	1.05027	0.891234	PM54	CM55	210879	Reversed Sequence 29224	3979.94	4055.9	4017.86	4211.43	4151.87	4296.36
J3KT51;Q9UK76;Q9UK76-2;J3KSH8;Q9UK76-3	3	1	16.5596	0.0124082	0.00625676	28.8018	0.891049	PM54	CM55	11012	Jupiter microtubule-associated homolog 1 OS=Homo sapiens OX=9606 GN=JPT1 PE=1 SV=1	8.55089	0	4.95933	161.991	97.9009	129.227
Q9H799;Q9H799-5;H0Y9I8;H0YA77	19	3	91.2901	0.0124886	0.00628917	1.16243	0.889992	CM55	PM54	365510	Ciliogenesis and planar polarity effector 1 OS=Homo sapiens OX=9606 GN=CPLANE1 PE=1 SV=4	1097.76	1210.12	1103.69	963.682	964.826	1006.37
REVERSE17731	12	1	50.4896	0.0125158	0.00628954	1.3477	0.889634	CM55	PM54	228271	Reversed Sequence 17731	819.496	1010.82	958.317	657.271	721.279	690.625
REVERSE4859	3	1	16.7621	0.0125215	0.00628954	1.67031	0.88956	CM55	PM54	167139	Reversed Sequence 4859	460.619	379.048	387.027	202.5	289.815	242.096
Q9UPX8-3;A6NHU9;E7EUA2;Q9UPX8;Q9UPX8-4;A0A0A0MSQ6;H7C1X5;H0Y7S5;Q9UPX8-2;B7ZKU9;C9JFP8;E7EX50	5	1	23.2839	0.0127444	0.00639327	1.30881	0.886635	CM55	PM54	202345	Isoform 3 of SH3 and multiple ankyrin repeat domains protein 2 OS=Homo sapiens OX=9606 GN=SHANK2	2716.47	3115.53	3266.6	2449.75	2234.66	2267.38
Q8NHW5	10	1	73.5651	0.0128188	0.00642238	1.14281	0.885659	CM55	PM54	34535.6	60S acidic ribosomal protein P0-like OS=Homo sapiens OX=9606 GN=RPLP0P6 PE=5 SV=1	482.933	507.715	503.331	441.149	413.265	452.872
A1KZ92;A1KZ92-2	3	1	16.1663	0.0130561	0.00652781	4.23706	0.882554	PM54	CM55	166310	Peroxidasin-like protein OS=Homo sapiens OX=9606 GN=PXDNL PE=1 SV=3	77.482	28.2906	87.5354	238.466	284.84	295.751
REVERSE14127	5	1	19.8453	0.0130626	0.00652781	6.51325	0.882469	CM55	PM54	539129	Reversed Sequence 14127	165.009	91.6135	84.1944	26.0961	19.5272	6.70337
Q07021;I3L3B0;I3L3Q7	5	1	31.1903	0.0130839	0.00652928	1.48202	0.882192	CM55	PM54	31761.5	Complement component 1 Q subcomponent-binding protein_ mitochondrial OS=Homo sapiens OX=9606 GN=C1QBP PE=1 SV=1	918.315	949.721	865.744	705.626	517.257	621.744
A6NMY6;H0YN52;H0YKN4;H0YNB8;H0YLE2	66	32	283.666	0.013099	0.00652928	1.12613	0.881995	PM54	CM55	38830.2	Putative annexin A2-like protein OS=Homo sapiens OX=9606 GN=ANXA2P2 PE=5 SV=2	21802.2	21026.4	20170.9	23469	24406.1	23070.7
Q9NX02;A0A0G2JLX3;A0A0G2JMG8;A0A0G2JPQ2;J3KN39;Q9NX02-2;Q9NX02-4;Q9NX02-5;A0A0G2JLQ8;A0A0G2JNC8;A0A0G2JP37;A0A0G2JPB6;Q9NX02-3	4	1	18.6054	0.0131669	0.00655476	42.8744	0.881108	PM54	CM55	122968	NACHT_ LRR and PYD domains-containing protein 2 OS=Homo sapiens OX=9606 GN=NLRP2 PE=1 SV=1	0	15.9507	0	169.372	232.604	281.9
Q8NC51;Q8NC51-2;Q8NC51-3;Q8NC51-4	3	1	16.3277	0.013262	0.00659147	1.51167	0.879867	CM55	PM54	45022.5	Plasminogen activator inhibitor 1 RNA-binding protein OS=Homo sapiens OX=9606 GN=SERBP1 PE=1 SV=2	764.773	680.031	681.343	390.753	484.24	531.494
Q5JRX3;Q5JRX3-2;Q5JRX3-3	1	1	3.879	0.0132744	0.00659147	1.34487	0.879706	CM55	PM54	118439	Presequence protease_ mitochondrial OS=Homo sapiens OX=9606 GN=PITRM1 PE=1 SV=3	1296.38	1311.19	1258.82	1048.55	994.338	832.029
A8MPP1;Q96FC9-2;Q96FC9-3;Q96FC9-4;C9K0E8;F5H235;F6WZM0;Q92771;Q96FC9;B4DMS8;F5GXJ8;Q96FC9-5	4	1	22.1917	0.0133015	0.00659656	1.79527	0.879353	PM54	CM55	103008	Putative ATP-dependent RNA helicase DDX11-like protein 8 OS=Homo sapiens OX=9606 GN=DDX11L8 PE=1 SV=1	95.7476	98.8083	108.375	230.49	153.92	159.434
A0A087WTA1;A0A0A0MR20;E9PDN6;F5H107;Q9C0A0;Q9C0A0-2	13	1	75.5633	0.0133797	0.00662693	3.26092	0.878335	CM55	PM54	141945	Contactin-associated protein-like 4 OS=Homo sapiens OX=9606 GN=CNTNAP4 PE=1 SV=1	216.627	201.508	175.983	54.4392	34.0564	93.6981
REVERSE26637	16	1	71.1474	0.0135126	0.00668429	2.57015	0.876606	PM54	CM55	228195	Reversed Sequence 26637	78.0658	35.9283	65.7294	148.576	156.455	156.886
REVERSE16944	8	1	28.4154	0.0135381	0.00668843	1.72155	0.876275	CM55	PM54	211096	Reversed Sequence 16944	383.967	524.541	456.882	290.516	284.395	218.204
P16050;P16050-2	5	3	22.0854	0.0135679	0.00669471	1.36794	0.875888	PM54	CM55	75545.9	Arachidonate 15-lipoxygenase OS=Homo sapiens OX=9606 GN=ALOX15 PE=1 SV=3	637.536	559.111	724.59	863.742	895.672	868.717
REVERSE24367	4	1	21.6238	0.0139583	0.00686801	2.89232	0.870832	CM55	PM54	139865	Reversed Sequence 24367	236.732	257.828	219.315	62.0975	55.0173	129.702
P35609;P35609-2	21	1	186.178	0.0139639	0.00686801	1.91793	0.87076	CM55	PM54	104424	Alpha-actinin-2 OS=Homo sapiens OX=9606 GN=ACTN2 PE=1 SV=1	266.185	292.354	215.273	162.272	104.081	137.109
Q9H223	7	3	34.2211	0.0139719	0.00686801	1.29924	0.870657	CM55	PM54	61403.4	EH domain-containing protein 4 OS=Homo sapiens OX=9606 GN=EHD4 PE=1 SV=1	364.974	418.858	377.64	273.547	298.264	322.152
P62241;Q5JR95	9	6	52.7613	0.0140045	0.0068754	1.10637	0.870236	CM55	PM54	24490.3	40S ribosomal protein S8 OS=Homo sapiens OX=9606 GN=RPS8 PE=1 SV=2	7301.03	6744.29	6917.99	6242.76	6360.3	6344.7
P58107;A0A075B730	26	7	123.289	0.0140708	0.00689925	1.27159	0.869382	CM55	PM54	558111	Epiplakin OS=Homo sapiens OX=9606 GN=EPPK1 PE=1 SV=3	1098	1229.88	1234.86	871.466	920.349	1009.98
Q8NE71;Q8NE71-2;H0YGW7;Q5STZ8;A0A0G2JIC2	6	1	26.7806	0.0142033	0.00695497	1.18386	0.867675	PM54	CM55	96382.1	ATP-binding cassette sub-family F member 1 OS=Homo sapiens OX=9606 GN=ABCF1 PE=1 SV=2	660.33	719.343	711.961	867.989	826.67	781.55
Q86YA3;G3XAL8;Q86YA3-4;Q86YA3-5;Q86YA3-6;I3L0G6;Q86YA3-3;Q86YA3-7;Q86YA3-2	21	2	108.275	0.01422	0.00695497	29.682	0.86746	CM55	PM54	239054	Protein ZGRF1 OS=Homo sapiens OX=9606 GN=ZGRF1 PE=1 SV=3	129.013	187.611	172.845	9.79597	0	6.69447
P05388;F8VU65;F8VW21;F8VWS0;P05388-2;F8VPE8;G3V210;F8VQY6;F8VRK7;F8VZS0;F8VS58;F8VWV4;F8W1K8	12	3	95.4968	0.0142519	0.00696186	1.14257	0.86705	PM54	CM55	34444.7	60S acidic ribosomal protein P0 OS=Homo sapiens OX=9606 GN=RPLP0 PE=1 SV=1	3414.03	3580.98	3343.72	4006.14	3746.81	4059.82
P20962;F5GXR3;F5H7R9	2	1	6.7335	0.0143017	0.00697746	1.38375	0.86641	PM54	CM55	11529.9	Parathymosin OS=Homo sapiens OX=9606 GN=PTMS PE=1 SV=2	322.716	269.923	266.927	433.933	367.19	388.307
Q15751;H0YNB1	10	3	44.8549	0.0143844	0.00700906	1.5527	0.865349	CM55	PM54	539129	Probable E3 ubiquitin-protein ligase HERC1 OS=Homo sapiens OX=9606 GN=HERC1 PE=1 SV=2	856.491	702.076	847.006	510.666	595.62	443.001
Q9H9B4;D6RDG7;D6RFI0;S4R2X2;D6RAE9;H0Y9J5	6	1	33.2485	0.0144224	0.00701013	1.51258	0.864861	PM54	CM55	35904.6	Sideroflexin-1 OS=Homo sapiens OX=9606 GN=SFXN1 PE=1 SV=4	352.463	336.146	397.209	606.91	576.186	459.294
A0A0C4DG76;Q5JZ08;Q9BQS7;Q9BQS7-2;Q9BQS7-3	1	1	4.0319	0.0144225	0.00701013	2.00566	0.86486	PM54	CM55	131622	Hephaestin_ isoform CRA_c OS=Homo sapiens OX=9606 GN=HEPH PE=1 SV=1	346.286	192.941	244.707	546.52	544.56	481.228
Q04637;E7EUU4;E7EX73;E9PGM1;Q04637-3;Q04637-4;Q04637-5;Q04637-6;Q04637-7;Q04637-8;Q04637-9;C9JF13;C9J6B6;C9J2Z7;C9K073;H7C044;H7C0V6	12	4	73.8836	0.0145023	0.00704016	1.20045	0.863838	CM55	PM54	176233	Eukaryotic translation initiation factor 4 gamma 1 OS=Homo sapiens OX=9606 GN=EIF4G1 PE=1 SV=4	818.112	792.624	827.44	663.927	634.116	733.003
P07951;Q5TCU8;K7EP68;U3KQK2	30	5	224.016	0.0145799	0.00706509	1.19601	0.862845	CM55	PM54	32964.8	Tropomyosin beta chain OS=Homo sapiens OX=9606 GN=TPM2 PE=1 SV=1	3457.96	3050.85	3034.58	2666.17	2679.35	2633.82
Q0VF49;A0A1B0GV91;H7C5G6	5	1	24.2966	0.0145898	0.00706509	3.63862	0.862718	PM54	CM55	135762	Uncharacterized protein KIAA2012 OS=Homo sapiens OX=9606 GN=KIAA2012 PE=2 SV=2	107.782	41.9264	112.602	332.257	355.345	266.848
P22102;P22102-2;F8WD69	3	1	15.6934	0.0146248	0.00707328	1.32421	0.862271	PM54	CM55	109022	Trifunctional purine biosynthetic protein adenosine-3 OS=Homo sapiens OX=9606 GN=GART PE=1 SV=1	906.493	1006.34	912.899	1311.68	1324.5	1105.69
O75145;O75145-2;R4GN36;R4GNF1	8	2	45.5406	0.0146619	0.00708245	1.19207	0.861797	CM55	PM54	134067	Liprin-alpha-3 OS=Homo sapiens OX=9606 GN=PPFIA3 PE=1 SV=3	1414.36	1431.12	1444.74	1107.23	1209.38	1282.36
P05455;E7ERC4;E9PFL9;E9PGX9	6	1	40.5148	0.0146882	0.00708245	1.6635	0.86146	PM54	CM55	47008.2	Lupus La protein OS=Homo sapiens OX=9606 GN=SSB PE=1 SV=2	603.605	675.573	556.016	1246.54	914.505	891.8
REVERSE23597	3	1	12.0692	0.0146981	0.00708245	28.1713	0.861334	PM54	CM55	112297	Reversed Sequence 23597	0	14.3567	0.531128	164.73	146.501	108.178
Q14980;A0A087WY61;Q14980-2;Q14980-3;Q14980-4;H0YFY6;F5H4J1;Q14980-5;K4DIE0;F5H6Y5	15	2	81.1697	0.0147208	0.00708463	3.33465	0.861045	PM54	CM55	239343	Nuclear mitotic apparatus protein 1 OS=Homo sapiens OX=9606 GN=NUMA1 PE=1 SV=2	31.5617	79.8266	74.0213	171.87	228.478	217.93
P07900;P07900-2;Q58FG0	41	18	301.285	0.014846	0.0071361	1.1041	0.85945	CM55	PM54	85059.1	Heat shock protein HSP 90-alpha OS=Homo sapiens OX=9606 GN=HSP90AA1 PE=1 SV=5	13018.6	13283.7	13643	11597.5	12178.7	12402.9
Q9H2U1;Q9H2U1-2;Q9H2U1-3;E7EWK3;A0A0G2JQU7;A0A0G2JRP3	5	1	26.1239	0.0148705	0.0071391	7.75757	0.859138	CM55	PM54	115673	ATP-dependent RNA helicase DHX36 OS=Homo sapiens OX=9606 GN=DHX36 PE=1 SV=2	920.095	781.74	257.686	75.1454	127.925	49.5242
REVERSE20274	5	1	19.4622	0.0151353	0.00725732	2.08112	0.855776	PM54	CM55	293684	Reversed Sequence 20274	183.46	282.642	327.812	490.388	547.904	613.939
REVERSE17519	2	1	8.3901	0.01538	0.00736562	2.33681	0.852684	CM55	PM54	130736	Reversed Sequence 17519	249.088	300.092	240.065	99.3095	159.623	78.8127
REVERSE13733	2	1	8.5201	0.0154529	0.00739145	2.62058	0.851767	CM55	PM54	84442.5	Reversed Sequence 13733	274.596	525.095	282.443	126.934	161.813	124.19
REVERSE12686	23	2	94.5409	0.0155873	0.00743468	1.15063	0.850077	PM54	CM55	360918	Reversed Sequence 12686	6213.96	6301.67	6767.18	7453.02	7083.51	7650.79
Q9UBI6	4	4	30.8581	0.0155995	0.00743468	1.18964	0.849923	CM55	PM54	8120.29	Guanine nucleotide-binding protein G(I)/G(S)/G(O) subunit gamma-12 OS=Homo sapiens OX=9606 GN=GNG12 PE=1 SV=3	2753.51	2512.83	2594.46	2068.49	2323.34	2215.9
REVERSE5971	7	2	36.5311	0.015612	0.00743468	1.18326	0.849766	PM54	CM55	241213	Reversed Sequence 5971	412.778	418.3	394.447	501.437	447.933	500.748
Q8WXX0;Q8WXX0-2;Q8WXX0-3	18	4	81.3565	0.0156263	0.00743468	2.74268	0.849587	PM54	CM55	464696	Dynein heavy chain 7_ axonemal OS=Homo sapiens OX=9606 GN=DNAH7 PE=1 SV=2	81.8225	137.982	56.2921	278.316	249.441	229.489
O75534;O75534-2;O75534-3;O75534-4;E9PLT0;E9PLD4;E9PKN4	6	3	32.52	0.0156384	0.00743468	1.5479	0.849435	PM54	CM55	89740.2	Cold shock domain-containing protein E1 OS=Homo sapiens OX=9606 GN=CSDE1 PE=1 SV=2	245.19	179.33	244.895	332.064	332.707	371.415
Q9H2T7	4	1	15.7686	0.0157114	0.0074576	9.54247	0.84852	CM55	PM54	126029	Ran-binding protein 17 OS=Homo sapiens OX=9606 GN=RANBP17 PE=2 SV=1	355.187	255.347	193.373	33.8703	6.5387	43.8362
REVERSE5991	5	1	19.9359	0.015744	0.0074576	26.2326	0.848112	PM54	CM55	172188	Reversed Sequence 5991	0	0	9.16581	79.208	47.2329	114.002
G5E9G7;Q9P2S2;Q9P2S2-2	6	1	24.3892	0.0157488	0.0074576	1.1726	0.848051	PM54	CM55	186224	Neurexin 2_ isoform CRA_a OS=Homo sapiens OX=9606 GN=NRXN2 PE=1 SV=1	389.088	361.713	370.575	431.868	416.867	466.195
P06748;P06748-2;P06748-3;E5RI98;E5RGW4	14	10	85.12	0.0157911	0.0074576	1.1731	0.847522	PM54	CM55	32746.2	Nucleophosmin OS=Homo sapiens OX=9606 GN=NPM1 PE=1 SV=2	10142.4	10528.1	10986	13080	12352.4	11703.8
A0A0A6YYA0;Q86XR7-2;Q9Y3B3;Q9Y3B3-2;G3V2Y2	4	3	24.1597	0.0158007	0.0074576	1.35818	0.847402	CM55	PM54	21575.1	Protein TMED7-TICAM2 OS=Homo sapiens OX=9606 GN=TMED7-TICAM2 PE=3 SV=1	1446.69	1375.22	1168.14	927.293	955.301	1055.21
P05198;G3V4T5;H0YJS4	6	4	36.21	0.0158011	0.0074576	1.1574	0.847397	PM54	CM55	36397.4	Eukaryotic translation initiation factor 2 subunit 1 OS=Homo sapiens OX=9606 GN=EIF2S1 PE=1 SV=3	1491.16	1598.66	1429.8	1686.56	1768.98	1775.47
REVERSE37052	3	1	14.2387	0.015883	0.00748721	1.8533	0.846374	PM54	CM55	50756.2	Reversed Sequence 37052	113.778	165.989	142.083	317.212	242.979	221.624
Q02156	1	1	4.0114	0.0159889	0.00752809	3.28397	0.845052	PM54	CM55	85042.6	Protein kinase C epsilon type OS=Homo sapiens OX=9606 GN=PRKCE PE=1 SV=1	31.2171	62.0643	90.4048	186.43	227.769	189.021
Q9UHD8;Q9UHD8-2;Q9UHD8-3;Q9UHD8-5;Q9UHD8-7;Q9UHD8-4;Q9UHD8-8;Q9UHD8-9;K7EL40;K7EIE4;K7EJL9;K7EK18;K7EQD7;K7ER14;K7ER52;K7EIR4;K7EJ51;K7EJZ2;K7EKN4;K7ELJ9;K7EN52;K7ENQ5;K7EQ08;K7ERG1	8	3	49.7568	0.0162823	0.00765699	1.16336	0.841408	CM55	PM54	65686.7	Septin-9 OS=Homo sapiens OX=9606 GN=SEPT9 PE=1 SV=2	750.235	723.33	727.792	585.704	649.621	656.916
REVERSE39827	13	3	54.978	0.016527	0.0077627	1.28267	0.838386	CM55	PM54	195220	Reversed Sequence 39827	968.942	971.134	1072.85	832.858	702.239	813.855
Q9BQS8;Q9BQS8-4;Q9BQS8-2;Q9BQS8-3	13	1	61.8162	0.0166357	0.00780103	1.3894	0.837047	CM55	PM54	168694	FYVE and coiled-coil domain-containing protein 1 OS=Homo sapiens OX=9606 GN=FYCO1 PE=1 SV=3	213.457	262.962	232.295	163.246	189.407	157.432
O75362	4	1	20.1917	0.0166485	0.00780103	7.67738	0.836891	CM55	PM54	117154	Zinc finger protein 217 OS=Homo sapiens OX=9606 GN=ZNF217 PE=1 SV=1	272.266	328.012	289.67	85.0627	11.0669	19.7885
P54136;P54136-2;E5RJM9	13	3	81.041	0.0168113	0.0078679	1.18959	0.834893	PM54	CM55	76177.5	Arginine--tRNA ligase_ cytoplasmic OS=Homo sapiens OX=9606 GN=RARS PE=1 SV=2	517.478	483.888	501.292	574.175	643.259	570.109
Q9Y3F4;Q9Y3F4-2;H0YH33	8	3	43.4863	0.0168596	0.00788106	1.39657	0.834302	CM55	PM54	38780.5	Serine-threonine kinase receptor-associated protein OS=Homo sapiens OX=9606 GN=STRAP PE=1 SV=1	584.201	587.483	467.333	363.52	403.819	406.265
Q8NEZ3;D6R9P6;Q8NEZ3-2	7	1	33.6501	0.0169629	0.00791988	1.60337	0.833039	PM54	CM55	153520	WD repeat-containing protein 19 OS=Homo sapiens OX=9606 GN=WDR19 PE=1 SV=2	223.519	272.227	319.301	493.121	406.198	407.505
P37108;H0YLA2	6	1	35.7977	0.0169993	0.00792741	1.14609	0.832595	CM55	PM54	14684	Signal recognition particle 14 kDa protein OS=Homo sapiens OX=9606 GN=SRP14 PE=1 SV=2	4346.83	3875.95	3996.31	3546.25	3567.62	3547.66
REVERSE8171	6	2	24.6819	0.0171529	0.00798949	1.8877	0.830725	PM54	CM55	118711	Reversed Sequence 8171	263.227	310.233	176.779	465.034	458.03	493.162
Q13885;Q9BVA1	36	7	322.062	0.0172886	0.00804163	1.14555	0.829078	CM55	PM54	50306.3	Tubulin beta-2A chain OS=Homo sapiens OX=9606 GN=TUBB2A PE=1 SV=1	12895.4	13117.5	12251.2	11280.9	10539.8	11581.5
Q15942;H0Y2Y8;Q15942-2;C9JJK5;H7C3D3;C9IZ41;H7C3R3	10	7	69.9326	0.017306	0.00804163	1.17841	0.828867	PM54	CM55	62475	Zyxin OS=Homo sapiens OX=9606 GN=ZYX PE=1 SV=1	1728.61	1611	1513.01	1867.17	1878.6	1972.61
Q9UKX5;Q9UKX5-2	2	1	8.8984	0.0174878	0.00811644	1.79769	0.826669	CM55	PM54	134611	Integrin alpha-11 OS=Homo sapiens OX=9606 GN=ITGA11 PE=1 SV=2	615.838	385.143	473.757	247.555	274.099	298.698
REVERSE10006	3	1	15.3686	0.0176409	0.00817778	3.10339	0.824825	PM54	CM55	154342	Reversed Sequence 10006	65.2938	158.892	148.665	389.149	311.796	456.157
Q5T1H1;Q5T1H1-1;H0Y3Q4	11	1	51.8303	0.0178034	0.00823995	27.6863	0.822874	PM54	CM55	363514	Protein eyes shut homolog OS=Homo sapiens OX=9606 GN=EYS PE=1 SV=5	17.1452	0	0	163.075	163.562	148.051
REVERSE40622	17	1	68.0376	0.0178171	0.00823995	2.00847	0.82271	PM54	CM55	197609	Reversed Sequence 40622	200.117	307.873	362.217	582.854	523.58	641.352
Q92608;E7ERW7;E5RFJ0;F6S220;Q92608-2;H0YB76	10	1	42.6733	0.0180416	0.00833391	1.96375	0.820028	PM54	CM55	213260	Dedicator of cytokinesis protein 2 OS=Homo sapiens OX=9606 GN=DOCK2 PE=1 SV=2	47.7378	45.4558	62.4698	114.017	116.24	75.4274
A8K2U0;A8K2U0-2;F5GXP1;F5GYG7;H0YGG5	4	1	14.6313	0.0181167	0.00835868	2.59639	0.819135	CM55	PM54	162532	Alpha-2-macroglobulin-like protein 1 OS=Homo sapiens OX=9606 GN=A2ML1 PE=1 SV=3	222.612	303.534	196.005	126.816	59.5368	91.784
Q14152;Q14152-2	10	2	49.7266	0.0182104	0.00837821	1.28748	0.818021	CM55	PM54	166969	Eukaryotic translation initiation factor 3 subunit A OS=Homo sapiens OX=9606 GN=EIF3A PE=1 SV=1	1332.19	1401.28	1199.06	1089.17	1035.82	929.432
P11047	19	3	89.6173	0.0182122	0.00837821	1.10797	0.817999	CM55	PM54	183306	Laminin subunit gamma-1 OS=Homo sapiens OX=9606 GN=LAMC1 PE=1 SV=3	3205.59	2990.53	3053.61	2876.98	2737.3	2734.05
Q07864;F5H1D6	13	2	54.3229	0.0182233	0.00837821	1.23666	0.817868	CM55	PM54	264199	DNA polymerase epsilon catalytic subunit A OS=Homo sapiens OX=9606 GN=POLE PE=1 SV=5	2068.7	2189.44	1931.48	1740.02	1532.49	1732.59
F5GWN9;F5H101;F8WE42;Q76FK4;Q76FK4-2;Q76FK4-4	1	1	4.5186	0.0183031	0.00839713	5.32467	0.816922	PM54	CM55	46795.9	Nucleolar protein 8 (Fragment) OS=Homo sapiens OX=9606 GN=NOL8 PE=1 SV=1	19.0181	16.5003	79.9524	205.64	217.091	192.113
E9PKZ0;G3V1A1;P62917;E9PKU4	4	3	25.1601	0.0183074	0.00839713	1.10422	0.816871	PM54	CM55	22617.4	60S ribosomal protein L8 (Fragment) OS=Homo sapiens OX=9606 GN=RPL8 PE=1 SV=1	1628.25	1608.15	1690.55	1886.18	1796.56	1757.7
D6R9I9;P61221;D6RGF4	4	1	27.6217	0.0183655	0.00841389	33.8157	0.816183	PM54	CM55	47949.5	ATP-binding cassette sub-family E member 1 OS=Homo sapiens OX=9606 GN=ABCE1 PE=1 SV=1	0	25.5874	0	293.424	288.207	283.626
A0A0U1RQC5;A0A0U1RRJ0;Q9HDB5;Q9Y4C0;A0A0C4DGK4;Q9HDB5-2;Q9HDB5-3;Q9HDB5-4;Q9Y4C0-3;Q9Y4C0-4	3	2	12.1772	0.0187319	0.00856419	1.15222	0.811868	CM55	PM54	185325	Neurexin-3-beta OS=Homo sapiens OX=9606 GN=NRXN3 PE=1 SV=1	2228.01	2450.26	2327.09	2092.11	1929.02	2058.76
REVERSE1172	7	2	32.2735	0.0187374	0.00856419	1.28092	0.811804	CM55	PM54	228085	Reversed Sequence 1172	2372.9	2846.48	2733.54	2094.68	1942.03	2172.07
P60660;F8W1R7;G3V1V0;P60660-2;B7Z6Z4;G8JLA2;J3KND3;F8VPF3;G3V1Y7;F8VZU9;F8W180;H0YI43;F8W1I5;P05976;P05976-2;P14649;F8VXL3	37	24	165.214	0.0188432	0.00860247	1.09445	0.810566	CM55	PM54	17101.2	Myosin light polypeptide 6 OS=Homo sapiens OX=9606 GN=MYL6 PE=1 SV=2	40575.2	41620.5	38723.8	36343.9	36548.6	37591.6
Q58DX5;Q58DX5-2	1	1	4.7627	0.0190253	0.00867546	2.27323	0.808441	CM55	PM54	89366	Inactive N-acetylated-alpha-linked acidic dipeptidase-like protein 2 OS=Homo sapiens OX=9606 GN=NAALADL2 PE=1 SV=3	129.741	219.643	252.975	93.4803	88.3742	83.1247
P07814;V9GYZ6;V9GZ76	21	5	115.108	0.0191842	0.00873773	1.066	0.806595	CM55	PM54	172188	Bifunctional glutamate/proline--tRNA ligase OS=Homo sapiens OX=9606 GN=EPRS PE=1 SV=5	2324.78	2316.46	2267.87	2197.26	2096.29	2187.76
H0Y599;Q8N1I0;Q8N1I0-2;Q8N1I0-3;H0Y7H7;C9J637;C9J7D9;C9JDB3;F8WES4	12	1	69.2721	0.0192414	0.00875359	1.45524	0.805932	CM55	PM54	230405	Dedicator of cytokinesis protein 4 (Fragment) OS=Homo sapiens OX=9606 GN=DOCK4 PE=1 SV=1	1371.8	1621.13	1862.63	1184.11	1122.72	1029.78
REVERSE2770	3	1	12.4093	0.0194693	0.00884312	1.28073	0.803299	CM55	PM54	115525	Reversed Sequence 2770	1247.93	1041.04	1087.14	858.949	940.156	836.982
P54886;P54886-2	10	5	46.8174	0.0194834	0.00884312	1.55288	0.803136	PM54	CM55	88043.8	Delta-1-pyrroline-5-carboxylate synthase OS=Homo sapiens OX=9606 GN=ALDH18A1 PE=1 SV=2	294.41	263.495	375.78	502.115	431.617	516.172
P08590	8	3	22.3096	0.0196266	0.00889777	1.16648	0.801491	PM54	CM55	22103.2	Myosin light chain 3 OS=Homo sapiens OX=9606 GN=MYL3 PE=1 SV=3	1904.52	1850.68	2056.52	2313.08	2143.15	2323.06
P53675;P53675-2;A0A087WX41;F5H5N6	26	4	147.503	0.019751	0.0089438	1.48514	0.800065	PM54	CM55	189140	Clathrin heavy chain 2 OS=Homo sapiens OX=9606 GN=CLTCL1 PE=1 SV=2	213.757	178.999	156.05	278.973	243.36	292.721
REVERSE12003	10	1	48.2675	0.0197892	0.00895069	1.4424	0.799629	PM54	CM55	110414	Reversed Sequence 12003	1245.4	1001.64	888.311	1485.61	1483.88	1552.94
O60518;A0A096LPA6;A0A096LNS2	10	2	54.6523	0.0198481	0.00896697	1.68999	0.798956	PM54	CM55	126254	Ran-binding protein 6 OS=Homo sapiens OX=9606 GN=RANBP6 PE=1 SV=2	115.943	138.276	108.842	227.288	159.577	226.708
P62851	6	5	36.3642	0.019895	0.00897778	1.21567	0.798421	PM54	CM55	13799.2	40S ribosomal protein S25 OS=Homo sapiens OX=9606 GN=RPS25 PE=1 SV=1	1944.74	1791.57	2120.57	2304.57	2351.31	2464.18
Q96QU1;A0A087WZ37;A0A087X250;A2A3D8;A2A3E6;A2A3E7;E7EM53;E7EMG0;A2A3E8;A0A087WTR6;A0A087WUA8;A0A087WZN9;A0A087WZW3;A0A087X1T6;A0A2R8Y6C0;A2A3E3;A9Z1W1;C9J4F3;Q96QU1-2;Q96QU1-4;Q96QU1-6;Q96QU1-3;A2A3E1;A2A3E4;A2A3E5;E7EM97;E7EMG8	8	1	34.8164	0.0201076	0.00906326	5.62907	0.796004	CM55	PM54	217438	Protocadherin-15 OS=Homo sapiens OX=9606 GN=PCDH15 PE=1 SV=2	183.919	273.494	225.437	12.7244	35.042	73.5414
P49368;B4DUR8;P49368-2;Q5SZX6;E9PRC8;E9PQ35;Q5SZW8;E9PM09;Q5SZX9	10	8	68.9704	0.0201476	0.00907084	1.21066	0.79555	CM55	PM54	61104.3	T-complex protein 1 subunit gamma OS=Homo sapiens OX=9606 GN=CCT3 PE=1 SV=4	3024.19	2945.36	2814.25	2559.12	2198.39	2497.87
Q14203;E7EX90;Q14203-3;Q14203-4;Q14203-6;Q14203-2;Q14203-5;Q6AWB1;E7EWF7	12	5	58.774	0.0202157	0.009091	1.56132	0.79478	PM54	CM55	142436	Dynactin subunit 1 OS=Homo sapiens OX=9606 GN=DCTN1 PE=1 SV=3	411.344	388.694	281.556	595.339	562.375	531.002
O75396;A0A087X1A9	3	3	23.5413	0.0204926	0.00920495	1.09722	0.791659	CM55	PM54	24821.5	Vesicle-trafficking protein SEC22b OS=Homo sapiens OX=9606 GN=SEC22B PE=1 SV=4	3212.59	3222.63	3368.37	2939.53	2900.59	3094.86
REVERSE29902	1	1	3.182	0.020542	0.00921654	1.63803	0.791105	CM55	PM54	157897	Reversed Sequence 29902	317.688	437.006	424.978	266.434	202.345	251.399
B4DJV2;O75390;A0A0C4DGI3;F8VTT8;F8W4S1;F8VPA1;F8VPF9;F8VRP1;F8VX07;F8VX68;F8VZK9;F8W1S4;F8W642;H0YH82;H0YIC4	4	1	28.1657	0.0206213	0.00924149	2.39358	0.790217	PM54	CM55	50660.1	Citrate synthase OS=Homo sapiens OX=9606 GN=CS PE=1 SV=1	69.7562	76.2054	149.016	209.075	267.361	229.616
P25092	5	2	25.2676	0.0207138	0.00927232	34.9488	0.789182	PM54	CM55	124430	Heat-stable enterotoxin receptor OS=Homo sapiens OX=9606 GN=GUCY2C PE=1 SV=2	0	19.2991	13.6393	350.963	385.106	415.088
Q86TM3	2	1	7.5043	0.0207704	0.00928702	2.56723	0.78855	CM55	PM54	71553.6	Probable ATP-dependent RNA helicase DDX53 OS=Homo sapiens OX=9606 GN=DDX53 PE=1 SV=3	197.131	398.756	319.93	152.458	106.543	97.7328
REVERSE3965	2	1	8.6005	0.0208494	0.00931168	1.49063	0.78767	CM55	PM54	159335	Reversed Sequence 3965	146.805	183.821	168.938	117.426	93.5172	124.192
O15054;O15054-1	5	1	16.6112	0.0211822	0.00944951	10.8579	0.783981	CM55	PM54	178286	Lysine-specific demethylase 6B OS=Homo sapiens OX=9606 GN=KDM6B PE=1 SV=4	398.972	196.796	79.8117	36.1098	18.3362	7.77406
A8MUS3;H7BY10;K7EJV9;K7ERT8;P62750;K7EMA7	4	2	27.4436	0.0212232	0.00945702	1.14129	0.783528	CM55	PM54	22030.2	60S ribosomal protein L23a OS=Homo sapiens OX=9606 GN=RPL23A PE=1 SV=1	5620.47	5348.34	5282.06	4986.87	4766.58	4485.58
Q13177;H7C1X3;B3KNX7;E9PM17;H0YCG5;Q13153;Q13153-2	3	1	15.1905	0.0213983	0.00952369	1.77381	0.781602	PM54	CM55	58327.9	Serine/threonine-protein kinase PAK 2 OS=Homo sapiens OX=9606 GN=PAK2 PE=1 SV=3	1073.26	1708.75	1432.15	2554.31	2113.27	2807.53
REVERSE10913	4	1	17.2208	0.0214216	0.00952369	19.7375	0.781347	PM54	CM55	204548	Reversed Sequence 10913	10.3318	0	7.21459	130.431	123.192	92.6983
Q9NXG0;Q9NXG0-2	4	1	15.2168	0.0215693	0.00957847	1.18516	0.779729	PM54	CM55	162199	Centlein OS=Homo sapiens OX=9606 GN=CNTLN PE=1 SV=6	903.14	911.243	889.245	1058.13	989.298	1156.79
P46939;P46939-2;P46939-4;Q5T097;P46939-3;A0A0D9SG57;H0Y337	31	4	147.644	0.0216665	0.00960478	1.34781	0.778667	CM55	PM54	396691	Utrophin OS=Homo sapiens OX=9606 GN=UTRN PE=1 SV=2	1419.1	1527.28	1631.19	1136.5	989.664	1270.14
P12814;H7C5W8;G3V2N5;G3V2W4;H0YJW3;H0YJ11;G3V2X9;G3V5M4;G3V2E8;G3V380	77	19	590.403	0.0217075	0.00960478	1.12449	0.77822	PM54	CM55	103628	Alpha-actinin-1 OS=Homo sapiens OX=9606 GN=ACTN1 PE=1 SV=2	4075.87	4274.98	4272.55	4890.39	4474.42	4830.03
Q5T5U3;A0A1B0GV73;E7ESW5;F8W9U9;Q5T5U3-3;A0A087WW76;A0A1B0GTZ9;H0Y468;A0A1B0GW11;H0Y5T2;Q5JSD8	19	3	97.1261	0.0217184	0.00960478	2.82989	0.778102	PM54	CM55	218700	Rho GTPase-activating protein 21 OS=Homo sapiens OX=9606 GN=ARHGAP21 PE=1 SV=1	68.6498	82.834	179.546	280.95	370.449	285.381
REVERSE19901	10	2	41.9799	0.0217269	0.00960478	1.30724	0.77801	CM55	PM54	152651	Reversed Sequence 19901	480.145	568.101	575.48	380.818	418.846	442.443
Q2LD37;Q2LD37-4;Q2LD37-7;Q2LD37-6;H0Y781;H3BLT5;Q2LD37-2;H7C0Y8	30	2	139.822	0.0218035	0.00962747	2.05926	0.777177	PM54	CM55	559703	Transmembrane protein KIAA1109 OS=Homo sapiens OX=9606 GN=KIAA1109 PE=1 SV=2	287.15	217.041	154.766	408.916	403.145	544.906
REVERSE40509	1	1	3.4217	0.0218274	0.00962747	1.20122	0.776916	CM55	PM54	100728	Reversed Sequence 40509	1036.27	1074.79	1029.65	933.348	791.253	890.005
Q12907;D6RBV2;D6RIU4;D6RDX1	9	2	51.5938	0.0218674	0.00963421	1.51925	0.776483	CM55	PM54	40570.9	Vesicular integral-membrane protein VIP36 OS=Homo sapiens OX=9606 GN=LMAN2 PE=1 SV=1	594.997	514.844	632.605	439.339	313.839	393.734
Q03001-8;E7ETB9;Q6P0N6;H0Y314;H0Y4F5;H0Y6T5;H0YC82;Q03001-10;H0YBX0	49	3	221.98	0.0222214	0.00977917	1.26102	0.772659	CM55	PM54	594173	Isoform 2 of Dystonin OS=Homo sapiens OX=9606 GN=DST	806.978	677.979	690.701	540.726	599.072	585.513
Q9Y6V0;Q9Y6V0-6;Q9Y6V0-3	24	1	105.97	0.0223982	0.00984589	1.48506	0.770763	CM55	PM54	562525	Protein piccolo OS=Homo sapiens OX=9606 GN=PCLO PE=1 SV=5	368.271	274.849	333.83	191.294	232.786	233.77
A0A087X0S5;P12109	4	1	18.0401	0.0225169	0.00988692	4.14918	0.769495	PM54	CM55	109423	Collagen alpha-1(VI) chain OS=Homo sapiens OX=9606 GN=COL6A1 PE=1 SV=1	14.3251	29.3208	15.0638	44.0578	72.1992	127.34
Q15691	7	1	44.769	0.0228025	0.00998103	19.7731	0.766458	PM54	CM55	30170.2	Microtubule-associated protein RP/EB family member 1 OS=Homo sapiens OX=9606 GN=MAPRE1 PE=1 SV=3	8.97351	10.1418	0	124.142	145.269	108.558
P47897;P47897-2;A0A1B0GVU9;B4DDN1;A0A0U1RQT0;A0A0U1RQM8;A0A0U1RQU2;C9J165;F2Z2V6;A0A0U1RQQ5;A0A0U1RQX5;A0A0U1RQX9;A0A1B0GTT3;H7C0R3	9	4	51.1557	0.0228091	0.00998103	1.50902	0.766389	PM54	CM55	88711.3	Glutamine--tRNA ligase OS=Homo sapiens OX=9606 GN=QARS PE=1 SV=1	343.501	454.935	506.005	626.592	675.355	666.488
O00410;O00410-3;H0Y8C6;O00410-2;E7EQT5;E7ETV3;E7EV12;C9JMV5;C9JZ53;E7EWK4;E7EX05;H0Y3V4;C9J875;C9JQT6;C9JXE0;C9JZD8;E7ESA1;E7ESZ1;E7ETV8	17	8	120.317	0.0228271	0.00998103	1.66145	0.766198	PM54	CM55	125113	Importin-5 OS=Homo sapiens OX=9606 GN=IPO5 PE=1 SV=4	711.99	457.433	705.593	1046.74	1059.1	1009.4
P50851;E9PEM5;P50851-2	7	1	26.4683	0.0228334	0.00998103	2.67968	0.766131	PM54	CM55	321789	Lipopolysaccharide-responsive and beige-like anchor protein OS=Homo sapiens OX=9606 GN=LRBA PE=1 SV=4	189.882	80.7625	195.437	376.942	426.523	445.483
REVERSE13671	2	1	8.173	0.0228612	0.00998203	1.705	0.765837	PM54	CM55	81490.6	Reversed Sequence 13671	1051.66	624.513	739.007	1379.07	1419.21	1319.59
P13796;Q5TBN3	9	1	49.2836	0.0229433	0.0100041	1.19785	0.76497	CM55	PM54	70858.8	Plastin-2 OS=Homo sapiens OX=9606 GN=LCP1 PE=1 SV=6	247.589	217.145	226.4	192.303	202.943	181.731
P54750;P54750-4;P54750-5;P54750-2;P54750-3;P54750-6;P54750-7;P54750-8;P54750-9	3	1	12.0963	0.0229629	0.0100041	2.7882	0.764763	PM54	CM55	61480.2	Calcium/calmodulin-dependent 3'_5'-cyclic nucleotide phosphodiesterase 1A OS=Homo sapiens OX=9606 GN=PDE1A PE=2 SV=2	93.2888	143.38	51.6863	298.796	226.917	278.279
P05386	3	3	16.5932	0.0232064	0.0100989	1.18276	0.762202	CM55	PM54	11628	60S acidic ribosomal protein P1 OS=Homo sapiens OX=9606 GN=RPLP1 PE=1 SV=1	11740.1	12616.5	13637.3	10738.6	11005.2	10379.3
Q14573	17	1	76.292	0.0232753	0.0101176	1.28515	0.761481	PM54	CM55	307016	Inositol 1_4_5-trisphosphate receptor type 3 OS=Homo sapiens OX=9606 GN=ITPR3 PE=1 SV=2	16216	18055.7	15161.4	23270.9	20225.1	20033
P55268;F5H520	3	1	13.9206	0.0235064	0.0102026	2.5793	0.759069	CM55	PM54	203110	Laminin subunit beta-2 OS=Homo sapiens OX=9606 GN=LAMB2 PE=1 SV=2	269.253	183.073	219.925	77.4658	129.872	53.2959
Q8TDJ6;Q8TDJ6-2;Q8TDJ6-3;H0YLM8	5	1	17.9641	0.023523	0.0102026	3.57077	0.758898	PM54	CM55	343178	DmX-like protein 2 OS=Homo sapiens OX=9606 GN=DMXL2 PE=1 SV=2	44.4538	54.4185	159.509	300.4	349.303	272.915
Q15746;Q15746-2;Q15746-3;Q15746-4;Q15746-6;Q15746-5;Q15746-11;Q15746-7;Q15746-9;D6R9C2	5	1	29.3458	0.0235535	0.0102045	1.23603	0.75858	PM54	CM55	213453	Myosin light chain kinase_ smooth muscle OS=Homo sapiens OX=9606 GN=MYLK PE=1 SV=4	166.898	177.786	204.294	228.365	221.856	228.335
P13611;P13611-5;P13611-3;E9PF17;P13611-2;D6RGZ6;P13611-4;Q86W61	16	3	67.7941	0.0236062	0.010216	1.40011	0.758032	PM54	CM55	374816	Versican core protein OS=Homo sapiens OX=9606 GN=VCAN PE=1 SV=3	487.558	447.482	359.148	625.793	565.884	620.323
P27348;E9PG15	13	6	113.665	0.0239264	0.0103431	1.08856	0.754725	CM55	PM54	28049.4	14-3-3 protein theta OS=Homo sapiens OX=9606 GN=YWHAQ PE=1 SV=1	3299.58	3380.95	3190.91	3126.95	2973.48	2967.92
REVERSE10900	5	1	20.2896	0.0241274	0.0104185	4.49805	0.752661	CM55	PM54	295539	Reversed Sequence 10900	213.215	271.347	370.617	112.69	53.1298	24.3023
Q8N2C7;Q8N2C7-4;Q8N2C7-7	11	2	41.1438	0.0242376	0.0104439	1.28822	0.751535	PM54	CM55	367383	Protein unc-80 homolog OS=Homo sapiens OX=9606 GN=UNC80 PE=1 SV=2	487.66	400.274	494.626	595.283	618.833	566.923
Q08AF3	3	1	14.5624	0.0242396	0.0104439	1.70256	0.751515	CM55	PM54	102595	Schlafen family member 5 OS=Homo sapiens OX=9606 GN=SLFN5 PE=1 SV=1	206.808	179.779	223.64	127.158	142.239	89.0207
Q9Y4I1;Q9Y4I1-3;A0A087WY00;F8W6H6;G3V394;Q9Y4I1-2;F8WE88;O95317;Q9UES5;E7ERV5	18	2	84.9226	0.0243149	0.0104648	2.00656	0.750747	CM55	PM54	217116	Unconventional myosin-Va OS=Homo sapiens OX=9606 GN=MYO5A PE=1 SV=2	200.109	213.401	235.171	153.568	91.478	78.2333
REVERSE27744	1	1	4.6644	0.0245292	0.0105454	2.53372	0.74857	PM54	CM55	37749.5	Reversed Sequence 27744	68.6961	161.218	137.355	364.045	307.074	259.437
A0FGR8;A0A087WXU3;A0FGR8-2;A0FGR8-4;A0FGR8-6;H7BXI1	3	3	12.8393	0.0246467	0.0105843	1.16646	0.747381	CM55	PM54	102871	Extended synaptotagmin-2 OS=Homo sapiens OX=9606 GN=ESYT2 PE=1 SV=1	982.239	997.609	902.67	811.397	786.607	873.159
Q9H254;C9JY79;M0QZQ3;Q9H254-4;Q9H254-2;Q9H254-3;Q9H254-5;M0R1V6	22	4	114.038	0.0247513	0.010615	1.22982	0.746326	CM55	PM54	290183	Spectrin beta chain_ non-erythrocytic 4 OS=Homo sapiens OX=9606 GN=SPTBN4 PE=1 SV=2	475.843	403.439	397.978	341.681	351.786	345.106
Q86W24	9	1	42.667	0.0247726	0.010615	1.73017	0.746112	CM55	PM54	127699	NACHT_ LRR and PYD domains-containing protein 14 OS=Homo sapiens OX=9606 GN=NLRP14 PE=1 SV=1	825.114	579.712	689.842	348.978	505.613	356.083
REVERSE4248	9	2	36.3544	0.0248011	0.0106156	3.42897	0.745825	CM55	PM54	522161	Reversed Sequence 4248	880.481	1076.7	868.5	354.602	113.963	355.496
O95786;O95786-2;A2A376	5	1	26.4646	0.0250016	0.0106897	4.06716	0.743814	CM55	PM54	108083	Probable ATP-dependent RNA helicase DDX58 OS=Homo sapiens OX=9606 GN=DDX58 PE=1 SV=2	359.815	296.542	313.657	101.924	27.8831	108.692
Q92558;Q5SZK5	2	1	9.6516	0.0250625	0.010704	2.93767	0.743205	PM54	CM55	61937.5	Wiskott-Aldrich syndrome protein family member 1 OS=Homo sapiens OX=9606 GN=WASF1 PE=1 SV=1	397.563	282.363	128.036	845.708	779.778	748.037
REVERSE12226	3	2	17.9696	0.0253701	0.0108161	1.46458	0.740143	CM55	PM54	80366.2	Reversed Sequence 12226	312.915	307.927	362.479	269.407	206.418	195.575
A4UGR9;A4UGR9-2;A4UGR9-8;A4UGR9-3;A0A0A0MQZ3	38	6	171.168	0.0253803	0.0108161	1.09232	0.740042	CM55	PM54	384125	Xin actin-binding repeat-containing protein 2 OS=Homo sapiens OX=9606 GN=XIRP2 PE=1 SV=2	1817.64	1916.35	1976.4	1764.23	1731.12	1732.4
Q9UBS4	5	1	30.4307	0.0255032	0.0108566	1.73582	0.738827	CM55	PM54	40799.1	DnaJ homolog subfamily B member 11 OS=Homo sapiens OX=9606 GN=DNAJB11 PE=1 SV=1	427.537	650.084	463.936	334.834	305.416	247.839
P67775;P67775-2;P62714;E5RFI3;E5RHC1;E5RHP4;E7ESG8;H0YBN9;H0YC23;E5RI56;H3BTA2;H3BV22;P60510	7	6	54.2788	0.0256933	0.0109256	1.08038	0.736953	CM55	PM54	36164.5	Serine/threonine-protein phosphatase 2A catalytic subunit alpha isoform OS=Homo sapiens OX=9606 GN=PPP2CA PE=1 SV=1	1945.92	1902.95	1864.24	1809.7	1778.35	1700.01
F8VS81;Q12792;Q12792-3;Q12792-4;F8W1Q9	5	2	24.399	0.0257853	0.0109528	3.66222	0.73605	PM54	CM55	33636.1	Twinfilin-1 (Fragment) OS=Homo sapiens OX=9606 GN=TWF1 PE=1 SV=1	42.3545	81.5034	184.605	392.235	369.389	368.036
M0QX70;M0QYR7;M0QZC7;M0QZH1;M0R2N0;Q9H0W8;Q9H0W8-2	1	1	4.2756	0.0258637	0.0109604	2.18456	0.735281	PM54	CM55	12925.6	Protein SMG9 (Fragment) OS=Homo sapiens OX=9606 GN=SMG9 PE=1 SV=1	208.536	106.696	213.058	347.958	365.704	440.42
Q2V2M9;K7ER94;Q2V2M9-2;Q2V2M9-3;Q2V2M9-4;A0A0A0MTS9;K7EP24;K7EKZ0	8	1	32.4092	0.025884	0.0109604	2.39869	0.735083	CM55	PM54	159697	FH1/FH2 domain-containing protein 3 OS=Homo sapiens OX=9606 GN=FHOD3 PE=1 SV=2	282.697	523.765	411.33	230.422	125.657	151.611
Q9Y4K0;H0YAP6	4	2	17.8279	0.0258873	0.0109604	1.65543	0.735051	PM54	CM55	88834.9	Lysyl oxidase homolog 2 OS=Homo sapiens OX=9606 GN=LOXL2 PE=1 SV=1	113.627	78.2551	84.5169	151.259	128.587	177.714
P49588;P49588-2;H3BPK7	14	4	71.9186	0.0265414	0.0112252	3.1822	0.728707	PM54	CM55	107552	Alanine--tRNA ligase_ cytoplasmic OS=Homo sapiens OX=9606 GN=AARS PE=1 SV=2	88.8304	249.67	74.2125	404.154	479.831	429.352
REVERSE9939	5	2	22.0447	0.0266692	0.0112651	1.97438	0.72748	PM54	CM55	142270	Reversed Sequence 9939	37.9151	57.9672	53.9691	95.7438	75.1088	125.012
A0A0A0MRF9;P16885;H3BPZ3;H3BQV5	11	1	51.9562	0.0266934	0.0112651	8.92072	0.727248	PM54	CM55	147258	Phosphoinositide phospholipase C OS=Homo sapiens OX=9606 GN=PLCG2 PE=1 SV=1	15.7774	244.964	70.8114	904.856	1057.49	995.344
Q9C0C2;Q9C0C2-2;A0A2R8Y5C4;E9PKE7;E9PKK0	17	2	86.1326	0.0268572	0.011322	1.27943	0.725683	CM55	PM54	182822	182 kDa tankyrase-1-binding protein OS=Homo sapiens OX=9606 GN=TNKS1BP1 PE=1 SV=4	2038.14	2322.02	2506.6	1675.47	1779.06	1912.5
Q969V3;Q969V3-2;K7EMW4;A0A0C4DGP7;K7ELZ9;K7EN96;K7ENM2	4	1	18.5568	0.0269555	0.0113499	1.5665	0.724746	PM54	CM55	63145.6	Nicalin OS=Homo sapiens OX=9606 GN=NCLN PE=1 SV=2	193.875	307.684	260.588	381.897	405.07	406.938
Q96L73;Q96L73-2;D6RA58	4	1	18.0506	0.0269978	0.0113499	4.66933	0.724343	PM54	CM55	302298	Histone-lysine N-methyltransferase_ H3 lysine-36 and H4 lysine-20 specific OS=Homo sapiens OX=9606 GN=NSD1 PE=1 SV=1	17.2798	73.8367	76.6567	229.522	227.922	325.943
P19525;P19525-2	4	1	19.6883	0.0270104	0.0113499	2.0886	0.724224	CM55	PM54	62550.6	Interferon-induced_ double-stranded RNA-activated protein kinase OS=Homo sapiens OX=9606 GN=EIF2AK2 PE=1 SV=2	281.842	330.372	185.246	115.078	159.807	106.931
REVERSE4172	3	1	13.0077	0.0270485	0.0113537	1.35364	0.723862	CM55	PM54	121399	Reversed Sequence 4172	1686.56	1692.1	1364.37	1262.74	1057.13	1184.04
P39023;G5E9G0;B5MCW2;H7C422;H7C3M2;F8WCR1	8	6	47.3944	0.0273544	0.0114689	1.24066	0.720969	PM54	CM55	46394.1	60S ribosomal protein L3 OS=Homo sapiens OX=9606 GN=RPL3 PE=1 SV=2	1381.86	1316.92	1486.39	1783.31	1558.11	1850.98
P26641;P26641-2	13	8	70.0225	0.0273817	0.0114689	1.09654	0.720713	PM54	CM55	50461	Elongation factor 1-gamma OS=Homo sapiens OX=9606 GN=EEF1G PE=1 SV=3	3455.2	3505.43	3745.68	3842.76	3902.6	3994.56
Q8N3K9	5	1	28.2237	0.0276152	0.0115287	5.60205	0.718522	PM54	CM55	451036	Cardiomyopathy-associated protein 5 OS=Homo sapiens OX=9606 GN=CMYA5 PE=1 SV=3	15.6995	130.565	37.7367	340.38	319.748	370.659
P23246;P23246-2;H0Y9K7;H0Y9U2	6	3	34.1945	0.0276212	0.0115287	1.98684	0.718466	CM55	PM54	76263.6	Splicing factor_ proline- and glutamine-rich OS=Homo sapiens OX=9606 GN=SFPQ PE=1 SV=2	172.171	195.496	241.142	127.834	69.0597	109.528
O60506;O60506-2;O60506-3;O60506-4;B7Z645;F6UXX1;O60506-5	10	4	65.206	0.027632	0.0115287	1.18796	0.718365	CM55	PM54	69830.8	Heterogeneous nuclear ribonucleoprotein Q OS=Homo sapiens OX=9606 GN=SYNCRIP PE=1 SV=2	1438.32	1540.39	1660.07	1371.54	1240.67	1292.62
REVERSE1494	19	1	83.4085	0.0276424	0.0115287	1.47888	0.718268	PM54	CM55	281212	Reversed Sequence 1494	255.715	229.497	251.101	291.743	378.815	418.36
A0A1B0GVP4	5	2	20.0005	0.0277205	0.0115435	2.24102	0.717539	PM54	CM55	214111	Ligand-dependent nuclear receptor corepressor-like protein OS=Homo sapiens OX=9606 GN=LCORL PE=1 SV=1	214.786	234.337	135.611	563.376	431.451	315.573
P30050;P30050-2	7	6	54.3088	0.027737	0.0115435	1.0595	0.717384	PM54	CM55	17989.7	60S ribosomal protein L12 OS=Homo sapiens OX=9606 GN=RPL12 PE=1 SV=1	4114.77	4226.5	4132.18	4534.26	4317.18	4364.23
P31153;P31153-2	4	1	19.6687	0.0279306	0.0116117	1.52377	0.715584	CM55	PM54	44002.9	S-adenosylmethionine synthase isoform type-2 OS=Homo sapiens OX=9606 GN=MAT2A PE=1 SV=1	738.832	560.323	768.406	500.466	465.602	390.806
F5H6I7;Q6DD88;F5GWF8	9	5	60.4532	0.0282363	0.0117263	1.15054	0.712758	CM55	PM54	59229.3	Atlastin-3 OS=Homo sapiens OX=9606 GN=ATL3 PE=1 SV=1	1048.04	998.893	1139.25	916.098	950.361	902.829
P06753-2;A0A087WWU8;P06753-3;P06753-6;Q5HYB6;Q5VU61;D6R904;D6RFM2	19	1	184.423	0.0282971	0.0117391	19.7676	0.712199	PM54	CM55	29260.8	Isoform 2 of Tropomyosin alpha-3 chain OS=Homo sapiens OX=9606 GN=TPM3	11.5588	0	12.5091	139.392	122.686	213.685
Q2KHR2;H0YLX2;Q2KHR2-2	7	2	27.2265	0.0285029	0.0118119	1.73951	0.710312	CM55	PM54	147865	DNA-binding protein RFX7 OS=Homo sapiens OX=9606 GN=RFX7 PE=1 SV=1	82.2812	127.314	130.401	58.5318	66.0616	70.8618
P51148;P51148-2;K7ERI8;K7ERQ8;K7ENY4;K7EIP6	5	1	31.5835	0.0286473	0.0118592	1.25397	0.708994	CM55	PM54	23710.7	Ras-related protein Rab-5C OS=Homo sapiens OX=9606 GN=RAB5C PE=1 SV=2	1184.67	1016.84	1115.12	903.914	944.72	796.277
Q86VX9;A0A0A0MSQ9;Q86VX9-2;Q86VX9-3;Q86VX9-4;Q86VX9-5	4	1	18.3201	0.0287076	0.0118716	1.44134	0.708445	CM55	PM54	73465.2	Vacuolar fusion protein MON1 homolog A OS=Homo sapiens OX=9606 GN=MON1A PE=1 SV=3	372.823	382.931	479.628	246.336	315.788	294.981
P48444;B0YIW6;P48444-2;Q6P1Q5	9	2	49.9837	0.0287499	0.0118724	1.12544	0.70806	CM55	PM54	57666.7	Coatomer subunit delta OS=Homo sapiens OX=9606 GN=ARCN1 PE=1 SV=1	1123.98	1027.29	1021.83	910.92	943.82	964.703
A0A0C4DFS1;A0A0G2JI07;A0A0G2JL35;A0A140T9A1;A0A140T9I7;A0A140T9N0;A0A140T9N1;A0A140T9W8;A0A140T9X7;A0A140TA43;A0A140TA54;A2AAS7;H0YIS1;P13942;P13942-2;P13942-3;P13942-4;P13942-5;P13942-6;P13942-7;P13942-8;P13942-9;Q4VXY6	2	1	9.1837	0.0287956	0.0118724	3.51862	0.707645	PM54	CM55	172573	COL11A2 OS=Homo sapiens OX=9606 GN=COL11A2 PE=1 SV=1	14.928	54.6577	48.0011	119.826	146.114	147.803
Q8TF62	2	1	7.6889	0.0288007	0.0118724	1.26654	0.7076	CM55	PM54	137123	Probable phospholipid-transporting ATPase IM OS=Homo sapiens OX=9606 GN=ATP8B4 PE=1 SV=3	3532.22	3121.68	3159.36	2399.7	2896.74	2451.68
Q14204;A0A2R8Y706;A0A2R8YFZ7;A0A2R8Y5T0;A0A2R8Y6H2;A0A2R8Y542;A0A2R8Y6I5;A0A2R8YGC7;H0YJ21	69	35	452.049	0.0289802	0.0119338	1.0776	0.705974	CM55	PM54	535146	Cytoplasmic dynein 1 heavy chain 1 OS=Homo sapiens OX=9606 GN=DYNC1H1 PE=1 SV=5	2568.83	2645.62	2745.71	2476.29	2408.83	2501.81
A8TX70;A8TX70-2;E9PAL5;H0Y935	14	2	61.3976	0.0290193	0.0119345	2.31494	0.705622	CM55	PM54	291979	Collagen alpha-5(VI) chain OS=Homo sapiens OX=9606 GN=COL6A5 PE=1 SV=1	636.607	318.652	607.874	242.892	187.037	245.31
G3V279;P84090	1	1	6.743	0.0290429	0.0119345	1.45049	0.705408	CM55	PM54	8374.43	Enhancer of rudimentary homolog OS=Homo sapiens OX=9606 GN=ERH PE=1 SV=1	1516.22	1492.48	1170.85	894	881.707	1105.77
F8VWH9;Q8N6T3;Q8N6T3-2;Q8N6T3-5;E5RHH7;Q8N6T3-4;E5RHT6;F8W1U7;Q8N6T3-3;E5RHC5	4	2	23.8577	0.0291943	0.011984	1.33795	0.704046	CM55	PM54	37223.2	ADP-ribosylation factor GTPase-activating protein 1 OS=Homo sapiens OX=9606 GN=ARFGAP1 PE=1 SV=1	383.517	305.801	300.393	249.338	259.709	230.676
Q8N163;H0YB24;Q8N163-2;G3V119	4	2	22.2493	0.0292342	0.0119879	1.20859	0.703687	PM54	CM55	103529	Cell cycle and apoptosis regulator protein 2 OS=Homo sapiens OX=9606 GN=CCAR2 PE=1 SV=2	452.633	394.357	420.478	507.086	548.384	476.381
D6RG30;Q2TB18;Q2TB18-2	2	1	8.0394	0.0293218	0.0120085	1.39324	0.702902	CM55	PM54	81289.2	Asteroid homolog 1 (Drosophila)_ isoform CRA_c OS=Homo sapiens OX=9606 GN=ASTE1 PE=1 SV=1	1009.92	906.905	1056.04	846.324	644.953	642.503
E9PMR3;Q9BUR4;E9PMG4	2	1	10.2389	0.0293461	0.0120085	2.06848	0.702684	CM55	PM54	31268.1	Telomerase Cajal body protein 1 OS=Homo sapiens OX=9606 GN=WRAP53 PE=1 SV=1	410.988	270.931	265.151	106.707	166.584	184.568
Q92817;K7EKI0	6	1	23.7908	0.0293803	0.0120099	4.20116	0.702379	PM54	CM55	232916	Envoplakin OS=Homo sapiens OX=9606 GN=EVPL PE=1 SV=3	31.9743	167.281	98.8432	460.67	364.065	427.624
O94887	2	1	10.3982	0.0294635	0.0120314	1.43551	0.701635	CM55	PM54	120801	FERM_ ARHGEF and pleckstrin domain-containing protein 2 OS=Homo sapiens OX=9606 GN=FARP2 PE=1 SV=3	833.125	665.052	630.358	466.261	455.209	561.301
REVERSE28040	5	2	20.3012	0.0295956	0.0120537	1.73885	0.700459	CM55	PM54	201961	Reversed Sequence 28040	416.108	439.665	406.974	232.675	319.141	174.379
REVERSE25944	15	1	55.6348	0.0296334	0.0120537	1.32242	0.700123	CM55	PM54	286322	Reversed Sequence 25944	778.787	968.532	799.87	621.882	703.355	600.927
Q96NW7;A0A075B6E9;Q96NW7-2	3	1	15.9205	0.0296365	0.0120537	2.7589	0.700095	CM55	PM54	173836	Leucine-rich repeat-containing protein 7 OS=Homo sapiens OX=9606 GN=LRRC7 PE=1 SV=1	215.258	84.4552	161.762	54.0378	63.807	49.4232
REVERSE32606	5	1	26.47	0.0296415	0.0120537	1.37008	0.700051	CM55	PM54	87044.4	Reversed Sequence 32606	3599.56	4508.57	3544.38	2668.82	3142.63	2693.54
P49189;P49189-2	8	1	48.0891	0.0299078	0.0121493	13.2069	0.697693	PM54	CM55	54714.5	4-trimethylaminobutyraldehyde dehydrogenase OS=Homo sapiens OX=9606 GN=ALDH9A1 PE=1 SV=3	0	0	14.3715	51.6338	66.3812	71.7875
E3W994;J3KR49;O75122;A0A0U1RQI6;E7ERI8;E7EW49;O75122-3;B3KR06;C9J668;D6RBU8;E7ENG2;O75122-2	3	1	14.0985	0.0299745	0.0121638	1.13862	0.697106	CM55	PM54	139663	CLIP-associating protein 2 OS=Homo sapiens OX=9606 GN=CLASP2 PE=1 SV=2	415.4	390.778	395.977	354.842	371.507	329.448
D6RF86;P55285;P55285-2	5	1	20.5953	0.0300187	0.0121691	1.61348	0.696716	PM54	CM55	67802	Cadherin-6 OS=Homo sapiens OX=9606 GN=CDH6 PE=1 SV=1	818.295	779.463	588.812	1339.28	953.146	1235.56
P07195;A8MW50;C9J7H8;F5H793	15	11	96.4689	0.0302438	0.0122476	1.15358	0.694742	CM55	PM54	36923.7	L-lactate dehydrogenase B chain OS=Homo sapiens OX=9606 GN=LDHB PE=1 SV=2	10274.3	9378.71	9625.41	8666.46	8814.87	7899.23
REVERSE39167	5	1	24.5928	0.0305409	0.0123551	1.55119	0.692153	PM54	CM55	244107	Reversed Sequence 39167	485.113	739.486	731.746	1038.42	999.81	996.441
P10768;X6RA14;H7BZT7;U3KQT1	6	2	41.0921	0.0308081	0.0124504	1.23557	0.68984	PM54	CM55	31976.1	S-formylglutathione hydrolase OS=Homo sapiens OX=9606 GN=ESD PE=1 SV=2	2158.33	1900.82	1886.42	2252.59	2656.25	2437.3
O14802;R4GMX2	4	1	23.9399	0.0309729	0.012504	2.55574	0.688422	CM55	PM54	157638	DNA-directed RNA polymerase III subunit RPC1 OS=Homo sapiens OX=9606 GN=POLR3A PE=1 SV=2	97.858	220.314	138.999	43.7195	65.4006	69.7597
Q5T447;Q5T447-2	2	2	8.8967	0.0311334	0.0125558	3.03561	0.687047	PM54	CM55	98196.6	E3 ubiquitin-protein ligase HECTD3 OS=Homo sapiens OX=9606 GN=HECTD3 PE=1 SV=1	73.3768	81.021	25.2811	197.74	164.63	183.065
Q92598;Q92598-2;Q92598-3;Q92598-4;A0A0A0MSM0;R4GN69	9	1	51.9029	0.0313652	0.0126363	1.14275	0.68507	CM55	PM54	97777.6	Heat shock protein 105 kDa OS=Homo sapiens OX=9606 GN=HSPH1 PE=1 SV=1	1513.04	1410.96	1378.06	1317.19	1259.93	1187.52
P21926;A0A2R8Y478;A6NNI4;G8JLH6	4	1	24.1481	0.0317529	0.0127793	1.34526	0.681788	CM55	PM54	25986.4	CD9 antigen OS=Homo sapiens OX=9606 GN=CD9 PE=1 SV=4	2111.93	1811.08	1562.22	1391.73	1304.52	1381.22
Q99550;A0A0A0MTP3;Q99550-2;J3KNE4	4	1	10.9912	0.0323353	0.01299	4.60803	0.676919	CM55	PM54	133766	M-phase phosphoprotein 9 OS=Homo sapiens OX=9606 GN=MPHOSPH9 PE=1 SV=4	125.851	411.244	452.974	59.6546	94.0974	61.1052
O94762;O94762-4	1	1	4.4273	0.032343	0.01299	1.52041	0.676856	PM54	CM55	110569	ATP-dependent DNA helicase Q5 OS=Homo sapiens OX=9606 GN=RECQL5 PE=1 SV=2	210.072	266.107	236.857	372.022	291.125	420.959
Q8NEV8-2;Q8NEV8;E9PPH6;F5GXG5;A0A087WZJ0	15	1	67.3059	0.0324532	0.0130209	4.51516	0.675942	PM54	CM55	223085	Isoform 2 of Exophilin-5 OS=Homo sapiens OX=9606 GN=EXPH5	178.707	69.4153	26.3798	362.361	433.018	444.04
REVERSE39630	6	1	23.5626	0.0324944	0.0130241	1.83795	0.675601	PM54	CM55	79512.5	Reversed Sequence 39630	186.354	185.575	150.519	244.633	286.125	429.475
Q8TE73;E9PJD0;E9PK72;E9PKK3;E9PNW6	35	6	163.896	0.0332281	0.0133002	1.08309	0.669589	PM54	CM55	532843	Dynein heavy chain 5_ axonemal OS=Homo sapiens OX=9606 GN=DNAH5 PE=1 SV=3	2096.63	2040.19	2150.85	2216.71	2360.15	2233.27
REVERSE37570	12	2	53.7685	0.0332513	0.0133002	1.38159	0.669401	CM55	PM54	149068	Reversed Sequence 37570	246.12	197.18	218.269	149.087	185.686	144.074
REVERSE11909	4	1	14.7498	0.0333456	0.0133226	22.9951	0.668637	PM54	CM55	60960.7	Reversed Sequence 11909	5.69278	10.0814	193.476	355.784	2002.33	2453.63
Q8IWV8;Q8IWV8-4;Q8IWV8-2;Q8IWV8-3	9	1	38.6811	0.0333757	0.0133226	1.84015	0.668394	CM55	PM54	203960	E3 ubiquitin-protein ligase UBR2 OS=Homo sapiens OX=9606 GN=UBR2 PE=1 SV=1	186.541	224.035	241.857	163.842	88.806	101.906
Q9UFN0;Q9BS92	4	1	21.6312	0.0334332	0.013332	2.01201	0.667929	PM54	CM55	28580.7	Protein NipSnap homolog 3A OS=Homo sapiens OX=9606 GN=NIPSNAP3A PE=1 SV=2	305.592	316.943	154.775	552.461	504.433	507.061
REVERSE16362	2	1	8.1539	0.0334885	0.0133401	20.8462	0.667482	PM54	CM55	118001	Reversed Sequence 16362	5.19045	0	63.7676	495.269	410.921	531.322
REVERSE2718	2	1	11.9985	0.0335217	0.0133401	1.69504	0.667214	CM55	PM54	61627.7	Reversed Sequence 2718	12399	15046.5	10509.3	6188.75	6685.73	9517.2
F8W9U4;P27816-3	11	1	77.4074	0.0336485	0.0133769	1.35398	0.666194	PM54	CM55	89018.2	Microtubule-associated protein OS=Homo sapiens OX=9606 GN=MAP4 PE=1 SV=1	468.453	404.224	511.028	692.305	550.44	630.758
Q8IZT6;Q8IZT6-2;Q5VYL4	31	4	135.094	0.0343038	0.0136235	1.12957	0.66097	CM55	PM54	413451	Abnormal spindle-like microcephaly-associated protein OS=Homo sapiens OX=9606 GN=ASPM PE=1 SV=2	1264.76	1284.43	1265.25	1164.89	1040.28	1171.74
O15078;J3KNF5;S4R322;A0A0A0MS86;F8VS29;F8W097;F8W0V9	32	2	135.843	0.0343557	0.0136294	1.08329	0.66056	PM54	CM55	291071	Centrosomal protein of 290 kDa OS=Homo sapiens OX=9606 GN=CEP290 PE=1 SV=2	232.44	245.709	252.384	260.779	262.734	267.867
REVERSE40097	2	1	11.044	0.0343882	0.0136294	1.53973	0.660303	CM55	PM54	77625.4	Reversed Sequence 40097	440.245	388.526	350.715	276.72	196.861	292.455
REVERSE14607	4	1	16.2117	0.0347532	0.0137601	1.18497	0.657436	PM54	CM55	227708	Reversed Sequence 14607	1409.25	1394.2	1556.45	1608.9	1852.45	1705.01
REVERSE26840	5	2	17.7078	0.0348546	0.0137702	3.3722	0.656644	CM55	PM54	215270	Reversed Sequence 26840	176.462	114.937	134.795	59.7309	50.403	16.2509
Q9BSA4;B4DKD1	2	1	5.1372	0.0348588	0.0137702	1.10586	0.656611	PM54	CM55	59856	Protein tweety homolog 2 OS=Homo sapiens OX=9606 GN=TTYH2 PE=1 SV=3	6269.94	6251.68	6838.09	7258.72	7199.45	6951.04
Q13464;A0A0U1RQV4	17	1	75.6497	0.0348845	0.0137702	1.67768	0.65641	PM54	CM55	159201	Rho-associated protein kinase 1 OS=Homo sapiens OX=9606 GN=ROCK1 PE=1 SV=1	190.488	179.866	134.352	301.971	218.376	326.389
M0QYR1;P08621;P08621-2;P08621-3	1	1	5.3305	0.0349883	0.0137972	1.31889	0.655602	PM54	CM55	11476	U1 small nuclear ribonucleoprotein 70 kDa (Fragment) OS=Homo sapiens OX=9606 GN=SNRNP70 PE=1 SV=1	154.284	147.364	185.557	193.261	216.344	232.964
Q96Q15;J3KRA9;Q96Q15-2;Q96Q15-3;H3BQN7;Q96Q15-4	16	2	73.4361	0.0350968	0.0138261	1.98586	0.65476	CM55	PM54	414607	Serine/threonine-protein kinase SMG1 OS=Homo sapiens OX=9606 GN=SMG1 PE=1 SV=3	1044.67	633.212	557.237	349.188	439.364	336.963
REVERSE17186	1	1	3.5828	0.0352672	0.0138792	1.33303	0.653441	PM54	CM55	105354	Reversed Sequence 17186	247.569	279.4	335.698	378.184	364.979	406.795
C9J066;E9PN67;Q8N4C6;Q8N4C6-10;Q8N4C6-2;Q8N4C6-4;Q8N4C6-5;Q8N4C6-7;Q8N4C6-9;H0YDJ4;H9KV85;Q8N4C6-11;Q8N4C6-6	15	3	64.1391	0.0353791	0.0139092	1.52398	0.652577	CM55	PM54	240189	Ninein OS=Homo sapiens OX=9606 GN=NIN PE=1 SV=1	1490.32	1261.26	1030.12	938.12	831.137	712.211
P43034;I3L3N5;P43034-2;I3L495	7	2	38.0236	0.0361157	0.0141846	1.25026	0.646952	CM55	PM54	47208.3	Platelet-activating factor acetylhydrolase IB subunit alpha OS=Homo sapiens OX=9606 GN=PAFAH1B1 PE=1 SV=2	1093.04	951.874	918.364	857.27	725.043	787.815
A0A087X119;A6NC89;Q96NU0;Q9BZ76;Q9BZ76-2;A0A087WXL9;A0A087WZ03;B1AM99;B1AMA2;A0A087WUG9;A0A1B0GTE1;F2Z2X5;F2Z2X6;Q96NU0-2;A0A2P0CT92;A0A087X0T4	7	1	29.0412	0.036426	0.0142921	2.48573	0.644612	PM54	CM55	133647	Contactin-associated protein-like 3B OS=Homo sapiens OX=9606 GN=CNTNAP3B PE=4 SV=1	51.6787	32.5854	83.2389	135.562	176.422	104.384
Q70CQ2;Q70CQ2-2;Q70CQ2-3;H7C183;A0A0C4DG73;H7C150	23	6	89.7435	0.0366543	0.0143672	1.27611	0.642902	PM54	CM55	409994	Ubiquitin carboxyl-terminal hydrolase 34 OS=Homo sapiens OX=9606 GN=USP34 PE=1 SV=2	540.444	435.851	509.467	689.953	588.705	617.337
Q8IYD8;Q8IYD8-3;H0YJS3;H0YJ14;Q8IYD8-2	5	1	27.71	0.036869	0.0144369	3.07984	0.641302	PM54	CM55	234986	Fanconi anemia group M protein OS=Homo sapiens OX=9606 GN=FANCM PE=1 SV=2	145.135	46.1236	162.324	372.192	399.757	317.03
O75717;C9JYB3	6	1	28.4849	0.0372884	0.0145755	3.08746	0.638199	PM54	CM55	127450	WD repeat and HMG-box DNA-binding protein 1 OS=Homo sapiens OX=9606 GN=WDHD1 PE=1 SV=1	289.543	87.0866	295.288	773.156	602.864	698.494
REVERSE19469	2	1	13.5192	0.0372974	0.0145755	1.36313	0.638132	CM55	PM54	125763	Reversed Sequence 19469	119.637	103.345	90.3065	69.0696	84.47	76.2915
P42574	1	1	4.4018	0.0380328	0.014848	1.78833	0.632767	CM55	PM54	32064.2	Caspase-3 OS=Homo sapiens OX=9606 GN=CASP3 PE=1 SV=2	200.583	321.438	304.357	171.233	120.999	169.863
Q5THJ4;Q5THJ4-2;H3BLS7;A0A2R8YD87;F5GX56;A0A2R8Y876	29	2	140.608	0.0381282	0.0148704	1.7932	0.632078	CM55	PM54	495680	Vacuolar protein sorting-associated protein 13D OS=Homo sapiens OX=9606 GN=VPS13D PE=1 SV=2	262.789	244.527	413.978	153.549	200.577	159.645
P46778;G3V1B3;M0R181	4	2	24.6187	0.0382919	0.0149146	1.10806	0.630899	PM54	CM55	18621.9	60S ribosomal protein L21 OS=Homo sapiens OX=9606 GN=RPL21 PE=1 SV=2	3089.89	3376.66	3074.65	3626.37	3498.5	3447.31
REVERSE7157	3	1	13.0108	0.0383537	0.0149146	2.07428	0.630455	PM54	CM55	46421.3	Reversed Sequence 7157	204.186	293.774	125.03	470.975	448.97	372.312
REVERSE27114	6	2	29.884	0.0383562	0.0149146	1.41894	0.630437	PM54	CM55	87143.6	Reversed Sequence 27114	798.113	598.853	885.687	1104.29	1030.71	1103.96
P62910;D3YTB1;F8W727	2	1	6.3476	0.0387288	0.0150404	1.21215	0.627774	PM54	CM55	15973.9	60S ribosomal protein L32 OS=Homo sapiens OX=9606 GN=RPL32 PE=1 SV=2	2054.81	1705	1957.1	2200.34	2280.19	2449.24
Q01484;I6L894;Q01484-2;Q01484-5;D6RHE1;E9PHW9;A0A0U1RQN6;B7Z651;A0A087WZU3;H0Y8Y2	28	5	115.907	0.0387567	0.0150404	1.22879	0.627576	CM55	PM54	436224	Ankyrin-2 OS=Homo sapiens OX=9606 GN=ANK2 PE=1 SV=4	790.158	847.48	938.928	688.288	759.391	649.158
Q9UDY4;C9JUL4	3	1	17.855	0.0388333	0.0150552	13.7253	0.627031	PM54	CM55	38035	DnaJ homolog subfamily B member 4 OS=Homo sapiens OX=9606 GN=DNAJB4 PE=1 SV=1	0	29.7246	5.13659	146.945	201.627	129.91
P30049	1	1	6.7914	0.0390461	0.0151227	1.29954	0.625524	CM55	PM54	17490	ATP synthase subunit delta_ mitochondrial OS=Homo sapiens OX=9606 GN=ATP5F1D PE=1 SV=2	1344.75	1229.86	1085.44	1024.95	834.731	956.744
Q9NYC9;E7EP17;Q9NYC9-2;Q9NYC9-3	25	5	105.472	0.0393421	0.0152223	1.32234	0.623441	PM54	CM55	515927	Dynein heavy chain 9_ axonemal OS=Homo sapiens OX=9606 GN=DNAH9 PE=1 SV=3	702.95	597.399	826.628	919.204	921.892	971.499
P39656;A0A0C4DGS1;P39656-2;P39656-3;U3KQ84	6	1	30.9197	0.0396134	0.0153121	1.84793	0.621543	PM54	CM55	50972	Dolichyl-diphosphooligosaccharide--protein glycosyltransferase 48 kDa subunit OS=Homo sapiens OX=9606 GN=DDOST PE=1 SV=4	378.338	612.309	770.306	1037.26	1008.32	1208.54
P32856;P32856-2;P32856-3	3	1	11.6632	0.0396603	0.015315	1.30499	0.621217	PM54	CM55	33398.1	Syntaxin-2 OS=Homo sapiens OX=9606 GN=STX2 PE=1 SV=3	922.309	1024.08	1006.55	1090.05	1419.57	1343.95
Q7Z408;A0A087X0K4;Q7Z408-4;Q7Z408-2;Q5T6B5	12	1	59.6177	0.0400623	0.015455	2.90345	0.61843	PM54	CM55	387738	CUB and sushi domain-containing protein 2 OS=Homo sapiens OX=9606 GN=CSMD2 PE=1 SV=2	81.9276	105.348	30.6018	235.004	230.542	167.05
O95071;E7EMW7;O95071-2;E5RFK7	18	3	79.2266	0.0401079	0.0154574	1.67106	0.618115	PM54	CM55	312546	E3 ubiquitin-protein ligase UBR5 OS=Homo sapiens OX=9606 GN=UBR5 PE=1 SV=2	143.401	263.627	215.995	364.73	331.001	345.379
D6R9P3;D6RBZ0;D6RD18;Q99729-2;Q99729-3;Q99729;Q99729-4	6	2	45.9685	0.0401747	0.0154678	1.13658	0.617655	CM55	PM54	30416.9	Heterogeneous nuclear ribonucleoprotein A/B OS=Homo sapiens OX=9606 GN=HNRNPAB PE=1 SV=1	1981.32	2128.02	1843.52	1755.89	1718.12	1763.51
Q96Q89;Q96Q89-2;Q96Q89-4;Q96Q89-3;A0A0A0MSJ5	16	3	73.9963	0.0412116	0.0158514	1.71171	0.610603	PM54	CM55	211998	Kinesin-like protein KIF20B OS=Homo sapiens OX=9606 GN=KIF20B PE=1 SV=3	107.816	134.355	195.776	226.039	287.988	235.611
F5GWS9	1	1	5.178	0.041383	0.0159017	18.0332	0.609453	PM54	CM55	8906.23	LTO1_ ABCE1 maturation factor OS=Homo sapiens OX=9606 GN=LTO1 PE=1 SV=1	0	15.9757	32.212	277.543	294.564	296.872
P40925;P40925-3;B9A041;P40925-2;B8ZZ51;C9JF79;C9JRL4;C9JLV6	12	5	69.7763	0.041425	0.0159022	1.1294	0.609172	CM55	PM54	36654.3	Malate dehydrogenase_ cytoplasmic OS=Homo sapiens OX=9606 GN=MDH1 PE=1 SV=4	3656	3788.78	3374.17	3139.18	3105.13	3335.06
Q6R327;Q6R327-3;D6R9S6;Q6R327-4	6	1	22.0932	0.0415028	0.0159053	1.21348	0.608652	CM55	PM54	194328	Rapamycin-insensitive companion of mTOR OS=Homo sapiens OX=9606 GN=RICTOR PE=1 SV=1	3205.38	3024.73	3048.01	2517.33	2281.36	2847.17
REVERSE35115	4	1	16.1998	0.0415145	0.0159053	3.06726	0.608574	PM54	CM55	62749.9	Reversed Sequence 35115	73.6216	299.942	223.742	575.449	669.955	586.685
P46100;P46100-2;P46100-3;P46100-4;P46100-5;P46100-6;A0A096LNL9;A0A096LNW1	9	1	39.2706	0.0418981	0.0160366	2.60516	0.606024	CM55	PM54	285038	Transcriptional regulator ATRX OS=Homo sapiens OX=9606 GN=ATRX PE=1 SV=5	103.511	110.011	89.3928	17.4448	40.7965	58.0341
P78527;P78527-2	21	3	101.9	0.0419902	0.0160561	1.2302	0.605415	CM55	PM54	474051	DNA-dependent protein kinase catalytic subunit OS=Homo sapiens OX=9606 GN=PRKDC PE=1 SV=3	311.976	286.845	311.267	268.314	255.585	215.893
REVERSE17895	13	1	65.2113	0.0422268	0.0161308	2.38529	0.603857	PM54	CM55	152598	Reversed Sequence 17895	37.6948	111.762	79.2148	184.653	198.693	162.102
O75718;C9JP16	5	1	34.4353	0.0426347	0.0162499	1.51275	0.601189	CM55	PM54	47189.3	Cartilage-associated protein OS=Homo sapiens OX=9606 GN=CRTAP PE=1 SV=1	1364.85	987.703	1249.65	899.61	840.515	641.105
Q9NXW2;J3KPS0;Q9NXW2-2;V9GYN7	5	2	27.7537	0.0426538	0.0162499	1.09646	0.601065	CM55	PM54	42046.8	DnaJ homolog subfamily B member 12 OS=Homo sapiens OX=9606 GN=DNAJB12 PE=1 SV=4	10270.5	9758.26	9344.13	9150.37	8686.04	8952.35
REVERSE36208	2	1	12.6813	0.0426633	0.0162499	2.19584	0.601003	PM54	CM55	127450	Reversed Sequence 36208	15.041	24.0661	16.8229	40.1676	56.1552	26.4906
Q12955;A0A087WTF3;Q12955-4;Q12955-5;A0A087WTP5;A0A087X0B4;A0A087WTE8;A0A087WVC2;Q12955-6;Q12955-7	29	2	126.996	0.0428763	0.0163151	1.35767	0.599621	CM55	PM54	482692	Ankyrin-3 OS=Homo sapiens OX=9606 GN=ANK3 PE=1 SV=3	350.06	382.366	305.528	241.071	226.1	297.342
REVERSE6848	6	1	29.7041	0.0429194	0.0163156	3.92845	0.599342	PM54	CM55	140367	Reversed Sequence 6848	88.9168	115.17	20.2876	253.829	317.67	309.947
P51587	25	3	103.315	0.0432633	0.0164304	1.23825	0.597125	CM55	PM54	388537	Breast cancer type 2 susceptibility protein OS=Homo sapiens OX=9606 GN=BRCA2 PE=1 SV=3	645.573	703.998	561.555	485.848	522.014	535.548
Q10567;Q10567-2;Q10567-3;Q10567-4;C9J1E7;H7C034;K7EJ01	14	2	78.8675	0.0441256	0.0167416	1.19403	0.591642	CM55	PM54	105549	AP-1 complex subunit beta-1 OS=Homo sapiens OX=9606 GN=AP1B1 PE=1 SV=2	402.443	466.344	391.309	355.789	334.383	365.16
Q9UIJ7;Q9UIJ7-2	1	1	4.4396	0.0442414	0.0167692	13.3636	0.590913	PM54	CM55	25565.4	GTP:AMP phosphotransferase AK3_ mitochondrial OS=Homo sapiens OX=9606 GN=AK3 PE=1 SV=4	16.0225	0	14.8953	159.253	134.587	119.332
Q92896;Q92896-2;Q92896-3;H3BM42;H3BQT1	6	3	28.1283	0.0445555	0.0168719	1.44244	0.588947	PM54	CM55	138430	Golgi apparatus protein 1 OS=Homo sapiens OX=9606 GN=GLG1 PE=1 SV=2	214.976	156.805	186.364	225.53	304.742	274.821
A6NM62	2	1	8.6722	0.0449833	0.0169988	1.38531	0.586289	PM54	CM55	142167	Leucine-rich repeat-containing protein 53 OS=Homo sapiens OX=9606 GN=LRRC53 PE=4 SV=2	487.265	689.223	602.028	823.767	740.475	899.561
REVERSE10642	9	1	52.1766	0.0449858	0.0169988	1.30819	0.586274	PM54	CM55	85761.4	Reversed Sequence 10642	1471.77	1215.29	1302.63	1527.89	1971.28	1720.11
Q9BQB6;E9PLN8;F8W9H0;I3L3B4;Q9BQB6-2;Q9BQB6-3	3	2	18.8743	0.0450506	0.0169988	1.17475	0.585874	CM55	PM54	18633.7	Vitamin K epoxide reductase complex subunit 1 OS=Homo sapiens OX=9606 GN=VKORC1 PE=1 SV=1	2069.83	1766.65	1946.49	1739.35	1616.72	1566.67
P68371;M0R2D3;M0QY85;M0QX14;M0QY37;M0QZL7;M0R0X0;G3V3J6;G3V3W7;G3V4U2;M0R2T4;A0A075B724	57	21	364.548	0.04507	0.0169988	1.14356	0.585754	CM55	PM54	50287.4	Tubulin beta-4B chain OS=Homo sapiens OX=9606 GN=TUBB4B PE=1 SV=1	8729.79	9063.61	7844.47	7634.6	7246.46	7538.36
Q8IUG5;Q8IUG5-3;Q8IUG5-2;F5H6I8;H0YGQ4;A0A2Q2TCQ6	13	2	66.0858	0.0451255	0.0169988	1.15788	0.585412	PM54	CM55	287382	Unconventional myosin-XVIIIb OS=Homo sapiens OX=9606 GN=MYO18B PE=1 SV=2	216.053	206.792	204.833	222.743	262.575	241.459
P30153;C9J9C1;B3KQV6;E9PH38	16	8	105.869	0.0451516	0.0169988	1.20747	0.585251	CM55	PM54	66107.1	Serine/threonine-protein phosphatase 2A 65 kDa regulatory subunit A alpha isoform OS=Homo sapiens OX=9606 GN=PPP2R1A PE=1 SV=4	1391.94	1429.35	1697.17	1222.73	1231.18	1288.17
P36578;H3BM89;H3BTP7;H3BU31	16	14	93.7012	0.0455828	0.0171426	1.118	0.582607	PM54	CM55	47982.5	60S ribosomal protein L4 OS=Homo sapiens OX=9606 GN=RPL4 PE=1 SV=5	2445.87	2498.22	2555.72	2945.52	2604.53	2834.73
D6RIW8;Q9NW82	4	1	18.1508	0.0456213	0.0171426	1.83339	0.582372	PM54	CM55	43753.6	WD repeat-containing protein 70 OS=Homo sapiens OX=9606 GN=WDR70 PE=1 SV=1	47.6055	83.8035	96.6998	134.739	156.634	126.84
Q71F56;H0YIQ7;H0YIQ9;H0YHC1	14	2	64.6102	0.0456759	0.0171466	1.24744	0.58204	CM55	PM54	245510	Mediator of RNA polymerase II transcription subunit 13-like OS=Homo sapiens OX=9606 GN=MED13L PE=1 SV=1	366.764	390.073	339.958	311.643	312.537	255.055
C9JAB2;Q16629;Q16629-4;A0A0B4J1Z1;Q16629-2;Q16629-3	3	1	21.8283	0.0462681	0.0173523	1.2699	0.578456	CM55	PM54	27156.2	Serine/arginine-rich-splicing factor 7 OS=Homo sapiens OX=9606 GN=SRSF7 PE=1 SV=1	602.786	529.054	683.107	445.206	504.947	479.051
Q03112;Q03112-3;Q03112-4;Q03112-8	2	1	8.0541	0.046425	0.0173945	13.7057	0.577514	PM54	CM55	139904	MDS1 and EVI1 complex locus protein OS=Homo sapiens OX=9606 GN=MECOM PE=1 SV=3	0	0	106.564	464.189	492.084	504.264
P48047;H7C068;H7C0C1	5	5	26.7573	0.0465301	0.0174171	1.18384	0.576885	PM54	CM55	23391.4	ATP synthase subunit O_ mitochondrial OS=Homo sapiens OX=9606 GN=ATP5PO PE=1 SV=1	1004.07	1212.4	1194.62	1345.26	1345.92	1346.99
Q9HAQ2;B4DZK5;C9JWZ7;Q9HAQ2-2	2	1	10.0784	0.0468896	0.0175268	2.83244	0.574743	PM54	CM55	90328.8	Kinesin-like protein KIF9 OS=Homo sapiens OX=9606 GN=KIF9 PE=1 SV=4	309.816	265.815	109.083	612.315	889.938	437.166
REVERSE25083	8	1	36.4892	0.0469128	0.0175268	1.62694	0.574606	CM55	PM54	58021.4	Reversed Sequence 25083	794.164	743.342	479.807	378.898	430.17	430.874
P68032;P62736;P63267;P68133;P63267-2;A6NL76;C9JFL5;F6QUT6;F6UVQ4	41	12	397.246	0.0470605	0.0175652	1.23609	0.573731	CM55	PM54	42361.2	Actin_ alpha cardiac muscle 1 OS=Homo sapiens OX=9606 GN=ACTC1 PE=1 SV=1	6727.62	6796.01	6441.22	6147.66	4754.13	5249.85
Q13618;A0A087WTG3;Q13618-2;Q13618-3	3	1	11.7033	0.0473332	0.0176501	2.00489	0.572123	PM54	CM55	89500.7	Cullin-3 OS=Homo sapiens OX=9606 GN=CUL3 PE=1 SV=2	109.302	57.5673	47.7132	119.121	153.206	157.888
Q9NRV9;F5GWX2;H0YG71	4	1	16.4216	0.0474689	0.0176838	1.13988	0.571327	PM54	CM55	21211.2	Heme-binding protein 1 OS=Homo sapiens OX=9606 GN=HEBP1 PE=1 SV=1	759.803	745.796	706.362	905.392	826.826	789.152
Q7RTW8;A0A2R8YG28;Q7RTW8-4;Q7RTW8-5	2	1	9.6889	0.0477386	0.0177574	1.73653	0.56975	CM55	PM54	129616	Otoancorin OS=Homo sapiens OX=9606 GN=OTOA PE=1 SV=1	999.148	849.712	592.882	521.573	516.11	368.419
Q9BS26	3	1	16.496	0.0477572	0.0177574	1.44159	0.569642	CM55	PM54	47370.5	Endoplasmic reticulum resident protein 44 OS=Homo sapiens OX=9606 GN=ERP44 PE=1 SV=1	273.695	358.644	353.264	200.567	209.839	273.285
Q86UW6;Q86UW6-2;H0YA93	9	2	39.9963	0.0478325	0.0177685	1.32153	0.569203	PM54	CM55	200569	NEDD4-binding protein 2 OS=Homo sapiens OX=9606 GN=N4BP2 PE=1 SV=2	266.045	200.172	192.27	285.369	289.937	294.905
P62280;M0QZC5;M0R1H5	6	6	50.5624	0.0482795	0.0179175	1.05193	0.566615	PM54	CM55	18601.8	40S ribosomal protein S11 OS=Homo sapiens OX=9606 GN=RPS11 PE=1 SV=3	2037.17	1944.91	2002.95	2070.38	2148.72	2076.75
E9PAV3;E9PAV3-2;F8VZJ2;H0YHX9;Q13765;F8W0W4;F8VNW4;F8W1N5;F8VZ58;Q9BZK3	10	3	71.5875	0.048504	0.0179837	1.17196	0.565325	CM55	PM54	206106	Nascent polypeptide-associated complex subunit alpha_ muscle-specific form OS=Homo sapiens OX=9606 GN=NACA PE=1 SV=1	2231.33	1941.13	1902.89	1773.66	1766.54	1643.74
REVERSE22805	3	1	13.1729	0.0487361	0.0180527	1.37594	0.563996	CM55	PM54	162699	Reversed Sequence 22805	620.824	835.395	820.665	508.83	531.068	614.883
O60763;O60763-2	7	3	40.9607	0.0489988	0.0181328	1.27204	0.562501	PM54	CM55	108808	General vesicular transport factor p115 OS=Homo sapiens OX=9606 GN=USO1 PE=1 SV=2	408.027	513.734	510.025	586.157	574.349	660.789
O75494;O75494-2;O75494-3;O75494-4;O75494-5;O75494-6;Q5JRI1;Q6IQ42	2	1	12.1101	0.0491894	0.0181861	2.25045	0.561421	CM55	PM54	31357.6	Serine/arginine-rich splicing factor 10 OS=Homo sapiens OX=9606 GN=SRSF10 PE=1 SV=1	51.0794	96.9839	117.172	39.7426	46.2991	31.8173
O60934;E2QRP0;E5RGU1	2	1	8.9985	0.0493725	0.0182274	2.77906	0.560387	PM54	CM55	85643.5	Nibrin OS=Homo sapiens OX=9606 GN=NBN PE=1 SV=1	57.0543	21.0038	20.6667	64.5091	129.757	80.0966
Q02750;G5E9C7;P36507;Q02750-2	2	1	8.1953	0.049414	0.0182274	2.12353	0.560154	PM54	CM55	43781.3	Dual specificity mitogen-activated protein kinase kinase 1 OS=Homo sapiens OX=9606 GN=MAP2K1 PE=1 SV=2	1495.13	889.312	548.647	2093.23	2318.27	1817
Q7KZF4;H7C597	21	12	113.12	0.0494411	0.0182274	1.17027	0.560001	CM55	PM54	102681	Staphylococcal nuclease domain-containing protein 1 OS=Homo sapiens OX=9606 GN=SND1 PE=1 SV=1	2067.89	1852.33	1977.84	1572.28	1837.06	1630.58
O94979;D6REX3;D6RHZ5;O94979-10;O94979-2;O94979-3;O94979-4;O94979-5;O94979-6;O94979-8;O94979-9;H7BXG7;O94979-7;H0Y9T9;H0YAB3	4	1	20.4881	0.0495945	0.0182667	1.76988	0.55914	PM54	CM55	133984	Protein transport protein Sec31A OS=Homo sapiens OX=9606 GN=SEC31A PE=1 SV=3	256.625	216.835	444.108	524.267	593.445	506.272
REVERSE26218	3	1	11.7555	0.0497363	0.0183017	1.34439	0.558346	PM54	CM55	94474	Reversed Sequence 26218	1298.18	1110.78	1222.53	1926.6	1552.33	1403.2
M0QYS1;P40429;Q8J015	3	1	28.6543	0.0499238	0.0183534	1.10006	0.5573	CM55	PM54	24161.8	60S ribosomal protein L13a (Fragment) OS=Homo sapiens OX=9606 GN=RPL13A PE=1 SV=2	1612.4	1732.78	1563.04	1526.41	1448.49	1486.89
P62269;J3JS69	4	2	35.6077	0.0501757	0.0184238	1.05686	0.5559	CM55	PM54	17718.7	40S ribosomal protein S18 OS=Homo sapiens OX=9606 GN=RPS18 PE=1 SV=3	2362.04	2308.57	2439.84	2207.21	2294.56	2226.11
Q9NS69	2	1	11.0902	0.0502094	0.0184238	2.64986	0.555713	PM54	CM55	15521.7	Mitochondrial import receptor subunit TOM22 homolog OS=Homo sapiens OX=9606 GN=TOMM22 PE=1 SV=3	41.9338	89.9152	159.54	301.75	216.241	254.147
E9PFD7;P00533;P00533-3;P00533-4;Q504U8;A0A1W2PRR9;P00533-2;C9JYS6	4	1	18.5797	0.0504882	0.0185087	9.60226	0.554174	CM55	PM54	132476	Receptor protein-tyrosine kinase OS=Homo sapiens OX=9606 GN=EGFR PE=1 SV=3	87.9252	131.343	152.325	38.6985	0	0
P50748;E7ES84;P50748-2;H0YFL5	3	1	13.5507	0.0507611	0.0185913	8.85601	0.552676	PM54	CM55	253372	Kinetochore-associated protein 1 OS=Homo sapiens OX=9606 GN=KNTC1 PE=1 SV=1	0	7.73794	11.9431	72.371	47.6165	54.3085
A0A140T8Y3;A0A140T902;A0A140T9C0;A0A140TA33;A0A140TA41;A0A140TA52;P22105;P22105-1;P22105-4;A0A140T8Z8;A0A140T956;A0A087WWA5;A0A087X0I0;A0A140T9L7;P22105-2;A0A140T923;Q16473	20	2	84.3357	0.0509359	0.0186378	1.69172	0.551721	CM55	PM54	463160	Tenascin-X OS=Homo sapiens OX=9606 GN=TNXB PE=1 SV=1	662.084	449.851	372.319	313.895	307.614	255.857
P42702	6	1	30.1305	0.0510044	0.0186454	5.74455	0.551347	CM55	PM54	125169	Leukemia inhibitory factor receptor OS=Homo sapiens OX=9606 GN=LIFR PE=1 SV=1	476.679	433.475	113.523	98.2076	57.2607	22.7314
P54278;A0A2R8Y6S3;C9J167;P54278-2;P54278-3;P54278-4	11	1	56.427	0.0510953	0.0186597	8.82868	0.550852	PM54	CM55	96994.3	Mismatch repair endonuclease PMS2 OS=Homo sapiens OX=9606 GN=PMS2 PE=1 SV=2	5.11096	0	10.9852	25.685	63.1283	53.2942
P09848;H0Y4E4	6	1	25.6946	0.0511389	0.0186597	1.13947	0.550615	CM55	PM54	219670	Lactase-phlorizin hydrolase OS=Homo sapiens OX=9606 GN=LCT PE=1 SV=3	1685.37	1802.87	1942.62	1614.27	1634.19	1517.69
Q13310;B1ANR0;Q13310-2;Q13310-3;H0Y5F5;B1ANR1;E5RGH3;E5RJB9;H0YEQ8;E5RH24;H0YBN4;E5RHG7;H0Y6X6;H0YCC8;H0YEU6	8	1	57.2776	0.0512317	0.018666	1.78366	0.550112	PM54	CM55	71125.2	Polyadenylate-binding protein 4 OS=Homo sapiens OX=9606 GN=PABPC4 PE=1 SV=1	163.803	98.3106	213.767	287.87	282.619	278.321
K7EL66;K7ERD8;M0QX52;Q15555;Q15555-2;Q15555-3;Q15555-4;Q15555-5	1	1	5.3681	0.0512517	0.018666	14.3549	0.550003	PM54	CM55	15035.1	Microtubule-associated protein RP/EB family member 2 (Fragment) OS=Homo sapiens OX=9606 GN=MAPRE2 PE=1 SV=1	0	88.7002	9.38268	550.081	432.092	425.795
Q99460;A0A087WW66;Q99460-2;C9J9M4;H7C378;H7BZR6	13	2	71.3213	0.052067	0.0189453	1.29399	0.545619	CM55	PM54	106863	26S proteasome non-ATPase regulatory subunit 1 OS=Homo sapiens OX=9606 GN=PSMD1 PE=1 SV=2	397.245	486.325	424.787	355.57	289.52	366.016
K4DI93;Q13620;Q13620-1;Q13620-3;A6NE76	7	1	36.1533	0.0521401	0.0189542	2.00787	0.54523	CM55	PM54	103383	Cullin 4B_ isoform CRA_e OS=Homo sapiens OX=9606 GN=CUL4B PE=1 SV=1	364.606	276.254	381.739	197.899	96.788	214.609
REVERSE8570	2	1	8.577	0.0522585	0.0189604	12.4528	0.5446	PM54	CM55	70614.3	Reversed Sequence 8570	22.4463	16.6158	0	166.756	175.148	144.53
Q96AC1;Q96AC1-3;H0YJ34;A0A0U1RRM8;Q96AC1-2;G3V281;G3V5R2;H0YJB6;G3V3J0	17	5	115.79	0.0522761	0.0189604	1.0597	0.544507	PM54	CM55	78488	Fermitin family homolog 2 OS=Homo sapiens OX=9606 GN=FERMT2 PE=1 SV=1	2339.19	2200.22	2216.08	2400.09	2344.27	2414.42
Q5T4D3;Q5T4D3-3;Q5T4D3-4	2	1	8.3129	0.0523474	0.0189604	5.48032	0.544128	PM54	CM55	83846.3	Transmembrane and TPR repeat-containing protein 4 OS=Homo sapiens OX=9606 GN=TMTC4 PE=2 SV=2	30.9378	4.30844	50.4926	185.582	112.042	172.252
O43683;O43683-3;O43683-2	6	1	23.1446	0.052351	0.0189604	1.39159	0.544109	PM54	CM55	123516	Mitotic checkpoint serine/threonine-protein kinase BUB1 OS=Homo sapiens OX=9606 GN=BUB1 PE=1 SV=1	221.984	243.02	160.478	284.801	289.266	296.346
Q16401;Q16401-2	2	1	10.3093	0.0527527	0.019076	4.33127	0.541988	PM54	CM55	56595	26S proteasome non-ATPase regulatory subunit 5 OS=Homo sapiens OX=9606 GN=PSMD5 PE=1 SV=3	122.502	11.3438	43.2896	250.461	262.645	254.118
Q92747;Q92747-2	5	1	25.7486	0.0527679	0.019076	2.77154	0.541908	PM54	CM55	42139.6	Actin-related protein 2/3 complex subunit 1A OS=Homo sapiens OX=9606 GN=ARPC1A PE=2 SV=2	156.732	52.927	215.254	429.89	401.947	345.826
REVERSE6280	13	1	53.3335	0.0528855	0.0191008	1.20471	0.54129	CM55	PM54	479975	Reversed Sequence 6280	569.189	686.844	698.177	548.657	525.994	547.488
REVERSE33070	2	1	8.2479	0.0532209	0.0192042	12.4782	0.539537	PM54	CM55	134929	Reversed Sequence 33070	10.266	0	36.2677	184.927	259.008	136.72
A0A0G2JS82;O94973;O94973-2;A0A0G2JQM1;O94973-3;A0A0G2JQA4;A0A0G2JQT9;A0A0G2JRF9;A0A0G2JS17;E9PQP4;E9PR62;H0YDE9;H0YEG0	5	1	25.7222	0.053468	0.0192756	1.24425	0.538252	CM55	PM54	102396	AP-2 complex subunit alpha-2 (Fragment) OS=Homo sapiens OX=9606 GN=AP2A2 PE=1 SV=1	396.686	329.981	351.708	268.874	273.249	324.562
O95347;O95347-2;A0A0C4DGE5	5	1	24.9567	0.0543165	0.0195634	1.3431	0.533888	PM54	CM55	136170	Structural maintenance of chromosomes protein 2 OS=Homo sapiens OX=9606 GN=SMC2 PE=1 SV=2	634.336	758.763	512.54	849.171	836.928	873.357
C9JQ42;G5E9W8;P46976;P46976-2;P46976-3;C9J7C7;C9J8R8	3	1	16.1944	0.0548125	0.0197239	1.14665	0.531371	CM55	PM54	30048.3	Glycogenin-1 (Fragment) OS=Homo sapiens OX=9606 GN=GYG1 PE=1 SV=8	2742.33	2508.05	2964.66	2367.09	2450.98	2346.31
P54920;M0R2M1;M0R0Y2;M0R058;M0R0I4;M0R027;M0R213	10	2	67.7744	0.0553741	0.0198928	1.28167	0.52855	PM54	CM55	33689	Alpha-soluble NSF attachment protein OS=Homo sapiens OX=9606 GN=NAPA PE=1 SV=3	309.016	241.449	226.183	329.473	340.869	325.064
Q16658;A0A0A0MSB2;C9JFC0;C9JPH9	18	11	109.449	0.0553837	0.0198928	1.18476	0.528502	CM55	PM54	55157.3	Fascin OS=Homo sapiens OX=9606 GN=FSCN1 PE=1 SV=3	4446.01	3825.31	3639.55	3291.58	3452.97	3308.85
Q99707;Q99707-2;B1ANE3	3	2	13.1871	0.0556248	0.0199541	1.24529	0.5273	PM54	CM55	141839	Methionine synthase OS=Homo sapiens OX=9606 GN=MTR PE=1 SV=2	829.119	854.325	913.642	965.881	1239.65	1028.6
Q9NQC7;Q9NQC7-2;H3BS09	4	1	12.1229	0.0556737	0.0199541	1.57891	0.527057	PM54	CM55	109084	Ubiquitin carboxyl-terminal hydrolase CYLD OS=Homo sapiens OX=9606 GN=CYLD PE=1 SV=1	53.1718	34.7736	53.8853	60.9879	78.1335	84.8172
H0YLU7;P13804;P13804-2;H0YK49;H0YKF0;H0YL12;H0YNX6	5	2	37.2185	0.0557076	0.0199541	1.34184	0.526889	PM54	CM55	32081.9	Electron transfer flavoprotein subunit alpha_ mitochondrial (Fragment) OS=Homo sapiens OX=9606 GN=ETFA PE=1 SV=1	361.797	404.882	472.684	641.662	525.473	495.893
A0A0A0MS69;Q14123;Q14123-3;Q14123-2	2	1	13.4378	0.055848	0.0199797	12.0772	0.526193	PM54	CM55	87210.5	Phosphodiesterase OS=Homo sapiens OX=9606 GN=PDE1C PE=1 SV=1	12.6233	37.0252	0	244.123	189.293	166.199
P11678	6	1	27.4759	0.0558811	0.0199797	4.11493	0.526029	PM54	CM55	82010.1	Eosinophil peroxidase OS=Homo sapiens OX=9606 GN=EPX PE=1 SV=2	15.5363	143.737	74.7361	314.073	312.558	336.304
Q9Y6X8;H0YKA3	5	1	23.1127	0.0562257	0.0200845	1.18247	0.52433	CM55	PM54	92991.5	Zinc fingers and homeoboxes protein 2 OS=Homo sapiens OX=9606 GN=ZHX2 PE=1 SV=1	3965.85	4528.16	3692.77	3536.07	3357.43	3412.7
P23526;P23526-2	6	4	30.5266	0.0565393	0.020178	1.19798	0.522793	PM54	CM55	48286.5	Adenosylhomocysteinase OS=Homo sapiens OX=9606 GN=AHCY PE=1 SV=4	620.89	720.423	673.976	853.547	837.32	723.41
B1ANB7;Q8TDD5	1	1	3.9011	0.0569559	0.0203082	1.07747	0.520766	PM54	CM55	37756.1	Mucolipin 3_ isoform CRA_d OS=Homo sapiens OX=9606 GN=MCOLN3 PE=1 SV=1	1760.51	1695.66	1623.17	1841.63	1862.72	1768.49
P49755;G3V2K7	4	2	31.6034	0.0573834	0.020442	1.09496	0.518702	CM55	PM54	25147.1	Transmembrane emp24 domain-containing protein 10 OS=Homo sapiens OX=9606 GN=TMED10 PE=1 SV=2	3243.05	3354.1	3446.12	3182.85	2883.25	3106.18
REVERSE24026	7	1	28.1909	0.0575128	0.0204514	11.951	0.518081	PM54	CM55	107805	Reversed Sequence 24026	0	14.4247	22.0773	98.2034	218.772	119.257
Q8IX03	4	1	15.0814	0.0575145	0.0204514	4.25204	0.518073	PM54	CM55	126099	Protein KIBRA OS=Homo sapiens OX=9606 GN=WWC1 PE=1 SV=1	30.6375	60.2506	7.1623	136.621	94.8856	185.407
O00411	4	1	18.3201	0.0578486	0.0205515	1.19574	0.516476	CM55	PM54	140388	DNA-directed RNA polymerase_ mitochondrial OS=Homo sapiens OX=9606 GN=POLRMT PE=1 SV=2	430.943	434.841	485.754	398.554	335.4	396.34
A0A087WTW5;Q9UKL3;A0A096LP21	6	1	24.874	0.0585553	0.0207837	1.81867	0.51313	CM55	PM54	223640	CASP8-associated protein 2 OS=Homo sapiens OX=9606 GN=CASP8AP2 PE=1 SV=1	330.207	356.029	603.158	240.366	277.09	191.52
Q6ZTR5;Q6ZTR5-6	8	1	35.3067	0.0591388	0.0209717	1.14634	0.510401	CM55	PM54	365503	Cilia- and flagella-associated protein 47 OS=Homo sapiens OX=9606 GN=CFAP47 PE=2 SV=5	995.186	1046.15	997.293	879.398	808.344	962.989
P28799;P28799-3;K7EKL3;K7EQ05;P28799-2;K7EQI0	3	1	16.907	0.0593205	0.0210171	5.2448	0.509557	CM55	PM54	68562.9	Granulins OS=Homo sapiens OX=9606 GN=GRN PE=1 SV=2	120.804	642.203	519.797	88.0318	104.672	51.8816
P11216;H0Y4Z6	10	1	52.5795	0.0594593	0.0210472	1.71834	0.508914	PM54	CM55	97380.5	Glycogen phosphorylase_ brain form OS=Homo sapiens OX=9606 GN=PYGB PE=1 SV=5	204.414	410.277	263.772	495.081	432.565	581.857
Q8WZ64	4	1	19.6529	0.060075	0.0212459	4.47366	0.506083	CM55	PM54	195220	Arf-GAP with Rho-GAP domain_ ANK repeat and PH domain-containing protein 2 OS=Homo sapiens OX=9606 GN=ARAP2 PE=1 SV=3	505.646	1464.2	1872.4	477.906	271.133	109.82
Q13535;Q13535-2;Q13535-3;D6RIG7;H0Y9K2	18	1	86.7644	0.0602811	0.0212915	1.14328	0.505143	PM54	CM55	304960	Serine/threonine-protein kinase ATR OS=Homo sapiens OX=9606 GN=ATR PE=1 SV=3	3868.32	3948.82	3357.21	4248.01	4354.72	4172.64
REVERSE19681	1	1	4.8062	0.0603271	0.0212915	2.78598	0.504933	PM54	CM55	358116	Reversed Sequence 19681	95.6951	48.1345	37.452	181.309	90.6017	233.135
REVERSE21387	2	1	7.9299	0.0603674	0.0212915	1.4661	0.50475	PM54	CM55	112771	Reversed Sequence 21387	264.042	278.513	399.961	396.811	518.734	466.272
A0A2R8Y492	2	1	9.1693	0.0605138	0.0213239	4.42678	0.504085	PM54	CM55	45546.3	Serine/threonine-protein kinase B-raf (Fragment) OS=Homo sapiens OX=9606 GN=BRAF PE=1 SV=1	31.4812	256.454	279.108	792.423	827.839	889.912
REVERSE42805	3	1	11.0306	0.0606243	0.0213292	2.10104	0.503584	PM54	CM55	159885	Reversed Sequence 42805	82.4603	223.312	111.354	349.451	235.36	291.587
REVERSE21869	2	1	8.7491	0.0606392	0.0213292	3.41815	0.503517	CM55	PM54	73965.8	Reversed Sequence 21869	141.346	114.916	39.9734	20.4544	25.6929	40.518
P53621;P53621-2	11	5	55.37	0.0606926	0.0213292	1.34527	0.503276	PM54	CM55	139886	Coatomer subunit alpha OS=Homo sapiens OX=9606 GN=COPA PE=1 SV=2	567.084	655.285	442.695	719.813	796.073	724.072
Q7Z7A1;Q7Z7A1-5;Q7Z7A1-2;Q7Z7A1-3;Q7Z7A1-4;Q5JVD6;Q5JVD1;Q5JVD5;Q5JVD3	27	2	145.204	0.0609425	0.0213978	1.10093	0.502148	CM55	PM54	270027	Centriolin OS=Homo sapiens OX=9606 GN=CNTRL PE=1 SV=2	7245.8	6840.77	7068.47	6360.19	6800.07	6055.42
Q13439;Q13439-3;Q13439-4;Q13439-5;H0Y6I0;Q86W71;C9JHJ5	19	2	87.2755	0.0613256	0.0215129	1.54021	0.500431	PM54	CM55	262053	Golgin subfamily A member 4 OS=Homo sapiens OX=9606 GN=GOLGA4 PE=1 SV=1	65.5637	70.5801	90.5587	88.0097	134.621	126.539
Q9UQ26;Q9UQ26-8;A0A0J9YWD4;D6RA03;F8W6W8;Q9UQ26-1;Q9UQ26-3;Q9UQ26-2;Q9UQ26-5	4	1	17.3756	0.0614141	0.0215247	1.19312	0.500035	PM54	CM55	161316	Regulating synaptic membrane exocytosis protein 2 OS=Homo sapiens OX=9606 GN=RIMS2 PE=1 SV=2	575.735	680.987	687.259	792.653	810.943	715.804
P23760;P23760-4;P23760-5;P23760-6;P23760-7;P23760-8	1	1	3.8346	0.0615157	0.0215409	5.63353	0.499583	PM54	CM55	53366.8	Paired box protein Pax-3 OS=Homo sapiens OX=9606 GN=PAX3 PE=1 SV=2	47.3905	3.61507	41.1102	166.216	221.154	131.568
REVERSE5560	4	1	21.5549	0.0617503	0.0216037	3.97176	0.49854	PM54	CM55	140499	Reversed Sequence 5560	44.1999	22.7292	288.408	506.827	452.274	452.213
P08151;P08151-2;P08151-3	3	1	13.829	0.0621373	0.0217197	7.01645	0.49683	PM54	CM55	119672	Zinc finger protein GLI1 OS=Homo sapiens OX=9606 GN=GLI1 PE=1 SV=1	25.3118	0	3.63455	67.2596	80.1328	55.7082
E9PS97;J3KNQ4;Q9NVD7;Q9NVD7-2	5	4	29.3642	0.0623006	0.0217573	1.1546	0.496112	CM55	PM54	23734.3	Alpha-parvin (Fragment) OS=Homo sapiens OX=9606 GN=PARVA PE=1 SV=1	711.344	649.187	627.026	572.133	533.217	616.069
P47914	3	1	18.2382	0.0628679	0.0219229	1.09765	0.493634	PM54	CM55	17809.1	60S ribosomal protein L29 OS=Homo sapiens OX=9606 GN=RPL29 PE=1 SV=2	1120.26	1200.26	1062.64	1264.64	1221.75	1227.14
REVERSE16710	2	1	8.6516	0.0628868	0.0219229	2.95691	0.493552	PM54	CM55	114107	Reversed Sequence 16710	26.9325	14.1044	62.0117	65.1833	134.123	105.399
Q13085;Q13085-2;Q13085-3;Q13085-4;Q59FY4;A0A087WWN5	10	2	52.578	0.0643097	0.0223989	2.55646	0.487448	PM54	CM55	267265	Acetyl-CoA carboxylase 1 OS=Homo sapiens OX=9606 GN=ACACA PE=1 SV=2	62.2119	20.346	64.0127	97.9366	164.744	112.021
Q9BW60;Q9BW60-2	2	1	10.5912	0.0650583	0.0226395	6.42689	0.484298	PM54	CM55	32776.9	Elongation of very long chain fatty acids protein 1 OS=Homo sapiens OX=9606 GN=ELOVL1 PE=1 SV=1	72.7411	7.51881	275.837	672.999	767.528	848.069
Q6P0N0;G5E9K5;Q6P0N0-2;H7C1S6	6	2	34.2443	0.0652385	0.022682	1.39741	0.483545	CM55	PM54	129998	Mis18-binding protein 1 OS=Homo sapiens OX=9606 GN=MIS18BP1 PE=1 SV=1	284.382	210.517	228.117	164.808	205.589	147
REVERSE19677	4	2	16.9142	0.0653212	0.0226905	1.28739	0.483201	CM55	PM54	95314.1	Reversed Sequence 19677	531.613	628.8	673.798	415.048	531.12	478.589
Q63HK5	6	1	43.0911	0.065871	0.0228612	1.31035	0.480924	PM54	CM55	119593	Teashirt homolog 3 OS=Homo sapiens OX=9606 GN=TSHZ3 PE=1 SV=2	162.78	198.052	183.338	203.579	232.647	276.828
Q13619;A0A0A0MR50;Q13619-2;A0A087WWN2	11	1	46.3861	0.0659594	0.0228715	1.29764	0.48056	CM55	PM54	88193.7	Cullin-4A OS=Homo sapiens OX=9606 GN=CUL4A PE=1 SV=3	528.158	735.743	656.265	472.022	514.122	493.589
REVERSE30754	8	1	32.4087	0.0662043	0.0229361	1.74995	0.479554	CM55	PM54	309720	Reversed Sequence 30754	215.829	238.991	230.756	148.392	76.5777	166.8
O43294;O43294-2	4	2	14.1892	0.066693	0.023085	1.31516	0.47756	CM55	PM54	51354	Transforming growth factor beta-1-induced transcript 1 protein OS=Homo sapiens OX=9606 GN=TGFB1I1 PE=1 SV=2	254.555	279.532	197.581	192.448	179.921	183.965
Q9P1Z9;Q9P1Z9-3	7	1	32.2248	0.067442	0.0233236	1.14614	0.474536	CM55	PM54	198941	Coiled-coil domain-containing protein 180 OS=Homo sapiens OX=9606 GN=CCDC180 PE=2 SV=3	1189.99	1047.54	1073.7	988.093	1009.45	891.507
O75368	4	1	27.1513	0.0679332	0.0234727	2.37265	0.472573	CM55	PM54	12774.3	SH3 domain-binding glutamic acid-rich-like protein OS=Homo sapiens OX=9606 GN=SH3BGRL PE=1 SV=1	120.961	70.249	144.422	66.2216	50.1555	25.0817
REVERSE19464	3	1	16.1141	0.0685633	0.0236695	2.37147	0.47008	CM55	PM54	190802	Reversed Sequence 19464	118.977	220.91	167.305	88.3531	91.8927	33.6263
P55072;C9IZA5;C9JUP7	38	26	235.861	0.0686707	0.0236856	1.10209	0.469658	CM55	PM54	90006.3	Transitional endoplasmic reticulum ATPase OS=Homo sapiens OX=9606 GN=VCP PE=1 SV=4	6633.75	6471.01	6201.58	6124.73	5458.12	5935.04
P10586;P10586-2;H0Y380;H0Y4H1;H0Y6Z7;H0Y7Z9	9	2	33.8318	0.0688787	0.0237364	1.94932	0.468842	PM54	CM55	214077	Receptor-type tyrosine-protein phosphatase F OS=Homo sapiens OX=9606 GN=PTPRF PE=1 SV=2	66.2614	95.5702	97.6715	111.382	240.355	154.117
P63172	2	2	11.5623	0.0689882	0.0237532	2.25853	0.468413	PM54	CM55	12680.2	Dynein light chain Tctex-type 1 OS=Homo sapiens OX=9606 GN=DYNLT1 PE=1 SV=1	70.0847	220.398	215.208	380.182	363.439	398.498
P19338;H7BY16	20	11	104.527	0.0692566	0.0238246	1.11838	0.467367	CM55	PM54	76671.5	Nucleolin OS=Homo sapiens OX=9606 GN=NCL PE=1 SV=3	1524.34	1504.91	1502.9	1231.64	1431.95	1388.83
REVERSE30815	3	1	12.7397	0.0694524	0.0238709	1.68726	0.466607	CM55	PM54	89942.1	Reversed Sequence 30815	187.026	170.752	307.438	151.423	129.535	113.302
Q9C0B2;A0A2R8YEX1;Q9C0B2-2;Q9C0B2-3;Q5T2D8	13	3	67.8364	0.069854	0.0239879	1.33279	0.465054	PM54	CM55	179958	Cilia- and flagella-associated protein 74 OS=Homo sapiens OX=9606 GN=CFAP74 PE=2 SV=3	331.47	233.581	337.175	387.675	420.729	394.077
P50914;E7EPB3	9	7	29.4185	0.0700659	0.0240395	1.07582	0.46424	PM54	CM55	23545.9	60S ribosomal protein L14 OS=Homo sapiens OX=9606 GN=RPL14 PE=1 SV=4	2483.88	2564.62	2400.22	2790.97	2589.25	2633.24
Q3ZCM7;A0A075B736;Q5SQY0	19	3	148.788	0.0704459	0.024133	1.06247	0.462786	PM54	CM55	50289.4	Tubulin beta-8 chain OS=Homo sapiens OX=9606 GN=TUBB8 PE=1 SV=2	1695.71	1662.85	1684.82	1713.16	1784.71	1860.57
Q9H4B7	7	1	64.1256	0.070462	0.024133	1.29707	0.462725	CM55	PM54	50897.3	Tubulin beta-1 chain OS=Homo sapiens OX=9606 GN=TUBB1 PE=1 SV=1	797.669	620.017	655.264	582.256	557.195	458.73
REVERSE4092	2	1	9.0647	0.0708254	0.0242363	2.95106	0.461343	PM54	CM55	46934	Reversed Sequence 4092	45.8368	18.3974	42.585	134.864	50.2151	130.15
A3KN83;A3KN83-2;A3KN83-3	1	1	4.1606	0.0714436	0.0244264	5.38735	0.459012	PM54	CM55	154997	Protein strawberry notch homolog 1 OS=Homo sapiens OX=9606 GN=SBNO1 PE=1 SV=1	98.8936	5.44875	67.1686	312.119	355.237	256.633
REVERSE22330	6	1	24.4634	0.0716158	0.0244639	1.69824	0.458367	CM55	PM54	93986.2	Reversed Sequence 22330	182.689	118.039	221.222	104.043	117.581	85.7243
A0A0A0MRJ0;Q5VT25;Q5VT25-2;Q5VT25-3;Q5VT25-4;Q5VT25-5;Q5VT25-6	2	1	9.1674	0.0718865	0.0245349	1.3066	0.457357	CM55	PM54	195745	Non-specific serine/threonine protein kinase OS=Homo sapiens OX=9606 GN=CDC42BPA PE=1 SV=1	396.406	332.325	283.035	238.528	257.686	278.136
M0QZW4;M0R248;Q13011	3	1	15.8934	0.0719705	0.0245422	1.37039	0.457044	PM54	CM55	20016.9	Delta(3_5)-Delta(2_4)-dienoyl-CoA isomerase_ mitochondrial (Fragment) OS=Homo sapiens OX=9606 GN=ECH1 PE=1 SV=1	101.932	92.2084	138.749	142.391	144.569	169.228
Q5VTT5;Q5VTT5-2;Q5VTT5-3	7	1	28.7638	0.0721095	0.0245681	4.6404	0.456528	PM54	CM55	163330	Myomesin-3 OS=Homo sapiens OX=9606 GN=MYOM3 PE=1 SV=1	7.15502	44.4266	121.989	264.165	340.892	200.379
H3BV03;Q68CZ1	5	1	19.7002	0.0722728	0.0245831	1.1947	0.455923	CM55	PM54	148187	Protein fantom OS=Homo sapiens OX=9606 GN=RPGRIP1L PE=1 SV=1	957.511	885.25	1023.48	872.89	816.777	709.452
REVERSE30415	6	1	33.0882	0.0722793	0.0245831	1.41127	0.455899	PM54	CM55	184272	Reversed Sequence 30415	216.938	256.891	173.149	289.229	266.293	357.539
Q99497;K7ELW0;K7EN27	7	5	49.3967	0.0730029	0.0248076	1.22106	0.453237	CM55	PM54	20062.2	Protein/nucleic acid deglycase DJ-1 OS=Homo sapiens OX=9606 GN=PARK7 PE=1 SV=2	2663.17	2243.52	2854.74	1962.29	2221.23	2172.82
O43491;A0A2R8Y5B3;E9PHY5;E9PII3;E9PK52;O43491-2;O43491-3;O43491-4;E9PIG0;E9PJP4;E9PQD2;E9PQN0;E9PRG1	7	1	41.9926	0.0737457	0.0250383	3.50047	0.450537	PM54	CM55	113101	Band 4.1-like protein 2 OS=Homo sapiens OX=9606 GN=EPB41L2 PE=1 SV=1	42.8929	17.3119	210.343	335.09	275.383	336.571
P11532;A0A075B6G3;A0A087WTU7;A0A087WV90;E9PDN5;P11532-4;P11532-2;P11532-3;Q4G0X0;H0Y304;E7EQS5;E7ESB2;F8VX32;F5GZY3;E7EQR9;P11532-10;P11532-5;P11532-6;P11532-7;P11532-8;P11532-9	41	7	182.084	0.0739174	0.0250748	1.09082	0.449917	CM55	PM54	428803	Dystrophin OS=Homo sapiens OX=9606 GN=DMD PE=1 SV=3	1788.68	1674.08	1806.46	1530.64	1680.91	1618.94
REVERSE1274	7	1	32.0257	0.0740593	0.0251011	1.97996	0.449407	PM54	CM55	70799.6	Reversed Sequence 1274	71.3402	34.5957	80.5971	97.1578	159	113.17
Q9BZF1;Q9BZF1-2;Q9BZF1-3	3	1	12.0349	0.0744773	0.0252209	1.40711	0.447909	CM55	PM54	101823	Oxysterol-binding protein-related protein 8 OS=Homo sapiens OX=9606 GN=OSBPL8 PE=1 SV=3	223.764	200.54	150.138	143.091	117.549	147.603
Q86TC9;A0A087WX60;Q86TC9-2;Q86TC9-3	5	1	27.8204	0.0745785	0.0252333	3.00136	0.447548	PM54	CM55	146797	Myopalladin OS=Homo sapiens OX=9606 GN=MYPN PE=1 SV=2	12.2667	78.7051	49.7087	159.561	126.74	135.931
P29966	5	4	24.6765	0.0751716	0.025412	1.42621	0.445443	CM55	PM54	31725.8	Myristoylated alanine-rich C-kinase substrate OS=Homo sapiens OX=9606 GN=MARCKS PE=1 SV=4	1768.41	1164.8	1782.24	1120.19	1089.99	1096.09
Q9NZM3;Q9NZM3-2;A0A087WVF7;Q9NZM3-4;E7EPJ2;F8W719;H7C3E2	13	1	59.9547	0.0752683	0.0254227	1.39074	0.445102	PM54	CM55	194545	Intersectin-2 OS=Homo sapiens OX=9606 GN=ITSN2 PE=1 SV=3	232.288	184.844	272.95	322.17	364.322	273.233
Q96RL7;Q96RL7-2;Q96RL7-3;Q96RL7-4	8	1	36.9969	0.0755467	0.0254947	4.84376	0.444122	CM55	PM54	362102	Vacuolar protein sorting-associated protein 13A OS=Homo sapiens OX=9606 GN=VPS13A PE=1 SV=2	129.092	127.927	109.766	31.8781	41.2469	2.59807
REVERSE20002	5	1	21.5955	0.0758773	0.0255842	7.42032	0.442964	PM54	CM55	124370	Reversed Sequence 20002	0	8.63759	37.6964	98.3728	138.576	106.865
Q96QK1	7	2	37.5794	0.0759924	0.0256009	1.16215	0.442563	CM55	PM54	92505.6	Vacuolar protein sorting-associated protein 35 OS=Homo sapiens OX=9606 GN=VPS35 PE=1 SV=2	1008.17	895.91	815.537	773.761	787.698	778.703
O95361;B3KP96;K7ENN8;O95361-2	2	1	8.3691	0.0762733	0.0256584	2.07392	0.441586	PM54	CM55	64924.7	Tripartite motif-containing protein 16 OS=Homo sapiens OX=9606 GN=TRIM16 PE=1 SV=3	67.8624	206.495	79.8382	220.672	224.816	289.083
A0A2R8Y4H4;Q6ZRR7;Q6ZRR7-2;H3BUS4	5	3	22.3341	0.0763222	0.0256584	1.32423	0.441416	PM54	CM55	173352	Leucine-rich repeat-containing protein 9 OS=Homo sapiens OX=9606 GN=LRRC9 PE=1 SV=1	297.141	386.781	446.229	466.518	514.245	515.82
REVERSE22675	1	1	3.7787	0.07636	0.0256584	4.11004	0.441285	PM54	CM55	84558.9	Reversed Sequence 22675	135.878	104.816	12.0229	338.354	324.65	375.671
D6RHZ6;P00325;P00325-2;V9HW50	2	1	8.9583	0.076455	0.0256682	1.4571	0.440956	PM54	CM55	36191.6	Alcohol dehydrogenase 1B OS=Homo sapiens OX=9606 GN=ADH1B PE=1 SV=2	80.8789	133.153	128.77	160.288	156.607	182.601
O76094;O76094-2	1	1	4.694	0.0767582	0.0257479	7.66929	0.439909	PM54	CM55	75176.6	Signal recognition particle subunit SRP72 OS=Homo sapiens OX=9606 GN=SRP72 PE=1 SV=3	0	0	21.9323	15.6633	77.903	74.6392
O95782;O95782-2	12	1	60.4427	0.0773384	0.0259164	1.23348	0.437919	PM54	CM55	108630	AP-2 complex subunit alpha-1 OS=Homo sapiens OX=9606 GN=AP2A1 PE=1 SV=3	1326.53	1224.73	1327.21	1424.46	1860.83	1498.74
Q9Y4A5;F2Z2U4;Q9Y4A5-2;H0Y4W2;A0A2R8YFJ4	17	1	84.5077	0.0773933	0.0259164	8.03701	0.437732	PM54	CM55	442049	Transformation/transcription domain-associated protein OS=Homo sapiens OX=9606 GN=TRRAP PE=1 SV=3	8.45676	25.1075	0	132.049	46.0341	91.6733
REVERSE39846	11	1	53.7454	0.0775467	0.0259456	1.12203	0.43721	PM54	CM55	436224	Reversed Sequence 39846	558.955	639.577	544.749	653.613	653.545	648.854
Q8WUD1;Q8WUD1-2	4	1	25.7023	0.0779727	0.0260253	1.08949	0.435765	PM54	CM55	24442.5	Ras-related protein Rab-2B OS=Homo sapiens OX=9606 GN=RAB2B PE=1 SV=1	373.99	358.618	375.725	382.522	397.253	427.746
O60565;O60565-2;Q9H772	1	1	6.4848	0.0779828	0.0260253	1.34064	0.435731	CM55	PM54	21210	Gremlin-1 OS=Homo sapiens OX=9606 GN=GREM1 PE=1 SV=1	1770.14	1629.58	1365.54	963.07	1334.05	1257.34
H0Y3Y9;P55036;Q5VWC4	1	1	6.0426	0.0779847	0.0260253	1.5098	0.435725	CM55	PM54	21007.1	26S proteasome non-ATPase regulatory subunit 4 (Fragment) OS=Homo sapiens OX=9606 GN=PSMD4 PE=1 SV=1	258.036	202.801	315.431	142.79	159.095	212.267
Q6AWC2;Q6AWC2-4;Q6AWC2-6;Q6AWC2-5;F8WET3	3	1	14.0905	0.0788946	0.0263065	3.14622	0.432671	PM54	CM55	134918	Protein WWC2 OS=Homo sapiens OX=9606 GN=WWC2 PE=1 SV=2	292.912	51.7703	329.767	607.927	775.331	738.71
P60709;P63261;A0A2R8Y793;I3L1U9;I3L3I0;I3L4N8;A0A2R8YGF8;E7EVS6;G5E9R0;C9JUM1;C9JZR7;I3L3R2;J3KT65;K7EM38;A0A2R8YEA7;A0A2R8YFE2;C9JTX5;B8ZZJ2;F8WB63;Q9BYX7;F8WCH0	100	44	548.992	0.0791505	0.0263693	1.11562	0.43182	CM55	PM54	42079	Actin_ cytoplasmic 1 OS=Homo sapiens OX=9606 GN=ACTB PE=1 SV=1	146103	149050	159369	132343	128708	146364
REVERSE14391	3	1	12.501	0.0792759	0.0263886	1.21727	0.431404	CM55	PM54	73551.4	Reversed Sequence 14391	1667.85	1295.46	1553.61	1177.19	1315.22	1218.28
REVERSE13195	1	1	8.7898	0.079375	0.0263991	1.1386	0.431076	PM54	CM55	56250.1	Reversed Sequence 13195	503.154	437.097	507.079	530.536	580.954	536.444
A0A2R8Y549;Q8NI35;A0A087WUZ6;A0A0U1RR46;A0A0X1KG69;Q8NI35-2;Q8NI35-3;Q8NI35-4	3	1	11.442	0.0798009	0.0265182	1.24827	0.429672	CM55	PM54	205496	InaD-like protein OS=Homo sapiens OX=9606 GN=PATJ PE=1 SV=1	503.232	575.674	429.647	376.276	428.526	403.709
Q8IVF6;A2A2Z9	7	1	30.678	0.0806237	0.0267688	1.33048	0.426985	CM55	PM54	116624	Ankyrin repeat domain-containing protein 18A OS=Homo sapiens OX=9606 GN=ANKRD18A PE=2 SV=3	553.204	555	776.453	459.108	505.118	452.3
REVERSE37986	4	1	21.3608	0.0807358	0.0267833	2.74831	0.426622	PM54	CM55	83400.2	Reversed Sequence 37986	59.1476	9.00437	19.5257	66.4644	95.3948	79.1064
O75947;O75947-2	1	1	5.9002	0.081419	0.026987	7.70287	0.42442	PM54	CM55	18548.3	ATP synthase subunit d_ mitochondrial OS=Homo sapiens OX=9606 GN=ATP5H PE=1 SV=3	20.4441	16.0095	0	86.0835	126.129	68.5853
P28074;P28074-3;H0YJM8;P28074-2	5	2	34.6828	0.0815228	0.0269985	1.04672	0.424087	PM54	CM55	28651.4	Proteasome subunit beta type-5 OS=Homo sapiens OX=9606 GN=PSMB5 PE=1 SV=3	438.039	448.86	451.162	451.484	470.284	478.804
P62328	2	1	14.7091	0.0819645	0.0271081	1.09094	0.422677	PM54	CM55	5052.67	Thymosin beta-4 OS=Homo sapiens OX=9606 GN=TMSB4X PE=1 SV=2	4134.02	4175.78	3798.01	4313.38	4288.8	4606.72
P04216;E9PIM6;E9PNQ8;J3QRJ3	9	8	23.7528	0.0819925	0.0271081	1.04483	0.422588	PM54	CM55	18162.9	Thy-1 membrane glycoprotein OS=Homo sapiens OX=9606 GN=THY1 PE=1 SV=2	5793.3	5763	6010.93	5964.03	6247.85	6142.92
P37837;F2Z393	10	6	52.6374	0.0824561	0.0272384	1.06494	0.421119	PM54	CM55	37711.3	Transaldolase OS=Homo sapiens OX=9606 GN=TALDO1 PE=1 SV=2	2248.64	2174.28	2101.79	2357.25	2228.53	2362.64
O00231;O00231-2;J3QRY4	9	2	49.2445	0.0830406	0.0273997	1.24235	0.419282	CM55	PM54	47749	26S proteasome non-ATPase regulatory subunit 11 OS=Homo sapiens OX=9606 GN=PSMD11 PE=1 SV=3	260.047	222.237	300.136	203.866	222.292	203.632
A0A2R8YD50;E7EWE5;P51659;P51659-2;P51659-3;A0A2R8Y7L2;E7ET17;G5E9S2;E7ER27;A0A2R8YDT8;A0A2R8YF45;A0A2R8Y7W2	10	1	62.4795	0.0830849	0.0273997	4.94124	0.419144	PM54	CM55	77294.2	Peroxisomal multifunctional enzyme type 2 OS=Homo sapiens OX=9606 GN=HSD17B4 PE=1 SV=1	57.6431	0	0	89.5647	117.97	77.2939
Q8TAT5	1	1	4.5297	0.0831879	0.0274106	2.98605	0.418821	CM55	PM54	69308.9	Endonuclease 8-like 3 OS=Homo sapiens OX=9606 GN=NEIL3 PE=1 SV=3	205.116	190.969	120.381	65.4355	91.9189	15.6053
Q12830;A0A2R8Y7Q1;E7ETD6;E9PE19;Q12830-4;F5GXF5;Q12830-2;A0A0A0MR81;J3QQK4	14	1	74.2896	0.0833566	0.027443	4.06232	0.418295	PM54	CM55	341000	Nucleosome-remodeling factor subunit BPTF OS=Homo sapiens OX=9606 GN=BPTF PE=1 SV=3	53.6661	94.9075	6.98401	179.551	184.697	267.675
A0A088AWL3;O75376;O75376-2;E7EVU5;E7EW50;J3KS51;O75376-3	2	1	8.6519	0.0836977	0.0275321	3.6766	0.417235	CM55	PM54	259900	Nuclear receptor corepressor 1 OS=Homo sapiens OX=9606 GN=NCOR1 PE=1 SV=1	92.5204	125.873	124.232	53.9672	34.2445	4.97895
REVERSE11824	4	1	15.1666	0.0838856	0.0275707	1.20173	0.416654	CM55	PM54	248862	Reversed Sequence 11824	1248.67	1089.92	1425.91	1049.54	1037.93	1045.1
E7EU13;Q96P48;Q96P48-1;Q96P48-2;Q96P48-3;Q96P48-4;Q96P48-7;A0A0A0MSJ2;Q96P48-5	3	1	14.4836	0.084369	0.0277063	1.38872	0.415165	CM55	PM54	136063	Arf-GAP with Rho-GAP domain_ ANK repeat and PH domain-containing protein 1 OS=Homo sapiens OX=9606 GN=ARAP1 PE=1 SV=1	334.425	270.94	392.637	283.374	205.809	229.464
B5MD38;P55084;P55084-2;F5GZQ3;C9JE81;C9JEY0;C9K0M0	7	3	42.4155	0.0845822	0.027753	1.09734	0.414511	CM55	PM54	38152.2	Trifunctional enzyme subunit beta_ mitochondrial OS=Homo sapiens OX=9606 GN=HADHB PE=1 SV=1	837.67	750.992	748.508	690.765	729.59	709.5
REVERSE22416	1	1	4.2926	0.0853128	0.0279693	1.57868	0.412288	PM54	CM55	110000	Reversed Sequence 22416	183.434	330.935	300.633	372.052	519.643	394.931
P78371;F5GWF6;F8VQ14;P78371-2	10	5	60.0898	0.0861042	0.0282051	1.24213	0.409906	PM54	CM55	57830.5	T-complex protein 1 subunit beta OS=Homo sapiens OX=9606 GN=CCT2 PE=1 SV=4	752.158	906.06	1060.11	1099.13	1132.6	1144.79
F5H269;Q9Y485	10	1	46.9189	0.0866169	0.0283492	8.20797	0.408377	PM54	CM55	344066	DmX-like protein 1 OS=Homo sapiens OX=9606 GN=DMXL1 PE=1 SV=1	12.3757	24.5274	0	56.8186	173.376	72.7049
Q9Y617;Q9Y617-2	3	1	14.8122	0.0870969	0.0284825	1.49445	0.406956	PM54	CM55	40821.9	Phosphoserine aminotransferase OS=Homo sapiens OX=9606 GN=PSAT1 PE=1 SV=2	183.18	307.794	320.288	363.761	400.085	448.546
P35613;P35613-2;A0A087WUV8;A0A087X2B5;P35613-3;P35613-4;I3L192;R4GMX5;R4GN83;A0A2R8YDZ0	8	4	44.5214	0.0872116	0.0284961	1.04831	0.406618	CM55	PM54	42599.6	Basigin OS=Homo sapiens OX=9606 GN=BSG PE=1 SV=2	1380.63	1364.44	1411.77	1339.34	1273.83	1352.12
P51911;B7Z7E1;P51911-2;K7EQ72;K7ER02;K7ENC5	4	3	25.3213	0.0886464	0.0289309	1.52252	0.402435	PM54	CM55	33341.6	Calponin-1 OS=Homo sapiens OX=9606 GN=CNN1 PE=1 SV=2	294.095	148.006	244.977	350.303	351.284	344.506
A0A0G2JM16;A0A0G2JNM3;A0A0G2JPA4;E9PDY6;Q99102;A0A0G2JMX1;A0A0G2JNL3;A0A0G2JQT8;A0A0G2JRA1;E7ENC5;Q99102-10;A0A0G2JN54;A0A0G2JNJ5;A0A0G2JQC1;A0A0G2JRT1;A0A0G2JRU8;A0A0G2JSC3;E7EWN1;Q99102-12;Q99102-13;Q99102-17;Q99102-3;A0A0G2JQC6;A0A0G2JQJ2;A0A0G2JSB1	5	1	21.9344	0.0886904	0.0289309	1.24782	0.402308	PM54	CM55	533690	Mucin-4 OS=Homo sapiens OX=9606 GN=MUC4 PE=1 SV=1	203.479	165.295	150.221	219.063	196.878	231.669
Q02952;Q02952-2;Q02952-3	16	2	73.8685	0.0888926	0.0289727	1.30663	0.401725	PM54	CM55	192052	A-kinase anchor protein 12 OS=Homo sapiens OX=9606 GN=AKAP12 PE=1 SV=4	303.725	318.497	440.357	489.237	423.038	476.126
Q14847;C9J9W2;Q14847-2;Q14847-3;F6S2S5	5	4	37.5225	0.0895579	0.0291652	1.10295	0.399821	CM55	PM54	30116.4	LIM and SH3 domain protein 1 OS=Homo sapiens OX=9606 GN=LASP1 PE=1 SV=2	3056.67	2951.74	2819.97	2720.58	2476.45	2807.31
P35749;P35749-2;P35749-3;P35749-4	41	4	301.086	0.0900461	0.0292998	1.0156	0.398435	CM55	PM54	228195	Myosin-11 OS=Homo sapiens OX=9606 GN=MYH11 PE=1 SV=3	2984.8	2972.85	2927.79	2928.84	2894.85	2925.28
REVERSE21053	2	1	9.2913	0.09017	0.0293157	2.72917	0.398085	PM54	CM55	60045	Reversed Sequence 21053	205.338	294.244	47.5759	432.831	524.862	535.597
Q9NQC3;Q9NQC3-4;Q9NQC3-2;Q9NQC3-5;Q9NQC3-6;F8W914;H7C106;Q9NQC3-3;A0A0U1RQR6	12	8	74.9438	0.0903274	0.0293425	1.01466	0.397641	CM55	PM54	130331	Reticulon-4 OS=Homo sapiens OX=9606 GN=RTN4 PE=1 SV=2	13582.5	13335.9	13396.7	13328.6	13167.5	13236.6
P43307;C9IZQ1;C9J3L8;C9J5W0;E9PAL7;P43307-2	3	3	12.8206	0.0905678	0.0293873	1.13162	0.396964	CM55	PM54	32235.4	Translocon-associated protein subunit alpha OS=Homo sapiens OX=9606 GN=SSR1 PE=1 SV=3	730.174	724.74	661.723	665.851	569.245	635.347
B7ZLU9;Q14833;Q14833-3;Q14833-4	1	1	4.8005	0.0906159	0.0293873	1.76556	0.396829	CM55	PM54	97508.2	Metabotropic glutamate receptor 4 OS=Homo sapiens OX=9606 GN=GRM4 PE=1 SV=1	59.6988	36.33	61.2657	19.4316	36.9216	32.7373
Q9C0G0	3	1	8.4152	0.0907489	0.0294061	1.86554	0.396456	PM54	CM55	251816	Zinc finger protein 407 OS=Homo sapiens OX=9606 GN=ZNF407 PE=1 SV=2	103.544	84.5614	46.9629	120.507	198.889	119.133
Q6ZU80;Q6ZU80-1;H0YJE3;Q6ZU80-3;H0YIZ9	9	2	47.0504	0.0933903	0.0302369	1.18182	0.389188	CM55	PM54	128643	Centrosomal protein of 128 kDa OS=Homo sapiens OX=9606 GN=CEP128 PE=1 SV=2	580.057	685.37	732.67	551.516	593.591	545.589
P24752;P24752-2;E9PRQ6;H0YEL7;E9PKF3	3	1	17.2565	0.0934786	0.0302405	1.97431	0.38895	PM54	CM55	45484.8	Acetyl-CoA acetyltransferase_ mitochondrial OS=Homo sapiens OX=9606 GN=ACAT1 PE=1 SV=1	143.933	81.0214	260.431	257.214	378.588	322.501
P38117;P38117-2;M0QY67	4	1	22.1062	0.0937345	0.0302981	7.08971	0.38826	PM54	CM55	28071.8	Electron transfer flavoprotein subunit beta OS=Homo sapiens OX=9606 GN=ETFB PE=1 SV=3	27.3451	21.8629	0	134.549	100.922	113.4
REVERSE28642	4	1	15.4065	0.0946807	0.0305787	3.01901	0.385732	PM54	CM55	89242.7	Reversed Sequence 28642	23.1045	39.7599	330.28	414.788	406.22	365.901
Q9NRC6	7	1	26.5248	0.094937	0.0306362	5.03785	0.385053	PM54	CM55	419488	Spectrin beta chain_ non-erythrocytic 5 OS=Homo sapiens OX=9606 GN=SPTBN5 PE=1 SV=2	0	3.56486	24.336	71.3532	28.496	40.7112
Q8NI08;Q8NI08-2;Q8NI08-7	1	1	3.917	0.0953739	0.0307376	1.60996	0.3839	PM54	CM55	106789	Nuclear receptor coactivator 7 OS=Homo sapiens OX=9606 GN=NCOA7 PE=1 SV=2	218.889	403.244	488.582	626.613	591.795	569.797
O43174;O43174-2	1	1	4.1468	0.0954085	0.0307376	5.59249	0.383809	PM54	CM55	56997.1	Cytochrome P450 26A1 OS=Homo sapiens OX=9606 GN=CYP26A1 PE=1 SV=2	15.7724	11.5974	0	39.7513	54.5783	58.7362
Q9BZF9;F5H2B9;H0YNH8;Q9BZF9-2	4	1	15.877	0.0965661	0.0310849	1.4163	0.380789	CM55	PM54	163646	Uveal autoantigen with coiled-coil domains and ankyrin repeats OS=Homo sapiens OX=9606 GN=UACA PE=1 SV=2	451.21	290.695	423.036	314.074	261.595	246.858
P17987;E7ERF2;E7EQR6;F5H282;F5GZ03;F5GZI8;F5H136;F5GYL4;F5H676;F5H7Y1;F5H726	16	9	116.222	0.09705	0.0312149	1.09975	0.37954	PM54	CM55	60856.9	T-complex protein 1 subunit alpha OS=Homo sapiens OX=9606 GN=TCP1 PE=1 SV=1	1825.51	1676.38	1805.98	1975.79	2043.29	1818.24
Q8N3R3	1	1	3.9862	0.0973184	0.0312751	1.20963	0.378851	CM55	PM54	58495.2	T-cell activation inhibitor_ mitochondrial OS=Homo sapiens OX=9606 GN=TCAIM PE=2 SV=2	293.897	326.799	323.541	301.725	225.541	253.336
P63244;J3KPE3;H0Y8W2;D6RAC2;D6REE5;H0YAF8;H0YAM7;D6R9Z1;D6RFX4;D6RHH4;D6RAU2;D6RBD0;D6RFZ9;E9PD14;H0Y8R5;D6RF23;H0Y9P0;D6R909;D6RGK8;D6RDI0;D6RHJ5	16	8	105.152	0.0973972	0.0312751	1.06815	0.378649	CM55	PM54	35533	Receptor of activated protein C kinase 1 OS=Homo sapiens OX=9606 GN=RACK1 PE=1 SV=3	3674.69	3743.49	4002.95	3669.58	3476.98	3545.86
Q76NI1;Q76NI1-3;Q76NI1-2;Q76NI1-4;Q76NI1-5	9	1	38.1329	0.0978087	0.0313815	5.13305	0.377598	PM54	CM55	193621	Kinase non-catalytic C-lobe domain-containing protein 1 OS=Homo sapiens OX=9606 GN=KNDC1 PE=2 SV=2	1.16686	22.4004	48.1231	160.955	100.827	106.208
A0A087WYG2;E9PFH7;Q9UPT6	2	1	7.3293	0.0984292	0.0315546	3.87119	0.376025	PM54	CM55	148742	C-Jun-amino-terminal kinase-interacting protein 3 OS=Homo sapiens OX=9606 GN=MAPK8IP3 PE=1 SV=1	0	0	92.8782	114.95	123.971	120.628
Q9Y281;Q9Y281-3;F8WDN3	6	2	46.4125	0.0987049	0.0316045	1.0686	0.375329	CM55	PM54	18850.7	Cofilin-2 OS=Homo sapiens OX=9606 GN=CFL2 PE=1 SV=1	2685.72	2623.68	2714.39	2417.3	2652.99	2438.44
P21266;A0A0A0MTN3	6	1	36.325	0.0987465	0.0316045	1.05455	0.375225	CM55	PM54	27015.9	Glutathione S-transferase Mu 3 OS=Homo sapiens OX=9606 GN=GSTM3 PE=1 SV=3	2158.23	2205.41	2308.26	2060.07	2099.67	2167.04
C9JA69;Q8WY36;Q8WY36-2;C9J8D0;C9JIZ2;C9JSH4;C9JYU6;C9JZA0;C9K0D1;Q8WY36-3	3	1	10.9946	0.099323	0.031763	3.33814	0.37378	CM55	PM54	100413	HMG box transcription factor BBX OS=Homo sapiens OX=9606 GN=BBX PE=1 SV=1	44.9781	157.996	194.983	55.863	27.2878	36.0642
P23471;P23471-2;P23471-3	6	1	24.7608	0.0998578	0.0319079	1.27417	0.372449	PM54	CM55	255842	Receptor-type tyrosine-protein phosphatase zeta OS=Homo sapiens OX=9606 GN=PTPRZ1 PE=1 SV=4	1562.64	1427.73	1218.08	2062	1531.5	1768.79
A5PLK6;H3BU64;A5PLK6-2;A5PLK6-5	3	1	17.562	0.100305	0.0320245	1.82995	0.371344	PM54	CM55	126886	Regulator of G-protein signaling protein-like OS=Homo sapiens OX=9606 GN=RGSL1 PE=2 SV=1	60.0896	24.1946	45.5847	102.349	63.0538	72.2509
Q16643;Q16643-2;Q16643-3;D6R9Q9;D6R9W4;D6RCR4;D6RFI1	4	1	22.8288	0.100578	0.0320854	1.15098	0.370673	CM55	PM54	71885.6	Drebrin OS=Homo sapiens OX=9606 GN=DBN1 PE=1 SV=4	952.893	1033.62	1134.98	834.207	963.305	914.516
Q12797;Q12797-10	12	3	70.9191	0.101123	0.0322206	1.1908	0.369338	CM55	PM54	86318.9	Aspartyl/asparaginyl beta-hydroxylase OS=Homo sapiens OX=9606 GN=ASPH PE=1 SV=3	564.253	656.184	619.154	559.553	444.97	540.312
Q13596;Q13596-2;Q13596-3;H0YK42	5	1	26.1667	0.101276	0.0322206	1.43416	0.368964	CM55	PM54	59183.6	Sorting nexin-1 OS=Homo sapiens OX=9606 GN=SNX1 PE=1 SV=3	711.206	731.179	600.044	533.484	329.075	561.569
Q32P51;F8W646;F8VYN5	10	3	41.3236	0.101331	0.0322206	1.0966	0.368831	CM55	PM54	34396.5	Heterogeneous nuclear ribonucleoprotein A1-like 2 OS=Homo sapiens OX=9606 GN=HNRNPA1L2 PE=2 SV=2	6126.3	6971.02	6560.59	6214.59	5772.3	5939.29
F8W6I7;P09651;P09651-2;P09651-3;F8VZ49;H0YH80;A0A2R8Y4L2;F8VTQ5	9	1	61.6165	0.101331	0.0322206	1.0966	0.368831	CM55	PM54	33269.3	Heterogeneous nuclear ribonucleoprotein A1 OS=Homo sapiens OX=9606 GN=HNRNPA1 PE=1 SV=2	2403.58	2735	2573.97	2438.22	2264.7	2330.21
P52789;E9PB90;P52790	6	2	32.33	0.102538	0.0325777	1.15985	0.365919	CM55	PM54	103806	Hexokinase-2 OS=Homo sapiens OX=9606 GN=HK2 PE=1 SV=2	2362.11	2534.62	2317.68	2309.78	2076.66	1833.68
A0A0A0MRJ6;H7BY58;P22061;P22061-2;C9J0F2;F6S8N6	2	1	13.1307	0.102739	0.032602	1.12498	0.365436	CM55	PM54	30543.1	Protein-L-isoaspartate O-methyltransferase OS=Homo sapiens OX=9606 GN=PCMT1 PE=1 SV=1	1294.59	1136.95	1271.68	1176.84	1082.36	1032.62
P26196;Q8IV96	2	1	9.8022	0.102781	0.032602	1.46956	0.365337	PM54	CM55	54816.1	Probable ATP-dependent RNA helicase DDX6 OS=Homo sapiens OX=9606 GN=DDX6 PE=1 SV=2	443.761	384.897	233.175	489.899	511.881	558.644
A0A087WW06;Q96AY4;B0QYP5	13	1	74.5666	0.10336	0.032759	2.0914	0.36396	CM55	PM54	258693	Tetratricopeptide repeat protein 28 OS=Homo sapiens OX=9606 GN=TTC28 PE=1 SV=1	401.129	171.088	441.419	153.664	193.378	137.626
REVERSE19364	8	1	33.8314	0.10381	0.0328594	1.95817	0.362894	PM54	CM55	147117	Reversed Sequence 19364	41.703	92.7688	156.105	180.598	190.539	197.862
Q6PL18	3	1	10.6358	0.103845	0.0328594	1.77219	0.362813	CM55	PM54	159923	ATPase family AAA domain-containing protein 2 OS=Homo sapiens OX=9606 GN=ATAD2 PE=1 SV=1	75.1733	138.111	75.0697	63.6758	61.4622	37.5726
Q05682;Q05682-2;Q05682-4;Q05682-6;E7EX44;Q05682-3;Q05682-5;E9PGZ1;C9J813;C9JEK3	40	28	241.734	0.104556	0.0330578	1.04219	0.361144	CM55	PM54	93288.2	Caldesmon OS=Homo sapiens OX=9606 GN=CALD1 PE=1 SV=3	23720.9	23470.2	22559.2	22316.5	21824.2	22786.2
Q6JEL2;C9JHB3;C9J999	4	1	18.6643	0.105832	0.0334341	1.80577	0.358188	PM54	CM55	69968.1	Kelch-like protein 10 OS=Homo sapiens OX=9606 GN=KLHL10 PE=1 SV=1	147.201	421.746	346.249	499.53	556.079	597.022
O43776	6	3	33.2961	0.106342	0.0335639	1.1173	0.357019	CM55	PM54	63798.4	Asparagine--tRNA ligase_ cytoplasmic OS=Homo sapiens OX=9606 GN=NARS PE=1 SV=1	1159.03	1117.04	1180.27	1071.16	927.371	1094.93
Q13283;E5RH42;E5RI46;E5RIF8;E5RIZ6;E5RJU8;Q13283-2;E5RH00	7	2	46.9298	0.106414	0.0335639	1.08646	0.356855	CM55	PM54	52221.4	Ras GTPase-activating protein-binding protein 1 OS=Homo sapiens OX=9606 GN=G3BP1 PE=1 SV=1	1296.95	1335.14	1458.08	1295.55	1218.05	1251.09
A0A0B4J210;E5RH50;Q6PKG0;Q6PKG0-3;H0YC33	3	1	14.1468	0.106609	0.0335982	1.1503	0.356411	CM55	PM54	90993.7	La-related protein 1 (Fragment) OS=Homo sapiens OX=9606 GN=LARP1 PE=1 SV=5	617.596	584.052	666.387	515.304	603.911	504.746
Q63HR2;F8VV64;Q63HR2-4;Q63HR2-5;Q63HR2-6;Q63HR2-2	4	1	15.0791	0.107918	0.0339833	1.35582	0.353455	PM54	CM55	154462	Tensin-2 OS=Homo sapiens OX=9606 GN=TNS2 PE=1 SV=2	916.017	633.282	1071.48	1144.23	1251.37	1157.71
P26038;V9GZ54;E9PNP4;P35241-3	41	26	282.915	0.108011	0.0339851	1.06826	0.353247	PM54	CM55	67934.2	Moesin OS=Homo sapiens OX=9606 GN=MSN PE=1 SV=3	5883.95	6170.85	6537.52	6475.92	6705.1	6680.34
Q2M1Z3	3	1	12.68	0.108121	0.0339925	1.31142	0.353	CM55	PM54	158354	Rho GTPase-activating protein 31 OS=Homo sapiens OX=9606 GN=ARHGAP31 PE=1 SV=2	707.257	498.411	558.892	451.8	387.201	506.536
Q96S97;C9J5M0;C9JC07;C9JJV6;C9JZL8	3	2	18.3059	0.10836	0.0340322	1.12866	0.352468	CM55	PM54	36072	Myeloid-associated differentiation marker OS=Homo sapiens OX=9606 GN=MYADM PE=1 SV=2	1755.63	1467.38	1613.81	1358.95	1446.44	1480.08
E7ET42;O43525;A0A087WZB4;A0A1W2PQ71;O43525-2	3	1	12.1094	0.108504	0.0340322	1.16614	0.352146	CM55	PM54	95864.4	Potassium voltage-gated channel subfamily KQT member 3 OS=Homo sapiens OX=9606 GN=KCNQ3 PE=3 SV=1	722.607	748.548	634.453	539.387	616.122	650.115
Q9BYW2;H7C3H4;Q9BYW2-2;Q9BYW2-3;C9JG86;H7BZ93;H7BXT4	14	1	54.4498	0.108509	0.0340322	1.72426	0.352137	PM54	CM55	290619	Histone-lysine N-methyltransferase SETD2 OS=Homo sapiens OX=9606 GN=SETD2 PE=1 SV=3	552.569	961.09	1506.43	1791.93	1479.64	1935.87
A7E2Y1;A0A087X0T3;A7E2Y1-3;Q5JW45;Q5JW46;Q5JW48;A7E2Y1-2;Q5JW47;Q5JW49	30	2	166.981	0.108872	0.034114	1.05914	0.35133	PM54	CM55	227100	Myosin-7B OS=Homo sapiens OX=9606 GN=MYH7B PE=1 SV=4	481.439	456.444	481.41	508.796	514.423	480.018
E9PAM4;Q9BTU6	1	1	4.7181	0.108944	0.034114	1.16825	0.35117	CM55	PM54	51789.2	Uncharacterized protein OS=Homo sapiens OX=9606 PE=4 SV=1	473.468	534.394	586.464	418.514	479.434	466.764
REVERSE12451	1	1	4.5906	0.109791	0.0343515	1.28982	0.349308	PM54	CM55	86281.2	Reversed Sequence 12451	477.732	588.082	708.47	676.449	826.717	785.34
REVERSE2695	2	1	7.7111	0.110429	0.0345237	2.97629	0.347915	CM55	PM54	65932.1	Reversed Sequence 2695	276.751	466.293	198.566	188.097	25.1489	103.124
P60866;P60866-2;E5RIP1;E5RJX2;G3XAN0	3	2	29.8895	0.112589	0.0351707	1.12165	0.343283	PM54	CM55	13486.8	40S ribosomal protein S20 OS=Homo sapiens OX=9606 GN=RPS20 PE=1 SV=1	886.207	971.293	841.772	1042.5	933.447	1051.69
REVERSE26446	3	1	17.9992	0.112742	0.0351888	4.45483	0.342958	PM54	CM55	116381	Reversed Sequence 26446	51.4816	0	6.94034	72.9742	87.8859	99.4001
Q92556;Q92556-2;Q92556-3	2	1	12.4208	0.112827	0.0351888	1.17042	0.342779	PM54	CM55	84571	Engulfment and cell motility protein 1 OS=Homo sapiens OX=9606 GN=ELMO1 PE=1 SV=2	3195.46	3409.21	2712.43	3443.97	3531.65	3929.27
Q5CZC0-2	22	4	87.9146	0.113469	0.0353608	1.23112	0.341429	CM55	PM54	394669	Isoform 2 of Fibrous sheath-interacting protein 2 OS=Homo sapiens OX=9606 GN=FSIP2	236.94	285.404	321.363	216.64	250.141	218.538
Q02818;H7BZI1;C9JKZ2	7	2	38.8676	0.113869	0.0354571	2.8186	0.340593	CM55	PM54	53879.4	Nucleobindin-1 OS=Homo sapiens OX=9606 GN=NUCB1 PE=1 SV=4	168.81	175.226	586.253	143.491	86.6133	99.949
H0Y2S9;H0Y7E2;H7C3G6	13	1	58.9264	0.113985	0.0354652	1.80053	0.340349	PM54	CM55	204686	Myosin phosphatase Rho-interacting protein (Fragment) OS=Homo sapiens OX=9606 GN=MPRIP PE=1 SV=3	140.329	116.144	55.1862	142.028	231.948	187.176
O60313;A0A2R8YDM2;A0A2R8YE78;A0A2R8YGE5;C9JMB8;O60313-2;A0A2R8Y3X5;A0A2R8YD53;E5KLJ9;O60313-10;O60313-11;O60313-13;O60313-9;A0A2R8Y4G4;A0A2R8Y4Q3;A0A2R8Y5G3;A0A2R8YE54;C9JY58	5	1	30.7708	0.114257	0.0355214	4.50345	0.339785	CM55	PM54	112201	Dynamin-like 120 kDa protein_ mitochondrial OS=Homo sapiens OX=9606 GN=OPA1 PE=1 SV=3	26.2919	115.059	145.907	4.96105	54.4067	4.41831
E5RHG6;E5RIW3;E5RJD8;O75347;O75347-2	2	2	11.5834	0.11472	0.0356372	1.1842	0.338825	CM55	PM54	15119.4	Tubulin-specific chaperone A OS=Homo sapiens OX=9606 GN=TBCA PE=1 SV=2	620.991	570.096	741.679	557.904	517.393	556.835
A0A0D9SEN1;B4DLR2;Q12884;Q12884-2;C9J131;H7C4D9	7	1	42.0243	0.115423	0.0358094	1.93473	0.337381	PM54	CM55	88268.8	Prolyl endopeptidase FAP OS=Homo sapiens OX=9606 GN=FAP PE=1 SV=1	443.717	423.356	135.1	690.046	586.376	662.511
Q13162;H7C3T4;A6NG45;A6NJJ0	8	3	55.5187	0.115458	0.0358094	1.09628	0.337308	CM55	PM54	30768	Peroxiredoxin-4 OS=Homo sapiens OX=9606 GN=PRDX4 PE=1 SV=1	829.322	822.556	914.351	734.014	795.768	811.066
Q9Y224;G3V4C6;H0YJB9;G3V4E7	7	4	33.4616	0.115903	0.0359188	1.18397	0.3364	PM54	CM55	28182.2	RNA transcription_ translation and transport factor protein OS=Homo sapiens OX=9606 GN=RTRAF PE=1 SV=1	601.028	624.95	795.515	800.784	782.596	810.009
REVERSE17888	8	1	31.7842	0.116122	0.035931	Infinity	0.335955	CM55	PM54	148420	Reversed Sequence 17888	0	86.3699	89.6314	0	0	0
REVERSE63911	2	1	11.8735	0.116126	0.035931	Infinity	0.335946	CM55	PM54	71821.3	Reversed Sequence 63911	93.232	0	88.6312	0	0	0
Q9Y5G4;Q9Y5G4-2	4	1	16.2043	0.116513	0.0359998	6.32294	0.335161	PM54	CM55	102257	Protocadherin gamma-A9 OS=Homo sapiens OX=9606 GN=PCDHGA9 PE=2 SV=1	31.4901	47.4411	0	183.921	161.062	154.094
P14866;M0QXS5;P14866-2;M0R076;B4DVF8;M0R1W6	11	1	64.181	0.116544	0.0359998	1.11718	0.335098	CM55	PM54	64760.2	Heterogeneous nuclear ribonucleoprotein L OS=Homo sapiens OX=9606 GN=HNRNPL PE=1 SV=2	1921.49	1649.53	1900.47	1698.76	1634.28	1564.57
K7EK42;K7EP07;Q99426;Q99426-2;K7EL99;K7EQH0;K7ER04	2	1	14.8345	0.116625	0.0359998	1.4634	0.334935	CM55	PM54	21524.1	Tubulin-folding cofactor B OS=Homo sapiens OX=9606 GN=TBCB PE=1 SV=1	108.575	103.672	90.5894	88.3425	45.0221	73.5755
REVERSE28370	9	1	39.874	0.118125	0.036434	1.80609	0.331932	CM55	PM54	199983	Reversed Sequence 28370	148.065	133.644	78.0567	41.1654	66.5814	91.4487
REVERSE14405	1	1	4.0848	0.118392	0.0364877	1.19143	0.331401	CM55	PM54	91973	Reversed Sequence 14405	1150.75	1136.24	1447.77	1013.26	1116.62	1004.79
P55854;A8MU27;A8MUA9;P55854-2;P61956;P61956-2;Q6EEV6	4	1	12.9786	0.120164	0.0369935	1.11048	0.32793	CM55	PM54	11694.1	Small ubiquitin-related modifier 3 OS=Homo sapiens OX=9606 GN=SUMO3 PE=1 SV=2	2524.15	2676.17	2332.41	2257.36	2126.08	2399.9
Q9UGI8;Q9UGI8-2	4	1	23.7431	0.120223	0.0369935	2.41214	0.327815	PM54	CM55	49821.4	Testin OS=Homo sapiens OX=9606 GN=TES PE=1 SV=1	277.787	48.1979	261.578	499.716	437.385	480.182
O60858;O60858-2;O60858-3;X6R9U5	1	1	4.1081	0.120372	0.0370103	1.81634	0.327526	PM54	CM55	47843	E3 ubiquitin-protein ligase TRIM13 OS=Homo sapiens OX=9606 GN=TRIM13 PE=1 SV=2	126.388	372.272	307.358	577.992	478.148	407.859
Q9UPU5	7	1	33.1165	0.12153	0.037337	2.24634	0.325299	PM54	CM55	297388	Ubiquitin carboxyl-terminal hydrolase 24 OS=Homo sapiens OX=9606 GN=USP24 PE=1 SV=3	36.433	185.175	88.3887	318.432	192.483	185.442
P46777;A0A2R8Y6J3;Q5T7N0;A0A2R8Y4A2	12	10	83.4153	0.122321	0.0375504	1.14447	0.323795	PM54	CM55	34590.8	60S ribosomal protein L5 OS=Homo sapiens OX=9606 GN=RPL5 PE=1 SV=3	1446.43	1668.28	1834.63	1839.12	1952.1	1873.18
REVERSE23708	1	1	4.5945	0.122565	0.0375959	1.27661	0.323333	CM55	PM54	81320.1	Reversed Sequence 23708	573.245	676.781	657.055	550.877	556.991	386
Q9H3W5	2	1	4.408	0.123075	0.0377228	5.74671	0.322372	PM54	CM55	80393.9	Leucine-rich repeat neuronal protein 3 OS=Homo sapiens OX=9606 GN=LRRN3 PE=2 SV=1	31.4837	0.139489	49.5217	176.944	165.647	123.724
P17858;P17858-2	8	2	54.5274	0.123835	0.0379057	1.17937	0.320951	PM54	CM55	85817	ATP-dependent 6-phosphofructokinase_ liver type OS=Homo sapiens OX=9606 GN=PFKL PE=1 SV=6	382.535	284.597	350.446	393.328	410.326	396.442
P09486;F5GY03;E5RK62	6	1	34.8618	0.123907	0.0379057	1.0952	0.320816	PM54	CM55	35487.6	SPARC OS=Homo sapiens OX=9606 GN=SPARC PE=1 SV=1	318.634	335.574	346.323	394.511	352.32	348.949
P13639;K7EJ74;K7EP67	54	45	299.568	0.124002	0.0379057	1.04361	0.320641	CM55	PM54	96307.8	Elongation factor 2 OS=Homo sapiens OX=9606 GN=EEF2 PE=1 SV=4	10032.3	9794.72	9416.81	9479.54	9125.5	9416.63
Q9NP72;A0A087X163;Q5W0J0;Q9NP72-2;Q9NP72-3;H0Y6T8	3	1	18.1131	0.12406	0.0379057	2.72124	0.320533	CM55	PM54	23262.2	Ras-related protein Rab-18 OS=Homo sapiens OX=9606 GN=RAB18 PE=1 SV=1	87.7929	125.719	201.229	95.7793	12.384	44.2457
REVERSE18166	7	1	30.3771	0.124261	0.0379375	5.68738	0.320159	PM54	CM55	172852	Reversed Sequence 18166	0	63.081	26.0349	171.481	150.131	185.224
Q92794;A5PLL3	5	1	22.8942	0.124555	0.0379974	5.18366	0.319616	PM54	CM55	227708	Histone acetyltransferase KAT6A OS=Homo sapiens OX=9606 GN=KAT6A PE=1 SV=2	18.9013	33.5729	0	72.5202	115.624	83.8634
Q13201;E7EPG1;Q13201-2	5	1	22.0638	0.125132	0.0381229	1.18914	0.318552	CM55	PM54	139308	Multimerin-1 OS=Homo sapiens OX=9606 GN=MMRN1 PE=1 SV=3	266.072	200.119	216.91	186.868	195.843	191.739
REVERSE26628	6	1	28.2408	0.125161	0.0381229	2.50196	0.318499	PM54	CM55	239343	Reversed Sequence 26628	34.5317	12.0676	136.154	170.695	161.095	125.45
A0A0A0MRY4;Q96N96-6;E9PFR9;J3KQJ8;Q96N96;Q96N96-2;Q96N96-3;Q96N96-4;Q96N96-5	2	1	8.4697	0.125318	0.0381409	1.72379	0.318212	PM54	CM55	123637	Uncharacterized protein OS=Homo sapiens OX=9606 PE=4 SV=1	58.3853	106.178	184.604	206.257	182.472	213.164
Q495T6;Q495T6-2	3	1	12.7894	0.125457	0.0381536	2.27703	0.317956	PM54	CM55	90051.3	Membrane metallo-endopeptidase-like 1 OS=Homo sapiens OX=9606 GN=MMEL1 PE=2 SV=2	106.666	28.2134	177.312	248.715	205.55	256.605
REVERSE34383	1	1	3.9916	0.126097	0.0383126	1.74103	0.31679	PM54	CM55	73143.3	Reversed Sequence 34383	48.8302	42.1175	100.298	138.644	79.5692	114.751
Q5HYC2;Q5HYC2-2	1	1	3.5529	0.126176	0.0383126	1.26519	0.316647	PM54	CM55	230084	Uncharacterized protein KIAA2026 OS=Homo sapiens OX=9606 GN=KIAA2026 PE=2 SV=2	291.36	370.021	385.811	370.45	466.347	488.103
P11717;S4R328	13	1	56.2851	0.126468	0.0383714	2.74011	0.316118	PM54	CM55	281332	Cation-independent mannose-6-phosphate receptor OS=Homo sapiens OX=9606 GN=IGF2R PE=1 SV=3	121.477	22.6263	30.8699	170.919	233.383	75.1446
P62942;A0A087WZM5;Q5W0X3;A0A087WTS4;A0A087WV48;Q1JUQ3;Q1JUQ5	3	2	20.0956	0.126756	0.038429	1.33642	0.315597	CM55	PM54	12007.8	Peptidyl-prolyl cis-trans isomerase FKBP1A OS=Homo sapiens OX=9606 GN=FKBP1A PE=1 SV=2	790.385	1014.07	642.913	605.19	553.229	672.866
REVERSE13426	6	1	23.9881	0.127367	0.0385841	1.99465	0.314499	CM55	PM54	205148	Reversed Sequence 13426	519.081	240.573	554.382	263.655	133.458	261.668
REVERSE10991	8	1	37.7395	0.128285	0.0388323	1.1458	0.312861	CM55	PM54	186870	Reversed Sequence 10991	2988.7	2460.99	2543.61	2467.35	2179.58	2329.24
O00148;O00148-2;K7EQN7;O00148-3;K7EPJ3;A0A0A0MT12;A0A0G2JHN7;A0A0G2JJL7;F6QYI9;F6R6M7;F6S2B7;F6S4E6;F6SXL5;F6TRA5;F6U6E2;H0Y400;K7EIL8;K7EL56;K7EN69;K7ENP6	6	1	36.5185	0.128723	0.0389348	1.24614	0.312086	CM55	PM54	49642.9	ATP-dependent RNA helicase DDX39A OS=Homo sapiens OX=9606 GN=DDX39A PE=1 SV=2	862.497	1170.39	881.553	815.131	823.382	700.26
REVERSE6213	5	1	22.5538	0.129433	0.0391191	1.31745	0.310837	CM55	PM54	69661.4	Reversed Sequence 6213	416.633	579.031	652.266	433.056	401.164	416.629
Q03001-13;A0A0J9YX05	4	1	17.3715	0.129805	0.0391931	1.23525	0.310186	PM54	CM55	103496	Isoform 8 of Dystonin OS=Homo sapiens OX=9606 GN=DST	68.5872	60.0226	54.2458	73.2106	65.1313	87.53
REVERSE28133	3	1	18.2734	0.129878	0.0391931	4.05187	0.310059	PM54	CM55	187691	Reversed Sequence 28133	8.10235	0	96.6371	91.4904	185.406	147.495
P32119;A6NIW5	7	2	38.8547	0.129984	0.0391947	1.09361	0.309874	CM55	PM54	22063	Peroxiredoxin-2 OS=Homo sapiens OX=9606 GN=PRDX2 PE=1 SV=5	942.272	827.502	886.9	766.473	822.158	840.645
REVERSE7467	14	2	64.7783	0.1307	0.0393514	1.16064	0.308632	CM55	PM54	116294	Reversed Sequence 7467	3057.65	3443.82	3781.16	2845.33	2776.6	3237.54
P63000;P63000-2;B1AH77;B1AH78;B1AH80;P60763;J3KSC4;J3QLK0;B1AH79;F8WET9;G3V476;G3V4H1;P17081;Q9H4E5;Q9H4E5-2	7	1	48.9914	0.130705	0.0393514	1.11291	0.308623	CM55	PM54	21849.3	Ras-related C3 botulinum toxin substrate 1 OS=Homo sapiens OX=9606 GN=RAC1 PE=1 SV=1	1676.37	1505.34	1437.5	1360.27	1470.78	1319.51
Q03001-3;H0YAT7	16	2	69.82	0.130912	0.0393835	1.19239	0.308264	PM54	CM55	309151	Isoform 3 of Dystonin OS=Homo sapiens OX=9606 GN=DST	370.632	271.489	338.094	380.873	412.273	375.652
Q9Y696	16	8	104.295	0.131266	0.0394595	1.07388	0.307655	PM54	CM55	29000.3	Chloride intracellular channel protein 4 OS=Homo sapiens OX=9606 GN=CLIC4 PE=1 SV=4	5197.24	5517.09	5548.12	5507.9	5824.33	6131.62
Q9UQ80;Q9UQ80-2;F8VR77;F8W0A3;H0YIN7;F8VZ69	7	1	40.1561	0.131458	0.039487	2.6725	0.307325	PM54	CM55	44129.1	Proliferation-associated protein 2G4 OS=Homo sapiens OX=9606 GN=PA2G4 PE=1 SV=3	17.9045	31.9792	129.332	169.694	227.531	81.728
Q86VS8	2	1	12.2613	0.131823	0.0395661	1.1602	0.3067	CM55	PM54	83525.2	Protein Hook homolog 3 OS=Homo sapiens OX=9606 GN=HOOK3 PE=1 SV=2	4853.05	3851.74	4313.71	3628.06	4031.53	3561.34
P17174;P17174-2	6	1	33.7201	0.132193	0.0396468	5.2017	0.306068	PM54	CM55	46475.7	Aspartate aminotransferase_ cytoplasmic OS=Homo sapiens OX=9606 GN=GOT1 PE=1 SV=3	0	59.9387	21.0679	123.197	192.084	106.092
P38646;D6RJI2;H0Y8S0;D6RA73;H0YBG6	21	9	148.417	0.134267	0.0402377	1.16762	0.302577	CM55	PM54	73965.8	Stress-70 protein_ mitochondrial OS=Homo sapiens OX=9606 GN=HSPA9 PE=1 SV=2	1749.3	1884.99	2270.82	1732.3	1629.69	1695.42
O75131;H0YB26;A0A087WYQ3;E5RHZ0;A0A087WXR6;A0A087WUS8;E5RFT7	7	2	40.1477	0.134699	0.0403363	1.30569	0.301858	PM54	CM55	60986.1	Copine-3 OS=Homo sapiens OX=9606 GN=CPNE3 PE=1 SV=1	298.04	271.889	414.856	494.774	391.319	399.73
Q9Y233;Q9Y233-2	4	1	16.8447	0.136023	0.0407015	1.589	0.299677	CM55	PM54	89667.2	cAMP and cAMP-inhibited cGMP 3'_5'-cyclic phosphodiesterase 10A OS=Homo sapiens OX=9606 GN=PDE10A PE=1 SV=1	53.0477	74.4356	93.0288	42.7151	32.3444	63.7146
Q5XKE5	8	3	43.2252	0.136164	0.0407127	1.19496	0.299446	CM55	PM54	58120.8	Keratin_ type II cytoskeletal 79 OS=Homo sapiens OX=9606 GN=KRT79 PE=1 SV=2	1014.13	1124.29	1134.4	753.971	966.192	1018.7
M0QXA0;Q8N6T7;Q8N6T7-2;M0QZ09;M0R0B2;M0R1F6	2	1	8.8453	0.136597	0.0407955	1.49801	0.29874	PM54	CM55	20477	NAD-dependent protein deacetylase sirtuin-6 OS=Homo sapiens OX=9606 GN=SIRT6 PE=1 SV=1	94.2808	126.125	213.92	227.098	191.83	231.694
P43686;P43686-2	3	1	14.1245	0.13665	0.0407955	1.3545	0.298654	PM54	CM55	47480.4	26S proteasome regulatory subunit 6B OS=Homo sapiens OX=9606 GN=PSMC4 PE=1 SV=2	241.049	141.01	168.375	256.032	214.572	274.959
A0A087WSZ7;A0A1B0GW84;Q08499;Q08499-10;Q08499-11;Q08499-2;Q08499-3;Q08499-6;Q08499-9	1	1	10.5312	0.136907	0.040841	1.73135	0.298237	PM54	CM55	77536.6	Phosphodiesterase OS=Homo sapiens OX=9606 GN=PDE4D PE=1 SV=1	53.9447	109.108	144.355	171.048	224.908	136.274
Q7Z7G8;Q7Z7G8-2;Q7Z7G8-6;Q7Z7G8-3;H0YB72;Q7Z7G8-4;Q7Z7G8-5	21	3	89.8928	0.137346	0.0409062	1.22809	0.297527	CM55	PM54	454596	Vacuolar protein sorting-associated protein 13B OS=Homo sapiens OX=9606 GN=VPS13B PE=1 SV=2	187.321	193.525	175.091	161.877	119.141	171.667
O00159;F5H6E2;O00159-2;O00159-3;I3L204;I3L3Y6;I3L501;I3L3F5	15	6	80.5175	0.137365	0.0409062	1.07242	0.297495	PM54	CM55	122537	Unconventional myosin-Ic OS=Homo sapiens OX=9606 GN=MYO1C PE=1 SV=4	1325.54	1332.91	1489.7	1477.67	1470.89	1500.01
Q9BXS5;Q9BXS5-2;E7ENJ6;K7EJL1;A0A087WZX7;K7ENA7;K7EPJ8;K7EQX3;K7ER75	5	1	20.8901	0.137468	0.0409062	1.24682	0.297329	CM55	PM54	48758.1	AP-1 complex subunit mu-1 OS=Homo sapiens OX=9606 GN=AP1M1 PE=1 SV=3	1139.15	859.201	901.333	849.555	818.439	657.665
REVERSE5552	4	1	16.4787	0.137544	0.0409062	1.39535	0.297207	PM54	CM55	86312.8	Reversed Sequence 5552	386.746	427.066	242.287	562.781	427.816	483.027
Q86Y07;Q86Y07-3;Q86Y07-4	1	1	3.4445	0.137896	0.0409798	1.6154	0.29664	PM54	CM55	58596.8	Serine/threonine-protein kinase VRK2 OS=Homo sapiens OX=9606 GN=VRK2 PE=1 SV=3	693.093	458.15	545.974	581.349	1184.92	975.413
REVERSE10935	5	1	19.5808	0.138438	0.0411094	1.63343	0.295773	CM55	PM54	114290	Reversed Sequence 10935	628.293	289.671	381.042	240.792	309.871	244.599
P49792	24	5	122.328	0.138569	0.0411173	1.0725	0.295563	PM54	CM55	362591	E3 SUMO-protein ligase RanBP2 OS=Homo sapiens OX=9606 GN=RANBP2 PE=1 SV=2	993.688	931.352	973.352	982.542	1098.17	1027.81
Q5VU43;A0A075B749;A0A087WVF8;A0A087WX83;A0A0A0MRM1;Q5VU43-3;Q5VU43-4;Q5VU43-6;Q5VU43-7;E9PQG4;Q5VU43-13;Q5VU43-2;H0YCY0;A0A087WYE4;E9PS60;Q5VU43-10;Q5VU43-11;Q5VU43-12;Q5VU43-8;Q5VU43-9	9	1	45.7891	0.139995	0.0415089	1.11497	0.293306	PM54	CM55	266472	Myomegalin OS=Homo sapiens OX=9606 GN=PDE4DIP PE=1 SV=3	866.614	712.703	797.939	867.239	922.19	861.137
REVERSE17999	3	1	11.0704	0.140417	0.0415875	1.10691	0.292645	CM55	PM54	96158.9	Reversed Sequence 17999	1995.82	1808.38	2010.35	1882.45	1754.55	1615.97
P53618;E9PP73;E9PKQ1;E9PP63	18	4	97.9297	0.140473	0.0415875	1.08262	0.292556	CM55	PM54	108283	Coatomer subunit beta OS=Homo sapiens OX=9606 GN=COPB1 PE=1 SV=3	964.01	954.034	1010.99	951.124	832.582	921.794
Q9HBL0;A0A2R8Y4T1;E9PF55;E9PGF5;A0A087WWW7;E7EMG1;E7ERH1;H0Y4U1;Q9HBL0-2;C9J8K5;C9JFT7;C9JI43	8	1	42.765	0.14066	0.0416111	1.6956	0.292265	CM55	PM54	186614	Tensin-1 OS=Homo sapiens OX=9606 GN=TNS1 PE=1 SV=2	367.01	269.989	162.897	163.449	122.578	185.72
REVERSE14001	16	3	68.7677	0.14245	0.0421088	1.96188	0.289495	CM55	PM54	377445	Reversed Sequence 14001	688.173	323.608	250.626	176.826	262.084	204.559
REVERSE26703	2	1	9.3497	0.142807	0.0421798	2.75978	0.288948	PM54	CM55	269479	Reversed Sequence 26703	4.58761	28.7068	112.089	152.344	115.329	133.553
P09211;A8MX94;A0A087X2E9;A0A087X243;A0A2R8Y5E5	14	11	104.157	0.142906	0.0421798	1.03715	0.288796	CM55	PM54	23584	Glutathione S-transferase P OS=Homo sapiens OX=9606 GN=GSTP1 PE=1 SV=2	14113.5	14177.2	13646.2	13913.8	13226.2	13294.6
Q9H2C0	4	1	16.0345	0.143198	0.0422343	1.31853	0.28835	PM54	CM55	68722.1	Gigaxonin OS=Homo sapiens OX=9606 GN=GAN PE=1 SV=1	361.683	600.968	586.243	684.673	660.092	697.498
B4E2D5;F6S7C4;Q8NEM7;Q8NEM7-2;Q8NEM7-3;R4GND2;H7C5F9	3	1	17.2787	0.143702	0.0423509	4.16459	0.287585	CM55	PM54	56855.1	Transcription factor SPT20 homolog OS=Homo sapiens OX=9606 GN=SUPT20H PE=1 SV=1	425.411	433.168	118.723	112.432	7.83217	114.405
Q15717;Q15717-2;M0QZR9	6	1	31.2641	0.144217	0.0424705	1.79275	0.286808	PM54	CM55	36263	ELAV-like protein 1 OS=Homo sapiens OX=9606 GN=ELAVL1 PE=1 SV=2	143.18	272.381	68.6994	255.648	295.44	317.071
P41252;A0A0A0MSX9;J3KR24;Q5TCD1;Q5TCC6;Q5TCC9	13	4	78.6552	0.144625	0.0425586	1.1341	0.286194	PM54	CM55	145810	Isoleucine--tRNA ligase_ cytoplasmic OS=Homo sapiens OX=9606 GN=IARS PE=1 SV=2	486.611	564.719	576.101	629.659	562.205	653.812
REVERSE20878	6	1	27.1984	0.145131	0.0426755	1.05565	0.285435	CM55	PM54	290183	Reversed Sequence 20878	17116.6	16315.7	17418.1	15743.6	15631.3	16795
Q13442;F8WBW6	3	1	18.1746	0.146389	0.043013	1.11371	0.283567	PM54	CM55	20630	28 kDa heat- and acid-stable phosphoprotein OS=Homo sapiens OX=9606 GN=PDAP1 PE=1 SV=1	1663.73	1930.58	1824.94	2082.64	1849.17	2103.67
Q9C000	1	1	4.2566	0.148063	0.0434723	1.53705	0.281115	PM54	CM55	167919	NACHT_ LRR and PYD domains-containing protein 1 OS=Homo sapiens OX=9606 GN=NLRP1 PE=1 SV=1	113.067	75.9535	200.28	186.085	199.709	212.579
Q96HC4;Q96HC4-4;Q96HC4-6;Q96HC4-7;H0Y8Y3;A0A0A0MSP3;Q96HC4-2;Q96HC4-3;A0A0D9SFR4;H0YBI4;H0Y929	7	5	45.147	0.148212	0.0434832	1.1019	0.2809	CM55	PM54	65142.8	PDZ and LIM domain protein 5 OS=Homo sapiens OX=9606 GN=PDLIM5 PE=1 SV=5	796.801	733.394	681.306	699.267	633.731	673.985
P25705;P25705-2;P25705-3;K7EK77;K7ERX7;K7EJP1;K7EQH4;K7ENJ4;K7ESA0	23	20	144.661	0.149088	0.0436852	1.03038	0.279635	CM55	PM54	59864.8	ATP synthase subunit alpha_ mitochondrial OS=Homo sapiens OX=9606 GN=ATP5F1A PE=1 SV=1	8586.58	8500.81	8589.43	8326.83	8058.98	8533.88
P35580;P35580-2;P35580-3;P35580-4;P35580-5;E7ERA5	52	6	472.642	0.149124	0.0436852	1.3077	0.279583	PM54	CM55	229969	Myosin-10 OS=Homo sapiens OX=9606 GN=MYH10 PE=1 SV=3	900.515	614.79	641.529	1123.83	870.704	825.963
REVERSE17385	5	2	22.4664	0.149511	0.0437658	1.10875	0.279027	CM55	PM54	113674	Reversed Sequence 17385	596.783	570.25	686.307	564.852	555.977	550.734
P16402;P10412;P16403;P22492;Q02539	7	6	25.268	0.149786	0.0438133	2.64715	0.278634	PM54	CM55	22349.9	Histone H1.3 OS=Homo sapiens OX=9606 GN=HIST1H1D PE=1 SV=2	23.679	193.696	338.113	462.47	524.669	483.32
P19367;P19367-2;P19367-3;P19367-4;B1AR63;B1AR62	10	1	65.6747	0.150201	0.043902	1.15338	0.278042	CM55	PM54	103627	Hexokinase-1 OS=Homo sapiens OX=9606 GN=HK1 PE=1 SV=3	288.944	312.084	284.162	221.201	289.772	256.505
REVERSE28994	7	1	28.9832	0.151172	0.0441529	3.21416	0.276665	PM54	CM55	208296	Reversed Sequence 28994	0	30.6861	6.76353	46.8459	38.0798	35.4435
REVERSE5553	3	1	13.3151	0.152481	0.0445018	1.28206	0.274831	PM54	CM55	62737.2	Reversed Sequence 5553	307.334	417.692	248.273	400.93	438.673	408.227
Q9UII4	2	1	7.5155	0.152852	0.0445768	1.37261	0.274316	CM55	PM54	118278	E3 ISG15--protein ligase HERC5 OS=Homo sapiens OX=9606 GN=HERC5 PE=1 SV=2	232.828	306.279	195.626	138.176	196.819	200.287
Q15019;Q15019-2;Q15019-3;B5MCX3;C9IZU3;C9J938;C9JB25;C9JQJ4;C9IY94;C9J2Q4;C9JZI2;H7C310;A0A1B0GXJ2;B5MD47;C9JFT1;F8WB65;C9JSE7;C9JT15;H7C2Y0	9	5	64.6375	0.153444	0.0447162	1.06317	0.273495	CM55	PM54	41715.7	Septin-2 OS=Homo sapiens OX=9606 GN=SEPT2 PE=1 SV=1	4286.85	4590.22	4475.37	4347.69	3953.44	4257.89
J3KTA4;P17844;P17844-2;J3KRZ1;J3QRQ7;J3QSF1;J3KRX8;J3KTQ4;J3QR02;X6RLV5	8	1	47.7468	0.154111	0.0448772	1.17027	0.272577	CM55	PM54	69600.5	Probable ATP-dependent RNA helicase DDX5 OS=Homo sapiens OX=9606 GN=DDX5 PE=1 SV=1	587.912	488.107	633.239	460.381	474.615	525.569
Q9UN86;Q9UN86-2	2	1	9.6162	0.154333	0.0449084	1.23137	0.272273	PM54	CM55	54178.3	Ras GTPase-activating protein-binding protein 2 OS=Homo sapiens OX=9606 GN=G3BP2 PE=1 SV=2	154.757	231.34	203.562	258.948	224.592	242.548
P11413;P11413-2;P11413-3;E9PD92;E7EM57;E7EUI8	14	7	88.1893	0.156061	0.0453567	1.11962	0.269926	CM55	PM54	59713.1	Glucose-6-phosphate 1-dehydrogenase OS=Homo sapiens OX=9606 GN=G6PD PE=1 SV=4	7611.13	8790.34	8298	8096.43	6885.38	7078.88
Q13751;Q5THA1;X1WI29	6	1	30.5464	0.156106	0.0453567	1.56126	0.269865	CM55	PM54	133451	Laminin subunit beta-3 OS=Homo sapiens OX=9606 GN=LAMB3 PE=1 SV=1	107.805	199.972	197.4	104.097	134.634	84.8393
P09960;P09960-2;P09960-4;P09960-3;B4DEH5	14	5	89.4874	0.158089	0.0458738	1.1467	0.267219	PM54	CM55	69912.7	Leukotriene A-4 hydrolase OS=Homo sapiens OX=9606 GN=LTA4H PE=1 SV=2	567.208	638.82	729.799	688.833	776.941	754.043
Q9Y623;Q9UKX2-2	29	1	152.228	0.158121	0.0458738	1.11695	0.267177	CM55	PM54	224041	Myosin-4 OS=Homo sapiens OX=9606 GN=MYH4 PE=2 SV=2	240.184	258.713	238.8	236.948	194.833	228.677
A0A2R8YGG3;P51532;Q9HBD4;A0A2R8YG32;A0A0A0MT49;A0A2R8Y4P4;A0A2R8Y7S2;P51532-2;P51532-3;P51532-4;P51532-5;A0A2R8Y440;A0A2R8Y4C5;A0A2R8Y523;A0A2R8Y526;A0A2R8Y5K3;A0A2R8Y6N0;A0A2R8Y6V2;A0A2R8Y7F3;A0A2R8Y7Y7;A0A2R8YDA1;A0A2R8YF58;A0A2R8YF80	5	2	20.8127	0.159144	0.0461362	1.06353	0.26583	CM55	PM54	165730	Transcription activator BRG1 (Fragment) OS=Homo sapiens OX=9606 GN=SMARCA4 PE=1 SV=1	3384.55	3184	3418.25	2956.84	3208.22	3225.19
Q7Z406;Q7Z406-2;Q7Z406-6;Q7Z406-4;Q7Z406-5;M0QY43;A0A0C4DFM8;A1L2Z2	23	1	194.493	0.159329	0.0461556	1.13613	0.265588	PM54	CM55	228840	Myosin-14 OS=Homo sapiens OX=9606 GN=MYH14 PE=1 SV=2	240.022	218.707	196.695	271.215	231.204	242.229
B1AKJ5;O43847;O43847-2;G3V1R5	3	1	11.7907	0.160845	0.046544	1.79511	0.263618	PM54	CM55	140440	Nardilysin (N-arginine dibasic convertase)_ isoform CRA_d OS=Homo sapiens OX=9606 GN=NRDC PE=1 SV=1	132.257	473.385	99.372	386.114	448.59	430.874
REVERSE4263	3	1	10.4873	0.160907	0.046544	1.0921	0.263538	PM54	CM55	41445	Reversed Sequence 4263	2412.68	2251.42	2133.98	2347.06	2654.39	2422.7
O95872;A0A0G2JHL1;A0A0G2JK30;A0A0G2JK37	3	1	13.1593	0.161747	0.0467522	1.0927	0.262459	CM55	PM54	39542.2	G patch domain and ankyrin repeat-containing protein 1 OS=Homo sapiens OX=9606 GN=GPANK1 PE=1 SV=1	400.113	431.361	422.832	416.035	379.085	352.781
P04040	6	1	25.6059	0.16285	0.0470364	2.81727	0.261053	PM54	CM55	59984.4	Catalase OS=Homo sapiens OX=9606 GN=CAT PE=1 SV=3	336.028	13.3918	0	335.297	371.167	277.945
A6NHG4;B5MC82;P30046;P30046-2;J3KQ18	3	1	17.4694	0.163076	0.0470668	1.07186	0.260768	CM55	PM54	14423.4	D-dopachrome decarboxylase-like protein OS=Homo sapiens OX=9606 GN=DDTL PE=2 SV=1	1188.19	1355.48	1232.36	1165.01	1189.02	1168.87
P42704;A0A0C4DG06;B8ZZ38;C9JCA9	13	2	66.4195	0.163665	0.0472019	1.1862	0.260025	PM54	CM55	159103	Leucine-rich PPR motif-containing protein_ mitochondrial OS=Homo sapiens OX=9606 GN=LRPPRC PE=1 SV=3	201.554	192.572	183.742	210.493	271.842	203.131
REVERSE4703	3	2	10.7695	0.164391	0.0473765	1.41102	0.259114	PM54	CM55	94902.8	Reversed Sequence 4703	393.945	238.314	178.011	377.682	404.036	361.593
Q14683;G8JLG1;V9GY57	4	1	22.2015	0.164705	0.047432	1.90783	0.258722	CM55	PM54	143860	Structural maintenance of chromosomes protein 1A OS=Homo sapiens OX=9606 GN=SMC1A PE=1 SV=2	226.497	529.431	201.484	158.651	132.467	210.716
Q15819;G3V113;H0YBP9	3	1	19.086	0.165327	0.0475561	1.43995	0.257948	CM55	PM54	16419.8	Ubiquitin-conjugating enzyme E2 variant 2 OS=Homo sapiens OX=9606 GN=UBE2V2 PE=1 SV=4	500.319	288.874	465.174	232.465	295.981	342.675
REVERSE23141	5	1	20.8648	0.16538	0.0475561	2.56518	0.257883	PM54	CM55	150864	Reversed Sequence 23141	9.36724	85.4829	60.8972	80.1273	133.648	185.745
O60664;O60664-3;O60664-4;K7ERZ3;K7EL96;O60664-2;K7ER39	15	10	102.272	0.165551	0.047567	1.0669	0.257671	CM55	PM54	47246.1	Perilipin-3 OS=Homo sapiens OX=9606 GN=PLIN3 PE=1 SV=3	4649.31	4283.65	4608.23	3998	4376.39	4317.76
Q8NFC6;Q96IK1;Q96IK1-2	9	1	40.2241	0.165661	0.047567	1.92159	0.257535	PM54	CM55	332634	Biorientation of chromosomes in cell division protein 1-like 1 OS=Homo sapiens OX=9606 GN=BOD1L1 PE=1 SV=2	317.757	505.161	90.0454	549.133	584.938	620.266
Q155Q3;Q155Q3-2	4	1	16.1978	0.166808	0.0478611	1.38323	0.256124	CM55	PM54	77934.4	Dixin OS=Homo sapiens OX=9606 GN=DIXDC1 PE=1 SV=2	576.536	331.4	492.329	355.972	365.654	290.691
A0A1B0GVL3;Q05086;Q05086-2;Q05086-3	3	1	17.827	0.16751	0.0480272	1.20798	0.255268	PM54	CM55	94399.9	Ubiquitin-protein ligase E3A OS=Homo sapiens OX=9606 GN=UBE3A PE=1 SV=1	641.949	876.167	748.966	848.617	844.73	1045.25
REVERSE10198	8	1	34.7073	0.167838	0.0480861	1.88021	0.254869	PM54	CM55	165639	Reversed Sequence 10198	366.277	506.448	105.499	518.37	659.852	661.043
REVERSE21916	2	1	8.7173	0.168532	0.0482495	2.05104	0.25403	PM54	CM55	66007	Reversed Sequence 21916	37.9611	123.537	369.714	338.307	383.707	367.524
Q8WWI1;J3KP06;F8WD26;Q8WWI1-2;Q8WWI1-4;Q8WWI1-3;E9PMS6;E9PMP7;E9PMT2;A0A0A0MTE2;Q8WWI1-5;H0Y424;H0YDG6;H0YDQ3;H0YE95;E9PJ10;E9PK58;E9PLU6;E9PRJ0;U3KQE6	26	9	151.8	0.168846	0.0483041	1.06479	0.253651	PM54	CM55	194122	LIM domain only protein 7 OS=Homo sapiens OX=9606 GN=LMO7 PE=1 SV=3	6768.81	6887.9	7006.7	7321.46	6891.26	7789.44
P62913;P62913-2;Q5VVC8	5	4	31.8103	0.169189	0.0483668	1.12623	0.253239	PM54	CM55	20480.5	60S ribosomal protein L11 OS=Homo sapiens OX=9606 GN=RPL11 PE=1 SV=2	1703.3	1452.72	1857.24	1903.11	1922.24	1820.76
Q6GQQ9;Q6GQQ9-2	2	1	7.4676	0.169619	0.0484541	3.95281	0.252725	PM54	CM55	93210.3	OTU domain-containing protein 7B OS=Homo sapiens OX=9606 GN=OTUD7B PE=1 SV=1	48.8698	0	8.61842	112.709	25.3806	89.1503
Q12756;Q12756-2;Q12756-3;F8W8V9;H7C0K6	13	1	59.6732	0.170692	0.048725	2.12199	0.251449	PM54	CM55	192661	Kinesin-like protein KIF1A OS=Homo sapiens OX=9606 GN=KIF1A PE=1 SV=2	160.809	41.5381	11.6683	146.785	161.4	145.952
P49257	2	1	9.4882	0.170967	0.048768	1.28522	0.251124	CM55	PM54	57834.2	Protein ERGIC-53 OS=Homo sapiens OX=9606 GN=LMAN1 PE=1 SV=2	211.859	191.894	152.123	154.651	164.973	112.891
Q00325;Q00325-2;F8VVM2;F8VWQ0;F8VWR4;F8VZL5	7	4	46.6501	0.172348	0.0491262	1.06516	0.249502	CM55	PM54	40551.2	Phosphate carrier protein_ mitochondrial OS=Homo sapiens OX=9606 GN=SLC25A3 PE=1 SV=2	2773.09	2849.08	3134.76	2735.55	2744.74	2740.91
P25054;P25054-2;P25054-3;A0A2Q2SV78;E9PFT7;E7EMH9;D6RFL6;R4GMU6	18	2	97.9873	0.172838	0.0492298	1.36663	0.248932	PM54	CM55	313813	Adenomatous polyposis coli protein OS=Homo sapiens OX=9606 GN=APC PE=1 SV=2	123.023	104.899	208.254	200.03	180.06	216.001
REVERSE17018	3	1	12.7865	0.173377	0.0493472	1.65291	0.248307	CM55	PM54	55502	Reversed Sequence 17018	189.564	382.492	427.764	196.302	168.583	240.001
O14579;M0QXB4;O14579-2;M0R061;O14579-3	5	2	27.3148	0.173596	0.0493739	1.17574	0.248053	CM55	PM54	34710.2	Coatomer subunit epsilon OS=Homo sapiens OX=9606 GN=COPE PE=1 SV=3	216.911	217.413	278.871	184.583	208.323	213.689
REVERSE1635	8	1	31.1612	0.174467	0.0495481	1.35701	0.247051	CM55	PM54	249572	Reversed Sequence 1635	626.724	500.231	634.728	549.011	456.121	293.08
REVERSE24171	8	1	32.7731	0.17455	0.0495481	1.38721	0.246956	PM54	CM55	216336	Reversed Sequence 24171	343.723	189.659	168.504	291.276	353.118	329.269
REVERSE27399	4	1	16.0917	0.174589	0.0495481	1.41001	0.246911	CM55	PM54	111788	Reversed Sequence 27399	831.311	743.311	887.128	719.008	676.938	349.964
REVERSE23038	2	1	8.437	0.175327	0.0496913	2.91845	0.246069	PM54	CM55	78488	Reversed Sequence 23038	0	12.9628	100.088	117.063	112.419	100.453
Q9H299;Q5T123	4	3	30.3872	0.175348	0.0496913	1.11301	0.246045	CM55	PM54	10494.8	SH3 domain-binding glutamic acid-rich-like protein 3 OS=Homo sapiens OX=9606 GN=SH3BGRL3 PE=1 SV=1	2339	2331.71	1970.69	1913.86	1948.12	2105.09
Q9Y5S2;H0YLY0	10	1	53.4468	0.177817	0.0503542	1.454	0.243265	CM55	PM54	196312	Serine/threonine-protein kinase MRCK beta OS=Homo sapiens OX=9606 GN=CDC42BPB PE=1 SV=2	286.775	334.528	237.428	145.378	300.042	145.18
Q52LW3	8	1	30.9838	0.178115	0.0504022	4.20589	0.242932	PM54	CM55	143604	Rho GTPase-activating protein 29 OS=Homo sapiens OX=9606 GN=ARHGAP29 PE=1 SV=2	54.0949	83.0562	0	155.717	206.265	214.86
REVERSE2254	4	1	18.6409	0.178675	0.050524	1.14944	0.242311	PM54	CM55	148969	Reversed Sequence 2254	872.561	1078.68	1135.43	1133.74	1143.45	1270.74
Q99973;G3V5X7;Q99973-2;G3V470;G3V2A4;H0YIY9;H0YIZ2	14	1	72.7506	0.179118	0.0506126	1.39637	0.241822	PM54	CM55	293684	Telomerase protein component 1 OS=Homo sapiens OX=9606 GN=TEP1 PE=1 SV=2	351.08	429.262	218.66	411.733	559.379	423.86
REVERSE12900	4	1	16.874	0.179544	0.0506964	2.52065	0.241353	CM55	PM54	140388	Reversed Sequence 12900	318.871	90.1731	369.477	146.526	71.1758	91.1555
E9PGC8;P78559;P78559-2	17	1	91.1584	0.180318	0.0508532	1.0716	0.240505	PM54	CM55	332912	Microtubule-associated protein 1A OS=Homo sapiens OX=9606 GN=MAP1A PE=1 SV=1	544.944	498.238	485.378	532.859	573.595	531.555
Q6PIF6;Q6PIF6-2;B9A063	15	1	73.1818	0.180359	0.0508532	1.27342	0.240459	PM54	CM55	243767	Unconventional myosin-VIIb OS=Homo sapiens OX=9606 GN=MYO7B PE=1 SV=2	106.496	78.3348	92.8145	139.75	93.9307	119.877
C9J4Z3;P61513;E9PEL3;M0R0A1;M0R2L6;Q6P4E4	2	1	13.2511	0.182139	0.051318	1.09901	0.23853	CM55	PM54	7852.17	60S ribosomal protein L37a OS=Homo sapiens OX=9606 GN=RPL37A PE=1 SV=1	1250.46	1233.3	1134.54	1141.85	988.461	1162.01
REVERSE19443	14	2	56.8978	0.183005	0.0515248	1.56866	0.237602	PM54	CM55	384125	Reversed Sequence 19443	144.573	56.4818	48.0085	127.8	112.404	150.489
B7Z863;B7Z964;H7BZK0;H7BZW9;H7C3M8;Q14BN4;Q14BN4-2;Q14BN4-3;Q14BN4-4;Q14BN4-5;Q14BN4-8	1	1	4.0954	0.183849	0.0517158	1.1711	0.236703	PM54	CM55	37416.2	Sarcolemmal membrane-associated protein OS=Homo sapiens OX=9606 GN=SLMAP PE=1 SV=1	674.215	777.648	913.753	887.389	864.08	1018.9
P35221;P35221-2;G3XAM7;P35221-3;E5RIB1;E5RFM5;E5RG03;E5RGD2;E5RGY6;E5RHV7;E5RJ41;E5RJP7;E5RFG3;E5RFK9;E5RFM3;E5RIE0;E5RJL0;H0YBB8	16	3	92.0321	0.183948	0.0517158	1.12904	0.236598	CM55	PM54	100756	Catenin alpha-1 OS=Homo sapiens OX=9606 GN=CTNNA1 PE=1 SV=1	404.951	462.379	508.066	381.532	427.493	409.17
Q6N069	2	1	7.8304	0.184762	0.051898	2.32618	0.235738	PM54	CM55	102489	N-alpha-acetyltransferase 16_ NatA auxiliary subunit OS=Homo sapiens OX=9606 GN=NAA16 PE=1 SV=2	55.2509	8.08183	85.1349	100.947	85.395	159.021
Q9BTV4	1	1	5.404	0.184979	0.051898	2.90873	0.235509	PM54	CM55	44932.7	Transmembrane protein 43 OS=Homo sapiens OX=9606 GN=TMEM43 PE=1 SV=1	8.30302	0	47.1188	35.9684	82.5309	42.7076
Q96AG4	9	7	38.8481	0.185027	0.051898	1.0435	0.235458	PM54	CM55	35329.7	Leucine-rich repeat-containing protein 59 OS=Homo sapiens OX=9606 GN=LRRC59 PE=1 SV=1	1008.63	948.592	1000.25	1016.8	1003.19	1066.13
A6NIZ1;P61224;P61224-3;B7ZB78;E7ESV4;F5GZG1;F5H7Y6;F5H823;P61224-2;P61224-4;F5GX62;F5H004;F5H6R7;A0A075B6Q0;F5GWU8;F5GYB5;F5GYH7;F5H077;F5H0B7;F5H491;F5H4H0;F5H500;F8WBC0	4	1	25.5377	0.185127	0.051898	1.25237	0.235354	CM55	PM54	21153	Ras-related protein Rap-1b-like protein OS=Homo sapiens OX=9606 PE=2 SV=1	1189.72	981.427	1412.93	1063.2	1006.91	791.724
A0A087WT25;O00294;O00294-2	3	1	13.0839	0.185636	0.0520034	1.35035	0.23482	PM54	CM55	60638.4	Tubby-like protein OS=Homo sapiens OX=9606 GN=TULP1 PE=1 SV=1	58.2925	86.2707	56.2619	102.714	100.117	68.3526
P00451	18	2	70.5461	0.186387	0.0521763	1.03129	0.234037	CM55	PM54	268493	Coagulation factor VIII OS=Homo sapiens OX=9606 GN=F8 PE=1 SV=1	1066.39	1128.6	1069.3	1055.34	1064.21	1045.69
J3KRL7;J3KSL6;J3KTM2;J3QL55;J3QSH9;O15534;O15534-4	1	1	4.5186	0.186588	0.0521953	1.77209	0.233828	PM54	CM55	135195	Period circadian protein homolog 1 OS=Homo sapiens OX=9606 GN=PER1 PE=1 SV=1	68.5211	271.16	291.034	388.198	347.565	381.917
Q53GS7;Q53GS7-2	6	1	33.0765	0.188827	0.0527838	1.19662	0.231524	PM54	CM55	80406.6	Nucleoporin GLE1 OS=Homo sapiens OX=9606 GN=GLE1 PE=1 SV=2	457.765	436.443	320.423	463.271	527.247	462.933
P46108;P46108-2;I3L297	3	1	17.4632	0.189096	0.052821	1.39649	0.23125	CM55	PM54	33887.8	Adapter molecule crk OS=Homo sapiens OX=9606 GN=CRK PE=1 SV=2	202.483	362.28	256.466	179.769	168.553	239.742
A0A087X1V8;Q7RTZ1	2	1	8.4098	0.189239	0.0528234	3.582	0.231104	PM54	CM55	63722.1	Ovochymase-2 OS=Homo sapiens OX=9606 GN=OVCH2 PE=1 SV=2	27.3961	0	102.193	165.934	87.0289	211.227
A0A0A0MR45;A0A0C4DGB5;B7Z574;E7EQ12;E7EQA0;E7ES10;E7EVY3;E9PCH5;E9PDE4;H0Y7F0;H0Y9H6;H0YD33;P20810;P20810-10;P20810-2;P20810-3;P20810-4;P20810-5;P20810-6;P20810-7;P20810-8;P20810-9;D6RAA8;D6RC54;F8W7E0	3	1	19.9511	0.190982	0.0532611	1.27897	0.229345	CM55	PM54	47442.1	Calpastatin OS=Homo sapiens OX=9606 GN=CAST PE=1 SV=1	349.046	427.858	352.81	245.471	392.494	245.332
P61970;H3BRV9	3	1	19.8019	0.19108	0.0532611	4.19596	0.229246	PM54	CM55	14649.6	Nuclear transport factor 2 OS=Homo sapiens OX=9606 GN=NUTF2 PE=1 SV=1	94.2543	0	118.243	243.345	324.005	324.279
REVERSE27523	4	1	16.5296	0.191389	0.0533092	1.36277	0.228937	PM54	CM55	78075.3	Reversed Sequence 27523	118.925	165.025	261.131	256.224	233.539	253.055
REVERSE20079	13	1	63.1314	0.192541	0.053592	1.22859	0.22779	PM54	CM55	53708.8	Reversed Sequence 20079	544.913	533.688	370.967	652.715	598.289	529.92
REVERSE27823	3	1	12.8392	0.192709	0.0536004	1.19339	0.227625	PM54	CM55	76663.7	Reversed Sequence 27823	974.534	640.552	757.474	925.666	963.765	941.965
O60563	2	1	8.7373	0.193454	0.053749	2.89629	0.226889	PM54	CM55	81083.9	Cyclin-T1 OS=Homo sapiens OX=9606 GN=CCNT1 PE=1 SV=1	15.2849	93.9487	0	88.1905	76.0097	152.172
REVERSE35067	9	2	36.8201	0.193518	0.053749	1.17199	0.226826	CM55	PM54	248828	Reversed Sequence 35067	779.087	735.98	989.534	726.085	665.268	745.695
A0A087X2D0;P84103;P84103-2	3	1	26.4872	0.195473	0.0542534	1.51944	0.224919	PM54	CM55	10605.7	Serine/arginine-rich-splicing factor 3 OS=Homo sapiens OX=9606 GN=SRSF3 PE=1 SV=1	106.323	48.4535	144.986	138.02	153.631	163.818
F8WA11;Q7Z460;Q7Z460-2;Q7Z460-3;Q7Z460-4;Q7Z460-5;H0Y5T1;C9J151;C9JP76	9	1	46.9894	0.195919	0.0543387	1.2731	0.224487	PM54	CM55	163728	CLIP-associating protein 1 OS=Homo sapiens OX=9606 GN=CLASP1 PE=1 SV=2	220.935	217.826	353.136	352.949	359.137	296.08
Q5VZL5;Q5VZL5-2;Q5VZL5-4;A0A0A0MSN3	2	1	15.1032	0.196134	0.0543596	3.16387	0.22428	PM54	CM55	176267	Zinc finger MYM-type protein 4 OS=Homo sapiens OX=9606 GN=ZMYM4 PE=1 SV=1	0	62.2045	21.1047	111.328	91.8503	60.4012
A6NFX8;Q9UKK9;A6NCQ0;A6NJU6;H0YEY4	2	1	10.8227	0.197122	0.0545949	1.73932	0.223331	PM54	CM55	26180.7	ADP-sugar pyrophosphatase OS=Homo sapiens OX=9606 GN=NUDT5 PE=1 SV=1	117.256	45.7992	26.8071	77.6742	115.957	136.6
Q9BYK8;Q9BYK8-2;Q9BYK8-4	10	1	42.614	0.197494	0.0546591	2.29967	0.222976	PM54	CM55	298472	Helicase with zinc finger domain 2 OS=Homo sapiens OX=9606 GN=HELZ2 PE=1 SV=6	9.34551	139.283	0	134.858	70.6985	136.24
Q9UFH2;K7EK91	18	4	81.7347	0.198212	0.0548189	1.20939	0.222294	PM54	CM55	513078	Dynein heavy chain 17_ axonemal OS=Homo sapiens OX=9606 GN=DNAH17 PE=1 SV=3	209.54	191.712	279.142	246.286	305.582	270.995
REVERSE41240	2	1	7.9803	0.198696	0.0548502	1.11513	0.221835	PM54	CM55	192959	Reversed Sequence 41240	1906.25	1513.05	1656.95	1792.32	1982.46	1885.92
D6R905;D6RIY6;H0Y9L5;Q06265;Q06265-2;Q06265-3;Q06265-4	2	1	9.7902	0.198704	0.0548502	1.20759	0.221828	CM55	PM54	26228.2	Exosome complex component RRP45 (Fragment) OS=Homo sapiens OX=9606 GN=EXOSC9 PE=1 SV=1	512.966	628.154	755.252	500.988	550.3	519.083
Q5M9N0	2	1	12.0918	0.198773	0.0548502	1.17084	0.221762	PM54	CM55	127654	Coiled-coil domain-containing protein 158 OS=Homo sapiens OX=9606 GN=CCDC158 PE=2 SV=2	939.055	1030.33	1052.05	1094.71	1400.35	1042.57
A0A0C4DFN3;E7EWX8;H7C599;Q99685;Q99685-2;H7C4E0	2	1	10.6081	0.198886	0.0548502	2.89846	0.221655	PM54	CM55	34520.7	Monoglyceride lipase OS=Homo sapiens OX=9606 GN=MGLL PE=1 SV=1	158.565	2.6656	99.1054	262.518	244.442	247.613
O95340;O95340-2	7	3	25.3253	0.201116	0.0554259	1.19204	0.219569	CM55	PM54	70071.1	Bifunctional 3'-phosphoadenosine 5'-phosphosulfate synthase 2 OS=Homo sapiens OX=9606 GN=PAPSS2 PE=1 SV=2	241.995	245.928	324.538	225.442	250.439	205.692
P62140;P62136;P62136-2;F8VYE8;F8W0W8;P36873;P36873-2;P62136-3;E9PMD7;F8VR82;C9J9S3;C9JP48;E7ETD8;A0A087WYY5;F5H037;F5H1L6;F8W1A0;F8WE71;H0Y3Y6	9	6	67.0472	0.201649	0.0555338	1.08895	0.219075	CM55	PM54	37985.3	Serine/threonine-protein phosphatase PP1-beta catalytic subunit OS=Homo sapiens OX=9606 GN=PPP1CB PE=1 SV=3	2575.17	2847.17	2736.67	2660.54	2265.31	2566.66
REVERSE38961	3	1	9.1689	0.202956	0.0558198	123.198	0.217873	CM55	PM54	128435	Reversed Sequence 38961	371.549	0	66.9848	3.55959	0	0
REVERSE34500	2	1	8.3396	0.202973	0.0558198	1.64674	0.217857	CM55	PM54	59445.6	Reversed Sequence 34500	189.168	76.5605	151.612	98.2231	69.8182	85.3926
Q96QP1;Q96QP1-2;B3KUH8	5	2	21.1075	0.20355	0.055939	1.52983	0.217331	PM54	CM55	140287	Alpha-protein kinase 1 OS=Homo sapiens OX=9606 GN=ALPK1 PE=2 SV=3	73.8403	182.579	232.213	263.321	247.171	237.031
Q92616	17	1	68.6972	0.20389	0.0559932	3.16362	0.217021	CM55	PM54	295154	eIF-2-alpha kinase activator GCN1 OS=Homo sapiens OX=9606 GN=GCN1 PE=1 SV=6	72.3371	129.564	63.6015	60.888	23.0357	0
REVERSE26966	6	1	34.6015	0.204288	0.0560628	1.83382	0.21666	PM54	CM55	101865	Reversed Sequence 26966	755.952	106.834	437.301	829.502	796.392	758.233
P62888;E5RI99;A0A0B4J213;A0A0C4DH44;E5RJH3	8	7	40.2425	0.205754	0.0564028	1.02955	0.215339	CM55	PM54	12955.2	60S ribosomal protein L30 OS=Homo sapiens OX=9606 GN=RPL30 PE=1 SV=2	6923.63	7014	7254.34	6873.62	6696.89	7013.26
Q99698;Q99698-2;A0A0A0MRZ6;Q99698-3	7	1	30.4907	0.206064	0.0564028	1.45506	0.215061	PM54	CM55	434443	Lysosomal-trafficking regulator OS=Homo sapiens OX=9606 GN=LYST PE=1 SV=3	119.101	194.275	66.9437	184.077	192.594	176.717
Q8IZP2;H7C3I1;F6VDH7	7	1	37.4847	0.20608	0.0564028	1.51216	0.215047	PM54	CM55	27577.9	Putative protein FAM10A4 OS=Homo sapiens OX=9606 GN=ST13P4 PE=5 SV=1	79.6498	45.7638	155.139	135.364	136.74	152.137
H0Y3Q9;Q32MH5;Q32MH5-2;Q32MH5-3	5	1	19.5628	0.206151	0.0564028	1.49618	0.214983	CM55	PM54	106937	Protein FAM214A (Fragment) OS=Homo sapiens OX=9606 GN=FAM214A PE=1 SV=2	239.738	195.179	365.357	138.252	254.908	141.719
M0R1E3;Q8WUY8	1	1	5.0945	0.206248	0.0564028	1.68679	0.214897	CM55	PM54	17787.7	N-acetyltransferase 14 (Fragment) OS=Homo sapiens OX=9606 GN=NAT14 PE=1 SV=1	528.758	307.264	195.744	204.906	178.903	227.864
Q9BRA2;I3L0K2;I3L3M7	4	2	22.0937	0.207164	0.0566137	1.10018	0.214081	CM55	PM54	14226	Thioredoxin domain-containing protein 17 OS=Homo sapiens OX=9606 GN=TXNDC17 PE=1 SV=1	981.614	1008.15	863.66	885.525	796.045	912.022
REVERSE18910	6	1	27.8042	0.207497	0.0566651	1.1346	0.213786	PM54	CM55	254382	Reversed Sequence 18910	2466.84	2074.12	1821.57	2389.82	2475.19	2353.93
REVERSE30016	12	1	53.2221	0.208435	0.0568584	1.26866	0.212958	PM54	CM55	279016	Reversed Sequence 30016	196.734	159.821	225.321	241.178	299.271	197.757
A0A1W2PQS1;P35998;P35998-2;C9JLS9	5	2	36.3999	0.20853	0.0568584	1.05603	0.212875	PM54	CM55	45259.9	26S proteasome regulatory subunit 7 OS=Homo sapiens OX=9606 GN=PSMC2 PE=1 SV=1	3463.24	3657.08	3789.74	3648.53	3935.9	3936.95
Q92835;Q92835-2;Q92835-3;H0Y5Q9	11	2	49.9958	0.208641	0.0568584	1.12926	0.212777	CM55	PM54	134205	Phosphatidylinositol 3_4_5-trisphosphate 5-phosphatase 1 OS=Homo sapiens OX=9606 GN=INPP5D PE=1 SV=2	420.768	471.756	367.377	374.696	351.355	389.639
Q9BSJ8;Q9BSJ8-2;F8VZB1	9	3	52.9733	0.209413	0.0570289	1.06543	0.212102	CM55	PM54	123370	Extended synaptotagmin-1 OS=Homo sapiens OX=9606 GN=ESYT1 PE=1 SV=1	1147.02	1008.32	1114.1	1007.05	1052.19	1009.43
Q9NZJ4;Q9NZJ4-2;H0Y6M8	38	4	154.387	0.209747	0.0570802	1.12303	0.211811	CM55	PM54	526830	Sacsin OS=Homo sapiens OX=9606 GN=SACS PE=1 SV=2	1981.24	1670.53	1548.02	1569.32	1559.29	1501.53
Q15181;Q5SQT6	4	3	21.2969	0.210076	0.0571299	1.03395	0.211525	PM54	CM55	33116.3	Inorganic pyrophosphatase OS=Homo sapiens OX=9606 GN=PPA1 PE=1 SV=2	1905.36	1820.56	1904.36	1982.53	1960.71	1878.18
P35913;P35913-2;P35913-3	6	1	24.9069	0.210526	0.0572122	1.06723	0.211135	PM54	CM55	99533.6	Rod cGMP-specific 3'_5'-cyclic phosphodiesterase subunit beta OS=Homo sapiens OX=9606 GN=PDE6B PE=1 SV=2	2626.02	2756.83	2510.73	2723.48	3001.33	2699.45
Q6VY07;B4DF77;Q6VY07-2	2	1	8.8986	0.210812	0.0572504	1.13977	0.210887	CM55	PM54	105298	Phosphofurin acidic cluster sorting protein 1 OS=Homo sapiens OX=9606 GN=PACS1 PE=1 SV=2	311.698	320.47	267.56	265.235	293.158	231.003
O00232;O00232-2	9	2	44.2436	0.211583	0.0574198	1.11709	0.210223	CM55	PM54	53303.7	26S proteasome non-ATPase regulatory subunit 12 OS=Homo sapiens OX=9606 GN=PSMD12 PE=1 SV=3	333.945	382.764	418.37	357.808	336.183	322.11
P45877	2	1	11.6783	0.213113	0.0577747	1.09893	0.208915	CM55	PM54	22877.4	Peptidyl-prolyl cis-trans isomerase C OS=Homo sapiens OX=9606 GN=PPIC PE=1 SV=1	1826.12	2143.37	2172.91	1966.3	1820.62	1802.54
P61160;P61160-2;F5H6T1	14	6	66.3856	0.213187	0.0577747	1.07241	0.208853	CM55	PM54	45046	Actin-related protein 2 OS=Homo sapiens OX=9606 GN=ACTR2 PE=1 SV=1	4617.24	3992.06	4401.56	3940.62	4011.59	4180.15
Q9BQN1	2	1	8.6023	0.213691	0.0578713	1.50964	0.208425	PM54	CM55	81590.9	Protein FAM83C OS=Homo sapiens OX=9606 GN=FAM83C PE=1 SV=3	263.132	82.7804	131.303	243.545	199.206	277.672
E9PKG1;Q99873;Q99873-2;Q99873-3;Q99873-5;E9PIX6;E9PQ98;E9PNR9;H0YDE4;E9PMW9	9	1	60.2879	0.213934	0.0578969	2.60755	0.20822	PM54	CM55	38222.7	Protein arginine N-methyltransferase 1 OS=Homo sapiens OX=9606 GN=PRMT1 PE=1 SV=1	9.55115	305.945	381.956	633.56	556.09	628.99
Q15386;Q15386-2	4	1	16.7682	0.214132	0.0579105	1.51304	0.208052	CM55	PM54	125006	Ubiquitin-protein ligase E3C OS=Homo sapiens OX=9606 GN=UBE3C PE=1 SV=3	129.883	230.619	103.013	106.581	98.0049	101.761
Q9ULJ6;A0A087WYE6	3	1	20.667	0.214603	0.0579975	3.10316	0.207656	PM54	CM55	116510	Zinc finger MIZ domain-containing protein 1 OS=Homo sapiens OX=9606 GN=ZMIZ1 PE=1 SV=3	0	50.1224	164.628	168.806	256.935	240.664
Q8IZ07;S4R3D2	5	1	23.4827	0.215027	0.0580126	3.01282	0.2073	PM54	CM55	68018.4	Ankyrin repeat domain-containing protein 13A OS=Homo sapiens OX=9606 GN=ANKRD13A PE=1 SV=3	0	40.2561	41.9839	87.3777	74.4428	85.9538
REVERSE449	13	1	61.1165	0.215059	0.0580126	2.28495	0.207274	PM54	CM55	158354	Reversed Sequence 449	115.923	119.476	7.52063	152.55	220.807	181.701
Q12802;Q12802-2;Q12802-4;A0A087WTD7;A8MYJ1;H0YMW2;A0A087WY36	11	1	45.0392	0.215107	0.0580126	1.1539	0.207233	CM55	PM54	310573	A-kinase anchor protein 13 OS=Homo sapiens OX=9606 GN=AKAP13 PE=1 SV=2	1289.8	1291.76	1364.62	1285.09	922.337	1212.44
P49748;P49748-2;P49748-3;G3V1M7;J3QRJ8;J3KSR4;K7EQP4;J3QKU9	11	6	67.1378	0.215399	0.0580126	1.14593	0.206988	CM55	PM54	70789.5	Very long-chain specific acyl-CoA dehydrogenase_ mitochondrial OS=Homo sapiens OX=9606 GN=ACADVL PE=1 SV=1	2167.79	2148.92	1664.3	1788.04	1706.87	1724.44
Q5TB80;Q5TB80-2	7	2	29.3026	0.215401	0.0580126	1.25293	0.206987	PM54	CM55	162457	Centrosomal protein of 162 kDa OS=Homo sapiens OX=9606 GN=CEP162 PE=1 SV=2	135.127	198.566	226.286	206.208	249.471	245.935
P62745	1	1	10.5626	0.215872	0.0580994	2.33581	0.206594	CM55	PM54	22579.6	Rho-related GTP-binding protein RhoB OS=Homo sapiens OX=9606 GN=RHOB PE=1 SV=1	472.524	107.591	366.213	121.552	156.599	126.988
O14529;F5GWR6	12	2	51.9213	0.216423	0.0582078	1.38448	0.206135	PM54	CM55	162190	Homeobox protein cut-like 2 OS=Homo sapiens OX=9606 GN=CUX2 PE=1 SV=4	275.616	144.084	113.511	269.649	242.547	226.024
REVERSE19140	9	1	41.0981	0.218064	0.0586086	1.32789	0.204781	CM55	PM54	442049	Reversed Sequence 19140	223.643	207.827	128.748	148.609	135.127	138.15
E7EMS6;P21964;P21964-2;E7EUU8;F8WBW9	2	1	14.4488	0.218214	0.0586086	1.06833	0.204659	PM54	CM55	25180.5	Catechol O-methyltransferase (Fragment) OS=Homo sapiens OX=9606 GN=COMT PE=1 SV=1	1877.7	1737.45	1693.98	2016.79	1834.61	1820.52
Q9NYL5;A0A087WTD2	2	1	17.0998	0.220246	0.0591139	1.10183	0.203005	CM55	PM54	54686.1	24-hydroxycholesterol 7-alpha-hydroxylase OS=Homo sapiens OX=9606 GN=CYP39A1 PE=2 SV=2	1567.71	1495.48	1399.86	1345.62	1492.94	1212.03
Q13349	1	1	3.6513	0.220758	0.0592107	3.10034	0.202592	CM55	PM54	128013	Integrin alpha-D OS=Homo sapiens OX=9606 GN=ITGAD PE=1 SV=2	240.529	244.383	87.6758	129.713	53.9688	1.00355
O94822;H7BYG8;O94822-3	4	1	14.5737	0.220953	0.0592222	1.22586	0.202435	PM54	CM55	203233	E3 ubiquitin-protein ligase listerin OS=Homo sapiens OX=9606 GN=LTN1 PE=1 SV=6	243.435	143.675	167.233	221.73	223.105	234.713
P46060;H0Y4Q3	7	1	32.7703	0.222483	0.0595915	1.14941	0.201211	PM54	CM55	63998.3	Ran GTPase-activating protein 1 OS=Homo sapiens OX=9606 GN=RANGAP1 PE=1 SV=1	379.163	507.095	450.844	561.57	506.996	468.309
P0CG38	15	1	171.231	0.223032	0.0596976	1.70274	0.200775	PM54	CM55	122936	POTE ankyrin domain family member I OS=Homo sapiens OX=9606 GN=POTEI PE=3 SV=1	23.8667	183.157	54.9012	125.356	174.049	146.584
P31939;P31939-2;F8WEF0;C9JLK0	8	5	50.7881	0.225629	0.0603515	1.04849	0.198735	CM55	PM54	65129.2	Bifunctional purine biosynthesis protein PURH OS=Homo sapiens OX=9606 GN=ATIC PE=1 SV=3	1133.2	1124.29	1185.84	1032.29	1120.46	1131.34
REVERSE24207	5	1	19.7364	0.226186	0.060459	2.15404	0.198303	PM54	CM55	140703	Reversed Sequence 24207	0	73.8453	10.7072	73.5935	44.1879	64.3479
Q8TDW7;Q8TDW7-1;E9PQ73;G5EA25	23	3	113.554	0.226459	0.0604906	1.17335	0.198091	PM54	CM55	505458	Protocadherin Fat 3 OS=Homo sapiens OX=9606 GN=FAT3 PE=2 SV=3	556.87	417.705	471.713	534.751	652.834	509.421
REVERSE4505	2	1	8.3385	0.229258	0.0611966	1.42309	0.195945	PM54	CM55	98531.9	Reversed Sequence 4505	113.537	242.163	316.435	313.841	304.449	338.216
O15254	3	1	11.3742	0.229612	0.0612491	1.18902	0.195676	CM55	PM54	78370.5	Peroxisomal acyl-coenzyme A oxidase 3 OS=Homo sapiens OX=9606 GN=ACOX3 PE=1 SV=2	592.383	441.169	620.888	451.611	435.085	504.734
REVERSE33174	5	1	20.9421	0.231276	0.0616509	1.24453	0.194422	PM54	CM55	302298	Reversed Sequence 33174	536.449	533.104	346.043	649.369	611.552	500.829
P61019;E9PKL7;P61019-2;H7C125;E9PE37;H0YD31;H0YDL5	6	1	41.1486	0.231524	0.061675	1.05579	0.194237	CM55	PM54	23716.7	Ras-related protein Rab-2A OS=Homo sapiens OX=9606 GN=RAB2A PE=1 SV=1	2181.21	1989.66	2110.73	1905.97	2090.44	1953.25
H0Y5J9	6	1	26.6561	0.232388	0.0618534	1.27437	0.193592	CM55	PM54	34449.4	TRIO and F-actin-binding protein (Fragment) OS=Homo sapiens OX=9606 GN=TRIOBP PE=1 SV=1	131.246	216.127	196.036	131.06	148.615	146.739
Q8ND30;Q8ND30-2;E9PP16;Q8ND30-3;H0YDJ2	3	1	12.8751	0.232569	0.0618534	1.19563	0.193458	PM54	CM55	99114.1	Liprin-beta-2 OS=Homo sapiens OX=9606 GN=PPFIBP2 PE=1 SV=3	1215.32	861.115	929.341	1069.23	1386.76	1137.8
REVERSE28187	7	1	35.3412	0.232669	0.0618534	3.34228	0.193384	PM54	CM55	224534	Reversed Sequence 28187	132.158	108.388	0	184.511	383.296	236.167
P49458;E9PE20;P49458-2	3	1	25.3417	0.235033	0.0624395	1.30981	0.191642	PM54	CM55	10225.8	Signal recognition particle 9 kDa protein OS=Homo sapiens OX=9606 GN=SRP9 PE=1 SV=2	186.777	125.983	110.322	143.668	191.786	218.702
F5H7P7;Q96BP3;D6R9Q1;D6RB19;D6RHV0;H0Y8N5;Q96BP3-2	2	1	9.6603	0.235868	0.0626187	1.63566	0.191034	PM54	CM55	70846.9	Peptidylprolyl isomerase domain and WD repeat-containing protein 1 OS=Homo sapiens OX=9606 GN=PPWD1 PE=1 SV=1	49.0326	23.6026	79.5481	98.1697	52.9017	97.8483
P48378;P48378-2	4	1	14.7276	0.238636	0.0633107	1.2416	0.189041	PM54	CM55	80386.6	DNA-binding protein RFX2 OS=Homo sapiens OX=9606 GN=RFX2 PE=1 SV=2	83.0241	101.33	124.749	120.678	108.304	154.799
P09497;P09497-2;D6RJD1	3	1	15.6525	0.243039	0.0644349	1.20076	0.185944	CM55	PM54	25304.6	Clathrin light chain B OS=Homo sapiens OX=9606 GN=CLTB PE=1 SV=1	1171.43	803.593	908.82	711.015	808.729	881.942
Q8NFA0;K7EKZ1;K7EQL6;Q8NFA0-2	4	1	18.0179	0.244628	0.0648122	1.16881	0.184847	PM54	CM55	183937	Ubiquitin carboxyl-terminal hydrolase 32 OS=Homo sapiens OX=9606 GN=USP32 PE=1 SV=1	413.392	331.734	272.971	422.321	388.232	379.408
O95602;B9ZVN9	8	1	37.3627	0.244963	0.064857	1.29029	0.184618	PM54	CM55	196808	DNA-directed RNA polymerase I subunit RPA1 OS=Homo sapiens OX=9606 GN=POLR1A PE=1 SV=2	818.846	693.161	396.64	828.703	793.644	840.356
Q8NDV7;Q8NDV7-2;Q8NDV7-5;Q8NDV7-6;H7C269	4	1	23.6969	0.24766	0.0655268	1.40275	0.182786	CM55	PM54	211096	Trinucleotide repeat-containing gene 6A protein OS=Homo sapiens OX=9606 GN=TNRC6A PE=1 SV=2	145.437	293.427	242.958	170.443	137.709	177.907
REVERSE23796	3	1	16.0871	0.249016	0.0658409	1.86334	0.181877	PM54	CM55	83999	Reversed Sequence 23796	26.9328	270.392	242.97	297.89	338.753	370.112
Q8IWI9;Q8IWI9-3;Q8IWI9-4;H3BU53;Q8IWI9-2;H3BP52;H3BTF4	12	1	55.4102	0.249234	0.065854	2.92677	0.181732	PM54	CM55	334004	MAX gene-associated protein OS=Homo sapiens OX=9606 GN=MGA PE=1 SV=3	0	199.599	135.759	373.401	270.317	337.798
I3NI22;P51688	1	1	4.5414	0.24992	0.0659906	2.22601	0.181276	PM54	CM55	21716.6	N-sulphoglucosamine sulphohydrolase (Fragment) OS=Homo sapiens OX=9606 GN=SGSH PE=1 SV=1	111.508	17.9369	0	65.4252	157.085	65.6348
Q8TDX7;F8WAG2;Q8TDX7-2;F5H3U7	4	1	23.2758	0.252494	0.0666254	2.28517	0.179581	CM55	PM54	35007.3	Serine/threonine-protein kinase Nek7 OS=Homo sapiens OX=9606 GN=NEK7 PE=1 SV=1	271.987	121.088	56.8239	50.2746	39.7983	106.805
A0A0D9SF53;A0A0D9SFB3;A0A0D9SG12;A0A2R8Y4A4;A0A2R8Y5G6;A0A2R8Y645;A0A2R8YCW1;A0A2R8YF78;A0A2R8YFR4;A0A2R8YFS5;A0A2U3TZJ9;F6S8Q4;O00571;O00571-2;A0A2R8Y7T2;A0A2R8YDT5;O15523;O15523-2;A0A2R8YDH3;A0A087WVZ1;A0A0J9YVQ7;A0A2R8Y650;A0A2R8YCU0;C9J081;C9J8G5;O15523-3	9	4	61.2891	0.253749	0.0669112	1.1403	0.178765	CM55	PM54	82161.5	ATP-dependent RNA helicase DDX3X OS=Homo sapiens OX=9606 GN=DDX3X PE=1 SV=1	369.716	334.63	418.26	287.114	373.666	323.702
O00469;O00469-2;E7ETU9;C9JXZ0;O00469-3	24	15	158.274	0.255746	0.0673923	1.04413	0.177479	CM55	PM54	85427.1	Procollagen-lysine_2-oxoglutarate 5-dioxygenase 2 OS=Homo sapiens OX=9606 GN=PLOD2 PE=1 SV=2	5444.57	5695.3	5263.63	5208.63	5040.43	5461.2
P52333;P52333-2;P52333-4	2	1	8.2445	0.257094	0.0677018	2.25435	0.17662	PM54	CM55	126924	Tyrosine-protein kinase JAK3 OS=Homo sapiens OX=9606 GN=JAK3 PE=1 SV=2	51.3983	228.28	0	199.448	260.026	171.02
Q969X5;Q969X5-2	2	1	8.9837	0.257329	0.0677181	1.61004	0.176471	PM54	CM55	32991.5	Endoplasmic reticulum-Golgi intermediate compartment protein 1 OS=Homo sapiens OX=9606 GN=ERGIC1 PE=1 SV=1	146.861	40.5948	159.413	166.308	242.719	149.445
P10809;E7ESH4;E7EXB4;C9JL25;P10809-2;C9JCQ4;C9JL19	15	8	96.6059	0.25833	0.0679358	1.01393	0.175839	PM54	CM55	61225.9	60 kDa heat shock protein_ mitochondrial OS=Homo sapiens OX=9606 GN=HSPD1 PE=1 SV=2	1929.43	1883.7	1940.63	1964.71	1930.25	1938.96
Q13045;Q13045-2;Q13045-3;J3KS39;J3KS54	4	2	16.3915	0.258555	0.0679492	1.05978	0.175697	CM55	PM54	146234	Protein flightless-1 homolog OS=Homo sapiens OX=9606 GN=FLII PE=1 SV=2	705.424	728.858	679.895	714.167	659.401	621.345
P15880;H0YEN5;E9PQD7;E9PM36;E9PMM9;I3L404;E9PPT0;H0YE27;H3BNG3	11	7	64.6166	0.261047	0.0685582	1.0604	0.174142	PM54	CM55	31609.6	40S ribosomal protein S2 OS=Homo sapiens OX=9606 GN=RPS2 PE=1 SV=2	1824.91	1898.99	2129.27	2049.59	2075.57	2081.52
REVERSE39318	3	2	12.039	0.261614	0.068661	1.20947	0.173791	PM54	CM55	72998.7	Reversed Sequence 39318	106.165	148.732	188.024	181.559	178.305	175.836
P50991;P50991-2	16	9	92.5316	0.264437	0.0693312	1.02863	0.172064	CM55	PM54	58437.6	T-complex protein 1 subunit delta OS=Homo sapiens OX=9606 GN=CCT4 PE=1 SV=4	1265.69	1325.62	1347.7	1303.69	1262.24	1263.45
Q14669;Q14669-3;Q14669-2;Q14669-4	6	1	28.5884	0.264523	0.0693312	1.7439	0.172012	CM55	PM54	222373	E3 ubiquitin-protein ligase TRIP12 OS=Homo sapiens OX=9606 GN=TRIP12 PE=1 SV=1	294.373	208.662	92.007	113.319	121.765	106.129
Q15008;H7C531;Q15008-2;Q15008-3;Q15008-4	2	1	8.5528	0.265174	0.0694553	1.32865	0.171618	PM54	CM55	45816.6	26S proteasome non-ATPase regulatory subunit 6 OS=Homo sapiens OX=9606 GN=PSMD6 PE=1 SV=1	339.503	415.353	175.296	370.747	426.824	438.271
REVERSE11610	4	1	20.6304	0.265594	0.0695186	2.01873	0.171365	PM54	CM55	92478.9	Reversed Sequence 11610	30.5079	0	138.763	130.818	112.394	98.5007
Q9UBC5;G3V342	13	2	58.0593	0.266872	0.0698064	1.09627	0.170597	CM55	PM54	119313	Unconventional myosin-Ia OS=Homo sapiens OX=9606 GN=MYO1A PE=2 SV=1	474.238	554.56	564.158	515.711	444.778	492.576
Q9NY65;C9J2C0;Q9NY65-2;V9GZ17	29	13	148.566	0.26813	0.0700455	1.04998	0.169848	PM54	CM55	50778	Tubulin alpha-8 chain OS=Homo sapiens OX=9606 GN=TUBA8 PE=1 SV=1	6096.74	6399.44	6200.61	6973.04	6202.34	6455.92
REVERSE26534	7	1	32.7164	0.268145	0.0700455	1.08252	0.169839	PM54	CM55	150095	Reversed Sequence 26534	770.494	927.071	816.168	851.986	947.745	921.435
REVERSE10743	5	1	20.9406	0.268397	0.0700647	1.24025	0.16969	PM54	CM55	105549	Reversed Sequence 10743	467.172	394.805	405.278	618.006	385.774	567.927
REVERSE39748	3	1	10.6755	0.269314	0.0702571	1.1413	0.169148	CM55	PM54	212926	Reversed Sequence 39748	121.738	108.473	136.181	120.773	91.2566	109
Q13402;Q13402-2;Q13402-5;Q13402-6;Q13402-7;Q13402-8;H7C4D8;B9A012;Q13402-3;A0A087WT71;Q13402-4	8	1	40.2808	0.270305	0.0704686	2.39207	0.168566	PM54	CM55	256500	Unconventional myosin-VIIa OS=Homo sapiens OX=9606 GN=MYO7A PE=1 SV=2	74.6782	129.21	0	177.957	165.214	144.545
REVERSE58335	1	1	4.0434	0.271488	0.0706977	1.15901	0.167875	CM55	PM54	123494	Reversed Sequence 58335	66.6359	86.57	80.7786	63.751	59.0875	79.0438
REVERSE24615	12	2	50.0873	0.271546	0.0706977	1.21441	0.167842	PM54	CM55	594173	Reversed Sequence 24615	153.77	133.574	233.53	200.147	230.145	202.26
Q7Z2Z1;Q7Z2Z1-2;H0YN97	3	1	13.4514	0.271883	0.0707385	1.58304	0.167646	CM55	PM54	212853	Treslin OS=Homo sapiens OX=9606 GN=TICRR PE=1 SV=2	184.075	89.2299	102.314	116.46	38.081	82.7354
I3L0N3;P46459;P46459-2;I3L0L3;I3L2G1;K7EQD6	7	2	42.9369	0.272065	0.0707387	1.10791	0.16754	CM55	PM54	82605.2	Vesicle-fusing ATPase OS=Homo sapiens OX=9606 GN=NSF PE=1 SV=1	448.429	368.055	425.498	341.714	411.647	367.649
Q16787;A0A0A0MSA0;Q16787-3;A0A0A0MTS5;A0A0A6YYF2;K7EIP4;Q16787-1;Q16787-4;A0A075B783	14	1	52.9122	0.274054	0.0711939	1.36307	0.166394	PM54	CM55	375888	Laminin subunit alpha-3 OS=Homo sapiens OX=9606 GN=LAMA3 PE=1 SV=2	38.6583	11.6718	486.263	219.104	252.017	260.296
REVERSE8255	2	2	10.0943	0.27428	0.0711939	1.21577	0.166265	CM55	PM54	14629.8	Reversed Sequence 8255	481.273	668.484	624.137	555.364	376.11	527.597
Q14568	7	1	59.549	0.274362	0.0711939	1.27969	0.166217	PM54	CM55	39478.9	Heat shock protein HSP 90-alpha A2 OS=Homo sapiens OX=9606 GN=HSP90AA2P PE=1 SV=2	186.375	249.703	117.089	219.671	222.701	265.511
P11137;P11137-3;E7EV03;P11137-2;P11137-4	9	1	48.2566	0.274974	0.0713052	1.09912	0.165868	CM55	PM54	199983	Microtubule-associated protein 2 OS=Homo sapiens OX=9606 GN=MAP2 PE=1 SV=4	1284.16	1465.1	1510.53	1277.76	1172.3	1425.57
Q07954	18	4	90.594	0.276007	0.0715257	1.22413	0.165281	CM55	PM54	523483	Prolow-density lipoprotein receptor-related protein 1 OS=Homo sapiens OX=9606 GN=LRP1 PE=1 SV=2	176.76	190.671	246.879	158.519	209.804	133.513
REVERSE8969	9	1	35.0407	0.277864	0.071927	1.23254	0.164235	PM54	CM55	337753	Reversed Sequence 8969	165.827	237.855	259.699	281.329	221.133	315.178
Q86UP2;Q86UP2-2;Q86UP2-3;Q86UP2-4;G3V4Y7;B7Z6P3;G3V5P0;H0YJV5	11	2	65.8065	0.277924	0.071927	1.14576	0.164202	PM54	CM55	156561	Kinectin OS=Homo sapiens OX=9606 GN=KTN1 PE=1 SV=1	150.449	186.851	215.825	210.438	194.157	229.154
C9J177;H7C003;Q15435;Q15435-2;B5MBZ8;C9JD73;Q15435-3;Q15435-4;Q15435-5	4	1	19.9785	0.278538	0.0720382	1.56663	0.163859	PM54	CM55	33798	Protein phosphatase 1 regulatory subunit 7 (Fragment) OS=Homo sapiens OX=9606 GN=PPP1R7 PE=1 SV=1	16.1348	10.417	149.301	124.384	52.6091	98.5044
O14950;J3QRS3;P19105	18	8	151.279	0.278854	0.0720723	1.07527	0.163682	CM55	PM54	19836.2	Myosin regulatory light chain 12B OS=Homo sapiens OX=9606 GN=MYL12B PE=1 SV=2	8387.92	7842.31	8730.01	7226.02	8519.44	7467.53
P54578;P54578-2;A6NJA2;P54578-3;J3KS55;J3QQT6	7	2	35.7017	0.280641	0.0724863	1.57911	0.162692	PM54	CM55	56525.4	Ubiquitin carboxyl-terminal hydrolase 14 OS=Homo sapiens OX=9606 GN=USP14 PE=1 SV=3	19.4374	85.1565	137.067	134.532	126.948	120.128
Q8NBE8	2	1	8.5729	0.281794	0.072736	1.19604	0.162058	CM55	PM54	65120.9	Kelch-like protein 23 OS=Homo sapiens OX=9606 GN=KLHL23 PE=1 SV=1	224.904	187.721	200.599	169.253	215.588	127.871
REVERSE28332	33	4	136.575	0.284693	0.0734356	1.05063	0.160484	PM54	CM55	226045	Reversed Sequence 28332	1273.89	1311.51	1452.78	1424.27	1384.89	1433.49
Q9P278;Q9P278-2	6	2	24.052	0.287278	0.0740535	1.12377	0.159102	PM54	CM55	123712	Folliculin-interacting protein 2 OS=Homo sapiens OX=9606 GN=FNIP2 PE=1 SV=2	495.94	516.045	623.134	640.723	660.597	536.174
A0A2R8Y880;Q7Z6E9;Q7Z6E9-2;H3BUN0;Q7Z6E9-4	3	1	12.7471	0.288156	0.0742309	1.11787	0.158637	PM54	CM55	198278	E3 ubiquitin-protein ligase RBBP6 (Fragment) OS=Homo sapiens OX=9606 GN=RBBP6 PE=1 SV=1	222.754	168.314	226.215	221.353	235.911	232.774
O15260;O15260-2;O15260-3;Q5T8U5;B7Z1G8	4	4	21.5889	0.289091	0.0744229	1.05558	0.158144	PM54	CM55	30622.2	Surfeit locus protein 4 OS=Homo sapiens OX=9606 GN=SURF4 PE=1 SV=3	2672.82	2854.63	2500.25	2840.11	2702.03	2931.77
REVERSE17498	5	4	24.5988	0.289595	0.0745034	1.41938	0.15788	PM54	CM55	158680	Reversed Sequence 17498	292.976	65.2782	66.5769	187.722	230.21	185.064
REVERSE24169	7	1	32.697	0.290258	0.0746248	1.09632	0.157533	PM54	CM55	216316	Reversed Sequence 24169	1208.46	1315.01	1199.75	1463.93	1431.02	1186.9
REVERSE19640	11	2	40.3001	0.29045	0.0746251	1.10198	0.157433	CM55	PM54	495680	Reversed Sequence 19640	462.711	485.96	438.571	380.79	390.126	487.946
P30622;P30622-1;P30622-2;J3KP58;F5H0N7;F5H6A0;F5H1T5;F6VGP8	19	1	83.4484	0.293195	0.0752809	1.32933	0.156013	PM54	CM55	162988	CAP-Gly domain-containing linker protein 1 OS=Homo sapiens OX=9606 GN=CLIP1 PE=1 SV=2	0	8.4658	99.7549	42.939	50.3527	50.5697
Q7Z695;C9JE15;H7C4I2	4	1	19.1057	0.294279	0.0754828	1.65474	0.155458	PM54	CM55	69723.2	Uncharacterized aarF domain-containing protein kinase 2 OS=Homo sapiens OX=9606 GN=ADCK2 PE=2 SV=1	5.58308	47.8141	20.203	25.2821	46.6056	49.9016
Q96BY7	4	1	14.4482	0.294368	0.0754828	1.16323	0.155413	PM54	CM55	234645	Autophagy-related protein 2 homolog B OS=Homo sapiens OX=9606 GN=ATG2B PE=1 SV=5	579.353	869.057	555.026	779.029	767.851	783.582
Q5VTH9;H0YDI6;Q5VTH9-2;Q5VTH9-3;Q5TAD8	3	1	19.8753	0.294916	0.0755295	1.29923	0.155133	PM54	CM55	95314.1	WD repeat-containing protein 78 OS=Homo sapiens OX=9606 GN=WDR78 PE=2 SV=1	418.798	190.637	359.542	464.986	351.775	442.165
Q8N103;Q8N103-2;Q8N103-3	2	1	8.4273	0.295103	0.0755295	1.4549	0.155038	CM55	PM54	81444.5	T-cell activation Rho GTPase-activating protein OS=Homo sapiens OX=9606 GN=TAGAP PE=1 SV=1	103.002	149.156	217.154	72.5444	162.331	87.6988
Q9BVK6;F8W7F7;Q7Z7H5;Q7Z7H5-2;Q7Z7H5-3	2	2	14.0808	0.29513	0.0755295	1.10906	0.155025	CM55	PM54	27391.5	Transmembrane emp24 domain-containing protein 9 OS=Homo sapiens OX=9606 GN=TMED9 PE=1 SV=2	1482.91	1368.17	1718.47	1262.27	1507.99	1349.94
Q71U36;Q71U36-2;P0DPH7;P0DPH8;P0DPH7-2;Q6PEY2;F8VQQ4	22	1	277.365	0.298428	0.0763237	1.01575	0.153364	CM55	PM54	50820	Tubulin alpha-1A chain OS=Homo sapiens OX=9606 GN=TUBA1A PE=1 SV=1	6793.04	6704.82	6862.99	6650.59	6825.61	6568.9
REVERSE36571	3	1	10.7719	0.300639	0.0768389	1.5166	0.152269	CM55	PM54	100220	Reversed Sequence 36571	56.842	113.846	147.578	72.261	62.1294	75.4652
A6NIZ0;J3KRK9;J3QL85;Q9GZM8;Q9GZM8-2;Q9GZM8-3;J3KSF2;J3KT16;J3QL31;J3QLD0;J3QRD2;Q9NXR1;Q9NXR1-1	3	1	15.1779	0.302504	0.0772649	1.29291	0.151355	PM54	CM55	30695.2	Nuclear distribution protein nudE-like 1 OS=Homo sapiens OX=9606 GN=NDEL1 PE=1 SV=4	175.127	434.843	186.214	348.939	354.393	326.059
Q460N5;Q460N5-4;Q460N5-1;H7C5R8;H7C4Y3;Q460N5-3	11	1	46.1806	0.30542	0.0779589	2.18304	0.149943	CM55	PM54	204853	Poly [ADP-ribose] polymerase 14 OS=Homo sapiens OX=9606 GN=PARP14 PE=1 SV=3	215.991	57.9556	286.967	90.9297	97.907	68.1048
E7EQI7;Q12768	4	1	18.5601	0.305792	0.0780027	1.08587	0.149765	CM55	PM54	117807	WASH complex subunit 5 OS=Homo sapiens OX=9606 GN=WASHC5 PE=1 SV=1	4521.21	4370.92	3705.83	3950.01	4000.43	3651.23
Q14185;A0A096LNH6	7	1	33.2311	0.306172	0.0780387	1.61106	0.149583	CM55	PM54	216316	Dedicator of cytokinesis protein 1 OS=Homo sapiens OX=9606 GN=DOCK1 PE=1 SV=2	574.875	391.522	195.096	250.591	185.405	284.953
REVERSE23125	7	1	27.4333	0.306332	0.0780387	1.21472	0.149507	PM54	CM55	263158	Reversed Sequence 23125	131.278	245.048	159.809	241.126	198.481	211.647
P13535	19	1	102.959	0.308282	0.0784843	1.56577	0.14858	PM54	CM55	223732	Myosin-8 OS=Homo sapiens OX=9606 GN=MYH8 PE=1 SV=3	14.5909	121.81	69.8097	83.0882	122.954	116.836
A0A0J9YWL9	11	1	56.6115	0.308806	0.0785189	1.27419	0.148333	PM54	CM55	110491	Putative testis-expressed protein 13C OS=Homo sapiens OX=9606 GN=TEX13C PE=5 SV=1	313.739	176.776	436.324	402.955	382.854	395.155
P59998;F8WCF6;P59998-3;A0A0A6YYG9;F8WDD7;H7C0A3;P59998-2;P59998-4;R4GN08;F8WDW3;F8WE39	11	7	35.1777	0.30882	0.0785189	1.07603	0.148326	PM54	CM55	19781.1	Actin-related protein 2/3 complex subunit 4 OS=Homo sapiens OX=9606 GN=ARPC4 PE=1 SV=3	1271.2	1108.12	1010.64	1219.74	1220.58	1207.38
O14638;F8W6H5	5	1	23.497	0.310443	0.0788803	1.43213	0.147565	PM54	CM55	102063	Ectonucleotide pyrophosphatase/phosphodiesterase family member 3 OS=Homo sapiens OX=9606 GN=ENPP3 PE=1 SV=2	69.1888	190.219	378.859	314.082	274.922	325.076
Q86Y13;C9J9M8;Q86Y13-2;C9J702	10	1	39.2727	0.311443	0.0790829	2.75383	0.147099	CM55	PM54	140144	E3 ubiquitin-protein ligase DZIP3 OS=Homo sapiens OX=9606 GN=DZIP3 PE=1 SV=2	154.916	24.9868	170.189	56.5886	33.2904	37.2499
REVERSE35624	5	1	21.2005	0.312125	0.0792046	1.13634	0.146783	PM54	CM55	204853	Reversed Sequence 35624	558.608	598.483	438.139	541.736	594.257	676.736
Q9H3U7;Q9H3U7-2;H0Y5I1;H0Y3J4	3	1	18.0972	0.314975	0.079876	1.10226	0.145473	PM54	CM55	50985.8	SPARC-related modular calcium-binding protein 2 OS=Homo sapiens OX=9606 GN=SMOC2 PE=2 SV=2	679.665	855.944	637.33	790.929	775.827	828.392
P34897;P34897-3;P34897-2;G3V5L0;G3V4W5;G3V540;G3V241;G3V2E4;G3V2W0;G3V2Y4;G3V3Y8;G3V4T0;G3V4X0;G3V2D2;P34896;P34896-2;P34896-3;P34896-4	6	1	35.085	0.315179	0.079876	1.28202	0.14538	PM54	CM55	56449.3	Serine hydroxymethyltransferase_ mitochondrial OS=Homo sapiens OX=9606 GN=SHMT2 PE=1 SV=3	270.885	699.72	356.028	545.902	623.797	531.073
REVERSE38409	33	3	130.914	0.31598	0.0800271	1.11087	0.145015	PM54	CM55	533787	Reversed Sequence 38409	215.813	224.801	252.171	263.807	220.777	285.007
Q15438;Q15438-2;K7EJN5	2	1	10.2425	0.317549	0.0803724	1.28678	0.144307	CM55	PM54	46869	Cytohesin-1 OS=Homo sapiens OX=9606 GN=CYTH1 PE=1 SV=1	596.822	481.292	331.864	418.377	286.059	391.302
A3KMH1;A3KMH1-3;A3KMH1-2	19	2	92.4925	0.323634	0.0818593	1.15574	0.141612	CM55	PM54	215851	von Willebrand factor A domain-containing protein 8 OS=Homo sapiens OX=9606 GN=VWA8 PE=1 SV=2	363.807	279.057	407.769	308.367	320.353	280.337
P10155;P10155-3;P10155-4;P10155-5;P10155-2	4	1	20.8688	0.324278	0.0819693	1.34127	0.141332	PM54	CM55	61412.1	60 kDa SS-A/Ro ribonucleoprotein OS=Homo sapiens OX=9606 GN=TROVE2 PE=1 SV=2	76.4052	147.53	172.916	164.951	229.925	137.411
H0Y3Y3	4	1	23.4001	0.324644	0.0820087	1.17539	0.141173	PM54	CM55	17671	ATP-dependent 6-phosphofructokinase_ platelet type (Fragment) OS=Homo sapiens OX=9606 GN=PFKP PE=1 SV=1	265.835	162.678	207.059	224.511	282.9	239.635
REVERSE32171	2	1	8.2936	0.326193	0.0823469	1.21541	0.140504	PM54	CM55	62569.2	Reversed Sequence 32171	103.501	133.823	66.8309	133.488	113.716	122.47
REVERSE17231	5	1	24.9796	0.32689	0.0824694	2.42086	0.140205	CM55	PM54	111082	Reversed Sequence 17231	212.007	40.9652	237.54	55.021	72.2988	75.2992
P37802;P37802-2;X6RJP6;C9J5W6;Q9UI15	25	21	133.362	0.32731	0.0825221	1.03727	0.140025	PM54	CM55	22562.6	Transgelin-2 OS=Homo sapiens OX=9606 GN=TAGLN2 PE=1 SV=3	13271.5	13729.2	14406.1	14664.2	13675.7	14610.3
O43918;O43918-2;O43918-4;O43918-3	3	1	14.0399	0.328265	0.0827095	1.04432	0.139618	CM55	PM54	58753.2	Autoimmune regulator OS=Homo sapiens OX=9606 GN=AIRE PE=1 SV=1	847.914	827.69	793.063	734.814	819.988	809.102
Q6ZU52;Q6ZU52-2;E9PQS0	7	2	34.7969	0.328558	0.0827302	1.11684	0.139493	PM54	CM55	80132.2	Uncharacterized protein KIAA0408 OS=Homo sapiens OX=9606 GN=KIAA0408 PE=1 SV=1	229.368	267.026	196.098	250.651	284.822	237.928
D6RGG3;Q99715;Q99715-4;A0A087X0A8;Q99715-2;H0Y5N9;H0Y4P7	11	3	52.6821	0.329146	0.0827417	1.17958	0.139244	PM54	CM55	334400	Collagen alpha-1(XII) chain OS=Homo sapiens OX=9606 GN=COL12A1 PE=1 SV=1	715.362	1208.11	807.8	1042.98	1197.54	981.244
P40261	2	1	15.7558	0.329265	0.0827417	1.09801	0.139194	CM55	PM54	30030.3	Nicotinamide N-methyltransferase OS=Homo sapiens OX=9606 GN=NNMT PE=1 SV=1	2044.55	2103.15	2535.64	2006.29	2203.47	1877.03
REVERSE11862	5	1	25.4442	0.32938	0.0827417	1.03731	0.139145	PM54	CM55	117414	Reversed Sequence 11862	891.249	822.69	825.456	914.018	864.866	855.246
A0A2R8YEM3;E7EQV9;P61313;A0A2R8Y738;E7ENU7;E7EX53;P61313-2	4	2	25.1166	0.329451	0.0827417	1.01747	0.139115	PM54	CM55	20082.3	Ribosomal protein L15 (Fragment) OS=Homo sapiens OX=9606 GN=RPL15 PE=1 SV=1	2116.42	2081.61	2190.23	2179.21	2175.56	2145.09
P07954;P07954-2	7	4	41.2242	0.330676	0.082996	1.21567	0.138598	CM55	PM54	54808.2	Fumarate hydratase_ mitochondrial OS=Homo sapiens OX=9606 GN=FH PE=1 SV=3	314.116	467.662	517.545	333.759	349.62	385.437
Q9Y252;Q9Y252-2;Q9Y252-3	3	1	14.4749	0.331665	0.0831907	1.10712	0.138184	PM54	CM55	78490.5	E3 ubiquitin-protein ligase RNF6 OS=Homo sapiens OX=9606 GN=RNF6 PE=1 SV=1	1550.59	1193.72	1165.52	1364.5	1547.22	1416.93
P62306	1	1	6.2866	0.334278	0.0837581	1.28896	0.137098	PM54	CM55	9782.26	Small nuclear ribonucleoprotein F OS=Homo sapiens OX=9606 GN=SNRPF PE=1 SV=1	172.282	431.347	388.003	395.388	403.147	479.637
P53804;P53804-2;P53804-3;E9PCE7;E9PMP8;H7BZ57;H7C097	11	2	39.1855	0.334355	0.0837581	1.18485	0.137066	CM55	PM54	233006	E3 ubiquitin-protein ligase TTC3 OS=Homo sapiens OX=9606 GN=TTC3 PE=1 SV=2	562.234	573.398	457.551	542.307	324.091	478.233
A0A1B0GTN0;A0A1B0GUN6;Q01668;Q01668-3;Q01668-2;A0A1B0GUB6;Q01668-4;A0A1W2PQ56;Q59GD8	6	2	31.027	0.341685	0.0855393	1.13578	0.134098	CM55	PM54	248765	Voltage-dependent L-type calcium channel subunit alpha OS=Homo sapiens OX=9606 GN=CACNA1D PE=3 SV=1	408.842	497.69	578.134	459.416	395.727	452.031
REVERSE21737	14	1	64.9644	0.345573	0.0864572	1.41736	0.132567	CM55	PM54	223888	Reversed Sequence 21737	274.871	146.653	180.207	206.772	153.477	64.2951
Q5THR3;Q5THR3-5;Q5THR3-2;Q5THR3-3;Q5THR3-6;B0QYI5;Q5THR3-4	19	5	87.5038	0.346432	0.0866167	1.06262	0.132233	PM54	CM55	174812	EF-hand calcium-binding domain-containing protein 6 OS=Homo sapiens OX=9606 GN=EFCAB6 PE=1 SV=1	577.453	677.883	619.997	704.319	663.702	624.753
Q13492;Q13492-2;Q13492-3;Q13492-4;Q13492-5;E9PI56;E9PKP6;E9PLJ8;H0YEF7;H0YEH1	4	2	24.6592	0.354142	0.0884877	1.04927	0.129296	PM54	CM55	70925.8	Phosphatidylinositol-binding clathrin assembly protein OS=Homo sapiens OX=9606 GN=PICALM PE=1 SV=2	1158.48	1186.33	1142.89	1324.54	1184.2	1150.81
P62873;P62873-2;B3KVK2;F6UT28;F6X3N5;B1AKQ8;H7C5J5	9	4	59.1528	0.355343	0.0887311	1.32538	0.128848	CM55	PM54	38175.4	Guanine nucleotide-binding protein G(I)/G(S)/G(T) subunit beta-1 OS=Homo sapiens OX=9606 GN=GNB1 PE=1 SV=3	563.463	1128.68	1079.22	737.976	671.764	681.261
Q96JH7	3	1	12.2639	0.355611	0.0887415	1.48583	0.128748	PM54	CM55	135689	Deubiquitinating protein VCIP135 OS=Homo sapiens OX=9606 GN=VCPIP1 PE=1 SV=2	29.7046	258.463	395.297	286.955	390.441	338.119
P46782;M0R0F0;M0R0R2;M0QZN2	6	4	33.4275	0.356314	0.0888602	1.07805	0.128488	PM54	CM55	23047.5	40S ribosomal protein S5 OS=Homo sapiens OX=9606 GN=RPS5 PE=1 SV=4	4491.86	4925.4	5449.53	5757.8	4894.55	5374.78
Q8WUM4;Q8WUM4-2;Q8WUM4-3;C9IZF9;F8WBR8;F8WEQ7;F8WDK9	13	6	79.3827	0.357297	0.0890485	1.08931	0.128125	PM54	CM55	96650.6	Programmed cell death 6-interacting protein OS=Homo sapiens OX=9606 GN=PDCD6IP PE=1 SV=1	1503.97	1151.51	1481.13	1500.09	1450.43	1555.53
O75037	5	2	17.602	0.359058	0.0894304	3.27705	0.127479	CM55	PM54	184430	Kinesin-like protein KIF21B OS=Homo sapiens OX=9606 GN=KIF21B PE=1 SV=2	559.206	74.2366	72.6869	61.6358	73.276	80.5657
Q9UBB9	2	1	8.5624	0.360534	0.0897407	1.17747	0.126943	CM55	PM54	97219.2	Tuftelin-interacting protein 11 OS=Homo sapiens OX=9606 GN=TFIP11 PE=1 SV=1	449.176	337.691	486.128	427.385	365.745	287.997
Q86VF2-5;Q86VF2;H7BZ61;Q86VF2-2;Q86VF2-4	55	10	258.164	0.360894	0.0897732	1.03696	0.126812	PM54	CM55	385973	Isoform 5 of Immunoglobulin-like and fibronectin type III domain-containing protein 1 OS=Homo sapiens OX=9606 GN=IGFN1	6522.42	6688.66	6760.6	7358.21	6710.11	6641.42
REVERSE26716	5	1	25.4784	0.362613	0.0901433	1.52168	0.126193	PM54	CM55	257131	Reversed Sequence 26716	6.0683	97.6204	90.5068	112.495	76.4002	106.607
Q9BSJ2;Q9BSJ2-4;Q9BSJ2-3;F2Z2B9;R4GMM4	6	1	38.421	0.365147	0.0907155	1.55541	0.125289	PM54	CM55	103162	Gamma-tubulin complex component 2 OS=Homo sapiens OX=9606 GN=TUBGCP2 PE=1 SV=2	235.541	38.6977	71.4117	87.2666	254.382	195.981
P35442;Q5RI53	9	1	41.096	0.365656	0.0907844	3.35428	0.125109	CM55	PM54	133869	Thrombospondin-2 OS=Homo sapiens OX=9606 GN=THBS2 PE=1 SV=2	2.71163	45.2488	28.006	0.147062	15.2428	7.25777
Q12906;Q12906-2;Q12906-3;Q12906-4;Q12906-5;Q12906-6;Q12906-7;K7EKJ9;K7EQR9;K7EJ09;K7EM82;K7ENK6;K7EQ75;K7ER69;K7ERM6	4	1	21.478	0.367562	0.0911996	1.39705	0.124438	CM55	PM54	95737.7	Interleukin enhancer-binding factor 3 OS=Homo sapiens OX=9606 GN=ILF3 PE=1 SV=3	1901.75	831.662	965.114	1040.31	762.353	844.722
P62244;I3L3P7;I3L246;H3BN98;H3BT37;H3BV27;I3L303;H3BVC7	8	7	48.6219	0.373606	0.0926404	1.04184	0.12235	PM54	CM55	14953.6	40S ribosomal protein S15a OS=Homo sapiens OX=9606 GN=RPS15A PE=1 SV=2	980.53	1025.58	1013.1	1127.4	1018.82	999.318
Q96A08	6	1	35.1608	0.374592	0.0928259	1.06005	0.122015	CM55	PM54	14167.5	Histone H2B type 1-A OS=Homo sapiens OX=9606 GN=HIST1H2BA PE=1 SV=3	19736.5	16882.1	16838.4	16587.3	17456.7	16384.8
P51149;C9J592;C9J8S3;C9IZZ0;C9J4V0;C9J4S4;C9J7D1	8	3	59.4568	0.375582	0.0930124	1.02549	0.12168	CM55	PM54	23774.9	Ras-related protein Rab-7a OS=Homo sapiens OX=9606 GN=RAB7A PE=1 SV=1	2194.24	2051.76	2149.08	2101.6	2118.6	2015.94
Q9NTI5;Q9NTI5-2;A9IYQ1	3	1	13.0952	0.376078	0.0930763	8.07808	0.121512	CM55	PM54	165922	Sister chromatid cohesion protein PDS5 homolog B OS=Homo sapiens OX=9606 GN=PDS5B PE=1 SV=1	0	132.6	154.758	0	35.5726	0
Q9NQX4;Q9NQX4-2;H0YMK3	11	2	52.1751	0.38032	0.0940403	1.25962	0.120098	PM54	CM55	204122	Unconventional myosin-Vc OS=Homo sapiens OX=9606 GN=MYO5C PE=1 SV=2	137.41	68.0491	170.133	185.69	156.82	130.594
E9PM69;P17980;R4GNH3;E9PKD5;E9PMD8;E9PLG2;E9PN50	6	1	35.0577	0.380455	0.0940403	1.092	0.120054	CM55	PM54	44609	26S proteasome regulatory subunit 6A OS=Homo sapiens OX=9606 GN=PSMC3 PE=1 SV=1	699.035	758.114	717.363	774.33	557.344	659.634
Q8NCW5;Q5T3I3;Q5T3I4;Q8NCW5-2	3	1	16.2265	0.382055	0.0943762	1.64286	0.119528	CM55	PM54	32016.8	NAD(P)H-hydrate epimerase OS=Homo sapiens OX=9606 GN=NAXE PE=1 SV=2	169.115	515.512	520.809	303.302	269.301	161.141
A2A3N6	3	2	14.3781	0.384795	0.094993	1.04155	0.118637	PM54	CM55	95789.1	Putative PIP5K1A and PSMD4-like protein OS=Homo sapiens OX=9606 GN=PIPSL PE=5 SV=1	103.433	105.818	106.571	104.125	106.542	118.28
P11766;H0YAG8;D6RFE4;D6R9G2;D6RAY0	10	4	61.0667	0.386987	0.0954738	1.06897	0.117931	PM54	CM55	40579.7	Alcohol dehydrogenase class-3 OS=Homo sapiens OX=9606 GN=ADH5 PE=1 SV=4	1290.32	1020.06	1080.1	1195.2	1255.62	1173.52
Q8N1W1;Q8N1W1-3;Q8N1W1-6;Q8N1W1-4;Q8N1W1-5	3	1	12.6519	0.388206	0.095714	1.23583	0.117543	CM55	PM54	194001	Rho guanine nucleotide exchange factor 28 OS=Homo sapiens OX=9606 GN=ARHGEF28 PE=1 SV=3	379.015	312.456	301.206	285.932	145.842	371.471
P35237;A0A024QZX5;A0A087X1N8;A0A2R8YD12;A0A2R8Y6A7;A0A2R8Y517;A0A2R8YDD0	13	5	84.1209	0.390167	0.0960828	1.06763	0.116921	CM55	PM54	42964.2	Serpin B6 OS=Homo sapiens OX=9606 GN=SERPINB6 PE=1 SV=3	1282.2	1387.39	1117.34	1178.93	1164.98	1203.14
Q8NDA2;H0Y3X1	10	3	38.4799	0.390193	0.0960828	1.11621	0.116913	PM54	CM55	549563	Hemicentin-2 OS=Homo sapiens OX=9606 GN=HMCN2 PE=2 SV=3	435.15	299.544	306.574	420.327	366.105	375.84
P20702	2	1	4.2119	0.39063	0.0961298	1.0644	0.116775	PM54	CM55	129027	Integrin alpha-X OS=Homo sapiens OX=9606 GN=ITGAX PE=1 SV=3	3749.69	4256.11	4172.33	4661.02	3923.61	4377.83
Q8IVF5;Q8IVF5-2;Q8IVF5-5;E9PMZ8	5	2	20.5075	0.392677	0.0965728	1.12815	0.116134	CM55	PM54	191757	T-lymphoma invasion and metastasis-inducing protein 2 OS=Homo sapiens OX=9606 GN=TIAM2 PE=2 SV=4	324.812	339.582	341.692	273.681	385.233	232.884
REVERSE12097	1	1	8.7642	0.393441	0.0966999	1.15872	0.115896	PM54	CM55	54127.9	Reversed Sequence 12097	779.577	467.836	624.109	635.714	840.789	692.072
REVERSE5084	12	1	52.8873	0.394869	0.0969897	1.34385	0.115454	PM54	CM55	383041	Reversed Sequence 5084	370.98	285.399	0	298.021	283.842	300.213
P54727;P54727-2;Q5W0S5;Q5W0S4;H0Y579	7	5	37.1409	0.39869	0.0978667	1.06285	0.114285	CM55	PM54	43228.3	UV excision repair protein RAD23 homolog B OS=Homo sapiens OX=9606 GN=RAD23B PE=1 SV=1	547.773	602.368	489.698	502.902	517.445	522.524
Q96M63;Q96M63-5	3	1	17.0696	0.401994	0.0986159	1.07415	0.113289	PM54	CM55	75217.4	Coiled-coil domain-containing protein 114 OS=Homo sapiens OX=9606 GN=CCDC114 PE=1 SV=3	628.749	579.778	499.116	568.85	656.768	608.645
REVERSE19345	1	1	3.9402	0.402322	0.0986343	1.38036	0.113192	PM54	CM55	38920.2	Reversed Sequence 19345	0	79.717	96.3697	57.7373	96.8516	88.474
A0A1B0GUS7;O14795;O14795-2;B1AM27;F8W8M9;I6L9J0;A0A0U1RRB5	16	1	73.2046	0.402918	0.0987187	1.70476	0.113014	CM55	PM54	488691	Protein unc-13 homolog B OS=Homo sapiens OX=9606 GN=UNC13B PE=1 SV=1	318.534	127.269	82.9997	106.162	108.31	95.72
P46781;A0A024R4M0;B5MCT8;C9JM19;A8MXK4;F2Z3C0	10	6	57.6608	0.405599	0.0993133	1.02789	0.11222	CM55	PM54	22648.5	40S ribosomal protein S9 OS=Homo sapiens OX=9606 GN=RPS9 PE=1 SV=3	730.797	705.268	747.039	739.556	678.627	705.695
REVERSE10268	3	1	12.7511	0.406461	0.0994618	1.16076	0.111967	PM54	CM55	117779	Reversed Sequence 10268	656.322	82.4396	92.1834	331.936	280.413	352.179
B1AHA9;B1AHB1;F8WFD7;P33992	1	1	4.7298	0.407094	0.0995546	1.32521	0.111782	PM54	CM55	26128.6	DNA replication licensing factor MCM5 (Fragment) OS=Homo sapiens OX=9606 GN=MCM5 PE=1 SV=8	95.4288	0	138.91	106.961	77.1603	126.427
Q07020;G3V203;H0YHA7;J3QQ67;Q07020-2;F8VUA6;A0A075B7A0;F8VYV2	8	6	38.4874	0.409429	0.100063	1.02908	0.111103	PM54	CM55	21748.6	60S ribosomal protein L18 OS=Homo sapiens OX=9606 GN=RPL18 PE=1 SV=2	3432.13	3228.46	3511.3	3589.03	3365.1	3513.54
P42262;P42262-2;P42262-3;P42262-4;F8W7L6;D6RDX5	6	1	25.2643	0.411149	0.100421	1.18983	0.110608	CM55	PM54	99448.6	Glutamate receptor 2 OS=Homo sapiens OX=9606 GN=GRIA2 PE=1 SV=3	215.49	213.035	328.195	175.389	256.528	204.073
P02786;G3V0E5;F8WBE5	7	2	34.2628	0.414377	0.101141	1.14357	0.109688	PM54	CM55	85327.7	Transferrin receptor protein 1 OS=Homo sapiens OX=9606 GN=TFRC PE=1 SV=2	141.946	198.034	197.242	179.547	247.213	187.592
Q15058	7	1	23.9433	0.414616	0.101141	1.18667	0.10962	PM54	CM55	187861	Kinesin-like protein KIF14 OS=Homo sapiens OX=9606 GN=KIF14 PE=1 SV=1	260.726	406.412	341.071	447.88	449.561	298.975
Q9HCK8;Q9HCK8-2;H0YJG4;A0A2R8Y4P3;A0A2R8Y840;H0YJA4	14	1	55.5252	0.41609	0.101437	1.11838	0.109205	CM55	PM54	292344	Chromodomain-helicase-DNA-binding protein 8 OS=Homo sapiens OX=9606 GN=CHD8 PE=1 SV=5	233.714	262.353	275.463	223.682	181.096	285.083
REVERSE2130	3	1	12.8566	0.417132	0.101628	1.18367	0.108914	PM54	CM55	35707.3	Reversed Sequence 2130	4.63511	115.233	375.404	174.743	169.111	242.386
E7EPK1;E7ES33;Q16181;Q16181-2;G3V1Q4;A0A0U1RRE1;A0A0U1RRD1;A0A0U1RRH9;A0A0U1RRM2	11	5	75.0434	0.41755	0.101666	1.05609	0.108797	PM54	CM55	50980.2	Septin-7 OS=Homo sapiens OX=9606 GN=SEPT7 PE=1 SV=2	1189.55	1113.51	1380.39	1277.8	1329.49	1282.77
REVERSE39970	21	1	84.9816	0.419426	0.102059	1.20069	0.108275	PM54	CM55	455269	Reversed Sequence 39970	63.5573	12.9485	8.30459	38.7978	26.2166	36.8165
Q9BX26	6	1	22.7559	0.421473	0.10246	1.18591	0.107712	PM54	CM55	177350	Synaptonemal complex protein 2 OS=Homo sapiens OX=9606 GN=SYCP2 PE=2 SV=2	0.557691	713.648	705.43	598.466	545.859	539.241
A0A087WSV8;E9PKG6;P80303;P80303-2;Q2L696;H0YEG8	2	1	9.5714	0.421595	0.10246	1.08236	0.107678	PM54	CM55	50341.9	Nucleobindin 2_ isoform CRA_b OS=Homo sapiens OX=9606 GN=NUCB2 PE=1 SV=1	491.883	409.274	532.773	498.874	484.328	568.819
REVERSE37162	2	1	12.238	0.42228	0.102562	1.08164	0.107491	CM55	PM54	133063	Reversed Sequence 37162	834.435	906.724	1091.6	846.74	878.436	893.773
O00763;O00763-2;O00763-3;F8W8T8;H0YGH5;A0A087WUA1	14	2	61.3991	0.423785	0.102822	1.07032	0.107081	CM55	PM54	278537	Acetyl-CoA carboxylase 2 OS=Homo sapiens OX=9606 GN=ACACB PE=1 SV=3	740.822	622.386	590.804	583.558	621.504	620.569
Q9HDC9;H0Y512;Q9HDC9-2	2	1	10.2497	0.424048	0.102822	1.13591	0.107009	PM54	CM55	46651.5	Adipocyte plasma membrane-associated protein OS=Homo sapiens OX=9606 GN=APMAP PE=1 SV=2	638.297	518.55	364.124	613.603	588.269	525.808
Q02224;A0A087X0P0;Q02224-2;Q02224-3;D6RBW0;D6RHK2	23	1	111.837	0.42432	0.102822	1.58891	0.106936	CM55	PM54	317784	Centromere-associated protein E OS=Homo sapiens OX=9606 GN=CENPE PE=1 SV=2	353.242	424.224	125.48	215.671	151.454	201.155
P09493;A0A0S2Z4G6;H0YK48;H0YKJ4;H0YKP3;P09493-5;H0YL80;A0A087WTJ7;H0YKZ6;D6RGJ6;H0YLS7;K7ELP0	41	16	256.66	0.424403	0.102822	1.04579	0.106913	PM54	CM55	32765.6	Tropomyosin alpha-1 chain OS=Homo sapiens OX=9606 GN=TPM1 PE=1 SV=2	3209.8	3022.42	2916.72	3014.54	3447.76	3105.59
P55795;E5RGH4	8	1	50.6944	0.4248	0.102855	1.11235	0.106806	CM55	PM54	49548.8	Heterogeneous nuclear ribonucleoprotein H2 OS=Homo sapiens OX=9606 GN=HNRNPH2 PE=1 SV=1	228.294	317.443	240.193	248.147	218.361	240.043
B2RTY4;B2RTY4-2;B2RTY4-4;H3BRD5;B2RTY4-5;H3BV44;H3BMM1;H3BU05	20	3	90.6331	0.425878	0.103052	1.03865	0.106515	CM55	PM54	295101	Unconventional myosin-IXa OS=Homo sapiens OX=9606 GN=MYO9A PE=1 SV=2	1437.69	1498.86	1480.99	1507.21	1303.59	1442.36
A0A0J9YXN7;Q96Q06;Q96Q06-2	6	3	28.0172	0.427549	0.103334	1.04392	0.106067	PM54	CM55	136876	Perilipin-4 OS=Homo sapiens OX=9606 GN=PLIN4 PE=1 SV=1	4030.53	4069.54	3594.85	4180.72	4194.15	3833.68
P00367;P00367-3;P00367-2	8	1	42.1715	0.427572	0.103334	1.14596	0.106061	CM55	PM54	61740.1	Glutamate dehydrogenase 1_ mitochondrial OS=Homo sapiens OX=9606 GN=GLUD1 PE=1 SV=2	1952.8	2195.7	2995.53	1968.27	1953.09	2312.73
Q9UBG0;J3KRF1	9	3	45.5931	0.43206	0.104354	1.0538	0.104874	CM55	PM54	169868	C-type mannose receptor 2 OS=Homo sapiens OX=9606 GN=MRC2 PE=1 SV=2	1502.06	1574.24	1582.69	1540.13	1582.3	1298.71
P13010;C9JZ81	5	2	27.4788	0.432869	0.104485	1.04816	0.104663	CM55	PM54	83275	X-ray repair cross-complementing protein 5 OS=Homo sapiens OX=9606 GN=XRCC5 PE=1 SV=3	648.607	593.836	561.663	611.967	553.403	555.837
Q5JSZ5;Q5JSZ5-5;A0A1W2PQP5	11	3	50.1136	0.434302	0.104766	1.055	0.10429	CM55	PM54	244107	Protein PRRC2B OS=Homo sapiens OX=9606 GN=PRRC2B PE=1 SV=2	790.777	723.117	786.691	652.53	732.005	796.108
Q58FF3	9	1	41.2232	0.434894	0.104835	1.21698	0.104137	PM54	CM55	46372.3	Putative endoplasmin-like protein OS=Homo sapiens OX=9606 GN=HSP90B2P PE=5 SV=1	58.1709	210.818	130.585	158.428	164.323	163.521
A0A087WW46;A0A087X117;A0A0G2JN29;A0A0G2JP90;Q15155;J3KN36;P69849;Q5JPE7;Q5JPE7-2;Q5JPE7-3;H3BPS9;H3BUC9	7	1	36.5811	0.435126	0.104835	1.20219	0.104077	PM54	CM55	123021	Nodal modulator 1 OS=Homo sapiens OX=9606 GN=NOMO1 PE=1 SV=1	182.372	90.4839	108.056	146.832	121.641	189.457
A6H8Y1;A0A0G2JNU3;A6H8Y1-6;A6H8Y1-7;A6H8Y1-2;A6H8Y1-3;A6H8Y1-4;A6H8Y1-5;H7C5U4	8	1	26.8815	0.435742	0.104919	1.05214	0.103917	CM55	PM54	295539	Transcription factor TFIIIB component B'' homolog OS=Homo sapiens OX=9606 GN=BDP1 PE=1 SV=3	394.664	350.723	379.141	353.622	327.243	387.94
Q6AI08;K7EIX2;A0A087WXZ7;K7ELR8;K7EKW7;K7ESP5;K7EK31	11	2	60.3944	0.439949	0.105867	1.08759	0.102843	CM55	PM54	130492	HEAT repeat-containing protein 6 OS=Homo sapiens OX=9606 GN=HEATR6 PE=1 SV=1	311.778	263.45	231.452	253.066	234.558	254.086
Q8N8K9;Q8N8K9-3	1	1	3.695	0.441021	0.106059	1.42204	0.102572	CM55	PM54	80466.9	Uncharacterized protein KIAA1958 OS=Homo sapiens OX=9606 GN=KIAA1958 PE=1 SV=1	52.7393	122.431	141.626	65.4619	94.0177	63.2956
P42166;G5E972;P42167;P42167-2;P42167-3;H0YJH7	6	1	28.2322	0.442731	0.106403	1.06402	0.102142	PM54	CM55	76062.4	Lamina-associated polypeptide 2_ isoform alpha OS=Homo sapiens OX=9606 GN=TMPO PE=1 SV=2	475.512	448.721	395.363	507.296	427.675	469.102
P36871;P36871-2;P36871-3	12	6	76.6712	0.442996	0.106403	1.04124	0.102076	PM54	CM55	61734.4	Phosphoglucomutase-1 OS=Homo sapiens OX=9606 GN=PGM1 PE=1 SV=3	1150.86	1145.9	1301.59	1267.86	1187.75	1291.14
Q8NFP9;A0A0D9SF28;F5GXV7;Q5T321;Q8NFP9-3	19	3	85.1875	0.444689	0.106744	1.02952	0.101655	PM54	CM55	330274	Neurobeachin OS=Homo sapiens OX=9606 GN=NBEA PE=1 SV=3	838.238	922.847	935.729	913.755	940.811	921.864
REVERSE18617	1	1	4.1313	0.444971	0.106747	1.05516	0.101585	PM54	CM55	84215.2	Reversed Sequence 18617	1737.51	1877.09	1594.01	1986.8	1720.48	1788.61
Q9NQ38;E7EWP9;Q9NQ38-2;Q9NQ38-3;E5RFU9	7	1	36.4906	0.446214	0.106979	1.21096	0.101278	PM54	CM55	124421	Serine protease inhibitor Kazal-type 5 OS=Homo sapiens OX=9606 GN=SPINK5 PE=1 SV=2	132.914	102.638	211.648	163.856	233.333	144.351
Q6ZRK6	3	1	16.3999	0.447614	0.107249	1.24858	0.100934	PM54	CM55	125124	Coiled-coil domain-containing protein 73 OS=Homo sapiens OX=9606 GN=CCDC73 PE=2 SV=2	622.416	509.137	269.656	567.795	755.503	426.223
Q01459	1	1	4.9407	0.449241	0.107573	1.14764	0.100536	PM54	CM55	44444.2	Di-N-acetylchitobiase OS=Homo sapiens OX=9606 GN=CTBS PE=1 SV=1	309.089	608.627	337.429	515.634	436.293	488.525
H3BSW6;Q2VPK5;Q2VPK5-3;Q2VPK5-5;H3BPG4	5	1	22.0264	0.451062	0.107943	1.1897	0.100095	PM54	CM55	64879.5	Cytoplasmic tRNA 2-thiolation protein 2 OS=Homo sapiens OX=9606 GN=CTU2 PE=1 SV=1	57.6688	125.574	50.5468	110.697	86.7975	80.6444
O15144;H7C3F9;C9JTV5;G5E9J0	13	9	55.3748	0.452045	0.108112	1.05287	0.0998579	PM54	CM55	34447.1	Actin-related protein 2/3 complex subunit 2 OS=Homo sapiens OX=9606 GN=ARPC2 PE=1 SV=1	1161.9	930.364	1051.38	1090.82	1078.51	1140.52
A0A087X2I1;P62333;H0YJC0;H0YJS8;H0YJE9;H0YJT1	5	1	28.7853	0.457016	0.109234	1.0857	0.0986746	PM54	CM55	46082.2	26S proteasome regulatory subunit 10B OS=Homo sapiens OX=9606 GN=PSMC6 PE=1 SV=1	383.209	461.177	508.613	443.553	547.834	477.566
REVERSE41754	3	1	12.6846	0.458177	0.109444	1.20194	0.0984018	CM55	PM54	148893	Reversed Sequence 41754	227.054	207.449	158.881	193.777	89.9162	209.997
E9PM19;P29597	4	1	16.5477	0.45934	0.109655	1.03135	0.0981298	CM55	PM54	114617	Tyrosine-protein kinase OS=Homo sapiens OX=9606 GN=TYK2 PE=1 SV=1	757.097	703.336	796.481	732.225	728.73	727.353
Q13554;Q13554-2;Q13554-3;Q13554-5;Q13554-6;Q13554-8;H7BXS4;Q13554-4;Q13554-7;E9PBE8	5	1	34.7379	0.463673	0.110622	1.06089	0.0971282	CM55	PM54	73590.3	Calcium/calmodulin-dependent protein kinase type II subunit beta OS=Homo sapiens OX=9606 GN=CAMK2B PE=1 SV=3	1423.78	1266.37	1386.04	1122.85	1298.06	1421.33
P61026;A0A2R8YFB8;G3V196;H0YMN7;H0YNE9;P59190;P59190-2;P61006;P61006-2;Q92930;A0A2R8Y7G7;A0A2R8YDI9;A8MSP2;A8MTC6;A8MZI4;B7Z3L0;C9JB90;C9JFM7;C9JU14;E9PJQ5;G3V562;H0YL94;H0YLJ8;J3KR73;J3QSF4;M0R257;P20340-4;Q14964;Q6IQ22;Q86YS6;Q86YS6-2;Q96AX2;Q96AX2-2;Q96AX2-3;Q96AX2-4;Q96DA2;Q9H082	9	3	40.9383	0.466499	0.111228	1.05193	0.0964848	PM54	CM55	22769.1	Ras-related protein Rab-10 OS=Homo sapiens OX=9606 GN=RAB10 PE=1 SV=1	1454.98	1229.97	1207.51	1427.21	1377.75	1289.62
Q86UP3;Q86UP3-4;E7EVZ1;Q86UP3-2;Q86UP3-5;Q86UP3-3	16	4	63.2717	0.467704	0.111447	1.10352	0.0962127	PM54	CM55	398407	Zinc finger homeobox protein 4 OS=Homo sapiens OX=9606 GN=ZFHX4 PE=1 SV=1	683.776	544.236	813.019	654.099	793.718	804.501
F8VZE0;F8VZY0;G3V1V7;Q00872;Q00872-10;Q00872-2;Q00872-3;Q00872-4;Q00872-5;Q00872-6;Q00872-7;Q00872-8;Q00872-9	5	1	20.1297	0.469601	0.111831	1.21713	0.0957869	CM55	PM54	128646	Myosin-binding protein C_ slow-type OS=Homo sapiens OX=9606 GN=MYBPC1 PE=1 SV=1	49.9398	74.5595	73.5555	55.4822	27.5065	79.7341
Q8TE60;Q8TE60-2	3	2	14.2102	0.470408	0.111955	1.18804	0.0956068	PM54	CM55	139558	A disintegrin and metalloproteinase with thrombospondin motifs 18 OS=Homo sapiens OX=9606 GN=ADAMTS18 PE=1 SV=3	116.63	398.617	256.726	325.234	278.202	313.699
Q92499;A0A087X2G1;F1T0B3;Q92499-2;Q92499-3	7	1	41.14	0.47187	0.112235	1.059	0.0952822	CM55	PM54	83401.7	ATP-dependent RNA helicase DDX1 OS=Homo sapiens OX=9606 GN=DDX1 PE=1 SV=2	631.877	676.331	558.642	608.901	615.737	538.212
P06756;P06756-2;P06756-3;H7BZG1	14	2	66.5215	0.472553	0.112329	1.13065	0.0951311	PM54	CM55	117122	Integrin alpha-V OS=Homo sapiens OX=9606 GN=ITGAV PE=1 SV=2	278.031	196.632	158.005	246.214	265.123	203.986
Q70UQ0;Q70UQ0-2	7	1	37.0123	0.473732	0.112541	1.08219	0.0948715	CM55	PM54	39423.1	Inhibitor of nuclear factor kappa-B kinase-interacting protein OS=Homo sapiens OX=9606 GN=IKBIP PE=1 SV=1	246.645	268.187	221.151	215.008	267.784	197.297
D6RAN4;P32969;A0A2R8Y5Y7;E7ESE0;H0Y9R4;H0Y9V9	5	3	34.5794	0.478133	0.113517	1.01946	0.0939133	CM55	PM54	20832.3	60S ribosomal protein L9 (Fragment) OS=Homo sapiens OX=9606 GN=RPL9 PE=1 SV=8	3001.32	3114.78	3177.45	3016.89	2955.09	3144.17
REVERSE2705	6	1	25.7932	0.478982	0.11365	1.18004	0.0937304	CM55	PM54	195922	Reversed Sequence 2705	421.546	273.462	272.237	199.37	271.946	348.358
B7ZKJ3;B7ZKW7;F8W9W0;P54756;P54756-2;P54756-3;F8VP57	3	1	11.8406	0.48266	0.114453	1.20279	0.0929455	CM55	PM54	116838	EPH receptor A5_ isoform CRA_b OS=Homo sapiens OX=9606 GN=EPHA5 PE=1 SV=1	68.5057	104.471	103.147	102.913	83.6963	42.9602
O60701;O60701-2;O60701-3;E7ER83;E7ETF4;E7EV97;E7ER95;D6RHF4;E9PBD2	15	10	110.176	0.483217	0.114516	1.02682	0.0928277	CM55	PM54	55708.5	UDP-glucose 6-dehydrogenase OS=Homo sapiens OX=9606 GN=UGDH PE=1 SV=1	2468.3	2659.89	2574.96	2368.87	2584.8	2548.27
B0QY89;Q9Y262;Q9Y262-2;B0QY90;C9JHP4;C9K0Q7	9	4	51.7433	0.488046	0.11559	1.0442	0.0918174	CM55	PM54	71130.1	Eukaryotic translation initiation factor 3 subunit L OS=Homo sapiens OX=9606 GN=EIF3L PE=1 SV=1	847.076	736.354	783.334	773.743	698.195	794.637
P04275	4	1	13.811	0.492246	0.116514	1.65263	0.0909546	CM55	PM54	322609	von Willebrand factor OS=Homo sapiens OX=9606 GN=VWF PE=1 SV=4	186.226	185.832	48.3926	74.6037	103.184	76.6253
Q8NF99	4	1	15.3234	0.496435	0.117434	1.21037	0.0901087	PM54	CM55	62678.7	Zinc finger protein 397 OS=Homo sapiens OX=9606 GN=ZNF397 PE=1 SV=2	109.102	69.3082	72.2793	133.987	69.739	99.7011
Q12923;Q12923-2;Q12923-3;Q12923-4	10	2	37.2058	0.497759	0.117676	1.17587	0.0898444	PM54	CM55	279016	Tyrosine-protein phosphatase non-receptor type 13 OS=Homo sapiens OX=9606 GN=PTPN13 PE=1 SV=2	33.1009	96.6812	118.07	92.0704	99.1001	100.27
P45974;P45974-2;F5H571	6	4	38.7234	0.4987	0.117828	1.0762	0.0896573	CM55	PM54	96698.9	Ubiquitin carboxyl-terminal hydrolase 5 OS=Homo sapiens OX=9606 GN=USP5 PE=1 SV=2	471.698	586.468	439.027	448.166	467.082	475.933
Q9UHB9;Q9UHB9-4;Q9UHB9-2;Q9UHB9-3	6	2	31.6706	0.499204	0.117875	1.17726	0.0895574	PM54	CM55	71243	Signal recognition particle subunit SRP68 OS=Homo sapiens OX=9606 GN=SRP68 PE=1 SV=2	66.4065	178.187	235.132	210.831	175.661	178.271
P27635;X1WI28;A0A087WV22;F8W7C6;A6QRI9;B8A6G2;H7C123;H7C2C5;Q96L21	5	3	33.3257	0.505106	0.119197	1.02291	0.0884026	PM54	CM55	25060.2	60S ribosomal protein L10 OS=Homo sapiens OX=9606 GN=RPL10 PE=1 SV=4	2292.26	2322.99	2462.47	2432.92	2492.49	2314.43
Q16543;K7EL68;K7EQA9;K7EKQ2;K7EIU0	8	3	50.5612	0.507149	0.119535	1.01867	0.0880094	CM55	PM54	44981.6	Hsp90 co-chaperone Cdc37 OS=Homo sapiens OX=9606 GN=CDC37 PE=1 SV=1	581.346	589.133	623.667	592.322	572.478	596.459
O95153;O95153-2;O95153-3;J3KSY4	6	1	27.4431	0.507153	0.119535	1.3877	0.0880086	CM55	PM54	202389	Peripheral-type benzodiazepine receptor-associated protein 1 OS=Homo sapiens OX=9606 GN=TSPOAP1 PE=1 SV=2	28.4151	81.3484	29.4894	62.6756	8.5757	29.0964
Q9P2G9;Q68DU9;Q9P2G9-2;D6RGH5	6	2	27.0792	0.507489	0.119535	1.15463	0.0879442	PM54	CM55	69828.7	Kelch-like protein 8 OS=Homo sapiens OX=9606 GN=KLHL8 PE=1 SV=4	111.864	65.8377	89.4184	84.9988	91.9553	131.472
P09936;D6R956;D6RE83;D6R974;D6RF53	14	13	116.907	0.507763	0.119535	1.03422	0.0878918	CM55	PM54	25166.6	Ubiquitin carboxyl-terminal hydrolase isozyme L1 OS=Homo sapiens OX=9606 GN=UCHL1 PE=1 SV=2	2454.62	2630.35	2838.36	2623.95	2526.34	2510.89
REVERSE20946	4	1	27.9736	0.51016	0.120027	1.21975	0.0874355	CM55	PM54	208499	Reversed Sequence 20946	111.73	184.938	228.659	162.379	135.907	132.398
P10644;P10644-2;K7EM13;K7EPB2	6	3	33.0227	0.512176	0.120374	1.04962	0.0870553	PM54	CM55	43209.9	cAMP-dependent protein kinase type I-alpha regulatory subunit OS=Homo sapiens OX=9606 GN=PRKAR1A PE=1 SV=1	435.115	490.658	552.539	498.326	541.454	511.886
P35232;C9JW96;C9JZ20;E7ESE2;E9PCW0;D6RBK0;P35232-2	5	1	29.6308	0.51225	0.120374	1.07749	0.0870413	PM54	CM55	29861.1	Prohibitin OS=Homo sapiens OX=9606 GN=PHB PE=1 SV=1	1348.27	1756.9	1370.79	1823.04	1470.08	1529.68
REVERSE215	7	1	29.1604	0.513282	0.120475	1.24775	0.0868478	CM55	PM54	395231	Reversed Sequence 215	199.778	228.694	106.608	126.128	154.635	148.072
P35222;A0A2R8Y543;A0A2R8Y5A3;A0A2R8Y5Z1;A0A2R8Y7Z0;A0A2R8Y804;A0A2R8YCH5;B4DGU4;A0A2R8Y750;A0A2R8Y5C3;E7EMJ5	5	1	16.5057	0.513298	0.120475	1.09186	0.0868449	PM54	CM55	86124.1	Catenin beta-1 OS=Homo sapiens OX=9606 GN=CTNNB1 PE=1 SV=1	275.818	383.232	231.574	337.119	301.525	333.791
REVERSE6103	3	1	12.1832	0.515326	0.120879	1.46832	0.086467	CM55	PM54	360022	Reversed Sequence 6103	1031.61	310.115	444.481	317.493	526.789	372.216
E9PEJ4;H0YDD4;P10515	1	1	4.4273	0.516778	0.121147	1.12829	0.0861985	CM55	PM54	58042.9	Acetyltransferase component of pyruvate dehydrogenase complex OS=Homo sapiens OX=9606 GN=DLAT PE=1 SV=1	303.747	296.206	202.994	199.436	271.788	240.427
REVERSE35129	6	1	23.7358	0.52289	0.122506	1.127	0.0850847	CM55	PM54	282050	Reversed Sequence 35129	185.012	262.642	292.28	233.615	228.022	194.914
E9PDF1;Q8TF17;Q8TF17-5;D6RA65	2	1	7.907	0.523967	0.122685	1.03998	0.0848914	PM54	CM55	143494	SH3 domain and tetratricopeptide repeat-containing protein 2 OS=Homo sapiens OX=9606 GN=SH3TC2 PE=1 SV=1	208.925	219.028	209.206	214.395	242.961	205.275
Q99996;Q99996-3;Q99996-6;A0A0A0MRF6;Q99996-1;Q99996-5;A0A0A0MRE9;H7BYL6;A0A087WX84;Q99996-4;A0A2R8Y590;H7BZV6;Q6PJH3	60	4	302.66	0.525878	0.123058	1.13978	0.0845502	CM55	PM54	455269	A-kinase anchor protein 9 OS=Homo sapiens OX=9606 GN=AKAP9 PE=1 SV=4	1139.69	1911.69	1345.41	1235.47	1254.76	1367.35
Q2TAA8;B4DXD0;E7ENJ7;J3KQF4;Q2TAA8-2	8	2	44.2289	0.527234	0.123302	1.21568	0.0843096	CM55	PM54	77058.6	Translin-associated factor X-interacting protein 1 OS=Homo sapiens OX=9606 GN=TSNAXIP1 PE=2 SV=1	100.961	76.3233	142.908	101.14	44.4849	117.762
Q16671;Q16671-2;Q16671-3	1	1	8.8598	0.528696	0.12357	1.02176	0.0840517	PM54	CM55	64175.5	Anti-Muellerian hormone type-2 receptor OS=Homo sapiens OX=9606 GN=AMHR2 PE=1 SV=1	5073.02	5329.02	4815.67	5292.47	5053.19	5203.15
P04083;Q5T3N1;Q5T3N0	52	44	267.092	0.529833	0.123762	1.0116	0.0838523	PM54	CM55	38942.4	Annexin A1 OS=Homo sapiens OX=9606 GN=ANXA1 PE=1 SV=2	25707.9	26627.2	26094.3	27141.4	26004.3	26193.8
P19113;P19113-2	5	1	14.1667	0.534727	0.12483	1.05229	0.0830037	PM54	CM55	75224.2	Histidine decarboxylase OS=Homo sapiens OX=9606 GN=HDC PE=1 SV=2	1012.5	973.195	833.37	951.536	1085.97	928.979
P98082;P98082-3;P98082-2	7	2	41.538	0.53527	0.124882	1.05521	0.0829106	CM55	PM54	82562	Disabled homolog 2 OS=Homo sapiens OX=9606 GN=DAB2 PE=1 SV=3	534.001	636.736	571.039	497.246	616.949	536.455
Q9H992;F5H6W4;Q9H992-2;C9J159	5	1	17.9918	0.54178	0.126326	1.09029	0.0818095	CM55	PM54	78678.4	E3 ubiquitin-protein ligase MARCH7 OS=Homo sapiens OX=9606 GN=MARCH7 PE=1 SV=1	559.734	406.375	565.582	466.545	438.392	499.912
I3L0A0;Q13404;Q13404-1;Q13404-7;G3V2F7;Q13404-2;A0A0A0MSL3;D6RG00;E5RIF1;H0YBX6;Q13404-6;Q13404-8	4	1	25.0514	0.54617	0.127213	1.08639	0.0810829	PM54	CM55	42779	HCG2044781 OS=Homo sapiens OX=9606 GN=TMEM189-UBE2V1 PE=4 SV=1	404.63	500.763	369.133	544.389	407.337	432.902
P57740;P57740-2;P57740-3	2	1	8.2624	0.546235	0.127213	1.31211	0.0810723	CM55	PM54	107116	Nuclear pore complex protein Nup107 OS=Homo sapiens OX=9606 GN=NUP107 PE=1 SV=1	47.1912	112.604	137.764	120.671	18.9547	87.1522
O95996;O95996-2;O95996-3;A0A0C4DGQ0;B5MDS5;K7ELQ3;K7EN62	3	2	13.4161	0.546708	0.127247	1.13387	0.0809947	PM54	CM55	246116	Adenomatous polyposis coli protein 2 OS=Homo sapiens OX=9606 GN=APC2 PE=1 SV=1	49.0235	238.481	305.696	249.434	221.15	202.03
REVERSE10523	18	3	67.9562	0.549269	0.127767	1.14657	0.0805776	CM55	PM54	279776	Reversed Sequence 10523	129.821	159.931	221.502	182.215	138.277	125.406
P54296;A0A0J9YVV7;E7EWH9	10	1	36.0096	0.553005	0.12856	4.70179	0.0799766	CM55	PM54	166436	Myomesin-2 OS=Homo sapiens OX=9606 GN=MYOM2 PE=1 SV=2	126.641	3.2428	17.5963	5.87836	9.12184	16.3667
Q9P227;Q9P227-2;A0A087WTU4;A0A087WZ73	4	1	23.004	0.553728	0.128651	1.15106	0.0798614	PM54	CM55	163447	Rho GTPase-activating protein 23 OS=Homo sapiens OX=9606 GN=ARHGAP23 PE=1 SV=2	184.121	341.692	247.894	215.3	327.656	347.624
C9JLI6;H0YMV8;Q71UM5;P42677;C9J1C5	4	1	25.2189	0.555447	0.128974	1.01718	0.0795886	PM54	CM55	11227.9	40S ribosomal protein S27 OS=Homo sapiens OX=9606 GN=RPS27L PE=1 SV=1	6897.76	6393.2	6901.57	6709.35	6922.12	6907.89
A0A2R8YD30;P11171;P11171-2;P11171-3;P11171-4;Q4VB86;A0A2R8Y420;A0A2R8Y5G2;A0A2R8Y5Z6;A0A2R8Y7Y3;A0A2R8YCW8;A0A2U3TZH6;P11171-7;A0A2R8Y570;A0A2R8Y5C8;A0A2R8Y6D0;A0A2R8Y6G5;A0A2R8Y7N0;A0A2R8YFR9	3	1	14.4419	0.557657	0.12941	1.33963	0.0792406	PM54	CM55	74067.8	Erythrocyte membrane protein band 4.1 (Elliptocytosis 1_ RH-linked)_ isoform CRA_e OS=Homo sapiens OX=9606 GN=EPB41 PE=1 SV=1	26.3977	133.255	82.315	132.982	47.6662	143.499
REVERSE22083	5	1	21.9107	0.558377	0.129425	1.2685	0.0791278	CM55	PM54	82432.5	Reversed Sequence 22083	192.663	91.6754	221.681	88.9737	205.421	104.518
Q6P2Q9;I3L0J9;I3L3Z8	16	1	83.4401	0.558384	0.129425	1.02823	0.0791268	PM54	CM55	274913	Pre-mRNA-processing-splicing factor 8 OS=Homo sapiens OX=9606 GN=PRPF8 PE=1 SV=2	8.76079	194.858	191.209	136.408	107.736	161.829
Q5JZY3;J3KQG3;Q5JZY3-3;Q5JZY3-2	6	1	32.4714	0.56243	0.130285	1.1586	0.0784994	PM54	CM55	111655	Ephrin type-A receptor 10 OS=Homo sapiens OX=9606 GN=EPHA10 PE=1 SV=2	348.657	50.1728	229.983	266.767	162.322	299.45
REVERSE10323	6	1	23.7842	0.563174	0.130381	1.15294	0.078385	CM55	PM54	371073	Reversed Sequence 10323	298.935	531.02	420.838	410.726	583.767	90.3755
F5GX23;F5H5V4;F5H7X1;J3KN29;O00233;O00233-2	1	1	6.5128	0.564507	0.130612	1.05413	0.0781812	CM55	PM54	20025.6	26S proteasome non-ATPase regulatory subunit 9 OS=Homo sapiens OX=9606 GN=PSMD9 PE=1 SV=1	382.621	363.428	417.544	314.964	369.345	419.533
P49411	3	2	17.8563	0.565502	0.130725	1.03042	0.0780296	PM54	CM55	49883.8	Elongation factor Tu_ mitochondrial OS=Homo sapiens OX=9606 GN=TUFM PE=1 SV=2	1011.2	1114.46	1133.34	1097.57	1069.29	1191.3
REVERSE28264	7	1	26.5621	0.565663	0.130725	1.10719	0.0780051	PM54	CM55	128518	Reversed Sequence 28264	720.132	149.43	345.608	523.714	406.729	414.978
Q02543;M0R0P7;M0R117;M0R1A7;M0R3D6	5	5	25.7553	0.566261	0.130785	1.00654	0.0779144	CM55	PM54	21047.5	60S ribosomal protein L18a OS=Homo sapiens OX=9606 GN=RPL18A PE=1 SV=2	2629.97	2569.51	2595.83	2604.93	2540.43	2599.31
B7Z3B5;F2Z2J1;Q15349;Q15349-2;Q15349-3;A0A2R8Y603;A0A2R8Y7S9;D6R910;D6RHW7;E9PGT3;E9PMM7;Q15418;Q15418-2;Q15418-3;Q15418-4	6	2	34.4772	0.568019	0.131114	1.1444	0.077649	CM55	PM54	73571.4	Non-specific serine/threonine protein kinase OS=Homo sapiens OX=9606 GN=RPS6KA2 PE=1 SV=1	122.397	81.7495	138.507	122.794	78.5644	98.0583
G3V419;Q9UHC1;Q9UHC1-2;G3V3E0	8	1	39.0826	0.568957	0.131253	1.16165	0.0775081	PM54	CM55	145827	DNA mismatch repair protein Mlh3 OS=Homo sapiens OX=9606 GN=MLH3 PE=1 SV=1	375.214	282.315	151.788	239.413	408.513	292.214
C9JMN1;Q96SB8;Q96SB8-2;A0A0A0MRY1	5	1	26.9966	0.569879	0.131388	1.65156	0.0773701	CM55	PM54	85204.3	Structural maintenance of chromosomes protein 6 (Fragment) OS=Homo sapiens OX=9606 GN=SMC6 PE=1 SV=1	157.091	30.8589	60.5898	61.5603	54.983	33.9445
P30084	6	1	33.6271	0.5759	0.132698	1.2665	0.0764815	PM54	CM55	31843.7	Enoyl-CoA hydratase_ mitochondrial OS=Homo sapiens OX=9606 GN=ECHS1 PE=1 SV=4	124.277	319.929	71.5754	314.299	234.074	104.862
REVERSE34130	23	2	99.1997	0.57679	0.132825	1.06583	0.076352	PM54	CM55	138623	Reversed Sequence 34130	792.185	737.424	1036.43	821.087	915.881	997.989
P26640;A0A140T936;A0A140T954;A0A0G2JJT9;A2ABF4;A0A140T904;H0Y426;P26640-2	9	2	49.2191	0.577956	0.133015	1.097	0.0761829	PM54	CM55	141731	Valine--tRNA ligase OS=Homo sapiens OX=9606 GN=VARS PE=1 SV=4	298.252	416.209	613.973	440.52	546.333	470.441
REVERSE26170	4	1	16.8926	0.580327	0.133482	1.10252	0.0758414	PM54	CM55	165551	Reversed Sequence 26170	144.867	196.857	71.8672	148.681	155.126	152.184
Q6TFL3;Q6TFL3-4;Q6TFL3-3;H0Y701;H0Y5M5	6	1	27.1058	0.583137	0.134048	1.20216	0.0754409	PM54	CM55	154179	Coiled-coil domain-containing protein 171 OS=Homo sapiens OX=9606 GN=CCDC171 PE=2 SV=1	52.6084	22.0541	50.5972	63.4477	31.4127	55.7213
P04843;B7Z4L4;F8WF32	17	10	96.084	0.583472	0.134048	1.0398	0.0753935	CM55	PM54	68683.6	Dolichyl-diphosphooligosaccharide--protein glycosyltransferase subunit 1 OS=Homo sapiens OX=9606 GN=RPN1 PE=1 SV=1	960.214	1128.67	1135.56	1058.84	1066.55	975.636
P16070;H0Y2P0;H0YD13;P16070-10;P16070-11;P16070-12;P16070-13;P16070-14;P16070-16;P16070-17;P16070-18;P16070-3;P16070-4;P16070-5;P16070-6;P16070-7;P16070-8;H0YE40;H0Y5E4;H0YCV9;H0YDW7;H0YDX6;P16070-15;P16070-9;E9PKC6;H0YD17;J3KN83;P16070-19;Q86UZ1	8	5	51.5569	0.588189	0.135052	1.01165	0.074732	CM55	PM54	82051	CD44 antigen OS=Homo sapiens OX=9606 GN=CD44 PE=1 SV=3	6986.01	6730.65	6884.2	6842.09	6951.3	6570.28
P78363	7	1	31.2274	0.597595	0.137131	1.08152	0.0734495	CM55	PM54	258396	Retinal-specific ATP-binding cassette transporter OS=Homo sapiens OX=9606 GN=ABCA4 PE=1 SV=3	297.254	229.942	213.002	195.806	227.207	261.39
REVERSE8549	14	2	58.266	0.599199	0.137418	1.13455	0.0732355	CM55	PM54	511121	Reversed Sequence 8549	196.791	256.467	352.047	247.956	250.97	210.875
Q68DQ2;Q68DQ2-1;C9J659;Q68DQ2-2	23	6	132.445	0.600846	0.137715	1.06667	0.0730172	PM54	CM55	333313	Very large A-kinase anchor protein OS=Homo sapiens OX=9606 GN=CRYBG3 PE=1 SV=3	573.979	383.878	363.52	467.288	502.597	439.589
O95747;C9JIG9	4	1	18.6334	0.601402	0.137762	1.04256	0.0729437	PM54	CM55	58307.4	Serine/threonine-protein kinase OSR1 OS=Homo sapiens OX=9606 GN=OXSR1 PE=1 SV=1	450.998	494.503	476.839	502.784	542.17	437.917
Q02790	6	1	33.9005	0.602459	0.137923	1.05746	0.0728047	CM55	PM54	52089.8	Peptidyl-prolyl cis-trans isomerase FKBP4 OS=Homo sapiens OX=9606 GN=FKBP4 PE=1 SV=3	606.865	575.379	494.083	599.205	538.096	447.937
REVERSE3607	10	2	32.4521	0.604562	0.138258	1.03091	0.0725298	PM54	CM55	569701	Reversed Sequence 3607	207.624	184.952	181.565	185.526	196.404	209.957
REVERSE19861	4	1	27.6631	0.60463	0.138258	1.09993	0.0725209	PM54	CM55	80451.2	Reversed Sequence 19861	477.284	159.363	484.705	430.212	369.747	433.451
P17252	2	1	3.6303	0.606075	0.138508	1.23304	0.0723334	CM55	PM54	77890.6	Protein kinase C alpha type OS=Homo sapiens OX=9606 GN=PRKCA PE=1 SV=4	77.5134	161.616	183.936	152.206	134.645	56.2569
A0A0G2JLW6;A0A0J9YY63;A0A1B0GTN4;Q9P1A6;Q9P1A6-3;A0A0G2JPE0;A0A0J9YX70;A0A1B0GXK6;H0YBY6;Q9P1A6-2;A0A0J9YY16	8	3	41.3357	0.608377	0.138952	1.02121	0.0720369	PM54	CM55	110080	Disks large-associated protein 2 OS=Homo sapiens OX=9606 GN=DLGAP2 PE=1 SV=2	17130.5	16289.7	16646.4	16787.5	16208.2	18133
P50579;G3V1U3;F8VQZ7;F8VRR3;F8VSC4;F8VY03;F8VZX9;P50579-2	3	1	12.191	0.609128	0.138969	1.10209	0.0719408	PM54	CM55	53747.1	Methionine aminopeptidase 2 OS=Homo sapiens OX=9606 GN=METAP2 PE=1 SV=1	419.797	203.241	418.118	323.007	438.258	386.178
REVERSE154	2	1	8.7994	0.609163	0.138969	2.83525	0.0719363	CM55	PM54	135542	Reversed Sequence 154	20.8489	282.739	354.937	84.4427	73.1708	74.6506
Q9BUB5	2	1	7.8663	0.612413	0.139585	1.11356	0.0715236	PM54	CM55	52083.8	MAP kinase-interacting serine/threonine-protein kinase 1 OS=Homo sapiens OX=9606 GN=MKNK1 PE=1 SV=1	321.006	240.754	218.344	358.301	218.54	291.848
O43242;O43242-2	8	3	53.9	0.612576	0.139585	1.03695	0.0715032	PM54	CM55	61091.7	26S proteasome non-ATPase regulatory subunit 3 OS=Homo sapiens OX=9606 GN=PSMD3 PE=1 SV=2	395.832	491.536	417.714	474.038	425.617	453.645
A0A0C4DG86;Q9NX95;Q9NX95-2;Q9NX95-3;Q9NX95-4;B3KRD1;B7Z4D2;E9PL66;E9PLB9;E9PN31;E9PNN9;Q9NX95-5	2	1	8.7533	0.614678	0.139942	1.82874	0.0712392	CM55	PM54	73795.4	Syntabulin OS=Homo sapiens OX=9606 GN=SYBU PE=1 SV=1	13.6047	98.2712	65.5867	34.0146	39.0755	23.9509
P18621;A0A087WXM6;A0A0A6YYL6;J3KRX5;J3QQT2;P18621-3;A0A0A0MRF8;J3QLC8;P18621-2;A0A087WWH0;J3KRB3;J3QS96;A0A087WY81;J3KSJ0	7	5	55.268	0.614857	0.139942	1.01408	0.0712168	CM55	PM54	21625.2	60S ribosomal protein L17 OS=Homo sapiens OX=9606 GN=RPL17 PE=1 SV=3	1584.48	1631.15	1560.85	1503.38	1580.84	1625.94
M0QXB5;O95571;M0QY80	2	1	12.3314	0.619841	0.140918	1.06073	0.0706002	PM54	CM55	28900.7	Persulfide dioxygenase ETHE1_ mitochondrial OS=Homo sapiens OX=9606 GN=ETHE1 PE=1 SV=1	344.266	500.985	525.683	451.04	490.217	512.932
E9PJC6;E9PJZ0;E9PKR9;E9PLK4;E9PQE3;Q09666-2	1	1	7.9274	0.619869	0.140918	1.03223	0.0705969	CM55	PM54	14645.3	Neuroblast differentiation-associated protein AHNAK OS=Homo sapiens OX=9606 GN=AHNAK PE=1 SV=1	2439.42	2206.69	2637.91	2336.91	2286.77	2432.94
E9PK47;P06737;P06737-2	6	1	28.323	0.622585	0.141453	1.0135	0.0702662	PM54	CM55	94469.6	Alpha-1_4 glucan phosphorylase OS=Homo sapiens OX=9606 GN=PYGL PE=1 SV=1	1492.52	1530.25	1504.57	1464.3	1539	1585.16
REVERSE22975	1	1	3.2219	0.627581	0.142506	1.09089	0.0696669	CM55	PM54	44414.8	Reversed Sequence 22975	214.541	168.65	138.218	143.478	179.874	154.617
REVERSE39875	7	1	28.1311	0.630812	0.143156	1.08428	0.0692859	PM54	CM55	240035	Reversed Sequence 39875	349.582	96.8655	149.221	267.048	166.436	212.39
REVERSE22575	6	1	24.2046	0.631677	0.143269	1.03436	0.0691847	CM55	PM54	197851	Reversed Sequence 22575	2724.28	2653.37	2422.64	2502.34	2780.2	2258.64
Q8WUY3;A0A088AWP5;E9PDC2;Q8WUY3-2;Q8WUY3-3;Q8WUY3-4	9	2	36.9144	0.634212	0.143761	1.02906	0.0688902	PM54	CM55	342746	Protein prune homolog 2 OS=Homo sapiens OX=9606 GN=PRUNE2 PE=1 SV=3	1001.96	1064.71	888.546	1000.18	1067.14	973.766
A0A087WUL9;Q9UNM6;J3KNQ3;Q9UNM6-2;E9PPD2;E9PQG3	3	1	16.7976	0.63753	0.144429	1.34019	0.0685092	CM55	PM54	43024.5	26S proteasome non-ATPase regulatory subunit 13 OS=Homo sapiens OX=9606 GN=PSMD13 PE=1 SV=1	108.533	84.0406	0	78.1298	19.8441	45.7171
REVERSE17641	4	2	19.4864	0.639207	0.144701	1.01505	0.0683186	PM54	CM55	81811.4	Reversed Sequence 17641	11401.1	10573.6	10591.6	10686.9	11031.3	11338.2
P26006;P26006-1;D6R9X8;H0YA49	7	3	43.6643	0.63947	0.144701	1.04649	0.068289	PM54	CM55	117810	Integrin alpha-3 OS=Homo sapiens OX=9606 GN=ITGA3 PE=1 SV=5	953.295	939.33	736.013	954.266	970.457	826.109
Q8IY18	5	1	20.726	0.641625	0.145104	1.08796	0.0680461	CM55	PM54	130061	Structural maintenance of chromosomes protein 5 OS=Homo sapiens OX=9606 GN=SMC5 PE=1 SV=2	81.3767	116.748	99.3832	85.6459	62.3037	125.507
B1APE1;Q00403	1	1	3.7744	0.645593	0.145917	1.16229	0.0676047	CM55	PM54	25558.8	Transcription initiation factor IIB (Fragment) OS=Homo sapiens OX=9606 GN=GTF2B PE=1 SV=1	121.748	67.6095	63.1238	52.8515	95.2511	69.1239
Q14839;A0A0C4DGG9;A0A2R8Y212;A0A2R8Y425;A0A2R8Y521;A0A2R8Y5J0;A0A2R8YD40;A0A2R8YDJ9;A0A2R8YFD8;A0A2R8YFK9;A0A2U3TZM0;F5GWX5;Q14839-2;A0A2R8Y4X2;A0A2R8YDW2;A0A2R8Y7I0;A0A2R8Y7M9;A0A2R8Y8C1;A0A2R8YER1;A0A2R8Y5M9;A0A2R8Y5Z7;A0A2R8YE38;A0A2R8Y685;A0A2R8Y7X1	7	3	28.9085	0.648537	0.146438	1.02518	0.0672817	CM55	PM54	219545	Chromodomain-helicase-DNA-binding protein 4 OS=Homo sapiens OX=9606 GN=CHD4 PE=1 SV=2	431.265	480.532	439.235	414.133	472.504	431.216
A0A087WUH9;Q9NYY3	3	1	12.2324	0.648645	0.146438	1.06408	0.06727	CM55	PM54	77734.6	Serine/threonine-protein kinase PLK OS=Homo sapiens OX=9606 GN=PLK2 PE=1 SV=1	601.349	493.378	628.18	687.775	443.591	487.782
REVERSE6850	4	1	18.9735	0.649704	0.146592	1.02409	0.0671548	PM54	CM55	137983	Reversed Sequence 6850	525.206	471.16	561.976	540.672	516.243	538.974
A6NLN1;K7ES59	6	1	37.192	0.650333	0.146649	1.03761	0.0670866	CM55	PM54	56624.7	Polypyrimidine tract binding protein 1_ isoform CRA_b OS=Homo sapiens OX=9606 GN=PTBP1 PE=1 SV=4	452.01	34.8302	465.136	352.059	351.829	213.584
D6RAP2;Q15399	2	1	8.9333	0.652725	0.147099	1.10355	0.0668289	PM54	CM55	18666.8	Toll-like receptor 1 (Fragment) OS=Homo sapiens OX=9606 GN=TLR1 PE=1 SV=1	567.513	843.777	519.165	656.913	912.904	560.543
REVERSE21801	4	1	21.2414	0.653079	0.147099	1.0626	0.066791	PM54	CM55	102837	Reversed Sequence 21801	142.891	194.344	282.933	202.833	221.305	234.854
Q15907;Q15907-2;H3BMH2;H3BSC1;P62491;P62491-2;M0R2D0	7	3	36.2276	0.655468	0.147552	1.08207	0.0665366	CM55	PM54	24602.6	Ras-related protein Rab-11B OS=Homo sapiens OX=9606 GN=RAB11B PE=1 SV=4	247.833	178.305	179.322	175.954	240.982	142.602
REVERSE531	12	2	47.4705	0.658751	0.148206	1.06772	0.066191	PM54	CM55	362591	Reversed Sequence 531	894.199	619.238	719.952	951.111	711.665	721.863
A0A0A0MRM8;A0A0D9SGC1;E7EW20;Q9UM54;Q9UM54-1;Q9UM54-2;Q9UM54-4;Q9UM54-5;Q9UM54-6	9	3	37.2703	0.662062	0.148865	1.05595	0.0658472	CM55	PM54	146385	Unconventional myosin-VI OS=Homo sapiens OX=9606 GN=MYO6 PE=1 SV=1	393.248	296.364	397.644	342.453	336.889	350.302
REVERSE590	5	1	18.1184	0.669807	0.15052	1.06537	0.0650611	PM54	CM55	165346	Reversed Sequence 590	250.652	148.387	251.96	238.698	254.55	200.307
P62249;M0R210;M0R3H0;Q6IPX4;M0R1M5;M0QX76	10	6	57.6003	0.670965	0.150693	1.01455	0.0649458	PM54	CM55	16559.4	40S ribosomal protein S16 OS=Homo sapiens OX=9606 GN=RPS16 PE=1 SV=2	2456.37	2229.02	2250.7	2401.81	2302.45	2332.72
Q9Y6X9;Q9Y6X9-2	4	1	15.3006	0.672967	0.151056	1.11297	0.0647477	CM55	PM54	118622	MORC family CW-type zinc finger protein 2 OS=Homo sapiens OX=9606 GN=MORC2 PE=1 SV=2	468.298	667.983	835.763	554	729.83	488.051
G3V3M6;G3V5Q1;P27695;A0A0C4DGK8;G3V359;G3V3C7;G3V5D9;G3V5M0;H7C4A8	2	1	12.2824	0.678073	0.152115	1.03994	0.0642498	PM54	CM55	29475.2	DNA-(apurinic or apyrimidinic site) lyase (Fragment) OS=Homo sapiens OX=9606 GN=APEX1 PE=1 SV=1	741.087	881.418	1108.2	944.73	973.628	921.398
P17931;G3V3R6	3	1	17.4791	0.679076	0.152252	1.04591	0.0641534	PM54	CM55	26209.4	Galectin-3 OS=Homo sapiens OX=9606 GN=LGALS3 PE=1 SV=5	661.197	735.873	644.575	820.772	623.335	691.266
A0A0C4DGR2;M0QY25;M0QYH7;M0QYQ4;Q86YD1;Q86YD1-2	1	1	4.6475	0.67972	0.152309	1.06573	0.0640916	PM54	CM55	41915.2	Prostate tumor overexpressed gene 1_ isoform CRA_d OS=Homo sapiens OX=9606 GN=PTOV1 PE=1 SV=1	104.062	27.1944	68.6857	55.0731	87.5747	70.4356
A0A087WW63;A0A1B0GTN7;A0A1B0GTW2;A0A1B0GU81;A0A1C7CYY9;O00555;O00555-4;A0A1B0GTI4;A0A1B0GU74;A0A1B0GUS3;A0A1B0GVQ9;B5TYJ1;O00555-2;O00555-3;O00555-6;O00555-5;K7EKF7;K7EQ95;A0A1B0GUM7;A0A1B0GUP3;A0A1B0GVX1	9	1	41.197	0.684405	0.153271	1.06341	0.0636473	CM55	PM54	284729	Voltage-dependent P/Q-type calcium channel subunit alpha OS=Homo sapiens OX=9606 GN=CACNA1A PE=1 SV=1	83.1481	110.788	86.9303	98.7799	66.189	99.1492
F8VV56;P08962;P08962-2;P08962-3;F8VNT9;F8VWK8;F8W022	2	1	8.7837	0.685783	0.153492	1.05093	0.0635182	PM54	CM55	16476.9	CD63 antigen OS=Homo sapiens OX=9606 GN=CD63 PE=1 SV=1	240.931	223.284	231.132	205.44	283.42	241.9
REVERSE5092	9	2	32.2744	0.687818	0.153859	1.02035	0.0633292	CM55	PM54	351120	Reversed Sequence 5092	1135.83	1019.1	1066.01	1104.86	982.17	1069.66
REVERSE18298	1	1	4.0507	0.691712	0.154626	1.04929	0.0629717	PM54	CM55	60702.7	Reversed Sequence 18298	872.77	714.214	557.803	664.971	816.358	769.181
Q8IY33	3	1	12.1447	0.692037	0.154626	1.08646	0.0629422	PM54	CM55	98300.7	MICAL-like protein 2 OS=Homo sapiens OX=9606 GN=MICALL2 PE=1 SV=1	49.8603	91.5844	81.4746	81.2913	98.75	62.1512
Q9Y536;A0A075B759	6	2	28.6964	0.695761	0.155369	1.01828	0.0626065	PM54	CM55	18409.9	Peptidyl-prolyl cis-trans isomerase A-like 4A OS=Homo sapiens OX=9606 GN=PPIAL4A PE=2 SV=1	1309.72	1349.66	1231	1246.37	1394.83	1320.28
Q68CP9;Q68CP9-3;F8W108;F8WCU9	5	1	20.2378	0.699939	0.156161	1.05182	0.0622363	PM54	CM55	199045	AT-rich interactive domain-containing protein 2 OS=Homo sapiens OX=9606 GN=ARID2 PE=1 SV=2	1465.4	1255.68	908.607	1219.97	1150.59	1447.21
Q9Y6N7;Q9Y6N7-2;A0A087WTM1;Q9Y6N7-3;Q9Y6N7-4;Q9Y6N7-5;A0A087WZ85;A0A0A0MSX4;Q9Y6N7-6	6	2	28.0051	0.700108	0.156161	1.43482	0.0622215	CM55	PM54	182070	Roundabout homolog 1 OS=Homo sapiens OX=9606 GN=ROBO1 PE=1 SV=1	164.356	132.027	34.5021	55.3149	115.292	60.0044
A0A1W2PQT5;A0A1W2PRK7;P05093;A0A1W2PQ28	3	1	11.7138	0.703817	0.156899	1.1229	0.0618986	CM55	PM54	54163.6	Steroid 17-alpha-hydroxylase/17_20 lyase OS=Homo sapiens OX=9606 GN=CYP17A1 PE=1 SV=1	739.037	384.26	482.636	478.816	445.726	505.62
REVERSE7403	3	1	12.7461	0.706217	0.157345	1.05479	0.0616925	CM55	PM54	121485	Reversed Sequence 7403	124.089	146.073	112.54	159.763	66.6443	136.414
REVERSE76749	2	1	8.897	0.710472	0.158202	1.33667	0.0613324	CM55	PM54	18032.3	Reversed Sequence 76749	10.447	251.621	578.631	157.256	344.859	126.836
O15511;B1ALC0;O15511-2	7	5	26.0855	0.711739	0.158394	1.01925	0.0612264	CM55	PM54	16377.5	Actin-related protein 2/3 complex subunit 5 OS=Homo sapiens OX=9606 GN=ARPC5 PE=1 SV=3	1079.92	1028.34	974.038	1056.05	929.92	1038.11
Q53GQ0;A0A1B0GV93;A0A1B0GVY6;E9PI21	4	1	25.5254	0.714023	0.158812	14.5073	0.061037	CM55	PM54	34438.3	Very-long-chain 3-oxoacyl-CoA reductase OS=Homo sapiens OX=9606 GN=HSD17B12 PE=1 SV=2	0	101.68	480.373	7.93734	16.6387	15.5454
P34932;A0A087WYC1;A0A087WTS8;P34932-2	19	11	126.483	0.714854	0.158906	1.01934	0.0609685	PM54	CM55	95186.5	Heat shock 70 kDa protein 4 OS=Homo sapiens OX=9606 GN=HSPA4 PE=1 SV=4	1755.45	1933.1	1615.09	1865.91	1760.65	1779.68
REVERSE25327	4	1	25.7041	0.720122	0.159986	1.2489	0.0605405	CM55	PM54	89012.9	Reversed Sequence 25327	39.1089	104.499	28.0259	64.4551	15.2408	57.7326
P46783;A0A1W2PQS6;A0A2R8Y6L3;A0A2R8Y7H1;A0A2R8YFH6;F6U211;Q9NQ39	3	2	27.4774	0.722566	0.160438	1.01597	0.0603453	PM54	CM55	18897.8	40S ribosomal protein S10 OS=Homo sapiens OX=9606 GN=RPS10 PE=1 SV=1	662.915	569.414	585.316	615.531	608.166	622.984
Q9BRF8;Q9BRF8-2;Q9BRF8-3	2	1	11.0086	0.723151	0.160477	1.00358	0.060299	PM54	CM55	35890.5	Serine/threonine-protein phosphatase CPPED1 OS=Homo sapiens OX=9606 GN=CPPED1 PE=1 SV=3	190.247	50.6705	310.406	216.126	125.109	212.064
Q86UQ4;A0A0A0MT16;Q86UQ4-4;F5H7B7;Q86UQ4-3;Q86UQ4-5;Q86UQ4-6;Q86UQ4-7;H7C0U5	25	3	109.018	0.726667	0.161166	1.04316	0.0600227	CM55	PM54	580894	ATP-binding cassette sub-family A member 13 OS=Homo sapiens OX=9606 GN=ABCA13 PE=2 SV=3	604.392	467.971	487.298	490.59	571.025	433.509
P26639;P26639-2	4	1	22.0041	0.732571	0.162383	1.11925	0.0595688	CM55	PM54	84347.7	Threonine--tRNA ligase_ cytoplasmic OS=Homo sapiens OX=9606 GN=TARS PE=1 SV=3	189.055	142.143	92.7389	136.28	89.3107	153.179
P55060;P55060-3;P55060-4;P55060-2	6	2	35.5697	0.735001	0.162829	1.02259	0.0593855	PM54	CM55	111215	Exportin-2 OS=Homo sapiens OX=9606 GN=CSE1L PE=1 SV=3	497.005	643.017	537.931	568.51	560.987	586.368
Q5VT06;H0Y7F7;E9PIK0;A2A4F6;Q5T2X4	23	1	104.082	0.738571	0.163527	1.0234	0.05912	CM55	PM54	352527	Centrosome-associated protein 350 OS=Homo sapiens OX=9606 GN=CEP350 PE=1 SV=1	1055.97	1202.32	1264.11	1184.9	1098.53	1158.43
Q96JY6-5	1	1	5.9483	0.74006	0.163764	2.42746	0.0590106	CM55	PM54	63315.9	Isoform 5 of PDZ and LIM domain protein 2 OS=Homo sapiens OX=9606 GN=PDLIM2	8.90608	182.179	161.496	39.6042	28.9085	76.7342
Q3KR16	2	1	7.9882	0.742075	0.164117	1.12246	0.0588637	PM54	CM55	89359.5	Pleckstrin homology domain-containing family G member 6 OS=Homo sapiens OX=9606 GN=PLEKHG6 PE=1 SV=3	169.922	129.823	74.985	208.277	109.641	102.702
Q9HC98;Q9HC98-2;Q9HC98-3;Q9HC98-4;Q5TBG1;Q5TBG7;Q5TBH1;Q5TBH2;Q5TBH0	4	1	19.1269	0.743876	0.164423	1.06396	0.0587336	CM55	PM54	36284.7	Serine/threonine-protein kinase Nek6 OS=Homo sapiens OX=9606 GN=NEK6 PE=1 SV=2	131.948	205.375	176.129	160.379	154.371	167.835
REVERSE25130	5	1	27.1782	0.748466	0.165344	1.09881	0.058407	CM55	PM54	134067	Reversed Sequence 25130	114.194	154.503	213.215	153.203	136.939	148.432
P46776;E9PJD9;E9PLL6;E9PLX7	8	6	48.4214	0.749027	0.165374	1.01227	0.0583677	CM55	PM54	16675.5	60S ribosomal protein L27a OS=Homo sapiens OX=9606 GN=RPL27A PE=1 SV=2	2031.11	2210.08	2034.12	2012.65	2036.68	2149.89
P38606;P38606-2;C9JA17;C9JVW8	7	2	47.9652	0.749621	0.165412	1.02306	0.058326	PM54	CM55	68703.4	V-type proton ATPase catalytic subunit A OS=Homo sapiens OX=9606 GN=ATP6V1A PE=1 SV=2	950.124	855.692	1131.78	961.729	1041.64	1001.96
REVERSE3146	6	1	21.8373	0.754384	0.166369	1.02668	0.0579966	CM55	PM54	201226	Reversed Sequence 3146	1025.85	1055.19	1190.42	1084.99	1188.8	912.663
REVERSE21260	4	1	18.2331	0.7572	0.166896	1.03867	0.0578053	CM55	PM54	44516.4	Reversed Sequence 21260	380.914	401.297	509.189	416.034	424.302	402.987
Q7Z7M9	4	1	14.9655	0.759938	0.167405	1.0425	0.057622	CM55	PM54	107122	Polypeptide N-acetylgalactosaminyltransferase 5 OS=Homo sapiens OX=9606 GN=GALNT5 PE=1 SV=1	306.889	375.506	419.209	362.547	300.603	393.545
Q9Y3I0	2	1	8.914	0.762153	0.167798	1.0077	0.0574755	CM55	PM54	55723.7	tRNA-splicing ligase RtcB homolog OS=Homo sapiens OX=9606 GN=RTCB PE=1 SV=1	2393.93	2348.92	2406.57	2393.75	2445.56	2255.49
P49591;Q5T5C7	8	4	43.6836	0.762788	0.167843	1.03353	0.0574337	CM55	PM54	59290.6	Serine--tRNA ligase_ cytoplasmic OS=Homo sapiens OX=9606 GN=SARS PE=1 SV=3	634.033	532.729	693.708	581.67	561.88	656.555
P98160	9	1	42.4	0.765773	0.168365	1.01551	0.0572394	CM55	PM54	479552	Basement membrane-specific heparan sulfate proteoglycan core protein OS=Homo sapiens OX=9606 GN=HSPG2 PE=1 SV=4	1976.68	1995.34	1789.53	1778.24	1904.37	1990.94
REVERSE29574	5	3	24.103	0.766022	0.168365	1.04093	0.0572233	PM54	CM55	162041	Reversed Sequence 29574	212.535	259.422	347.874	238.427	318.783	296.175
A0A087X1C2;A0A1W2PQA1;L0B1V4;L0B3M6;L0B3Z2;Q13127;Q13127-2;Q13127-3;Q13127-4	1	1	4.1832	0.767718	0.168643	6.38534	0.0571144	CM55	PM54	38919	RE1-silencing transcription factor_ isoform CRA_a OS=Homo sapiens OX=9606 GN=REST PE=1 SV=1	0	59.8239	114.214	11.8475	9.68468	5.72371
P62820;E7END7;P62820-2;P62820-3	8	1	79.6813	0.773658	0.169852	1.01027	0.0567401	PM54	CM55	22905.9	Ras-related protein Rab-1A OS=Homo sapiens OX=9606 GN=RAB1A PE=1 SV=3	3249.98	2919.52	3000.41	3089.87	3170.95	3003.27
Q9BXB7	3	1	16.8124	0.774985	0.170048	1.16105	0.056658	CM55	PM54	65605.8	Spermatogenesis-associated protein 16 OS=Homo sapiens OX=9606 GN=SPATA16 PE=1 SV=3	237.268	29.5844	371.581	233.748	198.051	118.079
O14976;O14976-2	6	1	31.9652	0.777315	0.170464	1.03249	0.0565152	CM55	PM54	144673	Cyclin-G-associated kinase OS=Homo sapiens OX=9606 GN=GAK PE=1 SV=2	277.889	230.975	285.558	273.298	295.986	200.137
P16591;A0A0D9SEV4	3	1	13.1302	0.783356	0.171692	1.28348	0.0561531	CM55	PM54	95265.4	Tyrosine-protein kinase Fer OS=Homo sapiens OX=9606 GN=FER PE=1 SV=2	10.2366	160.771	143.731	98.3648	67.6319	79.2253
Q92538;Q92538-2;Q92538-3	5	2	22.0923	0.786671	0.172322	1.04426	0.0559593	PM54	CM55	208499	Golgi-specific brefeldin A-resistance guanine nucleotide exchange factor 1 OS=Homo sapiens OX=9606 GN=GBF1 PE=1 SV=2	209.107	99.4552	89.5032	174.368	143.303	98.0122
Q9Y6D5	6	2	21.4289	0.78898	0.172731	1.03487	0.0558263	PM54	CM55	204548	Brefeldin A-inhibited guanine nucleotide-exchange protein 2 OS=Homo sapiens OX=9606 GN=ARFGEF2 PE=1 SV=3	172.753	108.256	200.686	174.087	138.322	186.081
P26373;P26373-2;H3BTH3;J3QSB4	5	4	18.6387	0.793477	0.173563	1.00556	0.0555722	PM54	CM55	24318.5	60S ribosomal protein L13 OS=Homo sapiens OX=9606 GN=RPL13 PE=1 SV=4	1574.32	1516.91	1506.89	1497.79	1558.17	1567.72
Q8ND71	3	1	17.137	0.793792	0.173563	1.07594	0.0555546	PM54	CM55	75745.7	GTPase IMAP family member 8 OS=Homo sapiens OX=9606 GN=GIMAP8 PE=2 SV=2	158.678	138.195	63.718	139.512	167.814	80.6473
A0A1B0GTU4;F5GZ78;P49023;P49023-2;P49023-3;P49023-4;A0A1B0GV30;A0A1B0GU60	6	1	30.9698	0.794114	0.173563	1.03457	0.0555366	CM55	PM54	117845	Paxillin OS=Homo sapiens OX=9606 GN=PXN PE=1 SV=1	992.94	1336.93	1215.46	1040.85	1318.84	1067.16
C9JVY5;Q9Y2D5;Q9Y2D5-4;Q9Y2D5-5;Q9Y2D5-6;Q9Y2D5-7	4	1	19.5123	0.798051	0.174327	1.02486	0.0553199	CM55	PM54	85625.4	A-kinase anchor protein 2 (Fragment) OS=Homo sapiens OX=9606 GN=AKAP2 PE=1 SV=1	3119.03	3030.47	2545.52	3077.01	2918.4	2488.74
Q86VP6;Q86VP6-2;A0A0C4DGH5;H0YH27;Q86VP6-3	16	4	78.6775	0.799853	0.174622	1.05417	0.0552224	CM55	PM54	138087	Cullin-associated NEDD8-dissociated protein 1 OS=Homo sapiens OX=9606 GN=CAND1 PE=1 SV=2	421.143	389.626	272.847	385.863	282.977	359.088
Q9Y4P3;E9PF19;Q96E41;A0A087WXC6	5	1	23.8097	0.800876	0.174748	1.01974	0.0551674	PM54	CM55	50425.2	Transducin beta-like protein 2 OS=Homo sapiens OX=9606 GN=TBL2 PE=1 SV=1	412.661	399.066	289.099	390.506	373.624	358.421
P62906	4	3	24.3901	0.802619	0.175031	1.01481	0.0550744	PM54	CM55	25002.4	60S ribosomal protein L10a OS=Homo sapiens OX=9606 GN=RPL10A PE=1 SV=2	1713.4	1891.48	2017.94	1879.1	2027.14	1799.84
REVERSE4181	3	1	12.711	0.80544	0.175548	1.08241	0.054926	CM55	PM54	101131	Reversed Sequence 4181	1890.09	3767.15	2382.72	2687.19	1608.86	3131.81
O60522;O60522-2	9	2	35.5821	0.805977	0.175567	1.01898	0.0548981	PM54	CM55	239996	Tudor domain-containing protein 6 OS=Homo sapiens OX=9606 GN=TDRD6 PE=2 SV=2	327.862	513.811	355.562	382.258	406.865	430.838
Q01518;Q01518-2;Q5T0R1;Q5T0R2;Q5T0R3;Q5T0R4;Q5T0R5;Q5T0R6;Q5T0R7;Q5T0R9	20	15	122.241	0.812858	0.176967	1.01866	0.0545471	CM55	PM54	52357.8	Adenylyl cyclase-associated protein 1 OS=Homo sapiens OX=9606 GN=CAP1 PE=1 SV=5	8445.42	9133.71	10067	8921.21	8246.56	9971.94
Q9NXL9	1	1	3.594	0.817191	0.177812	1.33492	0.0543334	PM54	CM55	128796	DNA helicase MCM9 OS=Homo sapiens OX=9606 GN=MCM9 PE=1 SV=4	36.1586	25.3007	46.935	69.362	60.2622	15.0737
Q14974;Q14974-2;J3KTM9;J3QR48;J3QKQ5;J3QRG4	12	7	81.7109	0.823922	0.179177	1.00931	0.0540123	PM54	CM55	98482	Importin subunit beta-1 OS=Homo sapiens OX=9606 GN=KPNB1 PE=1 SV=2	2099.93	2082.48	2373.91	2214.34	2264.5	2138.52
O60603	2	1	7.2608	0.827966	0.179956	1.0364	0.0538258	CM55	PM54	90978.3	Toll-like receptor 2 OS=Homo sapiens OX=9606 GN=TLR2 PE=1 SV=1	229.48	264.358	330.886	247.816	237.617	310.326
Q14677;Q14677-3	1	1	3.9283	0.830338	0.180349	1.03738	0.0537186	CM55	PM54	68316.7	Clathrin interactor 1 OS=Homo sapiens OX=9606 GN=CLINT1 PE=1 SV=1	827.15	1153.03	842.091	928.307	921.089	871.181
REVERSE33140	6	1	25.9083	0.8307	0.180349	1.01904	0.0537024	PM54	CM55	152062	Reversed Sequence 33140	70.8987	111.711	91.2692	92.8593	102.274	83.9607
O75582;O75582-3;O75582-2	3	1	16.4413	0.834486	0.180974	1.06957	0.053535	CM55	PM54	90435.8	Ribosomal protein S6 kinase alpha-5 OS=Homo sapiens OX=9606 GN=RPS6KA5 PE=1 SV=1	643.083	688.646	394.976	498.475	553.936	561.975
O14979;A0A087WUK2;O14979-2;O14979-3	7	1	30.8224	0.834917	0.180974	1.04132	0.0535162	CM55	PM54	46608.7	Heterogeneous nuclear ribonucleoprotein D-like OS=Homo sapiens OX=9606 GN=HNRNPDL PE=1 SV=3	67.4389	196.341	235.973	169.828	144.376	165.717
P20042	2	1	14.0872	0.834966	0.180974	1.01494	0.0535141	CM55	PM54	38730.6	Eukaryotic translation initiation factor 2 subunit 2 OS=Homo sapiens OX=9606 GN=EIF2S2 PE=1 SV=2	632.463	704.966	725.057	596.552	682.379	753.2
P27105;F8VSL7;P27105-2	6	1	34.7079	0.836275	0.181157	1.02964	0.0534574	CM55	PM54	31901.9	Erythrocyte band 7 integral membrane protein OS=Homo sapiens OX=9606 GN=STOM PE=1 SV=3	5351.04	3889.19	4460.36	4873.47	4250.57	4182.08
P08729;A0A1W2PRP1	11	2	76.1674	0.836749	0.181159	1.00711	0.053437	CM55	PM54	51442.8	Keratin_ type II cytoskeletal 7 OS=Homo sapiens OX=9606 GN=KRT7 PE=1 SV=5	1135.68	1224.32	1224.98	1194.76	1146.67	1218.24
O75962;O75962-2;O75962-4;E7EPJ7;O75962-3	17	1	64.9946	0.837265	0.181171	1.14391	0.0534148	CM55	PM54	349980	Triple functional domain protein OS=Homo sapiens OX=9606 GN=TRIO PE=1 SV=2	116.867	50.8144	149.02	120.86	57.0642	98.9348
C9JLV4;O14727;O14727-2;O14727-3;O14727-4;O14727-5	2	1	8.4197	0.838412	0.181319	1.0964	0.0533658	CM55	PM54	134575	Apoptotic protease-activating factor 1 OS=Homo sapiens OX=9606 GN=APAF1 PE=1 SV=1	511.858	1026.07	588.689	584.519	654.013	701.097
REVERSE84070	3	1	12.318	0.839034	0.181353	1.20155	0.0533395	CM55	PM54	237561	Reversed Sequence 84070	214.891	32.402	30.4728	35.532	99.3174	96.3244
Q9H2P0	2	1	8.1601	0.840742	0.181621	1.07475	0.0532675	CM55	PM54	124932	Activity-dependent neuroprotector homeobox protein OS=Homo sapiens OX=9606 GN=ADNP PE=1 SV=1	75.7388	122.085	66.8078	85.8245	70.3029	90.0994
P07942;G3XAI2;E7EPA6	8	1	32.6971	0.84134	0.181641	1.01097	0.0532425	CM55	PM54	205281	Laminin subunit beta-1 OS=Homo sapiens OX=9606 GN=LAMB1 PE=1 SV=2	629.907	618.241	561.54	642.327	568.785	578.948
P00505;P00505-2	9	2	57.2561	0.841763	0.181641	1.00588	0.0532249	CM55	PM54	47916.9	Aspartate aminotransferase_ mitochondrial OS=Homo sapiens OX=9606 GN=GOT2 PE=1 SV=3	809.242	853.641	803.048	797.996	849.834	803.682
P56537;A0A0B4J1Y7;B7ZBH1;F8WD20;F8WDS6;P56537-2	2	1	6.6889	0.84281	0.181767	1.029	0.0531816	CM55	PM54	27112.4	Eukaryotic translation initiation factor 6 OS=Homo sapiens OX=9606 GN=EIF6 PE=1 SV=1	1228.9	1184.02	911.53	1156.7	989.926	1084.13
Q9NR30;Q9NR30-2	8	2	36.2235	0.843445	0.181803	1.09354	0.0531554	CM55	PM54	87857.8	Nucleolar RNA helicase 2 OS=Homo sapiens OX=9606 GN=DDX21 PE=1 SV=5	341.485	166.52	346.278	308.013	183.567	289.625
A0A087WV00;E9PFX6;O75912;E7EM72;E7EWQ4	4	1	19.5409	0.844753	0.181985	1.05203	0.0531019	PM54	CM55	106235	Diacylglycerol kinase OS=Homo sapiens OX=9606 GN=DGKI PE=1 SV=1	118.482	51.3019	127.365	117.107	62.9605	132.542
P15153	6	2	28.4088	0.845284	0.181999	1.01397	0.0530803	PM54	CM55	21828	Ras-related C3 botulinum toxin substrate 2 OS=Homo sapiens OX=9606 GN=RAC2 PE=1 SV=1	330.902	311.143	278.757	338.829	289.327	305.514
P20339;P20339-2;F8VUA5;F8VVK3;F8VVZ0;F8VWU4;P61020;P61020-2;F8VSF8	10	6	43.1088	0.848086	0.182502	1.01107	0.0529677	PM54	CM55	23886.8	Ras-related protein Rab-5A OS=Homo sapiens OX=9606 GN=RAB5A PE=1 SV=2	1460.42	1542.2	1519.53	1582.53	1395.44	1594.24
Q8WVC0;Q8WVC0-2	1	1	4.7454	0.852557	0.183363	1.01087	0.0527926	PM54	CM55	75518.2	RNA polymerase-associated protein LEO1 OS=Homo sapiens OX=9606 GN=LEO1 PE=1 SV=1	15604.5	15655.1	14471.4	16005.2	14147.2	16075.8
J3KPX7;Q99623;Q99623-2;F5GY37;F5H3X6;F5GWA7;F5H0C5;F5H2D2	6	3	42.0881	0.853163	0.183392	1.01151	0.0527692	CM55	PM54	33239.4	Prohibitin-2 OS=Homo sapiens OX=9606 GN=PHB2 PE=1 SV=2	533.61	496.351	474.252	563.208	467.755	456.133
Q9BTM1;A0A0U1RR32;A0A0U1RRH7;P0C0S8;P20671;Q16777;Q6FI13;Q96KK5;Q99878;H0YFX9;P04908;Q7L7L0;Q93077;Q9BTM1-2;C9J0D1;P16104;Q71UI9-2;Q96QV6;C9J386;Q71UI9-5;Q8IUE6	10	7	60.1529	0.857519	0.184158	1.00954	0.0526048	CM55	PM54	14019.4	Histone H2A.J OS=Homo sapiens OX=9606 GN=H2AFJ PE=1 SV=1	22601.2	25535.2	25334	24570.7	23414.6	24790.6
Q9BX66;Q9BX66-11	1	1	8.4786	0.857667	0.184158	1.019	0.0525993	PM54	CM55	142969	Sorbin and SH3 domain-containing protein 1 OS=Homo sapiens OX=9606 GN=SORBS1 PE=1 SV=3	275.273	248.961	265.495	249.361	307.275	248.095
B9ZVP7;C9JD32;J3KT29;P62829	4	3	30.2602	0.85825	0.184182	1.00931	0.0525777	PM54	CM55	12270.6	60S ribosomal protein L23 OS=Homo sapiens OX=9606 GN=RPL23 PE=1 SV=1	7499.79	8330.31	8492.58	8047.58	7795.18	8706.42
P50416;P50416-2;H3BMD2	8	1	40.8312	0.860943	0.184658	1.04306	0.0524792	CM55	PM54	89052.2	Carnitine O-palmitoyltransferase 1_ liver isoform OS=Homo sapiens OX=9606 GN=CPT1A PE=1 SV=2	130.02	298.017	104.391	185.99	148.069	176.39
REVERSE39796	2	1	8.7518	0.86349	0.185103	1.04628	0.0523878	PM54	CM55	57640.2	Reversed Sequence 39796	58.8588	37.9477	91.8129	40.2639	73.2871	83.7976
REVERSE18175	5	2	23.8883	0.868138	0.185998	1.01914	0.0522258	CM55	PM54	130756	Reversed Sequence 18175	442.941	512.925	396.294	415.951	490.228	420.588
REVERSE18213	3	2	12.5944	0.872863	0.186864	1.03505	0.0520671	CM55	PM54	77054.6	Reversed Sequence 18213	290.148	190.978	239.973	212.388	247.848	236.446
REVERSE22217	2	1	7.6756	0.873141	0.186864	1.02014	0.052058	CM55	PM54	71265.2	Reversed Sequence 22217	50.2557	142.638	142.358	131.762	81.0401	115.83
REVERSE39172	7	1	29.6853	0.874716	0.187099	1.87688	0.0520066	CM55	PM54	185246	Reversed Sequence 39172	15.5816	235.624	349.767	39.3582	114.664	166.176
Q14289;Q14289-2	5	1	16.1391	0.876459	0.187369	1.08804	0.0519505	CM55	PM54	117186	Protein-tyrosine kinase 2-beta OS=Homo sapiens OX=9606 GN=PTK2B PE=1 SV=2	458.058	191.935	305.848	220.024	273.755	384.72
Q14865;Q14865-2	4	1	16.6503	0.878314	0.187663	1.05966	0.0518916	PM54	CM55	133515	AT-rich interactive domain-containing protein 5B OS=Homo sapiens OX=9606 GN=ARID5B PE=1 SV=3	318.11	104.156	326.626	277.993	387.243	128.336
P23142;B1AHL2;P23142-2;P23142-3;P23142-4	3	1	11.9746	0.88114	0.188164	1.02119	0.0518038	PM54	CM55	81320.1	Fibulin-1 OS=Homo sapiens OX=9606 GN=FBLN1 PE=1 SV=4	151.828	156.317	79.7629	167.563	177.534	51.0289
P60953;P60953-1;Q5JYX0	5	3	36.2309	0.884391	0.188755	1.00679	0.0517054	PM54	CM55	21600.8	Cell division control protein 42 homolog OS=Homo sapiens OX=9606 GN=CDC42 PE=1 SV=2	918.111	1044.56	946.663	1026.49	929.82	972.785
Q27J81;Q27J81-2;A0A0A0MQU1;Q27J81-3	6	1	26.2235	0.885155	0.188815	1.0065	0.0516827	PM54	CM55	136936	Inverted formin-2 OS=Homo sapiens OX=9606 GN=INF2 PE=1 SV=2	64.7287	100.519	62.282	66.9234	76.4932	85.5922
P18077;C9K025;F8WB72;F8WBS5	2	1	14.901	0.885766	0.188842	1.06234	0.0516647	CM55	PM54	12594.7	60S ribosomal protein L35a OS=Homo sapiens OX=9606 GN=RPL35A PE=1 SV=2	65.5218	70.8305	208.3	134.18	76.2937	113.954
P41091;Q2VIR3;H7BZU1;Q2VIR3-2	8	4	48.9978	0.888529	0.189328	1.00831	0.0515844	CM55	PM54	51679.8	Eukaryotic translation initiation factor 2 subunit 3 OS=Homo sapiens OX=9606 GN=EIF2S3 PE=1 SV=3	1468.5	1344.39	1294.07	1362.03	1235.46	1475.63
REVERSE12754	4	2	14.7849	0.889034	0.189333	1.00829	0.0515699	PM54	CM55	149435	Reversed Sequence 12754	757.821	782.388	739.506	791.78	803.799	703.025
A0A0D9SFB1;A0A0D9SFE4;A0A0U1RQP1;Q05193;Q05193-2;Q05193-3;Q05193-5	1	1	2.8739	0.89057	0.189546	1.00948	0.0515263	CM55	PM54	94245.3	Dynamin-1 OS=Homo sapiens OX=9606 GN=DNM1 PE=1 SV=1	289.096	154.742	153.593	171.943	203.358	216.52
Q702N8;Q702N8-2	6	1	24.1964	0.891005	0.189546	1.01655	0.0515141	PM54	CM55	199759	Xin actin-binding repeat-containing protein 1 OS=Homo sapiens OX=9606 GN=XIRP1 PE=1 SV=1	193.617	152.228	238.937	235.443	169.129	189.886
P18124;A8MUD9	9	8	56.6538	0.891666	0.189583	1.00496	0.0514956	PM54	CM55	29282.9	60S ribosomal protein L7 OS=Homo sapiens OX=9606 GN=RPL7 PE=1 SV=1	4572.38	4822.42	5044.78	4709.73	4746.55	5054.91
REVERSE22818	8	1	32.8707	0.89222	0.189598	1.00589	0.0514802	PM54	CM55	82659.7	Reversed Sequence 22818	1779.17	1740.56	2038.82	1808.27	1946.85	1836.15
P78333	3	1	10.1097	0.892897	0.189638	1.04391	0.0514615	CM55	PM54	64847.6	Glypican-5 OS=Homo sapiens OX=9606 GN=GPC5 PE=2 SV=1	419.679	307.47	138.254	317.967	273.146	237.887
Q6NZI2;Q6NZI2-2;Q6NZI2-3	16	12	94.6391	0.895684	0.190127	1.00328	0.0513858	PM54	CM55	43476.2	Caveolae-associated protein 1 OS=Homo sapiens OX=9606 GN=CAVIN1 PE=1 SV=1	10451.6	10398	10357.9	10189.6	10863.7	10256.5
F6S8M0;H7C3P4;P15586;P15586-2;F5H4C6;H0YFA9	2	1	11.2503	0.905564	0.19212	1.00351	0.051134	PM54	CM55	66565.5	N-acetylglucosamine-6-sulfatase OS=Homo sapiens OX=9606 GN=GNS PE=1 SV=1	508.266	375.665	379.838	412.703	444.811	410.69
[truncated: 2,902 more rows]

## Sheet: ONLY ID BUT NO QUANT
TOTAL OF PROTEINS DETECTED BUT NOT QUANTIFIED (NOT UNIQUE PEPTIDES)										2868
[truncated: 2,868 more rows]

## Sheet: UNIQUE PROTEINS 
	EXCLUSIVE PROTEINS IN SYMPTOMATIC CARRIER-P1 Olfactory MSCs (PM54)							16	KIF5C, UTY, HIST1H1B, ANKRD36C, SCUBE2, CDK5RAP2, WDR62, MCPH1, ATP5PF, PIGN, KIAA0825 and 5 REVERSED SEQ
[truncated: 26 more rows]

[truncated: 3 more sheets: QUANTIFIED PROTEINS, WITHOUT REVERSES, FILTERED PROTEINS ]
