# Supplementary material for: The Proteome Profile of Olfactory Ecto-Mesenchymal Stem Cells-Derived from Patients with Familial Alzheimer’s Disease Reveals New Insights for AD Study
Source: Int J Mol Sci. 2023 Aug 9;24(16):12606. doi: 10.3390/ijms241612606 (PMC10454072; doi:10.3390/ijms241612606)
Supplement: Supplementary file 1 [file ijms-24-12606-s001.zip › Table S2. Diferentially expressed proteins (P1-C1).xlsx]

## Sheet:  DEPs P1-C1
SYMPTOMATIC CARRIER (P1) VS CONTROL (C1)
FILTERED PROTEINS						703
-UP-regulated proteins in symptomatic carrier vs control (FC>1.5)						118
-DOWN-regulated proteins in symptomatic carrier vs control (FC<0,6)						241
Diferentially expressed proteins						359
Accession	Peptide count	Unique peptides	Confidence score	Anova (p)	-LOG10.Anova(p)	q Value	Max fold change	Power	Highest mean condition	Lowest mean condition	Mass	GN	Description	CONTROL-CM55								PSEN1 (A431E) SYMPTOMATIC CARRIER-PM54								ratio.PM54/CM55 (Carrier/control)	LOG2 ratio.PM54/CM55 (Carrier/control)	EXPRESSION TAG (FC 1.5)
														20190314_UDMSE_CM55_001	20190314_UDMSE_CM55_002	20190314_UDMSE_CM55_003	average.intensity.control-CM55	log10(Average.intensity. control-CM55)	CV (Inten.Control-CM55)	count.control-CM55	IDs_control-CM55	20190314_UDMSE_PM54_001	20190314_UDMSE_PM54_002	20190314_UDMSE_PM54_003	average.intensity.carrier-PM54	log10(Average.intensity. carrier-PM54)	CV (Inten.carrier-PM54)	count_carrier-PM54	IDs_carrier-PM54
P68871;A0A2R8Y7R2;F8W6P5	15	11	48.6836	1.99406e-06	5.70026	4.32922e-05	189.485	1	CM55	PM54	16112.5	HBB	Hemoglobin subunit beta OS=Homo sapiens OX=9606 GN=HBB PE=1 SV=2	6590.72	6512.12	6093.54	6398.8	3.8061	0.0417675	3	147	41.5087	27.0273	32.7724	33.7695	1.52852	0.215934	3	1799	0.00527748	-7.56594	DOWN
Q9HCM1;J3KPI3	9	1	40.1266	1.04921e-05	4.97914	9.31866e-05	52.0463	1	CM55	PM54	196682	KIAA1551	Uncharacterized protein KIAA1551 OS=Homo sapiens OX=9606 GN=KIAA1551 PE=1 SV=3	670.269	615.712	602.942	629.641	2.79909	0.056793	3	883	12.7185	14.5372	9.03739	12.0977	1.0827	0.231611	3	1828	0.0192136	-5.70172	DOWN
P20591;F8W8T1;P20591-2;H9KVC7;H9KVC9;P20592-2;C9JEL4;H9KVC4;H9KVD0;C9JS04;C9JZQ9	19	11	140.755	4.18603e-06	5.3782	5.84235e-05	37.1341	1	CM55	PM54	75919.6	MX1	Interferon-induced GTP-binding protein Mx1 OS=Homo sapiens OX=9606 GN=MX1 PE=1 SV=4	4023.47	4392.81	4591	4335.76	3.63706	0.0664317	3	194	115.856	97.6224	136.8	116.76	2.06729	0.167904	3	1593	0.0269294	-5.21467	DOWN
A0A2R8Y7C0;P69905;G3V1N2	3	3	19.1436	3.04135e-06	5.51693	4.75411e-05	27.5877	1	CM55	PM54	13842.7	HBA2	Hemoglobin subunit alpha (Fragment) OS=Homo sapiens OX=9606 GN=HBA2 PE=1 SV=1	1679.2	1460.65	1519.95	1553.27	3.19125	0.0727614	3	497	61.9547	58.9932	47.9608	56.3029	1.75053	0.130982	3	1746	0.036248	-4.78596	DOWN
E7EMF1;E7ESP4;E9PB77	13	1	90.1703	7.13228e-05	4.14677	0.000200036	26.8945	1	CM55	PM54	89474.7	ITGA2	Integrin alpha-2 OS=Homo sapiens OX=9606 GN=ITGA2 PE=1 SV=1	829.329	991.712	951.259	924.1	2.96572	0.0914725	3	708	43.2016	23.0367	36.8421	34.3602	1.53606	0.300029	3	1797	0.0371823	-4.74924	DOWN
Q86YA3;G3XAL8;Q86YA3-4;Q86YA3-5;Q86YA3-6;I3L0G6;Q86YA3-3;Q86YA3-7;Q86YA3-2	21	2	108.275	0.01422	1.8471	0.00695497	29.682	0.86746	CM55	PM54	239054	ZGRF1	Protein ZGRF1 OS=Homo sapiens OX=9606 GN=ZGRF1 PE=1 SV=3	129.013	187.611	172.845	163.156	2.2126	0.186792	3	1480	9.79597		6.69447	8.24522	0.916202	0.265983	2	1839	0.0505356	-4.30655	DOWN
Q8TEP8;A0A0A0MR42;H0Y966;K7ENP4;Q8TEP8-1;K7ELX0;Q8TEP8-2;H0Y9P3;K7ERF9	17	2	76.5002	3.71987e-05	4.42947	0.000145369	19.1761	1	CM55	PM54	281792	CEP192	Centrosomal protein of 192 kDa OS=Homo sapiens OX=9606 GN=CEP192 PE=1 SV=3	1175.92	1142.56	913.824	1077.44	3.03239	0.132417	3	636	68.2639	44.2548	56.0407	56.1865	1.74963	0.213668	3	1747	0.0521483	-4.26124	DOWN
Q15283	3	1	12.3231	5.98944e-05	4.22261	0.000185763	14.264	1	CM55	PM54	97982.9	RASA2	Ras GTPase-activating protein 2 OS=Homo sapiens OX=9606 GN=RASA2 PE=1 SV=3	1338.73	1349.72	1351.09	1346.52	3.12921	0.0050314	3	550	120.312	71.2039	91.6822	94.3993	1.97497	0.261298	3	1653	0.0701064	-3.83431	DOWN
Q9Y6K5;F8VS35;F8VWK9	4	3	21.6171	2.02238e-05	4.69414	0.000111313	13.5268	1	CM55	PM54	122938	OAS3	2'-5'-oligoadenylate synthase 3 OS=Homo sapiens OX=9606 GN=OAS3 PE=1 SV=3	302.034	401.897	386.505	363.479	2.56048	0.147922	3	1127	30.5797	24.7945	25.2389	26.871	1.42928	0.119812	3	1812	0.0739274	-3.75775	DOWN
O14879	5	3	30.1867	3.5614e-06	5.44838	5.35291e-05	11.1623	1	CM55	PM54	56726.2	IFIT3	Interferon-induced protein with tetratricopeptide repeats 3 OS=Homo sapiens OX=9606 GN=IFIT3 PE=1 SV=1	3158.33	3009.8	2873.32	3013.81	3.47912	0.0472966	3	272	298.444	241.354	270.203	270	2.43136	0.105723	3	1244	0.0895875	-3.48056	DOWN
F2Z2E2;Q86VI3	11	2	50.0734	0.000107776	3.96748	0.000240673	10.124	1	CM55	PM54	180112	IQGAP3	Ras GTPase-activating-like protein IQGAP3 OS=Homo sapiens OX=9606 GN=IQGAP3 PE=1 SV=1	341.31	253.452	298.838	297.867	2.47402	0.147506	3	1223	30.3435	35.0661	22.8557	29.4217	1.46867	0.209272	3	1806	0.0987749	-3.33971	DOWN
P35968;P35968-2;P35968-3	7	1	38.0812	4.14708e-05	4.38226	0.000151461	9.74547	1	CM55	PM54	153409	KDR	Vascular endothelial growth factor receptor 2 OS=Homo sapiens OX=9606 GN=KDR PE=1 SV=2	457.814	337.597	358.064	384.492	2.58489	0.167282	3	1105	40.1991	34.3845	43.7764	39.4534	1.59608	0.120146	3	1787	0.102612	-3.28473	DOWN
O75923;O75923-10;O75923-11;O75923-12;O75923-13;O75923-14;O75923-2;O75923-3;O75923-4;O75923-5;O75923-6;O75923-7;O75923-8;O75923-9;O75923-15	15	2	78.9448	1.44533e-05	4.84003	0.000106692	9.06898	1	CM55	PM54	239405	DYSF	Dysferlin OS=Homo sapiens OX=9606 GN=DYSF PE=1 SV=1	522.67	453.931	515.797	497.466	2.69676	0.0761027	3	995	58.1161	59.4386	47.006	54.8536	1.7392	0.124483	3	1751	0.110266	-3.18094	DOWN
P26447	9	5	35.7362	2.42296e-08	7.61565	3.15623e-06	7.00416	1	CM55	PM54	11956.7	S100A4	Protein S100-A4 OS=Homo sapiens OX=9606 GN=S100A4 PE=1 SV=1	6706.47	6750	6542.9	6666.46	3.8239	0.0163792	3	135	945.724	935.183	974.449	951.785	2.97854	0.0213521	3	638	0.142772	-2.80821	DOWN
P15121;E9PCX2;E9PEF9;Q5T621;V9GYG2;V9GYP9	8	5	53.0456	1.52017e-06	5.81811	3.71292e-05	6.27027	1	CM55	PM54	36252.6	AKR1B1	Aldose reductase OS=Homo sapiens OX=9606 GN=AKR1B1 PE=1 SV=3	1798.21	1624.34	1733.32	1718.62	3.23518	0.0511233	3	453	261.333	288.4	272.538	274.09	2.43789	0.0496204	3	1238	0.159483	-2.64853	DOWN
P28838;P28838-2;H0Y9Q1;H0Y983	13	3	82.108	4.41797e-06	5.35478	5.87092e-05	5.7965	1	CM55	PM54	56565.6	LAP3	Cytosol aminopeptidase OS=Homo sapiens OX=9606 GN=LAP3 PE=1 SV=3	879.603	850.961	793.52	841.361	2.92498	0.0521021	3	750	134.548	145.473	155.429	145.15	2.16182	0.0719548	3	1523	0.172518	-2.53518	DOWN
P17661	12	1	127.007	0.000473975	3.32424	0.00066516	5.75362	1	CM55	PM54	53592.9	DES	Desmin OS=Homo sapiens OX=9606 GN=DES PE=1 SV=3	279.897	223.588	182.199	228.562	2.359	0.214553	3	1333	39.0123	32.3915	47.7708	39.7249	1.59906	0.194195	3	1786	0.173804	-2.52447	DOWN
Q5SZK8;Q5SZK8-2	21	2	86.7743	2.81467e-06	5.55057	4.58311e-05	5.48383	1	CM55	PM54	352811	FREM2	FRAS1-related extracellular matrix protein 2 OS=Homo sapiens OX=9606 GN=FREM2 PE=1 SV=2	2930.01	3085.66	2829.5	2948.39	3.46958	0.0437752	3	276	509.233	576.316	527.406	537.652	2.7305	0.0645313	3	906	0.182354	-2.45518	DOWN
Q96RT1;Q96RT1-2;Q96RT1-3;Q96RT1-4;Q96RT1-5;Q96RT1-7;Q96RT1-8;Q96RT1-9;Q96RT1-6;B4DIP2;H0YA04	6	1	27.8331	0.000506407	3.2955	0.000687148	5.47891	1	CM55	PM54	159040	ERBIN	Erbin OS=Homo sapiens OX=9606 GN=ERBIN PE=1 SV=2	597.629	490.838	474.969	521.145	2.71696	0.128008	3	971	97.8608	117.408	70.0865	95.1185	1.97827	0.250001	3	1651	0.182518	-2.45389	DOWN
Q0VDD8	26	1	120.894	0.000603433	3.21937	0.000731632	5.35331	0.999999	CM55	PM54	404172	DNAH14	Dynein heavy chain 14_ axonemal OS=Homo sapiens OX=9606 GN=DNAH14 PE=2 SV=3	435.224	395.407	495.705	442.112	2.64553	0.11423	3	1046	83.6267	104.115	60.0181	82.5865	1.91691	0.267195	3	1687	0.1868	-2.42043	DOWN
Q12841;Q12841-2	2	1	9.0843	0.000154026	3.81241	0.000300563	5.30407	1	CM55	PM54	36126.1	FSTL1	Follistatin-related protein 1 OS=Homo sapiens OX=9606 GN=FSTL1 PE=1 SV=1	618.018	425.092	577.336	540.149	2.73251	0.188276	3	961	95.9869	103.467	106.056	101.837	2.0079	0.0513456	3	1640	0.188534	-2.4071	DOWN
A0A087X0D8;Q5JTN6;A0A087X0J1	2	1	7.101	0.000988526	3.00501	0.000998206	4.51694	0.999977	CM55	PM54	35067.5	WDR38	WD repeat-containing protein 38 OS=Homo sapiens OX=9606 GN=WDR38 PE=4 SV=1	255.466	156.542	196.233	202.747	2.30695	0.245541	3	1387	36.7512	51.6399	46.2664	44.8859	1.65211	0.167976	3	1775	0.221389	-2.17535	DOWN
Q5TCZ1;H0Y507;Q5TCZ1-2;Q5TCZ1-3	6	1	33.3429	0.000145724	3.83647	0.000289074	4.16095	1	CM55	PM54	125974	SH3PXD2A	SH3 and PX domain-containing protein 2A OS=Homo sapiens OX=9606 GN=SH3PXD2A PE=1 SV=1	651.874	644.728	529.063	608.555	2.7843	0.113276	3	902	127.595	145.814	165.353	146.254	2.16511	0.12911	3	1518	0.24033	-2.05691	DOWN
P02768;A0A087WWT3;A0A0C4DGB6;B7WNR0;C9JKR2;D6RHD5;H0YA55;P02768-2;P02768-3	10	5	49.7877	6.71262e-06	5.17311	7.27912e-05	3.93192	1	CM55	PM54	71362.7	ALB	Serum albumin OS=Homo sapiens OX=9606 GN=ALB PE=1 SV=2	3424.51	3710.63	3514.9	3550.01	3.55023	0.0411992	3	234	952.359	838.395	917.856	902.87	2.95563	0.0647283	3	668	0.254329	-1.97523	DOWN
Q9Y4B5;Q9Y4B5-2;Q9Y4B5-3	6	2	28.7671	0.000383755	3.41595	0.000574589	3.88373	1	CM55	PM54	210781	MTCL1	Microtubule cross-linking factor 1 OS=Homo sapiens OX=9606 GN=MTCL1 PE=1 SV=5	976.919	1173.63	847.673	999.407	2.99974	0.164235	3	669	219.263	284.073	268.658	257.331	2.41049	0.13157	3	1271	0.257484	-1.95744	DOWN
Q8N5V2;Q8N5V2-3	3	1	11.6401	0.00118318	2.92695	0.00111955	3.64995	0.999934	CM55	PM54	83180.9	NGEF	Ephexin-1 OS=Homo sapiens OX=9606 GN=NGEF PE=1 SV=2	583.518	867.778	817.102	756.133	2.8786	0.200522	3	789	243.375	174.504	203.609	207.163	2.31631	0.166887	3	1381	0.273977	-1.86788	DOWN
Q96G03;Q96G03-2;E7ENQ8;E9PD70	5	1	28.3872	9.48217e-05	4.02309	0.000228376	3.53133	1	CM55	PM54	68796.7	PGM2	Phosphoglucomutase-2 OS=Homo sapiens OX=9606 GN=PGM2 PE=1 SV=4	727.433	689.331	668.305	695.023	2.842	0.0431239	3	836	196.877	222.69	170.883	196.816	2.29406	0.131613	3	1408	0.28318	-1.82021	DOWN
P13747;Q6DU44;A0A140T9Z7;A0A140TA12;F8W9Z8	8	3	35.9421	6.8651e-05	4.16335	0.000199973	3.5215	1	CM55	PM54	40384.9	HLA-E	HLA class I histocompatibility antigen_ alpha chain E OS=Homo sapiens OX=9606 GN=HLA-E PE=1 SV=3	728.005	616.288	773.493	705.929	2.84876	0.114592	3	826	194.448	195.168	211.772	200.463	2.30203	0.0488905	3	1396	0.28397	-1.81619	DOWN
Q9H792;H0YN99;H3BUZ5	11	1	44.265	0.000537983	3.26923	0.000705497	3.38458	1	CM55	PM54	195160	PEAK1	Inactive tyrosine-protein kinase PEAK1 OS=Homo sapiens OX=9606 GN=PEAK1 PE=1 SV=4	609.146	508.549	614.445	577.38	2.76146	0.103343	3	929	204.705	164.031	143.038	170.591	2.23196	0.183789	3	1456	0.295458	-1.75898	DOWN
P35555	6	3	22.1175	0.000164976	3.78258	0.000316034	3.36967	1	CM55	PM54	332882	FBN1	Fibrillin-1 OS=Homo sapiens OX=9606 GN=FBN1 PE=1 SV=3	1460.4	1526.84	1426.73	1471.32	3.16771	0.0346217	3	519	447.855	367.693	494.367	436.638	2.64012	0.146753	3	1024	0.296765	-1.75261	DOWN
Q9UK10;K7ENA2;K7ENC8;K7ERU6;C9K038;Q96K75	3	1	15.599	0.00213548	2.6705	0.00167575	3.31558	0.99887	CM55	PM54	84980.8	ZNF225	Zinc finger protein 225 OS=Homo sapiens OX=9606 GN=ZNF225 PE=1 SV=2	118.615	113.445	134.143	122.068	2.0866	0.088251	3	1557	42.5185	25.7413	42.1892	36.8164	1.56604	0.260554	3	1793	0.301606	-1.72926	DOWN
Q96HH9;B7Z4W8;D6REP5;E9PD09;Q96HH9-2;Q96HH9-3;Q96HH9-4;Q96HH9-5	2	1	10.6097	0.000221994	3.65366	0.000389026	3.31076	1	CM55	PM54	48325.5	GRAMD2B	GRAM domain-containing protein 2B OS=Homo sapiens OX=9606 GN=GRAMD2B PE=1 SV=1	912.995	837.401	1025.76	925.386	2.96632	0.102433	3	706	311.47	241.967	285.09	279.509	2.4464	0.125526	3	1230	0.302046	-1.72716	DOWN
P02751;P02751-15;P02751-17;P02751-3;P02751-7;P02751-10;P02751-11;P02751-13;P02751-14;P02751-6;P02751-8;P02751-9;P02751-5;P02751-12;P02751-4;H0Y7Z1;P02751-16;P02751-2;H0Y4K8	58	39	380.989	1.1978e-06	5.92161	3.168e-05	3.29398	1	CM55	PM54	266218	FN1	Fibronectin OS=Homo sapiens OX=9606 GN=FN1 PE=1 SV=4	14178.6	14101.9	13645.1	13975.2	4.14536	0.0206395	3	59	4217.56	4417.48	4092.92	4242.66	3.62764	0.038591	3	172	0.303585	-1.71983	DOWN
P17813;P17813-2;F5GX88	6	2	35.7466	0.00180115	2.74445	0.00147562	3.23628	0.999455	CM55	PM54	71604.7	ENG	Endoglin OS=Homo sapiens OX=9606 GN=ENG PE=1 SV=2	609.422	730.196	693.255	677.625	2.83099	0.0913271	3	849	242.061	235.083	151.007	209.384	2.32094	0.242025	3	1380	0.308997	-1.69434	DOWN
P42224;P42224-2;J3KPM9;D2KFR9;E7EPD2;E7ENM1;E9PH66;H7BZB5;H7BZ88	33	23	220.074	1.04302e-07	6.98171	8.0264e-06	3.22052	1	CM55	PM54	87905.2	STAT1	Signal transducer and activator of transcription 1-alpha/beta OS=Homo sapiens OX=9606 GN=STAT1 PE=1 SV=2	12712.4	13199.6	13079.1	12997	4.11384	0.0195248	3	67	4088.79	3988.13	4030.15	4035.69	3.60592	0.0125275	3	182	0.310509	-1.68729	DOWN
A0A0R4J2E8;A8MXP9;P43243;D6REM6;B3KM87;P43243-2;D6R991;Q68E03;H0Y8T4	9	3	49.2745	0.00214776	2.66801	0.00167865	3.11223	0.998843	CM55	PM54	95136.6	MATR3	Matrin-3 OS=Homo sapiens OX=9606 GN=MATR3 PE=1 SV=1	378.345	277.351	251.308	302.334	2.48049	0.221949	3	1218	117.032	91.7189	82.681	97.1438	1.98742	0.183298	3	1649	0.321313	-1.63795	DOWN
O94986;O94986-1;O94986-2;O94986-3	4	1	20.7921	0.000139867	3.85428	0.000287677	3.03858	1	CM55	PM54	198022	CEP152	Centrosomal protein of 152 kDa OS=Homo sapiens OX=9606 GN=CEP152 PE=1 SV=4	790.229	981.434	770.206	847.29	2.92803	0.137619	3	747	277.083	284.007	275.442	278.844	2.44536	0.0163026	3	1231	0.329101	-1.6034	DOWN
P31946;P31946-2;A0A0J9YWE8;Q4VY19;Q4VY20;A0A0J9YWZ2	14	7	118.334	2.30815e-06	5.63674	4.54993e-05	2.99081	1	CM55	PM54	28196.5	YWHAB	14-3-3 protein beta/alpha OS=Homo sapiens OX=9606 GN=YWHAB PE=1 SV=3	4088.46	4029.08	4377.1	4164.88	3.6196	0.0447	3	204	1419.58	1377.97	1380.13	1392.56	3.14381	0.0168223	3	477	0.334357	-1.58054	DOWN
E7ESJ3;Q9UPS8	3	1	12.7096	0.00151903	2.81843	0.00133099	2.95762	0.999755	CM55	PM54	199528	ANKRD26	Ankyrin repeat domain-containing protein 26 OS=Homo sapiens OX=9606 GN=ANKRD26 PE=1 SV=1	2814.65	2650.03	2537.46	2667.38	3.42608	0.0522644	3	302	959.236	674.445	1071.92	901.867	2.95514	0.227144	3	669	0.33811	-1.56444	DOWN
O95359;E7EMZ9;E9PBC6;O95359-3;O95359-5;D6RAA5;O95359-1;O95359-6;Q4VXL8;E9PGB3;O95359-2;Q4VXL4;H0Y911;H0Y9C3	8	1	44.0026	0.00131368	2.88151	0.00121365	2.95554	0.999884	CM55	PM54	311823	TACC2	Transforming acidic coiled-coil-containing protein 2 OS=Homo sapiens OX=9606 GN=TACC2 PE=1 SV=3	323.503	429.9	298.127	350.51	2.5447	0.199465	3	1141	133.422	102.752	119.609	118.594	2.07406	0.129517	3	1589	0.338348	-1.56342	DOWN
Q9Y6U3;Q9Y6U3-2;Q9Y6U3-3;C9JGB6;F8WBX5	6	1	28.8336	0.000293106	3.53298	0.000467521	2.89262	1	CM55	PM54	80945.2	SCIN	Adseverin OS=Homo sapiens OX=9606 GN=SCIN PE=1 SV=4	775.223	774.04	768.197	772.487	2.88789	0.00486941	3	783	236.261	316.658	248.246	267.055	2.4266	0.162415	3	1252	0.345708	-1.53237	DOWN
P17301;D6RG08	16	1	104.553	0.00296775	2.52757	0.00211216	2.86963	0.996136	CM55	PM54	130550	ITGA2	Integrin alpha-2 OS=Homo sapiens OX=9606 GN=ITGA2 PE=1 SV=1	254.157	368.807	346.241	323.068	2.50929	0.187998	3	1187	137.665	107.698	92.3825	112.582	2.05147	0.204589	3	1603	0.348477	-1.52087	DOWN
O00567;H0Y653;H0YDU4;Q5JXT2	8	1	39.2739	0.00071095	3.14816	0.000818033	2.7688	0.999998	CM55	PM54	66449.2	NOP56	Nucleolar protein 56 OS=Homo sapiens OX=9606 GN=NOP56 PE=1 SV=4	713.048	645.844	679.897	679.596	2.83225	0.0494455	3	848	273.102	266.501	196.741	245.448	2.38996	0.172382	3	1296	0.361167	-1.46926	DOWN
P27797;K7EJB9;K7EL50	23	20	162.87	7.4066e-07	6.13038	2.44711e-05	2.73801	1	CM55	PM54	48312.7	CALR	Calreticulin OS=Homo sapiens OX=9606 GN=CALR PE=1 SV=1	37907.9	38209.6	39748.9	38622.2	4.58684	0.0255659	3	13	13806	14125.7	14386	14105.9	4.1494	0.0205942	3	45	0.365228	-1.45313	DOWN
Q9UL46;A0A087X1Z3;H0YM70;H0YKU2	4	2	22.2391	0.000453416	3.3435	0.000644328	2.7106	1	CM55	PM54	27572.8	PSME2	Proteasome activator complex subunit 2 OS=Homo sapiens OX=9606 GN=PSME2 PE=1 SV=4	943.347	760.331	703.586	802.421	2.9044	0.156152	3	773	279.307	295.714	313.071	296.03	2.47134	0.057034	3	1195	0.368921	-1.43861	DOWN
A0A087WTA8;P08123	15	11	98.8937	5.78967e-07	6.23735	2.26254e-05	2.67792	1	CM55	PM54	129664	COL1A2	Collagen alpha-2(I) chain OS=Homo sapiens OX=9606 GN=COL1A2 PE=1 SV=1	3001.97	2866.27	2970.67	2946.3	3.46928	0.0241166	3	277	1078.15	1115.1	1107.41	1100.22	3.04148	0.0177211	3	577	0.373424	-1.42111	DOWN
Q9NZR2	33	4	123.098	0.00180943	2.74246	0.0014793	2.67119	0.999444	CM55	PM54	535173	LRP1B	Low-density lipoprotein receptor-related protein 1B OS=Homo sapiens OX=9606 GN=LRP1B PE=1 SV=2	290.826	377.481	344.465	337.591	2.52839	0.12955	3	1159	104.715	153.036	121.395	126.382	2.10169	0.1942	3	1575	0.374365	-1.41748	DOWN
P16152;A8MTM1;E9PQ63;P16152-2	7	5	39.368	2.32208e-05	4.63412	0.00011491	2.64155	1	CM55	PM54	30660.1	CBR1	Carbonyl reductase [NADPH] 1 OS=Homo sapiens OX=9606 GN=CBR1 PE=1 SV=3	1378.46	1424	1509.65	1437.37	3.15757	0.0463388	3	529	508.929	552.911	570.574	544.138	2.73571	0.0583398	3	896	0.378566	-1.40138	DOWN
C9JZR2;O60716;O60716-10;O60716-11;O60716-12;O60716-13;O60716-14;O60716-15;O60716-16;O60716-17;O60716-18;O60716-19;O60716-2;O60716-20;O60716-21;O60716-22;O60716-23;O60716-24;O60716-25;O60716-26;O60716-27;O60716-28;O60716-29;O60716-3;O60716-30;O60716-31;O60716-32;O60716-4;O60716-5;O60716-6;O60716-7;O60716-8;O60716-9	5	1	24.2481	0.00760776	2.11874	0.00425327	2.63228	0.953407	CM55	PM54	105419	CTNND1	Catenin delta-1 OS=Homo sapiens OX=9606 GN=CTNND1 PE=1 SV=2	368.092	427.617	321.359	372.356	2.57096	0.143027	3	1118	167.727	161.126	95.5205	141.458	2.15063	0.2822	3	1533	0.379899	-1.39631	DOWN
Q14643;Q14643-2;Q14643-3;Q14643-4;Q14643-5;Q14643-6;Q14643-7;Q14643-8;B7ZMI3	17	3	73.5986	8.77338e-05	4.05683	0.000224088	2.61833	1	CM55	PM54	317351	ITPR1	Inositol 1_4_5-trisphosphate receptor type 1 OS=Homo sapiens OX=9606 GN=ITPR1 PE=1 SV=3	539.544	635.93	537.387	570.954	2.7566	0.0985742	3	933	226.961	216.962	210.258	218.06	2.33858	0.0385471	3	1360	0.381922	-1.38865	DOWN
P07951-2;A7XZE4	26	2	255.573	0.000318334	3.49712	0.000495624	2.59934	1	CM55	PM54	33046.9	TPM2	Isoform 2 of Tropomyosin beta chain OS=Homo sapiens OX=9606 GN=TPM2	944.031	753.607	797.378	831.672	2.91995	0.119923	3	755	306.29	350.545	303.029	319.955	2.50509	0.0829565	3	1163	0.384713	-1.37815	DOWN
Q5VV63;E9PL90;Q5VV63-2;R4GMZ1	2	1	8.9105	0.00159975	2.79595	0.00137701	2.5961	0.999685	CM55	PM54	157544	ATRNL1	Attractin-like protein 1 OS=Homo sapiens OX=9606 GN=ATRNL1 PE=2 SV=2	435.107	549.996	646.192	543.765	2.73541	0.19435	3	956	229.424	199.14	199.801	209.455	2.32109	0.082581	3	1379	0.385194	-1.37634	DOWN
Q9Y238-3;Q9Y238	4	1	20.0537	0.00421461	2.37524	0.00274047	2.57257	0.988561	CM55	PM54	200293	DLEC1	Isoform 3 of Deleted in lung and esophageal cancer protein 1 OS=Homo sapiens OX=9606 GN=DLEC1	352.229	307.646	369.272	343.049	2.53536	0.0927624	3	1150	135.085	97.9305	167.031	133.349	2.12499	0.259342	3	1556	0.388716	-1.36321	DOWN
P30040;F8VY02;P30040-2	4	1	26.1556	0.00261977	2.58174	0.00195006	2.55042	0.997511	CM55	PM54	29050.5	ERP29	Endoplasmic reticulum resident protein 29 OS=Homo sapiens OX=9606 GN=ERP29 PE=1 SV=4	728.309	597.731	622.765	649.602	2.81265	0.106685	3	866	323.846	223.195	217.071	254.704	2.40604	0.235397	3	1279	0.392093	-1.35073	DOWN
Q9P2D1;Q9P2D1-2;Q9P2D1-3	14	1	61.8313	0.00176183	2.75404	0.00144948	2.54165	0.999507	CM55	PM54	337753	CHD7	Chromodomain-helicase-DNA-binding protein 7 OS=Homo sapiens OX=9606 GN=CHD7 PE=1 SV=3	1275.1	1397.38	962.223	1211.57	3.08335	0.185237	3	591	450.208	529.273	450.575	476.685	2.67823	0.0955403	3	969	0.393445	-1.34576	DOWN
O43765;K7EMD6	3	1	20.1035	7.20302e-05	4.14249	0.000200036	2.52851	1	CM55	PM54	34291.3	SGTA	Small glutamine-rich tetratricopeptide repeat-containing protein alpha OS=Homo sapiens OX=9606 GN=SGTA PE=1 SV=1	1844.22	1693.72	1919.44	1819.13	3.25986	0.0631808	3	432	662.694	755.583	740.057	719.445	2.857	0.0691602	3	759	0.395489	-1.33829	DOWN
P42356;C9JLI1;P42356-2	6	1	25.3703	0.00998434	2.00068	0.00526556	2.51268	0.923023	CM55	PM54	239397	PI4KA	Phosphatidylinositol 4-kinase alpha OS=Homo sapiens OX=9606 GN=PI4KA PE=1 SV=4	184.289	206.916	307.573	232.926	2.36722	0.281758	3	1323	106.884	71.7344	99.4822	92.7003	1.96708	0.199895	3	1659	0.397982	-1.32923	DOWN
Q6V0I7;Q6V0I7-3	9	1	42.7602	0.00226153	2.6456	0.00174316	2.48657	0.998577	CM55	PM54	546622	FAT4	Protocadherin Fat 4 OS=Homo sapiens OX=9606 GN=FAT4 PE=1 SV=2	569.963	583.718	623.418	592.367	2.77259	0.046858	3	915	296.587	188.744	229.347	238.226	2.37699	0.228635	3	1315	0.40216	-1.31416	DOWN
P49454;A0A087WTY4	15	2	71.3832	8.27723e-05	4.08211	0.000217091	2.47722	1	CM55	PM54	371073	CENPF	Centromere protein F OS=Homo sapiens OX=9606 GN=CENPF PE=1 SV=2	332.267	361.021	361.684	351.657	2.54612	0.0477608	3	1140	134.855	135.062	155.952	141.956	2.15216	0.085387	3	1530	0.403678	-1.30872	DOWN
O00443;A0A0C4DGF9;O00443-2;E9PPP3	5	2	22.84	0.000998241	3.00076	0.000999541	2.47448	0.999976	CM55	PM54	192277	PIK3C2A	Phosphatidylinositol 4-phosphate 3-kinase C2 domain-containing subunit alpha OS=Homo sapiens OX=9606 GN=PIK3C2A PE=1 SV=2	726.953	831.344	859.72	806.005	2.90634	0.0867442	3	771	289.425	299.554	388.202	325.727	2.51285	0.166832	3	1154	0.404125	-1.30713	DOWN
Q70CQ4;I3L4X5;Q70CQ4-2	5	1	26.5605	0.00419687	2.37707	0.00273349	2.41245	0.988696	CM55	PM54	148420	USP31	Ubiquitin carboxyl-terminal hydrolase 31 OS=Homo sapiens OX=9606 GN=USP31 PE=2 SV=2	546.38	491.624	414.523	484.176	2.685	0.136816	3	1007	254.072	166.85	181.173	200.698	2.30254	0.233059	3	1394	0.414516	-1.2705	DOWN
P13994;K7ELI4	2	1	9.1529	0.000816113	3.08825	0.000883782	2.40219	0.999993	CM55	PM54	45258.6	CCDC130	Coiled-coil domain-containing protein 130 OS=Homo sapiens OX=9606 GN=CCDC130 PE=1 SV=2	205.485	183.105	209.882	199.491	2.29992	0.0719803	3	1394	95.2616	83.4518	70.4229	83.0454	1.91932	0.149609	3	1683	0.416287	-1.26435	DOWN
Q9UNH7;A0A0A0MRI2;Q9UNH7-2	3	1	14.6352	0.00394056	2.40444	0.00260563	2.38324	0.990558	CM55	PM54	46934	SNX6	Sorting nexin-6 OS=Homo sapiens OX=9606 GN=SNX6 PE=1 SV=1	566.271	547.089	514.878	542.746	2.7346	0.04785	3	957	203.361	296.598	183.243	227.734	2.35743	0.265574	3	1337	0.419597	-1.25293	DOWN
Q12965	2	1	9.0938	0.000971961	3.01235	0.000996213	2.36	0.99998	CM55	PM54	127632	MYO1E	Unconventional myosin-Ie OS=Homo sapiens OX=9606 GN=MYO1E PE=1 SV=2	566.622	538.243	544.17	549.678	2.74011	0.0272338	3	949	252.861	256.498	189.386	232.915	2.3672	0.162039	3	1326	0.42373	-1.23878	DOWN
F8WBW8;Q9P281	5	2	26.2373	4.09759e-05	4.38747	0.000151461	2.35923	1	CM55	PM54	279699	BAHCC1	BAH and coiled-coil domain-containing protein 1 OS=Homo sapiens OX=9606 GN=BAHCC1 PE=1 SV=2	1577.53	1620.32	1458.52	1552.12	3.19093	0.0540187	3	499	694.908	653.838	624.936	657.894	2.81816	0.0534456	3	799	0.423867	-1.23832	DOWN
P78367	3	1	14.1717	0.00676759	2.16957	0.00392301	2.33926	0.963415	CM55	PM54	35213.1	NKX3-2	Homeobox protein Nkx-3.2 OS=Homo sapiens OX=9606 GN=NKX3-2 PE=2 SV=2	145.121	104.738	126.151	125.337	2.09808	0.161197	3	1548	47.1814	69.0928	44.4646	53.5796	1.729	0.252024	3	1756	0.427485	-1.22605	DOWN
O60346;O60346-2	2	1	8.0571	0.00345268	2.46184	0.002354	2.33237	0.993664	CM55	PM54	187068	PHLPP1	PH domain leucine-rich repeat-containing protein phosphatase 1 OS=Homo sapiens OX=9606 GN=PHLPP1 PE=1 SV=3	1036.37	948.215	695.286	893.291	2.95099	0.198202	3	727	421.734	384.428	342.828	382.997	2.5832	0.103063	3	1085	0.428748	-1.2218	DOWN
Q9C0G6;Q9C0G6-4;Q9C0G6-2;Q9C0G6-3	46	3	202.941	0.0018985	2.72159	0.00152657	2.3123	0.999312	CM55	PM54	479975	DNAH6	Dynein heavy chain 6_ axonemal OS=Homo sapiens OX=9606 GN=DNAH6 PE=2 SV=3	160.822	201.324	218.518	193.555	2.2868	0.153043	3	1409	72.5684	89.5755	88.9753	83.7064	1.92276	0.115289	3	1681	0.432469	-1.20933	DOWN
Q7Z333;Q7Z333-3;Q7Z333-4	14	1	56.4027	0.00274747	2.56107	0.00200274	2.31164	0.997046	CM55	PM54	307214	SETX	Probable helicase senataxin OS=Homo sapiens OX=9606 GN=SETX PE=1 SV=4	453.495	532.876	520.413	502.261	2.70093	0.084996	3	988	219.297	172.624	259.902	217.275	2.33701	0.201008	3	1362	0.432593	-1.20892	DOWN
Q8IY21;H0Y9B2	7	3	28.3713	0.00022505	3.64772	0.000392622	2.30523	1	CM55	PM54	199849	DDX60	Probable ATP-dependent RNA helicase DDX60 OS=Homo sapiens OX=9606 GN=DDX60 PE=1 SV=3	325.354	315.914	328.342	323.203	2.50948	0.0200712	3	1186	144.077	153.393	123.143	140.205	2.14676	0.110498	3	1540	0.433797	-1.20491	DOWN
Q9UBZ9;Q9UBZ9-2;Q9UBZ9-3	2	1	12.9618	0.0033747	2.47177	0.00231368	2.26809	0.994104	CM55	PM54	139446	REV1	DNA repair protein REV1 OS=Homo sapiens OX=9606 GN=REV1 PE=1 SV=1	191.674	154.102	180.007	175.261	2.24369	0.109725	3	1453	96.0146	69.2007	66.6023	77.2725	1.88803	0.210722	3	1703	0.4409	-1.18148	DOWN
Q2M3C7;Q2M3C7-2	4	2	15.991	0.00187252	2.72757	0.00151325	2.23838	0.999352	CM55	PM54	189194	SPHKAP	A-kinase anchor protein SPHKAP OS=Homo sapiens OX=9606 GN=SPHKAP PE=1 SV=1	1568.65	1206.74	1118.76	1298.05	3.11329	0.18369	3	563	622.732	549.023	567.959	579.905	2.76336	0.0660087	3	864	0.446751	-1.16246	DOWN
P52209;P52209-2;K7EM49;K7EMN2;K7EPF6	6	5	35.4032	1.37255e-05	4.86247	0.000106692	2.22914	1	CM55	PM54	53653.3	PGD	6-phosphogluconate dehydrogenase_ decarboxylating OS=Homo sapiens OX=9606 GN=PGD PE=1 SV=3	2357.45	2187.86	2352.3	2299.2	3.36158	0.0419535	3	351	1025.32	1068.79	1000.18	1031.43	3.01344	0.0336548	3	606	0.448603	-1.15649	DOWN
Q68DG0;Q8N241;Q9UBY9;Q9UBY9-2;C9J5A3;D3YTC6	3	2	21.9597	0.000210441	3.67687	0.000372119	2.21381	1	CM55	PM54	19074	HSPB7	Heat shock protein beta-7 OS=Homo sapiens OX=9606 GN=HSPB7 PE=1 SV=1	1832.7	1703.04	1495.18	1676.97	3.22453	0.10153	3	467	763.556	774.089	734.865	757.503	2.87938	0.0267995	3	741	0.451709	-1.14653	DOWN
P60228;E5RGA2;H0YBR5	2	2	4.718	1.83532e-05	4.73629	0.000111097	2.20266	1	CM55	PM54	52620.1	EIF3E	Eukaryotic translation initiation factor 3 subunit E OS=Homo sapiens OX=9606 GN=EIF3E PE=1 SV=1	5376.41	5489.65	5067.05	5311.04	3.72518	0.0411883	3	168	2341.44	2521.04	2371.11	2411.2	3.38223	0.0399297	3	284	0.453997	-1.13924	DOWN
P21675;P21675-10;P21675-11;P21675-12;P21675-2;P21675-3;P21675-4;P21675-5;P21675-6;P21675-7;P21675-8;P21675-9	3	1	12.1538	0.000330934	3.48026	0.000511169	2.19295	1	CM55	PM54	214103	TAF1	Transcription initiation factor TFIID subunit 1 OS=Homo sapiens OX=9606 GN=TAF1 PE=1 SV=2	11329.7	11817.7	13991	12379.5	4.0927	0.114448	3	72	5428.94	5864.25	5642.16	5645.12	3.75167	0.0385588	3	134	0.456006	-1.13287	DOWN
J3KTL2;Q07955;Q07955-2;Q07955-3;J3KSR8	3	1	17.0911	2.57202e-05	4.58973	0.000118249	2.1665	1	CM55	PM54	28443.3	SRSF1	Serine/arginine-rich-splicing factor 1 OS=Homo sapiens OX=9606 GN=SRSF1 PE=1 SV=1	1986.18	2096.02	1855.93	1979.38	3.29653	0.0607202	3	400	912.287	911.62	916.979	913.629	2.96077	0.00319634	3	660	0.461574	-1.11537	DOWN
P27816	22	1	145.018	3.98457e-06	5.39962	5.76714e-05	2.16256	1	CM55	PM54	121518	MAP4	Microtubule-associated protein 4 OS=Homo sapiens OX=9606 GN=MAP4 PE=1 SV=3	1510.38	1464.51	1402.69	1459.19	3.16411	0.0370367	3	524	668.011	677.506	678.744	674.754	2.82915	0.00870302	3	791	0.462416	-1.11274	DOWN
A0A1W2PRS1;A0A1W2PS43;Q14108;A0A1W2PPX5;A0A1W2PQB7;A0A1W2PQR6;A0A1W2PPU6;A0A1W2PRF6;Q14108-2;A0A1W2PNX7;A0A1W2PS70;A0A1W2PSE4;D6RDG0	7	1	48.2496	0.00812506	2.09017	0.00447209	2.15117	0.946997	CM55	PM54	58561.6	SCARB2	Lysosome membrane protein 2 (Fragment) OS=Homo sapiens OX=9606 GN=SCARB2 PE=1 SV=1	424.88	467.872	335.685	409.479	2.61223	0.164663	3	1085	234.699	153.366	182.99	190.352	2.27956	0.216247	3	1419	0.464863	-1.10512	DOWN
O00264	3	2	17.3574	4.96508e-06	5.30407	6.06344e-05	2.1419	1	CM55	PM54	21785.2	PGRMC1	Membrane-associated progesterone receptor component 1 OS=Homo sapiens OX=9606 GN=PGRMC1 PE=1 SV=3	4975.05	4876.31	4854.27	4901.88	3.69036	0.0131215	3	175	2361.2	2194.21	2310.27	2288.56	3.35956	0.037399	3	302	0.466874	-1.09889	DOWN
Q4AC94;Q4AC94-1;Q4AC94-3;Q4AC94-4;Q4AC94-2	18	4	70.8359	2.18956e-05	4.65964	0.00011491	2.11293	1	CM55	PM54	262784	C2CD3	C2 domain-containing protein 3 OS=Homo sapiens OX=9606 GN=C2CD3 PE=1 SV=4	7156.57	7391.43	6831.36	7126.45	3.85287	0.0394654	3	121	3220.14	3416.76	3481.45	3372.78	3.52799	0.0403512	3	213	0.473276	-1.07925	DOWN
Q8N573;Q8N573-8;Q8N573-2;Q8N573-5;H0YC07	5	1	23.2946	0.00135918	2.86672	0.00124101	2.10351	0.999861	CM55	PM54	98540.6	OXR1	Oxidation resistance protein 1 OS=Homo sapiens OX=9606 GN=OXR1 PE=1 SV=2	578.165	615.132	565.415	586.237	2.76807	0.0440478	3	924	246.525	258.663	330.897	278.695	2.44513	0.16367	3	1232	0.475396	-1.0728	DOWN
Q8TE49;Q8TE49-2;H0YN66	6	1	35.1135	0.000974082	3.0114	0.000996213	2.09245	0.999979	CM55	PM54	101589	OTUD7A	OTU domain-containing protein 7A OS=Homo sapiens OX=9606 GN=OTUD7A PE=1 SV=1	781.403	885.165	929.959	865.509	2.93727	0.088045	3	737	381.11	388.42	471.371	413.634	2.61662	0.121207	3	1046	0.477908	-1.06519	DOWN
P19525;P19525-2	4	1	19.6883	0.0270104	1.56847	0.0113499	2.0886	0.724224	CM55	PM54	62550.6	EIF2AK2	Interferon-induced_ double-stranded RNA-activated protein kinase OS=Homo sapiens OX=9606 GN=EIF2AK2 PE=1 SV=2	281.842	330.372	185.246	265.82	2.42459	0.277924	3	1267	115.078	159.807	106.931	127.272	2.10473	0.223687	3	1573	0.478791	-1.06253	DOWN
Q9NPP4	5	1	19.8576	0.00295223	2.52985	0.00210914	2.08446	0.996205	CM55	PM54	117471	NLRC4	NLR family CARD domain-containing protein 4 OS=Homo sapiens OX=9606 GN=NLRC4 PE=1 SV=2	325.879	376.956	307.211	336.682	2.52722	0.10724	3	1161	159.075	135.65	189.835	161.52	2.20823	0.168248	3	1484	0.479741	-1.05967	DOWN
Q96PY5;Q96PY5-3;C9IZY8	3	2	15.9284	1.28847e-05	4.88992	0.000106494	2.0702	1	CM55	PM54	123777	FMNL2	Formin-like protein 2 OS=Homo sapiens OX=9606 GN=FMNL2 PE=1 SV=3	1405.04	1504.52	1444.43	1451.33	3.16177	0.034516	3	526	715.834	713.49	673.855	701.06	2.84575	0.033648	3	774	0.483046	-1.04977	DOWN
E9PMR3;Q9BUR4;E9PMG4	2	1	10.2389	0.0293461	1.53245	0.0120085	2.06848	0.702684	CM55	PM54	31268.1	WRAP53	Telomerase Cajal body protein 1 OS=Homo sapiens OX=9606 GN=WRAP53 PE=1 SV=1	410.988	270.931	265.151	315.69	2.49926	0.261589	3	1197	106.707	166.584	184.568	152.619	2.18361	0.267104	3	1508	0.483448	-1.04857	DOWN
P21980;P21980-2;A2A299;P21980-3;A2A2A0	27	20	169.679	8.46939e-05	4.07215	0.000219189	2.06446	1	CM55	PM54	78469.5	TGM2	Protein-glutamine gamma-glutamyltransferase 2 OS=Homo sapiens OX=9606 GN=TGM2 PE=1 SV=2	17165.5	18022.9	18808.7	17999	4.25525	0.045663	3	38	8364.64	8433	9357.98	8718.54	3.94044	0.0636371	3	80	0.484389	-1.04576	DOWN
O00151	8	2	50.3201	0.000187685	3.72657	0.000342735	2.03079	1	CM55	PM54	36528	PDLIM1	PDZ and LIM domain protein 1 OS=Homo sapiens OX=9606 GN=PDLIM1 PE=1 SV=4	1758.28	2011.62	1946.91	1905.6	3.28003	0.0690731	3	417	892.827	919.504	1002.73	938.354	2.97237	0.0610912	3	648	0.492419	-1.02204	DOWN
P10599;P10599-2	9	9	61.3227	6.67659e-06	5.17545	7.27912e-05	2.02707	1	CM55	PM54	12022.7	TXN	Thioredoxin OS=Homo sapiens OX=9606 GN=TXN PE=1 SV=3	12334	12670.9	12072.7	12359.2	4.09199	0.0242646	3	73	6210.67	5876.67	6203.93	6097.09	3.78512	0.0313129	3	123	0.493324	-1.01939	DOWN
P30520	6	2	28.8832	8.34459e-05	4.07859	0.000217399	2.0244	1	CM55	PM54	50496.6	ADSS	Adenylosuccinate synthetase isozyme 2 OS=Homo sapiens OX=9606 GN=ADSS PE=1 SV=3	4441.94	4380.83	3914.26	4245.68	3.62795	0.0679842	3	198	2119.45	2141.93	2030.37	2097.25	3.32165	0.0281339	3	331	0.493973	-1.0175	DOWN
P02452;I3L3H7	20	12	126.703	1.63134e-05	4.78746	0.000108053	2.02109	1	CM55	PM54	139968	COL1A1	Collagen alpha-1(I) chain OS=Homo sapiens OX=9606 GN=COL1A1 PE=1 SV=5	7126.62	6853.64	6779.81	6920.03	3.84011	0.0263998	3	129	3508.45	3503.9	3259.36	3423.9	3.53452	0.0416251	3	210	0.494782	-1.01513	DOWN
H7BZJ3	7	4	37.9104	2.71715e-06	5.56589	4.58311e-05	2.01487	1	CM55	PM54	13747.4	PDIA3	Protein disulfide-isomerase A3 (Fragment) OS=Homo sapiens OX=9606 GN=PDIA3 PE=1 SV=1	8334.29	8033.64	8339.3	8235.74	3.9157	0.0212542	3	104	3993.73	4085.8	4182.93	4087.49	3.61146	0.023147	3	178	0.496311	-1.01068	DOWN
P07996;P07996-2;A8MZG1	15	10	73.3646	1.74069e-06	5.75928	4.00142e-05	2.00278	1	CM55	PM54	133375	THBS1	Thrombospondin-1 OS=Homo sapiens OX=9606 GN=THBS1 PE=1 SV=2	2449.53	2570.15	2531.06	2516.91	3.40087	0.0244523	3	325	1260.22	1238.52	1271.38	1256.71	3.09923	0.0132987	3	522	0.499305	-1.00201	DOWN
O75914-3;B1AKS5;O75914;A0A087X294;O75914-2;O75914-4	3	1	15.6379	0.000372424	3.42896	0.000563008	1.99948	1	CM55	PM54	64872.4	PAK3	Isoform 3 of Serine/threonine-protein kinase PAK 3 OS=Homo sapiens OX=9606 GN=PAK3	1341.64	1622.08	1561.48	1508.4	3.17852	0.0978275	3	507	785.053	727.283	750.848	754.395	2.8776	0.0385047	3	744	0.50013	-0.999625	DOWN
P13674;P13674-2;P13674-3	12	8	76.536	2.56906e-05	4.59023	0.000118249	1.99715	1	CM55	PM54	61334.5	P4HA1	Prolyl 4-hydroxylase subunit alpha-1 OS=Homo sapiens OX=9606 GN=P4HA1 PE=1 SV=2	4356.18	4539.19	4341.42	4412.26	3.64466	0.0249684	3	190	2316.47	2210.25	2101.13	2209.28	3.34425	0.0487367	3	315	0.500713	-0.997944	DOWN
P23246;P23246-2;H0Y9K7;H0Y9U2	6	3	34.1945	0.0276212	1.55876	0.0115287	1.98684	0.718466	CM55	PM54	76263.6	SFPQ	Splicing factor_ proline- and glutamine-rich OS=Homo sapiens OX=9606 GN=SFPQ PE=1 SV=2	172.171	195.496	241.142	202.936	2.30736	0.172873	3	1386	127.834	69.0597	109.528	102.14	2.0092	0.294452	3	1637	0.503313	-0.990472	DOWN
P29279;P29279-2	4	1	19.0873	0.0105158	1.97816	0.005472	1.97243	0.916026	CM55	PM54	40315.6	CTGF	Connective tissue growth factor OS=Homo sapiens OX=9606 GN=CTGF PE=1 SV=2	625.461	521.555	693.42	613.478	2.7878	0.141091	3	896	381.242	306.15	245.687	311.026	2.4928	0.218339	3	1177	0.506988	-0.979977	DOWN
Q96D15;M0QYB8;M0QZH0	5	5	29.0228	1.94028e-05	4.71214	0.000111097	1.95566	1	CM55	PM54	37493	RCN3	Reticulocalbin-3 OS=Homo sapiens OX=9606 GN=RCN3 PE=1 SV=1	3435.35	3385.97	3558.28	3459.87	3.53906	0.0256453	3	237	1786.51	1687.67	1833.29	1769.16	3.24777	0.0420223	3	390	0.511336	-0.967656	DOWN
Q9UKY1	3	1	16.9679	1.39867e-05	4.85429	0.000106692	1.94548	1	CM55	PM54	98553.9	ZHX1	Zinc fingers and homeoboxes protein 1 OS=Homo sapiens OX=9606 GN=ZHX1 PE=1 SV=1	2101.19	2034.31	1932.65	2022.72	3.30593	0.0419559	3	391	1042.02	1055.11	1021.98	1039.7	3.01691	0.0160478	3	601	0.514013	-0.960124	DOWN
P46734;P46734-3;P46734-2;J3KRV4;J3QR49;E9PMA8;J3QL77;X6RB39	9	2	46.2776	0.0108634	1.96403	0.00563787	1.94482	0.911436	CM55	PM54	39660.7	MAP2K3	Dual specificity mitogen-activated protein kinase kinase 3 OS=Homo sapiens OX=9606 GN=MAP2K3 PE=1 SV=2	229.266	276.281	264.498	256.682	2.40939	0.0953024	3	1289	168.896	104.62	122.431	131.982	2.12052	0.251438	3	1561	0.514187	-0.959636	DOWN
A0A1C7CYX9;Q16555;Q16555-2;E5RFU4	10	3	70.2819	7.02386e-05	4.15342	0.000199973	1.93875	1	CM55	PM54	74073.3	DPYSL2	Dihydropyrimidinase-related protein 2 OS=Homo sapiens OX=9606 GN=DPYSL2 PE=1 SV=1	2591.51	2773.02	2883.88	2749.47	3.43925	0.0536827	3	289	1353.03	1451.37	1450.09	1418.16	3.15173	0.0397779	3	468	0.515795	-0.95513	DOWN
P00558;P00558-2	35	20	210.036	1.30804e-05	4.88338	0.000106494	1.9377	1	CM55	PM54	45014	PGK1	Phosphoglycerate kinase 1 OS=Homo sapiens OX=9606 GN=PGK1 PE=1 SV=3	25776.4	25418.4	26170.8	25788.5	4.41143	0.0145932	3	24	12930.8	13042.2	13953.5	13308.8	4.12414	0.0421557	3	51	0.516075	-0.954346	DOWN
P23381;P23381-2;G3V3H8;G3V3Y5;G3V277;G3V423;G3V456;G3V5U1;H0YJP3	9	5	56.231	8.78487e-06	5.05626	8.17389e-05	1.93282	1	CM55	PM54	53507.7	WARS	Tryptophan--tRNA ligase_ cytoplasmic OS=Homo sapiens OX=9606 GN=WARS PE=1 SV=2	2532.04	2730.75	2622.84	2628.55	3.41972	0.037845	3	310	1377.97	1357.09	1344.81	1359.95	3.13352	0.0123297	3	489	0.517379	-0.950707	DOWN
Q9NR48;Q9NR48-2;F8VWK7	19	6	104.763	0.00310815	2.5075	0.00216906	1.93125	0.995486	CM55	PM54	336383	ASH1L	Histone-lysine N-methyltransferase ASH1L OS=Homo sapiens OX=9606 GN=ASH1L PE=1 SV=2	386.448	342.023	302.985	343.819	2.53633	0.121461	3	1148	187.111	152.375	194.601	178.029	2.25049	0.126554	3	1446	0.517799	-0.949535	DOWN
P35609;P35609-2	21	1	186.178	0.0139639	1.85499	0.00686801	1.91793	0.87076	CM55	PM54	104424	ACTN2	Alpha-actinin-2 OS=Homo sapiens OX=9606 GN=ACTN2 PE=1 SV=1	266.185	292.354	215.273	257.937	2.41151	0.151961	3	1285	162.272	104.081	137.109	134.487	2.12868	0.217001	3	1554	0.521396	-0.939549	DOWN
Q9BV73;Q9BV73-2;E7ETF9;H7C0P0	9	2	38.9585	0.0111112	1.95424	0.00574358	1.91197	0.908162	CM55	PM54	282050	CEP250	Centrosome-associated protein CEP250 OS=Homo sapiens OX=9606 GN=CEP250 PE=1 SV=2	792.195	1137.74	845.964	925.299	2.96628	0.200942	3	707	576.146	433.964	441.74	483.95	2.6848	0.16518	3	960	0.52302	-0.935062	DOWN
A0AUZ9;A0AUZ9-2	3	2	13.4328	0.000777583	3.10925	0.000858394	1.91066	0.999995	CM55	PM54	113337	KANSL1L	KAT8 regulatory NSL complex subunit 1-like protein OS=Homo sapiens OX=9606 GN=KANSL1L PE=1 SV=2	1029.3	989.828	1099.26	1039.46	3.01681	0.053317	3	653	476.989	579.532	575.578	544.033	2.73563	0.106787	3	898	0.523379	-0.934071	DOWN
Q15084;Q15084-2;Q15084-3;Q15084-4;Q15084-5	8	5	51.1466	6.89188e-06	5.16166	7.27912e-05	1.91062	1	CM55	PM54	48520.6	PDIA6	Protein disulfide-isomerase A6 OS=Homo sapiens OX=9606 GN=PDIA6 PE=1 SV=1	9277.97	8824.37	8774.32	8958.89	3.95225	0.0309708	3	94	4588.85	4701.37	4776.77	4688.99	3.67108	0.0201679	3	157	0.52339	-0.934041	DOWN
P04899;P04899-4;P04899-2;P04899-3;P04899-5;P04899-6;P08754;A8MTJ3;P19087;A0A087WZE5;A0A1W2PP38	12	4	82.6338	2.78496e-05	4.55518	0.000125096	1.90245	1	CM55	PM54	41021.3	GNAI2	Guanine nucleotide-binding protein G(i) subunit alpha-2 OS=Homo sapiens OX=9606 GN=GNAI2 PE=1 SV=3	3310.99	3206.55	3231.43	3249.66	3.51184	0.0167878	3	250	1658.04	1659.91	1806.48	1708.14	3.23252	0.0498609	3	408	0.525638	-0.92786	DOWN
Q9H361	3	1	18.3148	0.0009884	3.00507	0.000998206	1.89251	0.999977	CM55	PM54	70259.2	PABPC3	Polyadenylate-binding protein 3 OS=Homo sapiens OX=9606 GN=PABPC3 PE=1 SV=2	1343.2	1449.04	1440.68	1410.97	3.14952	0.0417037	3	534	785.927	645.197	805.549	745.558	2.87248	0.117317	3	748	0.5284	-0.920299	DOWN
Q9Y2I7;C9JL08;E9PDH4;F8WEZ0;Q9Y2I7-2;Q9Y2I7-3;Q9Y2I7-4	8	3	35.4771	0.00153704	2.81332	0.00133479	1.88264	0.999741	CM55	PM54	239760	PIKFYVE	1-phosphatidylinositol 3-phosphate 5-kinase OS=Homo sapiens OX=9606 GN=PIKFYVE PE=1 SV=3	317.703	297.054	330.772	315.177	2.49855	0.0539403	3	1200	178.014	142.835	181.388	167.412	2.22379	0.127538	3	1465	0.53117	-0.912755	DOWN
A0A096LP62;C9J2H1;G5E9D8;H7C5A6;Q86UX2;Q86UX2-2;Q86UX2-3	2	1	9.6378	0.000143331	3.84366	0.000287973	1.87012	1	CM55	PM54	80974.3	ITIH5	Inter-alpha-trypsin inhibitor heavy chain H5 OS=Homo sapiens OX=9606 GN=ITIH5 PE=1 SV=1	1489.37	1326.18	1513.73	1443.09	3.15929	0.0706689	3	527	759.189	793.72	762.063	771.658	2.88742	0.0248308	3	736	0.534724	-0.903133	DOWN
A6ND36	7	1	32.6385	0.00113438	2.94524	0.00109188	1.87011	0.999948	CM55	PM54	91120.3	FAM83G	Protein FAM83G OS=Homo sapiens OX=9606 GN=FAM83G PE=1 SV=2	1121.8	1323.17	1327.1	1257.35	3.09946	0.0933798	3	582	718.436	607.745	690.846	672.342	2.82759	0.085699	3	792	0.534729	-0.903121	DOWN
Q9NR45;Q5TBR0;Q5TBR1	4	2	24.9105	0.00546917	2.26208	0.00334999	1.869	0.977459	CM55	PM54	40763.8	NANS	Sialic acid synthase OS=Homo sapiens OX=9606 GN=NANS PE=1 SV=2	1209.49	909.58	841.274	986.781	2.99422	0.198495	3	673	505.915	539.014	538.985	527.971	2.72261	0.036179	3	914	0.535044	-0.90227	DOWN
P14314;K7ELL7;P14314-2;A0A0C4DGP4;K7EJ70;K7EKX1;K7EPW7	11	9	61.8248	1.99003e-05	4.70114	0.000111097	1.85119	1	CM55	PM54	60395	PRKCSH	Glucosidase 2 subunit beta OS=Homo sapiens OX=9606 GN=PRKCSH PE=1 SV=2	3301.81	3249.72	3136.66	3229.4	3.50912	0.026144	3	251	1774.72	1670.44	1788.35	1744.5	3.24167	0.0369746	3	395	0.540194	-0.888449	DOWN
H3BRJ5;Q9P2H3;Q9P2H3-2;Q9P2H3-3;C9IZR2;C9JUJ1	2	2	14.4737	0.000202814	3.6929	0.000362674	1.84446	1	CM55	PM54	109936	Uncharacterized protein OS=Homo sapiens OX=9606	Uncharacterized protein OS=Homo sapiens OX=9606 PE=4 SV=1	568.11	515.317	506.594	530.007	2.72428	0.0628018	3	969	298.385	293.505	270.164	287.351	2.45841	0.0524901	3	1219	0.542165	-0.883197	DOWN
P49419;A0A1B0GTG2;A0A1B0GUA1;A0A1B0GW77;A0A1B0GW82;P49419-2;A0A0J9YWF7;A0A1B0GTY9;H0YHM6;P49419-4;A0A1B0GTJ4;A0A1B0GV49;A0A1B0GUY0;F8WDY6;A0A1B0GVU0;F8VVF2	6	3	34.389	0.000313179	3.50421	0.000493496	1.8433	1	CM55	PM54	59057.5	ALDH7A1	Alpha-aminoadipic semialdehyde dehydrogenase OS=Homo sapiens OX=9606 GN=ALDH7A1 PE=1 SV=5	749.799	894.632	809.741	818.058	2.91278	0.0889594	3	761	448.19	433.67	449.539	443.8	2.64719	0.0198254	3	1012	0.542504	-0.882293	DOWN
P62879;C9JIS1;C9JXA5;E7EP32;C9JZN1;P62879-2	5	2	34.0404	0.00260891	2.58354	0.00194567	1.84057	0.997549	CM55	PM54	38072.5	GNB2	Guanine nucleotide-binding protein G(I)/G(S)/G(T) subunit beta-2 OS=Homo sapiens OX=9606 GN=GNB2 PE=1 SV=3	461.481	597.724	574.564	544.59	2.73607	0.133861	3	955	289.278	278.282	320.084	295.881	2.47112	0.0732362	3	1197	0.543311	-0.880151	DOWN
P30041	23	20	146.363	0.000283882	3.54686	0.000454665	1.83754	1	CM55	PM54	25149.1	PRDX6	Peroxiredoxin-6 OS=Homo sapiens OX=9606 GN=PRDX6 PE=1 SV=3	10967.1	12140.2	12989	12032.1	4.08034	0.0843802	3	75	6413.59	6524.08	6706.19	6547.96	3.81611	0.0225648	3	111	0.544206	-0.877776	DOWN
Q5VV41;B0QZD3;Q5VV41-2	2	1	8.1646	0.00903681	2.04398	0.00481786	1.83379	0.935377	CM55	PM54	80390.3	ARHGEF16	Rho guanine nucleotide exchange factor 16 OS=Homo sapiens OX=9606 GN=ARHGEF16 PE=1 SV=1	606.139	635.747	670.432	637.44	2.80444	0.0504828	3	875	309.811	292.449	440.562	347.607	2.54109	0.232929	3	1129	0.545318	-0.874831	DOWN
P35228	3	2	11.2351	0.0045573	2.34129	0.00290478	1.83127	0.98583	CM55	PM54	132657	NOS2	Nitric oxide synthase_ inducible OS=Homo sapiens OX=9606 GN=NOS2 PE=1 SV=2	419.611	377.5	522.568	439.893	2.64335	0.169656	3	1050	224.163	238.523	257.952	240.213	2.3806	0.0705957	3	1309	0.54607	-0.872842	DOWN
Q8TCU4;A0A087WTU9;Q8TCU4-2;A0A087WV20;Q8TCU4-3	36	5	164.36	0.000106296	3.97348	0.000240673	1.82956	1	CM55	PM54	463458	ALMS1	Alstrom syndrome protein 1 OS=Homo sapiens OX=9606 GN=ALMS1 PE=1 SV=4	1073.73	1096.37	1195.85	1121.98	3.04999	0.0578991	3	624	624.321	587.142	628.297	613.253	2.78764	0.0370164	3	826	0.546581	-0.871494	DOWN
Q9NTJ5;E9PGZ4;Q9NTJ5-2;C9JV50	3	2	12.7548	0.00148819	2.82734	0.00131279	1.82725	0.999779	CM55	PM54	67480.3	SACM1L	Phosphatidylinositide phosphatase SAC1 OS=Homo sapiens OX=9606 GN=SACM1L PE=1 SV=2	1242.06	1377.34	1169.38	1262.93	3.10138	0.083564	3	578	735.105	608.957	729.428	691.163	2.83958	0.103086	3	780	0.547272	-0.869671	DOWN
E9PKH8;P11836;E9PPL6;P11836-2	4	1	19.0628	0.000516224	3.28716	0.000695638	1.82709	1	CM55	PM54	31894.7	MS4A1	B-lymphocyte antigen CD20 OS=Homo sapiens OX=9606 GN=MS4A1 PE=1 SV=1	2540.17	2458.17	2738.04	2578.8	3.41142	0.0557916	3	317	1390.15	1300.8	1543.31	1411.42	3.14966	0.0868938	3	472	0.547318	-0.869549	DOWN
Q4LE39;Q4LE39-2;Q4LE39-3	3	1	12.6799	0.0118623	1.92583	0.00602032	1.82127	0.89824	CM55	PM54	148893	ARID4B	AT-rich interactive domain-containing protein 4B OS=Homo sapiens OX=9606 GN=ARID4B PE=1 SV=2	989.849	955.604	676.638	874.03	2.94153	0.196563	3	733	536.75	453.427	449.524	479.901	2.68115	0.102671	3	965	0.549066	-0.864948	DOWN
O95816;O95816-2	2	1	15.4416	0.00597779	2.22346	0.00357743	1.81486	0.972209	CM55	PM54	23943.1	BAG2	BAG family molecular chaperone regulator 2 OS=Homo sapiens OX=9606 GN=BAG2 PE=1 SV=1	145.246	176.431	132.907	151.528	2.18049	0.148036	3	1502	96.2476	77.0475	77.1845	83.4932	1.92165	0.132296	3	1682	0.551008	-0.859856	DOWN
O75976;O75976-2	3	1	8.1534	1.48088e-05	4.82948	0.000106949	1.81264	1	CM55	PM54	154015	CPD	Carboxypeptidase D OS=Homo sapiens OX=9606 GN=CPD PE=1 SV=2	2279.25	2192.64	2211.64	2227.84	3.34788	0.020433	3	362	1228.79	1185.51	1272.88	1229.06	3.08957	0.0355425	3	534	0.551682	-0.85809	DOWN
Q8N0Y7	5	1	40.7565	0.000175404	3.75596	0.000326448	1.80992	1	CM55	PM54	28948	PGAM4	Probable phosphoglycerate mutase 4 OS=Homo sapiens OX=9606 GN=PGAM4 PE=3 SV=1	810.414	921.693	915.158	882.422	2.94568	0.0707664	3	730	492.028	496.033	474.582	487.548	2.68802	0.023394	3	952	0.552511	-0.855924	DOWN
Q9C040;Q9C040-2;A0A0J9YX34;A0A0J9YW70;A0A0J9YXY2;C9JVI3	3	2	13.618	0.00307992	2.51146	0.00216906	1.80698	0.995621	CM55	PM54	82556.8	TRIM2	Tripartite motif-containing protein 2 OS=Homo sapiens OX=9606 GN=TRIM2 PE=1 SV=1	961.152	936.986	1074.47	990.871	2.99602	0.0740806	3	671	578.805	461.871	604.4	548.359	2.73906	0.13857	3	892	0.553411	-0.853578	DOWN
Q9UKX5;Q9UKX5-2	2	1	8.8984	0.0174878	1.75727	0.00811644	1.79769	0.826669	CM55	PM54	134611	ITGA11	Integrin alpha-11 OS=Homo sapiens OX=9606 GN=ITGA11 PE=1 SV=2	615.838	385.143	473.757	491.58	2.69159	0.236738	3	1004	247.555	274.099	298.698	273.45	2.43688	0.0935367	3	1239	0.556269	-0.846146	DOWN
Q5THJ4;Q5THJ4-2;H3BLS7;A0A2R8YD87;F5GX56;A0A2R8Y876	29	2	140.608	0.0381282	1.41875	0.0148704	1.7932	0.632078	CM55	PM54	495680	VPS13D	Vacuolar protein sorting-associated protein 13D OS=Homo sapiens OX=9606 GN=VPS13D PE=1 SV=2	262.789	244.527	413.978	307.098	2.48728	0.302869	3	1211	153.549	200.577	159.645	171.257	2.23365	0.149331	3	1454	0.557661	-0.842539	DOWN
Q7Z5N4;F8W6X9;Q7Z5N4-3;A0A087WTQ6	9	1	46.989	0.00153518	2.81384	0.00133479	1.78666	0.999742	CM55	PM54	243139	SDK1	Protein sidekick-1 OS=Homo sapiens OX=9606 GN=SDK1 PE=2 SV=3	793.337	626.121	650.996	690.151	2.83894	0.130729	3	840	393.978	375.242	389.623	386.281	2.5869	0.0253834	3	1079	0.559705	-0.837262	DOWN
E9PBS1;P22234;D6RF62;P22234-2	7	4	40.7675	4.21949e-05	4.37474	0.00015236	1.78587	1	CM55	PM54	46335.9	PAICS	Multifunctional protein ADE2 (Fragment) OS=Homo sapiens OX=9606 GN=PAICS PE=1 SV=1	1297.45	1293.28	1326.06	1305.6	3.11581	0.0136692	3	561	691.466	763.066	738.679	731.07	2.86396	0.049792	3	753	0.55995	-0.836629	DOWN
Q96AY3;H0Y827;K7ELI6;K7ESG6;Q96AY3-2;K7EM43;C9JPC3	19	13	103.743	2.28255e-05	4.64158	0.00011491	1.78463	1	CM55	PM54	64758.4	FKBP10	Peptidyl-prolyl cis-trans isomerase FKBP10 OS=Homo sapiens OX=9606 GN=FKBP10 PE=1 SV=1	7679.36	7613.48	7707.58	7666.8	3.88461	0.00629866	3	117	4088.99	4454.84	4344.25	4296.03	3.63307	0.0436761	3	168	0.560341	-0.835622	DOWN
P0DMV8;A0A0G2JIW1;P0DMV9;P0DMV8-2;V9GZ37	20	7	121.365	2.86255e-05	4.54325	0.000125691	1.78392	1	CM55	PM54	70337.5	HSPA1A	Heat shock 70 kDa protein 1A OS=Homo sapiens OX=9606 GN=HSPA1A PE=1 SV=1	2323.71	2210.41	2342.66	2292.26	3.36026	0.0311997	3	352	1262.09	1337.18	1255.59	1284.95	3.10889	0.0352903	3	513	0.560562	-0.835054	DOWN
P05023;P05023-4;P05023-2;P05023-3;Q5TC01;Q5TC02	9	3	52.6603	0.00020796	3.68202	0.000369404	1.78345	1	CM55	PM54	114208	ATP1A1	Sodium/potassium-transporting ATPase subunit alpha-1 OS=Homo sapiens OX=9606 GN=ATP1A1 PE=1 SV=1	1509.98	1751.71	1636.8	1632.83	3.21294	0.0740506	3	477	896.737	936.291	913.608	915.545	2.96168	0.0216793	3	658	0.56071	-0.834672	DOWN
Q99733;Q99733-2;C9JZI7;H0YCI4;A8MXH2;C9J6D1;E9PJJ2;E9PKT8;E9PNJ7;E9PNW0;E9PS34	5	2	32.2638	0.0021017	2.67743	0.00165367	1.78026	0.998942	CM55	PM54	42994.6	NAP1L4	Nucleosome assembly protein 1-like 4 OS=Homo sapiens OX=9606 GN=NAP1L4 PE=1 SV=1	715.655	848.285	861.237	808.392	2.90762	0.0996715	3	770	483.527	473.507	405.23	454.088	2.65714	0.0938316	3	1004	0.561717	-0.832084	DOWN
P08238;Q58FF7;Q58FF6;Q58FG1	56	28	330.025	0.000107404	3.96898	0.000240673	1.77429	1	CM55	PM54	83606.5	HSP90AB1	Heat shock protein HSP 90-beta OS=Homo sapiens OX=9606 GN=HSP90AB1 PE=1 SV=4	13484.8	12800.5	14103.6	13463	4.12914	0.0484154	3	62	7233.06	7875.41	7655	7587.82	3.88012	0.0430166	3	87	0.563606	-0.82724	DOWN
P60033;A6NMH8;E9PIF1;E9PJK1;E9PRJ8;H0YDJ9;H0YDL9;E9PM31;H0YEE2	3	3	19.2363	8.21141e-06	5.08558	7.82667e-05	1.76987	1	CM55	PM54	26493.8	CD81	CD81 antigen OS=Homo sapiens OX=9606 GN=CD81 PE=1 SV=1	2743.14	2788.11	2756.98	2762.74	3.44134	0.00833565	3	288	1525.97	1536.55	1620.45	1560.99	3.1934	0.0331606	3	439	0.565014	-0.823641	DOWN
B4DLR8;H3BNV2;H3BRK3;P15559;P15559-2;P15559-3	2	1	19.6397	0.0013305	2.87598	0.00122629	1.76977	0.999875	CM55	PM54	22850.3	NQO1	NAD(P)H dehydrogenase [quinone] 1 OS=Homo sapiens OX=9606 GN=NQO1 PE=1 SV=1	2042.46	2144.53	2391.34	2192.77	3.34099	0.0818022	3	370	1174.81	1376.83	1165.41	1239.01	3.09308	0.0964025	3	531	0.565044	-0.823564	DOWN
O14672;C9J9B4;O14672-2	4	2	18.353	0.00134102	2.87256	0.00123308	1.7581	0.99987	CM55	PM54	86195.2	ADAM10	Disintegrin and metalloproteinase domain-containing protein 10 OS=Homo sapiens OX=9606 GN=ADAM10 PE=1 SV=1	564.689	508.704	622.343	565.245	2.75224	0.100525	3	939	346.093	316.211	302.223	321.509	2.50719	0.0697019	3	1158	0.568795	-0.814018	DOWN
Q9NS87;Q9NS87-2;C9JKA9;Q9NS87-4;D6RCT7	12	1	46.1156	0.00143633	2.84275	0.00128264	1.75708	0.999815	CM55	PM54	161130	KIF15	Kinesin-like protein KIF15 OS=Homo sapiens OX=9606 GN=KIF15 PE=1 SV=1	1182.71	954.766	1065.25	1067.57	3.0284	0.106775	3	639	605.514	646.788	570.454	607.586	2.78361	0.0628867	3	834	0.569127	-0.813177	DOWN
P50995;P50995-2;H0Y6E1	13	3	66.2782	5.40087e-05	4.26754	0.000178865	1.74262	1	CM55	PM54	54732	ANXA11	Annexin A11 OS=Homo sapiens OX=9606 GN=ANXA11 PE=1 SV=1	1771.37	1755.32	1637.06	1721.25	3.23584	0.0426157	3	451	974.888	1022.59	965.736	987.736	2.99464	0.030904	3	624	0.573848	-0.801259	DOWN
Q2KHR2;H0YLX2;Q2KHR2-2	7	2	27.2265	0.0285029	1.54511	0.0118119	1.73951	0.710312	CM55	PM54	147865	RFX7	DNA-binding protein RFX7 OS=Homo sapiens OX=9606 GN=RFX7 PE=1 SV=1	82.2812	127.314	130.401	113.332	2.05435	0.237666	3	1582	58.5318	66.0616	70.8618	65.1517	1.81393	0.0953945	3	1732	0.574874	-0.798682	DOWN
Q9Y4L1;A0A087X054;A0A087WWI4;E9PJ21;K7EQK2;Q9Y4L1-2;J3KTF1;J3QL06;J3QLE9;J3QQH7;Q9BST8	14	6	86.4811	8.13836e-06	5.08946	7.82667e-05	1.73756	1	CM55	PM54	111564	HYOU1	Hypoxia up-regulated protein 1 OS=Homo sapiens OX=9606 GN=HYOU1 PE=1 SV=1	1166.35	1122.06	1101.58	1130	3.05308	0.0292993	3	618	648.191	660.88	641.933	650.335	2.81314	0.0148439	3	804	0.575519	-0.797064	DOWN
Q7RTW8;A0A2R8YG28;Q7RTW8-4;Q7RTW8-5	2	1	9.6889	0.0477386	1.32113	0.0177574	1.73653	0.56975	CM55	PM54	129616	OTOA	Otoancorin OS=Homo sapiens OX=9606 GN=OTOA PE=1 SV=1	999.148	849.712	592.882	813.914	2.91058	0.252465	3	765	521.573	516.11	368.419	468.701	2.6709	0.185384	3	987	0.57586	-0.796209	DOWN
Q9UBS4	5	1	30.4307	0.0255032	1.59341	0.0108566	1.73582	0.738827	CM55	PM54	40799.1	DNAJB11	DnaJ homolog subfamily B member 11 OS=Homo sapiens OX=9606 GN=DNAJB11 PE=1 SV=1	427.537	650.084	463.936	513.852	2.71084	0.232316	3	979	334.834	305.416	247.839	296.029	2.47133	0.14948	3	1196	0.576098	-0.795613	DOWN
Q16851;A0A087WYS1;E7EUC7;Q16851-2;C9JNZ1;C9JQU9;C9JVG3;C9JWG0;C9JUW1;C9JTZ5;C9J6Q0	11	6	73.9613	3.54024e-05	4.45097	0.00014088	1.73275	1	CM55	PM54	57111.4	UGP2	UTP--glucose-1-phosphate uridylyltransferase OS=Homo sapiens OX=9606 GN=UGP2 PE=1 SV=5	2002.22	1921.05	1896.16	1939.81	3.28776	0.0285927	3	407	1136.66	1071.97	1149.85	1119.5	3.04902	0.0372308	3	570	0.577117	-0.793065	DOWN
Q8NG31;Q8NG31-2;H0YCZ2;E9PPJ1;Q8NG31-3;Q8NG31-4	17	3	69.7925	0.000434335	3.36217	0.000624021	1.73221	1	CM55	PM54	268357	KNL1	Kinetochore scaffold 1 OS=Homo sapiens OX=9606 GN=KNL1 PE=1 SV=3	732.602	637.587	708.989	693.059	2.84077	0.0713792	3	838	378.065	418.209	404.026	400.1	2.60217	0.050882	3	1064	0.577296	-0.792617	DOWN
P11277;P11277-2;P11277-3;H0YJE6	19	1	89.0628	4.09306e-05	4.38795	0.000151461	1.7316	1	CM55	PM54	247324	SPTB	Spectrin beta chain_ erythrocytic OS=Homo sapiens OX=9606 GN=SPTB PE=1 SV=5	1901.95	2032.73	2038.77	1991.15	3.2991	0.0388274	3	397	1184.69	1146.76	1118.22	1149.89	3.06066	0.0289959	3	559	0.577499	-0.792109	DOWN
Q86W24	9	1	42.667	0.0247726	1.60603	0.010615	1.73017	0.746112	CM55	PM54	127699	NLRP14	NACHT_ LRR and PYD domains-containing protein 14 OS=Homo sapiens OX=9606 GN=NLRP14 PE=1 SV=1	825.114	579.712	689.842	698.223	2.84399	0.176041	3	833	348.978	505.613	356.083	403.558	2.60591	0.219184	3	1059	0.577979	-0.790912	DOWN
P18669;P15259	15	7	127.257	1.81988e-05	4.73996	0.000111097	1.72962	1	CM55	PM54	28918	PGAM1	Phosphoglycerate mutase 1 OS=Homo sapiens OX=9606 GN=PGAM1 PE=1 SV=2	9068.85	9620.59	9698.3	9462.58	3.97601	0.0362678	3	90	5378.11	5538.92	5495.66	5470.9	3.73806	0.0152109	3	139	0.578161	-0.790456	DOWN
H0YKT8;H0YL69;H0YMA1;H0YMZ1;H0YN18;P25789;H0YLC2;H0YLS6;H0YMI6;H0YKS0;P25789-2	3	1	19.9299	0.000871293	3.05984	0.000915301	1.72556	0.99999	CM55	PM54	20247.2	PSMA4	Proteasome subunit beta type (Fragment) OS=Homo sapiens OX=9606 GN=PSMA4 PE=1 SV=8	764.384	837.191	851.858	817.811	2.91265	0.057283	3	762	481.233	511.302	429.278	473.938	2.67572	0.087555	3	975	0.57952	-0.787069	DOWN
P29590;P29590-2;P29590-3;P29590-4;P29590-5;P29590-8;P29590-9;H3BT57;P29590-10;P29590-11;P29590-12;P29590-13;P29590-14	4	2	20.2871	0.00207	2.68403	0.00163652	1.72062	0.999006	CM55	PM54	99204.5	PML	Protein PML OS=Homo sapiens OX=9606 GN=PML PE=1 SV=3	410.816	471.543	492.053	458.137	2.661	0.0922105	3	1032	238.823	276.377	283.588	266.263	2.42531	0.0902711	3	1253	0.581186	-0.782928	DOWN
O75128;O75128-2;J3KR05;O75128-3;O75128-7;H7C1N2;O75128-6;A0A0J9YWK3;O75128-4;O75128-5;C9J9X1	7	1	34.4579	0.00186546	2.72921	0.00151325	1.71708	0.999363	CM55	PM54	136529	COBL	Protein cordon-bleu OS=Homo sapiens OX=9606 GN=COBL PE=1 SV=2	647.157	727.464	754.076	709.566	2.85099	0.0784442	3	820	369.323	420.199	450.2	413.241	2.6162	0.0989373	3	1048	0.582385	-0.779954	DOWN
P14625;A0A1W2PRR1;Q96GW1;H0YIV0;F8W026	48	26	302.686	2.17311e-05	4.66292	0.00011491	1.71653	1	CM55	PM54	92754.2	HSP90B1	Endoplasmin OS=Homo sapiens OX=9606 GN=HSP90B1 PE=1 SV=1	10407.8	10965.8	10805.9	10726.5	4.03046	0.0267872	3	82	6338.25	6029.42	6379.12	6248.93	3.79581	0.0305968	3	118	0.58257	-0.779497	DOWN
O14559;O14559-11;K7EMC2	6	2	24.6126	0.000283763	3.54704	0.000454665	1.70785	1	CM55	PM54	138525	ARHGAP33	Rho GTPase-activating protein 33 OS=Homo sapiens OX=9606 GN=ARHGAP33 PE=1 SV=2	361.868	329.284	338.274	343.142	2.53547	0.0490414	3	1149	193.537	193.961	215.262	200.92	2.30302	0.061827	3	1393	0.585531	-0.772183	DOWN
Q96TA1;Q96TA1-2	11	7	64.8482	9.04967e-05	4.04337	0.000227405	1.70716	1	CM55	PM54	84651.3	FAM129B	Niban-like protein 1 OS=Homo sapiens OX=9606 GN=FAM129B PE=1 SV=3	1281.97	1266.45	1318.32	1288.91	3.11022	0.0206548	3	570	786.854	768.823	709.334	755.004	2.87795	0.0537295	3	743	0.585767	-0.7716	DOWN
Q08AF3	3	1	14.5624	0.0242396	1.61547	0.0104439	1.70256	0.751515	CM55	PM54	102595	SLFN5	Schlafen family member 5 OS=Homo sapiens OX=9606 GN=SLFN5 PE=1 SV=1	206.808	179.779	223.64	203.409	2.30837	0.108781	3	1385	127.158	142.239	89.0207	119.473	2.07727	0.229583	3	1587	0.587352	-0.767704	DOWN
P11021;O95399;O95399-2;Q5H8X8	47	30	236.287	5.48488e-05	4.26083	0.00018012	1.69494	1	CM55	PM54	72447.1	HSPA5	Endoplasmic reticulum chaperone BiP OS=Homo sapiens OX=9606 GN=HSPA5 PE=1 SV=2	26384	24344.2	24483.4	25070.5	4.39916	0.0454557	3	25	14438	15116.3	14819.9	14791.4	4.17001	0.0229882	3	38	0.589992	-0.761234	DOWN
P09972;A8MVZ9;C9J8F3;J3KSV6;J3QKP5;K7EKH5;J3QKK1	9	2	53.7835	1.38175e-05	4.85957	0.000106692	1.69244	1	CM55	PM54	39855.1	ALDOC	Fructose-bisphosphate aldolase C OS=Homo sapiens OX=9606 GN=ALDOC PE=1 SV=2	2466.84	2435.89	2560.9	2487.88	3.39583	0.0261684	3	330	1442.55	1456.82	1510.6	1469.99	3.16731	0.0244134	3	456	0.590861	-0.759109	DOWN
F5GWQ8;J3QKW8;Q15846;R4GN76	4	1	19.5755	0.00883322	2.05388	0.00474186	1.68603	0.938	CM55	PM54	61161.1	CLUL1	Clusterin OS=Homo sapiens OX=9606 GN=CLUL1 PE=1 SV=1	497.642	630.346	697.116	608.368	2.78417	0.166901	3	903	346.873	345.015	390.596	360.828	2.5573	0.0714923	3	1115	0.593109	-0.753632	DOWN
P30101	30	20	179.848	9.82508e-05	4.00766	0.000228985	1.67493	1	CM55	PM54	57181.6	PDIA3	Protein disulfide-isomerase A3 OS=Homo sapiens OX=9606 GN=PDIA3 PE=1 SV=4	12391.7	11771	11341.7	11834.8	4.07316	0.044609	3	77	7221.29	7200.49	6775.72	7065.84	3.84916	0.0355883	3	97	0.597039	-0.744103	DOWN
O60812;A0A0G2JNQ3;A0A0G2JPF8;B2RXH8;B7ZW38;P0DMR1	8	2	45.5287	0.000279993	3.55285	0.000452142	1.67353	1	CM55	PM54	32199.5	HNRNPCL1	Heterogeneous nuclear ribonucleoprotein C-like 1 OS=Homo sapiens OX=9606 GN=HNRNPCL1 PE=1 SV=1	1674.95	1697.59	1726.12	1699.56	3.23034	0.0150881	3	457	1038.19	1074.72	933.731	1015.55	3.0067	0.0720527	3	613	0.597538	-0.742898	DOWN
Q06323;Q06323-2;Q06323-3;H0YKK6;H0YLU2	6	1	44.0294	2.25773e-05	4.64633	0.00011491	1.66836	1	CM55	PM54	28894.2	PSME1	Proteasome activator complex subunit 1 OS=Homo sapiens OX=9606 GN=PSME1 PE=1 SV=1	6730.63	7024.6	6590.24	6781.82	3.83135	0.0326841	3	133	3996.23	4165.63	4033.02	4064.96	3.60906	0.0219197	3	180	0.59939	-0.738433	DOWN
A0A1W2PPS1;Q00839;Q00839-2;A0A1W2PP35;A0A1X7SBS1;Q5RI18;A0A1W2PP34;A0A1W2PPH7;A0A1W2PPL4;A0A1W2PQL0;A0A1W2PQ74;A0A1W2PRZ7;A0A1W2PQD4;A0A1W2PP22	13	8	85.6728	0.000107216	3.96974	0.000240673	1.64506	1	CM55	PM54	89116.6	HNRNPU	Heterogeneous nuclear ribonucleoprotein U OS=Homo sapiens OX=9606 GN=HNRNPU PE=1 SV=1	6134.38	6519.76	6825.03	6493.06	3.81245	0.0533024	3	142	4026.39	3894.31	3920.32	3947.01	3.59627	0.0177265	3	185	0.607881	-0.718139	DOWN
O15460;O15460-2;E7ENX0;E7EPI9;E7ERI1;A8MXE0;C9JX45;C9JCP0;C9JIG4;C9JN43	15	13	87.7898	4.6572e-06	5.33187	5.87092e-05	1.64465	1	CM55	PM54	61301.2	P4HA2	Prolyl 4-hydroxylase subunit alpha-2 OS=Homo sapiens OX=9606 GN=P4HA2 PE=1 SV=1	3915.39	3791.57	3834.94	3847.3	3.58516	0.0163312	3	222	2310.79	2314.12	2392.95	2339.29	3.36908	0.0198784	3	295	0.608033	-0.717778	DOWN
P67809;H0Y449;C9J5V9;Q9Y2T7;A0A0D9SEI8;P16989;P16989-2;P16989-3	7	5	54.4757	0.000214064	3.66946	0.00037682	1.64091	1	CM55	PM54	35924.2	YBX1	Nuclease-sensitive element-binding protein 1 OS=Homo sapiens OX=9606 GN=YBX1 PE=1 SV=3	4844	4620.77	4649.06	4704.61	3.67252	0.0258348	3	180	2807.14	2724.63	3069.46	2867.08	3.45744	0.0628015	3	242	0.609418	-0.714496	DOWN
P29401;P29401-2;A0A0B4J1R6;E9PFF2;F8W888	10	7	79.8973	1.02179e-05	4.99064	9.28613e-05	1.64032	1	CM55	PM54	68562.1	TKT	Transketolase OS=Homo sapiens OX=9606 GN=TKT PE=1 SV=3	4561.63	4565.66	4741.49	4622.93	3.66492	0.0222143	3	183	2762.52	2884.45	2807.97	2818.31	3.44999	0.0218644	3	248	0.609639	-0.713974	DOWN
Q99961;M0QYE0;M0R0I3;Q99961-2;Q99961-3	5	1	31.7122	0.000932099	3.03054	0.000968762	1.63554	0.999984	CM55	PM54	41718.1	SH3GL1	Endophilin-A2 OS=Homo sapiens OX=9606 GN=SH3GL1 PE=1 SV=1	1512.92	1488.34	1287.2	1429.49	3.15518	0.0866274	3	532	894.53	836.033	891.484	874.016	2.94152	0.0376757	3	684	0.611419	-0.709767	DOWN
P10301	3	1	19.7066	0.000401692	3.39611	0.000592366	1.63442	1	CM55	PM54	23651.6	RRAS	Ras-related protein R-Ras OS=Homo sapiens OX=9606 GN=RRAS PE=1 SV=1	1128.26	997.047	981.174	1035.49	3.01515	0.0779635	3	655	625.749	631.528	643.391	633.556	2.80179	0.0141962	3	810	0.611839	-0.708776	DOWN
P06753	30	9	157.598	8.55809e-05	4.06762	0.000220027	1.62979	1	CM55	PM54	33007.1	TPM3	Tropomyosin alpha-3 chain OS=Homo sapiens OX=9606 GN=TPM3 PE=1 SV=2	9094.2	9525.87	8952.09	9190.72	3.96335	0.0325135	3	92	5759.12	5783.94	5374.59	5639.22	3.75122	0.0406988	3	135	0.613578	-0.704682	DOWN
Q14247;Q14247-3;Q14247-2;H0YCD9;H0YEV2	12	5	66.5455	0.00057824	3.23789	0.000721949	1.62807	1	CM55	PM54	61757.3	CTTN	Src substrate cortactin OS=Homo sapiens OX=9606 GN=CTTN PE=1 SV=2	2896.6	2585.53	2658.04	2713.39	3.43351	0.0599828	3	294	1568.44	1659.59	1771.85	1666.63	3.22184	0.0611345	3	416	0.614224	-0.703164	DOWN
P60174;P60174-1;P60174-4;U3KPZ0;U3KQF3;U3KPS5	39	30	161.052	0.000272118	3.56524	0.000443086	1.62561	1	CM55	PM54	31076.2	TPI1	Triosephosphate isomerase OS=Homo sapiens OX=9606 GN=TPI1 PE=1 SV=3	28235.8	27860.6	30708	28934.8	4.46142	0.0534666	3	21	17542	17137.1	18718.7	17799.3	4.2504	0.0461585	3	28	0.615152	-0.700985	DOWN
Q5T5P2;Q5T5P2-10;Q5T5P2-3;Q5T5P2-7;Q5T5P2-2;Q5T5P1;Q5T5P2-9	10	2	47.1617	0.00474019	2.3242	0.0030023	1.61983	0.984273	CM55	PM54	214743	KIAA1217	Sickle tail protein homolog OS=Homo sapiens OX=9606 GN=KIAA1217 PE=1 SV=2	796.831	920.561	873.207	863.533	2.93628	0.0722957	3	740	495.773	488.443	615.089	533.102	2.72681	0.133366	3	908	0.61735	-0.69584	DOWN
P26232;P26232-2;P26232-3;P26232-5;A0A0A0MRI5;A0A0A0MTJ6;P26232-4;P26232-6	8	1	45.1315	1.19165e-05	4.92385	0.000101236	1.60837	1	CM55	PM54	106112	CTNNA2	Catenin alpha-2 OS=Homo sapiens OX=9606 GN=CTNNA2 PE=1 SV=5	960.156	957.737	949.312	955.735	2.98034	0.00595594	3	693	583.983	583.422	615.27	594.225	2.77395	0.0306748	3	850	0.621747	-0.685601	DOWN
P08758;D6RBL5;D6RBE9;E9PHT9;D6RCN3	40	33	171.171	9.62226e-05	4.01672	0.000228376	1.60132	1	CM55	PM54	35993.9	ANXA5	Annexin A5 OS=Homo sapiens OX=9606 GN=ANXA5 PE=1 SV=2	36043	38303.8	38670.7	37672.5	4.57602	0.0377738	3	14	24468	23233.7	22875.9	23525.9	4.37155	0.0355062	3	23	0.624483	-0.679265	DOWN
P06396;A0A0A0MS51;A0A0A0MT01;P06396-2;P06396-3;P06396-4;A0A0U1RQL8;Q5T0I0	17	12	100.773	2.34952e-05	4.62902	0.00011491	1.60012	1	CM55	PM54	86096.8	GSN	Gelsolin OS=Homo sapiens OX=9606 GN=GSN PE=1 SV=1	10800.7	10517.8	10148.9	10489.1	4.02074	0.031163	3	85	6617.4	6632.28	6415.91	6555.2	3.81659	0.018437	3	110	0.624952	-0.678182	DOWN
H3BPE7;P35637;P35637-2	6	1	33.8136	0.00236659	2.62588	0.00181341	1.59427	0.998301	CM55	PM54	53725.1	FUS	RNA-binding protein FUS OS=Homo sapiens OX=9606 GN=FUS PE=1 SV=1	800.316	726.467	703.381	743.388	2.87122	0.0681131	3	799	519.905	442.415	436.539	466.286	2.66865	0.099785	3	992	0.627245	-0.6729	DOWN
P14618;P14618-3;B4DNK4;H3BQ34;H3BTJ2;H3BUW1;H3BT25;H3BU13;H3BN34;H3BQZ3;P30613-2	89	49	389.991	1.98752e-05	4.70169	0.000111097	1.59181	1	CM55	PM54	58507.3	PKM	Pyruvate kinase PKM OS=Homo sapiens OX=9606 GN=PKM PE=1 SV=4	70453.2	71440.9	73946.7	71946.9	4.85701	0.0250308	3	4	44002.7	45525.9	46066.3	45198.3	4.65512	0.0236758	3	6	0.628217	-0.670665	DOWN
P78417;P78417-3;Q5TA02;P78417-2;Q5TA01	7	4	33.8472	0.000236761	3.62569	0.000410195	1.59147	1	CM55	PM54	27851	GSTO1	Glutathione S-transferase omega-1 OS=Homo sapiens OX=9606 GN=GSTO1 PE=1 SV=2	1814.65	2032.66	1839.59	1895.63	3.27775	0.0629467	3	420	1202.43	1203.43	1167.51	1191.12	3.07596	0.0171711	3	543	0.62835	-0.670359	DOWN
Q14689;Q14689-5;Q14689-6;Q14689-2;Q14689-4	3	1	11.6859	0.000262426	3.58099	0.000430896	1.5907	1	CM55	PM54	172480	DIP2A	Disco-interacting protein 2 homolog A OS=Homo sapiens OX=9606 GN=DIP2A PE=1 SV=2	705.474	697.546	687.224	696.748	2.84308	0.013134	3	835	412.278	432.85	468.912	438.013	2.64149	0.0654491	3	1021	0.628654	-0.669663	DOWN
A6QL64;A0A087X1R3;A0A1W2PNQ7;A6QL64-3;A0A087WX87;A0A087X037;A0A1W2PS33;A6QL64-4;A6QL64-5;Q8N2N9-4	14	2	80.6343	0.0057108	2.2433	0.00343975	1.5895	0.975011	CM55	PM54	219290	ANKRD36	Ankyrin repeat domain-containing protein 36A OS=Homo sapiens OX=9606 GN=ANKRD36 PE=2 SV=3	2754.86	2783.93	2870.78	2803.19	3.44765	0.0215149	3	284	2020.43	1771.21	1499.07	1763.57	3.24639	0.147861	3	391	0.62913	-0.66857	DOWN
Q06210;Q06210-2	17	4	112.521	0.000114308	3.94192	0.000252376	1.58219	1	CM55	PM54	79605	GFPT1	Glutamine--fructose-6-phosphate aminotransferase [isomerizing] 1 OS=Homo sapiens OX=9606 GN=GFPT1 PE=1 SV=3	1339.97	1377.71	1268.69	1328.79	3.12346	0.0416656	3	555	869.967	817.179	832.372	839.839	2.9242	0.0323574	3	695	0.632034	-0.661926	DOWN
H3BLU7;O43488;Q8NHP1	4	1	22.9722	0.00118948	2.92464	0.00112279	1.58189	0.999932	CM55	PM54	35026.5	AKR7A2	Aflatoxin B1 aldehyde reductase member 2 (Fragment) OS=Homo sapiens OX=9606 GN=AKR7A2 PE=1 SV=1	1155.74	1037.29	1044.93	1079.32	3.03315	0.0614175	3	635	647.641	742.743	656.509	682.298	2.83397	0.0769965	3	783	0.632155	-0.661649	DOWN
Q9ULB4	2	1	8.3473	0.00291542	2.5353	0.00209819	1.57777	0.996364	CM55	PM54	89031.8	CDH9	Cadherin-9 OS=Homo sapiens OX=9606 GN=CDH9 PE=2 SV=2	1999.02	1946.45	1845.89	1930.45	3.28566	0.0403037	3	410	1142.17	1392.44	1135.98	1223.53	3.08761	0.119581	3	536	0.633805	-0.657889	DOWN
P07237;H7BZ94;H0Y3Z3;I3L312;I3L398;I3NI03;I3L0S0;I3L4M2;I3L3U6;I3L3P5;I3L514;I3L1Y5	46	33	291.45	5.57423e-05	4.25381	0.000181529	1.5771	1	CM55	PM54	57515.6	P4HB	Protein disulfide-isomerase OS=Homo sapiens OX=9606 GN=P4HB PE=1 SV=3	20739.7	22382	20836.3	21319.3	4.32877	0.0432256	3	32	13629.2	13380.7	13544.2	13518	4.13091	0.00934516	3	48	0.634075	-0.657275	DOWN
Q15029;Q15029-2;Q15029-3	5	1	25.912	0.00676139	2.16996	0.00392301	1.57206	0.963487	CM55	PM54	110405	EFTUD2	116 kDa U5 small nuclear ribonucleoprotein component OS=Homo sapiens OX=9606 GN=EFTUD2 PE=1 SV=1	295.213	358.593	301.02	318.276	2.5028	0.110083	3	1194	220.342	178.768	208.264	202.458	2.30633	0.105633	3	1388	0.636109	-0.652654	DOWN
Q92824;B1AMG5;Q92824-2	5	2	20.2205	0.00187156	2.7278	0.00151325	1.56188	0.999354	CM55	PM54	218120	PCSK5	Proprotein convertase subtilisin/kexin type 5 OS=Homo sapiens OX=9606 GN=PCSK5 PE=1 SV=4	1418.14	1224.5	1421.85	1354.83	3.13188	0.0833178	3	549	815.828	923.036	863.444	867.436	2.93824	0.0619244	3	688	0.640255	-0.643282	DOWN
Q8N7X0;H0Y334;Q8N7X0-2;H0Y333;E5RGD1	14	4	59.3764	0.000337405	3.47185	0.000517076	1.56032	1	CM55	PM54	190797	ADGB	Androglobin OS=Homo sapiens OX=9606 GN=ADGB PE=2 SV=3	1004.25	950.432	946.862	967.18	2.98551	0.0332413	3	686	592.89	662.292	604.401	619.861	2.79229	0.0600048	3	820	0.640895	-0.64184	DOWN
Q13740;Q13740-2;F5GXJ9;H7C543;Q13740-4;Q13740-3	10	5	62.0452	0.000622602	3.20579	0.000746338	1.55668	0.999999	CM55	PM54	65786.7	ALCAM	CD166 antigen OS=Homo sapiens OX=9606 GN=ALCAM PE=1 SV=2	2453.35	2345.9	2608.78	2469.34	3.39258	0.0535233	3	333	1605.98	1487.08	1665.82	1586.29	3.20038	0.0573535	3	433	0.642394	-0.638469	DOWN
A0A0A0MQR4;Q96RK0	3	2	15.0013	0.00279539	2.55356	0.00202673	1.55369	0.996859	CM55	PM54	164248	CIC	Protein capicua homolog OS=Homo sapiens OX=9606 GN=CIC PE=1 SV=1	1448.56	1484.17	1734.16	1555.63	3.19191	0.100045	3	496	937.91	1062.33	1003.51	1001.25	3.00054	0.0621611	3	620	0.643629	-0.6357	DOWN
Q15751;H0YNB1	10	3	44.8549	0.0143844	1.84211	0.00700906	1.5527	0.865349	CM55	PM54	539129	HERC1	Probable E3 ubiquitin-protein ligase HERC1 OS=Homo sapiens OX=9606 GN=HERC1 PE=1 SV=2	856.491	702.076	847.006	801.858	2.9041	0.107929	3	774	510.666	595.62	443.001	516.429	2.71301	0.14808	3	926	0.644041	-0.634776	DOWN
O43390;O43390-2;O43390-3;O43390-4;B4DT28	7	2	41.463	0.000241393	3.61728	0.000410195	1.54586	1	CM55	PM54	71228.3	HNRNPR	Heterogeneous nuclear ribonucleoprotein R OS=Homo sapiens OX=9606 GN=HNRNPR PE=1 SV=1	389.4	388.951	398.035	392.128	2.59343	0.0130566	3	1100	265.821	258.114	237.055	253.663	2.40426	0.0587025	3	1280	0.646888	-0.628411	DOWN
P02545;P02545-3;P02545-6;P02545-5;P02545-4;H0YAB0;A0A0C4DGC5	50	15	327.545	0.00207292	2.68342	0.00163652	1.54216	0.999	CM55	PM54	74424.7	LMNA	Prelamin-A/C OS=Homo sapiens OX=9606 GN=LMNA PE=1 SV=1	5207.79	5116.69	4312.06	4878.85	3.68832	0.10104	3	176	3127.27	3187.84	3175.82	3163.65	3.50019	0.0101367	3	221	0.648441	-0.624952	DOWN
Q5T670;Q7L590;Q7L590-2	3	2	17.3216	0.000142832	3.84518	0.000287973	1.54175	1	CM55	PM54	97320.4	MCM10	MCM10 minichromosome maintenance deficient 10 (S. cerevisiae)_ isoform CRA_b OS=Homo sapiens OX=9606 GN=MCM10 PE=1 SV=1	601.59	641.865	602.075	615.177	2.789	0.0375731	3	895	383.798	399.576	413.658	399.011	2.60098	0.0374383	3	1066	0.648612	-0.624573	DOWN
C9JDM3;C9JJ34;F6WQW2;P43487;P43487-2;C9JGV6;C9JIC6;C9JXG8	2	2	13.4431	0.00308124	2.51127	0.00216906	1.54065	0.995615	CM55	PM54	19044.6	RANBP1	Ran-specific GTPase-activating protein (Fragment) OS=Homo sapiens OX=9606 GN=RANBP1 PE=1 SV=8	1468.52	1603.93	1758.11	1610.18	3.20688	0.0899868	3	486	1096.49	957.387	1081.52	1045.13	3.01917	0.0730599	3	597	0.649076	-0.623541	DOWN
Q86SE9	2	1	8.7618	0.00737481	2.13225	0.00418287	1.53974	0.956237	CM55	PM54	30512.3	PCGF5	Polycomb group RING finger protein 5 OS=Homo sapiens OX=9606 GN=PCGF5 PE=1 SV=1	494.41	523.6	525.098	514.369	2.71128	0.0336366	3	978	389.713	291.945	320.532	334.063	2.52383	0.150478	3	1148	0.649462	-0.622683	DOWN
P08648;H0YIV7	9	5	45.3435	0.000586761	3.23154	0.000730255	1.52774	0.999999	CM55	PM54	115677	ITGA5	Integrin alpha-5 OS=Homo sapiens OX=9606 GN=ITGA5 PE=1 SV=2	733.522	756.253	679.69	723.155	2.85923	0.0543728	3	812	499.38	452.828	467.839	473.349	2.67518	0.0501956	3	976	0.654561	-0.611401	DOWN
Q8TF09;Q9NP97;B1AKR6;H3BNG9;H3BPA0;H3BQI1;Q7Z4M1;Q9NP97-2	2	1	11.634	0.00215336	2.66688	0.00167966	1.52608	0.998831	CM55	PM54	10911.7	DYNLRB2	Dynein light chain roadblock-type 2 OS=Homo sapiens OX=9606 GN=DYNLRB2 PE=1 SV=1	728.575	644.603	789.853	721.01	2.85794	0.101136	3	813	469.923	479.945	467.509	472.459	2.67436	0.0139579	3	977	0.655273	-0.609832	DOWN
P00441;H7BYH4	4	3	28.7674	1.60235e-05	4.79524	0.000107963	1.52496	1	CM55	PM54	16163.9	SOD1	Superoxide dismutase [Cu-Zn] OS=Homo sapiens OX=9606 GN=SOD1 PE=1 SV=2	8580.06	8574.04	8826.07	8660.06	3.93752	0.0166056	3	99	5668.3	5544.6	5823.69	5678.86	3.75426	0.0246259	3	133	0.655754	-0.608774	DOWN
P63010;P63010-2;P63010-3;A0A087X253;A0A087WU93;A0A087WZQ6;A0A087WYD1;K7EN71;K7ERB2	15	2	85.7615	6.71274e-06	5.1731	7.27912e-05	1.52418	1	CM55	PM54	105465	AP2B1	AP-2 complex subunit beta OS=Homo sapiens OX=9606 GN=AP2B1 PE=1 SV=1	1773.48	1776.15	1733.03	1760.89	3.24573	0.013721	3	442	1171.27	1164.81	1129.84	1155.31	3.0627	0.0192916	3	558	0.656092	-0.608029	DOWN
C9J066;E9PN67;Q8N4C6;Q8N4C6-10;Q8N4C6-2;Q8N4C6-4;Q8N4C6-5;Q8N4C6-7;Q8N4C6-9;H0YDJ4;H9KV85;Q8N4C6-11;Q8N4C6-6	15	3	64.1391	0.0353791	1.45125	0.0139092	1.52398	0.652577	CM55	PM54	240189	NIN	Ninein OS=Homo sapiens OX=9606 GN=NIN PE=1 SV=1	1490.32	1261.26	1030.12	1260.57	3.10057	0.182538	3	580	938.12	831.137	712.211	827.156	2.91759	0.136621	3	701	0.656176	-0.607844	DOWN
P31153;P31153-2	4	1	19.6687	0.0279306	1.55392	0.0116117	1.52377	0.715584	CM55	PM54	44002.9	MAT2A	S-adenosylmethionine synthase isoform type-2 OS=Homo sapiens OX=9606 GN=MAT2A PE=1 SV=1	738.832	560.323	768.406	689.187	2.83834	0.163345	3	841	500.466	465.602	390.806	452.291	2.65542	0.123878	3	1006	0.656268	-0.607643	DOWN
Q12907;D6RBV2;D6RIU4;D6RDX1	9	2	51.5938	0.0218674	1.6602	0.00963421	1.51925	0.776483	CM55	PM54	40570.9	LMAN2	Vesicular integral-membrane protein VIP36 OS=Homo sapiens OX=9606 GN=LMAN2 PE=1 SV=1	594.997	514.844	632.605	580.815	2.76404	0.103557	3	927	439.339	313.839	393.734	382.304	2.58241	0.166166	3	1088	0.65822	-0.603359	DOWN
Q14651;C9JAM8;C9J0F3;C9J359;C9JAM3;C9JU08;C9JVY2;C9JYI1	8	1	49.4021	7.40599e-05	4.13042	0.000201939	1.51686	1	CM55	PM54	70652.8	PLS1	Plastin-1 OS=Homo sapiens OX=9606 GN=PLS1 PE=1 SV=2	62.7672	65.9054	64.6335	64.4354	1.80912	0.0244965	3	1704	40.7656	43.2538	43.4192	42.4795	1.62818	0.0349955	3	1776	0.659258	-0.601085	DOWN
P48681	14	3	70.342	0.0014364	2.84272	0.00128264	1.51508	0.999815	CM55	PM54	177895	NES	Nestin OS=Homo sapiens OX=9606 GN=NES PE=1 SV=2	751.374	867.793	820.305	813.158	2.91017	0.0719881	3	766	506.719	566.884	536.53	536.711	2.72974	0.0560508	3	907	0.660033	-0.59939	DOWN
Q9HD45;Q5TB53	4	2	19.266	0.001675	2.77598	0.00142513	1.51421	0.999609	CM55	PM54	68629.8	TM9SF3	Transmembrane 9 superfamily member 3 OS=Homo sapiens OX=9606 GN=TM9SF3 PE=1 SV=2	685.739	721.947	720.58	709.422	2.8509	0.0289268	3	822	478.739	504.6	422.192	468.51	2.67072	0.0899561	3	988	0.660411	-0.598564	DOWN
O75718;C9JP16	5	1	34.4353	0.0426347	1.37024	0.0162499	1.51275	0.601189	CM55	PM54	47189.3	CRTAP	Cartilage-associated protein OS=Homo sapiens OX=9606 GN=CRTAP PE=1 SV=1	1364.85	987.703	1249.65	1200.73	3.07945	0.160961	3	598	899.61	840.515	641.105	793.744	2.89968	0.170648	3	722	0.661049	-0.59717	DOWN
Q8NC51;Q8NC51-2;Q8NC51-3;Q8NC51-4	3	1	16.3277	0.013262	1.87739	0.00659147	1.51167	0.879867	CM55	PM54	45022.5	SERBP1	Plasminogen activator inhibitor 1 RNA-binding protein OS=Homo sapiens OX=9606 GN=SERBP1 PE=1 SV=2	764.773	680.031	681.343	708.716	2.85047	0.0685068	3	825	390.753	484.24	531.494	468.829	2.67101	0.152774	3	986	0.661519	-0.596146	DOWN
P16615;P16615-2;P16615-3;P16615-5;P16615-4;H7C5W9;A0A0C4DH86;H3BTW4	15	3	91.5191	0.000544487	3.26401	0.000711638	1.50935	1	CM55	PM54	116411	ATP2A2	Sarcoplasmic/endoplasmic reticulum calcium ATPase 2 OS=Homo sapiens OX=9606 GN=ATP2A2 PE=1 SV=1	1695.26	1901.87	1735.33	1777.49	3.24981	0.0616422	3	437	1198.29	1129.52	1205.13	1177.65	3.07102	0.035509	3	552	0.662535	-0.59393	DOWN
P13645	2	1	10.0641	0.00166833	2.77772	0.00142351	1.50602	0.999616	CM55	PM54	59055.3	KRT10	Keratin_ type I cytoskeletal 10 OS=Homo sapiens OX=9606 GN=KRT10 PE=1 SV=6	1067.13	1009.22	1098.17	1058.17	3.02456	0.0426632	3	642	772.627	668.166	667.093	702.629	2.84673	0.0862795	3	773	0.664001	-0.590742	DOWN
Q9UBC2;M0R165;Q9UBC2-2;Q9UBC2-3;Q9UBC2-4;M0R2S2	5	1	21.8837	0.000596359	3.22449	0.000731632	1.49877	0.999999	CM55	PM54	94369.3	EPS15L1	Epidermal growth factor receptor substrate 15-like 1 OS=Homo sapiens OX=9606 GN=EPS15L1 PE=1 SV=1	3257.27	3122.77	3122.25	3167.43	3.50071	0.0245631	3	255	1956.13	2222.2	2161.74	2113.36	3.32497	0.0659975	3	326	0.667215	-0.583776	DOWN
F8VPD4;P27708	10	2	45.4422	0.000571213	3.2432	0.000717763	1.49825	1	CM55	PM54	238247	CAD	CAD protein OS=Homo sapiens OX=9606 GN=CAD PE=1 SV=1	5071.18	5362.19	5409.39	5280.92	3.72271	0.0346849	3	169	3727.67	3300.68	3545.84	3524.73	3.54713	0.0607925	3	204	0.667446	-0.583277	DOWN
P08670;B0YJC4;B0YJC5;A0A1B0GTT5;A0A1B0GVG8;A0A1W2PQU7;F8W835;Q16352;Q9HCD6;D6RG15;P07196;Q9HCD6-2;U3KPR1	192	107	880.195	2.56144e-06	5.59152	4.54993e-05	1.49523	1	CM55	PM54	53708.8	VIM	Vimentin OS=Homo sapiens OX=9606 GN=VIM PE=1 SV=4	138365	138910	138848	138708	5.1421	0.00215233	3	2	94217.3	93092.3	90990.2	92766.6	4.96739	0.0176572	3	2	0.668793	-0.580369	DOWN
P31948;P31948-2;P31948-3;F5H783;F5GXD8	5	1	38.6105	7.44114e-05	4.12836	0.000201939	1.49246	1	CM55	PM54	63266.7	STIP1	Stress-induced-phosphoprotein 1 OS=Homo sapiens OX=9606 GN=STIP1 PE=1 SV=1	1684.66	1745.3	1621.75	1683.9	3.22632	0.0366895	3	461	1108.11	1125.75	1150.94	1128.27	3.05241	0.0190793	3	567	0.670032	-0.577697	DOWN
P51571;A6NLM8	3	3	19.8958	5.21932e-05	4.28239	0.00017433	1.49145	1	CM55	PM54	19169.7	SSR4	Translocon-associated protein subunit delta OS=Homo sapiens OX=9606 GN=SSR4 PE=1 SV=1	1756.13	1685.43	1676.57	1706.04	3.23199	0.0255554	3	456	1112.73	1176.77	1142.14	1143.88	3.05838	0.0280255	3	562	0.670487	-0.57672	DOWN
A0A087WVD1;Q96B70	2	1	9.2385	0.00172778	2.76251	0.00143966	1.48856	0.999549	CM55	PM54	51337.3	LENG9	Leukocyte receptor cluster member 9 OS=Homo sapiens OX=9606 GN=LENG9 PE=1 SV=1	1089.41	1238.35	1272.53	1200.1	3.07922	0.0811354	3	599	778.234	798.954	841.448	806.212	2.90645	0.0399718	3	713	0.671789	-0.573919	DOWN
I3VM54;Q9Y2K7	2	1	7.7763	0.00565745	2.24738	0.00342531	1.48575	0.975559	CM55	PM54	133113	KDM2A	Lysine-specific demethylase 2A OS=Homo sapiens OX=9606 GN=KDM2A PE=1 SV=1	300.195	312.299	270.475	294.323	2.46882	0.0731224	3	1228	203.657	175.888	214.749	198.098	2.29688	0.101052	3	1402	0.673063	-0.571187	DOWN
Q9Y6V0;Q9Y6V0-6;Q9Y6V0-3	24	1	105.97	0.0223982	1.64979	0.00984589	1.48506	0.770763	CM55	PM54	562525	PCLO	Protein piccolo OS=Homo sapiens OX=9606 GN=PCLO PE=1 SV=5	368.271	274.849	333.83	325.65	2.51275	0.14508	3	1183	191.294	232.786	233.77	219.283	2.34101	0.110563	3	1358	0.673371	-0.570526	DOWN
Q8IVF4;A0A1C7CYW8;A0A0J9YY17;F5H515;A0A087WV07;A0A096LNK1;A0A0J9YWH2;H0YGZ2;Q8IVF4-2	32	4	132.249	0.00216748	2.66405	0.0016873	1.48437	0.9988	CM55	PM54	518035	DNAH10	Dynein heavy chain 10_ axonemal OS=Homo sapiens OX=9606 GN=DNAH10 PE=1 SV=4	800.079	839.924	939.532	859.845	2.93442	0.0835372	3	742	612.528	554.191	571.073	579.264	2.76288	0.0518222	3	865	0.673685	-0.569855	DOWN
P27824;P27824-2;P27824-3;D6RGY2;H0Y9Q7;D6RAU8;D6RB85;D6RDP7;D6RFL1;H0Y9H1;D6RAQ8;D6RD16;D6RHJ3	15	8	106.257	0.000425973	3.37062	0.000621141	1.48379	1	CM55	PM54	68024.6	CANX	Calnexin OS=Homo sapiens OX=9606 GN=CANX PE=1 SV=2	4059.32	3848.74	3841.01	3916.36	3.59288	0.0316286	3	219	2748.1	2694.61	2475.56	2639.42	3.42151	0.054713	3	261	0.673949	-0.569289	DOWN
Q8N1N4;Q8N1N4-2	7	1	43.077	0.000120447	3.91921	0.000255811	1.48224	1	CM55	PM54	57664.3	KRT78	Keratin_ type II cytoskeletal 78 OS=Homo sapiens OX=9606 GN=KRT78 PE=1 SV=2	1424.62	1476.71	1531.34	1477.56	3.16954	0.0361176	3	517	985.808	975.493	1029.22	996.84	2.99863	0.0286015	3	622	0.674654	-0.56778	DOWN
Q07021;I3L3B0;I3L3Q7	5	1	31.1903	0.0130839	1.88326	0.00652928	1.48202	0.882192	CM55	PM54	31761.5	C1QBP	Complement component 1 Q subcomponent-binding protein_ mitochondrial OS=Homo sapiens OX=9606 GN=C1QBP PE=1 SV=1	918.315	949.721	865.744	911.26	2.95964	0.0465629	3	713	705.626	517.257	621.744	614.876	2.78879	0.153482	3	824	0.674753	-0.567568	DOWN
P13667	15	11	97.0928	0.00372149	2.42928	0.00251178	1.48012	0.992027	CM55	PM54	73274.7	PDIA4	Protein disulfide-isomerase A4 OS=Homo sapiens OX=9606 GN=PDIA4 PE=1 SV=2	2978.68	2626.29	3172.01	2925.66	3.46622	0.0945758	3	280	1851.8	2054.88	2023.22	1976.63	3.29593	0.0552784	3	353	0.675619	-0.565718	DOWN
P62258;P62258-2;K7EM20;B4DJF2;I3L3T1;K7EIT4;I3L0W5	16	9	139.594	9.34504e-05	4.02942	0.000228376	1.47582	1	CM55	PM54	29345	YWHAE	14-3-3 protein epsilon OS=Homo sapiens OX=9606 GN=YWHAE PE=1 SV=1	11736.3	12325.4	12295.5	12119.1	4.08347	0.0273797	3	74	8439.41	7920.34	8275.65	8211.8	3.91444	0.032314	3	84	0.677591	-0.561513	DOWN
P15924;P15924-2;P15924-3	14	2	63.2046	0.00820327	2.08601	0.00450879	1.47236	0.946014	CM55	PM54	334227	DSP	Desmoplakin OS=Homo sapiens OX=9606 GN=DSP PE=1 SV=3	3343.26	3011.31	2968.24	3107.6	3.49243	0.0660375	3	258	2009.18	2412.21	1910.49	2110.63	3.32441	0.125934	3	327	0.679182	-0.558129	DOWN
P09496-2;P09496;P09496-3;P09496-4;P09496-5;C9J8P9;F8WF69	4	2	25.4216	0.00751532	2.12405	0.00423492	1.47082	0.954535	CM55	PM54	23719	CLTA	Isoform Non-brain of Clathrin light chain A OS=Homo sapiens OX=9606 GN=CLTA	3909.05	3278.47	3388.07	3525.2	3.54718	0.0955723	3	236	2237.54	2666.7	2286.01	2396.75	3.37962	0.0980649	3	286	0.679892	-0.556623	DOWN
A0A075B7D9;Q92804;Q92804-2;A0A075B7F4	4	1	21.6395	0.00206201	2.68571	0.00163652	1.46601	0.999022	CM55	PM54	49181.8	TAF15	TATA-binding protein-associated factor 2N OS=Homo sapiens OX=9606 GN=TAF15 PE=1 SV=1	378.628	336.731	393.525	369.628	2.56777	0.0796672	3	1121	252.781	240.535	263.083	252.133	2.40163	0.0447698	3	1282	0.682126	-0.551891	DOWN
P24534;C9JZW3;F2Z2G2;F8WF65	6	6	48.676	7.94948e-05	4.09966	0.000209904	1.46372	1	CM55	PM54	24934.8	EEF1B2	Elongation factor 1-beta OS=Homo sapiens OX=9606 GN=EEF1B2 PE=1 SV=3	15074.6	15078.1	15291.1	15147.9	4.18035	0.00818742	3	54	10250.7	9998.06	10797.9	10348.9	4.01489	0.0395096	3	67	0.683191	-0.54964	DOWN
Q9H8Y8;Q9H8Y8-2;Q9H8Y8-3	4	2	20.8357	0.00883359	2.05386	0.00474186	1.46369	0.937996	CM55	PM54	47316.5	GORASP2	Golgi reassembly-stacking protein 2 OS=Homo sapiens OX=9606 GN=GORASP2 PE=1 SV=3	625.64	748.354	776.523	716.839	2.85542	0.111917	3	816	527.442	454.652	487.147	489.747	2.68997	0.0744564	3	949	0.683204	-0.549612	DOWN
P46977;P46977-2;A0A0C4DH80;E9PI32;E9PN73	4	4	18.8381	0.000756208	3.12136	0.00083954	1.4626	0.999996	CM55	PM54	81157.1	STT3A	Dolichyl-diphosphooligosaccharide--protein glycosyltransferase subunit STT3A OS=Homo sapiens OX=9606 GN=STT3A PE=1 SV=2	911.001	880.129	801.391	864.174	2.9366	0.0654036	3	738	587.796	577.81	606.943	590.85	2.77148	0.0250561	3	853	0.683716	-0.54853	DOWN
P07339;A0A1B0GV23;A0A1B0GVD5;A0A1B0GVP3;A0A1B0GW44;A0A1B0GWE8;A0A1B0GU03;A0A1B0GU92;C9JH19;F8WD96;H7C469;F8W787;H7C1V0;A0A1B0GV01	9	6	53.119	0.000560289	3.25159	0.000715592	1.46232	1	CM55	PM54	45065.5	CTSD	Cathepsin D OS=Homo sapiens OX=9606 GN=CTSD PE=1 SV=1	1966.65	2099.6	1949.95	2005.4	3.3022	0.0408936	3	393	1444.71	1302.27	1367.16	1371.38	3.13716	0.0520004	3	484	0.683844	-0.54826	DOWN
P50454;E9PPV6;E9PR70;E9PK86;E9PKH2;E9PMI5;E9PNX1;E9PIG2;E9PJH8;E9PRS3;E9PQ34;E9PLA6;H0YEP8	25	17	193.878	5.09791e-05	4.29261	0.000171742	1.46159	1	CM55	PM54	46554.7	SERPINH1	Serpin H1 OS=Homo sapiens OX=9606 GN=SERPINH1 PE=1 SV=2	15170.2	15252	15270.9	15231.1	4.18273	0.00351354	3	53	10491.4	10022.5	10748.9	10420.9	4.01791	0.0353401	3	66	0.684189	-0.547534	DOWN
P31943;E9PCY7;G8JLB6;H0YB39;D6RBM0;E5RGV0;E7EN40;D6RIU0;H0YBD7;H0YBG7;D6R9D3;D6R9T0;D6RAM1;D6RDL0;D6RDU3;D6RF17;D6RFM3;D6RIH9;D6RIT2;D6RJ04;E7EQJ0	7	1	42.1301	0.000766584	3.11544	0.000848649	1.46102	0.999996	CM55	PM54	49514.7	HNRNPH1	Heterogeneous nuclear ribonucleoprotein H OS=Homo sapiens OX=9606 GN=HNRNPH1 PE=1 SV=4	4948.72	4796.63	4798.48	4847.94	3.68556	0.0180031	3	178	3426.59	3059.62	3468.33	3318.18	3.5209	0.0677751	3	216	0.684451	-0.546981	DOWN
Q9P2D7;Q9P2D7-8;Q9P2D7-6	28	4	119.853	0.000431683	3.36484	0.000624021	1.4579	1	CM55	PM54	491471	DNAH1	Dynein heavy chain 1_ axonemal OS=Homo sapiens OX=9606 GN=DNAH1 PE=1 SV=5	2444.8	2196.81	2425.99	2355.87	3.37215	0.0586045	3	344	1636.95	1611.79	1599.06	1615.93	3.20842	0.0119316	3	423	0.685918	-0.543893	DOWN
G3V295;G3V5Z7;P60900;G3V3I1;P60900-2;G3V3U4;P60900-3	10	3	63.4599	0.00141447	2.84941	0.00128264	1.45563	0.999829	CM55	PM54	23241.3	PSMA6	Proteasome subunit alpha type OS=Homo sapiens OX=9606 GN=PSMA6 PE=1 SV=1	1430.33	1264.47	1459.14	1384.64	3.14134	0.0758824	3	542	921.862	960.064	971.783	951.236	2.97829	0.0274433	3	639	0.686989	-0.54164	DOWN
H0Y599;Q8N1I0;Q8N1I0-2;Q8N1I0-3;H0Y7H7;C9J637;C9J7D9;C9JDB3;F8WES4	12	1	69.2721	0.0192414	1.71576	0.00875359	1.45524	0.805932	CM55	PM54	230405	DOCK4	Dedicator of cytokinesis protein 4 (Fragment) OS=Homo sapiens OX=9606 GN=DOCK4 PE=1 SV=1	1371.8	1621.13	1862.63	1618.52	3.20912	0.151634	3	480	1184.11	1122.72	1029.78	1112.2	3.04618	0.0698594	3	573	0.687173	-0.541255	DOWN
Q5UIP0;Q5UIP0-2;H7BZN3;H7C2B5	7	2	29.9626	0.00117117	2.93138	0.00111088	1.45325	0.999938	CM55	PM54	276633	RIF1	Telomere-associated protein RIF1 OS=Homo sapiens OX=9606 GN=RIF1 PE=1 SV=2	1891.2	1916.77	1754.66	1854.21	3.26816	0.0470043	3	427	1317.73	1185.77	1324.2	1275.9	3.10582	0.0612295	3	518	0.688111	-0.539287	DOWN
Q9NZZ3;Q9NZZ3-2	2	1	12.0808	0.00255197	2.59312	0.0019105	1.45314	0.99774	CM55	PM54	24627.8	CHMP5	Charged multivesicular body protein 5 OS=Homo sapiens OX=9606 GN=CHMP5 PE=1 SV=1	976.826	927.168	818.392	907.462	2.95783	0.0892981	3	717	606.071	624.117	643.263	624.484	2.79552	0.0297825	3	818	0.688165	-0.539173	DOWN
A0A0A0MSG2;J3KNW4;Q14192	9	4	62.0928	0.00184777	2.73335	0.00150435	1.45086	0.999389	PM54	CM55	47062.6	FHL2	Four and a half LIM domains protein 2 OS=Homo sapiens OX=9606 GN=FHL2 PE=1 SV=1	1388.92	1237.57	1189.48	1271.99	3.10448	0.0818252	3	576	1817.99	1922.82	1795.64	1845.48	3.26611	0.0367933	3	373	1.45086	0.536911	UP
Q3L8U1;Q3L8U1-2;Q3L8U1-3;H3BTW3;H3BRU9;H3BSP3	18	1	75.3453	0.0010131	2.99435	0.00100998	1.46434	0.999974	PM54	CM55	328189	CHD9	Chromodomain-helicase-DNA-binding protein 9 OS=Homo sapiens OX=9606 GN=CHD9 PE=1 SV=2	122.821	133.656	133.407	129.961	2.11381	0.0475898	3	1541	179.505	202.271	189.145	190.307	2.27946	0.0600456	3	1420	1.46434	0.550249	UP
Q93045;E5RGX5;Q93045-2	5	1	34.4147	0.0069035	2.16093	0.00396738	1.46835	0.961836	PM54	CM55	20942.2	STMN2	Stathmin-2 OS=Homo sapiens OX=9606 GN=STMN2 PE=1 SV=3	324.595	409.158	342.899	358.884	2.55495	0.123968	3	1134	547.717	536.365	496.82	526.967	2.72178	0.0507014	3	915	1.46835	0.554197	UP
P08195;F5GZS6;J3KPF3;P08195-2;P08195-3;P08195-4;F5GZI0;F5H0E2	5	1	24.8379	0.00108864	2.96312	0.00106092	1.48437	0.999959	PM54	CM55	68222.2	SLC3A2	4F2 cell-surface antigen heavy chain OS=Homo sapiens OX=9606 GN=SLC3A2 PE=1 SV=3	331.966	339.177	342.418	337.854	2.52873	0.0158356	3	1158	519.721	456.9	527.877	501.499	2.70027	0.0774462	3	936	1.48437	0.569849	UP
P11586;F5H2F4;V9GYY3	15	2	78.2626	0.00293163	2.53289	0.00210569	1.48457	0.996294	PM54	CM55	102244	MTHFD1	C-1-tetrahydrofolate synthase_ cytoplasmic OS=Homo sapiens OX=9606 GN=MTHFD1 PE=1 SV=3	508.644	467.951	425.812	467.469	2.66975	0.0886011	3	1022	706.201	726.091	649.682	693.991	2.84135	0.0571199	3	778	1.48457	0.570046	UP
P53675;P53675-2;A0A087WX41;F5H5N6	26	4	147.503	0.019751	1.70441	0.0089438	1.48514	0.800065	PM54	CM55	189140	CLTCL1	Clathrin heavy chain 2 OS=Homo sapiens OX=9606 GN=CLTCL1 PE=1 SV=2	213.757	178.999	156.05	182.935	2.2623	0.158823	3	1433	278.973	243.36	292.721	271.684	2.43406	0.0937659	3	1243	1.48514	0.570599	UP
Q01538;Q01538-2;A0A0G2JS52;Q6P6D5	8	1	32.5756	0.00528984	2.27656	0.00328129	1.49134	0.979219	PM54	CM55	123983	MYT1	Myelin transcription factor 1 OS=Homo sapiens OX=9606 GN=MYT1 PE=1 SV=2	967.599	936.967	966.329	956.965	2.9809	0.01811	3	692	1497.87	1549.46	1234.14	1427.16	3.15447	0.118511	3	466	1.49134	0.576606	UP
P47897;P47897-2;A0A1B0GVU9;B4DDN1;A0A0U1RQT0;A0A0U1RQM8;A0A0U1RQU2;C9J165;F2Z2V6;A0A0U1RQQ5;A0A0U1RQX5;A0A0U1RQX9;A0A1B0GTT3;H7C0R3	9	4	51.1557	0.0228091	1.64189	0.00998103	1.50902	0.766389	PM54	CM55	88711.3	QARS	Glutamine--tRNA ligase OS=Homo sapiens OX=9606 GN=QARS PE=1 SV=1	343.501	454.935	506.005	434.814	2.6383	0.191115	3	1057	626.592	675.355	666.488	656.145	2.817	0.0395872	3	801	1.50902	0.593617	UP
Q9H9B4;D6RDG7;D6RFI0;S4R2X2;D6RAE9;H0Y9J5	6	1	33.2485	0.0144224	1.84096	0.00701013	1.51258	0.864861	PM54	CM55	35904.6	SFXN1	Sideroflexin-1 OS=Homo sapiens OX=9606 GN=SFXN1 PE=1 SV=4	352.463	336.146	397.209	361.939	2.55864	0.0873489	3	1129	606.91	576.186	459.294	547.464	2.73836	0.142269	3	893	1.51258	0.597015	UP
Q96N66;Q96N66-2;Q96N66-3	2	2	12.2659	0.00170796	2.76752	0.00143231	1.51618	0.999572	PM54	CM55	53449.4	MBOAT7	Lysophospholipid acyltransferase 7 OS=Homo sapiens OX=9606 GN=MBOAT7 PE=1 SV=2	720.185	831.883	705.834	752.634	2.87658	0.0916859	3	793	1140.53	1099.4	1183.45	1141.13	3.05733	0.0368313	3	564	1.51618	0.600439	UP
Q15293;Q15293-2;E9PP27	7	4	42.165	0.00274972	2.56071	0.00200274	1.52636	0.997037	PM54	CM55	38890	RCN1	Reticulocalbin-1 OS=Homo sapiens OX=9606 GN=RCN1 PE=1 SV=1	752.8	741.367	615.593	703.253	2.84711	0.108256	3	829	1081.45	1073.14	1065.65	1073.42	3.03077	0.0073635	3	587	1.52636	0.610092	UP
P33176	20	5	110.771	0.0100928	1.99599	0.00530841	1.53696	0.921599	PM54	CM55	110426	KIF5B	Kinesin-1 heavy chain OS=Homo sapiens OX=9606 GN=KIF5B PE=1 SV=1	397.529	447.704	545.863	463.699	2.66624	0.162711	3	1026	680.561	722.928	734.574	712.688	2.8529	0.0398845	3	761	1.53696	0.620082	UP
H0YCK3;P55265;P55265-2;P55265-3;P55265-4;P55265-5	4	1	16.8091	0.0031028	2.50825	0.00216906	1.53805	0.995512	PM54	CM55	133845	ADAR	Double-stranded RNA-specific adenosine deaminase (Fragment) OS=Homo sapiens OX=9606 GN=ADAR PE=1 SV=1	1010.64	835.154	871.151	905.647	2.95696	0.102343	3	720	1479.54	1308.45	1390.81	1392.93	3.14393	0.0614309	3	476	1.53805	0.621106	UP
P80723;P80723-2	5	3	31.0814	0.000562161	3.25014	0.000715592	1.54351	1	PM54	CM55	22693.4	BASP1	Brain acid soluble protein 1 OS=Homo sapiens OX=9606 GN=BASP1 PE=1 SV=2	1889.25	1711.54	1735.48	1778.76	3.25012	0.0542164	3	436	2598.05	2887.38	2751.14	2745.52	3.43863	0.0527216	3	254	1.54351	0.626214	UP
O75534;O75534-2;O75534-3;O75534-4;E9PLT0;E9PLD4;E9PKN4	6	3	32.52	0.0156384	1.80581	0.00743468	1.5479	0.849435	PM54	CM55	89740.2	CSDE1	Cold shock domain-containing protein E1 OS=Homo sapiens OX=9606 GN=CSDE1 PE=1 SV=2	245.19	179.33	244.895	223.138	2.34857	0.170026	3	1348	332.064	332.707	371.415	345.395	2.53832	0.0652474	3	1133	1.5479	0.630309	UP
P54886;P54886-2	10	5	46.8174	0.0194834	1.71033	0.00884312	1.55288	0.803136	PM54	CM55	88043.8	ALDH18A1	Delta-1-pyrroline-5-carboxylate synthase OS=Homo sapiens OX=9606 GN=ALDH18A1 PE=1 SV=2	294.41	263.495	375.78	311.228	2.49308	0.186362	3	1205	502.115	431.617	516.172	483.301	2.68422	0.0937476	3	962	1.55288	0.63495	UP
P61106;X6RFL8	8	2	65.8971	0.000373139	3.42813	0.000563008	1.55636	1	PM54	CM55	24125.1	RAB14	Ras-related protein Rab-14 OS=Homo sapiens OX=9606 GN=RAB14 PE=1 SV=4	178.505	189.281	185.417	184.401	2.26576	0.029605	3	1427	270.511	284.442	306.028	286.994	2.45787	0.0623558	3	1220	1.55636	0.638174	UP
P13987;A0A2U3TZL5;E9PNW4;E9PR17;H0YET2	11	11	32.0967	0.000926893	3.03297	0.000965921	1.56102	0.999985	PM54	CM55	14804.6	CD59	CD59 glycoprotein OS=Homo sapiens OX=9606 GN=CD59 PE=1 SV=1	3608.53	3915.88	3442.6	3655.67	3.56297	0.0656875	3	228	5366.5	5715.82	6037.38	5706.56	3.75637	0.058798	3	130	1.56102	0.642486	UP
Q14203;E7EX90;Q14203-3;Q14203-4;Q14203-6;Q14203-2;Q14203-5;Q6AWB1;E7EWF7	12	5	58.774	0.0202157	1.69431	0.009091	1.56132	0.79478	PM54	CM55	142436	DCTN1	Dynactin subunit 1 OS=Homo sapiens OX=9606 GN=DCTN1 PE=1 SV=3	411.344	388.694	281.556	360.531	2.55694	0.192288	3	1132	595.339	562.375	531.002	562.905	2.75044	0.0571536	3	877	1.56132	0.642767	UP
Q9P2J5;Q9P2J5-2;Q9P2J5-3;A0A087WXY1	13	3	62.6033	0.00413023	2.38403	0.00271269	1.5615	0.989194	PM54	CM55	135664	LARS	Leucine--tRNA ligase_ cytoplasmic OS=Homo sapiens OX=9606 GN=LARS PE=1 SV=2	147.602	144.831	131.627	141.353	2.15031	0.0603894	3	1518	220.636	195.609	245.923	220.723	2.34385	0.113976	3	1354	1.5615	0.64293	UP
Q969V3;Q969V3-2;K7EMW4;A0A0C4DGP7;K7ELZ9;K7EN96;K7ENM2	4	1	18.5568	0.0269555	1.56935	0.0113499	1.5665	0.724746	PM54	CM55	63145.6	NCLN	Nicalin OS=Homo sapiens OX=9606 GN=NCLN PE=1 SV=2	193.875	307.684	260.588	254.049	2.40492	0.225096	3	1293	381.897	405.07	406.938	397.968	2.59985	0.035051	3	1068	1.5665	0.647546	UP
Q15046;Q15046-2	3	1	15.2562	0.000675404	3.17044	0.000787883	1.57651	0.999998	PM54	CM55	68504.4	KARS	Lysine--tRNA ligase OS=Homo sapiens OX=9606 GN=KARS PE=1 SV=3	1530.99	1638	1660.82	1609.94	3.20681	0.0430558	3	487	2400.03	2471.74	2742.44	2538.07	3.4045	0.0711499	3	269	1.57651	0.65673	UP
C9IZG4;O60888;O60888-2;O60888-3;C9IZQ5	2	1	13.7064	0.00423919	2.37272	0.00274731	1.58195	0.988374	PM54	CM55	14685.8	CUTA	Protein CutA OS=Homo sapiens OX=9606 GN=CUTA PE=1 SV=1	846.741	979.541	898.156	908.146	2.95816	0.0737337	3	716	1494.54	1557.41	1257.97	1436.64	3.15735	0.109906	3	460	1.58195	0.661701	UP
A0A087WZC3;Q15431;Q5VXJ5	3	1	11.055	0.00867229	2.06187	0.00470296	1.60214	0.940063	PM54	CM55	111868	SYCP1	Synaptonemal complex protein 1 OS=Homo sapiens OX=9606 GN=SYCP1 PE=1 SV=1	623.456	838.348	833.493	765.099	2.88372	0.160359	3	785	1200.48	1197.87	1279.04	1225.8	3.08842	0.0376319	3	535	1.60214	0.680004	UP
Q8NEZ3;D6R9P6;Q8NEZ3-2	7	1	33.6501	0.0169629	1.7705	0.00791988	1.60337	0.833039	PM54	CM55	153520	WDR19	WD repeat-containing protein 19 OS=Homo sapiens OX=9606 GN=WDR19 PE=1 SV=2	223.519	272.227	319.301	271.682	2.43406	0.176284	3	1251	493.121	406.198	407.505	435.608	2.6391	0.114351	3	1027	1.60337	0.681111	UP
D6RF86;P55285;P55285-2	5	1	20.5953	0.0300187	1.52261	0.0121691	1.61348	0.696716	PM54	CM55	67802	CDH6	Cadherin-6 OS=Homo sapiens OX=9606 GN=CDH6 PE=1 SV=1	818.295	779.463	588.812	728.857	2.86264	0.168519	3	805	1339.28	953.146	1235.56	1175.99	3.07041	0.169931	3	553	1.61348	0.690174	UP
P28482;P28482-2;B3KR49;E9PBK7;E9PJF0;E9PQW4;H0YDH9;P27361;P27361-2;P27361-3	5	2	23.6913	0.000143755	3.84238	0.000287973	1.61771	1	PM54	CM55	41789	MAPK1	Mitogen-activated protein kinase 1 OS=Homo sapiens OX=9606 GN=MAPK1 PE=1 SV=3	546.42	541.211	558.643	548.758	2.73938	0.0163059	3	951	832.73	928.417	902.04	887.729	2.94828	0.0556734	3	674	1.61771	0.693949	UP
Q15018	3	1	14.872	0.000721973	3.14148	0.000822564	1.62493	0.999997	PM54	CM55	47129	ABRAXAS2	BRISC complex subunit Abraxas 2 OS=Homo sapiens OX=9606 GN=ABRAXAS2 PE=1 SV=2	832.45	945.656	923.883	900.663	2.95456	0.0666942	3	724	1509.71	1366.01	1514.83	1463.52	3.1654	0.057727	3	457	1.62493	0.700379	UP
P04181;P04181-2;Q96K76-3	6	2	32.7919	0.000254377	3.59452	0.000423012	1.6391	1	PM54	CM55	48877.1	OAT	Ornithine aminotransferase_ mitochondrial OS=Homo sapiens OX=9606 GN=OAT PE=1 SV=1	900.075	849.41	953.782	901.089	2.95477	0.0579225	3	723	1539.09	1424.22	1467.61	1476.97	3.16937	0.0392698	3	454	1.6391	0.712902	UP
Q15149;Q15149-2;Q15149-4;Q15149-5;Q15149-6;Q15149-7;Q15149-8;Q15149-9;E9PMV1;H0YDN1;E9PKG0;E9PIA2;E9PQ28	167	24	1080.95	1.54062e-05	4.8123	0.000106949	1.64526	1	PM54	CM55	533787	PLEC	Plectin OS=Homo sapiens OX=9606 GN=PLEC PE=1 SV=3	933.429	901.601	934.079	923.036	2.96522	0.0201141	3	711	1476.43	1561.69	1517.8	1518.64	3.18145	0.0280769	3	445	1.64526	0.718318	UP
Q9Y4K0;H0YAP6	4	2	17.8279	0.0258873	1.58691	0.0109604	1.65543	0.735051	PM54	CM55	88834.9	LOXL2	Lysyl oxidase homolog 2 OS=Homo sapiens OX=9606 GN=LOXL2 PE=1 SV=1	113.627	78.2551	84.5169	92.133	1.96442	0.204875	3	1638	151.259	128.587	177.714	152.52	2.18333	0.161212	3	1509	1.65543	0.727208	UP
O00410;O00410-3;H0Y8C6;O00410-2;E7EQT5;E7ETV3;E7EV12;C9JMV5;C9JZ53;E7EWK4;E7EX05;H0Y3V4;C9J875;C9JQT6;C9JXE0;C9JZD8;E7ESA1;E7ESZ1;E7ETV8	17	8	120.317	0.0228271	1.64155	0.00998103	1.66145	0.766198	PM54	CM55	125113	IPO5	Importin-5 OS=Homo sapiens OX=9606 GN=IPO5 PE=1 SV=4	711.99	457.433	705.593	625.005	2.79588	0.23225	3	888	1046.74	1059.1	1009.4	1038.42	3.01637	0.0249181	3	602	1.66145	0.732442	UP
P05141;V9GYG0	12	3	63.3804	0.00065259	3.18536	0.000777517	1.66146	0.999999	PM54	CM55	33080.4	SLC25A5	ADP/ATP translocase 2 OS=Homo sapiens OX=9606 GN=SLC25A5 PE=1 SV=7	503.382	527.437	467.833	499.551	2.69858	0.0600271	3	992	767.168	848.485	874.298	829.984	2.91907	0.0673632	3	700	1.66146	0.732451	UP
P05455;E7ERC4;E9PFL9;E9PGX9	6	1	40.5148	0.0146882	1.83303	0.00708245	1.6635	0.86146	PM54	CM55	47008.2	SSB	Lupus La protein OS=Homo sapiens OX=9606 GN=SSB PE=1 SV=2	603.605	675.573	556.016	611.732	2.78656	0.0983951	3	899	1246.54	914.505	891.8	1017.62	3.00758	0.195145	3	612	1.6635	0.734223	UP
O95071;E7EMW7;O95071-2;E5RFK7	18	3	79.2266	0.0401079	1.39677	0.0154574	1.67106	0.618115	PM54	CM55	312546	UBR5	E3 ubiquitin-protein ligase UBR5 OS=Homo sapiens OX=9606 GN=UBR5 PE=1 SV=2	143.401	263.627	215.995	207.674	2.31738	0.291531	3	1376	364.73	331.001	345.379	347.036	2.54038	0.0487719	3	1130	1.67106	0.740766	UP
Q13464;A0A0U1RQV4	17	1	75.6497	0.0348845	1.45737	0.0137702	1.67768	0.65641	PM54	CM55	159201	ROCK1	Rho-associated protein kinase 1 OS=Homo sapiens OX=9606 GN=ROCK1 PE=1 SV=1	190.488	179.866	134.352	168.236	2.22592	0.177254	3	1472	301.971	218.376	326.389	282.245	2.45063	0.200691	3	1227	1.67768	0.746468	UP
O60518;A0A096LPA6;A0A096LNS2	10	2	54.6523	0.0198481	1.70228	0.00896697	1.68999	0.798956	PM54	CM55	126254	RANBP6	Ran-binding protein 6 OS=Homo sapiens OX=9606 GN=RANBP6 PE=1 SV=2	115.943	138.276	108.842	121.021	2.08286	0.126921	3	1558	227.288	159.577	226.708	204.524	2.31074	0.190325	3	1385	1.68999	0.757019	UP
J3KQ32;Q9NTK5;Q9NTK5-3;C9JTK6;Q9NTK5-2	3	1	15.9736	0.00270621	2.56764	0.00198789	1.69038	0.997201	PM54	CM55	47166.2	OLA1	Obg-like ATPase 1 OS=Homo sapiens OX=9606 GN=OLA1 PE=1 SV=1	786.438	942.198	780.143	836.26	2.92234	0.109774	3	753	1454.62	1277.87	1508.29	1413.59	3.15032	0.0852882	3	471	1.69038	0.757346	UP
P62861;E9PR30	3	3	7.3481	0.000154592	3.81081	0.000300563	1.70078	1	PM54	CM55	6647.87	FAU	40S ribosomal protein S30 OS=Homo sapiens OX=9606 GN=FAU PE=1 SV=1	833.548	810.804	868.66	837.67	2.92307	0.0347958	3	752	1498.36	1340.43	1435.31	1424.7	3.15372	0.0558004	3	467	1.70078	0.766201	UP
P15531;P15531-2;E7ERL0;E5RHP0;C9K028;D6RJC3;E9PG59;E9PHC0	13	4	56.8658	0.00321971	2.49218	0.00222695	1.70173	0.994931	PM54	CM55	17319.8	NME1	Nucleoside diphosphate kinase A OS=Homo sapiens OX=9606 GN=NME1 PE=1 SV=1	530.046	648.533	661.768	613.449	2.78778	0.118236	3	897	1096.85	949.744	1085.18	1043.92	3.01867	0.0783302	3	600	1.70173	0.767002	UP
Q02878;F8VZ45;U3KQR5;F8VR69;F8VU16;F8VWR1;F8VZA3	5	2	26.7789	0.00309203	2.50976	0.00216906	1.71944	0.995563	PM54	CM55	32785	RPL6	60S ribosomal protein L6 OS=Homo sapiens OX=9606 GN=RPL6 PE=1 SV=3	368.111	309.265	394.4	357.259	2.55298	0.12202	3	1136	592.561	579.67	670.623	614.285	2.78837	0.0801167	3	825	1.71944	0.781938	UP
Q8TER5;Q8TER5-3;Q8TER5-4;Q8TER5-2	3	1	11.8602	0.00827532	2.08222	0.00454201	1.72889	0.945107	PM54	CM55	166369	ARHGEF40	Rho guanine nucleotide exchange factor 40 OS=Homo sapiens OX=9606 GN=ARHGEF40 PE=1 SV=3	203.108	202.275	227.652	211.012	2.32431	0.0683239	3	1369	394.717	406.188	293.542	364.816	2.56207	0.169923	3	1107	1.72889	0.789845	UP
A0A2R8YCS7;A0A2R8YD90;Q9Y3Z3;Q9Y3Z3-4;A0A2R8Y5D2;A0A2R8YF51;Q9Y3Z3-3;A0A2R8Y586;A0A2R8Y755;A0A2R8Y7R5;A0A2R8YG48	3	1	16.2283	0.00629248	2.20118	0.00372581	1.73364	0.968789	PM54	CM55	68684.1	SAMHD1	Deoxynucleoside triphosphate triphosphohydrolase SAMHD1 OS=Homo sapiens OX=9606 GN=SAMHD1 PE=1 SV=1	101.658	92.2351	92.6464	95.5131	1.98006	0.0557552	3	1630	150.743	146.651	199.362	165.585	2.21902	0.177087	3	1472	1.73364	0.793803	UP
Q13509;A0A0B4J269;Q13509-2;G3V2A3;G3V2N6;G3V2R8;G3V3R4;G3V5W4	23	2	232.955	0.0002478	3.6059	0.000419211	1.74225	1	PM54	CM55	50889	TUBB3	Tubulin beta-3 chain OS=Homo sapiens OX=9606 GN=TUBB3 PE=1 SV=2	244.691	241.738	230.04	238.823	2.37808	0.0324449	3	1312	422.622	384.413	441.236	416.09	2.61919	0.0696232	3	1042	1.74225	0.800955	UP
P14868;P14868-2;H7BZ35;H7C278;C9J7S3;C9JLC1	7	2	41.0845	0.00409788	2.38744	0.00269598	1.7728	0.989433	PM54	CM55	57535.5	DARS	Aspartate--tRNA ligase_ cytoplasmic OS=Homo sapiens OX=9606 GN=DARS PE=1 SV=2	1135.39	1288.64	1535.13	1319.72	3.12048	0.152816	3	557	2175.42	2529.96	2313.42	2339.6	3.36914	0.0763869	3	294	1.7728	0.82603	UP
Q13177;H7C1X3;B3KNX7;E9PM17;H0YCG5;Q13153;Q13153-2	3	1	15.1905	0.0213983	1.66962	0.00952369	1.77381	0.781602	PM54	CM55	58327.9	PAK2	Serine/threonine-protein kinase PAK 2 OS=Homo sapiens OX=9606 GN=PAK2 PE=1 SV=3	1073.26	1708.75	1432.15	1404.72	3.14759	0.226829	3	536	2554.31	2113.27	2807.53	2491.7	3.3965	0.141005	3	275	1.77381	0.826851	UP
Q6NV74;C9JFM2;C9JK00;C9JXD6	4	2	18.4615	0.000548485	3.26084	0.000714474	1.77528	1	PM54	CM55	102728	KIAA1211L	Uncharacterized protein KIAA1211-like OS=Homo sapiens OX=9606 GN=KIAA1211L PE=1 SV=3	753.121	906.873	789.813	816.602	2.91201	0.0983346	3	763	1420.51	1487.11	1441.48	1449.7	3.16128	0.0234891	3	458	1.77528	0.828046	UP
A8MPP1;Q96FC9-2;Q96FC9-3;Q96FC9-4;C9K0E8;F5H235;F6WZM0;Q92771;Q96FC9;B4DMS8;F5GXJ8;Q96FC9-5	4	1	22.1917	0.0133015	1.8761	0.00659656	1.79527	0.879353	PM54	CM55	103008	DDX11L8	Putative ATP-dependent RNA helicase DDX11-like protein 8 OS=Homo sapiens OX=9606 GN=DDX11L8 PE=1 SV=1	95.7476	98.8083	108.375	100.977	2.00422	0.0652353	3	1610	230.49	153.92	159.434	181.281	2.25835	0.235572	3	1437	1.79527	0.844202	UP
P63096;P63096-2;C9JPP4	10	3	56.3294	0.0026947	2.56949	0.0019869	1.79847	0.997244	PM54	CM55	40931.4	GNAI1	Guanine nucleotide-binding protein G(i) subunit alpha-1 OS=Homo sapiens OX=9606 GN=GNAI1 PE=1 SV=2	168.125	185.827	226.033	193.328	2.2863	0.153491	3	1410	353.524	356.974	332.587	347.695	2.5412	0.0379554	3	1128	1.79847	0.846769	UP
Q0VF96;Q0VF96-2	5	1	25.5637	0.00142309	2.84677	0.00128264	1.81894	0.999823	PM54	CM55	149650	CGNL1	Cingulin-like protein 1 OS=Homo sapiens OX=9606 GN=CGNL1 PE=1 SV=2	491.347	450.297	384.097	441.914	2.64534	0.122454	3	1047	788.154	846.311	776.978	803.815	2.90516	0.0463103	3	715	1.81894	0.863098	UP
O14654	4	1	19.6731	6.36996e-06	5.19586	7.27912e-05	1.85671	1	PM54	CM55	134794	IRS4	Insulin receptor substrate 4 OS=Homo sapiens OX=9606 GN=IRS4 PE=1 SV=1	229.182	244.027	239.28	237.496	2.37566	0.0319235	3	1317	444.375	443.924	434.589	440.963	2.6444	0.0125283	3	1016	1.85671	0.89275	UP
P21817;P21817-3;P21817-2;M0R014;A0A1B0GVS2;M0R127	30	5	119.474	4.28865e-05	4.36768	0.00015236	1.86206	1	PM54	CM55	570879	RYR1	Ryanodine receptor 1 OS=Homo sapiens OX=9606 GN=RYR1 PE=1 SV=3	631.008	634.701	646.748	637.486	2.80447	0.0129117	3	874	1123.5	1185.12	1252.48	1187.04	3.07446	0.0543434	3	545	1.86206	0.896897	UP
Q9BVQ7;Q9BVQ7-2;Q9BVQ7-3	3	1	15.6789	7.71318e-05	4.11277	0.00020505	1.86529	1	PM54	CM55	81565.8	SPATA5L1	Spermatogenesis-associated protein 5-like protein 1 OS=Homo sapiens OX=9606 GN=SPATA5L1 PE=1 SV=2	2304.86	2226.02	2459.64	2330.17	3.36739	0.0510044	3	347	4468.65	4425.42	4145.26	4346.44	3.63813	0.0403933	3	166	1.86529	0.8994	UP
P35658;A0A0A0MSW3;P35658-2;P35658-3;P35658-4	4	1	16.8754	0.00832768	2.07948	0.00456433	1.86797	0.944446	PM54	CM55	214361	NUP214	Nuclear pore complex protein Nup214 OS=Homo sapiens OX=9606 GN=NUP214 PE=1 SV=2	445.946	408.395	556.358	470.233	2.67231	0.163565	3	1020	1026.78	856.207	752.154	878.379	2.94368	0.157845	3	680	1.86797	0.901468	UP
Q53FD0;H0YE08;J3KMY6;Q53FD0-2	4	1	18.7011	0.00767341	2.11501	0.00428292	1.86821	0.952602	PM54	CM55	51942.8	ZC2HC1C	Zinc finger C2HC domain-containing protein 1C OS=Homo sapiens OX=9606 GN=ZC2HC1C PE=1 SV=3	102.496	77.7313	79.8053	86.6775	1.93791	0.1585	3	1654	156.096	189.965	139.734	161.932	2.20933	0.158207	3	1482	1.86821	0.901655	UP
Q8NCM8;Q8NCM8-2;H0YDE0;Q8NCM8-3	36	6	165.859	0.00293921	2.53177	0.00210569	1.87437	0.996262	PM54	CM55	496101	DYNC2H1	Cytoplasmic dynein 2 heavy chain 1 OS=Homo sapiens OX=9606 GN=DYNC2H1 PE=1 SV=4	518.122	440.183	610.376	522.894	2.71841	0.162933	3	970	991.514	1019.98	928.796	980.096	2.99127	0.0475991	3	626	1.87437	0.906406	UP
P52306;P52306-2;P52306-3;P52306-5;P52306-6;P52306-4;D6RHH8;D6RHZ7;H0Y8M2	7	2	37.4792	0.00270139	2.56841	0.00198789	1.88202	0.997219	PM54	CM55	67115.4	RAP1GDS1	Rap1 GTPase-GDP dissociation stimulator 1 OS=Homo sapiens OX=9606 GN=RAP1GDS1 PE=1 SV=3	282.425	264.233	205.693	250.784	2.3993	0.159878	3	1296	463.966	476.38	475.594	471.98	2.67392	0.0147274	3	981	1.88202	0.912282	UP
M0R0F3;Q6ZN19;Q6ZN19-2;Q6ZN19-3	2	1	8.9888	0.00225385	2.64707	0.00174067	1.8851	0.998596	PM54	CM55	60289.5	ZNF841	Zinc finger protein 841 (Fragment) OS=Homo sapiens OX=9606 GN=ZNF841 PE=1 SV=1	311.5	273.978	270.869	285.449	2.45553	0.0792228	3	1239	534.699	466.585	613.017	538.1	2.73086	0.136174	3	905	1.8851	0.914642	UP
P30559	4	2	27.1527	0.00380839	2.41926	0.00256158	1.90582	0.991458	PM54	CM55	43570	OXTR	Oxytocin receptor OS=Homo sapiens OX=9606 GN=OXTR PE=2 SV=2	293.429	244.004	220.764	252.733	2.40266	0.146837	3	1294	476.926	427.63	540.433	481.663	2.68274	0.117407	3	963	1.90582	0.930413	UP
Q99613;B5ME19;Q99613-2;H3BPE3	3	1	11.0134	0.000382939	3.41687	0.000574589	1.91135	1	PM54	CM55	106028	EIF3C	Eukaryotic translation initiation factor 3 subunit C OS=Homo sapiens OX=9606 GN=EIF3C PE=1 SV=1	679.612	645.79	624.936	650.113	2.81299	0.0424434	3	865	1126.59	1247.31	1353.87	1242.59	3.09433	0.0915118	3	529	1.91135	0.934589	UP
Q12789;Q12789-3;H3BU37	10	1	52.4601	0.00115447	2.93762	0.00110038	1.94829	0.999943	PM54	CM55	241213	GTF3C1	General transcription factor 3C polypeptide 1 OS=Homo sapiens OX=9606 GN=GTF3C1 PE=1 SV=4	259.664	211.817	205.929	225.803	2.35373	0.130519	3	1342	411.988	443.399	464.403	439.93	2.64338	0.0599622	3	1017	1.94829	0.962207	UP
Q92608;E7ERW7;E5RFJ0;F6S220;Q92608-2;H0YB76	10	1	42.6733	0.0180416	1.74372	0.00833391	1.96375	0.820028	PM54	CM55	213260	DOCK2	Dedicator of cytokinesis protein 2 OS=Homo sapiens OX=9606 GN=DOCK2 PE=1 SV=2	47.7378	45.4558	62.4698	51.8878	1.71507	0.177981	3	1743	114.017	116.24	75.4274	101.895	2.00815	0.225217	3	1639	1.96375	0.973614	UP
Q14789;Q14789-2;Q14789-3;Q14789-4;E7EU81;H0Y867	17	1	83.6047	0.0120644	1.91849	0.00610706	1.98293	0.895574	PM54	CM55	377445	GOLGB1	Golgin subfamily B member 1 OS=Homo sapiens OX=9606 GN=GOLGB1 PE=1 SV=2	124.631	190.406	112.368	142.469	2.15372	0.294558	3	1514	269.162	289.809	288.544	282.505	2.45103	0.0409641	3	1226	1.98293	0.987635	UP
E9PJP2;Q5TF21;H3BRB8	5	1	20.2003	0.00127427	2.89474	0.00118501	1.99196	0.999901	PM54	CM55	103227	SOGA3	Protein SOGA3 OS=Homo sapiens OX=9606 GN=SOGA3 PE=1 SV=1	137.492	135.235	160.463	144.397	2.15956	0.096677	3	1511	289.111	254.607	319.179	287.632	2.45884	0.112336	3	1218	1.99196	0.994188	UP
M0R0Y3;Q9Y230;Q9Y230-2	2	1	9.9381	0.00872228	2.05937	0.00471103	1.99399	0.939424	PM54	CM55	38869.7	RUVBL2	RuvB-like helicase OS=Homo sapiens OX=9606 GN=RUVBL2 PE=1 SV=1	211.545	135.021	162.971	169.846	2.23005	0.227987	3	1466	295.841	371.22	348.948	338.67	2.52978	0.114348	3	1140	1.99399	0.995655	UP
Q8IWA5;Q8IWA5-2;Q8IWA5-3	4	2	22.9208	0.00637894	2.19525	0.00375425	2.01402	0.967829	PM54	CM55	81663.5	SLC44A2	Choline transporter-like protein 2 OS=Homo sapiens OX=9606 GN=SLC44A2 PE=1 SV=3	474.651	366.648	311.605	384.301	2.58467	0.215831	3	1106	777.851	850.753	693.373	773.992	2.88874	0.101759	3	734	2.01402	1.01008	UP
Q6NVV1	2	1	14.8851	0.0029693	2.52735	0.00211216	2.01614	0.996129	PM54	CM55	12191.7	RPL13AP3	Putative 60S ribosomal protein L13a protein RPL13AP3 OS=Homo sapiens OX=9606 GN=RPL13AP3 PE=5 SV=1	88.8839	79.7978	68.2586	78.9801	1.89752	0.13088	3	1672	136.04	174.87	166.797	159.235	2.20204	0.128675	3	1494	2.01614	1.0116	UP
Q2LD37;Q2LD37-4;Q2LD37-7;Q2LD37-6;H0Y781;H3BLT5;Q2LD37-2;H7C0Y8	30	2	139.822	0.0218035	1.66147	0.00962747	2.05926	0.777177	PM54	CM55	559703	KIAA1109	Transmembrane protein KIAA1109 OS=Homo sapiens OX=9606 GN=KIAA1109 PE=1 SV=2	287.15	217.041	154.766	219.653	2.34174	0.301524	3	1353	408.916	403.145	544.906	452.322	2.65545	0.177378	3	1005	2.05926	1.04213	UP
A0A0A0MT08;Q68CQ1;Q68CQ1-1;Q68CQ1-9;F8W8P2;Q68CQ1-2;F8WC02;F8WE25;Q68CQ1-8;Q68CQ1-4	5	2	21.289	0.000389834	3.40912	0.000579251	2.09814	1	PM54	CM55	148699	MROH7-TTC4	MROH7-TTC4 readthrough (NMD candidate) OS=Homo sapiens OX=9606 GN=MROH7-TTC4 PE=4 SV=1	232.992	191.589	216.093	213.558	2.32952	0.0974782	3	1364	416.067	464.708	463.449	448.075	2.65135	0.0618791	3	1011	2.09814	1.06911	UP
Q4KWH8;A0A2U3TZV8;Q4KWH8-2;Q4KWH8-3;Q4KWH8-4	11	1	38.0453	7.06168e-05	4.15109	0.000199973	2.11724	1	PM54	CM55	191333	PLCH1	1-phosphatidylinositol 4_5-bisphosphate phosphodiesterase eta-1 OS=Homo sapiens OX=9606 GN=PLCH1 PE=1 SV=1	500.993	475.238	538.446	504.893	2.7032	0.0629523	3	985	1028.52	1057.27	1121.14	1068.98	3.02897	0.0443443	3	588	2.11724	1.08218	UP
Q8WX93;Q8WX93-5;Q8WX93-2;Q8WX93-9;Q8WX93-3;Q8WX93-8;Q8WX93-4;Q8WX93-7;H0YA05;F8WA26	14	3	88.4795	0.000604717	3.21845	0.000731632	2.16018	0.999999	PM54	CM55	151933	PALLD	Palladin OS=Homo sapiens OX=9606 GN=PALLD PE=1 SV=3	267.706	247.279	206.997	240.661	2.38141	0.12836	3	1310	525.832	535.407	498.369	519.87	2.71589	0.0369819	3	923	2.16018	1.11115	UP
P20337;O95716;P20336;Q96E17;S4R3Q3	5	2	46.9085	0.000978676	3.00936	0.000996213	2.17498	0.999979	PM54	CM55	24986.1	RAB3B	Ras-related protein Rab-3B OS=Homo sapiens OX=9606 GN=RAB3B PE=1 SV=2	282.369	315.759	272.575	290.234	2.46275	0.0780084	3	1233	609.258	726.393	558.111	631.254	2.8002	0.136664	3	814	2.17498	1.121	UP
E9PD68;Q14194;Q14194-2	5	1	32.6365	0.00224024	2.6497	0.0017403	2.23756	0.99863	PM54	CM55	62371.9	CRMP1	Dihydropyrimidinase-related protein 1 OS=Homo sapiens OX=9606 GN=CRMP1 PE=1 SV=1	90.3209	64.49	81.0576	78.6228	1.89555	0.166446	3	1673	156.503	192.993	178.273	175.923	2.24532	0.104353	3	1449	2.23756	1.16192	UP
A0A1B0GVP4	5	2	20.0005	0.0277205	1.5572	0.0115435	2.24102	0.717539	PM54	CM55	214111	LCORL	Ligand-dependent nuclear receptor corepressor-like protein OS=Homo sapiens OX=9606 GN=LCORL PE=1 SV=1	214.786	234.337	135.611	194.911	2.28984	0.268214	3	1407	563.376	431.451	315.573	436.8	2.64028	0.283856	3	1023	2.24102	1.16416	UP
H0Y786;H7BZD5;H0Y3P5	30	4	141.031	0.00107755	2.96756	0.00105274	2.24701	0.999962	PM54	CM55	350266	NEB	Nebulin (Fragment) OS=Homo sapiens OX=9606 GN=NEB PE=1 SV=1	860.651	739.304	1023.68	874.544	2.94178	0.163165	3	732	1992.68	1876.45	2026.2	1965.11	3.29339	0.0399939	3	354	2.24701	1.16801	UP
Q13557;D6R938;E9PBG7;E9PF82;Q13557-10;Q13557-11;Q13557-12;Q13557-3;Q13557-4;Q13557-5;Q13557-6;Q13557-8;Q13557-9;H0Y9J2;H0Y9C2;A0A2Q3DQE3;Q13555-10;Q13555-11;Q13555-2;Q13555-3;Q13555-5;Q13555-7;Q13555-8;Q13555-9;Q5SWX3;Q8WU40;Q9UQM7;Q9UQM7-2;D6RHX9;E7EQE4;H0Y6G2	9	3	57.8008	2.38082e-05	4.62327	0.00011491	2.25088	1	PM54	CM55	56996.8	CAMK2D	Calcium/calmodulin-dependent protein kinase type II subunit delta OS=Homo sapiens OX=9606 GN=CAMK2D PE=1 SV=3	584.255	587.145	528.24	566.546	2.75324	0.0586114	3	937	1299.72	1277.65	1248.32	1275.23	3.10559	0.0202202	3	519	2.25088	1.17049	UP
O43795;E9PDF6;O43795-2;E7EQD9;C9JYW1;C9JUP5;C9K0I9;H7C2Y7	16	3	81.7768	0.00445367	2.35128	0.00285427	2.26126	0.986682	PM54	CM55	133012	MYO1B	Unconventional myosin-Ib OS=Homo sapiens OX=9606 GN=MYO1B PE=1 SV=3	212.125	133.369	190.956	178.816	2.25241	0.227927	3	1442	394.181	431.075	387.796	404.35	2.60676	0.0577788	3	1057	2.26126	1.17713	UP
P59923	3	1	13.6533	0.0053267	2.27354	0.0032937	2.31847	0.978862	PM54	CM55	121358	ZNF445	Zinc finger protein 445 OS=Homo sapiens OX=9606 GN=ZNF445 PE=1 SV=1	54.4344	72.6768	56.9298	61.347	1.78779	0.161229	3	1713	135.114	115.717	175.863	142.231	2.15299	0.215831	3	1528	2.31847	1.21317	UP
P17812;P17812-2	13	4	76.2134	0.00110287	2.95747	0.00107212	2.33489	0.999956	PM54	CM55	67374.8	CTPS1	CTP synthase 1 OS=Homo sapiens OX=9606 GN=CTPS1 PE=1 SV=2	79.106	70.4904	99.1717	82.9227	1.91867	0.177474	3	1663	191.606	201.095	188.146	193.616	2.28694	0.0346285	3	1413	2.33489	1.22336	UP
E9PJL7;E9PR44;E9PRA8;P02511;A0A024R3B9;E9PNH7;E9PS12	3	2	22.7407	1.94506e-05	4.71107	0.000111097	2.39668	1	PM54	CM55	15348.4	CRYAB	Alpha-crystallin B chain (Fragment) OS=Homo sapiens OX=9606 GN=CRYAB PE=1 SV=8	1937.84	2005.26	2159.01	2034.04	3.30836	0.0557301	3	388	4865.43	4717.56	5041.84	4874.94	3.68797	0.0333029	3	150	2.39668	1.26104	UP
Q6DRA6;Q6DN03	4	1	19.8498	0.00455909	2.34112	0.00290478	2.39825	0.985815	PM54	CM55	18417.3	HIST2H2BD	Putative histone H2B type 2-D OS=Homo sapiens OX=9606 GN=HIST2H2BD PE=5 SV=3	316.381	474.395	528.999	439.925	2.64338	0.251	3	1049	1057.18	1057.6	1050.37	1055.05	3.02327	0.00384348	3	593	2.39825	1.26198	UP
Q9Y2A7;Q9Y2A7-2	10	1	41.0897	0.00777704	2.10919	0.0043109	2.50984	0.951327	PM54	CM55	130102	NCKAP1	Nck-associated protein 1 OS=Homo sapiens OX=9606 GN=NCKAP1 PE=1 SV=1	133.43	188.212	105.92	142.521	2.15388	0.293939	3	1513	313.894	335.828	423.393	357.705	2.55352	0.161963	3	1118	2.50984	1.3276	UP
Q13200;Q13200-3;Q13200-2;H7C2Q3;C9JPC0	9	3	48.1098	0.0117726	1.92913	0.00599039	2.58478	0.899423	PM54	CM55	100941	PSMD2	26S proteasome non-ATPase regulatory subunit 2 OS=Homo sapiens OX=9606 GN=PSMD2 PE=1 SV=3	51.9195	33.7994	58.3495	48.0228	1.68145	0.265093	3	1753	148.444	131.274	92.6676	124.129	2.09387	0.230137	3	1580	2.58478	1.37004	UP
C9JFR7;P99999	3	1	17.9802	0.00311997	2.50585	0.00216949	2.6005	0.995429	PM54	CM55	11447.4	CYCS	Cytochrome c (Fragment) OS=Homo sapiens OX=9606 GN=CYCS PE=1 SV=1	243.448	144.644	200.19	196.094	2.29246	0.25258	3	1403	521.212	486.878	521.739	509.943	2.70752	0.0391743	3	933	2.6005	1.37879	UP
P60891;B1ALA9;A0A2R8Y7H4;P60891-2;B7ZB02;A0A0B4J207;P21108;B1ALA7;H7C540;Q15244	11	4	93.9226	9.07783e-05	4.04202	0.000227405	2.61376	1	PM54	CM55	35347.5	PRPS1	Ribose-phosphate pyrophosphokinase 1 OS=Homo sapiens OX=9606 GN=PRPS1 PE=1 SV=2	1534.39	1847.17	1780.21	1720.59	3.23568	0.0957175	3	452	4403.08	4688.63	4399.92	4497.21	3.65294	0.0368643	3	161	2.61376	1.38612	UP
Q6ZMW3;Q6ZMW3-2	9	1	43.4568	0.00537136	2.26992	0.00330563	2.67824	0.978426	PM54	CM55	220409	EML6	Echinoderm microtubule-associated protein-like 6 OS=Homo sapiens OX=9606 GN=EML6 PE=2 SV=2	90.0171	70.7931	76.938	79.2494	1.899	0.12389	3	1671	201.872	158.501	276.373	212.249	2.32684	0.280882	3	1370	2.67824	1.42128	UP
Q9NR31;D6RAA2;D6RD69;D6RDB2;Q5SQT8;Q9Y6B6;X1WI22	3	2	14.5052	0.000992851	3.00312	0.000999541	2.74376	0.999977	PM54	CM55	22480.9	SAR1A	GTP-binding protein SAR1a OS=Homo sapiens OX=9606 GN=SAR1A PE=1 SV=1	120.559	128.295	169.997	139.617	2.14494	0.190471	3	1525	371.15	355.144	422.931	383.075	2.58328	0.0924935	3	1084	2.74376	1.45615	UP
A0A087WUS0;A0A2R8Y849;A0A2R8YD14;E7ETK0;P62847;P62847-2;P62847-3;P62847-4;A0A2R8Y8A0	3	1	18.4267	0.00391917	2.40681	0.00260174	2.74565	0.990707	PM54	CM55	15353.2	RPS24	40S ribosomal protein S24 OS=Homo sapiens OX=9606 GN=RPS24 PE=1 SV=1	97.7378	80.2584	142.527	106.841	2.02874	0.300607	3	1591	315.291	290.824	273.93	293.348	2.46738	0.070891	3	1202	2.74565	1.45715	UP
Q96HE7;G3V3E6;G3V5B3;G3V503	3	1	21.2408	0.00286852	2.54234	0.00207207	2.77602	0.996563	PM54	CM55	55248.1	ERO1A	ERO1-like protein alpha OS=Homo sapiens OX=9606 GN=ERO1A PE=1 SV=2	569.616	442.664	417.326	476.535	2.6781	0.171236	3	1015	1339.3	1039.73	1589.58	1322.87	3.12152	0.208103	3	500	2.77602	1.47302	UP
Q8WXG1	4	1	18.0433	0.000864828	3.06307	0.000910959	2.7764	0.99999	PM54	CM55	42797.1	RSAD2	Radical S-adenosyl methionine domain-containing protein 2 OS=Homo sapiens OX=9606 GN=RSAD2 PE=1 SV=1	135.319	168.206	173.129	158.885	2.20108	0.129379	3	1492	438.412	378.973	506.001	441.128	2.64457	0.144079	3	1015	2.7764	1.47322	UP
O60229;J3QSW6;H7BXZ5;C9IZQ6;O60229-2;O60229-3;O60229-4	18	3	68.3254	0.000117391	3.93036	0.000253455	2.79353	1	PM54	CM55	343311	KALRN	Kalirin OS=Homo sapiens OX=9606 GN=KALRN PE=1 SV=2	331.141	306.591	384.545	340.759	2.53245	0.116966	3	1154	919.23	980.58	955.96	951.923	2.9786	0.0324327	3	637	2.79353	1.48209	UP
Q9BXL7	5	1	16.545	0.000531934	3.27414	0.000703262	2.79483	1	PM54	CM55	134596	CARD11	Caspase recruitment domain-containing protein 11 OS=Homo sapiens OX=9606 GN=CARD11 PE=1 SV=3	344.577	291.568	351.623	329.256	2.51753	0.0997051	3	1175	976.328	777.102	1007.21	920.212	2.96389	0.135724	3	655	2.79483	1.48276	UP
Q96DT6;A6NGQ4;H7BZW5	2	1	9.0493	0.00044234	3.35424	0.000633194	2.79902	1	PM54	CM55	53067.8	ATG4C	Cysteine protease ATG4C OS=Homo sapiens OX=9606 GN=ATG4C PE=1 SV=1	236.96	179.305	231.162	215.809	2.33407	0.147101	3	1362	557.836	631.352	622.974	604.054	2.78108	0.0666244	3	839	2.79902	1.48492	UP
P12111;P12111-2;E7ENL6;P12111-4;P12111-3;P12111-5;C9JNG9	18	2	76.3332	0.000863122	3.06393	0.000910959	2.84473	0.99999	PM54	CM55	345381	COL6A3	Collagen alpha-3(VI) chain OS=Homo sapiens OX=9606 GN=COL6A3 PE=1 SV=5	163.908	193.653	227.441	195.001	2.29004	0.163015	3	1405	486.93	618.777	558.466	554.725	2.74408	0.118983	3	883	2.84473	1.50829	UP
Q8IW52	8	1	34.5681	0.00433611	2.3629	0.00280547	2.91726	0.987622	PM54	CM55	95414.6	SLITRK4	SLIT and NTRK-like protein 4 OS=Homo sapiens OX=9606 GN=SLITRK4 PE=1 SV=1	97.523	76.9945	56.1241	76.8805	1.88582	0.269245	3	1679	185	255.978	231.864	224.281	2.35079	0.160922	3	1346	2.91726	1.54462	UP
P52179;P52179-2;A8MX12	5	1	19.6247	0.000568818	3.24503	0.000717059	2.92604	1	PM54	CM55	189109	MYOM1	Myomesin-1 OS=Homo sapiens OX=9606 GN=MYOM1 PE=1 SV=2	467.778	639.289	656.329	587.799	2.76923	0.177424	3	919	1723.47	1707.01	1729.3	1719.92	3.23551	0.0067214	3	407	2.92604	1.54895	UP
A0A0J9YY01;Q96JP2;A0A286YF23;A0A0J9YW50;A0A0J9YYJ7;A0A2R8YFM0;A0A0J9YXD6	11	4	53.6068	0.000256632	3.59069	0.000423162	2.97223	1	PM54	CM55	336004	MYO15B	Unconventional myosin-XVB OS=Homo sapiens OX=9606 GN=MYO15B PE=1 SV=1	535.808	453.543	394.736	461.362	2.66404	0.15359	3	1028	1355.96	1413.67	1344.19	1371.27	3.13712	0.0271176	3	485	2.97223	1.57154	UP
Q04760	2	2		0.000673777	3.17148	0.000787883	2.99805	0.999998	PM54	CM55	21005.9	GLO1	Lactoylglutathione lyase OS=Homo sapiens OX=9606 GN=GLO1 PE=1 SV=4	146.406	114.49	100.531	120.475	2.0809	0.195192	3	1560	339.908	357.768	385.899	361.191	2.55774	0.0641932	3	1114	2.99805	1.58402	UP
Q16222;Q16222-3;Q16222-2	7	4	40.3029	5.84787e-05	4.233	0.000185452	3.0181	1	PM54	CM55	59168.3	UAP1	UDP-N-acetylhexosamine pyrophosphorylase OS=Homo sapiens OX=9606 GN=UAP1 PE=1 SV=3	482.097	446.532	549.693	492.774	2.69265	0.106342	3	1002	1493.49	1519.21	1449.03	1487.24	3.17238	0.0238717	3	450	3.0181	1.59364	UP
P05060	5	1	22.76	0.000711716	3.14769	0.000818033	3.1211	0.999998	PM54	CM55	78390.4	CHGB	Secretogranin-1 OS=Homo sapiens OX=9606 GN=CHGB PE=1 SV=2	152.147	121.316	127.749	133.737	2.12625	0.121617	3	1532	339.172	453.404	459.645	417.407	2.62056	0.162493	3	1039	3.1211	1.64205	UP
A6NHL2;A6NHL2-2	8	1	58.9312	3.23098e-05	4.49067	0.000134323	3.12523	1	PM54	CM55	50707.2	TUBAL3	Tubulin alpha chain-like 3 OS=Homo sapiens OX=9606 GN=TUBAL3 PE=1 SV=2	36.2932	31.0226	32.551	33.2889	1.5223	0.0814578	3	1782	97.9283	107.332	106.846	104.036	2.01718	0.0508918	3	1631	3.12523	1.64396	UP
P60903	5	1	30.9975	0.000203244	3.69198	0.000362674	3.14331	1	PM54	CM55	11317.2	S100A10	Protein S100-A10 OS=Homo sapiens OX=9606 GN=S100A10 PE=1 SV=2	149.639	115.844	126.288	130.591	2.11591	0.132499	3	1540	378.123	444.49	408.848	410.487	2.6133	0.0809122	3	1052	3.14331	1.65228	UP
Q00765;E2QRG8;B7Z332;B7Z510;H0Y8J8;Q00765-2	4	2	30.5249	7.35333e-05	4.13352	0.000201939	3.43106	1	PM54	CM55	21721.3	REEP5	Receptor expression-enhancing protein 5 OS=Homo sapiens OX=9606 GN=REEP5 PE=1 SV=3	81.2277	92.5799	101.325	91.7107	1.96242	0.109874	3	1641	295.054	314.804	334.136	314.665	2.49785	0.0621018	3	1170	3.43106	1.77865	UP
D6RFM5;P31040;P31040-2;A0A087X1I3;P31040-3	6	2	27.9588	0.00161814	2.79098	0.00138674	3.43517	0.999668	PM54	CM55	64479.6	SDHA	Succinate dehydrogenase [ubiquinone] flavoprotein subunit_ mitochondrial OS=Homo sapiens OX=9606 GN=SDHA PE=1 SV=1	30.3824	47.2216	36.0045	37.8695	1.57829	0.226387	3	1773	112.183	121.281	156.8	130.088	2.11424	0.181233	3	1568	3.43517	1.78038	UP
A0A0U1RRM6;Q8N8S7;Q8N8S7-2;Q8N8S7-3;A0A075B6E5;A0A0U1RQP7	4	2	23.3388	0.00134589	2.87099	0.00123465	3.51622	0.999868	PM54	CM55	87742.4	ENAH	Protein enabled homolog OS=Homo sapiens OX=9606 GN=ENAH PE=1 SV=1	93.3538	61.7794	91.7738	82.3024	1.91541	0.216166	3	1666	293.569	328.732	245.878	289.393	2.46149	0.143697	3	1213	3.51622	1.81402	UP
Q9UQ35;Q9UQ35-2;A0A087X1W1;I3L182;I3L1C0;I3L1I8;I3L4D8;Q9UQ35-3	16	1	77.7067	0.000714136	3.14622	0.000818408	4.06973	0.999997	PM54	CM55	300357	SRRM2	Serine/arginine repetitive matrix protein 2 OS=Homo sapiens OX=9606 GN=SRRM2 PE=1 SV=2	231.717	164.964	151.686	182.789	2.26195	0.234641	3	1434	687.893	861.951	681.861	743.901	2.87152	0.137489	3	749	4.06973	2.02493	UP
O75886;O75886-2	5	2	29.2456	0.000194346	3.71142	0.000351613	4.16583	1	PM54	CM55	58563.5	STAM2	Signal transducing adapter molecule 2 OS=Homo sapiens OX=9606 GN=STAM2 PE=1 SV=1	284.9	225.763	323.106	277.923	2.44392	0.176471	3	1245	1136.98	1108.38	1227.98	1157.78	3.06363	0.0539418	3	557	4.16583	2.0586	UP
A0A286YF22;O43175;A0A2C9F2M7;A0A286YFA2;A0A286YER3;A0A286YFB2;A0A286YFC8;A0A286YFL2;A0A286YFM8;A0A286YF34;A0A286YFF3;A0A286YFK5	6	3	35.3125	0.00105575	2.97644	0.00103663	4.68233	0.999966	PM54	CM55	56680.1	PHGDH	D-3-phosphoglycerate dehydrogenase OS=Homo sapiens OX=9606 GN=PHGDH PE=1 SV=1	58.2052	86.0051	57.9767	67.3957	1.82863	0.239135	3	1696	322.012	245.545	379.15	315.569	2.49909	0.212426	3	1169	4.68233	2.22723	UP
A0A2R8Y5F1;A0A2R8Y7C8;A0A2R8YDR3;A0A2R8YGD6;A0A2R8YGU4;H3BMQ0;P49815;P49815-2;P49815-3;P49815-4;P49815-5;P49815-7;X5D2U8;A0A2R8Y7X5;A0A2R8YDZ2;P49815-6;A0A2R8YEJ8;A0A2R8Y5B2;A0A2R8YGE6;C9JX95	6	1	22.2816	0.000121761	3.91449	0.000255881	5.01014	1	PM54	CM55	195030	TSC2	Tuberin OS=Homo sapiens OX=9606 GN=TSC2 PE=1 SV=1	198.241	154.31	146.643	166.398	2.22115	0.167321	3	1476	830.443	917.872	752.721	833.678	2.921	0.0991066	3	697	5.01014	2.32485	UP
O00750;F5GWN5	9	2	46.8549	9.90265e-05	4.00425	0.000228985	5.15569	1	PM54	CM55	186935	PIK3C2B	Phosphatidylinositol 4-phosphate 3-kinase C2 domain-containing subunit beta OS=Homo sapiens OX=9606 GN=PIK3C2B PE=1 SV=2	168.201	122.627	163.866	151.565	2.1806	0.165965	3	1501	771.203	745.536	827.523	781.421	2.89288	0.0536687	3	727	5.15569	2.36617	UP
P17050	3	1	13.7542	1.82254e-07	6.73932	1.01747e-05	5.38088	1	PM54	CM55	47078	NAGA	Alpha-N-acetylgalactosaminidase OS=Homo sapiens OX=9606 GN=NAGA PE=1 SV=2	1661.17	1714.53	1661.62	1679.1	3.22508	0.0182713	3	464	8759.22	8978.98	9366.99	9035.06	3.95593	0.034061	3	77	5.38088	2.42784	UP
P11908;P11908-2;A6NMS2;D3YTJ7	10	1	62.7289	9.41487e-05	4.02619	0.000228376	5.93809	1	PM54	CM55	35168.4	PRPS2	Ribose-phosphate pyrophosphokinase 2 OS=Homo sapiens OX=9606 GN=PRPS2 PE=1 SV=2	17.0562	22.1835	23.583	20.9409	1.321	0.164092	3	1808	111.533	133.727	127.787	124.349	2.09464	0.0923959	3	1579	5.93809	2.57	UP
Q96FQ6	4	3	23.7571	1.44698e-05	4.83954	0.000106692	9.26163	1	PM54	CM55	11858.4	S100A16	Protein S100-A16 OS=Homo sapiens OX=9606 GN=S100A16 PE=1 SV=1	39.8355	31.682	29.8652	33.7942	1.52884	0.157132	3	1781	307.802	317.01	314.157	312.99	2.49553	0.0150592	3	1173	9.26163	3.21127	UP
Q4LDE5;A0A0A0MSD0;Q4LDE5-2;Q4LDE5-4	11	1	47.8468	7.57067e-05	4.12087	0.000202729	9.4082	1	PM54	CM55	404941	SVEP1	Sushi_ von Willebrand factor type A_ EGF and pentraxin domain-containing protein 1 OS=Homo sapiens OX=9606 GN=SVEP1 PE=1 SV=3	48.0768	72.8604	57.7798	59.5723	1.77504	0.209639	3	1724	602.903	494.54	583.962	560.469	2.74855	0.103264	3	879	9.4082	3.23392	UP
Q8TD84;Q8TD84-2	6	1	25.3045	6.38686e-05	4.19471	0.000192414	10.3552	1	PM54	CM55	226288	DSCAML1	Down syndrome cell adhesion molecule-like protein 1 OS=Homo sapiens OX=9606 GN=DSCAML1 PE=1 SV=2	36.1147	48.0131	54.4571	46.195	1.66459	0.201437	3	1758	461.866	534.047	439.164	478.359	2.67975	0.103572	3	967	10.3552	3.37229	UP
Q15691	7	1	44.769	0.0228025	1.64202	0.00998103	19.7731	0.766458	PM54	CM55	30170.2	MAPRE1	Microtubule-associated protein RP/EB family member 1 OS=Homo sapiens OX=9606 GN=MAPRE1 PE=1 SV=3	8.97351	10.1418		9.55766	0.980352	0.0864346	2	1839	124.142	145.269	108.558	125.99	2.10034	0.146243	3	1577	13.1821	3.72051	UP
P25092	5	2	25.2676	0.0207138	1.68374	0.00927232	34.9488	0.789182	PM54	CM55	124430	GUCY2C	Heat-stable enterotoxin receptor OS=Homo sapiens OX=9606 GN=GUCY2C PE=1 SV=2		19.2991	13.6393	16.4692	1.21667	0.243006	2	1825	350.963	385.106	415.088	383.719	2.58401	0.0836151	3	1082	23.2992	4.54221	UP
Q13523;H0YDJ3	2	2	7.8227	4.42286e-05	4.3543	0.000154322	25.8506	1	PM54	CM55	117329	PRPF4B	Serine/threonine-protein kinase PRP4 homolog OS=Homo sapiens OX=9606 GN=PRPF4B PE=1 SV=3	22.5687	24.8244	14.3514	20.5815	1.31348	0.267815	3	1810	553.566	500.395	542.176	532.046	2.72595	0.0526185	3	911	25.8506	4.69213	UP
