# Supplementary material for: The Proteome Profile of Olfactory Ecto-Mesenchymal Stem Cells-Derived from Patients with Familial Alzheimer’s Disease Reveals New Insights for AD Study
Source: Int J Mol Sci. 2023 Aug 9;24(16):12606. doi: 10.3390/ijms241612606 (PMC10454072; doi:10.3390/ijms241612606)
Supplement: Supplementary file 1 [file ijms-24-12606-s001.zip › Table S3. WEBGESTALT analysis (P1-C1) GO, pathways and diseases.xlsx]

## Sheet: s1-BP
geneSet	BIOLOGICAL PROCESS	size	overlap	expect	enrichmentRatio	pValue	FDR	userId
GO:0016192	vesicle-mediated transport	1942	72	37.987	1.89538	5.08953e-08	4.20627e-05	HBB;ITGA2;DYSF;ALB;PGM2;FN1;SCIN;CALR;LRP1B;PIK3C2A;SNX6;MYO1E;SCARB2;PGRMC1;TGM2;THBS1;DPYSL2;ACTN2;GNAI2;PIKFYVE;PRDX6;ALMS1;HSPA1A;HSP90AB1;CD81;ADAM10;KIF15;ANXA11;HYOU1;SPTB;PGAM1;HSP90B1;ALDOC;SH3GL1;CTTN;ANXA5;GSN;PKM;SOD1;AP2B1;LMAN2;ATP2A2;EPS15L1;PCLO;CANX;DSP;CLTA;CTSD;CHMP5;CLTCL1;KIF5B;RAB14;CD59;DCTN1;MAPK1;LOXL2;ROCK1;OLA1;NME1;DOCK2;GOLGB1;SLC44A2;KIAA1109;RAB3B;MYO1B;NCKAP1;PSMD2…
GO:0006928	movement of cell or subcellular component	1967	74	38.4761	1.92327	1.69409e-08	1.92512e-05	ITGA2;KDR;DYSF;DES;DNAH14;PEAK1;FN1;ENG;STAT1;CALR;COL1A2;TPM2;PIK3C2A;MYO1E;DNAH6;MAP4;COL1A1;THBS1;PAK3;SFPQ;MAP2K3;DPYSL2;ASH1L;ACTN2;GNAI2;ARHGEF16;PGAM4;ITGA11;ATP1A1;CD81;ADAM10;KIF15;SPTB;PML;FAM129B;HSPA5;HNRNPU;RRAS;TPM3;CTTN;CTNNA2;ANXA5;ALCAM;LMNA;ITGA5;DYNLRB2;SOD1;VIM;DNAH10;C1QBP;DSP;DNAH1;DOCK4;SLC3A2;MBOAT7;KIF5B;DCTN1;KARS;WDR19;MAPK1;LOXL2;ROCK1;TUBB3;DYNC2H1;PALLD;CRMP1;NEB;CAM…
GO:0042981	regulation of apoptotic process	1517	58	29.6737	1.95459	5.04759e-07	0.000305918	IFIT3;KDR;AKR1B1;ALB;NGEF;ENG;STAT1;YWHAB;SCIN;CALR;ERP29;NKX3-2;PHLPP1;SETX;OXR1;EIF2AK2;NLRC4;TGM2;PDIA3;THBS1;PAK3;SFPQ;ACTN2;GNAI2;ARHGEF16;TRIM2;HSPA1A;HSP90AB1;NQO1;ADAM10;HYOU1;PML;HSP90B1;FAM129B;HSPA5;CTTN;ANXA5;GSN;DIP2A;P4HB;LMNA;ITGA5;SOD1;SERBP1;C1QBP;YWHAE;FHL2;QARS;SLC25A5;ROCK1;NME1;PAK2;CAMK2D;CRYAB;CYCS;KALRN;CARD11;GLO1
GO:0007010	cytoskeleton organization	1300	57	25.429	2.24153	5.9787e-09	9.05872e-06	CEP192;DES;ERBIN;MTCL1;CEP152;TACC2;SCIN;CALR;TPM2;MAP4;C2CD3;FMNL2;PAK3;DPYSL2;ACTN2;CEP250;ALMS1;HSPA1A;SPTB;COBL;HSP90B1;HNRNPU;TPM3;CTTN;CTNNA2;GSN;LMNA;SOD1;NIN;PLS1;NES;VIM;PCLO;DSP;DNAH1;CHMP5;STMN2;DCTN1;MAPK1;ABRAXAS2;PLEC;ROCK1;TUBB3;GNAI1;CGNL1;RAP1GDS1;DOCK2;PALLD;CRMP1;NEB;MYO1B;CRYAB;NCKAP1;MYOM1;TUBAL3;S100A10;MAPRE1
GO:0098657	import into cell	792	39	15.4921	2.51741	1.08634e-07	7.59683e-05	HBB;ITGA2;DYSF;ALB;CALR;LRP1B;PIK3C2A;MYO1E;SCARB2;TGM2;THBS1;DPYSL2;PIKFYVE;ATP1A1;HSP90AB1;CD81;ANXA11;HYOU1;HSP90B1;SH3GL1;CTTN;GSN;AP2B1;LMAN2;EPS15L1;CANX;CLTA;SLC3A2;CLTCL1;RAB14;MAPK1;LOXL2;ROCK1;NME1;DOCK2;KIAA1109;RAB3B;NCKAP1;TSC2
GO:0044419	interspecies interaction between organisms	815	43	15.942	2.69727	2.96037e-09	7.1542e-06	MX1;ITGA2;OAS3;KDR;ALB;FN1;STAT1;YWHAB;CTNND1;SGTA;PI4KA;TAF1;SCARB2;EIF2AK2;NOS2;HSPA1A;HSP90AB1;CD81;PSMA4;PML;GSN;P4HB;PCSK5;RANBP1;ITGA5;AP2B1;VIM;C1QBP;YWHAE;CHMP5;ADAR;KARS;MAPK1;IPO5;SLC25A5;SSB;UBR5;PAK2;NUP214;DOCK2;NCKAP1;RSAD2;TSC2
GO:0006897	endocytosis	675	36	13.2035	2.72654	4.91512e-08	4.20627e-05	HBB;ITGA2;DYSF;ALB;CALR;LRP1B;PIK3C2A;MYO1E;SCARB2;TGM2;THBS1;DPYSL2;PIKFYVE;HSP90AB1;CD81;ANXA11;HYOU1;HSP90B1;SH3GL1;CTTN;GSN;AP2B1;LMAN2;EPS15L1;CANX;CLTA;CLTCL1;RAB14;MAPK1;LOXL2;ROCK1;NME1;DOCK2;KIAA1109;NCKAP1;TSC2
GO:0044403	symbiont process	768	42	15.0227	2.79577	1.60022e-09	7.1542e-06	MX1;ITGA2;OAS3;KDR;ALB;FN1;STAT1;YWHAB;CTNND1;SGTA;PI4KA;TAF1;SCARB2;EIF2AK2;HSPA1A;HSP90AB1;CD81;PSMA4;PML;GSN;P4HB;PCSK5;RANBP1;ITGA5;AP2B1;VIM;C1QBP;YWHAE;CHMP5;ADAR;KARS;MAPK1;IPO5;SLC25A5;SSB;UBR5;PAK2;NUP214;DOCK2;NCKAP1;RSAD2;TSC2
GO:0097435	supramolecular fiber organization	640	35	12.5189	2.79577	4.13474e-08	4.17655e-05	CEP192;DES;SCIN;COL1A2;TPM2;COL1A1;PAK3;P4HA1;ACTN2;ALMS1;HSPA1A;HSP90AB1;SPTB;COBL;HSP90B1;TPM3;CTTN;GSN;NIN;PLS1;VIM;DSP;SERPINH1;STMN2;DCTN1;LOXL2;ROCK1;CGNL1;NEB;MYO1B;CRYAB;NCKAP1;MYOM1;S100A10;MAPRE1
GO:0016032	viral process	707	39	13.8295	2.82006	5.1147e-09	9.05872e-06	MX1;ITGA2;OAS3;KDR;STAT1;YWHAB;SGTA;PI4KA;TAF1;SCARB2;EIF2AK2;HSPA1A;HSP90AB1;CD81;PSMA4;PML;GSN;P4HB;PCSK5;RANBP1;ITGA5;AP2B1;VIM;C1QBP;YWHAE;CHMP5;ADAR;KARS;MAPK1;IPO5;SLC25A5;SSB;UBR5;PAK2;NUP214;DOCK2;NCKAP1;RSAD2;TSC2
GO:0003012	muscle system process	423	27	8.27421	3.26315	7.53351e-08	5.70726e-05	ITGA2;DYSF;DES;TPM2;PIK3C2A;SRSF1;MAP2K3;ACTN2;ATP1A1;TPM3;CTTN;GSN;GSTO1;LMNA;SOD1;ATP2A2;VIM;DSP;DOCK4;ROCK1;RYR1;RAP1GDS1;OXTR;NEB;CAMK2D;CRYAB;MYOM1
GO:0006936	muscle contraction	339	25	6.63111	3.77011	1.41213e-08	1.83396e-05	ITGA2;DYSF;DES;TPM2;PIK3C2A;SRSF1;MAP2K3;ACTN2;ATP1A1;TPM3;CTTN;GSTO1;SOD1;ATP2A2;VIM;DSP;DOCK4;ROCK1;RYR1;RAP1GDS1;OXTR;NEB;CAMK2D;CRYAB;MYOM1
GO:0034976	response to endoplasmic reticulum stress	268	23	5.24229	4.3874	3.14782e-09	7.1542e-06	CALR;ITPR1;ERP29;SGTA;EIF2AK2;PDIA3;THBS1;RCN3;PDIA6;HSPA1A;HYOU1;DNAJB11;PML;HSP90B1;HSPA5;GFPT1;P4HB;LMNA;ATP2A2;PDIA4;GORASP2;DCTN1;ERO1A
GO:0006986	response to unfolded protein	168	16	3.28621	4.86883	1.99991e-07	0.000129865	CALR;HSPB7;EIF2AK2;THBS1;PDIA6;HSPA1A;HSP90AB1;HYOU1;DNAJB11;HSP90B1;HSPA5;GFPT1;LMNA;SERPINH1;DCTN1;ERO1A
GO:0006457	protein folding	210	21	4.10776	5.11227	9.93605e-10	7.1542e-06	CALR;ERP29;SGTA;PDIA3;PDIA6;GNAI2;GNB2;BAG2;HSPA1A;HSP90AB1;DNAJB11;HSP90B1;HSPA5;P4HB;CRTAP;CANX;PDIA4;GNAI1;RUVBL2;CRYAB;ERO1A

## Sheet: s2-CC
geneSet	description	size	overlap	expect	enrichmentRatio	pValue	FDR	userId
GO:0015630	microtubule cytoskeleton	1165	49	18.9356	2.58772	7.06146e-10	5.53148e-08	CEP192;DYSF;DNAH14;MTCL1;GRAMD2B;CEP152;ANKRD26;TACC2;CENPF;DNAH6;MAP4;C2CD3;DPYSL2;CEP250;GNAI2;ALMS1;BAG2;HSPA1A;KIF15;ANXA11;HNRNPU;CTTN;RANBP1;PCGF5;DYNLRB2;NIN;DNAH10;YWHAE;CLTA;DNAH1;RIF1;CLTCL1;KIF5B;DCTN1;MAPK1;ABRAXAS2;SLC25A5;ROCK1;OLA1;NME1;TUBB3;GNAI1;DYNC2H1;RUVBL2;CRMP1;CRYAB;EML6;TUBAL3;MAPRE1
GO:0044430	cytoskeletal part	1621	74	26.3472	2.80864	1.11022e-16	2.17419e-14	CEP192;DYSF;DES;DNAH14;SH3PXD2A;MTCL1;GRAMD2B;CEP152;ANKRD26;TACC2;SCIN;TPM2;CENPF;MYO1E;DNAH6;MAP4;C2CD3;DPYSL2;ACTN2;CEP250;GNAI2;ALMS1;BAG2;HSPA1A;KIF15;ANXA11;SPTB;COBL;HNRNPU;SH3GL1;TPM3;CTTN;GSN;LMNA;RANBP1;PCGF5;DYNLRB2;NIN;PLS1;NES;KRT10;VIM;DNAH10;KRT78;YWHAE;DSP;CLTA;DNAH1;RIF1;CLTCL1;KIF5B;DCTN1;MAPK1;ABRAXAS2;PLEC;SLC25A5;ROCK1;OLA1;NME1;TUBB3;GNAI1;CGNL1;DYNC2H1;RUVBL2;PALLD;CRMP1;MY…
GO:0030054	cell junction	1268	64	20.6097	3.10534	2.22045e-16	3.72718e-14	ITGA2;IQGAP3;KDR;AKR1B1;LAP3;DES;ERBIN;SH3PXD2A;PEAK1;ENG;YWHAB;SCIN;CALR;CTNND1;PI4KA;MYO1E;SCARB2;TGM2;PDLIM1;PDIA3;ASH1L;ACTN2;PIKFYVE;GNB2;ITGA11;SDK1;HSPA1A;ATP1A1;CD81;ADAM10;HYOU1;HSP90B1;FAM129B;HSPA5;SH3GL1;RRAS;CTTN;CTNNA2;ANXA5;GSN;CDH9;P4HB;ALCAM;ITGA5;ATP2A2;VIM;PCLO;YWHAE;DSP;FHL2;BASP1;CD59;CDH6;MAPK1;PLEC;RPL6;CGNL1;NUP214;OXTR;PALLD;NCKAP1;ENAH;DSCAML1;MAPRE1
GO:0099080	supramolecular complex	922	50	14.9859	3.33647	4.22995e-14	4.51836e-12	DYSF;DES;DNAH14;FBN1;GRAMD2B;COL1A2;TPM2;DNAH6;MAP4;PDLIM1;COL1A1;DPYSL2;ACTN2;BAG2;KIF15;COBL;HNRNPU;TPM3;CTTN;LMNA;DYNLRB2;NIN;PLS1;NES;KRT10;VIM;DNAH10;KRT78;DSP;DNAH1;PSMA6;FHL2;KIF5B;DCTN1;ABRAXAS2;PLEC;NME1;TUBB3;RYR1;DYNC2H1;PALLD;NEB;MYO1B;CRYAB;NCKAP1;EML6;COL6A3;MYOM1;TUBAL3;MAPRE1
GO:0099081	supramolecular polymer	921	50	14.9697	3.34009	4.05231e-14	4.51836e-12	DYSF;DES;DNAH14;FBN1;GRAMD2B;COL1A2;TPM2;DNAH6;MAP4;PDLIM1;COL1A1;DPYSL2;ACTN2;BAG2;KIF15;COBL;HNRNPU;TPM3;CTTN;LMNA;DYNLRB2;NIN;PLS1;NES;KRT10;VIM;DNAH10;KRT78;DSP;DNAH1;PSMA6;FHL2;KIF5B;DCTN1;ABRAXAS2;PLEC;NME1;TUBB3;RYR1;DYNC2H1;PALLD;NEB;MYO1B;CRYAB;NCKAP1;EML6;COL6A3;MYOM1;TUBAL3;MAPRE1
GO:0099512	supramolecular fiber	914	50	14.8559	3.36567	3.01981e-14	3.94253e-12	DYSF;DES;DNAH14;FBN1;GRAMD2B;COL1A2;TPM2;DNAH6;MAP4;PDLIM1;COL1A1;DPYSL2;ACTN2;BAG2;KIF15;COBL;HNRNPU;TPM3;CTTN;LMNA;DYNLRB2;NIN;PLS1;NES;KRT10;VIM;DNAH10;KRT78;DSP;DNAH1;PSMA6;FHL2;KIF5B;DCTN1;ABRAXAS2;PLEC;NME1;TUBB3;RYR1;DYNC2H1;PALLD;NEB;MYO1B;CRYAB;NCKAP1;EML6;COL6A3;MYOM1;TUBAL3;MAPRE1
GO:0099513	polymeric cytoskeletal fiber	692	39	11.2476	3.46742	1.17657e-11	1.15206e-09	DYSF;DES;DNAH14;GRAMD2B;TPM2;DNAH6;MAP4;DPYSL2;ACTN2;BAG2;KIF15;COBL;HNRNPU;TPM3;CTTN;LMNA;DYNLRB2;NIN;PLS1;NES;KRT10;VIM;DNAH10;KRT78;DSP;DNAH1;KIF5B;DCTN1;ABRAXAS2;PLEC;NME1;TUBB3;DYNC2H1;PALLD;MYO1B;NCKAP1;EML6;TUBAL3;MAPRE1
GO:0070161	anchoring junction	554	49	9.00455	5.4417	0	0	ITGA2;LAP3;DES;PEAK1;ENG;YWHAB;CALR;CTNND1;PI4KA;MYO1E;SCARB2;TGM2;PDLIM1;PDIA3;ACTN2;GNB2;ITGA11;HSPA1A;CD81;ADAM10;HYOU1;HSP90B1;FAM129B;HSPA5;RRAS;CTTN;CTNNA2;ANXA5;GSN;CDH9;P4HB;ALCAM;ITGA5;ATP2A2;VIM;YWHAE;DSP;FHL2;CD59;CDH6;MAPK1;PLEC;RPL6;NUP214;OXTR;PALLD;NCKAP1;ENAH;MAPRE1
GO:0005912	adherens junction	538	49	8.74449	5.60353	0	0	ITGA2;LAP3;DES;PEAK1;ENG;YWHAB;CALR;CTNND1;PI4KA;MYO1E;SCARB2;TGM2;PDLIM1;PDIA3;ACTN2;GNB2;ITGA11;HSPA1A;CD81;ADAM10;HYOU1;HSP90B1;FAM129B;HSPA5;RRAS;CTTN;CTNNA2;ANXA5;GSN;CDH9;P4HB;ALCAM;ITGA5;ATP2A2;VIM;YWHAE;DSP;FHL2;CD59;CDH6;MAPK1;PLEC;RPL6;NUP214;OXTR;PALLD;NCKAP1;ENAH;MAPRE1
GO:0005924	cell-substrate adherens junction	407	39	6.61525	5.89547	0	0	ITGA2;LAP3;PEAK1;ENG;YWHAB;CALR;PI4KA;SCARB2;TGM2;PDLIM1;PDIA3;ACTN2;GNB2;ITGA11;HSPA1A;CD81;ADAM10;HYOU1;HSP90B1;HSPA5;RRAS;CTTN;ANXA5;GSN;P4HB;ALCAM;ITGA5;VIM;YWHAE;FHL2;CD59;MAPK1;PLEC;RPL6;NUP214;PALLD;NCKAP1;ENAH;MAPRE1
GO:0005925	focal adhesion	404	39	6.56649	5.93924	0	0	ITGA2;LAP3;PEAK1;ENG;YWHAB;CALR;PI4KA;SCARB2;TGM2;PDLIM1;PDIA3;ACTN2;GNB2;ITGA11;HSPA1A;CD81;ADAM10;HYOU1;HSP90B1;HSPA5;RRAS;CTTN;ANXA5;GSN;P4HB;ALCAM;ITGA5;VIM;YWHAE;FHL2;CD59;MAPK1;PLEC;RPL6;NUP214;PALLD;NCKAP1;ENAH;MAPRE1
GO:0030055	cell-substrate junction	411	40	6.68027	5.98778	0	0	ITGA2;LAP3;ERBIN;PEAK1;ENG;YWHAB;CALR;PI4KA;SCARB2;TGM2;PDLIM1;PDIA3;ACTN2;GNB2;ITGA11;HSPA1A;CD81;ADAM10;HYOU1;HSP90B1;HSPA5;RRAS;CTTN;ANXA5;GSN;P4HB;ALCAM;ITGA5;VIM;YWHAE;FHL2;CD59;MAPK1;PLEC;RPL6;NUP214;PALLD;NCKAP1;ENAH;MAPRE1
GO:0005788	endoplasmic reticulum lumen	306	30	4.97363	6.03181	2.88658e-15	4.23966e-13	FSTL1;ALB;FBN1;FN1;CALR;COL1A2;ERP29;COL1A1;PDIA3;THBS1;P4HA1;RCN3;PDIA6;PRKCSH;FKBP10;ADAM10;HYOU1;DNAJB11;HSP90B1;HSPA5;P4HA2;P4HB;CRTAP;CANX;PDIA4;SERPINH1;RCN1;ERO1A;COL6A3;CHGB
GO:0042470	melanosome	105	15	1.70664	8.78921	1.51857e-10	1.27452e-08	YWHAB;ERP29;PDIA3;PDIA6;ATP1A1;HSP90AB1;ANXA11;HSP90B1;HSPA5;P4HB;CANX;PDIA4;YWHAE;CTSD;SLC3A2
GO:0048770	pigment granule	105	15	1.70664	8.78921	1.51857e-10	1.27452e-08	YWHAB;ERP29;PDIA3;PDIA6;ATP1A1;HSP90AB1;ANXA11;HSP90B1;HSPA5;P4HB;CANX;PDIA4;YWHAE;CTSD;SLC3A2

## Sheet: s3-MF
geneSet	description	size	overlap	expect	enrichmentRatio	pValue	FDR	userId
GO:0008144	drug binding	1707	69	32.7659	2.10585	1.41804e-09	2.21805e-07	HBB;OAS3;KDR;DNAH14;ALB;PEAK1;CHD7;PI4KA;PIK3C2A;MYO1E;DNAH6;SETX;DDX60;TAF1;EIF2AK2;NLRC4;PAK3;MAP2K3;PGK1;WARS;PIKFYVE;NOS2;PAICS;FKBP10;HSPA1A;ATP1A1;HSP90AB1;KIF15;HYOU1;NLRP14;HSP90B1;SLFN5;HSPA5;HNRNPU;PKM;ADGB;MAT2A;ATP2A2;CAD;DNAH10;DNAH1;CHD9;MTHFD1;QARS;KIF5B;ALDH18A1;LARS;KARS;MAPK1;OAT;ROCK1;OLA1;NME1;DARS;PAK2;RYR1;SPATA5L1;DYNC2H1;RUVBL2;CAMK2D;MYO1B;CTPS1;PRPS1;KALRN;MYO15B;PIK3C2B…
GO:0003723	RNA binding	1603	66	30.7696	2.14497	1.68438e-09	2.43198e-07	OAS3;IFIT3;S100A4;MTCL1;MATR3;NOP56;CALR;DDX60;EIF3E;SRSF1;MAP4;EIF2AK2;WRAP53;TXN;PDIA3;SFPQ;PABPC3;HSPA1A;NAP1L4;HSP90AB1;NQO1;ANXA11;HSP90B1;HNRNPCL1;HNRNPU;YBX1;FUS;PKM;P4HB;EFTUD2;HNRNPR;SERBP1;VIM;STIP1;CANX;C1QBP;PDIA4;YWHAE;DSP;TAF15;EEF1B2;SERPINH1;HNRNPH1;PSMA6;SLC3A2;ADAR;CSDE1;ALDH18A1;KARS;PLEC;IPO5;SLC25A5;SSB;UBR5;FAU;NME1;RPL6;SAMHD1;DARS;EIF3C;GOLGB1;RPS24;SRRM2;S100A16;MAPRE1;PR…
GO:0032555	purine ribonucleotide binding	1850	77	35.5108	2.16836	2.81855e-11	7.55773e-09	MX1;OAS3;KDR;DNAH14;PEAK1;CHD7;PI4KA;PIK3C2A;MYO1E;DNAH6;SETX;DDX60;TAF1;EIF2AK2;NLRC4;TGM2;ADSS;PAK3;MAP2K3;PGK1;WARS;GNAI2;PIKFYVE;PAICS;HSPA1A;ATP1A1;HSP90AB1;KIF15;HYOU1;NLRP14;HSP90B1;SLFN5;HSPA5;HNRNPU;RRAS;PKM;EFTUD2;NIN;MAT2A;ATP2A2;CAD;DNAH10;DNAH1;CHD9;MTHFD1;QARS;KIF5B;ALDH18A1;RAB14;LARS;KARS;MAPK1;ROCK1;OLA1;NME1;SAMHD1;TUBB3;DARS;PAK2;GNAI1;RYR1;SPATA5L1;DYNC2H1;RUVBL2;RAB3B;CAMK2D;…
GO:0032559	adenyl ribonucleotide binding	1509	63	28.9653	2.17502	2.51593e-09	3.37315e-07	OAS3;KDR;DNAH14;PEAK1;CHD7;PI4KA;PIK3C2A;MYO1E;DNAH6;SETX;DDX60;TAF1;EIF2AK2;NLRC4;PAK3;MAP2K3;PGK1;WARS;PIKFYVE;PAICS;HSPA1A;ATP1A1;HSP90AB1;KIF15;HYOU1;NLRP14;HSP90B1;SLFN5;HSPA5;HNRNPU;PKM;MAT2A;ATP2A2;CAD;DNAH10;DNAH1;CHD9;MTHFD1;QARS;KIF5B;ALDH18A1;LARS;KARS;MAPK1;ROCK1;OLA1;NME1;DARS;PAK2;RYR1;SPATA5L1;DYNC2H1;RUVBL2;CAMK2D;MYO1B;CTPS1;PRPS1;KALRN;MYO15B;PIK3C2B;PRPS2;GUCY2C;PRPF4B
GO:0017076	purine nucleotide binding	1865	78	35.7987	2.17885	1.57971e-11	4.94187e-09	MX1;OAS3;KDR;DNAH14;PEAK1;CHD7;PI4KA;PIK3C2A;MYO1E;DNAH6;SETX;DDX60;TAF1;EIF2AK2;NLRC4;TGM2;ADSS;PAK3;MAP2K3;PGK1;WARS;GNAI2;PIKFYVE;BAG2;PAICS;HSPA1A;ATP1A1;HSP90AB1;KIF15;HYOU1;NLRP14;HSP90B1;SLFN5;HSPA5;HNRNPU;RRAS;PKM;EFTUD2;NIN;MAT2A;ATP2A2;CAD;DNAH10;DNAH1;CHD9;MTHFD1;QARS;KIF5B;ALDH18A1;RAB14;LARS;KARS;MAPK1;ROCK1;OLA1;NME1;SAMHD1;TUBB3;DARS;PAK2;GNAI1;RYR1;SPATA5L1;DYNC2H1;RUVBL2;RAB3B;CA…
GO:0030554	adenyl nucleotide binding	1522	64	29.2148	2.19067	1.36744e-09	2.21805e-07	OAS3;KDR;DNAH14;PEAK1;CHD7;PI4KA;PIK3C2A;MYO1E;DNAH6;SETX;DDX60;TAF1;EIF2AK2;NLRC4;PAK3;MAP2K3;PGK1;WARS;PIKFYVE;BAG2;PAICS;HSPA1A;ATP1A1;HSP90AB1;KIF15;HYOU1;NLRP14;HSP90B1;SLFN5;HSPA5;HNRNPU;PKM;MAT2A;ATP2A2;CAD;DNAH10;DNAH1;CHD9;MTHFD1;QARS;KIF5B;ALDH18A1;LARS;KARS;MAPK1;ROCK1;OLA1;NME1;DARS;PAK2;RYR1;SPATA5L1;DYNC2H1;RUVBL2;CAMK2D;MYO1B;CTPS1;PRPS1;KALRN;MYO15B;PIK3C2B;PRPS2;GUCY2C;PRPF4B
GO:0032553	ribonucleotide binding	1865	79	35.7987	2.20678	5.87841e-12	2.20675e-09	MX1;OAS3;KDR;DNAH14;PEAK1;CHD7;PI4KA;PIK3C2A;MYO1E;DNAH6;SETX;DDX60;TAF1;EIF2AK2;NLRC4;TGM2;ADSS;PAK3;MAP2K3;PGK1;WARS;GNAI2;PIKFYVE;NOS2;PAICS;HSPA1A;ATP1A1;HSP90AB1;KIF15;HYOU1;UGP2;NLRP14;HSP90B1;SLFN5;HSPA5;HNRNPU;RRAS;PKM;EFTUD2;NIN;MAT2A;ATP2A2;CAD;DNAH10;DNAH1;CHD9;MTHFD1;QARS;KIF5B;ALDH18A1;RAB14;LARS;KARS;MAPK1;ROCK1;OLA1;NME1;SAMHD1;TUBB3;DARS;PAK2;GNAI1;RYR1;SPATA5L1;DYNC2H1;RUVBL2;RAB…
GO:0005524	ATP binding	1453	63	27.8903	2.25885	5.59172e-10	1.04957e-07	OAS3;KDR;DNAH14;PEAK1;CHD7;PI4KA;PIK3C2A;MYO1E;DNAH6;SETX;DDX60;TAF1;EIF2AK2;NLRC4;PAK3;MAP2K3;PGK1;WARS;PIKFYVE;PAICS;HSPA1A;ATP1A1;HSP90AB1;KIF15;HYOU1;NLRP14;HSP90B1;SLFN5;HSPA5;HNRNPU;PKM;MAT2A;ATP2A2;CAD;DNAH10;DNAH1;CHD9;MTHFD1;QARS;KIF5B;ALDH18A1;LARS;KARS;MAPK1;ROCK1;OLA1;NME1;DARS;PAK2;RYR1;SPATA5L1;DYNC2H1;RUVBL2;CAMK2D;MYO1B;CTPS1;PRPS1;KALRN;MYO15B;PIK3C2B;PRPS2;GUCY2C;PRPF4B
GO:0035639	purine ribonucleoside triphosphate binding	1786	78	34.2823	2.27523	1.78679e-12	8.38453e-10	MX1;OAS3;KDR;DNAH14;PEAK1;CHD7;PI4KA;PIK3C2A;MYO1E;DNAH6;SETX;DDX60;TAF1;EIF2AK2;NLRC4;TGM2;ADSS;PAK3;MAP2K3;PGK1;WARS;GNAI2;PIKFYVE;PAICS;HSPA1A;ATP1A1;HSP90AB1;KIF15;HYOU1;NLRP14;HSP90B1;SLFN5;HSPA5;HNRNPU;RRAS;PKM;EFTUD2;NIN;MAT2A;ATP2A2;CAD;DNAH10;DNAH1;PSMA6;CHD9;MTHFD1;QARS;KIF5B;ALDH18A1;RAB14;LARS;KARS;MAPK1;ROCK1;OLA1;NME1;SAMHD1;TUBB3;DARS;PAK2;GNAI1;RYR1;SPATA5L1;DYNC2H1;RUVBL2;RAB3B;C…
GO:0042802	identical protein binding	1696	84	32.5547	2.58027	1.11022e-16	1.04194e-13	MX1;IFIT3;KDR;S100A4;DES;ALB;MTCL1;PEAK1;FBN1;GRAMD2B;FN1;ENG;STAT1;MATR3;YWHAB;PSME2;COL1A2;TPM2;ERP29;SGTA;CENPF;SNX6;SETX;SCARB2;EIF2AK2;NLRC4;WRAP53;COL1A1;PDIA3;THBS1;P4HA1;SFPQ;DPYSL2;WARS;ACTN2;PRDX6;NOS2;BAG2;SDK1;PAICS;HSP90AB1;NQO1;ADAM10;UGP2;PML;HNRNPU;TKT;SH3GL1;TPI1;CTNNA2;FUS;PKM;CDH9;ALCAM;MCM10;SOD1;MAT2A;CAD;VIM;YWHAE;FHL2;KIF5B;ALDH18A1;KARS;CDH6;MAPK1;SSB;NME1;SAMHD1;PAK2;RUVB…
GO:0044877	protein-containing complex binding	1062	54	20.3851	2.64899	3.94311e-11	9.25153e-09	ITGA2;KDR;HLA-E;FBN1;FN1;ENG;YWHAB;SCIN;CALR;TPM2;SGTA;CENPF;MYO1E;WRAP53;THBS1;ACTN2;GNAI2;GNB2;MS4A1;ITGA11;NAP1L4;HSP90AB1;CD81;ADAM10;ANXA11;SPTB;HSPA5;HNRNPU;RRAS;TPM3;CTNNA2;GSN;PKM;P4HB;ITGA5;AP2B1;PLS1;NES;VIM;C1QBP;YWHAE;CLTA;SERPINH1;DCTN1;OLA1;NME1;GNAI1;IRS4;DOCK2;RUVBL2;NEB;MYO1B;CRYAB;MYOM1
GO:0008092	cytoskeletal protein binding	940	50	18.0433	2.77111	4.80125e-11	1.00133e-08	MX1;IQGAP3;DYSF;S100A4;DES;MTCL1;SCIN;TPM2;SNX6;MYO1E;HSPB7;MAP4;FMNL2;DPYSL2;ACTN2;ALMS1;BAG2;ATP1A1;HSP90AB1;KIF15;SPTB;COBL;ALDOC;HNRNPU;TPM3;CTNNA2;GSN;FUS;CDH9;PLS1;STMN2;KIF5B;RAB14;DCTN1;CDH6;ABRAXAS2;PLEC;ROCK1;NME1;PALLD;RAB3B;CRMP1;NEB;CAMK2D;MYO1B;CRYAB;EML6;MYOM1;ENAH;MAPRE1
GO:0050839	cell adhesion molecule binding	478	46	9.17521	5.01351	0	0	ITGA2;KDR;FBN1;FN1;STAT1;YWHAB;NOP56;CALR;CTNND1;PI4KA;EIF3E;FMNL2;PDLIM1;THBS1;ACTN2;PRDX6;ARHGEF16;PAICS;HSPA1A;HSP90AB1;CD81;ADAM10;FAM129B;HSPA5;SH3GL1;CTTN;CTNNA2;PKM;CDH9;P4HB;RANBP1;ITGA5;SERBP1;EPS15L1;YWHAE;DSP;CHMP5;SLC3A2;KIF5B;CDH6;PLEC;OLA1;RPL6;PAK2;MYO1B;MAPRE1
GO:0045296	cadherin binding	315	34	6.04643	5.62315	2.22045e-16	1.38926e-13	STAT1;YWHAB;NOP56;CTNND1;PI4KA;EIF3E;FMNL2;PDLIM1;PRDX6;ARHGEF16;PAICS;HSPA1A;HSP90AB1;FAM129B;HSPA5;SH3GL1;CTTN;CTNNA2;PKM;CDH9;RANBP1;SERBP1;EPS15L1;YWHAE;CHMP5;SLC3A2;KIF5B;CDH6;PLEC;OLA1;RPL6;PAK2;MYO1B;MAPRE1
GO:0023026	MHC class II protein complex binding	15	6	0.287925	20.8388	2.06483e-07	2.4223e-05	MS4A1;HSP90AB1;CD81;ANXA11;PKM;YWHAE

## Sheet: s4-KEGG
geneSet	description	size	overlap	expect	enrichmentRatio	pValue	FDR	userId
hsa04510	Focal adhesion	199	13	5.43527	2.39179	0.00305901	0.0667982	ITGA2;KDR;FN1;COL1A2;COL1A1;THBS1;PAK3;ITGA11;ITGA5;MAPK1;ROCK1;PAK2;COL6A3
hsa04810	Regulation of actin cytoskeleton	213	15	5.81765	2.57836	0.000695469	0.0251914	ITGA2;IQGAP3;FN1;SCIN;PAK3;PIKFYVE;ITGA11;RRAS;GSN;ITGA5;MAPK1;ROCK1;PAK2;NCKAP1;ENAH
hsa05016	Huntington disease	193	14	5.27139	2.65585	0.000782853	0.025521	DNAH14;ITPR1;DNAH6;TGM2;SOD1;AP2B1;DNAH10;CLTA;DNAH1;CLTCL1;DCTN1;SLC25A5;CYCS;SDHA
hsa05414	Dilated cardiomyopathy (DCM)	90	8	2.45816	3.25447	0.00307354	0.0667982	ITGA2;DES;TPM2;ITGA11;TPM3;LMNA;ITGA5;ATP2A2
hsa05410	Hypertrophic cardiomyopathy (HCM)	83	8	2.26697	3.52894	0.00183958	0.0499752	ITGA2;DES;TPM2;ITGA11;TPM3;LMNA;ITGA5;ATP2A2
hsa04512	ECM-receptor interaction	82	8	2.23966	3.57198	0.00170132	0.0499752	ITGA2;FN1;COL1A2;COL1A1;THBS1;ITGA11;ITGA5;COL6A3
hsa01200	Carbon metabolism	116	12	3.1683	3.78753	7.08446e-05	0.00769845	PGD;PGK1;PGAM4;PGAM1;ALDOC;TKT;TPI1;PKM;PRPS1;SDHA;PHGDH;PRPS2
hsa04612	Antigen processing and presentation	77	9	2.10309	4.27941	0.000228973	0.0124409	HLA-E;CALR;PSME2;PDIA3;HSPA1A;HSP90AB1;HSPA5;PSME1;CANX
hsa00010	Glycolysis / Gluconeogenesis	68	8	1.85728	4.30738	0.000488728	0.0199156	PGM2;PGK1;ALDH7A1;PGAM4;PGAM1;ALDOC;TPI1;PKM
hsa05412	Arrhythmogenic right ventricular cardiomyopathy	72	9	1.96653	4.57659	0.000135908	0.00886123	ITGA2;DES;ACTN2;ITGA11;CTNNA2;LMNA;ITGA5;ATP2A2;DSP
hsa04141	Protein processing in endoplasmic reticulum	165	22	4.50663	4.8817	5.29379e-10	1.72578e-07	CALR;ERP29;EIF2AK2;PDIA3;PDIA6;PRKCSH;BAG2;HSPA1A;HSP90AB1;HYOU1;DNAJB11;HSP90B1;HSPA5;P4HB;LMAN2;SSR4;CANX;PDIA4;STT3A;CRYAB;SAR1A;ERO1A
hsa00330	Arginine and proline metabolism	50	7	1.36564	5.12578	0.00037693	0.0175542	LAP3;P4HA1;ALDH7A1;NOS2;P4HA2;ALDH18A1;OAT
hsa05020	Prion diseases	35	5	0.955951	5.23039	0.00241024	0.0604414	HSPA1A;HSPA5;SOD1;STIP1;MAPK1
hsa01230	Biosynthesis of amino acids	75	12	2.04847	5.85804	7.18763e-07	0.000117158	PGK1;PGAM4;PGAM1;ALDOC;TKT;TPI1;PKM;MAT2A;ALDH18A1;PRPS1;PHGDH;PRPS2
hsa00030	Pentose phosphate pathway	30	6	0.819387	7.32255	0.000132369	0.00886123	PGM2;PGD;ALDOC;TKT;PRPS1;PRPS2

## Sheet: s5-PANTHER
geneSet	description	size	overlap	expect	enrichmentRatio	pValue	FDR	userId
P00021	FGF signaling pathway	104	7	3.71756	1.88295	0.0748959	0.630116	RASA2;YWHAB;PIK3C2A;MAP2K3;YWHAE;MAPK1;PIK3C2B
P04393	Ras Pathway	70	5	2.50221	1.99824	0.102229	0.630116	STAT1;PAK3;MAP2K3;MAPK1;PAK2
P00034	Integrin signalling pathway	166	12	5.9338	2.02231	0.013132	0.49464	ITGA2;FN1;COL1A2;PIK3C2A;COL1A1;MAP2K3;ACTN2;ITGA11;RRAS;ITGA5;COL6A3;PIK3C2B
P00018	EGF receptor signaling pathway	115	9	4.11077	2.18937	0.0194767	0.550216	RASA2;STAT1;YWHAB;PIK3C2A;MAP2K3;RRAS;YWHAE;MAPK1;PIK3C2B
P00049	Parkinson disease	89	7	3.18138	2.20031	0.0372162	0.600776	YWHAB;HSPA1A;PSMA4;HSPA5;YWHAE;PSMA6;MAPK1
P00056	VEGF signaling pathway	62	5	2.21624	2.25607	0.0679853	0.630116	KDR;PIK3C2A;MAPK1;CRYAB;PIK3C2B
P00020	FAS signaling pathway	31	3	1.10812	2.70729	0.0965882	0.630116	SCIN;GSN;LMNA
P00032	Insulin/IGF pathway-mitogen activated protein kinase kinase/MAP kinase cascade	29	3	1.03663	2.894	0.0825547	0.630116	MAP2K3;MAPK1;IRS4
P02738	De novo purine biosynthesis	28	3	1.00088	2.99735	0.0758991	0.630116	ADSS;NME1;DSCAML1
P00033	Insulin/IGF pathway-protein kinase B signaling cascade	35	4	1.2511	3.19718	0.0341756	0.600776	PIK3C2A;IRS4;TSC2;PIK3C2B
P00030	Hypoxia response via HIF activation	26	3	0.929391	3.22792	0.0633528	0.630116	PIK3C2A;TXN;PIK3C2B
P02739	De novo pyrimidine deoxyribonucleotide biosynthesis	13	2	0.464695	4.30389	0.0762843	0.630116	NME1;DSCAML1
P00024	Glycolysis	17	4	0.607679	6.58243	0.00252867	0.14287	PGK1;PGAM4;TPI1;PKM
P02762	Pentose phosphate pathway	8	2	0.285966	6.99383	0.0307246	0.600776	PGD;TKT
P02740	De novo pyrimidine ribonucleotides biosythesis	11	4	0.393204	10.1728	0.000413231	0.0466951	CAD;NME1;CTPS1;DSCAML1

## Sheet: s6-REACTOME
geneSet	description	size	overlap	expect	enrichmentRatio	pValue	FDR	userId
R-HSA-8953897	Cellular responses to external stimuli	503	27	12.0102	2.24808	6.69608e-05	0.00750103	PSME2;TXN;MAP2K3;PRDX6;BAG2;HSPA1A;HSP90AB1;PSMA4;HSPA5;PSME1;P4HB;SOD1;STIP1;YWHAE;PSMA6;DCTN1;MAPK1;TUBB3;NUP214;CAMK2D;CRYAB;PSMD2;CYCS;ERO1A;ATG4C;TUBAL3;TSC2
R-HSA-422475	Axon guidance	551	30	13.1563	2.28027	1.96188e-05	0.00423766	ITGA2;NGEF;PSME2;PAK3;DPYSL2;HSP90AB1;ADAM10;SPTB;PSMA4;PSME1;RRAS;ALCAM;ITGA5;AP2B1;CLTA;PSMA6;CLTCL1;MAPK1;ROCK1;RPL6;TUBB3;PAK2;CRMP1;PSMD2;RPS24;KALRN;COL6A3;TUBAL3;ENAH;DSCAML1
R-HSA-9006934	Signaling by Receptor Tyrosine Kinases	455	26	10.8641	2.3932	3.23515e-05	0.00497051	ITGA2;KDR;ERBIN;FN1;STAT1;YWHAB;COL1A2;CTNND1;ITPR1;COL1A1;THBS1;PAK3;ADAM10;SH3GL1;PCSK5;AP2B1;EPS15L1;CLTA;HNRNPH1;MAPK1;ROCK1;PAK2;IRS4;NCKAP1;COL6A3;STAM2
R-HSA-2262752	Cellular responses to stress	426	25	10.1717	2.4578	2.97753e-05	0.00497051	PSME2;TXN;MAP2K3;PRDX6;BAG2;HSPA1A;HSP90AB1;PSMA4;HSPA5;PSME1;P4HB;SOD1;STIP1;YWHAE;PSMA6;DCTN1;MAPK1;TUBB3;NUP214;CAMK2D;CRYAB;PSMD2;CYCS;ERO1A;TUBAL3
R-HSA-1474244	Extracellular matrix organization	301	20	7.18704	2.78279	3.45174e-05	0.00497051	ITGA2;KDR;SH3PXD2A;FBN1;FN1;COL1A2;COL1A1;THBS1;P4HA1;ITGA11;ADAM10;P4HA2;P4HB;ITGA5;CRTAP;CTSD;SERPINH1;PLEC;LOXL2;COL6A3
R-HSA-5663205	Infectious disease	382	28	9.12109	3.06981	1.17113e-07	0.000202371	CALR;PSME2;CTNND1;TAF1;EIF2AK2;MAP2K3;HSPA1A;HSP90AB1;PSMA4;PSME1;SH3GL1;RANBP1;AP2B1;CANX;CLTA;TAF15;PSMA6;CHMP5;IPO5;SLC25A5;RPL6;PAK2;NUP214;DOCK2;PSMD2;RPS24;STAM2;GUCY2C
R-HSA-453274	Mitotic G2-G2/M phases	196	16	4.67993	3.41885	1.81186e-05	0.00423766	CEP192;CEP152;PSME2;CENPF;CEP250;ALMS1;HSP90AB1;PSMA4;PSME1;YWHAE;PSMA6;DCTN1;TUBB3;PSMD2;TUBAL3;MAPRE1
R-HSA-69275	G2/M Transition	194	16	4.63218	3.4541	1.59385e-05	0.00423766	CEP192;CEP152;PSME2;CENPF;CEP250;ALMS1;HSP90AB1;PSMA4;PSME1;YWHAE;PSMA6;DCTN1;TUBB3;PSMD2;TUBAL3;MAPRE1
R-HSA-5357801	Programmed Cell Death	172	15	4.10688	3.65241	1.51753e-05	0.00423766	YWHAB;PSME2;PSMA4;PSME1;GSN;LMNA;VIM;YWHAE;DSP;PSMA6;PLEC;ROCK1;PAK2;PSMD2;CYCS
R-HSA-109581	Apoptosis	169	15	4.03525	3.71724	1.22805e-05	0.00423766	YWHAB;PSME2;PSMA4;PSME1;GSN;LMNA;VIM;YWHAE;DSP;PSMA6;PLEC;ROCK1;PAK2;PSMD2;CYCS
R-HSA-8957275	Post-translational protein phosphorylation	108	11	2.57874	4.26565	5.16493e-05	0.0066459	FSTL1;ALB;FBN1;FN1;PDIA6;PRKCSH;ADAM10;HSP90B1;P4HB;RCN1;CHGB
R-HSA-1474290	Collagen formation	90	10	2.14895	4.65344	5.38441e-05	0.0066459	COL1A2;COL1A1;P4HA1;P4HA2;P4HB;CRTAP;SERPINH1;PLEC;LOXL2;COL6A3
R-HSA-216083	Integrin cell surface interactions	85	10	2.02956	4.92717	3.26961e-05	0.00497051	ITGA2;KDR;FBN1;FN1;COL1A2;COL1A1;THBS1;ITGA11;ITGA5;COL6A3
R-HSA-2173782	Binding and Uptake of Ligands by Scavenger Receptors	42	8	1.00284	7.97732	5.52575e-06	0.00423766	HBB;HBA2;ALB;CALR;COL1A2;COL1A1;HYOU1;HSP90B1
R-HSA-71336	Pentose phosphate pathway	15	5	0.358158	13.9603	1.84146e-05	0.00423766	PGM2;PGD;TKT;PRPS1;PRPS2

## Sheet: s7-diseases
geneSet	description	size	overlap	expect	enrichmentRatio	pValue	FDR	database	userId
C1846707	SPINOCEREBELLAR ATAXIA 17	9	5	0.137437	36.3803	9.64803e-08	4.4057e-05	disease_Disgenet	PDIA3;NQO1;HYOU1;HSPA5;P4HB
C1301959	Bulbar weakness	19	7	0.290145	24.1259	7.8117e-09	7.13431e-06	disease_Disgenet	DES;MATR3;TPM2;TPM3;GSN;RYR1;NEB
C4082299	Bulbar palsy	19	7	0.290145	24.1259	7.8117e-09	7.13431e-06	disease_Disgenet	DES;MATR3;TPM2;TPM3;GSN;RYR1;NEB
C0240479	Neck muscle weakness	17	6	0.259604	23.1122	1.30018e-07	5.54137e-05	disease_Disgenet	DES;TPM2;TPM3;GFPT1;LMNA;CRYAB
C3806467	Respiratory insufficiency due to muscle weakness	37	11	0.565019	19.4684	5.33196e-12	1.13624e-08	disease_Disgenet	DES;MATR3;TPM2;TPM3;TPI1;GFPT1;LMNA;RYR1;NEB;CRYAB;COL6A3
C0427065	Distal muscle weakness	62	10	0.946789	10.562	3.19395e-08	2.26877e-05	disease_Disgenet	DYSF;DES;MATR3;SETX;LMNA;DCTN1;CRYAB;PRPS1;COL6A3;NAGA
C1864696	Distal limb muscle weakness due to peripheral neuropathy	62	10	0.946789	10.562	3.19395e-08	2.26877e-05	disease_Disgenet	DYSF;DES;MATR3;SETX;LMNA;DCTN1;CRYAB;PRPS1;COL6A3;NAGA
C0007193	Cardiomyopathy, Dilated	83	11	1.26748	8.67866	5.38964e-08	3.35828e-05	disease_Disgenet	DES;TPM2;ACTN2;ALMS1;TPM3;LMNA;DSP;FHL2;RYR1;CRYAB;SDHA
C0232466	Feeding difficulties	127	13	1.93939	6.70313	7.70753e-08	4.10619e-05	disease_Disgenet	HBB;FBN1;TPM2;CHD7;TPM3;GFPT1;EFTUD2;LMNA;SSR4;STT3A;ALDH18A1;RYR1;NEB
PA445644	Shock	367	29	5.60438	5.17452	5.17142e-13	3.25037e-09	disease_GLAD4U	DES;CALR;ERP29;SGTA;HSPB7;EIF2AK2;PDIA3;PDIA6;BAG2;FKBP10;HSPA1A;HSP90AB1;HYOU1;DNAJB11;HSP90B1;HSPA5;YBX1;PKM;P4HB;SOD1;STIP1;CANX;PDIA4;SERPINH1;RCN1;CSDE1;RUVBL2;CRYAB;PSMD2
PA445752	Stress	643	38	9.81912	3.87	1.01685e-12	3.25037e-09	disease_GLAD4U	ALB;ERP29;OXR1;EIF2AK2;TGM2;TXN;PDIA3;MAP2K3;PRDX6;NOS2;BAG2;HSPA1A;HSP90AB1;NQO1;HYOU1;DNAJB11;PML;HSP90B1;HSPA5;HNRNPU;YBX1;FUS;GSTO1;LMNA;SOD1;STIP1;CANX;YWHAE;HNRNPH1;MAPK1;SLC25A5;ROCK1;OLA1;OXTR;PALLD;CRYAB;ERO1A;GLO1
PA446295	Lentivirus Infections	498	26	7.60486	3.41887	5.77836e-08	3.35828e-05	disease_GLAD4U	HLA-E;STAT1;MATR3;PSME2;PIK3C2A;MAP4;PDIA3;PDIA6;CD81;PSMA4;PSME1;PDIA4;PSMA6;ADAR;CD59;KARS;MAPK1;IPO5;SAMHD1;TUBB3;PAK2;GOLGB1;PSMD2;CYCS;RSAD2;PIK3C2B
PA447230	HIV	862	42	13.1634	3.19066	3.13083e-11	4.00308e-08	disease_GLAD4U	MX1;IFIT3;HLA-E;STAT1;MATR3;PSME2;SGTA;PIK3C2A;TAF1;SRSF1;EIF2AK2;PDIA3;PDIA6;HSPA1A;CD81;PSMA4;PSME1;P4HB;PCSK5;AP2B1;VIM;CANX;C1QBP;PDIA4;CLTA;TAF15;PSMA6;CHMP5;ADAR;CD59;KARS;MAPK1;IPO5;SAMHD1;TUBB3;PAK2;NUP214;DOCK2;PSMD2;CYCS;RSAD2;PIK3C2B
PA443275	Adhesion	766	33	11.6974	2.82113	9.08032e-08	4.4057e-05	disease_GLAD4U	ITGA2;KDR;FN1;ENG;CTNND1;TGM2;THBS1;PAK3;ITGA11;SDK1;CD81;ADAM10;RRAS;CTTN;CTNNA2;CDH9;ALCAM;ITGA5;VIM;DSP;FHL2;SLC3A2;CDH6;MAPK1;PLEC;LOXL2;ROCK1;NME1;DOCK2;PALLD;ENAH;SVEP1;DSCAML1
C4020899	Autosomal recessive predisposition	1445	58	22.0663	2.62844	1.02656e-11	1.64069e-08	disease_Disgenet	HBB;DYSF;DES;ALB;STAT1;CEP152;COL1A2;ITPR1;TPM2;DLEC1;CENPF;MYO1E;NKX3-2;SETX;SCARB2;C2CD3;WRAP53;COL1A1;NANS;ALDH7A1;ALMS1;MS4A1;TRIM2;CD81;TPM3;TPI1;GFPT1;EFTUD2;LMNA;SOD1;NIN;CRTAP;CAD;PCLO;DSP;STT3A;CTSD;SERPINH1;QARS;ADAR;ALDH18A1;CD59;LARS;KARS;OAT;PLEC;SAMHD1;DARS;RYR1;DOCK2;NEB;CTPS1;CRYAB;COL6A3;SDHA;PHGDH;NAGA;GUCY2C

## Sheet: s8-GeneAnalytics
Score	Disease	#Matched genes (Total Genes)	Genes
			Diferentially Expressed (DE)	Genetic association	GeneCards inferred
26.95	Amyotrophic Lateral Sclerosis 1	33(659)	2: skeletal muscle FAT3, S100A10	7 Causative mutation: ANXA11, DCTN1, FUS, MATR3, SETX, SOD1, TAF15	31: ANXA11, DCTN1, FUS, MATR3, SETX, SOD1, TAF15, ACTN2, ADAR, ALB, ATP5PF, CANX, CBR1, CRYAB, CTSD, CYCS, DPYSL2, EIF2AK2, GLO1, HNRNPH1, HSPA5, ITPR1, NES, NOP56, P4HB, PHGDH, SFPQ, STMN2, TGM2, TPM2, TXN
26.14	Retinitis Pigmentosa	37 (1018)		2 Causative mutation: ALMS1, DYNC2H1	37: ALMS1, DYNC2H1, ALB, ALDH7A1, ANXA5, C2CD3, CALR, CANX, CEP250, CHD7, CTSD, CYCS, DCTN1, EFTUD2, FN1, FUS, GLO1, GSN, HBB, HNRNPH1, HSP90B1, HSPA5, KDR, LMNA, NES, OAT, OTOA, P4HB, PHGDH, PRPS1, SOD1, SRSF1, TPM3, TXN, WDR19, YWHAE, ZNF841
23.48	Nervous Systems Disease	30 (950)		5 Causative mutation: ALDH18A1, ALDH7A1, MCPH1, TSC2,WDR62	30: ALDH18A1, ALDH7A1, MCPH1, TSC2,WDR62, ADAM10, AKR1B1, ALB, ANXA5, CANX, CCN2, CTSD, CYCS, ENG, FN1, FUS, HSPA5, ITPR1, KDR, LMNA, MAPK1, NES, NOS2, NQO1, SCARB2, SOD1, STAT1, THBS1, TXN, VIM
23.31	Dilated Cardiomyopathy	28(454)		4 Causative mutation: ACTN2, DES, DSP, LMNA	28:ACTN2, DES, DSP, LMNA,ALB, ALMS1, ATP2A2, CALR, CAMK2D, CCN2, COL1A1, COL1A2, CRYAB, CTSD, CYCS, DYSF, FBN1, FHL2, FN1, HSPB7, MYOM1, NEB, PIK3C2A, PLEC, RYR1, SLC25A5, TPM2, TXN
22.49	Congenital Nervous System Abnormality	27(588)		5 Causative mutation: ALDH18A1, ALDH7A1, MCPH1, TSC2,WDR62	27: ALDH18A1, ALDH7A1, MCPH1, TSC2,WDR62, ADAR, ALB, C2CD3, CDK5RAP2, CENPF, CEP152, CEP192, CHD7, DCTN1, DYNC2H1, EFTUD2, FAT4, HNRNPU, KARS1, KIF5C, KNL1, LMNA, NES, NIN, PHGDH, SAMHD1, YWHAE
21.49	Myopathy	25(413)		4 Causative mutation: COL6A3, PLEC, RYR1, TPM3	25: COL6A3, PLEC, RYR1, TPM3, ACTN2, ADSS1, ALB, C1QBP, CRYAB, CYCS, DES, DYSF, FN1, FUS, GSN, LMNA, MATR3, NEB, PGK1, PIK3C2A, SDHA, SOD1, SPTB, TPI1, TPM2
21.1	Alzheimer Disease, Familial, 1	32 (901)	3 DE in brain PI4KA, S100A4, and DES, 4 in blood;DNAH6, CEP152, CRMP1, ITGA11		25: ADAM10, ALB, CALR, CRYAB, CTSD, CYS, DPYSL2, EIF2AK2, FN1, FUS, GLO1, CSN, GSTO1, HSPA1A, HSPA5, MAPK1, NCKAP1, NOS2, NQO1, P4HB, SOD1, STAT1, TGM2, TSC2 and TXN
20.17	Microcephaly	23 (608)		6 Causative mutation: CDK5RAP2, KARS1, MAPK1, PAK3, QARS1, SPATA5L1	30: ALDH18A1, ALDH7A1, MCPH1, TSC2, WDR62, ADAM10, AKR1B1, ALB, ANXA5, CANX, CCN2, CTSD, CYCS, ENG, FN1, FUS, HSPA5, ITPR1, KDR, LMNA, MAPK1, NES, NOS2, NQO1, SCARB2, SOD1, STAT1, THBS1, TXN, VIM
16.85	Hereditary Spastic Paraplegia	24 (467)	13 DE in skeletal muscle: ENAH, SERBP1, SRRM2, YWHAE, BAG2, PRPF4B, AKR7A2, CANX, ERBIN, HERC1, IPO5, SCARB2, UBR5	1 Causative mutation: ALDH18A1	12: ALDH18A1, CANX, DCTN1, FUS, ITPR1, KIF5B, KIF5C, MATR3, REEP5, SETX, SOD1, VPS13D
16.26	Neuromuscular disease	17 (199)		3 Causative mutation: DES, LMNA, RYR1	17: DES, LMNA, RYR1, ACTN2, ALB, CRYAB, DCTN1, DYSF, FUS, GFPT1, KARS1, NEB, PIKFYVE, PLEC, PRPS1, SETX, SOD1
15.59	Muscular Dystrophy, Becker Type	22(216)	20 DE in skeletal muscle: COL1A1, COL1A2, COL6A3, NES, S100A10, S100A4, ASH1L, DPYSL2, FBN1, FN1, MAP4, SRRM2, CALR, CCN2, FSTL1, HLA-E, HNRNPU, LOXL2, SERPINH1, VIM		2: DYSF, PIK3C2A
14.39	Neuroblastoma 1	31 (875)	14 DE in adrenal gland: CRMP1, PAK3, STMN2, BASP1, MAP4, CTNNA2, DSP, KIF5C, MBOAT7, MTCL1, PCLO, PGRMC1, PLS1, TUBB3, 17 DE in blood: C2CD3, CHD7, COL1A1, COL1A2, H1-5, HBA2, IFIT3, MX1, MYT1, OAS3, OXR1, PEAK1, SPATA5L1, SPTB, SVEP1, TGM2, USP31
14.18	Muscular Dystrophy	13 (222)		5 Causative mutation: DYSF, LMNA, NEB, RIF1, RYR1	12: DYSF, LMNA, NEB, RYR1, ACTN2, ASH1L, COL6A3, DES, FN1, KDR, PIK3C2A, PLEC
13.99	Childhood type Dermatomyositis	20(314)	19 DE in skeletal muscle: COL1A2, EIF2AK2, IFIT3, MX1, RSAD2, SAMHD1, STAT1, ADAR, COL1A1, DDX60, HBB, OAS3, ATP2A2, CALR, GFPT1, HLA-E, LAP3, SLFN5, WARS1		2: MX1, PIK3C2A
13.69	Frontotemporal dementia and/or ALS1	19(341)	10 DE: no data found	FUS	10: FUS, ANXA11, DCTN1, HNRNPH1, MATR3, NOP56, SETX, SOD1, STMN2, TAF15
13.28	Eye disease	17(465)		1 Causative mutation: ALMS1	17: ALMS1, AKR1B1, ALB, ANXA5, CCN2, CHD7, CYCS, FBN1, FN1, KDR, NES, OAT, SDHA, STAT1, THBS1, TKT, WDR19
12.89	Huntington disease	19 (430)	12 DE in blood: ADAM10, CHMP5, PIKFYVE, PRPF4B, STAM2, SACM1L, BLTP1, ERBIN, MATR3, OXR1, ROCK1, UBR5		7: ALDH7A1, CYCS, ITPR1, KALRN, SOD1, TAF1, TGM2
12.73	Muscular Dystrophy, Limb-Girdle, Autosomal Recessive 2	15(218)	12 DE in skeletal muscle: COL1A1, COL1A2, NES, S100A10, S100A4, BLTP1, COL6A3, FSTL1, ATP1A1, FBN1, HBB, VIM	2 Causative mutation: DYSF, LMNA	3: DYSF, LMNA, DES
12.61	Muscular Dystrophy-Dystroglycanopathy, Type C, 5	17(168)	16 DE in skeletal muscle: CCN2, COL1A1, COL1A2, MAP4, S100A10, S100A4, COL6A3, HLA-E, NES, STAT1, DPYSL2, FBN1, FN1, FSTL1, VIM, YWHAB		1: DYSF
12.59	Primary Autosomal Recessive Microcephaly	10 (120)		5 Causative mutation: CDK5RAP2, CEP152, KNL1, MCPH1, WDR62	10: CDK5RAP2, CEP152, KNL1, MCPH1, WDR62, CENPF, CEP192, CEP250, FAT4, NIN
