# Supplementary material for: The Proteome Profile of Olfactory Ecto-Mesenchymal Stem Cells-Derived from Patients with Familial Alzheimer’s Disease Reveals New Insights for AD Study
Source: Int J Mol Sci. 2023 Aug 9;24(16):12606. doi: 10.3390/ijms241612606 (PMC10454072; doi:10.3390/ijms241612606)
Supplement: Supplementary file 1 [file ijms-24-12606-s001.zip › Table S4. Measurements by Mass spectrometry P2-C2 (presymptomatic).xlsx]

## Sheet: TOTAL PROTEINS (2)
TOTAL OF PROTEINS QUANTIFIED without unique proteins						1523
TOTAL INJECTIONS (3 CONTROL-CM55, 3 SYMPTOMATIC CARRIER-PM54)						6
TOTAL PEPTIDES						14209
PEPTIDES PER PROTEIN (AVERAGE)						9.33574
													CONTROL								PSEN1 (A431E) PRE-SYMPTOMATIC CARRIER
A0A0U1RQK4	4	1	13.3203	0.0225054	1.64771	0.0165127	2.23672	0.769618	PF44	CF42	213471	[Protein ADP-ribosylarginine] hydrolase-like protein 1 OS=Homo sapiens OX=9606 GN=ADPRHL1 PE=1 SV=1	130.429	77.4919	58.2997	88.7403	1.94812	0.420973	3	1295	196.062	187.98	211.421	198.488	2.29773	0.0599901	11.9073	3	1047	2.23672	1.16139
E9PGM4;Q04446	7	3	34.8526	0.00542678	2.26546	0.00640352	1.84915	0.97788	CF42	PF44	76416.2	1_4-alpha-glucan-branching enzyme OS=Homo sapiens OX=9606 GN=GBE1 PE=1 SV=1	95.584	121.61	101.84	106.345	2.02672	0.127749	3	1240	53.1553	67.8198	51.555	57.51	1.75974	0.155874	8.96431	3	1366	0.540789	-0.886863
P61604;B8ZZL8;S4R3N1;B8ZZ54	3	1	18.3337	0.0056419	2.24857	0.00660309	65.4257	0.975718	PF44	CF42	10931.7	10 kDa heat shock protein_ mitochondrial OS=Homo sapiens OX=9606 GN=HSPE1 PE=1 SV=2			6.98376	6.98376	0.844089	#DIV/0!	1	1515	138.196	125.092	193.629	152.306	2.18272	0.238875	36.382	3	1120	21.8086	4.44682
Q15029;Q15029-2;Q15029-3;K7EP67;K7EJ74	7	2	46.4453	0.0291527	1.53532	0.0200574	1.26289	0.704419	PF44	CF42	110405	116 kDa U5 small nuclear ribonucleoprotein component OS=Homo sapiens OX=9606 GN=EFTUD2 PE=1 SV=1	186.323	147.877	171.35	168.517	2.22664	0.114999	3	1094	213.439	204.107	220.907	212.818	2.32801	0.0395509	8.41713	3	1016	1.26289	0.336727
P31946;P31946-2;A0A0J9YWE8;Q4VY19;Q4VY20;A0A0J9YWZ2	12	5	118.127	0.738124	0.13187	0.212221	1.04194	0.0591529	PF44	CF42	28196.5	14-3-3 protein beta/alpha OS=Homo sapiens OX=9606 GN=YWHAB PE=1 SV=3	631.259	518.428	535.033	561.573	2.74941	0.108478	3	650	502.942	576.829	675.605	585.125	2.76725	0.148054	86.6299	3	641	1.04194	0.059271
P62258;P62258-2;K7EIT4;K7EM20;B4DJF2;I3L3T1	12	8	86.5559	0.00747998	2.1261	0.00805294	1.1597	0.954964	PF44	CF42	29345	14-3-3 protein epsilon OS=Homo sapiens OX=9606 GN=YWHAE PE=1 SV=1	2129.34	2249.77	2309.06	2229.39	3.34819	0.0410778	3	239	2671.58	2515.88	2568.79	2585.42	3.41253	0.030621	79.1681	3	208	1.1597	0.213749
Q04917;A2IDB2	10	1	91.0945	0.0360526	1.44306	0.0231756	1.36458	0.64743	PF44	CF42	28389.9	14-3-3 protein eta OS=Homo sapiens OX=9606 GN=YWHAH PE=1 SV=4	198.667	149.853	156.954	168.492	2.22658	0.156524	3	1095	246.642	235.924	207.195	229.92	2.36158	0.0887151	20.3974	3	988	1.36458	0.448458
P61981	11	3	83.7133	0.000345998	3.46093	0.00109713	1.27264	1	CF42	PF44	28473.7	14-3-3 protein gamma OS=Homo sapiens OX=9606 GN=YWHAG PE=1 SV=2	4421.27	4281.63	4561.5	4421.46	3.64557	0.0316496	3	114	3548.55	3449.96	3424.2	3474.23	3.54086	0.0188914	65.633	3	153	0.785765	-0.347829
P27348;E9PG15;P31947;P31947-2	14	7	136.752	0.0263798	1.57873	0.0186256	1.19272	0.730264	CF42	PF44	28049.4	14-3-3 protein theta OS=Homo sapiens OX=9606 GN=YWHAQ PE=1 SV=1	4208.88	4067.58	3859.24	4045.23	3.60694	0.0434805	3	132	3093.17	3555.13	3526.49	3391.6	3.5304	0.0763183	258.841	3	158	0.838419	-0.254257
P63104;E7EX29;B0AZS6;E7ESK7;P63104-2;H0YB80;B7Z2E6;E5RIR4;E7EVZ2;E9PD24;E5RGE1	19	9	152.888	0.798481	0.0977352	0.225636	1.00695	0.0552965	PF44	CF42	27916.2	14-3-3 protein zeta/delta OS=Homo sapiens OX=9606 GN=YWHAZ PE=1 SV=1	9878.34	9950.58	10079.2	9969.39	3.99867	0.010208	3	53	9974.47	10465.6	9675.91	10038.6	4.00168	0.0397182	398.717	3	58	1.00695	0.00998766
Q9P212;Q9P212-2	2	2	7.2898	0.148678	0.827754	0.0635136	1.45363	0.280225	CF42	PF44	261909	1-phosphatidylinositol 4_5-bisphosphate phosphodiesterase epsilon-1 OS=Homo sapiens OX=9606 GN=PLCE1 PE=1 SV=3	115.683	72.1867	102.206	96.6919	1.98539	0.230281	3	1272	88.923	52.9277	57.7015	66.5174	1.82294	0.29391	19.5501	3	1344	0.687932	-0.539663
A0A087WW66;Q99460;Q99460-2;C9J9M4;H7BZR6	5	1	28.9456	0.396429	0.401834	0.131338	1.12977	0.114974	PF44	CF42	106878	26S proteasome non-ATPase regulatory subunit 1 OS=Homo sapiens OX=9606 GN=PSMD1 PE=1 SV=1	129.924	138.461	112.493	126.959	2.10366	0.10425	3	1193	116.518	166.331	147.455	143.434	2.15665	0.175332	25.1486	3	1146	1.12977	0.176026
O00231;O00231-2;J3QRY4	9	2	45.2283	0.971675	0.0124788	0.262051	1.01838	0.0501014	CF42	PF44	47749	26S proteasome non-ATPase regulatory subunit 11 OS=Homo sapiens OX=9606 GN=PSMD11 PE=1 SV=3	207.997	188.178	277.468	224.547	2.35131	0.208818	3	995	217.432	224.133	219.92	220.495	2.3434	0.0153622	3.38729	3	1005	0.981951	-0.0262764
Q9UNM6;A0A087WUL9;J3KNQ3;Q9UNM6-2;E9PL38;E9PQG3;H0YD73;E9PPD2	7	2	37.967	0.04425	1.35409	0.0268426	1.23081	0.590859	PF44	CF42	43230.7	26S proteasome non-ATPase regulatory subunit 13 OS=Homo sapiens OX=9606 GN=PSMD13 PE=1 SV=2	15907.5	12908.8	15628.7	14815	4.1707	0.111824	3	35	17866.1	17547.5	19289.8	18234.5	4.26089	0.0508776	927.726	3	30	1.23081	0.299612
O00487	1	1	6.3213	0.925039	0.0338401	0.252749	1.01204	0.0507126	CF42	PF44	34748.2	26S proteasome non-ATPase regulatory subunit 14 OS=Homo sapiens OX=9606 GN=PSMD14 PE=1 SV=1	348.627	256.265	253.466	286.119	2.45655	0.189262	3	913	231.921	351.906	264.322	282.716	2.45135	0.219554	62.0714	3	915	0.988105	-0.0172638
Q13200;Q13200-2;Q13200-3;C9JPC0;H7C2Q3;H7C1H2	8	4	48.7368	0.977809	0.00974616	0.263046	1.00299	0.0500622	PF44	CF42	100941	26S proteasome non-ATPase regulatory subunit 2 OS=Homo sapiens OX=9606 GN=PSMD2 PE=1 SV=3	204.223	154.235	197.783	185.414	2.26814	0.146661	3	1062	156.543	194.312	207.048	185.968	2.26944	0.141239	26.2658	3	1064	1.00299	0.00430388
O43242	5	1	26.6818	0.000870935	3.06001	0.00200592	1.41025	0.99999	CF42	PF44	61091.7	26S proteasome non-ATPase regulatory subunit 3 OS=Homo sapiens OX=9606 GN=PSMD3 PE=1 SV=2	506.433	496.313	511.056	504.601	2.70295	0.0149439	3	693	352.445	337.386	383.599	357.81	2.55365	0.0658705	23.5691	3	813	0.709095	-0.495949
H0Y3Y9;P55036;Q5VWC4;H0Y561	2	2	13.0201	0.272633	0.564422	0.0995098	1.13933	0.167212	PF44	CF42	21007.1	26S proteasome non-ATPase regulatory subunit 4 (Fragment) OS=Homo sapiens OX=9606 GN=PSMD4 PE=1 SV=1	301.661	352.111	368.73	340.834	2.53254	0.102478	3	840	329.193	410.253	425.516	388.321	2.58919	0.133322	51.7718	3	788	1.13933	0.188181
Q15008;Q15008-4;C9J7B7;Q15008-2;Q15008-3	3	1	13.3706	0.296698	0.527685	0.106845	1.17387	0.154232	PF44	CF42	45816.6	26S proteasome non-ATPase regulatory subunit 6 OS=Homo sapiens OX=9606 GN=PSMD6 PE=1 SV=1	80.7889	105.509	74.4663	86.9212	1.93913	0.188729	3	1301	106.986	85.31	113.807	102.034	2.00875	0.145831	14.8798	3	1245	1.17387	0.231274
P62333;A0A087X2I1;H0YJC0;H0YJS8;H0YJT1	8	3	45.7238	0.0035073	2.45503	0.00479851	1.35043	0.993347	PF44	CF42	44458.2	26S proteasome regulatory subunit 10B OS=Homo sapiens OX=9606 GN=PSMC6 PE=1 SV=1	361.641	324.983	330.452	339.025	2.53023	0.0583311	3	845	450.303	433.829	489.36	457.831	2.66071	0.0622954	28.5207	3	738	1.35043	0.433421
P62191;P62191-2	4	2	23.2328	0.657555	0.182068	0.194777	1.02219	0.0663163	PF44	CF42	49355.7	26S proteasome regulatory subunit 4 OS=Homo sapiens OX=9606 GN=PSMC1 PE=1 SV=1	606.479	526.497	613.923	582.3	2.76515	0.0832381	3	639	582.282	605.568	597.814	595.222	2.77468	0.0199216	11.8578	3	632	1.02219	0.0316654
E9PM69;P17980;R4GNH3;E9PKD5;E9PMD8;E9PLG2;E9PN50	6	2	35.7841	0.374093	0.42702	0.125581	1.07309	0.122184	CF42	PF44	44609	26S proteasome regulatory subunit 6A OS=Homo sapiens OX=9606 GN=PSMC3 PE=1 SV=1	334.836	317.808	302.489	318.377	2.50294	0.0508228	3	865	325.834	305.223	259.022	296.693	2.47231	0.115316	34.2133	3	896	0.931892	-0.101766
A0A1W2PQS1;P35998;P35998-2	7	4	39.4092	0.23212	0.634287	0.0883934	1.35049	0.193792	CF42	PF44	45259.9	26S proteasome regulatory subunit 7 OS=Homo sapiens OX=9606 GN=PSMC2 PE=1 SV=1	176.766	319.624	297.642	264.677	2.42272	0.290629	3	936	208.338	199.717	179.901	195.985	2.29222	0.0744002	14.5814	3	1052	0.74047	-0.433486
P62195;P62195-2;J3KRP2;J3QLH6;J3QRW1;J3QSA9;J3QQM1;J3QRR3;J3QSE0;P43686-2	6	1	28.9863	0.0191641	1.71751	0.0150618	3.89099	0.806828	CF42	PF44	45797.2	26S proteasome regulatory subunit 8 OS=Homo sapiens OX=9606 GN=PSMC5 PE=1 SV=1	162.932	192.728	215.331	190.331	2.27951	0.138084	3	1054	82.5231	21.7031	42.5208	48.9157	1.68945	0.631908	30.9102	3	1392	0.257004	-1.96014
E5RHF4;E5RIZ4;Q9P015	1	1	4.5276	0.952956	0.0209272	0.258134	1.00426	0.0502799	PF44	CF42	22057.3	39S ribosomal protein L15_ mitochondrial (Fragment) OS=Homo sapiens OX=9606 GN=MRPL15 PE=1 SV=1	195.034	149.827	223.256	189.372	2.27732	0.195596	3	1058	220.804	160.917	188.817	190.179	2.27916	0.157572	29.9669	3	1058	1.00426	0.00613626
Q5H928;Q99714;Q99714-2	2	1	11.6638	0.236796	0.625625	0.0895408	1.63101	0.190361	PF44	CF42	17508.9	3-hydroxyacyl-CoA dehydrogenase type-2 OS=Homo sapiens OX=9606 GN=HSD17B10 PE=1 SV=1	74.2943	194.697	178.443	149.145	2.17361	0.43803	3	1145	276.401	303.757	149.611	243.256	2.38606	0.338097	82.2442	3	964	1.63101	0.705763
P62280;M0QZC5;M0R1H5;M0R1H6	12	9	90.4822	0.490366	0.30948	0.155293	1.02155	0.091339	CF42	PF44	18601.8	40S ribosomal protein S11 OS=Homo sapiens OX=9606 GN=RPS11 PE=1 SV=3	1529.45	1498.72	1422.13	1483.43	3.17127	0.0372562	3	331	1441.66	1413.93	1500.84	1452.14	3.16201	0.0305683	44.3896	3	336	0.978906	-0.0307574
P25398	10	6	74.504	0.000108025	3.96647	0.000547363	2.17851	1	PF44	CF42	14914.2	40S ribosomal protein S12 OS=Homo sapiens OX=9606 GN=RPS12 PE=1 SV=3	673.883	597.153	568.161	613.066	2.78751	0.0891062	3	612	1316.32	1351.28	1339.1	1335.57	3.12567	0.0132877	17.7466	3	361	2.17851	1.12334
P62277;J3KMX5;E9PS50	12	11	65.0831	0.0669028	1.17456	0.0361086	1.11092	0.476709	CF42	PF44	17222.3	40S ribosomal protein S13 OS=Homo sapiens OX=9606 GN=RPS13 PE=1 SV=2	2200.86	2437.77	2228.75	2289.13	3.35967	0.0565623	3	230	2084.56	1955.55	2141.62	2060.57	3.31399	0.0462621	95.3264	3	257	0.900156	-0.151753
A0A2R8Y811;P62263;E5RH77	4	2	24.8352	0.449522	0.347249	0.144375	1.03874	0.100468	PF44	CF42	16330.7	40S ribosomal protein S14 (Fragment) OS=Homo sapiens OX=9606 GN=RPS14 PE=1 SV=1	1106.86	1142.02	1243.71	1164.2	3.06603	0.0610454	3	401	1244.55	1244.91	1138.45	1209.3	3.08253	0.0507405	61.3606	3	389	1.03874	0.0548383
A0A0B4J2B4;K7ELC2;K7EM56;K7EQJ5;P62841;S4R417;K7EJ78;S4R456	3	1	21.4611	0.0229408	1.63939	0.016663	1.38382	0.764996	PF44	CF42	13742.3	40S ribosomal protein S15 OS=Homo sapiens OX=9606 GN=RPS15 PE=1 SV=1	706.676	933.853	833.127	824.552	2.91622	0.138052	3	508	1083.18	1241.27	1098.64	1141.03	3.0573	0.0763807	87.1525	3	403	1.38382	0.468651
P62244;I3L3P7;H3BN98;H3BVC7;I3L246;H3BT37;H3BV27;I3L303	7	6	57.4319	0.0201811	1.69505	0.0155769	1.27946	0.795172	CF42	PF44	14953.6	40S ribosomal protein S15a OS=Homo sapiens OX=9606 GN=RPS15A PE=1 SV=2	3381.52	3511.6	3399.59	3430.9	3.53541	0.0205388	3	161	2790.46	2909.09	2345.01	2681.52	3.42838	0.110907	297.398	3	203	0.781578	-0.355538
P62249;M0R210;M0R3H0;M0R1M5;M0QX76;Q6IPX4	9	5	55.8269	0.0426895	1.36968	0.0262659	1.13486	0.600832	PF44	CF42	16559.4	40S ribosomal protein S16 OS=Homo sapiens OX=9606 GN=RPS16 PE=1 SV=2	1671	1584.65	1572.47	1609.37	3.20666	0.0333757	3	315	1968.68	1754.11	1756.43	1826.41	3.2616	0.0674647	123.218	3	293	1.13486	0.18251
P62269;Q5GGW2;A0A0G2JQH2;J3JS69	16	11	75.9269	0.56734	0.246157	0.173053	1.01549	0.0777514	PF44	CF42	17718.7	40S ribosomal protein S18 OS=Homo sapiens OX=9606 GN=RPS18 PE=1 SV=3	2111.01	2294.91	2246.53	2217.48	3.34586	0.0429887	3	242	2260.14	2267.68	2227.67	2251.83	3.35254	0.00944163	21.261	3	240	1.01549	0.0221753
M0R2L9	7	1	48.7577	0.00633804	2.19804	0.00726	1.26954	0.968285	PF44	CF42	8303.51	40S ribosomal protein S19 (Fragment) OS=Homo sapiens OX=9606 GN=RPS19 PE=1 SV=1	523.884	503.834	506.347	511.355	2.70872	0.0213608	3	689	630.891	705.474	611.189	649.185	2.81237	0.0766092	49.7335	3	597	1.26954	0.344304
P39019;M0QXK4;M0QYF7;M0R140;A0A075B6E2	13	2	82.6016	0.0335955	1.47372	0.0222297	1.15366	0.66662	PF44	CF42	16060.5	40S ribosomal protein S19 OS=Homo sapiens OX=9606 GN=RPS19 PE=1 SV=2	506.682	517.248	480.391	501.44	2.70022	0.0378496	3	695	583.268	614.508	537.702	578.493	2.7623	0.066768	38.6248	3	647	1.15366	0.206221
P15880;H0YEN5;E9PQD7;E9PMM9;E9PM36;E9PPT0;I3L404;H0YE27;H3BNG3	14	12	97.3955	0.000609249	3.2152	0.00162587	1.15958	0.999999	PF44	CF42	31609.6	40S ribosomal protein S2 OS=Homo sapiens OX=9606 GN=RPS2 PE=1 SV=2	1433.61	1430.93	1494.85	1453.13	3.1623	0.0248795	3	336	1669.41	1698.75	1686.92	1685.03	3.22661	0.0087627	14.7654	3	308	1.15958	0.213608
G3XAN0;P60866;P60866-2	2	1	14.1793	0.305097	0.515562	0.109232	1.06148	0.150099	CF42	PF44	7304.46	40S ribosomal protein S20 OS=Homo sapiens OX=9606 GN=RPS20 PE=1 SV=1	2767.95	2434.04	2481.34	2561.11	3.40843	0.0705492	3	208	2403.29	2543.86	2291.19	2412.78	3.38252	0.0524719	126.603	3	229	0.942083	-0.0860745
P62266	3	2	12.6305	0.00548753	2.26062	0.00645752	1.16785	0.977276	CF42	PF44	15978.7	40S ribosomal protein S23 OS=Homo sapiens OX=9606 GN=RPS23 PE=1 SV=3	1100.27	1022.26	1031.32	1051.28	3.02172	0.0405827	3	434	929.804	883	887.751	900.185	2.95433	0.0286171	25.7607	3	490	0.856271	-0.22386
A0A087WUS0;A0A2R8Y849;A0A2R8YD14;E7ETK0;P62847;P62847-2;P62847-3;P62847-4;A0A2R8Y8A0	3	3	21.7428	0.0833616	1.07903	0.0423889	1.19023	0.41828	CF42	PF44	15353.2	40S ribosomal protein S24 OS=Homo sapiens OX=9606 GN=RPS24 PE=1 SV=1	897.502	870.247	821.768	863.173	2.9361	0.0444399	3	495	754.119	796.572	624.95	725.214	2.86047	0.123257	89.3878	3	562	0.840172	-0.251243
P62851	6	2	41.797	0.110616	0.956181	0.0520107	1.08103	0.347509	CF42	PF44	13799.2	40S ribosomal protein S25 OS=Homo sapiens OX=9606 GN=RPS25 PE=1 SV=1	667.259	679.656	725.16	690.692	2.83928	0.0441404	3	562	656.478	602.775	657.515	638.923	2.80545	0.0490028	31.309	3	608	0.925048	-0.1124
H0YMV8;Q71UM5;C9JLI6;P42677	4	2	27.831	0.000247183	3.60698	0.00087984	1.39679	1	CF42	PF44	11858.8	40S ribosomal protein S27 OS=Homo sapiens OX=9606 GN=RPS27L PE=1 SV=1	3347.44	3221.01	3521.1	3363.18	3.52675	0.0447977	3	167	2445.99	2382.76	2394.62	2407.79	3.38162	0.0139583	33.6086	3	231	0.715925	-0.482119
P23396;P23396-2;E9PL09;E9PPU1;F2Z2S8;H0YCJ7;H0YEU2;H0YF32;E9PJH4;E9PK82;E9PQ96;E9PQX2;E9PSF4;H0YES8	16	8	101.504	0.00376723	2.42398	0.0049507	1.161	0.99173	CF42	PF44	26859.4	40S ribosomal protein S3 OS=Homo sapiens OX=9606 GN=RPS3 PE=1 SV=2	3211.97	3345.09	3175.37	3244.14	3.5111	0.0275334	3	171	2879.86	2805.23	2697.73	2794.27	3.44627	0.0327664	91.5581	3	193	0.861328	-0.215365
P62861;E9PR30	2	1	8.1137	0.00339151	2.46961	0.00476782	1.60457	0.994011	CF42	PF44	6647.87	40S ribosomal protein S30 OS=Homo sapiens OX=9606 GN=FAU PE=1 SV=1	840.516	761.389	667.596	756.5	2.87881	0.114427	3	536	505.164	452.451	456.787	471.467	2.67345	0.0620669	29.2625	3	727	0.623221	-0.682183
P61247;D6RAT0;D6RG13;D6RB09;H0Y9Y4;E9PFI5;D6R9B6;H0Y8L7;D6RAS7;D6RED7;D6RGE0;D6RI02	20	16	128.011	0.0530739	1.27512	0.0306006	1.13993	0.540304	PF44	CF42	30173.1	40S ribosomal protein S3a OS=Homo sapiens OX=9606 GN=RPS3A PE=1 SV=2	1551.08	1759.37	1706.01	1672.15	3.22328	0.0647021	3	308	1821.16	1880.99	2016.24	1906.13	3.28015	0.05243	99.9386	3	280	1.13993	0.188943
P62701;Q8TD47;C9JEH7;P22090	9	7	72.2567	0.00140488	2.85236	0.00281431	1.1444	0.999835	PF44	CF42	29825.9	40S ribosomal protein S4_ X isoform OS=Homo sapiens OX=9606 GN=RPS4X PE=1 SV=2	2702.36	2690.19	2689.23	2693.93	3.43039	0.00271634	3	197	3088.44	2989.59	3170.77	3082.93	3.48896	0.029426	90.7184	3	178	1.1444	0.194594
P46782;M0QZN2;M0R0F0;M0R0R2	7	5	35.5899	0.250425	0.601323	0.0937069	1.14815	0.180941	CF42	PF44	23047.5	40S ribosomal protein S5 OS=Homo sapiens OX=9606 GN=RPS5 PE=1 SV=4	7822.26	6042.91	6175.53	6680.23	3.82479	0.148385	3	74	6176.69	6093.45	5184.64	5818.26	3.76479	0.0945834	550.311	3	93	0.870967	-0.19931
P62753;A2A3R5;A2A3R7	12	8	76.4577	0.000499145	3.30177	0.00141434	1.26364	1	CF42	PF44	28851.8	40S ribosomal protein S6 OS=Homo sapiens OX=9606 GN=RPS6 PE=1 SV=1	1459.92	1353.33	1406.12	1406.46	3.14813	0.0378945	3	351	1124.68	1112.15	1102.21	1113.02	3.0465	0.0101161	11.2593	3	416	0.791363	-0.337589
P62081;B5MCP9;A0A2R8Y623	9	7	46.8949	0.940052	0.0268481	0.255442	1.00365	0.050455	PF44	CF42	22126.9	40S ribosomal protein S7 OS=Homo sapiens OX=9606 GN=RPS7 PE=1 SV=1	3044.59	3278.52	3095.82	3139.64	3.49688	0.0391657	3	175	3138.02	3332.25	2983.07	3151.11	3.49846	0.0555232	174.96	3	175	1.00365	0.00526035
P62241;Q5JR95	10	7	78.1979	0.0046954	2.32833	0.00584475	1.15733	0.984661	CF42	PF44	24490.3	40S ribosomal protein S8 OS=Homo sapiens OX=9606 GN=RPS8 PE=1 SV=2	7174.51	6604.97	6755.12	6844.87	3.83537	0.0431255	3	72	5853.06	5903.36	5986.72	5914.38	3.77191	0.0114136	67.5047	3	92	0.86406	-0.210796
P46781;A0A024R4M0;B5MCT8;C9JM19;A8MXK4;F2Z3C0	11	1	62.1002	0.0133374	1.87493	0.0117471	1.27183	0.878886	CF42	PF44	22648.5	40S ribosomal protein S9 OS=Homo sapiens OX=9606 GN=RPS9 PE=1 SV=3	1058.58	1140.68	1184.99	1128.08	3.05234	0.0568581	3	412	906.365	945.374	809.197	886.979	2.94791	0.0790638	70.1279	3	496	0.78627	-0.346904
P08865;A0A0C4DG17;C9J9K3;F8WD59	11	8	48.6733	0.0017113	2.76667	0.00321156	1.12297	0.999568	PF44	CF42	32968.2	40S ribosomal protein SA OS=Homo sapiens OX=9606 GN=RPSA PE=1 SV=4	7326.12	7337.44	7252.09	7305.21	3.86363	0.00634575	3	64	8438.6	8153.97	8018.04	8203.54	3.914	0.0261612	214.615	3	66	1.12297	0.16732
F5GZS6;J3KPF3;P08195;P08195-2;P08195-3;P08195-4;F5GZI0;F5H0E2;F5H867;H0YFS2;H0YFX4	5	2	28.1893	0.114615	0.940759	0.0533665	3.75956	0.339043	PF44	CF42	65043.7	4F2 cell-surface antigen heavy chain OS=Homo sapiens OX=9606 GN=SLC3A2 PE=1 SV=1	13.3603	183.669	275	157.343	2.19685	0.843963	3	1125	617.759	602.093	554.77	591.541	2.77198	0.0554382	32.794	3	636	3.75956	1.91056
P49189;P49189-2	6	1	31.4079	0.0256351	1.59116	0.0182193	2.81521	0.737525	PF44	CF42	54714.5	4-trimethylaminobutyraldehyde dehydrogenase OS=Homo sapiens OX=9606 GN=ALDH9A1 PE=1 SV=3	208.565	71.4277	153.374	144.456	2.15974	0.477672	3	1158	413.149	444.41	362.46	406.673	2.60925	0.101696	41.3568	3	777	2.81521	1.49324
P13196;P13196-2	3	1	11.3626	0.00378175	2.42231	0.0049507	1.30371	0.991634	CF42	PF44	71436.4	5-aminolevulinate synthase_ nonspecific_ mitochondrial OS=Homo sapiens OX=9606 GN=ALAS1 PE=1 SV=2	4060.89	4099.01	4545.77	4235.22	3.62688	0.0636607	3	122	3291.67	3094.61	3359.46	3248.58	3.51169	0.0423516	137.583	3	168	0.767039	-0.382628
P21589;P21589-2;H0Y7R7;Q96B60;H0Y3X5	11	6	74.003	0.655578	0.183375	0.194325	1.01584	0.0665249	PF44	CF42	63938.1	5'-nucleotidase OS=Homo sapiens OX=9606 GN=NT5E PE=1 SV=1	2226.31	2034.23	2240.97	2167.17	3.33589	0.0532333	3	247	2256.26	2148.83	2199.41	2201.5	3.34272	0.0244138	53.7468	3	242	1.01584	0.0226729
P10809;E7ESH4;E7EXB4;P10809-2;C9JL25;C9JCQ4;C9JL19	23	15	153.852	0.0572035	1.24258	0.03229	1.12236	0.519568	PF44	CF42	61225.9	60 kDa heat shock protein_ mitochondrial OS=Homo sapiens OX=9606 GN=HSPD1 PE=1 SV=2	2694.14	2432.16	2619.85	2582.05	3.41196	0.0522914	3	205	2920.72	2732.64	3040.6	2897.98	3.4621	0.0535667	155.235	3	188	1.12236	0.166533
P10155;P10155-3;P10155-4;P10155-5;P10155-2	5	1	26.5903	0.0303616	1.51768	0.0206581	3.66796	0.693713	CF42	PF44	61412.1	60 kDa SS-A/Ro ribonucleoprotein OS=Homo sapiens OX=9606 GN=TROVE2 PE=1 SV=2	131.595	201.264	155.358	162.739	2.21149	0.217625	3	1112	17.3645	40.9149	74.8239	44.3677	1.64707	0.651033	28.8849	3	1409	0.272631	-1.87498
P05388;F8VU65;F8VW21;F8VWS0;P05388-2;G3V210;F8VPE8;F8VQY6;F8VRK7;F8VZS0;F8VS58;F8VWV4;F8W1K8	7	1	52.6629	0.123402	0.908679	0.0556528	1.05072	0.32176	PF44	CF42	34444.7	60S acidic ribosomal protein P0 OS=Homo sapiens OX=9606 GN=RPLP0 PE=1 SV=1	2302.15	2229.9	2195.76	2242.6	3.35075	0.024222	3	236	2424.65	2383.81	2260.58	2356.35	3.37224	0.0362485	85.4141	3	233	1.05072	0.0713791
Q8NHW5	7	1	45.4712	0.123402	0.908679	0.0556528	1.05072	0.32176	PF44	CF42	34535.6	60S acidic ribosomal protein P0-like OS=Homo sapiens OX=9606 GN=RPLP0P6 PE=5 SV=1	1050.14	1017.18	1001.61	1022.98	3.00987	0.024222	3	440	1106.02	1087.39	1031.18	1074.86	3.03135	0.0362485	38.9621	3	432	1.05072	0.0713791
P05386	3	1	17.6797	0.0453657	1.34327	0.0271372	19.7982	0.583935	PF44	CF42	11628	60S acidic ribosomal protein P1 OS=Homo sapiens OX=9606 GN=RPLP1 PE=1 SV=1		27.9511	32.8981	30.4246	1.48323	0.114974	2	1463	460.279	412.606	331.818	401.568	2.60376	0.16171	64.9376	3	780	13.1988	3.72233
P05387;H0YDD8	6	4	44.5199	0.297089	0.527113	0.106896	1.04236	0.154035	CF42	PF44	11665	60S acidic ribosomal protein P2 OS=Homo sapiens OX=9606 GN=RPLP2 PE=1 SV=1	3780	3917.13	3918.58	3871.9	3.58792	0.0205563	3	140	3939.7	3693.45	3510.55	3714.57	3.56991	0.0579748	215.351	3	142	0.959365	-0.0598481
P27635;X1WI28;A0A087WV22;F8W7C6;H7C123;H7C2C5;A6QRI9;B8A6G2	9	3	68.7313	0.00677829	2.16888	0.00757574	1.29195	0.963292	CF42	PF44	25060.2	60S ribosomal protein L10 OS=Homo sapiens OX=9606 GN=RPL10 PE=1 SV=4	2420.45	2111.72	2175.83	2236	3.34947	0.0728624	3	237	1670.14	1825.19	1696.8	1730.71	3.23822	0.0478995	82.9001	3	303	0.774021	-0.369555
P62906	9	3	47.0292	0.0367024	1.43531	0.0234186	1.3118	0.642542	CF42	PF44	25002.4	60S ribosomal protein L10a OS=Homo sapiens OX=9606 GN=RPL10A PE=1 SV=2	541.67	490.52	528.565	520.252	2.71621	0.0510692	3	681	333.215	417.446	439.119	396.593	2.59835	0.141068	55.9467	3	783	0.762311	-0.391549
Q96L21	6	1	33.6031	0.229948	0.638371	0.0880593	1.06631	0.195422	CF42	PF44	24975	60S ribosomal protein L10-like OS=Homo sapiens OX=9606 GN=RPL10L PE=1 SV=3	960.868	845.535	842.297	882.9	2.94591	0.0764998	3	484	819.219	823.013	841.747	827.993	2.91803	0.0145669	12.0613	3	514	0.93781	-0.0926321
P62913;P62913-2;Q5VVC8	6	3	41.8565	0.174937	0.757119	0.072377	1.09428	0.246514	PF44	CF42	20480.5	60S ribosomal protein L11 OS=Homo sapiens OX=9606 GN=RPL11 PE=1 SV=2	1942.91	1640.19	1644.25	1742.45	3.24116	0.099637	3	297	1877.61	1928.6	1914.01	1906.74	3.28029	0.0137727	26.261	3	279	1.09428	0.129987
P30050;P30050-2	9	4	60.1417	0.0665771	1.17668	0.0359779	1.11788	0.478031	CF42	PF44	17989.7	60S ribosomal protein L12 OS=Homo sapiens OX=9606 GN=RPL12 PE=1 SV=1	784.714	855.208	812.695	817.539	2.91251	0.0434181	3	511	783.199	689.746	721.051	731.332	2.86411	0.065042	47.5673	3	558	0.894553	-0.160761
P26373;J3QSB4;P26373-2;H3BTH3	10	6	61.242	0.624803	0.204257	0.187526	1.01715	0.0699986	PF44	CF42	24318.5	60S ribosomal protein L13 OS=Homo sapiens OX=9606 GN=RPL13 PE=1 SV=4	1346.26	1459.32	1364.66	1390.08	3.14304	0.0436437	3	357	1468.19	1407.21	1366.36	1413.92	3.15042	0.036243	51.2447	3	345	1.01715	0.0245342
M0QYS1;P40429;Q8J015;A0A096LPE0;M0QZU1	6	3	41.6735	0.355216	0.449507	0.122196	1.02673	0.128895	PF44	CF42	24161.8	60S ribosomal protein L13a (Fragment) OS=Homo sapiens OX=9606 GN=RPL13A PE=1 SV=2	3462.52	3172.24	3298.28	3311.01	3.51996	0.0439621	3	169	3389.7	3433.72	3375.17	3399.53	3.53142	0.00896733	30.4847	3	157	1.02673	0.0380635
P50914;E7EPB3	7	5	31.976	0.250811	0.600654	0.0937699	1.0384	0.180686	CF42	PF44	23545.9	60S ribosomal protein L14 OS=Homo sapiens OX=9606 GN=RPL14 PE=1 SV=4	3800.94	3685.96	3514.95	3667.28	3.56434	0.0392411	3	151	3641.69	3448.98	3504.32	3531.66	3.54798	0.0280942	99.2193	3	149	0.96302	-0.0543627
P61313;A0A2R8YEM3;E7EQV9;A0A2R8Y738;E7ENU7;E7EX53;P61313-2	6	4	31.1442	0.922627	0.0349736	0.252459	1.0146	0.0507594	CF42	PF44	24260.2	60S ribosomal protein L15 OS=Homo sapiens OX=9606 GN=RPL15 PE=1 SV=2	446.579	377.571	506.873	443.674	2.64706	0.145828	3	737	479.601	440.536	391.732	437.29	2.64077	0.100676	44.0244	3	752	0.98561	-0.0209119
A0A087WWH0;A0A087WXM6;A0A087WY81;A0A0A6YYL6;J3KRB3;J3KRX5;J3QQT2;J3QS96;P18621;P18621-3;A0A0A0MRF8;J3QLC8;P18621-2;J3KSJ0	4	1	24.221	0.147018	0.832628	0.0629424	1.14292	0.282641	PF44	CF42	15384.8	60S ribosomal protein L17 (Fragment) OS=Homo sapiens OX=9606 GN=RPL17 PE=3 SV=6	892.269	908.702	1017.53	939.501	2.9729	0.0724582	3	458	1148.54	1124.72	948.062	1073.77	3.03091	0.101993	109.517	3	434	1.14292	0.19272
Q07020;G3V203;H0YHA7;J3QQ67;Q07020-2;A0A075B7A0;F8VYV2;F8VUA6	11	6	53.5541	0.317683	0.498006	0.11252	1.04235	0.144246	PF44	CF42	21748.6	60S ribosomal protein L18 OS=Homo sapiens OX=9606 GN=RPL18 PE=1 SV=2	4949.21	4435.5	4540.82	4641.84	3.66669	0.0584563	3	108	4983.55	4821.37	4710.38	4838.43	3.6847	0.0283931	137.378	3	113	1.04235	0.0598416
M0R117;Q02543;M0R1A7;M0R0P7;M0R3D6	8	3	54.6054	0.0212633	1.67237	0.0160144	1.21963	0.783086	PF44	CF42	18364.3	60S ribosomal protein L18a OS=Homo sapiens OX=9606 GN=RPL18A PE=1 SV=1	896.858	867.797	758.175	840.943	2.92477	0.0869707	3	503	1013.16	1000.61	1063.15	1025.64	3.011	0.0322561	33.0832	3	445	1.21963	0.286448
P46778;G3V1B3;M0R181	4	2	37.6765	0.755884	0.121545	0.216029	1.02351	0.0578944	PF44	CF42	18621.9	60S ribosomal protein L21 OS=Homo sapiens OX=9606 GN=RPL21 PE=1 SV=2	2849.03	2511.42	2449	2603.15	3.4155	0.0826741	3	204	2866.63	2414.89	2711.49	2664.34	3.42559	0.08615	229.533	3	205	1.02351	0.0335193
P35268;K7EMH1;K7ERI7;K7ELC4;K7EKS7;K7EP65;K7EJT5;C9JYQ9;H0Y8C2;Q6P5R6	6	4	38.7726	0.353935	0.451076	0.122048	1.01211	0.129373	CF42	PF44	14844	60S ribosomal protein L22 OS=Homo sapiens OX=9606 GN=RPL22 PE=1 SV=2	2172.96	2203.99	2221.97	2199.64	3.34235	0.0112698	3	244	2169.34	2139.61	2211.02	2173.33	3.33712	0.0165048	35.8703	3	244	0.988037	-0.0173633
P62829;B9ZVP7;C9JD32;J3KT29;J3KTJ3	7	6	52.7538	0.93001	0.0315123	0.253474	1.00338	0.0506209	PF44	CF42	14979.5	60S ribosomal protein L23 OS=Homo sapiens OX=9606 GN=RPL23 PE=1 SV=1	5551.28	5348.78	4750.28	5216.78	3.7174	0.0798375	3	95	5487.56	5063.56	5152.08	5234.4	3.71887	0.0427301	223.667	3	105	1.00338	0.00486499
A8MUS3;H7BY10;K7ERT8;P62750;K7EJV9;K7EMA7	6	4	41.7388	0.163559	0.786325	0.068793	1.09599	0.260158	PF44	CF42	22030.2	60S ribosomal protein L23a OS=Homo sapiens OX=9606 GN=RPL23A PE=1 SV=1	3736.14	3535.74	3289.25	3520.38	3.54659	0.0635841	3	155	4090.7	3580.52	3903.64	3858.29	3.58639	0.066894	258.096	3	138	1.09599	0.132229
P83731;C9JNW5;C9JXB8	9	8	62.2807	0.869823	0.0605692	0.2403	1.01327	0.0521685	CF42	PF44	17893	60S ribosomal protein L24 OS=Homo sapiens OX=9606 GN=RPL24 PE=1 SV=1	2155.35	2032.49	1783	1990.28	3.29891	0.095328	3	262	2023.77	1996.05	1872.84	1964.22	3.29319	0.0409016	80.3398	3	266	0.986905	-0.0190167
P61353;K7ELC7	9	5	45.4767	0.000793528	3.10044	0.00192005	1.05289	0.999995	CF42	PF44	15797.8	60S ribosomal protein L27 OS=Homo sapiens OX=9606 GN=RPL27 PE=1 SV=2	1008.93	1009.09	996.205	1004.74	3.00205	0.00735773	3	443	947.417	959.064	956.342	954.274	2.97967	0.00638465	6.09271	3	472	0.949771	-0.0743481
P46776;E9PJD9;E9PLL6;E9PLX7	5	1	29.119	0.0330874	1.48034	0.022031	1.15991	0.670734	CF42	PF44	16675.5	60S ribosomal protein L27a OS=Homo sapiens OX=9606 GN=RPL27A PE=1 SV=2	1399.09	1222.71	1288.78	1303.53	3.11512	0.0683631	3	373	1166.74	1131.27	1073.44	1123.82	3.0507	0.0419067	47.0954	3	413	0.862135	-0.214014
P46779;H0YKD8;H0YMF4;P46779-2;P46779-3;P46779-4;P46779-5;H0YLP6	4	3	23.7396	0.107991	0.966614	0.0510549	1.09948	0.353292	PF44	CF42	15804.6	60S ribosomal protein L28 OS=Homo sapiens OX=9606 GN=RPL28 PE=1 SV=3	346.568	349.793	306.893	334.418	2.52429	0.0714433	3	851	353.413	372.619	377.029	367.687	2.56548	0.0341509	12.5568	3	805	1.09948	0.136826
P47914	2	1	13.8996	0.0892853	1.04922	0.0445593	1.11411	0.400599	CF42	PF44	17809.1	60S ribosomal protein L29 OS=Homo sapiens OX=9606 GN=RPL29 PE=1 SV=2	1854.69	1794.37	1772.29	1807.11	3.25699	0.0236024	3	286	1521.43	1776.44	1568.22	1622.03	3.21006	0.0836947	135.755	3	315	0.897579	-0.155889
P39023;B5MCW2;G5E9G0;H7C422;H7C3M2;F8WCR1	14	7	92.2698	0.072082	1.14217	0.0382803	1.27181	0.45663	PF44	CF42	46394.1	60S ribosomal protein L3 OS=Homo sapiens OX=9606 GN=RPL3 PE=1 SV=2	1005.67	1397.85	1304.91	1236.14	3.09207	0.165786	3	387	1502.35	1615.48	1598.58	1572.14	3.19649	0.0388148	61.0223	3	321	1.27181	0.346885
P62888;E5RI99;A0A0C4DH44;E5RJH3;A0A0B4J213	9	6	55.8663	0.0724604	1.1399	0.0383866	1.10941	0.45523	PF44	CF42	12955.2	60S ribosomal protein L30 OS=Homo sapiens OX=9606 GN=RPL30 PE=1 SV=2	2961.75	2692.25	2913.04	2855.68	3.45571	0.0502916	3	186	3350.71	3011.01	3142.62	3168.12	3.5008	0.054064	171.281	3	172	1.10941	0.149791
P62899;B7Z4C8;B7Z4E3;B8ZZK4;C9JU56;H7C2W9;P62899-2;P62899-3	5	2	25.8014	0.501624	0.299622	0.157813	1.0738	0.0890807	PF44	CF42	14462.9	60S ribosomal protein L31 OS=Homo sapiens OX=9606 GN=RPL31 PE=1 SV=1	415.235	474.665	556.139	482.013	2.68306	0.146757	3	714	557.456	533.63	461.664	517.583	2.71398	0.0963541	49.8713	3	701	1.0738	0.10272
D3YTB1;F8W727;P62910;D3YTI8	4	4	28.8714	0.156168	0.806409	0.0661363	1.10533	0.269783	PF44	CF42	15730.7	60S ribosomal protein L32 (Fragment) OS=Homo sapiens OX=9606 GN=RPL32 PE=1 SV=1	705.258	680.663	586.023	657.315	2.81777	0.0957734	3	587	708.044	749.059	722.543	726.549	2.86126	0.028627	20.7989	3	561	1.10533	0.144476
P42766;F2Z388	5	4	25.8274	0.00258577	2.58741	0.0040408	1.25175	0.997628	CF42	PF44	14551.5	60S ribosomal protein L35 OS=Homo sapiens OX=9606 GN=RPL35 PE=1 SV=2	971.641	1011	937.93	973.524	2.98835	0.037566	3	452	816.735	766.683	749.768	777.728	2.89083	0.0447753	34.823	3	540	0.79888	-0.32395
J3QSB5;Q9Y3U8;J3KTD3	4	1	23.4227	0.0775602	1.11036	0.0401946	1.22999	0.437164	PF44	CF42	10902.9	60S ribosomal protein L36 OS=Homo sapiens OX=9606 GN=RPL36 PE=1 SV=1	366.564	439.802	366.052	390.806	2.59196	0.108577	3	774	437.848	463.689	540.524	480.687	2.68186	0.111105	53.4069	3	722	1.22999	0.298645
H0Y5B4;H7BZ11;J3KQN4;P83881;Q969Q0	2	1	12.5684	0.033609	1.47354	0.0222297	1.31573	0.666512	CF42	PF44	13512.8	60S ribosomal protein L36a OS=Homo sapiens OX=9606 GN=RPL36A PE=3 SV=2	1365.37	1714.48	1362.18	1480.68	3.17046	0.136749	3	332	1136.5	1048.42	1191.19	1125.37	3.05129	0.0640101	72.0349	3	412	0.760036	-0.395861
C9J4Z3;E9PEL3;M0R0A1;M0R2L6;P61513;Q6P4E4;A6NKH3;G5E9R3	2	2	15.6553	0.176336	0.75366	0.0728158	1.11923	0.244926	PF44	CF42	7852.17	60S ribosomal protein L37a OS=Homo sapiens OX=9606 GN=RPL37A PE=1 SV=1	835.985	797.055	732.108	788.383	2.89674	0.0665655	3	523	787.269	932.35	927.522	882.381	2.94566	0.0933885	82.4042	3	500	1.11923	0.162505
P36578;H3BM89;H3BTP7;H3BU31	18	14	130.288	0.271915	0.565567	0.0994139	1.33316	0.167627	PF44	CF42	47982.5	60S ribosomal protein L4 OS=Homo sapiens OX=9606 GN=RPL4 PE=1 SV=5	1715.81	4010.64	3961.48	3229.31	3.50911	0.405956	3	172	4380.93	4269.06	4265.54	4305.18	3.63399	0.0152436	65.6264	3	127	1.33316	0.414846
P46777;A0A2R8Y6J3;Q5T7N0;A0A2R8Y4A2	12	8	78.8041	0.434597	0.361913	0.140736	1.03913	0.104213	PF44	CF42	34590.8	60S ribosomal protein L5 OS=Homo sapiens OX=9606 GN=RPL5 PE=1 SV=3	1860.25	1761.89	1926.59	1849.58	3.26707	0.0448045	3	281	2001.63	1973.66	1790.58	1921.95	3.28374	0.0596444	114.634	3	277	1.03913	0.055379
Q02878;F8VZ45;U3KQR5;F8VR69;F8VU16;F8VWR1;F8VZA3	12	7	75.7317	0.0171071	1.76682	0.0138495	1.26784	0.831282	CF42	PF44	32785	60S ribosomal protein L6 OS=Homo sapiens OX=9606 GN=RPL6 PE=1 SV=3	1543.04	1371.51	1267.47	1394	3.14426	0.0998224	3	355	1137.08	1078.83	1082.63	1099.51	3.0412	0.0296419	32.5917	3	422	0.788743	-0.342373
P18124;A8MUD9;C9JIJ5;C9JZ88	19	13	104.733	0.744758	0.127985	0.2137	1.01473	0.0586703	CF42	PF44	29282.9	60S ribosomal protein L7 OS=Homo sapiens OX=9606 GN=RPL7 PE=1 SV=1	2427.02	2728.56	2502.11	2552.56	3.40698	0.0614969	3	210	2441.8	2594.66	2510.11	2515.52	3.40063	0.0304399	76.5722	3	217	0.985488	-0.0210891
P62424;Q5T8U2;Q5T8U3	11	9	85.7585	0.312739	0.504819	0.111226	1.05046	0.146499	CF42	PF44	30166.7	60S ribosomal protein L7a OS=Homo sapiens OX=9606 GN=RPL7A PE=1 SV=2	3578.38	3522.95	3221.23	3440.85	3.53667	0.0558605	3	160	3193.52	3453.65	3179.59	3275.58	3.51529	0.0471264	154.366	3	165	0.951968	-0.0710145
P62917;E9PKZ0;G3V1A1;E9PKU4;E9PP36	8	6	61.5469	0.347095	0.459551	0.120461	1.04068	0.131976	CF42	PF44	28252.8	60S ribosomal protein L8 OS=Homo sapiens OX=9606 GN=RPL8 PE=1 SV=2	1079.26	966.387	1011.22	1018.96	3.00816	0.0557758	3	442	953.39	970.724	1013.26	979.125	2.99084	0.0314633	30.8065	3	466	0.96091	-0.0575264
P32969;A0A2R8Y5Y7;D6RAN4;H0Y9V9;E7ESE0;H0Y9R4	8	6	46.5076	0.966515	0.0147915	0.260823	1.00221	0.0501417	PF44	CF42	21977.5	60S ribosomal protein L9 OS=Homo sapiens OX=9606 GN=RPL9 PE=1 SV=1	2208.42	1919.59	1969.51	2032.51	3.30803	0.0759547	3	257	1958.41	1955.73	2196.85	2037	3.30899	0.0679638	138.442	3	260	1.00221	0.00318228
P52209;P52209-2;K7EM49;K7EMN2;K7EPF6;K7ELN9	12	8	85.3251	9.10578e-06	5.04068	0.000104222	1.98255	1	CF42	PF44	53653.3	6-phosphogluconate dehydrogenase_ decarboxylating OS=Homo sapiens OX=9606 GN=PGD PE=1 SV=3	2790.43	2729.38	2756.41	2758.74	3.44071	0.0110891	3	192	1333.65	1445	1395.88	1391.51	3.14349	0.0401047	55.8061	3	349	0.5044	-0.98736
M0R0U3;M0R261;O95336;M0R1L2	2	1	15.3576	0.0178369	1.74868	0.0143328	24.2875	0.822473	CF42	PF44	19139.9	6-phosphogluconolactonase OS=Homo sapiens OX=9606 GN=PGLS PE=1 SV=1	125.325	109.859	80.8383	105.341	2.0226	0.214399	3	1245	13.0117			13.0117	1.11434	#DIV/0!	#DIV/0!	1	1498	0.12352	-3.01718
Q8IZT6;Q8IZT6-2;Q5VYL4	36	4	153.712	0.0077014	2.11343	0.00819001	1.25192	0.952259	PF44	CF42	413451	Abnormal spindle-like microcephaly-associated protein OS=Homo sapiens OX=9606 GN=ASPM PE=1 SV=2	212.403	212.47	195.129	206.667	2.31527	0.0483508	3	1024	277.07	247.422	251.699	258.73	2.41285	0.0619422	16.0263	3	941	1.25192	0.324139
Q9BWD1;Q9BWD1-2	3	1	15.2834	0.262321	0.581167	0.0969788	1.19586	0.173356	CF42	PF44	41864.2	Acetyl-CoA acetyltransferase_ cytosolic OS=Homo sapiens OX=9606 GN=ACAT2 PE=1 SV=2	518.272	714.682	592.358	608.437	2.78422	0.163019	3	616	589.601	521.008	415.75	508.786	2.70654	0.17211	87.567	3	705	0.836218	-0.258049
P24752;P24752-2;E9PKF3;E9PRQ6;H0YEL7	4	4	26.1463	0.230969	0.636447	0.0882671	1.56495	0.194653	PF44	CF42	45484.8	Acetyl-CoA acetyltransferase_ mitochondrial OS=Homo sapiens OX=9606 GN=ACAT1 PE=1 SV=1	354.213	338.485	343.388	345.362	2.53827	0.0233029	3	832	296.247	706.316	618.863	540.475	2.73278	0.399612	215.981	3	673	1.56495	0.64612
P68032;P68133;P62736;P63267;A6NL76;P63267-2;C9JFL5;F6QUT6;F6UVQ4	31	6	374.929	0.302433	0.51937	0.108547	1.02279	0.151389	PF44	CF42	42361.2	Actin_ alpha cardiac muscle 1 OS=Homo sapiens OX=9606 GN=ACTC1 PE=1 SV=1	17357.4	18243.7	17930.1	17843.8	4.25149	0.0251876	3	26	18672.7	17901.5	18177.2	18250.5	4.26127	0.0214124	390.786	3	29	1.02279	0.0325129
P60709;P63261;A0A2R8Y793;I3L4N8;I3L1U9;I3L3I0;A0A2R8YEA7;A0A2R8YGF8;E7EVS6;G5E9R0;I3L3R2;J3KT65;K7EM38;C9JUM1;C9JZR7;A0A2R8YFE2;B8ZZJ2;C9JTX5;F8WB63;Q9BYX7;F8WCH0;Q6P9G0;Q6P9G0-2	88	27	570.724	0.0370369	1.43137	0.0235159	1.07328	0.640056	CF42	PF44	42079	Actin_ cytoplasmic 1 OS=Homo sapiens OX=9606 GN=ACTB PE=1 SV=1	46663.7	45616.6	43827.7	45369.3	4.65676	0.0316092	3	8	43048.8	42627.6	41138.3	42271.6	4.62605	0.0237458	1003.77	3	10	0.931722	-0.102029
P61160;P61160-2;F5H6T1;A0A1B0GWD0;A0A1B0GWH0	9	5	59.1747	0.107975	0.966678	0.0510549	1.09327	0.353328	PF44	CF42	45046	Actin-related protein 2 OS=Homo sapiens OX=9606 GN=ACTR2 PE=1 SV=1	2684.22	2438.97	2377.73	2500.31	3.39799	0.0648685	3	217	2842.26	2735.68	2622.62	2733.52	3.43672	0.040182	109.838	3	197	1.09327	0.128654
O15143;C9JEY1;C9K057;C9J4Z7;C9J6C8;C9JFG9;C9JQM8;F8VXW2	6	2	37.7315	0.0658537	1.18142	0.0356766	1.10464	0.480995	CF42	PF44	41748.2	Actin-related protein 2/3 complex subunit 1B OS=Homo sapiens OX=9606 GN=ARPC1B PE=1 SV=3	1318.17	1168.41	1224.78	1237.12	3.09241	0.0611443	3	386	1136.6	1081.1	1142.08	1119.93	3.04919	0.0301262	33.7391	3	414	0.90527	-0.14358
O15144;C9JTV5;G5E9J0;G5E9S7;H7C3F9	11	9	63.0529	0.557242	0.253956	0.170941	1.01826	0.0793057	PF44	CF42	34447.1	Actin-related protein 2/3 complex subunit 2 OS=Homo sapiens OX=9606 GN=ARPC2 PE=1 SV=1	2869.66	2735.35	2962.08	2855.7	3.45571	0.039922	3	185	2832.76	3001.2	2889.61	2907.85	3.46357	0.0294682	85.6891	3	187	1.01826	0.0261117
O15145;C9JZD1;F8VR50	3	2	13.7172	0.81524	0.0887147	0.22964	1.01189	0.0544289	CF42	PF44	20774.8	Actin-related protein 2/3 complex subunit 3 OS=Homo sapiens OX=9606 GN=ARPC3 PE=1 SV=3	1739.92	1703.32	1585.95	1676.4	3.22438	0.0479843	3	306	1788.95	1537.99	1643.13	1656.69	3.21924	0.0760723	126.028	3	310	0.988245	-0.017059
P59998;P59998-3;F8WCF6;H7C0A3;A0A0A6YYG9;F8WDD7;P59998-4;R4GN08	7	1	40.1642	0.333431	0.476993	0.116659	1.26691	0.137448	PF44	CF42	19781.1	Actin-related protein 2/3 complex subunit 4 OS=Homo sapiens OX=9606 GN=ARPC4 PE=1 SV=3	183.802	100.317	195.941	160.02	2.20417	0.325332	3	1118	162.156	206.227	239.808	202.73	2.30692	0.192098	38.9441	3	1035	1.26691	0.34131
P61158;B4DXW1;F8WDR7;F8WE84;F8WEW2	15	10	84.709	0.144816	0.839185	0.0621847	1.05353	0.285907	CF42	PF44	47827.5	Actin-related protein 3 OS=Homo sapiens OX=9606 GN=ACTR3 PE=1 SV=3	2255.35	2146.7	2262.81	2221.62	3.34667	0.0292536	3	241	2027.36	2198.41	2100.45	2108.74	3.32402	0.0407009	85.8277	3	251	0.949191	-0.07523
Q6P461;H7BXS6;Q6P461-3	4	1	13.7591	0.0522833	1.28164	0.0302663	1.22267	0.544468	CF42	PF44	54497.6	Acyl-coenzyme A synthetase ACSM6_ mitochondrial OS=Homo sapiens OX=9606 GN=ACSM6 PE=2 SV=3	251.769	255.4	262.63	256.6	2.40926	0.0215475	3	947	219.054	230.198	180.353	209.868	2.32195	0.124657	26.1615	3	1021	0.817882	-0.290035
P07741;H3BQZ9;H3BQB1;H3BQF1;H3BSW3;P07741-2	4	2	23.5164	0.309968	0.508684	0.110462	1.58569	0.147787	CF42	PF44	19778.9	Adenine phosphoribosyltransferase OS=Homo sapiens OX=9606 GN=APRT PE=1 SV=2	118	253.046	91.5484	154.198	2.18808	0.561746	3	1129	87.9231	117.554	86.2543	97.2438	1.98786	0.18108	17.6089	3	1256	0.630642	-0.665108
P25054;P25054-3;P25054-2;E9PFT7;A0A2Q2SV78;D6RFL6;E7EMH9;R4GMU6	10	1	40.4225	0.0688887	1.16185	0.0369489	6.80691	0.468803	CF42	PF44	313813	Adenomatous polyposis coli protein OS=Homo sapiens OX=9606 GN=APC PE=1 SV=2	326.205	348.744	65.2779	246.742	2.39224	0.638546	3	960	51.9687	47.3076	9.47013	36.2488	1.55929	0.642996	23.3078	3	1431	0.14691	-2.767
P23526;P23526-2	5	5	30.1931	0.0927591	1.03264	0.045554	1.15266	0.390901	CF42	PF44	48286.5	Adenosylhomocysteinase OS=Homo sapiens OX=9606 GN=AHCY PE=1 SV=4	774.908	956.07	877.415	869.464	2.93925	0.104481	3	491	732.393	756.668	773.873	754.311	2.87755	0.0276277	20.8399	3	549	0.867559	-0.204967
P30520	3	1	13.3593	0.472574	0.32553	0.150655	1.03004	0.0951265	CF42	PF44	50496.6	Adenylosuccinate synthetase isozyme 2 OS=Homo sapiens OX=9606 GN=ADSS PE=1 SV=3	761.135	744.936	719.965	742.012	2.87041	0.0279514	3	543	729.859	673.204	758.052	720.372	2.85756	0.0599859	43.2121	3	565	0.970836	-0.0427007
Q01518;Q01518-2;Q5T0R1;Q5T0R2;Q5T0R3;Q5T0R4;Q5T0R5;Q5T0R6;Q5T0R7;Q5T0R9	17	15	131.422	0.0078272	2.10639	0.00828288	1.18618	0.950707	PF44	CF42	52357.8	Adenylyl cyclase-associated protein 1 OS=Homo sapiens OX=9606 GN=CAP1 PE=1 SV=5	5694.86	6099.66	5675.63	5823.38	3.76518	0.0411191	3	88	6574.67	6988.26	7159.79	6907.57	3.83933	0.0435452	300.791	3	79	1.18618	0.246321
Q9HDC9;H0Y512;Q9HDC9-2	8	1	48.1686	0.138214	0.859449	0.0603119	1.13859	0.296132	PF44	CF42	46651.5	Adipocyte plasma membrane-associated protein OS=Homo sapiens OX=9606 GN=APMAP PE=1 SV=2	722.335	692.741	718.17	711.082	2.85192	0.0225288	3	555	904.886	718.381	805.623	809.63	2.90829	0.115259	93.3174	3	522	1.13859	0.187247
P05141;V9GYG0	12	1	56.6081	0.393894	0.40462	0.130599	1.06696	0.115755	CF42	PF44	33080.4	ADP/ATP translocase 2 OS=Homo sapiens OX=9606 GN=SLC25A5 PE=1 SV=7	702.234	582.129	675.044	653.136	2.815	0.0964249	3	590	643.625	616.908	575.9	612.144	2.78685	0.0557271	34.113	3	622	0.937239	-0.0935104
P12236;P12235	7	1	47.4257	0.66026	0.180285	0.195176	1.01786	0.0660337	CF42	PF44	33094.4	ADP/ATP translocase 3 OS=Homo sapiens OX=9606 GN=SLC25A6 PE=1 SV=4	614.734	574.491	640.515	609.913	2.78527	0.0545566	3	615	610.847	607.258	579.53	599.212	2.77758	0.0286029	17.1392	3	627	0.982454	-0.0255383
Q9H0C2	9	1	48.5538	0.0924011	1.03432	0.0454819	1.1669	0.391879	CF42	PF44	35307.1	ADP/ATP translocase 4 OS=Homo sapiens OX=9606 GN=SLC25A31 PE=2 SV=1	2032.14	1738.58	1852.24	1874.32	3.27284	0.0789729	3	277	1723.69	1653.28	1441.73	1606.23	3.20581	0.0913614	146.748	3	320	0.856969	-0.222686
P61204;P84077;F5H423;P61204-2;F5H0C7;C9J1Z8;P84085;H0YGG7	10	2	83.7138	0.254732	0.593916	0.0949887	1.05534	0.17813	PF44	CF42	20657.8	ADP-ribosylation factor 3 OS=Homo sapiens OX=9606 GN=ARF3 PE=1 SV=2	1888.99	1727.6	1676.32	1764.3	3.24657	0.0629063	3	295	1891.08	1907.13	1787.62	1861.95	3.26997	0.0348359	64.8626	3	288	1.05534	0.0777136
P18085;C9JPM4;C9JAK5;F8WDB3;U3KQF2;C9J6P1;F5H1V1;F5H6T5	11	5	79.8931	0.60882	0.215511	0.183496	1.02656	0.0719802	CF42	PF44	20624.9	ADP-ribosylation factor 4 OS=Homo sapiens OX=9606 GN=ARF4 PE=1 SV=3	2895.05	2521.91	2560.6	2659.19	3.42475	0.0771588	3	200	2589.82	2605.68	2575.68	2590.39	3.41337	0.00579437	15.0097	3	207	0.97413	-0.0378141
Q96BM9;Q9NVJ2	3	1	20.2169	0.134761	0.870435	0.059179	1.32875	0.301755	PF44	CF42	21644.1	ADP-ribosylation factor-like protein 8A OS=Homo sapiens OX=9606 GN=ARL8A PE=1 SV=1	249.742	202.67	338.949	263.787	2.42125	0.262396	3	937	395.482	325.647	330.392	350.507	2.5447	0.111329	39.0215	3	824	1.32875	0.41007
Q9Y6U3;Q9Y6U3-3;Q9Y6U3-2;E5RHX6;E5RHN8	10	3	66.8086	0.000109882	3.95907	0.0005503	14.9324	1	CF42	PF44	80945.2	Adseverin OS=Homo sapiens OX=9606 GN=SCIN PE=1 SV=4	406.289	402.689	355.937	388.305	2.58917	0.0723376	3	779	17.995	27.7746	32.2432	26.0043	1.41504	0.280231	7.28722	3	1458	0.0669687	-3.90037
Q02952;Q02952-2;Q02952-3	9	3	37.0245	0.435722	0.36079	0.140994	1.11261	0.103923	PF44	CF42	192052	A-kinase anchor protein 12 OS=Homo sapiens OX=9606 GN=AKAP12 PE=1 SV=4	278.016	263.448	232.934	258.133	2.41184	0.0891268	3	946	233.088	301.35	327.167	287.202	2.45819	0.169252	48.6094	3	910	1.11261	0.153953
P49588;P49588-2;H3BPK7	15	3	87.4847	0.732818	0.135004	0.2114	1.37378	0.05955	CF42	PF44	107552	Alanine--tRNA ligase_ cytoplasmic OS=Homo sapiens OX=9606 GN=AARS PE=1 SV=2	864.035	271.747	251.83	462.537	2.66515	0.752047	3	730	331.005	332.39	346.678	336.691	2.52723	0.0257701	8.67656	3	842	0.727921	-0.458146
P14550;Q5T621;V9GYP9	6	2	38.1508	0.521614	0.282651	0.162324	1.03848	0.085315	PF44	CF42	36915.3	Alcohol dehydrogenase [NADP(+)] OS=Homo sapiens OX=9606 GN=AKR1A1 PE=1 SV=3	714.911	834.725	812.342	787.326	2.89615	0.0809122	3	524	802.207	864.483	786.168	817.619	2.91255	0.0505977	41.3697	3	521	1.03848	0.0544677
P15121;E9PCX2;E9PEF9;V9GYG2	9	3	64.2327	0.64358	0.191397	0.191879	1.02885	0.0678277	PF44	CF42	36252.6	Aldose reductase OS=Homo sapiens OX=9606 GN=AKR1B1 PE=1 SV=3	628.268	726.54	752.446	702.418	2.8466	0.0932622	3	559	684.218	744.174	739.659	722.684	2.85895	0.0462014	33.389	3	563	1.02885	0.0410348
O00116;A0A1B0GWA2;A0A2R8YEL0;B8ZZ81	4	1	15.5195	0.415662	0.381259	0.136555	1.03316	0.109325	CF42	PF44	73710.3	Alkyldihydroxyacetonephosphate synthase_ peroxisomal OS=Homo sapiens OX=9606 GN=AGPS PE=1 SV=1	2608.89	2485.85	2608.59	2567.78	3.40956	0.0276312	3	206	2349.6	2471.26	2635.26	2485.37	3.39539	0.0576787	143.353	3	222	0.967909	-0.0470569
P01023;P20742;P20742-2	8	1	35.8206	0.0031149	2.50656	0.00450191	1.8985	0.995454	CF42	PF44	164717	Alpha-2-macroglobulin OS=Homo sapiens OX=9606 GN=A2M PE=1 SV=3	791.964	798.172	709.543	766.56	2.88455	0.0645418	3	534	349.195	382.333	479.786	403.772	2.60614	0.168124	67.8835	3	778	0.526732	-0.924859
P12814;G3V2N5;G3V2W4;H0YJ11;H0YJW3;H7C5W8;G3V2X9;G3V5M4;G3V380	40	2	340.686	0.905663	0.0430332	0.248607	1.00348	0.0511316	PF44	CF42	103628	Alpha-actinin-1 OS=Homo sapiens OX=9606 GN=ACTN1 PE=1 SV=2	336.074	360.466	343.335	346.625	2.53986	0.0361316	3	830	347.512	336.582	359.395	347.83	2.54137	0.0328024	11.4097	3	831	1.00348	0.00500635
O43707;O43707-2;F5GXS2;O43707-3;H7C144;K7EJH8;G3V2E8;K7EP19	41	15	317.98	0.00613497	2.21219	0.00705958	1.29076	0.970516	CF42	PF44	105310	Alpha-actinin-4 OS=Homo sapiens OX=9606 GN=ACTN4 PE=1 SV=2	7142.16	6067.08	6561.47	6590.23	3.8189	0.0816538	3	76	5158.13	5138.32	5020.67	5105.71	3.70806	0.0145534	74.3055	3	107	0.774738	-0.368219
P61163;R4GMT0;A0A1B0GVS3;P42025	6	2	30.526	0.054084	1.26693	0.0309345	2.00799	0.535077	CF42	PF44	42727.9	Alpha-centractin OS=Homo sapiens OX=9606 GN=ACTR1A PE=1 SV=1	187.239	361.257	370.784	306.427	2.48633	0.337207	3	881	181.162	128.198	148.452	152.604	2.18357	0.175127	26.7251	3	1119	0.498011	-1.00575
P06733;A0A2R8Y6G6;P06733-2;K7EM90;A0A2R8YEM5;A0A2R8Y879;K7ERS8;A0A2R8Y798;A0A2R8YEG5;A0A1B0GUL7;A0A2R8Y6I8	45	27	320.439	0.0274859	1.56089	0.0191864	1.0501	0.719734	PF44	CF42	47511.2	Alpha-enolase OS=Homo sapiens OX=9606 GN=ENO1 PE=1 SV=2	22894.3	22961.5	22595.6	22817.1	4.35826	0.0085351	3	21	24566.5	23458.1	23855.9	23960.2	4.37949	0.0234345	561.494	3	20	1.0501	0.0705217
J3KNQ4;Q9NVD7;Q9NVD7-2	2	1	8.8623	0.602532	0.22002	0.181883	1.09484	0.0727951	CF42	PF44	46647	Alpha-parvin OS=Homo sapiens OX=9606 GN=PARVA PE=1 SV=1	286.501	228.499	191.408	235.469	2.37193	0.203543	3	977	258.158	204.41	182.649	215.072	2.33258	0.180716	38.8669	3	1013	0.913378	-0.130716
P54920;M0R0Y2;M0R2M1;M0R058;M0R213;A0A087WZQ7;M0R027;M0R0I4;Q9H115;Q9H115-2;Q9H115-3	6	3	32.4181	0.0622098	1.20614	0.0341753	1.30406	0.496511	PF44	CF42	33689	Alpha-soluble NSF attachment protein OS=Homo sapiens OX=9606 GN=NAPA PE=1 SV=3	272.58	318.63	356.863	316.024	2.49972	0.133539	3	866	386.091	379.974	470.276	412.114	2.61502	0.122448	50.4625	3	771	1.30406	0.383008
A0A087WTU9;Q8TCU4;Q8TCU4-2;A0A087WV20;Q8TCU4-3;H7C1D9	20	3	82.8176	0.640129	0.193733	0.191193	1.05213	0.0682145	CF42	PF44	458699	Alstrom syndrome protein 1 OS=Homo sapiens OX=9606 GN=ALMS1 PE=1 SV=1	124.008	137.447	162.085	141.18	2.14977	0.136785	3	1165	120.606	140.498	141.449	134.184	2.1277	0.0877067	11.7689	3	1164	0.950449	-0.0733188
D6R937;Q12904;Q12904-2	2	1	12.0094	0.0361696	1.44166	0.0232162	1.58878	0.646544	PF44	CF42	16578.1	Aminoacyl tRNA synthase complex-interacting multifunctional protein 1 (Fragment) OS=Homo sapiens OX=9606 GN=AIMP1 PE=1 SV=1	180.087	167.424	124.936	157.482	2.19723	0.183439	3	1124	294.269	248.235	208.113	250.205	2.3983	0.172305	43.1117	3	952	1.58878	0.667923
P15144;H0YKT6;H0YMC1;H0YLZ8	39	35	307.455	0.354623	0.450234	0.12209	1.16687	0.129116	PF44	CF42	109939	Aminopeptidase N OS=Homo sapiens OX=9606 GN=ANPEP PE=1 SV=4	4369.35	7515.68	7087.91	6324.31	3.80101	0.269833	3	81	7632.95	7462.21	7043.75	7379.64	3.86803	0.0410801	303.156	3	74	1.16687	0.222641
E9PLK3;P55786;P55786-2;H0YDG0;A6NEC2;A6NEC2-3;E9PJF9;E9PJY4;E9PPD4;E9PPZ2	9	2	52.4822	0.188994	0.723552	0.0766466	1.26612	0.231354	CF42	PF44	103786	Aminopeptidase OS=Homo sapiens OX=9606 GN=NPEPPS PE=1 SV=1	254.716	355.142	403.161	337.673	2.5285	0.224325	3	848	263.688	275.761	260.647	266.698	2.42602	0.0299738	7.99398	3	932	0.789813	-0.340418
Q9UJX3;Q9UJX3-2	3	1	13.7522	0.0442029	1.35455	0.0268426	1.6935	0.591155	CF42	PF44	67483	Anaphase-promoting complex subunit 7 OS=Homo sapiens OX=9606 GN=ANAPC7 PE=1 SV=4	269.358	295.58	170.016	244.985	2.38914	0.270365	3	962	150.924	143.054	140.007	144.662	2.16035	0.0389432	5.63359	3	1140	0.590493	-0.760007
Q8N7X0;H0Y334;Q8N7X0-2;H0Y333;H0YBE5;E5RFN4;E5RGD1;F8W7W4	15	1	76.3763	0.000732227	3.13535	0.00183565	1.24875	0.999997	CF42	PF44	190797	Androglobin OS=Homo sapiens OX=9606 GN=ADGB PE=2 SV=3	4191.97	3903.19	3957.91	4017.69	3.60398	0.0381791	3	135	3217.2	3269.35	3165.57	3217.38	3.5075	0.0161279	51.8894	3	170	0.800803	-0.320481
E7EWS1;Q7Z5J8;Q7Z5J8-2;Q7Z5J8-3	2	1	6.7575	0.0787532	1.10373	0.0406698	1.78082	0.433143	PF44	CF42	116126	Ankyrin and armadillo repeat-containing protein OS=Homo sapiens OX=9606 GN=ANKAR PE=1 SV=1	50.0172	29.5157	61.8876	47.1402	1.67339	0.347401	3	1418	101.061	63.9952	86.7881	83.9481	1.92401	0.222702	18.6954	3	1288	1.78082	0.83254
Q9H8Y5;C9JS61;C9K022	2	2	8.9438	0.120777	0.918014	0.0546984	5.68435	0.326743	PF44	CF42	81611.2	Ankyrin repeat and zinc finger domain-containing protein 1 OS=Homo sapiens OX=9606 GN=ANKZF1 PE=1 SV=1	38.1359		22.7902	30.463	1.48377	0.356204	2	1462	85.1451	121.426	139.754	115.442	2.06236	0.240745	27.792	3	1215	3.78957	1.92203
Q8TF21;Q8TF21-2;M0QZ18;M0R0N9	8	2	29.4281	0.213607	0.670384	0.0836175	1.0973	0.208496	CF42	PF44	125156	Ankyrin repeat domain-containing protein 24 OS=Homo sapiens OX=9606 GN=ANKRD24 PE=2 SV=2	624.632	613.792	733.223	657.216	2.81771	0.100495	3	588	579.892	591.247	625.68	598.94	2.77738	0.0398091	23.8432	3	628	0.911329	-0.133956
Q9BXX2	2	1	7.8283	0.0436427	1.36009	0.026662	1.71659	0.5947	CF42	PF44	159589	Ankyrin repeat domain-containing protein 30B OS=Homo sapiens OX=9606 GN=ANKRD30B PE=2 SV=3	204.003	242.158	215.999	220.72	2.34384	0.0883962	3	1002	171.494	88.6806	125.567	128.58	2.10917	0.322669	41.4889	3	1184	0.58255	-0.779547
Q01484;I6L894;E9PHW9;Q01484-2;A0A0U1RQN6;E9PCH6;H0Y931	12	1	49.9091	0.00239256	2.62114	0.00396332	1.3189	0.998228	PF44	CF42	436224	Ankyrin-2 OS=Homo sapiens OX=9606 GN=ANK2 PE=1 SV=4	2441.11	2530.46	2458.57	2476.71	3.39388	0.0191211	3	218	3207.54	3080.34	3511.7	3266.52	3.51409	0.0678548	221.649	3	166	1.3189	0.399331
Q12955;A0A087WTF3;Q12955-4;Q12955-5;Q12955-7;Q12955-6;A0A087WZ65;A0A087WVC2;H0Y3A4;A0A087WTE8;A0A087WY90;A0A087WZ26;B1AQT1;D6RFK6;D6RHE1;H0Y951;H0YA66	31	2	141.435	0.00678958	2.16816	0.00757574	1.16999	0.963161	PF44	CF42	482692	Ankyrin-3 OS=Homo sapiens OX=9606 GN=ANK3 PE=1 SV=3	2288.22	2413.24	2440.19	2380.55	3.37668	0.0340619	3	225	2911.97	2696.05	2747.6	2785.21	3.44486	0.0404874	112.766	3	194	1.16999	0.226491
P04083;Q5T3N1;Q5T3N0	40	31	242.315	0.00248638	2.60443	0.00401548	1.14828	0.997949	CF42	PF44	38942.4	Annexin A1 OS=Homo sapiens OX=9606 GN=ANXA1 PE=1 SV=2	15928.9	14972.7	15463.6	15455.1	4.18907	0.0309395	3	32	13322.2	13724.8	13330.7	13459.3	4.12902	0.0170914	230.037	3	42	0.870865	-0.199479
P50995;P50995-2;H0Y6E1	8	4	44.7052	0.372314	0.429091	0.125581	1.07332	0.122791	PF44	CF42	54732	Annexin A11 OS=Homo sapiens OX=9606 GN=ANXA11 PE=1 SV=1	465.922	532.442	560.466	519.61	2.71568	0.0934565	3	682	534.806	609.349	528.967	557.707	2.74641	0.0803621	44.8185	3	664	1.07332	0.102079
P07355;P07355-2;H0YN42;H0YMD0;H0YMU9;H0YM50;H0YKS4;H0YNP5;H0YMM1;H0YL33;H0YN28;H0YKX9;H0YKZ7;H0YLV6;H0YMT9;H0YMW4;H0YKL9;H0YKV8;H0YNA0;H0YMD9;H0YN52;H0YKN4;H0YNB8;H0YLE2	50	23	384.689	0.0627083	1.20268	0.0344053	1.10639	0.494329	CF42	PF44	38832.2	Annexin A2 OS=Homo sapiens OX=9606 GN=ANXA2 PE=1 SV=2	45843.6	42571.7	42501.7	43639	4.63987	0.043758	3	9	41275.7	39877.3	37175.5	39442.8	4.59597	0.0528442	2084.32	3	13	0.903844	-0.145854
P09525;P09525-2;Q6P452;B4E1S2	7	5	38.1186	0.0617473	1.20938	0.03401	1.30498	0.498554	PF44	CF42	36110.9	Annexin A4 OS=Homo sapiens OX=9606 GN=ANXA4 PE=1 SV=4	3667.11	4347.06	4396.83	4137	3.61669	0.0985496	3	128	5772.37	4538.67	5885.01	5398.68	3.73229	0.138352	746.919	3	98	1.30498	0.384023
P08758;D6RBL5;D6RBE9;E9PHT9;D6RCN3	36	28	205.407	0.324311	0.489039	0.11421	1.15782	0.141318	PF44	CF42	35993.9	Annexin A5 OS=Homo sapiens OX=9606 GN=ANXA5 PE=1 SV=2	11042.4	16552.6	16914.6	14836.5	4.17133	0.221805	3	34	17777.9	18013.2	15743.1	17178.1	4.23497	0.0726669	1248.28	3	32	1.15782	0.211415
P08133;P08133-2;E5RK69;E7EMC6;E5RFF0;E5RJF5;E5RK63;E5RI05;E5RJR0;E5RIU8;H0YC77	44	33	309.538	0.833338	0.0791787	0.233061	1.00743	0.0535853	PF44	CF42	76215.6	Annexin A6 OS=Homo sapiens OX=9606 GN=ANXA6 PE=1 SV=3	4363.88	4368.06	4043.73	4258.56	3.62926	0.0436912	3	121	4472.98	4243.32	4154.34	4290.21	3.63248	0.0383229	164.414	3	129	1.00743	0.0106839
P20073;P20073-2	5	3	25.7364	0.526863	0.278302	0.16325	1.06861	0.0843752	CF42	PF44	53024.5	Annexin A7 OS=Homo sapiens OX=9606 GN=ANXA7 PE=1 SV=3	698.87	601.26	524.587	608.239	2.78407	0.143613	3	617	561.291	547.759	598.512	569.187	2.75526	0.0461736	26.2814	3	658	0.935795	-0.0957349
O95782;O95782-2	11	6	64.5957	0.0360175	1.44349	0.0231756	1.1099	0.647696	PF44	CF42	108630	AP-2 complex subunit alpha-1 OS=Homo sapiens OX=9606 GN=AP2A1 PE=1 SV=3	535.244	550.894	538.118	541.419	2.73353	0.0153871	3	665	622.23	563.101	617.431	600.921	2.77882	0.0546508	32.8408	3	625	1.1099	0.15043
P63010;P63010-2;P63010-3;A0A087WU93;A0A087WZQ6;A0A087X253;K7EN71;K7ERB2;A0A087WYD1	8	2	42.9248	0.00908601	2.04163	0.00902435	2.11196	0.934742	CF42	PF44	105465	AP-2 complex subunit beta OS=Homo sapiens OX=9606 GN=AP2B1 PE=1 SV=1	159.961	120.956	174.933	151.95	2.1817	0.18339	3	1139	61.5173	65.6548	88.67	71.9474	1.85701	0.203332	14.6292	3	1324	0.473494	-1.07858
Q96CW1;A0A087WY71;E9PFW3;Q96CW1-2;C9JJ47;C9JGT8;C9JTK4;H7C4C3;C9JJD3;C9JPV8	8	1	37.1312	0.948561	0.0229348	0.257429	1.00435	0.0503348	PF44	CF42	49996.9	AP-2 complex subunit mu OS=Homo sapiens OX=9606 GN=AP2M1 PE=1 SV=2	1245.57	1151.06	1130.85	1175.82	3.07034	0.0520822	3	399	1241.55	1215.63	1085.62	1180.93	3.07223	0.0707504	83.5515	3	395	1.00435	0.00625674
P04114;A8MUN2	32	3	126.409	0.0108848	1.96318	0.0101913	1.11186	0.911154	PF44	CF42	516974	Apolipoprotein B-100 OS=Homo sapiens OX=9606 GN=APOB PE=1 SV=2	15732	15758.2	16452.9	15981	4.2036	0.0255834	3	30	18402.6	17609.5	17293.6	17768.6	4.24965	0.0321557	571.361	3	31	1.11186	0.152971
Q9BQE5;J3KQL8;B0QYK8;E9PM95	3	1	16.0024	0.216751	0.664039	0.0845594	1.60026	0.205864	PF44	CF42	37149.5	Apolipoprotein L2 OS=Homo sapiens OX=9606 GN=APOL2 PE=1 SV=1	30.3172	48.463	41.7636	40.1813	1.60402	0.22836	3	1432	36.5185	71.5198	84.8637	64.3007	1.80822	0.388301	24.968	3	1351	1.60026	0.67831
Q07812;Q07812-2;Q07812-5;Q07812-8;Q07812-7;K4JQN1;I6LPK7;Q07812-4;Q07812-6	5	3	30.7497	0.362267	0.440971	0.124126	1.04918	0.126317	PF44	CF42	21298.5	Apoptosis regulator BAX OS=Homo sapiens OX=9606 GN=BAX PE=1 SV=1	611.605	653.216	569.832	611.551	2.78643	0.0681738	3	614	655.963	660.845	608.08	641.629	2.80728	0.0454415	29.1566	3	606	1.04918	0.0692671
P54136;P54136-2	8	3	43.5884	0.0744671	1.12804	0.0391081	1.08867	0.447945	CF42	PF44	76177.5	Arginine--tRNA ligase_ cytoplasmic OS=Homo sapiens OX=9606 GN=RARS PE=1 SV=2	529.509	487.649	474.245	497.134	2.69647	0.0579862	3	699	459.447	446.567	463.923	456.645	2.65958	0.0197325	9.01076	3	739	0.918555	-0.122562
P08243;P08243-2;P08243-3;F8WEJ5;C9J057;C9JM09;C9JT45;C9JLN6	9	1	45.3369	0.0892648	1.04932	0.0445593	4.91119	0.400658	PF44	CF42	64940.3	Asparagine synthetase [glutamine-hydrolyzing] OS=Homo sapiens OX=9606 GN=ASNS PE=1 SV=4	8.20438	144.098	164.598	105.633	2.0238	0.804635	3	1244	532.732	566.49	457.136	518.786	2.71499	0.107934	55.9947	3	699	4.91119	2.29607
O43776;K7EIU7;K7EJ19;O43776-2	6	3	33.1841	0.724098	0.140203	0.209165	1.02824	0.0602241	PF44	CF42	63798.4	Asparagine--tRNA ligase_ cytoplasmic OS=Homo sapiens OX=9606 GN=NARS PE=1 SV=1	905.062	722.459	834.485	820.669	2.91417	0.112204	3	509	859.852	898.674	773.003	843.843	2.92626	0.0762547	64.347	3	509	1.02824	0.0401746
P17174;P17174-2	4	1	23.3735	0.213272	0.671066	0.0835806	1.24666	0.208781	CF42	PF44	46475.7	Aspartate aminotransferase_ cytoplasmic OS=Homo sapiens OX=9606 GN=GOT1 PE=1 SV=3	154.96	123.655	100.288	126.301	2.10141	0.217196	3	1197	88.7697	108.748	106.417	101.312	2.00566	0.107825	10.9239	3	1248	0.802145	-0.318066
P00505;P00505-2	11	6	61.2574	0.788575	0.103157	0.223297	1.01393	0.0558496	PF44	CF42	47916.9	Aspartate aminotransferase_ mitochondrial OS=Homo sapiens OX=9606 GN=GOT2 PE=1 SV=3	649.319	536.638	633.781	606.579	2.78289	0.100675	3	618	619.349	619.491	606.242	615.027	2.78889	0.0123714	7.60875	3	621	1.01393	0.0199538
P14868;P14868-2;H7BZ35;C9J7S3;C9JLC1	12	2	73.7974	0.0740153	1.13068	0.0390183	1.22835	0.449565	PF44	CF42	57535.5	Aspartate--tRNA ligase_ cytoplasmic OS=Homo sapiens OX=9606 GN=DARS PE=1 SV=2	456.956	524.573	457.259	479.596	2.68088	0.0812169	3	717	525.559	669.249	572.528	589.112	2.7702	0.124367	73.2664	3	638	1.22835	0.296723
Q12797;Q12797-10;E5RHK2;A0A087WW51;E5RG29;E5RG56;Q12797-11;Q12797-2;Q12797-5;Q12797-6;Q12797-8;Q12797-9;E5RHJ2;G3XAN5;Q12797-3;Q12797-4;Q12797-7	10	3	58.4433	0.0115093	1.93895	0.0105919	1.33558	0.902901	PF44	CF42	86318.9	Aspartyl/asparaginyl beta-hydroxylase OS=Homo sapiens OX=9606 GN=ASPH PE=1 SV=3	1142.84	1032.79	1028.83	1068.16	3.02863	0.0605827	3	431	1580.21	1311.25	1388.37	1426.61	3.15431	0.0970832	138.5	3	342	1.33558	0.417468
Q9UBB4;A0A1W2PQD2;Q9UBB4-2;B1AHE3	7	1	40.2285	0.505771	0.296046	0.158886	1.2123	0.0882742	CF42	PF44	54230.2	Ataxin-10 OS=Homo sapiens OX=9606 GN=ATXN10 PE=1 SV=1	150.711	303.882	221.241	225.278	2.35272	0.340314	3	993	213.694	178.728	165.06	185.827	2.26911	0.134975	25.0821	3	1065	0.824881	-0.277743
Q6DD88;F5H6I7	5	2	23.1644	0.00504475	2.29716	0.0061377	1.22333	0.981539	PF44	CF42	60998.3	Atlastin-3 OS=Homo sapiens OX=9606 GN=ATL3 PE=1 SV=1	1324.04	1417.75	1421.52	1387.77	3.14232	0.0397938	3	358	1661.89	1639.65	1791.54	1697.69	3.22986	0.0483205	82.0334	3	307	1.22333	0.290811
P24539;Q5QNZ2	4	3	18.6791	0.0597724	1.2235	0.0333836	1.06656	0.507471	CF42	PF44	28965.7	ATP synthase F(0) complex subunit B1_ mitochondrial OS=Homo sapiens OX=9606 GN=ATP5F1 PE=1 SV=2	486.202	471.065	489.015	482.094	2.68313	0.0200256	3	712	439.11	471.77	445.144	452.008	2.65515	0.0384471	17.3784	3	741	0.937594	-0.0929653
P25705;P25705-2;P25705-3;K7ERX7;K7EK77;K7ENJ4;K7EJP1;K7EQH4;K7ESA0;K7EM08	27	17	178.983	0.131142	0.88226	0.0581091	1.07634	0.307869	PF44	CF42	59864.8	ATP synthase subunit alpha_ mitochondrial OS=Homo sapiens OX=9606 GN=ATP5F1A PE=1 SV=1	4068.59	3826.92	3965.83	3953.78	3.59701	0.0306753	3	137	4431.04	4362.54	3973.26	4255.61	3.62896	0.0580203	246.912	3	130	1.07634	0.106135
P06576;H0YH81;F8W079;F8W0P7;H0YI37	26	20	171.443	0.191966	0.716777	0.077487	1.04652	0.228362	PF44	CF42	56560	ATP synthase subunit beta_ mitochondrial OS=Homo sapiens OX=9606 GN=ATP5F1B PE=1 SV=3	4167.36	4273.5	4048.84	4163.23	3.61943	0.0269947	3	127	4389.2	4520.05	4161.48	4356.91	3.63918	0.0416469	181.452	3	125	1.04652	0.0656024
P36542;P36542-2	3	2	17.6736	0.167065	0.777115	0.0699261	1.12349	0.25581	PF44	CF42	33053.1	ATP synthase subunit gamma_ mitochondrial OS=Homo sapiens OX=9606 GN=ATP5F1C PE=1 SV=1	825.597	673.334	702.733	733.888	2.86563	0.110059	3	547	879.53	808.126	785.894	824.517	2.9162	0.0593349	48.9226	3	518	1.12349	0.167989
P48047;H7C0C1;H7C068;H7C086	5	4	34.4784	0.0307465	1.5122	0.020887	1.59853	0.690372	CF42	PF44	23391.4	ATP synthase subunit O_ mitochondrial OS=Homo sapiens OX=9606 GN=ATP5PO PE=1 SV=1	485.936	338.008	341.059	388.334	2.58921	0.217698	3	778	254.919	265.042	208.836	242.932	2.38549	0.123323	29.9591	3	965	0.625575	-0.676746
C9JJT5;C9JU26;G3V325;P56134;P56134-2;P56134-3;P56134-4	2	1	15.1976	0.000302452	3.51934	0.00102571	1.23873	1	CF42	PF44	5914.94	ATP5MF-PTCD1 readthrough OS=Homo sapiens OX=9606 GN=ATP5MF-PTCD1 PE=4 SV=2	705.744	700.222	710.545	705.503	2.8485	0.00732238	3	557	589.614	562.682	556.318	569.538	2.75552	0.0310339	17.675	3	657	0.807279	-0.308861
Q9ULI0;Q9ULI0-2;C9J1G9;C9JG15	5	2	21.8123	0.120198	0.920104	0.0545506	1.33571	0.327864	PF44	CF42	166454	ATPase family AAA domain-containing protein 2B OS=Homo sapiens OX=9606 GN=ATAD2B PE=1 SV=3	103.381	146.285	114.556	121.407	2.08425	0.183329	3	1207	131.992	165.455	189.047	162.165	2.20996	0.176793	28.6697	3	1100	1.33571	0.417605
Q86UQ4;A0A0A0MT16;Q86UQ4-4;Q86UQ4-3;F5H7B7;Q86UQ4-5;Q86UQ4-6;Q86UQ4-7;H0Y4D2;H7C0U5	17	4	54.3769	0.0142127	1.84732	0.0122919	1.47332	0.867553	CF42	PF44	580894	ATP-binding cassette sub-family A member 13 OS=Homo sapiens OX=9606 GN=ABCA13 PE=2 SV=3	1582.24	1317.23	1244.97	1381.48	3.14034	0.128541	3	359	1025.23	839.607	948.162	937.666	2.97205	0.0994546	93.2552	3	478	0.678741	-0.559066
A0A087WXK5;J3QSS3;Q9BZC7;Q9BZC7-2;Q9BZC7-3;H0Y8C9;H0Y8D6	7	1	27.1014	0.0129897	1.8864	0.0115352	1.52976	0.883423	PF44	CF42	275403	ATP-binding cassette sub-family A member 2 OS=Homo sapiens OX=9606 GN=ABCA2 PE=1 SV=1	256.435	237.992	188.03	227.486	2.35695	0.155578	3	991	366.979	322.231	354.783	347.998	2.54158	0.066475	23.1331	3	829	1.52976	0.613302
A0A2R8Y4V0;A0A2R8Y4Z4;A0A2R8Y5D8;A0A2R8Y6Q0;A0A2R8YDG0;Q09428;Q09428-2;A0A2R8YEE5;A0A2R8YHG6;E9PK50;A0A2R8Y3M7;A0A2R8Y475;A0A2R8Y5I7;A0A2R8Y5V4;A0A2R8Y5X1;A0A2R8Y698;A0A2R8Y6B7;A0A2R8Y6I7;A0A2R8Y7I1;A0A2R8YCG4;A0A2R8YD94;A0A2R8YDG6;A0A2R8YDX3;A0A2R8YFB3;A0A2R8YFU3;A0A2R8YGQ6;A0A2R8Y781;A0A2R8Y775;H0YDH8	8	4	36.2303	0.29334	0.532629	0.105942	1.07402	0.155938	CF42	PF44	180841	ATP-binding cassette sub-family C member 8 OS=Homo sapiens OX=9606 GN=ABCC8 PE=1 SV=1	797.424	868.158	929.011	864.864	2.93695	0.0761451	3	494	764.197	784.139	867.447	805.261	2.90594	0.0680153	54.77	3	524	0.931084	-0.103017
P61221;D6R9I9;D6RGF4;H0Y990	7	2	37.1723	0.500753	0.300377	0.157655	1.04184	0.0892517	PF44	CF42	68283.9	ATP-binding cassette sub-family E member 1 OS=Homo sapiens OX=9606 GN=ABCE1 PE=1 SV=1	649.776	710.718	703.58	688.025	2.8376	0.0484225	3	563	749.96	652.927	747.55	716.812	2.85541	0.0772027	55.3398	3	568	1.04184	0.059135
P53396;P53396-2;P53396-3;K7ESG8	18	12	114.479	0.021139	1.67492	0.0160008	1.13682	0.784458	CF42	PF44	121752	ATP-citrate synthase OS=Homo sapiens OX=9606 GN=ACLY PE=1 SV=3	2306.19	2223.42	2069.71	2199.77	3.34238	0.054551	3	243	1937.58	1888.03	1979.47	1935.03	3.28669	0.0236548	45.7727	3	273	0.879648	-0.185001
Q01813;Q01813-2;B1APP6;B1APP8;Q5VSR5;V9GYV7;H0Y3Y3;H0Y757;V9GY25	22	12	160.891	0.0052592	2.27908	0.00627454	1.14561	0.979515	PF44	CF42	86508.7	ATP-dependent 6-phosphofructokinase_ platelet type OS=Homo sapiens OX=9606 GN=PFKP PE=1 SV=2	960.69	942.936	889.775	931.134	2.96901	0.0396301	3	463	1068.71	1049.57	1081.85	1066.71	3.02805	0.0152176	16.2328	3	435	1.14561	0.196112
P46063	4	1	17.8416	0.612255	0.213068	0.184402	1.25436	0.0715436	PF44	CF42	74484	ATP-dependent DNA helicase Q1 OS=Homo sapiens OX=9606 GN=RECQL PE=1 SV=3	66.9904	57.9565	131.88	85.6089	1.93252	0.471044	3	1304	84.3558	171.454	66.3426	107.384	2.03094	0.52347	56.2123	3	1232	1.25436	0.326948
Q08211;Q08211-2	10	7	62.4065	0.825998	0.0830209	0.231309	1.01811	0.0539159	PF44	CF42	142270	ATP-dependent RNA helicase A OS=Homo sapiens OX=9606 GN=DHX9 PE=1 SV=4	848.789	809.765	777.886	812.147	2.90963	0.0437254	3	513	843.212	900.837	736.517	826.855	2.91743	0.10083	83.3719	3	515	1.01811	0.0258946
Q92499;A0A087X2G1;F1T0B3;Q92499-2;Q92499-3	5	1	30.3916	0.437599	0.358924	0.141389	1.93009	0.103441	PF44	CF42	83401.7	ATP-dependent RNA helicase DDX1 OS=Homo sapiens OX=9606 GN=DDX1 PE=1 SV=2	25.3442	47.3882	0.550461	24.4276	1.38788	0.959255	3	1478	9.03406	60.7882	71.6201	47.1475	1.67346	0.709445	33.4486	3	1401	1.93009	0.948668
A0A0D9SF53;A0A0D9SFB3;A0A0D9SG12;A0A2R8Y4A4;A0A2R8Y5G6;A0A2R8Y645;A0A2R8Y7T2;A0A2R8YCW1;A0A2R8YDT5;A0A2R8YF78;A0A2R8YFR4;A0A2R8YFS5;A0A2U3TZJ9;O00571;O00571-2;F6S8Q4;O15523;O15523-2;A0A2R8YDH3;A0A087WVZ1;A0A0J9YVQ7;C9J081;H0Y960;O15523-3	10	2	64.7452	0.825661	0.083198	0.231309	1.01714	0.0539315	CF42	PF44	82161.5	ATP-dependent RNA helicase DDX3X OS=Homo sapiens OX=9606 GN=DDX3X PE=1 SV=1	723.71	675.601	597.713	665.675	2.82326	0.0955155	3	581	624.463	652.416	686.499	654.459	2.81588	0.047472	31.0685	3	594	0.983152	-0.0245141
Q96BY7	5	1	15.873	0.266777	0.573852	0.0981105	1.8983	0.170654	PF44	CF42	234645	Autophagy-related protein 2 homolog B OS=Homo sapiens OX=9606 GN=ATG2B PE=1 SV=5	9.07942	170.744	106.523	95.4487	1.97977	0.852806	3	1277	183.116	215.245	145.21	181.19	2.25814	0.193482	35.057	3	1068	1.8983	0.92471
P35613;A0A087X2B5;I3L192;P35613-2;A0A087WUV8;P35613-3;P35613-4;R4GMX5;R4GN83;A0A2R8YDZ0	5	3	25.6034	9.38268e-05	4.02767	0.000511528	1.74158	1	CF42	PF44	42599.6	Basigin OS=Homo sapiens OX=9606 GN=BSG PE=1 SV=2	641.882	607.411	588.914	612.736	2.78727	0.0438726	3	613	346.439	340.211	368.833	351.828	2.54633	0.042785	15.0529	3	820	0.574191	-0.800396
Q16620;Q16620-4;Q16620-2;Q16620-3;Q16620-5;Q16620-6;Q16620-7	3	1	13.0415	0.000313806	3.50334	0.00104771	7.56287	1	CF42	PF44	93253.7	BDNF/NT-3 growth factors receptor OS=Homo sapiens OX=9606 GN=NTRK2 PE=1 SV=1	172.976	171.764	179.525	174.755	2.24243	0.0238925	3	1084	16.2316	29.794	23.2953	23.107	1.36374	0.293555	6.78317	3	1470	0.132225	-2.91893
Q5T5X7	5	2	24.9831	0.0211138	1.67543	0.0160008	33.5148	0.784736	CF42	PF44	95615.3	BEN domain-containing protein 3 OS=Homo sapiens OX=9606 GN=BEND3 PE=1 SV=1	1509.91	171.52	180.632	620.686	2.79287	1.24072	3	607	7.01188	10.4617	38.0856	18.5197	1.26763	0.919675	17.0321	3	1485	0.0298375	-5.06673
P61769;F5H6I0;H0YLF3	2	1	11.0556	0.0962487	1.01661	0.0467349	9.48809	0.381612	PF44	CF42	13828.6	Beta-2-microglobulin OS=Homo sapiens OX=9606 GN=B2M PE=1 SV=1		36.5344	70.0284	53.2814	1.72658	0.444504	2	1397	420.191	381.986	208.9	337.026	2.52766	0.334077	112.593	3	841	6.32539	2.66116
P13929;P13929-2;E5RGZ4;P13929-3;K7EKN2;K7EPM1;E5RG95;E5RI09	16	4	85.0518	0.5161	0.287266	0.16119	1.0164	0.0863237	PF44	CF42	47329.1	Beta-enolase OS=Homo sapiens OX=9606 GN=ENO3 PE=1 SV=5	4972.79	5371.02	5280.74	5208.18	3.71669	0.0400905	3	96	5317.83	5259.38	5303.54	5293.58	3.72375	0.00575607	30.4702	3	102	1.0164	0.023464
O95340;O95340-2;O43252	4	1	21.0889	0.594612	0.225766	0.17987	1.66479	0.073851	CF42	PF44	70071.1	Bifunctional 3'-phosphoadenosine 5'-phosphosulfate synthase 2 OS=Homo sapiens OX=9606 GN=PAPSS2 PE=1 SV=2		349.694	311.242	330.468	2.51913	0.0822754	2	855	134.592	137.294	125.122	132.336	2.12168	0.0482989	6.39169	3	1168	0.400451	-1.3203
P07814;V9GYZ6	13	3	64.3382	0.0444987	1.35165	0.026951	1.24992	0.589301	PF44	CF42	172188	Bifunctional glutamate/proline--tRNA ligase OS=Homo sapiens OX=9606 GN=EPRS PE=1 SV=5	123.826	145.346	127.984	132.385	2.12184	0.0862261	3	1183	160.116	184.801	151.496	165.471	2.21872	0.104466	17.2861	3	1098	1.24992	0.321838
P31939;P31939-2;H7C1S2;C9JLK0;F8WEF0	10	7	60.5132	0.228217	0.641652	0.0879176	1.17734	0.196738	PF44	CF42	65129.2	Bifunctional purine biosynthesis protein PURH OS=Homo sapiens OX=9606 GN=ATIC PE=1 SV=3	523.602	754.009	721.62	666.41	2.82374	0.187169	3	580	834.671	796.414	722.685	784.59	2.89464	0.0725495	56.9216	3	535	1.17734	0.235528
Q8NFC6	7	1	28.2707	0.00794305	2.10001	0.00832367	2.42043	0.94927	CF42	PF44	332634	Biorientation of chromosomes in cell division protein 1-like 1 OS=Homo sapiens OX=9606 GN=BOD1L1 PE=1 SV=2	165.181	179.304	163.781	169.422	2.22897	0.050681	3	1091	54.4383	58.0295	97.522	69.9966	1.84508	0.34152	23.9052	3	1332	0.41315	-1.27526
P80723;P80723-2	4	4	24.4308	0.139384	0.855787	0.0607612	1.05618	0.294269	CF42	PF44	22693.4	Brain acid soluble protein 1 OS=Homo sapiens OX=9606 GN=BASP1 PE=1 SV=2	1077.16	1081.01	1101.03	1086.4	3.03599	0.0117934	3	424	991.472	1005.08	1089.29	1028.61	3.01225	0.051512	52.9859	3	444	0.946809	-0.0788554
P54687;P54687-4;P54687-5;P54687-2;P54687-3	2	1	9.7816	0.0431115	1.36541	0.0264498	2.68834	0.598101	CF42	PF44	43536.5	Branched-chain-amino-acid aminotransferase_ cytosolic OS=Homo sapiens OX=9606 GN=BCAT1 PE=1 SV=3	171.516	126.502	64.5368	120.851	2.08225	0.444454	3	1208	55.7723	43.911	35.1785	44.9539	1.65277	0.229934	10.3364	3	1408	0.371977	-1.42671
Q9P287;Q9P287-2;Q9P287-3;Q9P287-4	2	1	6.5788	0.00115279	2.93825	0.00239855	1.23062	0.999943	PF44	CF42	36321.7	BRCA2 and CDKN1A-interacting protein OS=Homo sapiens OX=9606 GN=BCCIP PE=1 SV=1	41242	38625.1	40448.8	40105.3	4.6032	0.0334585	3	11	50907.7	48757.8	48397.7	49354.4	4.69333	0.0274997	1357.23	3	7	1.23062	0.299386
Q96CX2	3	2	24.0587	1.20708e-05	4.91826	0.000126801	2.54497	1	PF44	CF42	35986	BTB/POZ domain-containing protein KCTD12 OS=Homo sapiens OX=9606 GN=KCTD12 PE=1 SV=1	453.053	480.79	455.769	463.204	2.66577	0.0330102	3	728	1140.95	1249.94	1145.62	1178.84	3.07145	0.052272	61.6203	3	396	2.54497	1.34765
F5H2F4;P11586;V9GYY3	17	7	94.5753	0.00366829	2.43554	0.00487628	1.20503	0.992365	PF44	CF42	111412	C-1-tetrahydrofolate synthase_ cytoplasmic OS=Homo sapiens OX=9606 GN=MTHFD1 PE=1 SV=1	1139.77	1153.29	1236.45	1176.5	3.07059	0.0444992	3	398	1370.34	1433.1	1449.74	1417.72	3.15159	0.0295362	41.8742	3	344	1.20503	0.269072
A0A087X097;A0A0A0MQS6;Q9H251;Q9H251-2;Q9H251-3;Q9H251-4;Q9H251-8;A0A087WYR8;A0A0A0MS94;B1AVV0;Q8N5B3;Q9H251-6;R4GN92	10	2	35.8868	0.562336	0.250004	0.171876	1.07849	0.0785139	PF44	CF42	370295	Cadherin-23 OS=Homo sapiens OX=9606 GN=CDH23 PE=1 SV=1	301.176	296.514	214.331	270.673	2.43245	0.180475	3	927	256.12	294.072	325.563	291.919	2.46526	0.119113	34.7714	3	903	1.07849	0.109013
D6R938;E9PBG7;E9PF82;Q13557;Q13557-10;Q13557-11;Q13557-12;Q13557-3;Q13557-4;Q13557-5;Q13557-6;Q13557-8;Q13557-9;H0Y9J2;A0A2Q3DQE3;H7BXS4;Q13554;Q13554-2;Q13554-3;Q13554-4;Q13554-5;Q13554-6;Q13554-7;Q13554-8;Q13555;Q13555-10;Q13555-11;Q13555-2;Q13555-3;Q13555-4;Q13555-5;Q13555-6;Q13555-7;Q13555-8;Q13555-9;Q5SWX3;Q8WU40;Q9UQM7;Q9UQM7-2;D6RHX9;E7EQE4;E9PBE8;H0Y6G2;H0Y9C2	7	4	42.7678	0.00703364	2.15282	0.00776757	1.24426	0.960309	CF42	PF44	56925.7	Calcium/calmodulin-dependent protein kinase (CaM kinase) II delta_ isoform CRA_e OS=Homo sapiens OX=9606 GN=CAMK2D PE=1 SV=1	606.022	642.555	657.46	635.346	2.80301	0.041656	3	602	485.765	546.59	499.509	510.621	2.7081	0.0624708	31.8989	3	704	0.80369	-0.315289
Q6NUK1;Q6NUK1-2	2	1	10.6683	0.179004	0.747138	0.0733549	1.1683	0.241947	PF44	CF42	53582.7	Calcium-binding mitochondrial carrier protein SCaMC-1 OS=Homo sapiens OX=9606 GN=SLC25A24 PE=1 SV=2	160.747	126.208	172.641	153.199	2.18525	0.157439	3	1134	178.226	189.516	169.203	178.982	2.25281	0.056862	10.1773	3	1073	1.1683	0.224411
C9IYE1;Q86UW7;Q86UW7-2;Q86UW7-3;A0A087X1P3;F8W8P5;H7BYR4	4	1	17.3744	0.644655	0.190673	0.191879	1.05556	0.0677084	PF44	CF42	148839	Calcium-dependent secretion activator 2 OS=Homo sapiens OX=9606 GN=CADPS2 PE=1 SV=1	238.259	72.9528	107.3	139.504	2.14459	0.625298	3	1168	148.723	131.983	161.06	147.255	2.16807	0.0991063	14.5939	3	1132	1.05556	0.0780123
Q05682;E7EX44;Q05682-2;Q05682-3;Q05682-4;Q05682-5;Q05682-6;E9PGZ1;C9J813;C9JEK3;H0YCZ2;H0YEY7;Q8NG31;Q8NG31-2	24	16	206.704	0.000440475	3.35608	0.00132248	1.26644	1	CF42	PF44	93288.2	Caldesmon OS=Homo sapiens OX=9606 GN=CALD1 PE=1 SV=3	3824.58	3676.22	3844.41	3781.74	3.57769	0.0243055	3	146	2890.86	3064.73	3002.79	2986.13	3.47511	0.0295107	88.1228	3	182	0.789618	-0.340774
P0DP23;E7EMB3;E7ETZ0;H0Y7A7;P0DP24;P0DP25;Q96HY3;G3V361;M0QZ52;F8WBR5;G3V226;G3V479	9	7	51.8749	0.0837415	1.07706	0.0425115	1.13748	0.4171	PF44	CF42	16837.7	Calmodulin-1 OS=Homo sapiens OX=9606 GN=CALM1 PE=1 SV=1	2156.26	2379.78	2159.09	2231.71	3.34864	0.0574627	3	238	2545.61	2732.92	2337.01	2538.51	3.40458	0.0780166	198.046	3	212	1.13748	0.185835
P27824;P27824-2;P27824-3;H0Y9Q7;D6RAQ8;D6RAU8;D6RB85;D6RDP7;D6RFL1;D6RGY2;H0Y9H1;D6RD16;D6RHJ3	11	5	78.2901	0.00348303	2.45804	0.00479851	1.36443	0.993489	CF42	PF44	68024.6	Calnexin OS=Homo sapiens OX=9606 GN=CANX PE=1 SV=2	2149.67	1843.69	1881.14	1958.17	3.29185	0.0852341	3	268	1454.36	1397.83	1453.26	1435.15	3.1569	0.0225218	32.3221	3	340	0.732904	-0.448303
A0A0C4DGQ5;P04632;K7EIV0;K7EKD8;K7ELJ7;A0A075B7C0;U3KQE2;K7EM73;K7EMQ1;U3KPR7	7	3	45.657	0.950357	0.0221132	0.257754	1.04133	0.0503118	CF42	PF44	34071.3	Calpain small subunit 1 OS=Homo sapiens OX=9606 GN=CAPNS1 PE=1 SV=1	606.384	1298.18	1352.88	1085.81	3.03576	0.383213	3	425	1162.04	979.083	987.026	1042.72	3.01817	0.0991782	103.415	3	441	0.960309	-0.0584295
P07384;E9PJA6;E9PJJ3;E9PLC9;E9PLX0;E9PMC6;E9PQB3;E9PRM1;E9PSA6;E9PIA9	10	2	56.3527	0.0169472	1.7709	0.0137759	3.32941	0.833232	CF42	PF44	82517.5	Calpain-1 catalytic subunit OS=Homo sapiens OX=9606 GN=CAPN1 PE=1 SV=1	258.888	246.998	237.331	247.739	2.39399	0.043584	3	958	94.2291	93.8409	35.1579	74.4093	1.87163	0.456841	33.9932	3	1315	0.300354	-1.73527
P17655;P17655-2	17	10	109.797	0.0449183	1.34758	0.0270954	1.2273	0.586692	CF42	PF44	80850.9	Calpain-2 catalytic subunit OS=Homo sapiens OX=9606 GN=CAPN2 PE=1 SV=6	1426.26	1505.41	1387.73	1439.8	3.1583	0.0416725	3	342	1273.31	1225.83	1020.29	1173.14	3.06935	0.114637	134.485	3	397	0.814795	-0.295492
A0A0A0MR45;A0A0C4DGB5;B7Z574;E7EQ12;E7EQA0;E7EVY3;E9PCH5;E9PDE4;H0Y9H6;H0YD33;P20810;P20810-10;P20810-2;P20810-3;P20810-4;P20810-5;P20810-6;P20810-7;P20810-8;P20810-9;E7ES10;H0Y7F0;A0A0C4DGD1;D6RAA8;F8W7E0	4	3	23.9959	0.000452505	3.34438	0.00133487	1.70438	1	PF44	CF42	47442.1	Calpastatin OS=Homo sapiens OX=9606 GN=CAST PE=1 SV=1	340.532	307.457	354.566	334.185	2.52399	0.0723775	3	852	552.411	555.125	601.202	569.579	2.75555	0.0481399	27.4195	3	656	1.70438	0.769249
B4DDF4;B4DUT8;Q99439;A0A087X271;Q99439-2;A0A087X1X5;H3BVI6;K7ES69;H3BQH0;U3KPS3	9	5	65.3326	0.0052376	2.28087	0.00626613	1.08228	0.979722	CF42	PF44	33016	Calponin OS=Homo sapiens OX=9606 GN=CNN2 PE=1 SV=1	2311.06	2384.6	2303.71	2333.12	3.36794	0.0191736	3	226	2185.68	2118.81	2162.78	2155.75	3.3336	0.0157653	33.9862	3	246	0.923978	-0.11407
Q15417;Q15417-3;Q15417-2;E9PDU6	8	5	52.2342	0.00696325	2.15719	0.00770961	1.08269	0.961137	CF42	PF44	36584.9	Calponin-3 OS=Homo sapiens OX=9606 GN=CNN3 PE=1 SV=1	1146.39	1129.69	1150.27	1142.12	3.05771	0.00957404	3	408	1024.5	1072.75	1067.42	1054.89	3.02321	0.0250813	26.4581	3	439	0.923628	-0.114617
P27797;K7EJB9;K7EL50	18	11	118.356	0.0203421	1.6916	0.015673	1.11403	0.793353	PF44	CF42	48312.7	Calreticulin OS=Homo sapiens OX=9606 GN=CALR PE=1 SV=1	3762.51	3878.8	3723.32	3788.21	3.57843	0.0213457	3	145	4094.1	4442.41	4124.07	4220.19	3.62533	0.0457387	193.026	3	131	1.11403	0.155793
O43852;O43852-3;O43852-2;O43852-4;O43852-5;H0Y875;O43852-10;O43852-11;O43852-13;O43852-14;O43852-15;O43852-6;O43852-9;O43852-12;O43852-7;O43852-8	8	5	71.1204	0.27357	0.562932	0.0997673	1.07042	0.166672	CF42	PF44	37220.9	Calumenin OS=Homo sapiens OX=9606 GN=CALU PE=1 SV=2	1477.34	1557.56	1525.9	1520.27	3.18192	0.0265781	3	327	1371.38	1572.35	1317	1420.25	3.15236	0.0947044	134.504	3	343	0.93421	-0.098182
P13861;P13861-2;C9J830;H7C330	3	1	16.5611	0.229943	0.63838	0.0880593	1.59169	0.195426	CF42	PF44	45860.6	cAMP-dependent protein kinase type II-alpha regulatory subunit OS=Homo sapiens OX=9606 GN=PRKAR2A PE=1 SV=2	87.882	107.806	114.621	103.436	2.01467	0.134331	3	1249	55.4795	115.411	24.0648	64.9852	1.81281	0.71415	46.4091	3	1348	0.628263	-0.670559
P30622;P30622-1;P30622-2;F5H0N7;F5H6A0;J3KP58	10	1	46.9102	0.14646	0.83428	0.0627659	1.73769	0.283462	CF42	PF44	162988	CAP-Gly domain-containing linker protein 1 OS=Homo sapiens OX=9606 GN=CLIP1 PE=1 SV=2	76.8375	174.316	107.307	119.487	2.07732	0.417347	3	1214	82.0596	48.249	75.9768	68.7618	1.83735	0.262109	18.0231	3	1337	0.575476	-0.797172
P16152;A8MTM1;E9PQ63;P16152-2	10	4	66.979	0.98829	0.00511574	0.265534	1.00256	0.0500173	PF44	CF42	30660.1	Carbonyl reductase [NADPH] 1 OS=Homo sapiens OX=9606 GN=CBR1 PE=1 SV=3	1971.22	1959.68	2007.35	1979.42	3.29654	0.0125634	3	265	2195.7	1971.16	1786.6	1984.49	3.29765	0.103238	204.876	3	263	1.00256	0.00369155
O75828	5	1	33.1314	0.0556982	1.25416	0.0315644	1.37429	0.526935	CF42	PF44	31249.5	Carbonyl reductase [NADPH] 3 OS=Homo sapiens OX=9606 GN=CBR3 PE=1 SV=3	169.876	137.927	141.25	149.684	2.17518	0.117347	3	1144	88.5369	113.986	124.229	108.917	2.0371	0.168733	18.3779	3	1225	0.727646	-0.458691
Q8N3K9	12	2	42.5609	0.421306	0.375403	0.137883	1.12564	0.107757	CF42	PF44	451036	Cardiomyopathy-associated protein 5 OS=Homo sapiens OX=9606 GN=CMYA5 PE=1 SV=3	210.141	282.697	272.668	255.169	2.40683	0.154078	3	949	263.401	190.185	226.476	226.687	2.35543	0.161494	36.6087	3	994	0.888382	-0.170748
P50416;P50416-2;H3BMD2	7	5	34.4283	0.00237203	2.62488	0.00395781	3.97646	0.998286	PF44	CF42	89052.2	Carnitine O-palmitoyltransferase 1_ liver isoform OS=Homo sapiens OX=9606 GN=CPT1A PE=1 SV=2	84.119	170.554	132.247	128.973	2.1105	0.335808	3	1187	501.519	507.69	529.363	512.857	2.71	0.0285145	14.6239	3	703	3.97646	1.99149
C9JP16;O75718	2	1	10.5906	0.370576	0.431123	0.125581	1.52015	0.123389	CF42	PF44	41946.3	Cartilage-associated protein OS=Homo sapiens OX=9606 GN=CRTAP PE=1 SV=1	168.955	176.845	189.61	178.47	2.25157	0.0584007	3	1076		191.711	160.498	176.104	2.24577	0.125327	22.0705	2	1078	0.986745	-0.0192509
A0A2U3TZY2;Q9H078;Q9H078-2;H0YGM0;Q9H078-3;Q9H078-4;A0A2R8Y602;A0A2R8Y6R5;F5H392;F5H7A5;Q9H078-5;A0A2R8Y7E8;A0A2R8YDH5	4	2	18.8777	0.13479	0.870341	0.059179	1.26741	0.301706	CF42	PF44	77366.1	Caseinolytic peptidase B protein homolog OS=Homo sapiens OX=9606 GN=CLPB PE=1 SV=1	163.054	201.318	208.523	190.965	2.28095	0.127976	3	1053	159.36	171.046	121.615	150.674	2.17804	0.171465	25.8353	3	1123	0.789013	-0.341879
P04040	5	1	22.8636	0.229286	0.639622	0.0880593	1.23775	0.195924	CF42	PF44	59984.4	Catalase OS=Homo sapiens OX=9606 GN=CAT PE=1 SV=3	114.374	108.683	81.1127	101.39	2.00599	0.175456	3	1259	72.6435	100.151	72.9487	81.9145	1.91336	0.192814	15.7943	3	1293	0.807918	-0.307719
P21964;P21964-2;E7EMS6	3	1	16.5257	0.00377214	2.42341	0.0049507	1.82214	0.991697	CF42	PF44	30493.3	Catechol O-methyltransferase OS=Homo sapiens OX=9606 GN=COMT PE=1 SV=2	1148.5	1103.36	1002.82	1084.89	3.03539	0.0687384	3	428	706.972	556.336	522.878	595.395	2.77481	0.164707	98.0659	3	631	0.548805	-0.865634
C9JZR2;O60716;O60716-10;O60716-11;O60716-13;O60716-17;O60716-18;O60716-19;O60716-2;O60716-21;O60716-25;O60716-26;O60716-27;O60716-29;O60716-3;O60716-5;O60716-9;O60716-12;O60716-14;O60716-15;O60716-16;O60716-20;O60716-22;O60716-23;O60716-24;O60716-28;O60716-30;O60716-31;O60716-32;O60716-4;O60716-6;O60716-7;O60716-8;E9PKY0	3	1	13.0986	0.00282262	2.54935	0.00425066	2.83469	0.996751	CF42	PF44	105419	Catenin delta-1 OS=Homo sapiens OX=9606 GN=CTNND1 PE=1 SV=2	272.011	387.802	356.575	338.796	2.52994	0.176827	3	846	135.171	93.1336	130.249	119.518	2.07743	0.192286	22.9816	3	1202	0.352772	-1.50319
P07858;E9PHZ5;E9PKQ7;E9PLY3;E9PNL5;E9PQM1;E9PSG5;E9PCB3;E9PJ67;E9PR54;E9PS78;R4GMQ5	13	7	79.0757	1.35225e-05	4.86894	0.000132366	1.93097	1	PF44	CF42	38791.1	Cathepsin B OS=Homo sapiens OX=9606 GN=CTSB PE=1 SV=3	3501.67	3218.05	3434.97	3384.9	3.52955	0.0438092	3	165	6548.32	6537.64	6522.49	6536.15	3.81532	0.00198579	12.9794	3	83	1.93097	0.949329
P07339;A0A1B0GV23;A0A1B0GVD5;A0A1B0GW44;A0A1B0GWE8;A0A1B0GU03;A0A1B0GU92;A0A1B0GVP3;C9JH19;F8WD96;H7C469;F8W787;H7C1V0	11	6	67.014	0.124719	0.904067	0.0561882	1.18374	0.319312	PF44	CF42	45065.5	Cathepsin D OS=Homo sapiens OX=9606 GN=CTSD PE=1 SV=1	2013.79	2641.29	2262.89	2305.99	3.36286	0.137019	3	228	2799.17	2882.94	2506.95	2729.69	3.43611	0.0723135	197.393	3	198	1.18374	0.243348
P43235	2	1	10.2847	0.490056	0.309755	0.155293	1.12718	0.0914027	CF42	PF44	37422.3	Cathepsin K OS=Homo sapiens OX=9606 GN=CTSK PE=1 SV=1	412.988	369.817	322.182	368.329	2.56624	0.123316	3	799	229.569	327.199	423.541	326.769	2.51424	0.296805	96.9867	3	854	0.887167	-0.172722
P07711;Q5T8F0	6	2	37.0684	0.526238	0.278818	0.163232	1.04421	0.0844861	PF44	CF42	38020.5	Cathepsin L1 OS=Homo sapiens OX=9606 GN=CTSL PE=1 SV=2	835.778	900.936	782.311	839.675	2.92411	0.0707512	3	504	928.176	903.716	798.505	876.799	2.9429	0.07858	68.8989	3	502	1.04421	0.0624149
Q9UBR2	4	2	24.8332	0.0057195	2.24264	0.00667577	1.94325	0.974921	PF44	CF42	34552.3	Cathepsin Z OS=Homo sapiens OX=9606 GN=CTSZ PE=1 SV=1	108.018	93.232	104.083	101.778	2.00765	0.0752404	3	1258	203.21	157.968	232.159	197.779	2.29618	0.189062	37.3924	3	1048	1.94325	0.958469
P11717	14	2	55.8295	0.00472513	2.32559	0.00586481	1.65372	0.984404	PF44	CF42	281332	Cation-independent mannose-6-phosphate receptor OS=Homo sapiens OX=9606 GN=IGF2R PE=1 SV=3	132.323	159.631	164.697	152.217	2.18246	0.1144	3	1138	274.944	226.266	253.962	251.724	2.40092	0.0969956	24.4161	3	950	1.65372	0.725714
Q6NZI2;Q6NZI2-2;Q6NZI2-3	13	9	78.4742	0.00171597	2.76549	0.00321156	1.34808	0.999563	CF42	PF44	43476.2	Caveolae-associated protein 1 OS=Homo sapiens OX=9606 GN=CAVIN1 PE=1 SV=1	6041.72	5862.51	5930.93	5945.05	3.77416	0.0152126	3	84	4182.36	4292.21	4755.5	4410.02	3.64444	0.0689774	304.192	3	122	0.741797	-0.430904
E9PIE3;Q969G5	3	1	19.8799	0.430191	0.366339	0.139689	1.19123	0.105366	CF42	PF44	31145.1	Caveolae-associated protein 3 OS=Homo sapiens OX=9606 GN=CAVIN3 PE=1 SV=1	57.113	64.4404	50.7321	57.4285	1.75913	0.119446	3	1383	27.8521	53.0239	63.7519	48.2093	1.68313	0.382246	18.4278	3	1396	0.839466	-0.252456
Q03135;E9PCT5;C9JKI3;Q03135-2;P56539	5	4	35.6566	0.00792008	2.10127	0.00831985	1.56515	0.949556	CF42	PF44	20642.7	Caveolin-1 OS=Homo sapiens OX=9606 GN=CAV1 PE=1 SV=4	1295.94	1745.6	1606.28	1549.28	3.19013	0.148578	3	321	976.649	1012.78	980.137	989.856	2.99557	0.0201358	19.9316	3	458	0.638916	-0.646302
A5YKK6;A5YKK6-2;A5YKK6-3;A5YKK6-4;H3BNB1;H3BR89;H3BTH2	8	1	34.1901	0.697605	0.15639	0.20301	1.0502	0.0624423	CF42	PF44	269278	CCR4-NOT transcription complex subunit 1 OS=Homo sapiens OX=9606 GN=CNOT1 PE=1 SV=2	1644.59	1393.88	1218.2	1418.89	3.15195	0.151027	3	348	1542.69	1248.84	1261.66	1351.07	3.13068	0.122922	166.076	3	358	0.952199	-0.0706657
P16070;P16070-10;P16070-11;P16070-12;P16070-13;P16070-14;P16070-16;P16070-17;P16070-18;P16070-3;P16070-4;P16070-5;P16070-6;P16070-7;P16070-8;H0Y2P0;H0YD13;H0YE40;H0Y5E4;H0YCV9;H0YDW7;P16070-15;P16070-9;H0YD17;H0YDX6;E9PKC6;J3KN83;P16070-19;Q86UZ1	11	8	75.7791	0.173723	0.760142	0.0720826	1.05736	0.247907	CF42	PF44	82051	CD44 antigen OS=Homo sapiens OX=9606 GN=CD44 PE=1 SV=3	4071.53	3961.07	4068.98	4033.86	3.60572	0.0156297	3	134	3980.45	3893.73	3570.87	3815.02	3.5815	0.0565765	215.84	3	140	0.945748	-0.0804723
A0A2U3TZL5;E9PNW4;E9PR17;P13987;H0YET2	2	2	16.0267	0.0220598	1.6564	0.0162689	1.3554	0.7744	CF42	PF44	13970.7	CD59 glycoprotein (Fragment) OS=Homo sapiens OX=9606 GN=CD59 PE=4 SV=1	1343.45	1180.59	1128.71	1217.58	3.0855	0.0920253	3	391	834.777	1020.41	839.763	898.316	2.95343	0.117736	105.764	3	491	0.737787	-0.438723
P08962;P08962-2;F8VWK8;F8W022;F8VNT9;F8VV56;P08962-3	9	5	43.7107	0.000716359	3.14487	0.00183373	1.48324	0.999997	CF42	PF44	26492.1	CD63 antigen OS=Homo sapiens OX=9606 GN=CD63 PE=1 SV=2	1919.45	2006.53	1852.59	1926.19	3.2847	0.0400734	3	273	1230.96	1386.68	1278.26	1298.63	3.11349	0.0614738	79.832	3	371	0.674198	-0.568755
Q96SN8;Q96SN8-3;A0A0A0MRG9;Q96SN8-2;B1AMJ5;Q96SN8-4;F8WCI3;Q5JTU8;F8WF55;C9K0C9;F8W9E7;Q96BJ8;Q96BJ8-2;Q96BJ8-3	15	1	63.0205	0.0130893	1.88308	0.0115998	1.19835	0.882121	PF44	CF42	216578	CDK5 regulatory subunit-associated protein 2 OS=Homo sapiens OX=9606 GN=CDK5RAP2 PE=1 SV=5	251.676	237.339	255.338	248.117	2.39466	0.0383375	3	957	290.768	318.484	282.74	297.331	2.47324	0.0630748	18.7541	3	894	1.19835	0.261046
B4DHN5;E9PBU7;G5EA09;O00560;O00560-2;O00560-3	4	1	18.3096	0.557995	0.25337	0.17105	1.04625	0.0791877	PF44	CF42	26081.9	cDNA FLJ55055_ moderately similar to Syntenin-1 OS=Homo sapiens OX=9606 GN=SDCBP PE=1 SV=1	386.885	442.227	352.24	393.784	2.59526	0.115262	3	771	441.628	403.983	390.376	411.996	2.61489	0.0644401	26.549	3	772	1.04625	0.0652244
B4DDD6;Q9UJU6;Q9UJU6-2;Q9UJU6-3;H0Y5J4;Q9UJU6-4;Q9UJU6-5;Q9UJU6-6;F8WBG8;F2Z2V3;F2Z3E3;F8WB73;F8WBB2;F8WC20;F8WCK3;F8WFE1	7	5	44.0796	0.00819954	2.08621	0.00855085	1.17842	0.946061	CF42	PF44	45974.6	cDNA FLJ59450_ highly similar to Drebrin-like protein OS=Homo sapiens OX=9606 GN=DBNL PE=1 SV=1	646.393	687.292	702.094	678.593	2.83161	0.0425163	3	569	599.596	573.791	554.167	575.852	2.76031	0.0395668	22.7846	3	651	0.848596	-0.23685
B4DR61;P61619;F8W776;P61619-3;Q8TC24;Q9H9S3;Q9H9S3-2;Q9H9S3-3;C9JJV4;H7C1S8;A6NIF9;A6NK38;C9JXC6;F2Z2C7;H0Y2V8;H7C069;H7C1Q9;Q14957	5	4	27.2173	0.0209444	1.67893	0.0159613	1.09778	0.786614	PF44	CF42	53405.9	cDNA FLJ59739_ highly similar to Protein transport protein Sec61 subunit alpha isoform 1 OS=Homo sapiens OX=9606 GN=SEC61A1 PE=1 SV=1	304.522	283.018	291.203	292.914	2.46674	0.0370529	3	903	330.277	315.894	318.493	321.555	2.50725	0.023837	7.66491	3	863	1.09778	0.134586
B7ZAR1;E9PCA1;P48643;E7ENZ3;P48643-2	15	8	94.5219	0.178305	0.748837	0.0732776	1.2881	0.242721	CF42	PF44	55805.3	cDNA_ FLJ79275_ highly similar to T-complex protein 1 subunit epsilon OS=Homo sapiens OX=9606 GN=CCT5 PE=1 SV=1	1370.88	1487.02	935.615	1264.5	3.10192	0.229881	3	382	971.629	966.013	1007.41	981.684	2.99197	0.0228739	22.455	3	464	0.776339	-0.365242
Q8N163;H0YB24;G3V119;Q8N163-2;A0A087X2B6	6	1	35.9132	0.620833	0.207025	0.186464	23.7766	0.070479	PF44	CF42	103529	Cell cycle and apoptosis regulator protein 2 OS=Homo sapiens OX=9606 GN=CCAR2 PE=1 SV=2	32.947	49.1115	303.2	128.419	2.10863	1.18035	3	1189	9160.13			9160.13	3.9619	#DIV/0!	#DIV/0!	1	62	71.3298	6.15643
P60953;P60953-1;Q5JYX0	4	3	30.2916	0.913229	0.0394204	0.250258	1.00563	0.0509563	PF44	CF42	21600.8	Cell division control protein 42 homolog OS=Homo sapiens OX=9606 GN=CDC42 PE=1 SV=2	877.718	975.226	783.343	878.762	2.94387	0.109183	3	488	822.901	911.368	916.866	883.711	2.94631	0.0596748	52.7353	3	498	1.00563	0.00810258
Q7Z7A1;Q7Z7A1-5;Q7Z7A1-2;Q7Z7A1-3;Q5JVD1;Q5JVD6;Q5JVD5;Q7Z7A1-4	18	2	83.6608	0.361339	0.442085	0.123907	1.09006	0.126651	CF42	PF44	270027	Centriolin OS=Homo sapiens OX=9606 GN=CNTRL PE=1 SV=2	205.659	234.689	268.525	236.291	2.37345	0.133157	3	974	216.608	221.908	211.792	216.769	2.336	0.0233433	5.06011	3	1011	0.917383	-0.124404
P49454;A0A087WTY4	27	3	100.403	0.236495	0.626179	0.0895053	1.24835	0.19058	PF44	CF42	371073	Centromere protein F OS=Homo sapiens OX=9606 GN=CENPF PE=1 SV=2	90.1558	116.515	84.0849	96.9186	1.98641	0.177886	3	1271	94.8893	124.906	143.169	120.988	2.08274	0.201483	24.3771	3	1198	1.24835	0.320019
Q5SW79;Q5SW79-2;Q5SW79-3;H0Y2V6;E5RFU8;E5RIH6;E5RJT5;E7EMW0;E7EWM2;Q96L14	9	2	43.6418	0.235204	0.628555	0.0893309	1.27136	0.191517	CF42	PF44	175692	Centrosomal protein of 170 kDa OS=Homo sapiens OX=9606 GN=CEP170 PE=1 SV=1	201.756	125.313	163.539	163.536	2.21361	0.233718	3	1111	118.64	114.73	152.522	128.631	2.10934	0.161566	20.7824	3	1183	0.786559	-0.346373
Q9C0D2;Q9C0D2-3	9	3	31.211	0.520235	0.2838	0.162012	1.15215	0.0855651	PF44	CF42	296716	Centrosomal protein of 295 kDa OS=Homo sapiens OX=9606 GN=CEP295 PE=1 SV=4	29.4942	53.4607	37.1503	40.0351	1.60244	0.305755	3	1433	50.4701	53.2497	34.6592	46.1263	1.66395	0.217394	10.0276	3	1405	1.15215	0.204327
Q9BV73;Q9BV73-2;E7ETF9;H0Y5R2;A6PVI9;E9PHT2;H7C0P0	8	4	32.4124	0.228752	0.640636	0.0880448	1.06648	0.19633	PF44	CF42	282050	Centrosome-associated protein CEP250 OS=Homo sapiens OX=9606 GN=CEP250 PE=1 SV=2	278.148	279.676	247.381	268.402	2.42879	0.0678858	3	932	283.481	298.778	276.479	286.246	2.45674	0.0398391	11.4038	3	911	1.06648	0.0928628
O00299	17	13	144.12	0.00244083	2.61246	0.00400912	1.27688	0.998088	PF44	CF42	27264.9	Chloride intracellular channel protein 1 OS=Homo sapiens OX=9606 GN=CLIC1 PE=1 SV=4	7622.22	6786.46	7160.05	7189.58	3.8567	0.0582322	3	66	9349.04	9245.72	8945.93	9180.23	3.96285	0.0228078	209.381	3	61	1.27688	0.352623
Q9Y696	12	6	60.2879	0.669311	0.174372	0.197309	1.00858	0.0651107	PF44	CF42	29000.3	Chloride intracellular channel protein 4 OS=Homo sapiens OX=9606 GN=CLIC4 PE=1 SV=4	1518.41	1523.58	1579.94	1540.64	3.1877	0.0221547	3	322	1526.68	1539.61	1595.28	1553.86	3.19141	0.0234571	36.4491	3	322	1.00858	0.0123229
Q6UVK1	6	1	21.8916	0.0141589	1.84897	0.01227	1.5876	0.868246	PF44	CF42	251221	Chondroitin sulfate proteoglycan 4 OS=Homo sapiens OX=9606 GN=CSPG4 PE=1 SV=2	227.24	164.944	165.192	185.792	2.26903	0.193201	3	1060	272.223	305.549	307.116	294.962	2.46977	0.066817	19.7085	3	900	1.5876	0.666844
A0A0A0MRH8;A0A0A0MSH9;Q86WJ1;Q86WJ1-2;Q86WJ1-3;Q86WJ1-4;Q86WJ1-5	3	1	10.6234	0.000190794	3.71944	0.000747035	44.2233	1	CF42	PF44	69325.7	Chromodomain-helicase-DNA-binding protein 1-like OS=Homo sapiens OX=9606 GN=CHD1L PE=1 SV=1	404.546	386.594	303.658	364.933	2.56221	0.147477	3	804	7.24723	4.81555	12.6934	8.25205	0.916562	0.488835	4.03389	3	1508	0.0226125	-5.46673
A0A0C4DGG9;A0A2R8Y212;A0A2R8Y425;A0A2R8Y521;A0A2R8Y5J0;A0A2R8YFD8;A0A2R8YFK9;A0A2U3TZM0;F5GWX5;Q14839;Q14839-2;A0A2R8Y4X2;A0A2R8Y5M9;A0A2R8Y7I0;A0A2R8Y7M9;A0A2R8Y8C1;A0A2R8YD40;A0A2R8YDJ9;A0A2R8YDW2;A0A2R8YE38;A0A2R8YER1;A0A2R8Y7X1	4	1	24.6507	0.0597071	1.22397	0.0333836	1.71986	0.507771	PF44	CF42	222073	Chromodomain-helicase-DNA-binding protein 4 OS=Homo sapiens OX=9606 GN=CHD4 PE=1 SV=1	115.767	159.842	74.0279	116.545	2.0665	0.368201	3	1221	208.587	186.15	206.589	200.442	2.30199	0.0619528	12.4179	3	1044	1.71986	0.782293
Q96N23;A0A1B0GU80	6	1	20.2673	0.562683	0.249736	0.171876	1.87129	0.0784604	CF42	PF44	356247	Cilia- and flagella-associated protein 54 OS=Homo sapiens OX=9606 GN=CFAP54 PE=2 SV=3	13.5425	92.0739	32.827	46.1478	1.66415	0.88683	3	1422	19.0115	21.5284	33.4431	24.661	1.39201	0.312596	7.70893	3	1465	0.534391	-0.904033
A0A087WVY5;Q96MR6	2	1	8.2279	0.0137344	1.86219	0.0120242	26.6563	0.873729	PF44	CF42	150000	Cilia- and flagella-associated protein 57 OS=Homo sapiens OX=9606 GN=CFAP57 PE=1 SV=1			9.33423	9.33423	0.970078	#DIV/0!	1	1511	71.5654	101.32	75.9303	82.9386	1.91876	0.193731	16.0677	3	1292	8.88543	3.15144
O75390;A0A0C4DGI3;B4DJV2;F8VTT8;F8W1S4;F8W4S1;H0YIC4;F8VPA1;F8VPF9;F8VRP1;F8VWQ5;F8VX07;F8VX68;F8VZK9;F8W642;H0YH82;F8VR34;F8VRI6;F8VU34;F8VVY4;F8W0J2	10	4	64.9008	0.230016	0.638242	0.0880593	1.20141	0.195371	CF42	PF44	51940.7	Citrate synthase_ mitochondrial OS=Homo sapiens OX=9606 GN=CS PE=1 SV=2	407.596	343.61	512.485	421.231	2.62452	0.202405	3	748	367.204	326.98	357.655	350.613	2.54483	0.0599416	21.0163	3	823	0.832354	-0.264731
Q00610;A0A087WVQ6;Q00610-2;J3KS13;K7EJJ5;J3KSQ2;J3QL20	51	30	334.163	0.27145	0.56631	0.0993946	1.04434	0.167897	CF42	PF44	193383	Clathrin heavy chain 1 OS=Homo sapiens OX=9606 GN=CLTC PE=1 SV=5	5861.26	5437.51	5323.69	5540.82	3.74357	0.0511273	3	92	5418.15	5365.23	5133.26	5305.55	3.72473	0.0285607	151.53	3	101	0.957538	-0.0625977
F8WJN3;Q16630;Q16630-2;Q16630-3	1	1	3.7384	0.0763929	1.11695	0.0397848	7.50496	0.441171	CF42	PF44	52441	Cleavage and polyadenylation-specificity factor subunit 6 OS=Homo sapiens OX=9606 GN=CPSF6 PE=1 SV=1	42.6209	56.5643	95.2709	64.8187	1.8117	0.42084	3	1356		12.4146	13.4958	12.9552	1.11244	0.0590154	0.764555	2	1499	0.199868	-2.32288
M0QXB4;O14579;O14579-2;M0R061;O14579-3	2	1	8.4011	0.372869	0.428443	0.125581	1.14761	0.122601	PF44	CF42	37094.9	Coatomer protein complex_ subunit epsilon_ isoform CRA_g OS=Homo sapiens OX=9606 GN=COPE PE=1 SV=1	294.459	359.369	252.3	302.043	2.48007	0.17857	3	887	408.941	296.278	334.661	346.626	2.53986	0.165241	57.2768	3	833	1.14761	0.19863
P53621;P53621-2	21	14	103.965	0.754724	0.122212	0.215905	1.02777	0.0579733	PF44	CF42	139886	Coatomer subunit alpha OS=Homo sapiens OX=9606 GN=COPA PE=1 SV=2	1118.61	900.406	952.153	990.388	2.99581	0.115121	3	447	1044.63	1097.65	911.384	1017.89	3.0077	0.0942847	95.9714	3	447	1.02777	0.0395163
P53618;E9PP73;E9PKQ1;E9PP63	20	10	112.695	0.0311796	1.50613	0.0211479	1.12658	0.686652	PF44	CF42	108283	Coatomer subunit beta OS=Homo sapiens OX=9606 GN=COPB1 PE=1 SV=3	561.5	625.517	600.522	595.846	2.77513	0.0541475	3	625	651.879	695.555	666.365	671.266	2.82689	0.0331414	22.2467	3	588	1.12658	0.171945
P35606;P35606-2;D6R997;D6RBG7;D6RBT6;D6RBZ7;D6RCL6;H0YAC7;H0Y938	15	8	98.7774	0.0501429	1.29979	0.0294087	1.14361	0.556082	PF44	CF42	103343	Coatomer subunit beta' OS=Homo sapiens OX=9606 GN=COPB2 PE=1 SV=2	1271.19	1097.43	1122.54	1163.72	3.06585	0.0807007	3	402	1374.65	1324.78	1293.11	1330.84	3.12413	0.0308865	41.1051	3	363	1.14361	0.193596
P48444;B0YIW6;P48444-2;Q6P1Q5;E9PK34	12	3	75.1341	0.45214	0.344727	0.145107	1.0477	0.099835	PF44	CF42	57666.7	Coatomer subunit delta OS=Homo sapiens OX=9606 GN=ARCN1 PE=1 SV=1	606.108	514.015	600.407	573.51	2.75854	0.0899782	3	644	628.649	594.973	578.976	600.866	2.77878	0.0421977	25.3552	3	626	1.0477	0.0672247
Q9Y678;H0Y8X7	22	14	136.452	0.000495518	3.30494	0.00141434	1.85097	1	PF44	CF42	99030.1	Coatomer subunit gamma-1 OS=Homo sapiens OX=9606 GN=COPG1 PE=1 SV=1	751.963	799.058	804.849	785.29	2.89503	0.0369378	3	526	1308.2	1470.74	1581.7	1453.55	3.16243	0.0946375	137.56	3	335	1.85097	0.888279
P23528;E9PK25;E9PP50;G3V1A4;E9PQB7;E9PLJ3;E9PS23;G3V2U0	15	4	76.2406	0.00575667	2.23983	0.00670099	1.45856	0.974536	PF44	CF42	18730.6	Cofilin-1 OS=Homo sapiens OX=9606 GN=CFL1 PE=1 SV=3	2130.31	2695.32	2356.75	2394.13	3.37915	0.118772	3	223	3361.75	3522.2	3592.01	3491.99	3.54307	0.0338105	118.066	3	151	1.45856	0.544549
Q9Y281;Q9Y281-3;F8WDN3	6	2	48.8208	2.96121e-07	6.52853	1.06282e-05	2.72699	1	PF44	CF42	18850.7	Cofilin-2 OS=Homo sapiens OX=9606 GN=CFL2 PE=1 SV=1	563.572	568.354	551.491	561.139	2.74907	0.0154872	3	651	1542.8	1553.55	1494.32	1530.22	3.18475	0.0206221	31.5563	3	324	2.72699	1.44731
Q6P1N0;Q6P1N0-2	2	1	11.7354	0.300262	0.522499	0.107948	1.15721	0.152454	PF44	CF42	104462	Coiled-coil and C2 domain-containing protein 1A OS=Homo sapiens OX=9606 GN=CC2D1A PE=1 SV=1	93.2306	74.8134	115.798	94.6141	1.97596	0.21696	3	1278	102.946	119.669	105.852	109.489	2.03937	0.0816066	8.935	3	1223	1.15721	0.210656
Q6ZP82;E7ERF0;Q6ZP82-2;A0A0A6YYF7;C9JR62;B8ZZB3	7	1	30.0249	0.256026	0.591717	0.0951562	2.91697	0.1773	CF42	PF44	167288	Coiled-coil domain-containing protein 141 OS=Homo sapiens OX=9606 GN=CCDC141 PE=1 SV=2	26.7833	85.8007	25.002	45.862	1.66145	0.754425	3	1423	26.2573	20.9101		23.5837	1.37261	0.160324	3.78104	2	1468	0.514232	-0.959509
Q6TFL3;Q6TFL3-4;Q6TFL3-3;H0Y701;H0Y5M5	9	1	39.8549	0.015631	1.80601	0.0130722	28.0068	0.849528	PF44	CF42	154179	Coiled-coil domain-containing protein 171 OS=Homo sapiens OX=9606 GN=CCDC171 PE=2 SV=1			13.0652	13.0652	1.11612	#DIV/0!	1	1504	105.153	132.467	128.296	121.972	2.08626	0.120636	14.7142	3	1196	9.3356	3.22274
Q2M243;J3QKX2	7	1	26.9359	0.00643185	2.19166	0.00731026	1.81513	0.967238	CF42	PF44	75867.9	Coiled-coil domain-containing protein 27 OS=Homo sapiens OX=9606 GN=CCDC27 PE=2 SV=2	284.82	217.381	255.981	252.727	2.40265	0.133888	3	954	162.759	123.915	131.027	139.234	2.14374	0.148537	20.6814	3	1153	0.550925	-0.860073
Q2TAC2;Q2TAC2-2	7	1	29.4282	0.429608	0.366928	0.139645	1.18898	0.10552	PF44	CF42	103452	Coiled-coil domain-containing protein 57 OS=Homo sapiens OX=9606 GN=CCDC57 PE=1 SV=2	50.3983	87.238	36.0881	57.9081	1.76274	0.455703	3	1381	63.9967	79.3008	63.2576	68.8517	1.83791	0.13154	9.05673	3	1336	1.18898	0.249727
Q6ZRK6	2	1	6.58	0.0529659	1.276	0.0305793	1.21288	0.540869	CF42	PF44	125124	Coiled-coil domain-containing protein 73 OS=Homo sapiens OX=9606 GN=CCDC73 PE=2 SV=2	387.098	305.833	339.062	343.998	2.53656	0.118769	3	834	288.118	285.898	276.845	283.62	2.45274	0.0210551	5.97165	3	914	0.824482	-0.27844
O75534;O75534-2;O75534-3;O75534-4;E9PLT0;E9PLD4;E9PKN4	7	2	41.7115	0.0005764	3.23928	0.00157122	1.68927	1	CF42	PF44	89740.2	Cold shock domain-containing protein E1 OS=Homo sapiens OX=9606 GN=CSDE1 PE=1 SV=2	435.24	377.887	429.69	414.272	2.61729	0.0763573	3	754	232.582	248.377	254.755	245.238	2.38959	0.0465455	11.4147	3	959	0.591973	-0.756398
P02452;I3L3H7;P02458;P02458-1	24	18	153.551	9.1955e-06	5.03642	0.000104222	2.04253	1	PF44	CF42	139968	Collagen alpha-1(I) chain OS=Homo sapiens OX=9606 GN=COL1A1 PE=1 SV=5	1105.72	1094.17	1047.21	1082.37	3.03437	0.028628	3	429	2237.72	2129.46	2265.11	2210.76	3.34454	0.0324474	71.7334	3	241	2.04253	1.03035
P12109;A0A087X0S5	14	2	65.0117	0.0993762	1.00272	0.0477688	1.18056	0.373647	CF42	PF44	109670	Collagen alpha-1(VI) chain OS=Homo sapiens OX=9606 GN=COL6A1 PE=1 SV=3	371.628	432.937	417.145	407.237	2.60985	0.078167	3	760	339.116	385.925	309.818	344.953	2.53776	0.111285	38.388	3	834	0.847058	-0.239468
A0A087WTA8;P08123	13	8	72.842	0.0039049	2.40839	0.00508103	2.50854	0.990805	PF44	CF42	129664	Collagen alpha-2(I) chain OS=Homo sapiens OX=9606 GN=COL1A2 PE=1 SV=1	446.148	268.334	341.721	352.068	2.54663	0.253807	3	822	972.591	870.939	805.995	883.175	2.94605	0.0950767	83.9694	3	499	2.50854	1.32685
P12110;P12110-2;P12110-3;H7C0M5	10	5	46.7243	0.0113946	1.9433	0.0105087	1.36802	0.904417	PF44	CF42	109777	Collagen alpha-2(VI) chain OS=Homo sapiens OX=9606 GN=COL6A2 PE=1 SV=4	258.292	258.871	213.172	243.445	2.3864	0.1077	3	964	332.523	351.09	315.501	333.038	2.52249	0.0534478	17.8002	3	845	1.36802	0.452091
P12111;P12111-2;E7ENL6;P12111-4;P12111-5;P12111-3;C9JNG9;I3L392	26	11	143.19	0.0151571	1.81938	0.0128505	1.24787	0.8555	PF44	CF42	345381	Collagen alpha-3(VI) chain OS=Homo sapiens OX=9606 GN=COL6A3 PE=1 SV=5	692.355	648.332	601.193	647.293	2.8111	0.0704318	3	594	824.089	847.184	751.946	807.74	2.90727	0.0615047	49.6798	3	523	1.24787	0.319471
A8TX70;A8TX70-2;E9PAL5;H0Y935	17	3	64.4128	0.159602	0.796961	0.0674582	2.30052	0.26523	CF42	PF44	291979	Collagen alpha-5(VI) chain OS=Homo sapiens OX=9606 GN=COL6A5 PE=1 SV=1	36.9001	62.8483	43.984	47.9108	1.68043	0.279945	3	1415	30.9465	4.54646	26.9852	20.826	1.31861	0.683614	14.237	3	1476	0.434684	-1.20196
A6NMZ7;A6NMZ7-2	11	1	39.3599	0.386833	0.412476	0.128866	1.09319	0.117981	PF44	CF42	248828	Collagen alpha-6(VI) chain OS=Homo sapiens OX=9606 GN=COL6A6 PE=1 SV=2	415.145	573.272	488.75	492.389	2.69231	0.160698	3	703	558.463	501.389	554.971	538.274	2.731	0.0594337	31.9916	3	676	1.09319	0.128542
Q5KU26	2	1	6.8945	0.00133555	2.87434	0.00270054	16.0277	0.999873	CF42	PF44	82085.5	Collectin-12 OS=Homo sapiens OX=9606 GN=COLEC12 PE=1 SV=3	118.217	158.494	76.1964	117.636	2.07054	0.349826	3	1218	3.9568	10.201	7.86085	7.33955	0.86567	0.429805	3.15458	3	1509	0.0623921	-4.00249
Q07021;I3L3B0;I3L3Q7	4	1	20.2427	0.824451	0.083835	0.231309	1.00959	0.0539876	CF42	PF44	31761.5	Complement component 1 Q subcomponent-binding protein_ mitochondrial OS=Homo sapiens OX=9606 GN=C1QBP PE=1 SV=1	2819.56	2658.49	2645.78	2707.94	3.43264	0.0357745	3	196	2888.33	2646.22	2512.11	2682.22	3.42849	0.0710878	190.673	3	202	0.990501	-0.0137693
P42695;G3V1A9;E9PLE0;E9PQA3	3	1	20.9077	0.125813	0.900274	0.0565076	2.00309	0.317307	PF44	CF42	171058	Condensin-2 complex subunit D3 OS=Homo sapiens OX=9606 GN=NCAPD3 PE=1 SV=2	54.1356	37.7667	13.9681	35.2901	1.54765	0.572341	3	1446	80.9427	53.4993	77.6262	70.6894	1.84935	0.2119	14.9791	3	1329	2.00309	1.00223
P78357	3	1	8.8269	0.00322014	2.49213	0.00459237	1.48967	0.994929	CF42	PF44	158320	Contactin-associated protein 1 OS=Homo sapiens OX=9606 GN=CNTNAP1 PE=1 SV=1	668.567	583.006	601.403	617.659	2.79075	0.0729163	3	610	454.782	390.506	398.6	414.629	2.61766	0.0844312	35.0077	3	766	0.671292	-0.574988
Q99627;E9PGT6	2	1	8.4025	6.07245e-07	6.21664	1.74358e-05	34.9567	1	PF44	CF42	23282.7	COP9 signalosome complex subunit 8 OS=Homo sapiens OX=9606 GN=COPS8 PE=1 SV=1	29.489	34.7671	33.15	32.4687	1.51146	0.0832872	3	1454	1136.48	1213.47	1055.04	1135	3.055	0.0698011	79.2242	3	407	34.9567	5.1275
O75131;A0A087WYQ3;H0YB26;A0A087WXR6;E5RHZ0;A0A087WUS8;E5RFT7	6	2	36.7608	0.000232202	3.63413	0.000840405	5.16534	1	CF42	PF44	60986.1	Copine-3 OS=Homo sapiens OX=9606 GN=CPNE3 PE=1 SV=1	435.334	404.3	381.357	406.997	2.60959	0.0665591	3	761	68.0797	99.7869	68.5152	78.7939	1.89649	0.230751	18.1818	3	1301	0.193598	-2.36886
O75367;O75367-2;O75367-3;B4DJC3	3	3	17.8365	0.0295292	1.52975	0.0202517	1.11108	0.70105	CF42	PF44	39788.2	Core histone macro-H2A.1 OS=Homo sapiens OX=9606 GN=H2AFY PE=1 SV=4	611.547	587.425	549.636	582.869	2.76557	0.0535381	3	638	519.629	526.223	527.942	524.598	2.71983	0.00836442	4.38796	3	694	0.900027	-0.15196
Q9ULV4;Q9ULV4-2;Q9ULV4-3;B4E3S0;H0YHL7;F8VRE9;F8VSA4;F8VTT6;F8VUX3;F8VVB7;F8W1H8;F8VV53	12	8	100.189	0.519367	0.284525	0.161859	1.02467	0.0857233	PF44	CF42	53933.5	Coronin-1C OS=Homo sapiens OX=9606 GN=CORO1C PE=1 SV=1	1515.21	1544.34	1418.18	1492.58	3.17394	0.0442574	3	330	1502.26	1600.41	1485.52	1529.4	3.18452	0.0405826	62.0669	3	325	1.02467	0.0351593
E9PRI1;H0YE94;Q96NY9	2	1	8.597	0.0313445	1.50384	0.0212263	2.44604	0.685245	PF44	CF42	52745.7	Crossover junction endonuclease MUS81 OS=Homo sapiens OX=9606 GN=MUS81 PE=1 SV=1	32.4802	74.8857	73.5178	60.2946	1.78028	0.399665	3	1370	125.617	176.327	140.504	147.483	2.16874	0.176736	26.0655	3	1131	2.44604	1.29045
P17812;P17812-2	6	2	31.8127	0.0342783	1.46498	0.0224253	1.37219	0.661172	PF44	CF42	67374.8	CTP synthase 1 OS=Homo sapiens OX=9606 GN=CTPS1 PE=1 SV=2	450.813	349.292	389.146	396.417	2.59815	0.12903	3	768	472.833	573.087	585.958	543.959	2.73557	0.113855	61.9326	3	670	1.37219	0.45648
Q9UBG0	5	2	21.2752	0.0277784	1.55629	0.0193279	1.40633	0.716999	CF42	PF44	169868	C-type mannose receptor 2 OS=Homo sapiens OX=9606 GN=MRC2 PE=1 SV=2	260.504	363.289	311.261	311.685	2.49372	0.16489	3	874	229.616	221.529	213.747	221.63	2.34563	0.035801	7.93459	3	1004	0.711073	-0.491931
Q7Z408;A0A087X0K4;Q7Z408-4	5	1	21.9256	0.0367569	1.43466	0.0234186	1.32043	0.642136	CF42	PF44	387738	CUB and sushi domain-containing protein 2 OS=Homo sapiens OX=9606 GN=CSMD2 PE=1 SV=2	4412.79	3302.23	4038.12	3917.71	3.59303	0.144213	3	139	3057.23	2981.44	2862.33	2967	3.47232	0.0331146	98.251	3	183	0.757329	-0.401008
A0A0J9YX66;O95319;A0A0J9YXJ0;A0A0J9YXK1;A0A1B0GU44;A0A1B0GUN8;E9PC62;O95319-2;O95319-3;O95319-4;O95319-5;Q5VZZ6;V9GYD9	2	1	8.9555	0.390971	0.407856	0.12983	1.57234	0.116668	PF44	CF42	55370.9	CUGBP Elav-like family member 2 OS=Homo sapiens OX=9606 GN=CELF2 PE=1 SV=1	10.7808	94.232	98.0218	67.6782	1.83045	0.72861	3	1345	55.743	118.624	144.872	106.413	2.02699	0.430417	45.802	3	1235	1.57234	0.65291
Q86VP6;Q86VP6-2;A0A0C4DGH5;H0YH27;Q86VP6-3	12	6	65.5611	0.632975	0.198613	0.189582	1.26331	0.0690335	CF42	PF44	138087	Cullin-associated NEDD8-dissociated protein 1 OS=Homo sapiens OX=9606 GN=CAND1 PE=1 SV=2	1803.91	1635.75	415.739	1285.13	3.10895	0.589509	3	377	2198.22	418.087	435.525	1017.28	3.00744	1.00539	1022.76	3	448	0.791574	-0.337204
A0A1W2PS52;P04080	1	1	7.0027	0.000291736	3.53501	0.000997215	5.17247	1	PF44	CF42	9132.39	Cystatin-B OS=Homo sapiens OX=9606 GN=CSTB PE=1 SV=1	123.37	88.6317	96.2326	102.745	2.01176	0.177739	3	1253	511.18	630.716	452.436	531.444	2.72546	0.170951	90.851	3	684	5.17247	2.37085
P21291;E9PS42;E9PND2;E9PP21	9	5	70.9259	5.22873e-05	4.2816	0.000351873	2.80138	1	PF44	CF42	21422.8	Cysteine and glycine-rich protein 1 OS=Homo sapiens OX=9606 GN=CSRP1 PE=1 SV=3	188.266	178.544	212.825	193.212	2.28603	0.0914408	3	1048	520.463	561.108	542.206	541.259	2.73341	0.0375767	20.3387	3	672	2.80138	1.48614
P13569;E7EPB6;P13569-2;P13569-3	8	1	29.6772	0.169437	0.770991	0.070713	1.27322	0.252942	PF44	CF42	169168	Cystic fibrosis transmembrane conductance regulator OS=Homo sapiens OX=9606 GN=CFTR PE=1 SV=3	2217.79	1883.84	3220.87	2440.83	3.38754	0.285093	3	220	3166.06	3007.31	3149.78	3107.72	3.49244	0.0281025	87.3346	3	177	1.27322	0.348482
P31930;F8WEF1;F8WER5	5	2	25.2275	0.00841754	2.07482	0.00863459	1.22916	0.943308	PF44	CF42	53330.2	Cytochrome b-c1 complex subunit 1_ mitochondrial OS=Homo sapiens OX=9606 GN=UQCRC1 PE=1 SV=3	281.719	261.426	262.365	268.503	2.42895	0.0426616	3	931	325.866	351.878	312.356	330.033	2.51856	0.0608662	20.0879	3	849	1.22916	0.297673
P22695;H3BRG4;H3BSJ9;H3BP04	5	1	26.5334	0.558836	0.252715	0.171065	1.03111	0.0790561	CF42	PF44	48614.2	Cytochrome b-c1 complex subunit 2_ mitochondrial OS=Homo sapiens OX=9606 GN=UQCRC2 PE=1 SV=3	2778.04	3004.85	2977.81	2920.23	3.46542	0.0424218	3	183	2882.52	2601.01	3012.82	2832.12	3.45211	0.0743202	210.483	3	191	0.969825	-0.0442038
C9JFR7;P99999	4	3	26.7444	0.00110082	2.95828	0.00232411	1.21275	0.999957	PF44	CF42	11447.4	Cytochrome c (Fragment) OS=Homo sapiens OX=9606 GN=CYCS PE=1 SV=1	515.114	547.093	534.099	532.102	2.72599	0.0302248	3	673	626.316	656.406	653.198	645.307	2.80977	0.0256067	16.5242	3	600	1.21275	0.278283
H3BNX8;P20674;H3BRM5;H3BV69	3	2	17.8025	0.000306128	3.5141	0.00103006	1.53487	1	PF44	CF42	17463	Cytochrome c oxidase subunit 5A_ mitochondrial OS=Homo sapiens OX=9606 GN=COX5A PE=1 SV=1	402.75	390.261	439.05	410.687	2.61351	0.0617126	3	757	641.003	618.234	631.813	630.35	2.79958	0.0181721	11.4548	3	615	1.53487	0.618114
Q14204;A0A2R8Y706;A0A2R8Y5T0;A0A2R8Y542;A0A2R8Y6H2;A0A2R8YFZ7;A0A2R8Y6I5;A0A2R8YGC7;H0YJ21	69	29	417.207	0.913262	0.0394045	0.250258	1.00496	0.0509556	PF44	CF42	535146	Cytoplasmic dynein 1 heavy chain 1 OS=Homo sapiens OX=9606 GN=DYNC1H1 PE=1 SV=5	775.826	751.875	818.248	781.983	2.8932	0.0429833	3	530	808.49	811.24	737.846	785.859	2.89534	0.0529394	41.6029	3	532	1.00496	0.00713323
Q13409;Q13409-2;Q13409-3;Q13409-5;Q13409-6;Q13409-7;E7EMU4;E7EQL5;E7EQU2;E7ERH4;E7ERR6;E7ESD3;E7ET01;E7ETL8;E7EUM4;E7EV09;E9PGG1;E7EU01	4	2	19.4351	0.172386	0.763499	0.0716898	1.20521	0.249459	CF42	PF44	71855.9	Cytoplasmic dynein 1 intermediate chain 2 OS=Homo sapiens OX=9606 GN=DYNC1I2 PE=1 SV=3	624.845	508.983	478.478	537.435	2.73033	0.143683	3	670	423.733	398.19	515.856	445.926	2.64926	0.138797	61.8931	3	747	0.82973	-0.269287
O43237;O43237-2;J3KRI4;J3KRZ2;B4E2E0	5	1	27.4806	0.925723	0.0335187	0.252749	1.03127	0.0506996	PF44	CF42	54384.5	Cytoplasmic dynein 1 light intermediate chain 2 OS=Homo sapiens OX=9606 GN=DYNC1LI2 PE=1 SV=1	65.2222	82.3259	67.8192	71.7891	1.85606	0.128391	3	1336	45.8122	67.8624	108.428	74.0342	1.86943	0.429004	31.761	3	1316	1.03127	0.0444277
Q8NCM8;Q8NCM8-2;Q8NCM8-3;H0YDE0	27	3	116.224	0.453418	0.343501	0.145109	13.4193	0.0995285	PF44	CF42	496101	Cytoplasmic dynein 2 heavy chain 1 OS=Homo sapiens OX=9606 GN=DYNC2H1 PE=1 SV=4	65.0188	57.7938	20.0291	47.6139	1.67773	0.50743	3	1417	48.3132	26.184	1842.34	638.945	2.80546	1.63117	1042.23	3	607	13.4193	3.74624
Q7L576;Q7L576-2;Q7L576-3	3	2	12.3823	0.00284378	2.5461	0.0042676	3.29791	0.996665	PF44	CF42	146837	Cytoplasmic FMR1-interacting protein 1 OS=Homo sapiens OX=9606 GN=CYFIP1 PE=1 SV=1	63.9746	39.2547	68.8816	57.3703	1.75869	0.276786	3	1385	167.263	204.645	195.698	189.202	2.27693	0.103168	19.5196	3	1061	3.29791	1.72155
Q07065	30	19	243.093	0.000425658	3.37094	0.00129105	1.45232	1	CF42	PF44	66136.6	Cytoskeleton-associated protein 4 OS=Homo sapiens OX=9606 GN=CKAP4 PE=1 SV=2	8229	7857.06	7803.12	7963.06	3.90108	0.0291202	3	61	5483.2	5772.6	5193.22	5483.01	3.73902	0.0528348	289.693	3	97	0.688555	-0.538355
P28838;P28838-2;H0Y9Q1	11	5	68.0355	0.644365	0.190868	0.191879	1.02316	0.0677405	CF42	PF44	56565.6	Cytosol aminopeptidase OS=Homo sapiens OX=9606 GN=LAP3 PE=1 SV=3	665.135	658.763	726.484	683.461	2.83471	0.0547152	3	564	714.62	646.186	643.162	667.989	2.82477	0.060497	40.4114	3	589	0.977363	-0.0330329
O75891;O75891-3;O75891-2	2	1	12.6785	0.764195	0.116796	0.217246	1.05597	0.0573418	CF42	PF44	99684.8	Cytosolic 10-formyltetrahydrofolate dehydrogenase OS=Homo sapiens OX=9606 GN=ALDH1L1 PE=1 SV=2	165.973	252.117	207.229	208.44	2.31898	0.206701	3	1020	177.055	230.374	184.745	197.391	2.29533	0.146011	28.8213	3	1050	0.946995	-0.0785717
A0A286YF22;A0A2C9F2M7;O43175;A0A286YER3;A0A286YFA2;A0A286YFB2;A0A286YFC8;A0A286YFL2;A0A286YFM8;A0A286YF34;A0A286YFF3;A0A286YFK5	4	4	23.8235	0.000134596	3.87097	0.000568331	2.2514	1	CF42	PF44	56680.1	D-3-phosphoglycerate dehydrogenase OS=Homo sapiens OX=9606 GN=PHGDH PE=1 SV=1	422.146	375.603	364.98	387.577	2.58836	0.0784512	3	780	177.148	178.749	160.55	172.149	2.23591	0.0585351	10.0768	3	1087	0.444168	-1.17082
C8C3P2;E9PDV3;J3KQY6;Q92782;Q92782-2;C9IZH8;C9JGC1;K7EJD5;Q92782-3	2	1	8.6741	0.119832	0.921429	0.0544654	3.39978	0.328575	CF42	PF44	46523	D4 zinc and double PHD fingers family 1 variant 4 OS=Homo sapiens OX=9606 GN=DPF1 PE=1 SV=1	22.5913	58.5197	62.6021	47.9044	1.68038	0.459594	3	1416			42.2713	42.2713	1.62605	#DIV/0!	#DIV/0!	1	1413	0.882409	-0.18048
A0A096LNH6;Q14185	7	1	24.4311	0.496795	0.303823	0.156725	1.11255	0.0900366	PF44	CF42	218723	Dedicator of cytokinesis protein 1 OS=Homo sapiens OX=9606 GN=DOCK1 PE=1 SV=1	277.229	164.868	246.559	229.552	2.36088	0.25301	3	987	237.924	287.996	240.242	255.387	2.4072	0.110669	28.2635	3	948	1.11255	0.153864
Q92608;E7ERW7;E5RFJ0;F6S220;H0YB76;Q92608-2	7	4	30.2466	0.0339986	1.46854	0.0223217	2.19345	0.663393	CF42	PF44	213260	Dedicator of cytokinesis protein 2 OS=Homo sapiens OX=9606 GN=DOCK2 PE=1 SV=2	505.005	250.011	264.281	339.766	2.53118	0.421701	3	841	143.164	171.428	150.108	154.9	2.19005	0.0950847	14.7287	3	1115	0.455904	-1.1332
Q9H7D0;H0Y7N4;H0YB14;Q9H7D0-2	10	3	42.0179	0.389589	0.409394	0.12955	11.5301	0.117104	PF44	CF42	216336	Dedicator of cytokinesis protein 5 OS=Homo sapiens OX=9606 GN=DOCK5 PE=1 SV=3	99.2522	87.8813	139.78	108.971	2.03731	0.250342	3	1235	3559.06	122.915	87.3541	1256.44	3.09914	1.58718	1994.21	3	381	11.5301	3.52733
Q96HP0;K7ESB7	6	1	20.4671	0.0303314	1.51811	0.0206581	1.07637	0.693977	PF44	CF42	231440	Dedicator of cytokinesis protein 6 OS=Homo sapiens OX=9606 GN=DOCK6 PE=1 SV=3	1242.94	1260.47	1172.87	1225.43	3.08829	0.0378253	3	389	1316.41	1309.9	1330.75	1319.02	3.12025	0.00808733	10.6673	3	368	1.07637	0.106177
Q9Y394;Q9Y394-2	1	1	4.9872	0.0512531	1.29028	0.0298303	1.50444	0.549996	CF42	PF44	38698	Dehydrogenase/reductase SDR family member 7 OS=Homo sapiens OX=9606 GN=DHRS7 PE=1 SV=1	114.324	177.886	165.205	152.472	2.18319	0.22063	3	1137	107.789	102.324	93.9308	101.348	2.00581	0.0688759	6.98042	3	1247	0.6647	-0.589225
P54886;P54886-2	6	2	37.8705	0.0431726	1.36479	0.0264498	1.68466	0.597708	CF42	PF44	88043.8	Delta-1-pyrroline-5-carboxylate synthase OS=Homo sapiens OX=9606 GN=ALDH18A1 PE=1 SV=2	253.157	372.118	252.272	292.516	2.46615	0.235676	3	907	200.485	185.754	134.665	173.635	2.23964	0.198941	34.543	3	1083	0.593591	-0.752459
Q68D51;Q68D51-2;Q68D51-3	2	1	7.9244	0.0196018	1.7077	0.0152942	1.23779	0.801775	PF44	CF42	108177	DENN domain-containing protein 2C OS=Homo sapiens OX=9606 GN=DENND2C PE=1 SV=2	180.469	212.385	198.651	197.168	2.29484	0.0811981	3	1038	259.536	238.457	234.168	244.054	2.38749	0.0556386	13.5788	3	961	1.23779	0.307772
Q9Y3Z3;A0A2R8YCS7;Q9Y3Z3-4;A0A2R8YD90;Q9Y3Z3-3;A0A2R8Y5D2;A0A2R8YF51	6	1	35.9525	0.000119279	3.92344	0.000550878	3.11695	1	PF44	CF42	72942	Deoxynucleoside triphosphate triphosphohydrolase SAMHD1 OS=Homo sapiens OX=9606 GN=SAMHD1 PE=1 SV=2	85.3256	70.6673	71.8305	75.9411	1.88048	0.107293	3	1331	224.225	226.374	259.516	236.705	2.37421	0.0835819	19.7843	3	980	3.11695	1.64014
Accession	Peptide count	Unique peptides	Confidence score	Anova (p)	-LOG10.Anova(p)	q Value	Max fold change	Power	Highest mean condition	Lowest mean condition	Mass	Description	20190314_UDMSE_CF42_001	20190314_UDMSE_CF42_002	20190314_UDMSE_CF42_003	average.intensity.control-CF42	log10(Average.intensity. control-CF42)	CV (Inten.Control-CF42)	count.control-CF42	IDs_control-CF42	20190314_UDMSE_PF44_001	20190314_UDMSE_PF44_002	20190314_UDMSE_PF44_003	average.intensity.carrier-PF44	log10(Average.intensity. carrier-PF44)	CV (Inten.carrier-PF44)		count_carrier-PF44	IDs_carrier-PF44	ratio.PF44/CF42 (Carrier/control)	LOG2 ratio.PF44/CF42 (Carrier/control)
Q14574;Q14574-2	2	1	7.7252	0.272139	0.565209	0.0994139	2.72555	0.167497	CF42	PF44	101281	Desmocollin-3 OS=Homo sapiens OX=9606 GN=DSC3 PE=1 SV=3	60.9854	69.7719	205.886	112.214	2.05005	0.723979	3	1228	84.1984	39.3154		61.7569	1.79069	0.513903	31.7371	2	1354	0.550347	-0.861586
Q14126	1	1	4.8179	0.846954	0.0721402	0.23595	1.17575	0.0530129	CF42	PF44	123092	Desmoglein-2 OS=Homo sapiens OX=9606 GN=DSG2 PE=1 SV=2	31.122	98.3272	39.668	56.3724	1.75107	0.648976	3	1390	42.6789	31.5312	69.6279	47.946	1.68075	0.40852	19.5869	3	1397	0.850523	-0.233578
P15924;P15924-3;P15924-2	16	3	54.662	0.00220686	2.65623	0.00375685	5.04032	0.998709	PF44	CF42	334227	Desmoplakin OS=Homo sapiens OX=9606 GN=DSP PE=1 SV=3	642.164	514.963	295.08	484.069	2.68491	0.362742	3	711	2685.31	2427.68	2206.59	2439.86	3.38736	0.0981988	239.591	3	225	5.04032	2.33351
P60981;F6RFD5;P60981-2	7	4	37.3449	8.56529e-05	4.06726	0.00048596	1.38423	1	PF44	CF42	18962	Destrin OS=Homo sapiens OX=9606 GN=DSTN PE=1 SV=3	819.576	788.784	789.991	799.451	2.90279	0.0218149	3	518	1072.16	1121.72	1125.99	1106.62	3.044	0.0270416	29.9249	3	419	1.38423	0.469084
E9PD68;Q14194;Q14194-2	6	1	36.918	0.00258945	2.58679	0.0040408	13.8745	0.997615	CF42	PF44	62371.9	Dihydropyrimidinase-related protein 1 OS=Homo sapiens OX=9606 GN=CRMP1 PE=1 SV=1	224.797	296.502	351.779	291.026	2.46393	0.21877	3	910	10.3689	14.206	38.3517	20.9755	1.32171	0.723222	15.17	3	1474	0.0720744	-3.79437
Q16555;A0A1C7CYX9;Q16555-2;E5RFU4	10	5	68.2819	0.00235607	2.62781	0.00394843	1.1399	0.99833	PF44	CF42	62749.9	Dihydropyrimidinase-related protein 2 OS=Homo sapiens OX=9606 GN=DPYSL2 PE=1 SV=1	98264.6	94102.7	93711.7	95359.6	4.97936	0.0264613	3	4	110405	109439	106257	108700	5.03623	0.0199677	2170.49	3	4	1.1399	0.188906
B7Z264;B7Z2T4;E9PIW2;E9PN83;Q15700;Q15700-2;Q15700-3;Q15700-4;B5MCC5;Q15700-5;A8MVA8;C9JFF9;E9PPV7;E9PQT9;E9PRL2;F8W750;H7C325	5	1	24.2132	0.213816	0.66996	0.0836175	1.14734	0.20832	PF44	CF42	88238.7	Disks large homolog 2 OS=Homo sapiens OX=9606 GN=DLG2 PE=1 SV=1	258.062	242.065	217.035	239.054	2.3785	0.0865014	3	972	302.31	235.327	285.192	274.276	2.43819	0.12688	34.8002	3	923	1.14734	0.198296
Q16531;F5GY55;F5GWI0;F5H2L3	10	3	37.3316	0.00232038	2.63444	0.0039038	1.96874	0.998426	PF44	CF42	128223	DNA damage-binding protein 1 OS=Homo sapiens OX=9606 GN=DDB1 PE=1 SV=1	116.766	110.426	143.757	123.65	2.09219	0.143145	3	1203	254.877	259.059	216.365	243.434	2.38638	0.0966788	23.5349	3	963	1.96874	0.97727
P52701;P52701-3;P52701-4;A0A087WWJ1;A0A087WYT6;P52701-2	9	3	31.8988	0.853213	0.0689425	0.237123	1.05471	0.0527673	CF42	PF44	154611	DNA mismatch repair protein Msh6 OS=Homo sapiens OX=9606 GN=MSH6 PE=1 SV=2	100.813	79.7378	58.9312	79.8273	1.90215	0.26233	3	1323	68.6614	75.5298	82.8677	75.6863	1.87902	0.0938666	7.10442	3	1307	0.948125	-0.0768508
O75417;A0A087WXL3;O75417-2	12	2	46.1984	0.0842097	1.07464	0.0426189	5.48582	0.415654	PF44	CF42	292471	DNA polymerase theta OS=Homo sapiens OX=9606 GN=POLQ PE=1 SV=2	7.37393	46.6844	25.3716	26.4766	1.42286	0.74324	3	1472	40.6294	215.191	179.917	145.246	2.1621	0.635483	92.3014	3	1138	5.48582	2.45571
G3V3M6;G3V5Q1;P27695	3	1	17.1086	0.0125335	1.90193	0.0112461	1.49678	0.889401	CF42	PF44	29475.2	DNA-(apurinic or apyrimidinic site) lyase (Fragment) OS=Homo sapiens OX=9606 GN=APEX1 PE=1 SV=1	369.949	317.82	341.607	343.125	2.53545	0.076059	3	837	268.834	205.391	213.502	229.242	2.36029	0.150613	34.5268	3	990	0.668101	-0.581861
P78527;P78527-2;H0YG84	39	9	184.869	0.176602	0.753004	0.072847	1.80778	0.244625	CF42	PF44	474051	DNA-dependent protein kinase catalytic subunit OS=Homo sapiens OX=9606 GN=PRKDC PE=1 SV=3	1215.62	1501.29	1496.82	1404.58	3.14755	0.116517	3	353	1694.2	339.722	296.963	776.963	2.8904	1.02275	794.642	3	541	0.553165	-0.854217
O95602	3	1	10.3012	0.0455559	1.34146	0.0272132	1.24843	0.582771	CF42	PF44	196808	DNA-directed RNA polymerase I subunit RPA1 OS=Homo sapiens OX=9606 GN=POLR1A PE=1 SV=2	164.908	140.699	130.172	145.26	2.16214	0.12262	3	1155	122.237	110.03	116.794	116.354	2.06578	0.0525594	6.11548	3	1211	0.801005	-0.320116
A0A2R8Y5D3;A0A2R8YEY5;A0A2R8YEZ4;O15160;O15160-2	2	1	8.802	0.0898417	1.04652	0.0447851	1.19899	0.399014	CF42	PF44	39117.4	DNA-directed RNA polymerases I and III subunit RPAC1 OS=Homo sapiens OX=9606 GN=POLR1C PE=1 SV=1	443.033	374.135	343.196	386.788	2.58747	0.132132	3	782	315.428	313.164	339.193	322.595	2.50866	0.0446961	14.4187	3	859	0.834035	-0.261819
P31689;P31689-2	2	2	12.9692	0.674508	0.171013	0.198269	1.03805	0.0645963	PF44	CF42	45609.6	DnaJ homolog subfamily A member 1 OS=Homo sapiens OX=9606 GN=DNAJA1 PE=1 SV=2	381.038	339.57	399.084	373.231	2.57198	0.08176	3	794	437.078	365.94	359.282	387.433	2.5882	0.111303	43.1226	3	790	1.03805	0.0538808
Q8IXB1	2	1	8.3474	0.0116806	1.93253	0.0106543	1.42673	0.900637	PF44	CF42	92391.4	DnaJ homolog subfamily C member 10 OS=Homo sapiens OX=9606 GN=DNAJC10 PE=1 SV=2	4284.75	3472.7	3495.91	3751.12	3.57416	0.123238	3	150	5820.13	5065.75	5169.62	5351.83	3.7285	0.0763976	408.867	3	99	1.42673	0.512713
Q9P2X0;Q9P2X0-2	1	1	6.3716	0.455651	0.341367	0.145692	1.09734	0.0989969	PF44	CF42	10264.8	Dolichol-phosphate mannosyltransferase subunit 3 OS=Homo sapiens OX=9606 GN=DPM3 PE=1 SV=2	119.653	184.06	148.985	150.899	2.17869	0.21369	3	1141	155.383	176.347	165.034	165.588	2.21903	0.0633691	10.4932	3	1096	1.09734	0.134011
A0A0C4DGS1;P39656;P39656-3;U3KQ84;P39656-2	7	4	49.2937	0.329658	0.481936	0.115527	1.07549	0.139027	CF42	PF44	48913.6	Dolichyl-diphosphooligosaccharide--protein glycosyltransferase 48 kDa subunit OS=Homo sapiens OX=9606 GN=DDOST PE=1 SV=1	372.926	325.76	339.68	346.122	2.53923	0.0700145	3	831	289.509	346.271	329.706	321.829	2.50762	0.0906988	29.1895	3	862	0.929813	-0.104987
P04843;B7Z4L4;F8WF32	12	7	75.3346	0.00754553	2.12231	0.00806407	1.15833	0.954167	PF44	CF42	68683.6	Dolichyl-diphosphooligosaccharide--protein glycosyltransferase subunit 1 OS=Homo sapiens OX=9606 GN=RPN1 PE=1 SV=1	3953.56	3806.74	3791.92	3850.74	3.58554	0.0232043	3	142	4678.89	4425.15	4277.23	4460.43	3.64938	0.0455429	203.141	3	121	1.15833	0.212046
P04844;P04844-2;Q5JYR4;Q5JYR7;F2Z3K5;H0Y5M1	6	5	39.1248	0.000133825	3.87346	0.000568331	2.92569	1	CF42	PF44	69398.1	Dolichyl-diphosphooligosaccharide--protein glycosyltransferase subunit 2 OS=Homo sapiens OX=9606 GN=RPN2 PE=1 SV=3	835.773	1033.46	915.45	928.228	2.96765	0.107152	3	464	334.509	325.372	291.923	317.268	2.50143	0.0706649	22.4197	3	870	0.341799	-1.54878
F5GXX5;P61803;A0A0B4J239;F5H895	2	2	14.5121	0.000106293	3.9735	0.000544997	1.19052	1	CF42	PF44	9611.28	Dolichyl-diphosphooligosaccharide--protein glycosyltransferase subunit DAD1 OS=Homo sapiens OX=9606 GN=DAD1 PE=1 SV=1	1321.23	1350.8	1360.04	1344.02	3.12841	0.0150855	3	362	1121.13	1145.49	1120.19	1128.93	3.05267	0.0127045	14.3425	3	409	0.839966	-0.251598
P46977;P46977-2;A0A0C4DH80;E9PI32;E9PN73	4	1	19.9567	0.109647	0.960004	0.0516677	3.05466	0.349623	CF42	PF44	81157.1	Dolichyl-diphosphooligosaccharide--protein glycosyltransferase subunit STT3A OS=Homo sapiens OX=9606 GN=STT3A PE=1 SV=2	219.373	192.004	277.896	229.758	2.36127	0.190972	3	986	132.797	80.4034	12.4463	75.2155	1.87631	0.802265	60.3428	3	1309	0.327369	-1.61101
P55265;P55265-4;H0YCK3;P55265-2;P55265-3;P55265-5	7	1	28.3035	0.103935	0.983237	0.0495413	3.65261	0.3626	PF44	CF42	137264	Double-stranded RNA-specific adenosine deaminase OS=Homo sapiens OX=9606 GN=ADAR PE=1 SV=4	53.7551			53.7551	1.73042	#DIV/0!	1	1395	76.0024	74.6348	45.7094	65.4489	1.8159	0.261404	17.1086	3	1346	1.21754	0.283966
O60469	3	1	10.6276	0.0953079	1.02087	0.0465404	1.24144	0.384074	CF42	PF44	224028	Down syndrome cell adhesion molecule OS=Homo sapiens OX=9606 GN=DSCAM PE=1 SV=2	381.404	429.233	366.392	392.343	2.59367	0.0836453	3	772	350.988	334.855	262.273	316.039	2.49974	0.149527	47.2563	3	873	0.805516	-0.312016
Q16643;Q16643-2;Q16643-3;D6R9Q9;D6R9W4	5	2	23.2096	0.0220138	1.65731	0.0162628	1.49215	0.774898	CF42	PF44	71885.6	Drebrin OS=Homo sapiens OX=9606 GN=DBN1 PE=1 SV=4	437.098	527.332	473.095	479.175	2.68049	0.0947951	3	719	330.086	264.536	368.769	321.13	2.50668	0.164078	52.6904	3	865	0.670173	-0.577395
O43781;O43781-2;Q5SY34	3	1	12.5882	0.0165329	1.78165	0.013486	1.48714	0.838313	PF44	CF42	66512.2	Dual specificity tyrosine-phosphorylation-regulated kinase 3 OS=Homo sapiens OX=9606 GN=DYRK3 PE=1 SV=3	270.198	263.762	207.427	247.129	2.39292	0.139738	3	959	407.043	337.457	358.044	367.515	2.56527	0.0972656	35.7465	3	806	1.48714	0.572537
A0A087WVK0	2	1	11.4241	0.00071376	3.14645	0.00183373	1.19781	0.999997	PF44	CF42	54479.1	Dual-specificity protein kinase CLK1 OS=Homo sapiens OX=9606 GN=CLK1 PE=1 SV=1	34507	32942.6	34325.5	33925	4.53052	0.025222	3	12	41617.3	39929.2	40361.2	40635.9	4.60891	0.0215802	876.93	3	12	1.19781	0.260404
E7EX90;Q14203;Q14203-3;Q14203-4;Q14203-6;Q14203-2;Q14203-5;Q6AWB1;C9J1B7;C9JJD0;C9JJN7;C9JKG6;C9JTE5;C9JZA4;E9PCY0	7	1	31.5241	0.0409899	1.38732	0.0253651	10.805	0.612097	CF42	PF44	139836	Dynactin subunit 1 OS=Homo sapiens OX=9606 GN=DCTN1 PE=1 SV=1	53.5812	22.3096	14.9983	30.2963	1.48139	0.67645	3	1465			8.41176	8.41176	0.924887	#DIV/0!	#DIV/0!	1	1507	0.277649	-1.84866
Q13561;Q13561-2;Q13561-3;F8W1I6;H0YHL1;H0YI98;F8VRV7;F8VW18;F8VX93	6	4	36.8047	0.00275469	2.55993	0.00422217	1.26462	0.997018	CF42	PF44	44345.1	Dynactin subunit 2 OS=Homo sapiens OX=9606 GN=DCTN2 PE=1 SV=4	397.231	417.651	374.68	396.521	2.59827	0.0542072	3	767	308.915	307.645	324.091	313.551	2.49631	0.0291841	9.15069	3	875	0.790754	-0.338699
O00429;G8JLD5;O00429-2;O00429-3;O00429-4;O00429-5;O00429-6;O00429-8;O00429-7;F8VUJ9;F8W1W3;B4DDQ3;B4DPZ9;F8VR28;F8VYL3;F8VZ52	12	2	59.1462	0.00129015	2.88936	0.00264601	94.5384	0.999894	PF44	CF42	82390.5	Dynamin-1-like protein OS=Homo sapiens OX=9606 GN=DNM1L PE=1 SV=2		2.51229	3.04699	2.77964	0.443989	0.136019	2	1520	174.703	174.524	176.339	175.189	2.24351	0.00570914	1.00018	3	1079	63.0256	5.97787
Q9P2D7;Q9P2D7-8;Q9P2D7-6;H7C563;H7C506;Q9P2D7-3	14	1	52.7974	0.331951	0.478926	0.116235	1.14243	0.138064	CF42	PF44	491471	Dynein heavy chain 1_ axonemal OS=Homo sapiens OX=9606 GN=DNAH1 PE=1 SV=5	538.351	643.545	499.923	560.606	2.74866	0.132629	3	652	470.17	416.519	585.459	490.716	2.69083	0.175914	86.3238	3	717	0.875331	-0.1921
Q8IVF4;A0A0J9YY17;F5H515;A0A087WV07;Q8IVF4-2;H0YGZ2	42	4	149.939	0.0105389	1.97721	0.01002	1.21367	0.915721	PF44	CF42	518035	Dynein heavy chain 10_ axonemal OS=Homo sapiens OX=9606 GN=DNAH10 PE=1 SV=4	2102.96	1974.78	2097.16	2058.3	3.31351	0.03517	3	255	2315.98	2597.61	2580.67	2498.09	3.39761	0.0632233	157.937	3	219	1.21367	0.279372
Q96DT5;A0A087WYC6;A0A0C4DFR0	4	2	13.4282	0.00417859	2.37897	0.00537223	1.16222	0.988834	PF44	CF42	524533	Dynein heavy chain 11_ axonemal OS=Homo sapiens OX=9606 GN=DNAH11 PE=1 SV=4	159794	153764	151415	154991	5.19031	0.0278874	3	3	187340	177081	175980	180134	5.2556	0.0347794	6264.94	3	3	1.16222	0.216887
Q9UFH2;K7EK91;K7ELN3;A0A0G2JPM1;A0A0M3HER1;A8MVZ6;F8VZX7;F8W056;F8WBX4;F8WD48;H0Y592;H0Y6R4;H0YKM1;H3BSI0;O60320;P48059;P48059-2;P48059-4;P48059-5;Q13905;Q13905-2;Q13905-3;Q13905-4;Q7Z4I7;Q7Z4I7-2;Q7Z4I7-3;Q7Z4I7-4;Q7Z4I7-5;Q96G01;Q96G01-2;Q96G01-3;Q96G01-4;Q9H0M0;Q9H0M0-3;Q9H0M0-6	24	2	104.495	0.0959149	1.01811	0.046678	1.11642	0.382482	CF42	PF44	513078	Dynein heavy chain 17_ axonemal OS=Homo sapiens OX=9606 GN=DNAH17 PE=1 SV=3	3879.91	3873.06	3555.53	3769.5	3.57628	0.0491667	3	148	3541.97	3489.08	3098.25	3376.43	3.52846	0.0717806	242.362	3	159	0.895724	-0.158874
Q9P225;Q9P225-2;I3L520;Q9P225-3	22	2	85.2848	0.0748448	1.12584	0.039168	1.07697	0.4466	CF42	PF44	511121	Dynein heavy chain 2_ axonemal OS=Homo sapiens OX=9606 GN=DNAH2 PE=2 SV=3	2368.44	2546.15	2596.16	2503.58	3.39856	0.0478042	3	216	2266.31	2345.52	2362.13	2324.65	3.36636	0.0220268	51.2047	3	236	0.928531	-0.106979
Q8TD57;Q8TD57-3	23	2	78.5069	0.0675441	1.17041	0.0363636	2.11336	0.474126	PF44	CF42	474080	Dynein heavy chain 3_ axonemal OS=Homo sapiens OX=9606 GN=DNAH3 PE=2 SV=1	78.5195	24.0162	47.8052	50.1137	1.69996	0.545258	3	1409	106.633	99.7764	111.316	105.908	2.02493	0.0547982	5.80359	3	1236	2.11336	1.07954
Q8TE73	37	6	144.052	0.506868	0.295105	0.158999	1.03202	0.0880633	CF42	PF44	532843	Dynein heavy chain 5_ axonemal OS=Homo sapiens OX=9606 GN=DNAH5 PE=1 SV=3	4121.84	4227.8	3820.66	4056.77	3.60818	0.0520669	3	131	3696.48	4089.3	4006.95	3930.91	3.59449	0.0527001	207.16	3	136	0.968976	-0.0454668
Q9C0G6;Q9C0G6-4;Q9C0G6-2;Q9C0G6-3	29	3	115.491	0.000691374	3.16029	0.00180467	1.5826	0.999998	CF42	PF44	479975	Dynein heavy chain 6_ axonemal OS=Homo sapiens OX=9606 GN=DNAH6 PE=2 SV=3	424.959	486.509	477.033	462.834	2.66542	0.0716048	3	729	281.835	305.438	290.081	292.451	2.46605	0.04096	11.9788	3	902	0.631871	-0.662297
Q8WXX0;Q8WXX0-4;Q8WXX0-3	27	3	102.296	0.825505	0.0832805	0.231309	1.02191	0.0539387	CF42	PF44	464696	Dynein heavy chain 7_ axonemal OS=Homo sapiens OX=9606 GN=DNAH7 PE=1 SV=2	1015.03	914.474	802.395	910.632	2.95934	0.116807	3	469	818.012	922.069	933.246	891.109	2.94993	0.0713157	63.5501	3	495	0.978561	-0.0312656
Q96JB1;A0A075B6F3;H0Y7V4;Q96JB1-2	15	1	48.8416	0.548926	0.260487	0.16899	1.03963	0.0806333	PF44	CF42	518315	Dynein heavy chain 8_ axonemal OS=Homo sapiens OX=9606 GN=DNAH8 PE=1 SV=2	2512.22	2051.7	2394.33	2319.42	3.36538	0.10314	3	227	2510.67	2355.15	2368.21	2411.34	3.38226	0.0357764	86.2693	3	230	1.03963	0.0560757
Q9NYC9;E7EP17;Q9NYC9-2;Q9NYC9-3;J3QLM9	21	4	68.0434	0.00207312	2.68337	0.0036284	1.10499	0.999	PF44	CF42	515927	Dynein heavy chain 9_ axonemal OS=Homo sapiens OX=9606 GN=DNAH9 PE=1 SV=3	1826.47	1841.26	1893.58	1853.77	3.26806	0.0190191	3	280	2084.75	2029.98	2030.46	2048.39	3.31141	0.0153704	31.4846	3	259	1.10499	0.14403
Q96M86;Q96M86-4	18	2	71.2217	0.303112	0.518397	0.1087	7.42715	0.151059	PF44	CF42	539804	Dynein heavy chain domain-containing protein 1 OS=Homo sapiens OX=9606 GN=DNHD1 PE=2 SV=2	40.8867	39.7027	31.9663	37.5186	1.57425	0.129128	3	1439	744.505	55.1223	36.3401	278.656	2.44507	1.44819	403.547	3	917	7.42715	2.89281
P63167;F8VRV5;F8VXI7;F8VXL2;Q96FJ2	2	1	23.0232	0.0951736	1.02148	0.0465275	1.12391	0.384428	PF44	CF42	10537	Dynein light chain 1_ cytoplasmic OS=Homo sapiens OX=9606 GN=DYNLL1 PE=1 SV=1	714.198	712.581	619.599	682.126	2.83386	0.0793927	3	566	805.901	733.926	760.112	766.646	2.8846	0.047518	36.4295	3	543	1.12391	0.168523
P11532;P11532-4;A0A075B6G3;A0A087WTU7;A0A087WV90;E9PDN5;P11532-2;P11532-3;E7EQR9;E7EQS5;E7ESB2;F8VX32;H0Y304;Q4G0X0;F5GZY3;P11532-5;P11532-6;P11532-7;P11532-8	24	1	85.6799	0.010069	1.99701	0.00974529	1.86574	0.921911	CF42	PF44	428803	Dystrophin OS=Homo sapiens OX=9606 GN=DMD PE=1 SV=3	412.876	378.711	455.208	415.598	2.61867	0.0922065	3	752	169.808	250.01	248.439	222.752	2.34782	0.20587	45.858	3	1001	0.53598	-0.89975
Q14258	2	1	14.6094	0.291304	0.535654	0.105431	2.03875	0.156989	PF44	CF42	72627.3	E3 ubiquitin/ISG15 ligase TRIM25 OS=Homo sapiens OX=9606 GN=TRIM25 PE=1 SV=2	18.3236	82.859	49.5648	50.2491	1.70113	0.642264	3	1407	38.3309	132.031	136.974	102.445	2.01049	0.542531	55.5798	3	1243	2.03875	1.02768
Q76N89;Q76N89-2;A0A2C9F2N4;A0A2R8Y6F3;A0A2R8YE75;Q9P2P5	10	2	35.8827	0.00293277	2.53272	0.00434065	1.35803	0.996289	CF42	PF44	180922	E3 ubiquitin-protein ligase HECW1 OS=Homo sapiens OX=9606 GN=HECW1 PE=1 SV=3	2500.14	2522.88	2525.01	2516.01	3.40071	0.00547848	3	214	1916.14	1959.43	1682.51	1852.69	3.2678	0.0804037	148.963	3	290	0.736362	-0.441513
Q7Z6Z7;Q7Z6Z7-2;Q7Z6Z7-3;A0A087X1S3	3	2	11.6329	0.00103072	2.98686	0.00225343	1.30079	0.999971	CF42	PF44	485826	E3 ubiquitin-protein ligase HUWE1 OS=Homo sapiens OX=9606 GN=HUWE1 PE=1 SV=3	1170.16	1082.95	1075.66	1109.59	3.04516	0.0473846	3	416	828.81	869.898	860.334	853.014	2.93096	0.0252045	21.4998	3	505	0.768764	-0.379387
Q96J02;Q96J02-2;Q96J02-3	2	1	9.288	1.79573e-05	4.74576	0.000161127	1.81638	1	CF42	PF44	103658	E3 ubiquitin-protein ligase Itchy homolog OS=Homo sapiens OX=9606 GN=ITCH PE=1 SV=2	1119.94	1099.49	1087.85	1102.43	3.04235	0.0147362	3	418	627.588	579.966	613.26	606.938	2.78314	0.0402552	24.4324	3	623	0.550545	-0.861067
Q63HN8;A0A0A0MTR7;Q63HN8-6;Q63HN8-5	40	4	151.104	0.848362	0.0714187	0.23619	1.04533	0.0529567	PF44	CF42	598936	E3 ubiquitin-protein ligase RNF213 OS=Homo sapiens OX=9606 GN=RNF213 PE=1 SV=3	143.109	224.681	175.63	181.14	2.25801	0.226699	3	1071	156.298	164.811	246.941	189.35	2.27727	0.26436	50.0565	3	1060	1.04533	0.063952
Q9Y252;Q9Y252-2;Q9Y252-3	5	1	26.3077	3.07586e-05	4.51203	0.000232413	2.89596	1	CF42	PF44	78490.5	E3 ubiquitin-protein ligase RNF6 OS=Homo sapiens OX=9606 GN=RNF6 PE=1 SV=1	262.248	227.124	232.018	240.463	2.38105	0.079113	3	970	79.169	85.4371	84.4966	83.0342	1.91926	0.0407091	3.38025	3	1291	0.345309	-1.53404
Q14669;Q14669-2;Q14669-3;Q14669-4	4	1	12.0737	0.946985	0.023657	0.257164	1.01281	0.0503557	CF42	PF44	222373	E3 ubiquitin-protein ligase TRIP12 OS=Homo sapiens OX=9606 GN=TRIP12 PE=1 SV=1	274.767	200.134	231.396	235.432	2.37187	0.159196	3	978	259.195	214.8	223.369	232.455	2.36634	0.101312	23.5506	3	985	0.987352	-0.0183631
Q5T4S7;Q5T4S7-2;Q5T4S7-3;Q5T4S7-4	8	1	21.7053	0.0267963	1.57193	0.0188579	1.20745	0.726264	PF44	CF42	580913	E3 ubiquitin-protein ligase UBR4 OS=Homo sapiens OX=9606 GN=UBR4 PE=1 SV=1	958.89	844.084	873.162	892.045	2.95039	0.0669103	3	480	999.297	1145.6	1086.42	1077.1	3.03226	0.0683265	73.5947	3	430	1.20745	0.271969
Q15075	3	1	11.2937	0.00852306	2.0694	0.00863672	1.04953	0.941967	PF44	CF42	163435	Early endosome antigen 1 OS=Homo sapiens OX=9606 GN=EEA1 PE=1 SV=2	1278.18	1261.74	1236.03	1258.65	3.09991	0.0168789	3	383	1316.35	1326.97	1319.66	1320.99	3.1209	0.00411371	5.43418	3	367	1.04953	0.0697422
Q9HC35;B5MBZ0;Q9HC35-2	6	1	22.5849	0.103837	0.983647	0.0495413	1.38707	0.362831	CF42	PF44	110000	Echinoderm microtubule-associated protein-like 4 OS=Homo sapiens OX=9606 GN=EML4 PE=1 SV=3	120.792	121.649	186.99	143.144	2.15577	0.265288	3	1160	105.646	104.553	99.397	103.199	2.01367	0.032339	3.33735	3	1241	0.720946	-0.472038
Q05BV3;Q05BV3-5;Q05BV3-2;Q05BV3-4;H0YJS1	15	2	67.2908	0.113592	0.944651	0.053005	1.2738	0.34117	CF42	PF44	222506	Echinoderm microtubule-associated protein-like 5 OS=Homo sapiens OX=9606 GN=EML5 PE=2 SV=3	310.052	275.318	217.678	267.683	2.42762	0.174303	3	933	219.312	221.908	189.216	210.146	2.32252	0.0864743	18.1722	3	1019	0.785054	-0.349137
C9J1V9;D6RBD7;O43324;O43324-2;D6RCQ0;H0YAL7	3	2	17.3072	0.000338962	3.46985	0.00109713	9.67142	1	CF42	PF44	17017.6	EEF1E1-BLOC1S5 readthrough (NMD candidate) OS=Homo sapiens OX=9606 GN=EEF1E1-BLOC1S5 PE=4 SV=2	117.539	143.86	119.238	126.879	2.10339	0.116099	3	1195	17.5589	12.7594	9.03837	13.1189	1.1179	0.325609	4.27163	3	1496	0.103397	-3.27373
A8K855;A8K855-2	3	2	12.0515	0.0651803	1.18588	0.0354008	9.98482	0.483788	CF42	PF44	73064.9	EF-hand calcium-binding domain-containing protein 7 OS=Homo sapiens OX=9606 GN=EFCAB7 PE=1 SV=1	177.165	116.76	113.136	135.687	2.13254	0.265071	3	1175	25.8391	14.9289		20.384	1.30929	0.378465	7.71463	2	1478	0.150228	-2.73477
Q8N3D4;A0A0U1RQH4;E9PIH6;H0YDZ9	5	1	17.4691	0.174627	0.757888	0.0723183	192.117	0.246868	PF44	CF42	162653	EH domain-binding protein 1-like protein 1 OS=Homo sapiens OX=9606 GN=EHBP1L1 PE=1 SV=2			2.52714	2.52714	0.402629	#DIV/0!	1	1521	358.487		127.019	242.753	2.38516	0.674235	163.672	2	966	96.0583	6.58584
Q9H4M9;A0A024R571;C9J2Z4;C9JC03;C9IZH1;C9JIJ3;Q9NZN3-2	7	3	48.4836	0.00959963	2.01775	0.00941802	1.43247	0.928063	CF42	PF44	60684	EH domain-containing protein 1 OS=Homo sapiens OX=9606 GN=EHD1 PE=1 SV=2	407.028	361.477	394.035	387.513	2.58829	0.060554	3	781	246.564	308.736	256.263	270.521	2.4322	0.123645	33.4487	3	928	0.698095	-0.518505
Q9NZN4;Q9NZN4-2	11	3	57.0026	0.670241	0.173769	0.197448	1.04709	0.0650179	CF42	PF44	61332.6	EH domain-containing protein 2 OS=Homo sapiens OX=9606 GN=EHD2 PE=1 SV=2	411.265	362.113	328.273	367.217	2.56492	0.113641	3	802	297.497	395.102	359.508	350.702	2.54494	0.140845	49.3948	3	822	0.955028	-0.0663844
Q9NZN3	3	1	19.8155	0.00454167	2.34278	0.00570284	1.94394	0.98596	CF42	PF44	60944.3	EH domain-containing protein 3 OS=Homo sapiens OX=9606 GN=EHD3 PE=1 SV=2	136.497	128.864	158.224	141.195	2.14982	0.107888	3	1164	63.9218	87.6222	66.3563	72.6334	1.86114	0.179499	13.0376	3	1322	0.51442	-0.958982
Q9H223	8	1	44.3917	0.134793	0.870333	0.059179	1.896	0.301702	CF42	PF44	61403.4	EH domain-containing protein 4 OS=Homo sapiens OX=9606 GN=EHD4 PE=1 SV=1	156.886	183.341	133.187	157.805	2.19812	0.158993	3	1123	33.2822	84.2799	132.128	83.2302	1.92028	0.593913	49.4315	3	1289	0.527425	-0.922961
Q92616	14	2	61.1101	0.000498888	3.302	0.00141434	1.17713	1	PF44	CF42	295154	eIF-2-alpha kinase activator GCN1 OS=Homo sapiens OX=9606 GN=GCN1 PE=1 SV=6	6687.37	6601.2	6711.77	6666.78	3.82392	0.00871315	3	75	8003.38	7920.39	7619.14	7847.63	3.89474	0.0257645	202.191	3	67	1.17713	0.235268
Q15717;Q15717-2;M0QZR9	4	3	25.774	0.764129	0.116833	0.217246	1.01479	0.0573461	CF42	PF44	36263	ELAV-like protein 1 OS=Homo sapiens OX=9606 GN=ELAVL1 PE=1 SV=2	604.984	546.232	616.494	589.236	2.77029	0.0639561	3	630	558.901	598.448	584.597	580.649	2.76391	0.0345598	20.0671	3	646	0.985426	-0.0211812
P13804;H0YLU7;H0YK49;H0YKF0;P13804-2;H0YL12;H0YNX6;J3KN60	8	4	47.5068	0.00100753	2.99674	0.00221397	1.31503	0.999974	PF44	CF42	35421.8	Electron transfer flavoprotein subunit alpha_ mitochondrial OS=Homo sapiens OX=9606 GN=ETFA PE=1 SV=1	494.442	459.418	454.439	469.433	2.67157	0.046441	3	727	632.347	596.11	623.502	617.32	2.79051	0.0306052	18.8932	3	620	1.31503	0.395099
P38117;P38117-2	3	2	17.699	0.329235	0.482494	0.115472	1.1856	0.139206	PF44	CF42	28071.8	Electron transfer flavoprotein subunit beta OS=Homo sapiens OX=9606 GN=ETFB PE=1 SV=3	396.36	399.605	340.197	378.721	2.57832	0.0881972	3	788	480.895	524.548	341.596	449.013	2.65226	0.212804	95.5518	3	745	1.1856	0.245623
P57679;E9PCN4	4	1	13.6471	0.67487	0.17078	0.198269	3.2885	0.0645609	CF42	PF44	112960	Ellis-van Creveld syndrome protein OS=Homo sapiens OX=9606 GN=EVC PE=1 SV=1	665.458	764.808		715.133	2.85439	0.0982348	2	551	416.766	18.1636		217.465	2.33739	1.29609	281.854	2	1009	0.30409	-1.71743
P24534;C9JZW3;F2Z2G2;F8WF65	3	3	22.7795	0.00614668	2.21136	0.00705958	1.15659	0.970389	PF44	CF42	24934.8	Elongation factor 1-beta OS=Homo sapiens OX=9606 GN=EEF1B2 PE=1 SV=3	1725.25	1695.86	1670	1697.04	3.22969	0.0162881	3	305	2030.86	1865.27	1992.2	1962.77	3.29287	0.044136	86.629	3	268	1.15659	0.209877
P29692;A0A087X1X7;E9PK01;E9PRY8;P29692-2;E9PI39;E9PL12;E9PPR1;E9PQ49;E9PIZ1;E9PMW7;H0YCK7;P29692-3;E9PL71;P29692-4;E9PK06;E9PN91;E9PQZ1;E9PK72;E9PKK3;E9PQC9;H0YE58;H0YE72	8	7	63.8061	0.35294	0.452299	0.121803	1.0302	0.129746	CF42	PF44	31235.9	Elongation factor 1-delta OS=Homo sapiens OX=9606 GN=EEF1D PE=1 SV=5	3406.75	3422.19	3535.79	3454.91	3.53844	0.0203972	3	158	3491.45	3379.27	3190.19	3353.64	3.52552	0.0454002	152.256	3	160	0.970687	-0.0429217
P26641;P26641-2	12	10	76.1922	0.00668611	2.17483	0.00749999	1.08244	0.964353	CF42	PF44	50461	Elongation factor 1-gamma OS=Homo sapiens OX=9606 GN=EEF1G PE=1 SV=3	3009.34	2928.04	2900.82	2946.06	3.46924	0.0191662	3	181	2666.49	2764.42	2734.19	2721.7	3.43484	0.0184248	50.1469	3	200	0.923842	-0.114282
P13639	50	33	348.751	0.024992	1.6022	0.0178506	1.19791	0.74391	CF42	PF44	96307.8	Elongation factor 2 OS=Homo sapiens OX=9606 GN=EEF2 PE=1 SV=4	8321.46	7570.72	7387.6	7759.93	3.88986	0.0637694	3	63	6777.79	6639.38	6016.5	6477.89	3.81143	0.0626009	405.522	3	85	0.834787	-0.260519
P49411	9	6	46.8526	0.00530478	2.27533	0.00629405	1.5135	0.979075	CF42	PF44	49883.8	Elongation factor Tu_ mitochondrial OS=Homo sapiens OX=9606 GN=TUFM PE=1 SV=2	304.428	278.664	320.788	301.293	2.47899	0.0704835	3	890	225.037	184.375	187.801	199.071	2.29901	0.11329	22.5527	3	1046	0.660722	-0.597884
E5RHG8;Q15369;Q15369-2;R4GMY8	2	1	13.5499	0.754949	0.122082	0.215905	1.06186	0.057958	CF42	PF44	10074.2	Elongin-C (Fragment) OS=Homo sapiens OX=9606 GN=ELOC PE=1 SV=1	470.058	683.412	462.191	538.554	2.73123	0.233055	3	669	475.046	545.096	501.396	507.179	2.70516	0.0697604	35.381	3	706	0.941743	-0.0865947
P17813;P17813-2;F5GX88	6	3	31.3832	0.000846559	3.07234	0.00198103	1.53275	0.999992	CF42	PF44	71604.7	Endoglin OS=Homo sapiens OX=9606 GN=ENG PE=1 SV=2	201.845	203.418	197.621	200.961	2.30311	0.0149171	3	1032	120.097	141.189	132.049	131.112	2.11764	0.0806723	10.5771	3	1173	0.652423	-0.616121
Q99961;M0QYE0;M0R0I3;Q99961-2;Q99961-3;Q99962	5	2	28.6929	0.182242	0.739351	0.0743334	1.39746	0.238419	CF42	PF44	41718.1	Endophilin-A2 OS=Homo sapiens OX=9606 GN=SH3GL1 PE=1 SV=1	351.896	353.365	202.503	302.588	2.48085	0.286459	3	886	227.503	200.805	221.272	216.527	2.33551	0.0645075	13.9676	3	1012	0.715583	-0.48281
P11021;O95399;O95399-2;Q5H8X8	45	33	287.739	0.326854	0.485647	0.114824	1.01313	0.140221	CF42	PF44	72447.1	Endoplasmic reticulum chaperone BiP OS=Homo sapiens OX=9606 GN=HSPA5 PE=1 SV=2	13987.1	13629.1	13481	13699.1	4.13669	0.018992	3	39	13453.8	13625	13485.6	13521.5	4.13102	0.00673494	91.0662	3	40	0.987036	-0.0188256
P30040;F8VY02;P30040-2	3	2	19.3549	0.306236	0.513944	0.109365	1.203	0.149553	CF42	PF44	29050.5	Endoplasmic reticulum resident protein 29 OS=Homo sapiens OX=9606 GN=ERP29 PE=1 SV=4	446.074	361.091	274.879	360.681	2.55712	0.237324	3	812	296.654	311.348	291.453	299.818	2.47686	0.0344151	10.3183	3	891	0.831255	-0.266637
Q9BS26	2	1	12.949	4.03511e-06	5.39414	7.55609e-05	1.81297	1	PF44	CF42	47370.5	Endoplasmic reticulum resident protein 44 OS=Homo sapiens OX=9606 GN=ERP44 PE=1 SV=1	2033.79	1980.07	1946.32	1986.73	3.29814	0.0222046	3	263	3683.67	3562.32	3559.65	3601.88	3.55653	0.0196684	70.8434	3	147	1.81297	0.858357
P14625;A0A1W2PRR1;Q96GW1;F8W026;H0YIV0	51	34	341.577	0.206956	0.684122	0.0814762	1.04966	0.214266	PF44	CF42	92754.2	Endoplasmin OS=Homo sapiens OX=9606 GN=HSP90B1 PE=1 SV=1	7283.59	7254.26	6904.65	7147.5	3.85415	0.0294964	3	67	7104.14	7710.23	7692.96	7502.44	3.8752	0.0459916	345.049	3	70	1.04966	0.0699216
G3V279;P84090	1	1	6.5185	0.550322	0.259383	0.169059	1.08127	0.0804073	CF42	PF44	8374.43	Enhancer of rudimentary homolog OS=Homo sapiens OX=9606 GN=ERH PE=1 SV=1	678.98	858.729	686.242	741.317	2.87	0.137251	3	544	902.466	78.6491	1075.68	685.599	2.83607	0.777016	532.721	3	585	0.924839	-0.112726
P30084	4	3	23.3763	0.296553	0.527897	0.106845	1.45696	0.154304	PF44	CF42	31843.7	Enoyl-CoA hydratase_ mitochondrial OS=Homo sapiens OX=9606 GN=ECHS1 PE=1 SV=4	118.451	50.1447	19.0376	62.5443	1.79619	0.813075	3	1364	89.0304	92.2694	92.0746	91.1248	1.95964	0.0199333	1.81642	3	1271	1.45696	0.542965
Q92817;K7EKI0	5	1	12.4307	2.99948e-05	4.52295	0.000232413	5.33105	1	PF44	CF42	232916	Envoplakin OS=Homo sapiens OX=9606 GN=EVPL PE=1 SV=3	83.5718	63.8013	74.3528	73.9086	1.8687	0.13385	3	1334	396.887	402.915	382.229	394.01	2.59551	0.027002	10.6391	3	784	5.33105	2.41442
A0A0B4J1T8;J3KR66;Q9UF33;P54762;P54762-5	3	1	11.4707	0.285147	0.544931	0.103312	1.55541	0.160239	PF44	CF42	128330	Ephrin type-A receptor 6 OS=Homo sapiens OX=9606 GN=EPHA6 PE=1 SV=1	33.5119	14.5932	6.51361	18.2062	1.26022	0.761115	3	1497	19.3439	30.4123	35.1984	28.3182	1.45207	0.287168	8.13207	3	1454	1.55541	0.637296
P00533;E9PFD7;Q504U8	3	2	11.4932	0.48756	0.311972	0.154974	1.02479	0.0919182	CF42	PF44	137699	Epidermal growth factor receptor OS=Homo sapiens OX=9606 GN=EGFR PE=1 SV=2	1951.07	2049.29	1955.67	1985.35	3.29784	0.0279193	3	264	1838.38	1944.01	2029.54	1937.31	3.2872	0.0494266	95.7548	3	271	0.975806	-0.0353338
Q9UBC2;Q9UBC2-2;M0R165;M0R2S2;Q9UBC2-3;Q9UBC2-4	4	1	16.5245	0.82401	0.0840674	0.231309	1.0937	0.0540082	CF42	PF44	94369.3	Epidermal growth factor receptor substrate 15-like 1 OS=Homo sapiens OX=9606 GN=EPS15L1 PE=1 SV=1	89.5532	61.2809	37.5598	62.798	1.79795	0.414502	3	1363	51.3057	82.8191	38.1297	57.4182	1.75905	0.399928	22.9632	3	1367	0.914331	-0.129211
A0A075B730;P58107	11	1	47.6047	7.62982e-05	4.11749	0.000450202	3.2403	1	CF42	PF44	555584	Epiplakin OS=Homo sapiens OX=9606 GN=EPPK1 PE=1 SV=2	855.702	791.408	710.331	785.814	2.89532	0.0927025	3	525	263.634	225.783	238.121	242.513	2.38473	0.0795997	19.304	3	967	0.308614	-1.69613
Q96HE7;G3V2H0;G3V3E6;G3V5B3;Q5TAE8;Q86YB8	4	1	22.4203	0.117398	0.93034	0.0538686	1.53629	0.333381	CF42	PF44	55248.1	ERO1-like protein alpha OS=Homo sapiens OX=9606 GN=ERO1A PE=1 SV=2	245.379	237.729	190.797	224.635	2.35148	0.131559	3	994	180.198	168.593	89.8673	146.219	2.16501	0.336112	49.1461	3	1135	0.65092	-0.619447
P27105;P27105-2;F8VSL7	4	1	22.1978	0.685747	0.163836	0.20078	1.11006	0.0635216	PF44	CF42	31901.9	Erythrocyte band 7 integral membrane protein OS=Homo sapiens OX=9606 GN=STOM PE=1 SV=3	48.9825	27.6629	57.9862	44.8772	1.65203	0.347012	3	1425	50.8665	63.3462	35.2363	49.8163	1.69737	0.282726	14.0844	3	1389	1.11006	0.150636
P60842;J3KT12;P60842-2;J3KSZ0;J3QS69;J3KTB5;J3KTN0;J3QL43;J3QR64;J3QLN6;J3KS25;J3QKZ9;J3QL52	17	8	141.322	0.0801389	1.09616	0.0411504	1.11918	0.428564	CF42	PF44	46382.2	Eukaryotic initiation factor 4A-I OS=Homo sapiens OX=9606 GN=EIF4A1 PE=1 SV=1	2698.29	2611.68	2613.55	2641.17	3.4218	0.0187324	3	201	2572.74	2325.87	2181.17	2359.93	3.3729	0.0838985	197.994	3	232	0.893514	-0.162437
Q14240;Q14240-2;E7EQG2;J3KSN7;E7EMV8;J3KS93;J3KT04;E9PBH4;F8WE11;J3QQP0;I3L3H2	17	4	92.2298	0.112245	0.949833	0.0524331	1.08016	0.344012	PF44	CF42	46630.5	Eukaryotic initiation factor 4A-II OS=Homo sapiens OX=9606 GN=EIF4A2 PE=1 SV=2	3031.74	2837.68	2908.93	2926.12	3.46629	0.0335479	3	182	3338.34	3159.16	2984.54	3160.68	3.49978	0.0559715	176.908	3	173	1.08016	0.111248
H3BR35;P15170;P15170-2;P15170-3;Q8IYD1	2	1	7.7135	0.00170586	2.76806	0.00321156	2.27754	0.999574	CF42	PF44	53345.7	Eukaryotic peptide chain release factor GTP-binding subunit ERF3A (Fragment) OS=Homo sapiens OX=9606 GN=GSPT1 PE=1 SV=1	109.609	85.6909	77.3918	90.8971	1.95855	0.184026	3	1288	38.0734	42.5797	39.0776	39.9102	1.60108	0.0592764	2.36574	3	1421	0.439071	-1.18747
P62495;B7Z7P8;P62495-2;D6RCB3;D6RJE8;I3L492	5	3	28.1505	0.235465	0.628073	0.0893512	1.07007	0.191327	CF42	PF44	49259.1	Eukaryotic peptide chain release factor subunit 1 OS=Homo sapiens OX=9606 GN=ETF1 PE=1 SV=3	473.674	432.657	405.668	437.333	2.64081	0.078301	3	742	397.068	416.261	412.755	408.695	2.6114	0.0250074	10.2204	3	774	0.934516	-0.0977081
P05198;G3V4T5;H0YJS4	8	4	39.9326	0.0322371	1.49164	0.0216605	1.1093	0.677735	PF44	CF42	36397.4	Eukaryotic translation initiation factor 2 subunit 1 OS=Homo sapiens OX=9606 GN=EIF2S1 PE=1 SV=3	1098.53	1174.99	1189.46	1154.33	3.06233	0.042325	3	405	1274.08	1329.47	1237.94	1280.5	3.10738	0.0360018	46.1001	3	374	1.1093	0.149653
P41091;Q2VIR3-2;H7BZU1	9	2	53.061	0.256205	0.591413	0.0951562	1.07509	0.177186	CF42	PF44	51679.8	Eukaryotic translation initiation factor 2 subunit 3 OS=Homo sapiens OX=9606 GN=EIF2S3 PE=1 SV=3	903.198	872.894	810.314	862.135	2.93558	0.0549422	3	496	770.705	875.817	759.242	801.921	2.90413	0.0801224	64.2518	3	526	0.930157	-0.104453
Q14152;Q14152-2	16	5	78.4328	0.0870771	1.0601	0.0436089	1.6755	0.407014	CF42	PF44	166969	Eukaryotic translation initiation factor 3 subunit A OS=Homo sapiens OX=9606 GN=EIF3A PE=1 SV=1	346.043	646.242	645.235	545.84	2.73707	0.316998	3	664	350.394	304.935	322.002	325.777	2.51292	0.0704878	22.9633	3	855	0.596836	-0.744593
P55884;P55884-2;C9JQN7;C9JZG1	4	2	18.7649	0.00336437	2.4731	0.00475088	1.93773	0.994162	CF42	PF44	92880.9	Eukaryotic translation initiation factor 3 subunit B OS=Homo sapiens OX=9606 GN=EIF3B PE=1 SV=3	524.195	396.497	517.579	479.424	2.68072	0.149956	3	718	271.396	226.205	244.644	247.415	2.39343	0.0918412	22.7229	3	955	0.516067	-0.954369
Q99613;B5ME19;Q99613-2;H3BPE3;H3BPE4;H3BTY8	9	5	45.1099	0.181522	0.74107	0.0741752	1.1308	0.239196	PF44	CF42	106028	Eukaryotic translation initiation factor 3 subunit C OS=Homo sapiens OX=9606 GN=EIF3C PE=1 SV=1	526.31	527.77	491.784	515.288	2.71205	0.0395278	3	685	506.275	638.034	603.76	582.69	2.76544	0.117318	68.36	3	643	1.1308	0.177349
O15371;O15371-2;O15371-3;B0QYA4;B0QYA5	4	2	20.9154	0.161114	0.792867	0.0679987	1.46682	0.263271	CF42	PF44	64600.2	Eukaryotic translation initiation factor 3 subunit D OS=Homo sapiens OX=9606 GN=EIF3D PE=1 SV=1	252.971	261.654	181.857	232.161	2.36579	0.188578	3	982	100.387	178.324	196.112	158.274	2.19941	0.321687	50.9147	3	1104	0.681745	-0.552696
P60228;E5RGA2;E5RIT4;H0YBR5;H0YAW4	5	2	28.4869	0.869263	0.0608488	0.2403	1.00961	0.0521875	PF44	CF42	52620.1	Eukaryotic translation initiation factor 3 subunit E OS=Homo sapiens OX=9606 GN=EIF3E PE=1 SV=1	322.052	407.1	365.849	365.001	2.56229	0.116521	3	803	382.006	377.963	345.553	368.507	2.56645	0.0542218	19.9811	3	803	1.00961	0.0137945
O00303;H0YDT6	2	2	13.8851	0.00822776	2.08472	0.00855636	2.17018	0.945706	PF44	CF42	37678	Eukaryotic translation initiation factor 3 subunit F OS=Homo sapiens OX=9606 GN=EIF3F PE=1 SV=1	185.846	110.14	129.04	141.675	2.15129	0.278123	3	1163	310.145	278.392	333.846	307.461	2.48779	0.0904957	27.8239	3	883	2.17018	1.11781
Q13347	3	2	17.6091	0.310078	0.508529	0.110462	1.11161	0.147736	PF44	CF42	36901.1	Eukaryotic translation initiation factor 3 subunit I OS=Homo sapiens OX=9606 GN=EIF3I PE=1 SV=1	193.608	192.591	146.862	177.687	2.24966	0.150266	3	1081	209.994	195.035	187.526	197.518	2.29561	0.0579069	11.4377	3	1049	1.11161	0.152647
B0QY89;Q9Y262;Q9Y262-2;B0QY90;C9JHP4;C9K0Q7	5	4	31.9287	0.1939	0.712421	0.0777599	1.24248	0.226451	PF44	CF42	71130.1	Eukaryotic translation initiation factor 3 subunit L OS=Homo sapiens OX=9606 GN=EIF3L PE=1 SV=1	304.626	276.519	194.861	258.669	2.41274	0.220429	3	945	295.285	359.731	309.159	321.392	2.50703	0.10554	33.9198	3	864	1.24248	0.313225
Q04637;E7EUU4;E7EX73;E9PGM1;Q04637-3;Q04637-4;Q04637-5;Q04637-6;Q04637-7;Q04637-8;Q04637-9;C9JF13;C9J6B6;C9J2Z7;C9K073;H7C0V6;H7C044	18	6	96.2664	0.0019679	2.706	0.00354629	1.60994	0.999197	PF44	CF42	176233	Eukaryotic translation initiation factor 4 gamma 1 OS=Homo sapiens OX=9606 GN=EIF4G1 PE=1 SV=4	474.212	443.378	383.246	433.612	2.6371	0.106692	3	744	728.828	679.743	685.702	698.091	2.84391	0.0383699	26.7857	3	579	1.60994	0.68701
P78344;D3DQV9;H0Y3P2;P78344-2;E9PKF8;H0YCH5;H0YD77;H0YEC5	3	1	13.7113	0.200483	0.697921	0.0798033	1.34467	0.220157	CF42	PF44	102875	Eukaryotic translation initiation factor 4 gamma 2 OS=Homo sapiens OX=9606 GN=EIF4G2 PE=1 SV=1	81.0107	98.4219	58.2594	79.2307	1.89889	0.254199	3	1326	53.7696	71.8372	51.1598	58.9222	1.77028	0.191109	11.2606	3	1361	0.743679	-0.427248
E7EX17;F8VX11;P23588;P23588-2	1	1	5.6852	0.222728	0.652225	0.0863438	1.09903	0.201016	CF42	PF44	69754.8	Eukaryotic translation initiation factor 4B OS=Homo sapiens OX=9606 GN=EIF4B PE=1 SV=1	169.894	198.263	200.523	189.56	2.27775	0.0900443	3	1057	172.672	161.67	183.098	172.48	2.23674	0.0621225	10.7149	3	1085	0.909897	-0.136226
Q6IS14;C9J4W5;C9J7B5;F8WCJ1;I3L397;I3L504;P63241;P63241-2;Q9GZV4	4	4	13.2344	1.53668e-05	4.81342	0.000146016	1.92272	1	CF42	PF44	17001.3	Eukaryotic translation initiation factor 5A-1-like OS=Homo sapiens OX=9606 GN=EIF5AL1 PE=2 SV=2	994.467	1002.31	1069.35	1022.04	3.00947	0.0402679	3	441	518.346	539.239	537.093	531.559	2.72555	0.0216213	11.493	3	683	0.520096	-0.943151
P56537;P56537-2;A0A0B4J1Y7;A0A0U1RQV5;B7ZBH1;F8WD20;F8WDS6	3	1	18.9531	0.0245164	1.61054	0.0175692	1.19926	0.7487	PF44	CF42	27112.4	Eukaryotic translation initiation factor 6 OS=Homo sapiens OX=9606 GN=EIF6 PE=1 SV=1	716.636	768.014	839.826	774.826	2.8892	0.0798589	3	533	884.736	944.309	958.615	929.22	2.96812	0.0421675	39.1829	3	481	1.19926	0.262148
Q96KP1	4	1	14.2057	0.279276	0.553967	0.101504	1.05396	0.163448	CF42	PF44	105150	Exocyst complex component 2 OS=Homo sapiens OX=9606 GN=EXOC2 PE=1 SV=1	1416.22	1463.53	1341.68	1407.14	3.14834	0.0436562	3	350	1327.19	1260.38	1417.74	1335.1	3.12551	0.0591527	78.9749	3	362	0.948805	-0.0758168
P55060;P55060-3;P55060-4;P55060-2	9	5	45.696	0.049686	1.30377	0.0291944	1.17962	0.558627	PF44	CF42	111215	Exportin-2 OS=Homo sapiens OX=9606 GN=CSE1L PE=1 SV=3	947.217	913.77	797.453	886.146	2.94751	0.0887105	3	482	1089.71	1058.81	987.419	1045.31	3.01925	0.0501897	52.4639	3	440	1.17962	0.238317
Q9BSJ8;Q9BSJ8-2	11	6	59.1756	0.0598468	1.22296	0.0333836	1.8975	0.507129	CF42	PF44	123370	Extended synaptotagmin-1 OS=Homo sapiens OX=9606 GN=ESYT1 PE=1 SV=1	300.309	554.493	611.062	488.622	2.68897	0.338745	3	708	259.622	282.042	230.858	257.507	2.41079	0.0996381	25.6576	3	945	0.527008	-0.924103
P15311;E7EQR4	22	8	127.579	0.0109566	1.96032	0.0102165	1.15241	0.910204	PF44	CF42	69527	Ezrin OS=Homo sapiens OX=9606 GN=EZR PE=1 SV=4	4637.66	4459.04	4578.26	4558.32	3.6588	0.0199552	3	109	5564.14	5079.05	5115.97	5253.05	3.72041	0.0514065	270.041	3	104	1.15241	0.204654
Q9Y5B9;G3V2X0;G3V401;G3V5A4	6	2	26.0624	0.103984	0.983033	0.0495413	1.65236	0.362485	PF44	CF42	120484	FACT complex subunit SPT16 OS=Homo sapiens OX=9606 GN=SUPT16H PE=1 SV=1	131.907	69.2532	51.6363	84.2655	1.92565	0.500662	3	1309	138.009	137.332	142.37	139.237	2.14375	0.0196363	2.7341	3	1152	1.65236	0.724529
P52907	6	4	40.1656	0.110863	0.955215	0.052013	1.10022	0.346976	CF42	PF44	33093.9	F-actin-capping protein subunit alpha-1 OS=Homo sapiens OX=9606 GN=CAPZA1 PE=1 SV=3	1465.15	1475.68	1314.67	1418.5	3.15183	0.0634976	3	349	1276.77	1234.31	1356.78	1289.29	3.11035	0.0482315	62.1842	3	373	0.908909	-0.137792
P47755;F8W9N7;C9JUG7;P47755-2;A0A0D9SET8;F8WED3	8	1	33.1381	0.103067	0.986879	0.0492682	1.09802	0.364653	CF42	PF44	33177.2	F-actin-capping protein subunit alpha-2 OS=Homo sapiens OX=9606 GN=CAPZA2 PE=1 SV=3	1364.5	1330.74	1199.75	1298.33	3.11338	0.0670293	3	376	1185.5	1141.49	1220.28	1182.42	3.07277	0.0333943	39.4861	3	394	0.910727	-0.134909
P47756;B1AK87;B1AK88;P47756-2;B1AK85	10	6	54.8464	0.00203169	2.69214	0.00359427	1.42613	0.999081	CF42	PF44	31635.7	F-actin-capping protein subunit beta OS=Homo sapiens OX=9606 GN=CAPZB PE=1 SV=4	873.665	814.849	867.08	851.865	2.93037	0.0378288	3	499	650.106	581.962	559.913	597.327	2.77621	0.0787154	47.0188	3	629	0.701199	-0.512104
E9PEB5;Q96AE4;Q96AE4-2;C9JSZ1	5	4	25.5699	0.0336521	1.47299	0.0222297	1.25468	0.666165	PF44	CF42	69075.1	Far upstream element-binding protein 1 OS=Homo sapiens OX=9606 GN=FUBP1 PE=1 SV=1	405.333	431.13	347.948	394.804	2.59638	0.107848	3	770	517.221	506.269	462.561	495.35	2.69491	0.0583817	28.9194	3	714	1.25468	0.327314
A0A087WTP3;Q92945;M0QYH3;M0R0I5;M0QXW7;M0R3J3	5	4	32.1728	0.558793	0.252749	0.171065	1.02508	0.0790629	PF44	CF42	73484.1	Far upstream element-binding protein 2 OS=Homo sapiens OX=9606 GN=KHSRP PE=1 SV=1	773.264	771.304	873.295	805.955	2.90631	0.0723699	3	516	815.481	830.225	832.809	826.171	2.91707	0.0113151	9.34825	3	516	1.02508	0.0357426
Q16658;A0A0A0MSB2;C9JFC0;C9JPH9	16	14	95.3149	0.00789033	2.10291	0.00831985	1.19251	0.949925	CF42	PF44	55157.3	Fascin OS=Homo sapiens OX=9606 GN=FSCN1 PE=1 SV=3	1920.26	2013.63	1947.33	1960.41	3.29235	0.0245049	3	266	1541.29	1722.64	1667.85	1643.93	3.21588	0.0565791	93.0119	3	312	0.838564	-0.254006
A0A0U1RQF0;P49327;A0A0U1RRG3;J3KTF0	27	10	167.129	0.000941395	3.02623	0.00213397	1.85613	0.999983	CF42	PF44	275822	Fatty acid synthase OS=Homo sapiens OX=9606 GN=FASN PE=1 SV=1	1296.56	1110.41	1063.12	1156.7	3.06322	0.106694	3	404	578.942	650.919	639.674	623.178	2.79461	0.0621335	38.7203	3	618	0.538755	-0.892299
A9Z1Z3;A9Z1Z3-3	2	1	5.8983	0.039743	1.40074	0.0248274	1.11335	0.620642	PF44	CF42	202292	Fer-1-like protein 4 OS=Homo sapiens OX=9606 GN=FER1L4 PE=2 SV=1	5424.15	5584.44	5308.2	5438.93	3.73551	0.0255038	3	93	6396.65	6049.38	5720.21	6055.41	3.78214	0.0558611	338.262	3	90	1.11335	0.154902
A0AVI2;A0A286YFD1;A0A286YFJ1;A0A286YEQ6;A0AVI2-2;A0AVI2-4;A0A286YFD8	9	1	38.7375	0.212702	0.672229	0.0834331	1.33917	0.209266	PF44	CF42	240045	Fer-1-like protein 5 OS=Homo sapiens OX=9606 GN=FER1L5 PE=2 SV=3	68.1136	101.407	54.9263	74.8157	1.87399	0.320177	3	1332	123.151	91.1126	86.3103	100.191	2.00083	0.199899	20.0281	3	1250	1.33917	0.421344
Q2WGJ9	10	1	43.8014	0.192831	0.714822	0.0776182	1.0959	0.227503	CF42	PF44	210563	Fer-1-like protein 6 OS=Homo sapiens OX=9606 GN=FER1L6 PE=2 SV=2	1126.12	987.727	1025.73	1046.52	3.01975	0.0683204	3	435	1040.37	919.586	904.882	954.945	2.97998	0.0778491	74.3416	3	471	0.912491	-0.132117
A0A0A0MSP7;Q5JV73	2	1	7.3361	0.960103	0.0176823	0.259255	1.02415	0.0502012	PF44	CF42	195143	FERM and PDZ domain-containing protein 3 (Fragment) OS=Homo sapiens OX=9606 GN=FRMPD3 PE=1 SV=1	238.323	187.046	245.993	223.787	2.34984	0.143213	3	997	176.994	216.524	294.061	229.193	2.3602	0.259837	59.5528	3	991	1.02415	0.0344332
Q9Y2L6;Q9Y2L6-2;E9PGA7	2	1	7.4156	0.522463	0.281945	0.162471	1.27349	0.0851617	PF44	CF42	118902	FERM domain-containing protein 4B OS=Homo sapiens OX=9606 GN=FRMD4B PE=1 SV=4	20.0489	14.2505	51.6142	28.6378	1.45694	0.702155	3	1471	43.7789	19.7949	45.8358	36.4699	1.56193	0.396973	14.4776	3	1429	1.27349	0.348783
Q96AC1;H0YJ34;Q96AC1-3;Q96AC1-2;A0A0U1RRM8;G3V3J0;H0YJB6	16	6	92.0828	0.0339502	1.46916	0.0223217	1.0996	0.663779	PF44	CF42	78488	Fermitin family homolog 2 OS=Homo sapiens OX=9606 GN=FERMT2 PE=1 SV=1	668.213	653.1	672.441	664.585	2.82255	0.0152999	3	582	749.983	752.459	689.898	730.78	2.86379	0.048477	35.426	3	559	1.0996	0.136984
P02792	6	3	35.0149	1.74305e-05	4.75869	0.000159728	1.57167	1	CF42	PF44	20076.7	Ferritin light chain OS=Homo sapiens OX=9606 GN=FTL PE=1 SV=2	3064.31	3025.86	3001.08	3030.42	3.4815	0.0105127	3	178	1907.58	1995.29	1881.56	1928.15	3.28514	0.0309046	59.5887	3	276	0.636264	-0.652303
A0A087WUF6;A0A0A0MQV6;P09038;P09038-1;P09038-2;P09038-3	4	1	27.1615	0.0343646	1.46389	0.0224253	1.42409	0.660489	CF42	PF44	31112.2	Fibroblast growth factor OS=Homo sapiens OX=9606 GN=FGF2 PE=1 SV=2	613.223	537.26	493.624	548.036	2.73881	0.110437	3	663	451.191	325.368	377.939	384.833	2.58527	0.164213	63.1944	3	794	0.702203	-0.510039
P02751;P02751-11;P02751-15;P02751-17;P02751-3;P02751-5;P02751-6;P02751-7;P02751-10;P02751-12;P02751-13;P02751-14;P02751-8;P02751-9;P02751-4;H0Y7Z1;P02751-16;P02751-2;H0Y4K8	27	20	176.448	0.317132	0.49876	0.112417	1.05044	0.144495	CF42	PF44	266218	Fibronectin OS=Homo sapiens OX=9606 GN=FN1 PE=1 SV=4	2372.63	2393.68	2113.59	2293.3	3.36046	0.0680195	3	229	2188.88	2224.96	2135.72	2183.19	3.33909	0.0205615	44.8896	3	243	0.951986	-0.0709879
Q6PIW4	2	1	8.8348	0.0544446	1.26404	0.0310583	2.03633	0.533236	CF42	PF44	74875.5	Fidgetin-like protein 1 OS=Homo sapiens OX=9606 GN=FIGNL1 PE=1 SV=2	159.488	175.189	207.54	180.739	2.25705	0.135564	3	1072	48.0055	118.656	99.6096	88.7571	1.9482	0.411846	36.5543	3	1277	0.491079	-1.02597
P21333;P21333-2;F8WE98;H0Y5C6;H0Y5F3	117	14	821.501	3.21878e-05	4.49231	0.000239019	1.53518	1	PF44	CF42	283477	Filamin-A OS=Homo sapiens OX=9606 GN=FLNA PE=1 SV=4	3556.81	3415.98	3471.43	3481.41	3.54175	0.0203786	3	157	5528.34	5251.83	5253.56	5344.58	3.72791	0.0297775	159.148	3	100	1.53518	0.618405
O75369;O75369-2;O75369-8;O75369-9;O75369-3;O75369-6;O75369-4;O75369-5;E7EN95;O75369-7;A0A0A0MT44;H7C5L4	37	17	253.488	3.68961e-05	4.43302	0.000260508	1.46371	1	PF44	CF42	280331	Filamin-B OS=Homo sapiens OX=9606 GN=FLNB PE=1 SV=2	921.008	882.713	913.425	905.715	2.95699	0.0223893	3	472	1297.7	1318.7	1360.72	1325.71	3.12245	0.0242041	32.0876	3	365	1.46371	0.549634
Q8WUP2;Q8WUP2-2	1	1	5.2387	0.125587	0.901055	0.0565076	2.61951	0.317719	PF44	CF42	42209.6	Filamin-binding LIM protein 1 OS=Homo sapiens OX=9606 GN=FBLIM1 PE=1 SV=2	24.4863	39.4628	24.3172	29.4221	1.46867	0.295556	3	1468	29.5351	98.9693	102.71	77.0715	1.88689	0.534701	41.2102	3	1303	2.61951	1.3893
Q14315;Q14315-2	59	25	404.911	0.0253506	1.59601	0.0180768	1.12432	0.740337	PF44	CF42	293589	Filamin-C OS=Homo sapiens OX=9606 GN=FLNC PE=1 SV=3	2687.76	2600.08	2716.16	2668	3.42619	0.0226783	3	199	2834.81	3152.35	3011.89	2999.68	3.47708	0.0530468	159.123	3	181	1.12432	0.169051
E7ESA6;E9PEI4;H0YB16;H0YBP1;H0YBZ1;Q05397;Q05397-2;Q05397-5;Q05397-7;B4DWJ1;E5RHD8;E5RI03;Q05397-6	2	1	8.4993	0.566427	0.246856	0.172897	1.1342	0.0778894	CF42	PF44	124994	Focal adhesion kinase 1 OS=Homo sapiens OX=9606 GN=PTK2 PE=1 SV=1	107.447	84.9564	124.654	105.686	2.02402	0.188364	3	1242	139.603	89.9209	50.0202	93.1814	1.96933	0.481645	44.8804	3	1267	0.881681	-0.181672
B1AJZ9;B1AJZ9-3;B1AJZ9-4;H0Y3C6;Q5JYW1;H0Y5P0;H0YE38;Q5JYW6;H0YCR1;H0YEU3	9	1	39.7404	0.23317	0.632328	0.0886363	1.28055	0.193013	PF44	CF42	162760	Forkhead-associated domain-containing protein 1 OS=Homo sapiens OX=9606 GN=FHAD1 PE=2 SV=2	826.387	463.881	462.915	584.394	2.76671	0.358614	3	634	836.667	719.4	688.978	748.348	2.8741	0.104208	77.9842	3	552	1.28055	0.356768
Q13642;Q13642-1;Q13642-4;Q13642-5;Q5JXI8;A0A0D9SFB0;A0A0D9SFI6;A0A0D9SFZ9;A0A0D9SG53;A0A0D9SGB2;Q13642-3;Q5JXH7;Q5JXH8;Q5JXH9;Q5JXI0;Q5JXI2;Q5JXI3;A0A0D9SGD1	4	2	20.6815	0.0169522	1.77077	0.0137759	1.76027	0.83317	CF42	PF44	38030.9	Four and a half LIM domains protein 1 OS=Homo sapiens OX=9606 GN=FHL1 PE=1 SV=4	143.226	191.185	167.861	167.424	2.22382	0.143243	3	1098	74.0195	104.645	106.674	95.1129	1.97824	0.192357	18.2956	3	1261	0.568095	-0.815795
Q14192;A0A0A0MSG2;J3KNW4	7	5	38.5975	0.201739	0.695209	0.0800074	1.16593	0.218992	PF44	CF42	34188.8	Four and a half LIM domains protein 2 OS=Homo sapiens OX=9606 GN=FHL2 PE=1 SV=3	416.702	363.187	322.153	367.347	2.56508	0.129065	3	801	428.21	478.984	377.711	428.302	2.63175	0.118226	50.6365	3	758	1.16593	0.221484
Q5SZK8;Q5SZK8-2	3	1	11.459	0.00274921	2.56079	0.00422217	1.28355	0.997039	CF42	PF44	352811	FRAS1-related extracellular matrix protein 2 OS=Homo sapiens OX=9606 GN=FREM2 PE=1 SV=2	152.718	151.968	160.827	155.171	2.19081	0.0316563	3	1127	112.965	124.435	125.275	120.892	2.0824	0.0568889	6.87741	3	1199	0.779088	-0.360142
P04075;J3KPS3;P04075-2;H3BQN4;H3BPS8;H3BUH7;H3BR04;H3BMQ8;H3BR68;H3BU78	29	17	165.49	0.00229903	2.63845	0.00389835	1.22374	0.998482	CF42	PF44	39876.3	Fructose-bisphosphate aldolase A OS=Homo sapiens OX=9606 GN=ALDOA PE=1 SV=2	7100.39	7061.93	6780.62	6980.98	3.84392	0.0250079	3	69	5520.49	5599.18	5994.17	5704.61	3.75623	0.0444962	253.833	3	94	0.817164	-0.291302
P09972;A8MVZ9;C9J8F3;J3KSV6;J3QKP5;K7EKH5;J3QKK1	12	4	55.1194	0.282028	0.549708	0.102332	1.02397	0.16193	PF44	CF42	39855.1	Fructose-bisphosphate aldolase C OS=Homo sapiens OX=9606 GN=ALDOC PE=1 SV=2	2102.15	2154.38	2017.41	2091.32	3.32042	0.0330529	3	252	2135.64	2135.47	2153.23	2141.45	3.33071	0.00476607	10.2063	3	248	1.02397	0.0341756
P07954;P07954-2	5	2	30.3464	0.00857299	2.06687	0.00864717	1.60585	0.941331	PF44	CF42	54808.2	Fumarate hydratase_ mitochondrial OS=Homo sapiens OX=9606 GN=FH PE=1 SV=3	475.571	504.418	368.823	449.604	2.65283	0.158872	3	736	727.762	684.393	753.83	721.995	2.85853	0.0485814	35.0756	3	564	1.60585	0.683334
Q9BQS8;Q9BQS8-4;Q9BQS8-2;Q9BQS8-3	12	1	46.1083	0.386448	0.412909	0.128866	2.35802	0.118104	CF42	PF44	168694	FYVE and coiled-coil domain-containing protein 1 OS=Homo sapiens OX=9606 GN=FYCO1 PE=1 SV=3	73.6693	423.012	471.535	322.739	2.50885	0.672558	3	861	139.722	110.128	160.756	136.868	2.1363	0.185831	25.4344	3	1156	0.424084	-1.23758
Q6ZVF9	2	1	7.5873	0.00485159	2.31412	0.00597016	60.4835	0.983293	CF42	PF44	83408.2	G protein-regulated inducer of neurite outgrowth 3 OS=Homo sapiens OX=9606 GN=GPRIN3 PE=2 SV=2	125.276	119.439	105.733	116.816	2.0675	0.0858797	3	1220		5.7941		5.7941	0.762986	#DIV/0!	#DIV/0!	1	1511	0.0496003	-4.33351
G3V3R6;P17931	5	2	31.4464	0.0035318	2.452	0.00479851	1.67326	0.993202	CF42	PF44	24143	Galectin OS=Homo sapiens OX=9606 GN=LGALS3 PE=1 SV=1	570.73	584.868	565.233	573.61	2.75862	0.0176585	3	643	311.242	314.515	402.676	342.811	2.53505	0.151309	51.8704	3	838	0.597637	-0.742658
P09382	25	17	148.465	0.000212977	3.67167	0.000811752	1.28455	1	PF44	CF42	15057.9	Galectin-1 OS=Homo sapiens OX=9606 GN=LGALS1 PE=1 SV=2	13982.2	14585	14874.3	14480.5	4.16078	0.0314323	3	37	18818.2	18368	18616.5	18600.9	4.26953	0.0121221	225.482	3	28	1.28455	0.361263
Q16666;Q16666-2;Q16666-3;A0A0A0MRB1;H3BM18;Q16666-6;X6RHM1	2	1	9.4432	0.0219244	1.65907	0.0162628	4.46474	0.775865	PF44	CF42	88712	Gamma-interferon-inducible protein 16 OS=Homo sapiens OX=9606 GN=IFI16 PE=1 SV=3	9.78995	4.37279	21.7761	11.9796	1.07844	0.743419	3	1508	49.5268	50.4721	60.4585	53.4858	1.72824	0.113246	6.05704	3	1377	4.46474	2.15858
Q9UKN8	3	2	8.395	0.183535	0.73628	0.0747143	1.05716	0.237036	CF42	PF44	93294.1	General transcription factor 3C polypeptide 4 OS=Homo sapiens OX=9606 GN=GTF3C4 PE=1 SV=2	581.554	529.62	586.962	566.045	2.75285	0.0559333	3	647	533.58	544.395	528.35	535.442	2.72871	0.0152826	8.18293	3	679	0.945934	-0.080188
O60763;O60763-2	9	4	44.1048	0.0154393	1.81137	0.0129876	1.36113	0.851937	CF42	PF44	108808	General vesicular transport factor p115 OS=Homo sapiens OX=9606 GN=USO1 PE=1 SV=2	522.812	613.299	625.804	587.305	2.76886	0.0956935	3	632	405.033	413.863	475.555	431.484	2.63496	0.0890455	38.4217	3	755	0.734685	-0.444803
Q3V6T2;A0A2R8Y7B1;A0A2U3TZV9;Q3V6T2-2;Q3V6T2-3;Q3V6T2-4;Q3V6T2-5;A0A2R8Y4W8;A0A2R8Y4X4;A0A2R8YG73;A0A2R8Y7D4;A0A2R8Y820;A0A2R8Y885;A0A2R8YCU9;A0A2R8YDS8;H7C2C6;A0A2R8YGU1;H0Y470;A0A2R8Y5D7;H0Y7U8;A0A2R8Y802;A0A087WXD9;A0A2R8Y4C6;A0A2R8Y4Z5;A0A2R8Y6B2;A0A2R8Y7D9;A0A2R8YG52;H0Y7K3	12	2	46.1199	0.561532	0.250625	0.171768	1.05739	0.0786377	CF42	PF44	216726	Girdin OS=Homo sapiens OX=9606 GN=CCDC88A PE=1 SV=2	359.844	381.724	382.137	374.568	2.57353	0.0340474	3	793	291.237	357.56	413.923	354.24	2.5493	0.173358	61.4105	3	819	0.945728	-0.0805029
P11413;P11413-3;P11413-2;E7EM57;E7EUI8;E9PD92	14	8	88.0574	0.000404921	3.39263	0.00123686	1.93327	1	CF42	PF44	59713.1	Glucose-6-phosphate 1-dehydrogenase OS=Homo sapiens OX=9606 GN=G6PD PE=1 SV=4	965.064	864.251	880.225	903.18	2.95577	0.0599937	3	476	422.899	478.501	500.135	467.178	2.66948	0.0852847	39.8432	3	729	0.517259	-0.951041
P06744;A0A0A0MTS2;A0A2U3TZU2;P06744-2;K7EQ48;A0A0J9YX90;A0A0J9YXP8;A0A0J9YYH3;A0A2R8Y6C7;K7EPY4;K7EP41;K7ERC6;K7ENA0;A0A0J9YXH9;A0A0J9YXM3;A0A0J9YYI8;A0A2R8YF08;K7EIL4;K7ELR7;K7ERK8	11	5	67.8966	0.0256885	1.59026	0.0182272	1.19084	0.737	CF42	PF44	63375.4	Glucose-6-phosphate isomerase OS=Homo sapiens OX=9606 GN=GPI PE=1 SV=4	2666.02	2413.22	2305.84	2461.69	3.39123	0.0751197	3	219	1964.56	2140.88	2096.15	2067.19	3.31538	0.0443395	91.6583	3	255	0.839744	-0.251978
P14314;K7ELL7;P14314-2;K7EPW7;A0A0C4DGP4;K7EJ70;K7EKX1	11	6	61.166	0.863402	0.063787	0.238833	1.00512	0.052391	PF44	CF42	60395	Glucosidase 2 subunit beta OS=Homo sapiens OX=9606 GN=PRKCSH PE=1 SV=2	1741.64	1695.83	1654.95	1697.47	3.2298	0.025548	3	304	1637.99	1766.26	1714.24	1706.16	3.23202	0.0378133	64.5157	3	306	1.00512	0.00736731
A0A0G2JLB3;A0A0G2JNZ5;P04062;P04062-2;P04062-4;A0A0G2JNZ0;P04062-5	3	2	16.0619	0.0922891	1.03485	0.0454788	1.22889	0.392186	PF44	CF42	60176.6	Glucosylceramidase OS=Homo sapiens OX=9606 GN=GBA PE=1 SV=1	323.294	319.663	372.059	338.339	2.52935	0.086478	3	847	477.057	405.146	365.135	415.779	2.61886	0.136404	56.7141	3	765	1.22889	0.29735
P00367;P00367-3;P00367-2	10	1	55.4777	0.31892	0.496319	0.112865	7.97949	0.143692	CF42	PF44	61740.1	Glutamate dehydrogenase 1_ mitochondrial OS=Homo sapiens OX=9606 GN=GLUD1 PE=1 SV=2	6.85384	180.439	299.57	162.288	2.21029	0.907032	3	1114	20.423	33.2404	7.35091	20.3381	1.30831	0.636487	12.9449	3	1479	0.125321	-2.9963
P48507;P48507-2	4	2	23.4414	0.002462	2.60871	0.00400912	1.1374	0.998024	PF44	CF42	31069.3	Glutamate--cysteine ligase regulatory subunit OS=Homo sapiens OX=9606 GN=GCLM PE=1 SV=1	575.054	586.035	578.217	579.769	2.76325	0.0097498	3	640	653.863	642.018	682.401	659.427	2.81917	0.0314802	20.7589	3	593	1.1374	0.185736
Q5RHP9	4	1	12.4482	0.0107336	1.96925	0.0101028	2.19352	0.913151	CF42	PF44	169151	Glutamate-rich protein 3 OS=Homo sapiens OX=9606 GN=ERICH3 PE=2 SV=1	84.9529	87.0551	86.7213	86.2431	1.93572	0.0130992	3	1303	52.138	27.8299	37.9838	39.3172	1.59458	0.31052	12.2088	3	1422	0.455888	-1.13325
Q06210;Q06210-2	12	11	80.1972	0.033768	1.47149	0.0222381	1.12788	0.665235	CF42	PF44	79605	Glutamine--fructose-6-phosphate aminotransferase [isomerizing] 1 OS=Homo sapiens OX=9606 GN=GFPT1 PE=1 SV=3	1317.12	1254.74	1193.36	1255.08	3.09867	0.0493018	3	384	1063.59	1159.47	1115.25	1112.77	3.04641	0.0431222	47.9851	3	417	0.886616	-0.173618
P35754	2	2	13.5118	0.0409285	1.38797	0.0253636	16.4783	0.612512	PF44	CF42	12060.9	Glutaredoxin-1 OS=Homo sapiens OX=9606 GN=GLRX PE=1 SV=2	25.9679	13.546		19.757	1.29572	0.444584	2	1493	247.119	221.864	182.14	217.041	2.33654	0.150925	32.757	3	1010	10.9855	3.45753
E7ETY7;Q8TED1	4	1	22.9131	0.00287101	2.54197	0.00429017	1.18473	0.996552	PF44	CF42	18261.1	Glutathione peroxidase OS=Homo sapiens OX=9606 GN=GPX8 PE=1 SV=1	28117.3	27249.1	29429.8	28265.4	4.45126	0.0388403	3	14	34359.4	32843.9	33257.7	33487	4.52488	0.023392	783.329	3	15	1.18473	0.244563
P00390;P00390-2;P00390-3	1	1	4.3271	0.775623	0.110349	0.220209	1.01742	0.0566187	CF42	PF44	56827.4	Glutathione reductase_ mitochondrial OS=Homo sapiens OX=9606 GN=GSR PE=1 SV=2	385.339	396.16	444.167	408.555	2.61125	0.0766407	3	758	426.544	393.559	384.571	401.558	2.60375	0.0550365	22.1003	3	781	0.982874	-0.0249219
E9PFN5;Q9Y2Q3;Q9Y2Q3-2;Q9Y2Q3-3;Q9Y2Q3-4	3	2	17.4297	0.688822	0.161893	0.201407	1.03803	0.0632364	PF44	CF42	21821.4	Glutathione S-transferase kappa OS=Homo sapiens OX=9606 GN=GSTK1 PE=1 SV=1	508.5	537.911	634.088	560.166	2.74832	0.117261	3	653	557.13	536.51	650.77	581.47	2.76453	0.104726	60.8948	3	645	1.03803	0.05385
P21266	3	2	19.5299	0.00349872	2.45609	0.00479851	1.3651	0.993397	CF42	PF44	27015.9	Glutathione S-transferase Mu 3 OS=Homo sapiens OX=9606 GN=GSTM3 PE=1 SV=3	747.917	658.493	776.121	727.51	2.86184	0.0844142	3	549	534.059	527.832	536.914	532.935	2.72667	0.00871373	4.64385	3	680	0.732546	-0.449009
P78417;P78417-2;P78417-3;Q5TA02;Q5TA01	7	5	44.8346	0.238735	0.622084	0.0901947	1.0603	0.18897	PF44	CF42	27851	Glutathione S-transferase omega-1 OS=Homo sapiens OX=9606 GN=GSTO1 PE=1 SV=2	969.033	998.637	898.871	955.514	2.98024	0.0536245	3	455	1059.33	1020	960.059	1013.13	3.00567	0.0493451	49.9931	3	452	1.0603	0.0844737
P09211;A8MX94;A0A087X2E9;A0A087X243;A0A2R8Y5E5	9	5	86.4186	9.25809e-05	4.03348	0.000511207	1.51597	1	PF44	CF42	23584	Glutathione S-transferase P OS=Homo sapiens OX=9606 GN=GSTP1 PE=1 SV=2	4905.77	4573.76	4902.11	4793.88	3.68069	0.0397671	3	103	7298.68	7403.2	7100.3	7267.39	3.86138	0.0211706	153.855	3	76	1.51597	0.600243
A0A2R8Y430;P48637;P48637-2;A0A2R8Y5T7;A0A2R8Y6Q7;A0A0S2Z4J7;A0A2R8Y2F2;A0A2R8Y2X9;A0A2R8Y446;A0A2R8Y4V9;A0A2R8Y6Y6;A0A2R8Y790;A0A2R8YF34	7	1	30.8402	0.0807582	1.09281	0.0413581	1.11846	0.426549	PF44	CF42	50148.2	Glutathione synthetase OS=Homo sapiens OX=9606 GN=GSS PE=1 SV=1	4529.32	4451.16	4213.52	4398	3.64326	0.0373972	3	116	5240.67	4980.83	4535.41	4918.97	3.69187	0.0725107	356.678	3	112	1.11846	0.161509
P04406;P04406-2;E7EUT5	47	31	238.707	0.000348554	3.45773	0.00109713	1.22652	1	CF42	PF44	36224.4	Glyceraldehyde-3-phosphate dehydrogenase OS=Homo sapiens OX=9606 GN=GAPDH PE=1 SV=3	51487	50917.9	52957.8	51787.5	4.71423	0.0203257	3	6	42250.2	41203.6	43215.3	42223	4.62555	0.0238295	1006.15	3	11	0.815312	-0.294575
P43304;P43304-2;F5GYK7	7	3	31.1424	0.00348863	2.45734	0.00479851	1.28223	0.993456	PF44	CF42	81366.1	Glycerol-3-phosphate dehydrogenase_ mitochondrial OS=Homo sapiens OX=9606 GN=GPD2 PE=1 SV=3	2021.64	2031.62	2055.16	2036.14	3.30881	0.00845281	3	256	2788.19	2614.04	2430.19	2610.8	3.41677	0.0685701	179.023	3	206	1.28223	0.358657
A0A1W2PQV2;H3BUH9;P23434	1	1	5.4578	0.230257	0.637788	0.0880731	3.3747	0.195189	PF44	CF42	11113.3	Glycine cleavage system H protein_ mitochondrial (Fragment) OS=Homo sapiens OX=9606 GN=GCSH PE=1 SV=1	22.1852		56.6187	39.4019	1.59552	0.617943	2	1434	30.0534	90.628	145.258	88.6465	1.94766	0.650087	57.6279	3	1278	2.2498	1.1698
P41250	12	8	83.6607	0.0730861	1.13617	0.0386705	1.21588	0.452933	PF44	CF42	83907.1	Glycine--tRNA ligase OS=Homo sapiens OX=9606 GN=GARS PE=1 SV=3	1741.1	2312.2	1946.19	1999.83	3.30099	0.144664	3	260	2364.73	2464.5	2465.46	2431.56	3.38589	0.0238033	57.8793	3	226	1.21588	0.282004
P46976;P46976-2	1	1	3.368	0.0229245	1.6397	0.016663	1.70762	0.765168	PF44	CF42	39726	Glycogenin-1 OS=Homo sapiens OX=9606 GN=GYG1 PE=1 SV=4	216.976	130.214	153.632	166.941	2.22256	0.268874	3	1100	306.655	272.02	276.539	285.071	2.45495	0.0660451	18.8276	3	912	1.70762	0.771989
P30419;P30419-2;B7Z8J4;K7EN82	2	1	11.5318	0.0850855	1.07014	0.0429612	1.33452	0.412977	CF42	PF44	57148.5	Glycylpeptide N-tetradecanoyltransferase 1 OS=Homo sapiens OX=9606 GN=NMT1 PE=1 SV=2	225.188	249.218	284.663	253.023	2.40316	0.118248	3	953	152.088	222.004	194.704	189.599	2.27784	0.185846	35.2361	3	1059	0.749333	-0.416321
F6TLX2;I3L1I0;Q9HC38;Q9HC38-2	1	1	5.7041	0.000448641	3.3481	0.0013326	7.95509	1	CF42	PF44	55575.1	Glyoxalase domain-containing protein 4 OS=Homo sapiens OX=9606 GN=GLOD4 PE=1 SV=1	142.812	187.01	164.356	164.726	2.21676	0.134169	3	1107	26.1554	21.8203	14.1451	20.707	1.31612	0.29372	6.08205	3	1477	0.125706	-2.99188
Q9UBQ7;U3KQ56	3	2	16.653	0.0128881	1.88981	0.0115163	1.42825	0.884752	CF42	PF44	36067.5	Glyoxylate reductase/hydroxypyruvate reductase OS=Homo sapiens OX=9606 GN=GRHPR PE=1 SV=1	487.343	435.603	391.341	438.096	2.64157	0.109678	3	741	277.46	308.69	334.058	306.736	2.48676	0.0924235	28.3496	3	885	0.700158	-0.514248
Q92896;Q92896-2;Q92896-3;H3BM42;H3BQU9;H3BQT1	8	4	38.6621	0.492215	0.307846	0.155535	1.08695	0.090961	CF42	PF44	138430	Golgi apparatus protein 1 OS=Homo sapiens OX=9606 GN=GLG1 PE=1 SV=2	390.125	293.491	393.556	359.057	2.55516	0.158214	3	816	344.076	316.709	330.223	330.336	2.51896	0.0414228	13.6834	3	848	0.920009	-0.12028
Q9H8Y8;Q9H8Y8-2;Q9H8Y8-3	3	2	17.3689	0.676064	0.170012	0.198373	1.06227	0.0644444	PF44	CF42	47316.5	Golgi reassembly-stacking protein 2 OS=Homo sapiens OX=9606 GN=GORASP2 PE=1 SV=3	133.259	251.412	261.407	215.359	2.33316	0.330967	3	1009	206.017	232.002	248.29	228.77	2.3594	0.0931997	21.3213	3	992	1.06227	0.0871503
Q9H3P7	7	1	33.6652	0.179425	0.746118	0.0734575	1.09667	0.241484	PF44	CF42	60878.6	Golgi resident protein GCP60 OS=Homo sapiens OX=9606 GN=ACBD3 PE=1 SV=4	634.962	551.195	620.94	602.366	2.77986	0.0744839	3	621	621.784	654.804	705.207	660.598	2.81994	0.0635977	42.0126	3	591	1.09667	0.133134
Q08378;Q08378-2;Q08378-4	6	1	23.7535	0.854847	0.0681115	0.237179	1.15074	0.052705	PF44	CF42	167868	Golgin subfamily A member 3 OS=Homo sapiens OX=9606 GN=GOLGA3 PE=1 SV=2	68.4696	63.6681	43.8379	58.6585	1.76833	0.222605	3	1378	32.4267	85.1655	84.9101	67.5007	1.82931	0.45	30.3753	3	1342	1.15074	0.202562
H0Y6I0;Q13439;Q13439-3;Q13439-4;Q13439-5;A0A087WTW2;E7EVX2	23	2	92.8219	0.00231441	2.63556	0.0039038	2.74418	0.998442	CF42	PF44	247520	Golgin subfamily A member 4 (Fragment) OS=Homo sapiens OX=9606 GN=GOLGA4 PE=1 SV=1	168.964	163.579	202.75	178.431	2.25147	0.118994	3	1077	49.1569	74.5802	71.328	65.0217	1.81306	0.212778	13.8352	3	1347	0.364408	-1.45638
Q14789;Q14789-2;Q14789-3;Q14789-4;E7EU81;H0Y867	36	5	148.033	0.0935772	1.02883	0.0458512	10.5285	0.388684	PF44	CF42	377445	Golgin subfamily B member 1 OS=Homo sapiens OX=9606 GN=GOLGB1 PE=1 SV=2	61.4685	58.8002		60.1344	1.77912	0.0313761	2	1371	455.244	294.747	516.262	422.084	2.6254	0.271083	114.42	3	761	7.01902	2.81127
Q92538;Q92538-2;Q92538-3	5	1	17.485	0.194064	0.712056	0.0777599	1.75222	0.226291	PF44	CF42	208499	Golgi-specific brefeldin A-resistance guanine nucleotide exchange factor 1 OS=Homo sapiens OX=9606 GN=GBF1 PE=1 SV=2	44.9745	56.5655	26.3185	42.6195	1.62961	0.358062	3	1429	80.7644	101.444	41.8288	74.6789	1.8732	0.405331	30.2697	3	1314	1.75222	0.809186
Q3T8J9;Q3T8J9-3;A0A087WUE6;A4PB68;Q3T8J9-2	10	1	44.6276	0.0289828	1.53786	0.0199773	1.92784	0.705951	PF44	CF42	250617	GON-4-like protein OS=Homo sapiens OX=9606 GN=GON4L PE=1 SV=1	126.04	66.5229	85.1985	92.5873	1.96655	0.328759	3	1284	149.085	195.178	191.217	178.493	2.25162	0.143115	25.545	3	1074	1.92784	0.946985
K7EKL3;K7EQ05;P28799;P28799-3;K7EQI0;P28799-2	2	1	7.9314	0.00515869	2.28746	0.00622664	11.4598	0.980473	PF44	CF42	44318.2	Granulins (Fragment) OS=Homo sapiens OX=9606 GN=GRN PE=1 SV=1	2.94567	12.1624	9.44503	8.18436	0.912985	0.578655	3	1514	104.408	112.141	64.8251	93.7913	1.97216	0.270619	25.3817	3	1263	11.4598	3.51851
Q9H706;Q9H706-2;Q9H706-3	3	2	11.3754	0.690011	0.161144	0.201617	1.96096	0.0631271	CF42	PF44	98611.9	GRB2-associated and regulator of MAPK protein 1 OS=Homo sapiens OX=9606 GN=GAREM1 PE=1 SV=2	152.63		10.0048	81.3174	1.91018	1.24022	2	1319	34.0151	43.8613	5.05976	27.6454	1.44162	0.729589	20.1698	3	1456	0.339969	-1.55653
O60565;O60565-2;Q9H772	3	3	17.0017	0.00538295	2.26898	0.00636925	1.32294	0.978312	CF42	PF44	21210	Gremlin-1 OS=Homo sapiens OX=9606 GN=GREM1 PE=1 SV=1	441.544	436.434	402.243	426.741	2.63016	0.0500743	3	747	307.379	350.129	310.202	322.57	2.50862	0.0741184	23.9084	3	860	0.755892	-0.403748
Q8IWJ2;B8ZZW2	11	1	38.8939	0.819402	0.0865031	0.230511	1.04478	0.0542265	CF42	PF44	196993	GRIP and coiled-coil domain-containing protein 2 OS=Homo sapiens OX=9606 GN=GCC2 PE=1 SV=4	87.3958	119.478	72.7878	93.2206	1.96951	0.256209	3	1283	114.433	58.6988	94.5449	89.2255	1.95049	0.31656	28.2452	3	1276	0.957143	-0.0631934
A0A075B793;A0A087WT45;Q4V328;Q4V328-4;Q4V328-2;A0A087WZF5;A0A087WXA6;Q4V328-3	6	1	26.4717	0.172444	0.763353	0.0716898	1.91427	0.249391	PF44	CF42	93096.3	GRIP1-associated protein 1 OS=Homo sapiens OX=9606 GN=GRIPAP1 PE=1 SV=2	35.453	50.7027	25.88	37.3452	1.57223	0.335225	3	1440	73.5726	36.8174	104.076	71.4886	1.85424	0.471091	33.6776	3	1326	1.91427	0.936791
Q5VVW2;A0A0C4DFW0;Q5VVW2-2;Q5VVW2-5;Q5VVW2-3	4	1	28.8313	0.526428	0.278661	0.163232	1.81645	0.0844525	CF42	PF44	113879	GTPase-activating Rap/Ran-GAP domain-like protein 3 OS=Homo sapiens OX=9606 GN=GARNL3 PE=2 SV=2	793.804	717.814		755.809	2.87841	0.0710943	2	537	832.184			832.184	2.92022	#DIV/0!	#DIV/0!	1	513	1.10105	0.13888
P62826;B5MDF5;J3KQE5;F5H018;B4DV51;H0YFC6	10	9	55.0433	0.13017	0.88549	0.0579168	1.08841	0.30955	CF42	PF44	24594.2	GTP-binding nuclear protein Ran OS=Homo sapiens OX=9606 GN=RAN PE=1 SV=3	2457.74	2129.45	2272.7	2286.63	3.3592	0.0719775	3	231	2090.1	2156.89	2055.65	2100.88	3.3224	0.0245001	51.4718	3	252	0.918768	-0.122228
Q9NR31;H0Y5E8;Q9NR31-2;D6RAA2;D6RD69;D6RDB2;Q5SQT8;Q9Y6B6;X1WI22	6	3	34.5823	0.0204126	1.6901	0.0156992	1.16722	0.792559	CF42	PF44	22480.9	GTP-binding protein SAR1a OS=Homo sapiens OX=9606 GN=SAR1A PE=1 SV=1	963.513	967.107	865.841	932.153	2.96949	0.0616387	3	462	786.756	778.991	830.077	798.608	2.90233	0.0344703	27.5283	3	527	0.856735	-0.22308
P52735;P52735-2;P52735-3	5	1	22.8983	0.0319058	1.49613	0.0215283	1.39983	0.680503	CF42	PF44	102544	Guanine nucleotide exchange factor VAV2 OS=Homo sapiens OX=9606 GN=VAV2 PE=1 SV=2	485.134	568.548	593.076	548.919	2.73951	0.103085	3	662	448.397	394.341	333.664	392.134	2.59343	0.146375	57.3987	3	787	0.714375	-0.485247
P04899;P04899-4;P04899-2;P04899-3;P04899-5;P04899-6;P63096;A0A087WTB6;A0A087WZE5;A0A1W2PQK2;A0A1W2PRE1;A0A1W2PRJ7;A0A1W2PS82;A2A2R6;A8MTJ3;H0Y7E8;H0Y7F4;P09471;P09471-2;P11488;P19087;P38405;P38405-2;P63096-2;Q14344;Q5JWD1;Q5JWE9	8	5	61.7736	0.0507588	1.29449	0.0295915	1.1558	0.552688	PF44	CF42	41021.3	Guanine nucleotide-binding protein G(i) subunit alpha-2 OS=Homo sapiens OX=9606 GN=GNAI2 PE=1 SV=3	1105.47	1072.4	1021.32	1066.4	3.02792	0.0397548	3	432	1282.16	1294.45	1121.02	1232.54	3.0908	0.0785185	96.7773	3	385	1.1558	0.208891
Q9UBI6	2	2	13.2966	0.0951603	1.02154	0.0465275	1.35957	0.384463	PF44	CF42	8120.29	Guanine nucleotide-binding protein G(I)/G(S)/G(O) subunit gamma-12 OS=Homo sapiens OX=9606 GN=GNG12 PE=1 SV=3	121.548	101.119	106.034	109.567	2.03968	0.097317	3	1233	153.843	176.963	116.085	148.964	2.17308	0.206296	30.7307	3	1125	1.35957	0.443148
P62873;P62873-2;F6UT28;B1AKQ8;B3KVK2;F6X3N5;C9JZN1;H7C5J5;Q9HAV0	7	3	48.6326	0.720024	0.142653	0.208408	1.01786	0.0605483	CF42	PF44	38175.4	Guanine nucleotide-binding protein G(I)/G(S)/G(T) subunit beta-1 OS=Homo sapiens OX=9606 GN=GNB1 PE=1 SV=3	588.263	602.88	558.818	583.32	2.76591	0.0384748	3	637	530.372	569.954	618.928	573.085	2.75822	0.0774077	44.3611	3	652	0.982453	-0.0255393
E7EP32;P62879;C9JIS1;C9JXA5;P62879-2	4	1	27.2307	0.252497	0.597744	0.0942365	1.05993	0.179579	CF42	PF44	33092.9	Guanine nucleotide-binding protein G(I)/G(S)/G(T) subunit beta-2 OS=Homo sapiens OX=9606 GN=GNB2 PE=1 SV=1	585.378	545.099	529.324	553.267	2.74293	0.0522459	3	657	496.511	515.935	553.51	521.985	2.71766	0.0555135	28.9772	3	695	0.94346	-0.0839674
P32455	4	1	18.0188	0.000128315	3.89172	0.000563925	5.56146	1	CF42	PF44	68444.1	Guanylate-binding protein 1 OS=Homo sapiens OX=9606 GN=GBP1 PE=1 SV=2	188.739	193.925	151.108	177.924	2.25023	0.131336	3	1079	33.7329	35.504	26.7401	31.9923	1.50505	0.144847	4.63398	3	1446	0.179809	-2.47546
F6QDS0;H3BQK0;I3L0H8;Q9NUU7;Q9UMR2;Q9UMR2-2;Q9UMR2-4;I3L352;Q9NUU7-2;Q9UMR2-3;H3BMQ5;H3BN59;H3BTB3	3	1	14.4435	0.778459	0.108764	0.220723	1.03061	0.0564457	CF42	PF44	54474.3	HCG2043426_ isoform CRA_b OS=Homo sapiens OX=9606 GN=hCG_2043426 PE=1 SV=1	194.583	263.54	197.103	218.409	2.33927	0.179045	3	1006	114.127	268.054	253.582	211.921	2.32617	0.401097	85.001	3	1018	0.970297	-0.0435016
Q86XA9;F5H619;H0YIW3;H7C5W6;Q86XA9-2	2	1	3.4268	0.119191	0.923755	0.0544381	1.28993	0.329826	PF44	CF42	225312	HEAT repeat-containing protein 5A OS=Homo sapiens OX=9606 GN=HEATR5A PE=1 SV=2	231.685	277.688	275.387	261.587	2.41762	0.0990925	3	940	389.785	352.607	269.893	337.429	2.52818	0.181877	61.3704	3	840	1.28993	0.367293
P0DMV8;A0A0G2JIW1;P0DMV8-2;P0DMV9;V9GZ37;P48741	19	5	109.38	0.108364	0.965114	0.0511753	1.10453	0.352458	CF42	PF44	70337.5	Heat shock 70 kDa protein 1A OS=Homo sapiens OX=9606 GN=HSPA1A PE=1 SV=1	936.311	973.216	993.662	967.73	2.98575	0.0300358	3	453	801.223	936.146	891.074	876.148	2.94258	0.0783984	68.6886	3	503	0.905364	-0.14343
P34932;A0A087WYC1;A0A087WTS8;P34932-2	15	10	104.497	0.013872	1.85786	0.0120699	1.13561	0.871948	CF42	PF44	95186.5	Heat shock 70 kDa protein 4 OS=Homo sapiens OX=9606 GN=HSPA4 PE=1 SV=4	1509.73	1490.9	1596.41	1532.35	3.18536	0.0367241	3	323	1290.75	1379.68	1377.65	1349.36	3.13013	0.0376247	50.7693	3	359	0.880583	-0.183469
P11142;E9PKE3;P11142-2;E9PNE6;E9PN89;E9PLF4;E9PK54;E9PQK7;E9PQQ4;E9PPY6;E9PN25;E9PI65;E9PS65;E9PM13	46	18	336.431	0.0025693	2.59018	0.00403863	1.19522	0.997683	PF44	CF42	71126.3	Heat shock cognate 71 kDa protein OS=Homo sapiens OX=9606 GN=HSPA8 PE=1 SV=1	13035.1	12303.9	12100.8	12479.9	4.09621	0.0393767	3	43	15287.1	14554.4	14907.1	14916.2	4.17366	0.0245676	366.455	3	38	1.19522	0.257271
Q92598;Q92598-2;Q92598-3;Q92598-4;A0A0A0MSM0;R4GN69	10	5	65.3256	0.0100485	1.9979	0.00974529	1.26549	0.922181	CF42	PF44	97777.6	Heat shock protein 105 kDa OS=Homo sapiens OX=9606 GN=HSPH1 PE=1 SV=1	607.407	694.787	617.978	640.058	2.80622	0.0745106	3	598	533.748	499.001	484.582	505.777	2.70396	0.0499701	25.2737	3	708	0.790206	-0.3397
P04792;F8WE04;C9J3N8	8	8	61.6633	0.0161043	1.79306	0.0133129	1.30317	0.843617	PF44	CF42	22839.6	Heat shock protein beta-1 OS=Homo sapiens OX=9606 GN=HSPB1 PE=1 SV=2	5241.92	4921.96	4182.95	4782.27	3.67963	0.113571	3	104	6208.39	6261.33	6226.67	6232.13	3.79464	0.00431488	26.8909	3	87	1.30317	0.382029
P07900;P07900-2;G3V2J8;Q14568;Q58FG0;Q58FG1	34	16	280.735	0.453492	0.34343	0.145109	1.03642	0.0995107	CF42	PF44	85059.1	Heat shock protein HSP 90-alpha OS=Homo sapiens OX=9606 GN=HSP90AA1 PE=1 SV=5	5273.43	5493.73	4987.41	5251.52	3.72029	0.0483426	3	94	5252.67	5212.01	4736.33	5067	3.70475	0.0566593	287.093	3	110	0.964864	-0.0516029
P08238;Q58FF7;Q58FF6	51	21	351.54	0.00246675	2.60787	0.00400912	1.1795	0.99801	PF44	CF42	83606.5	Heat shock protein HSP 90-beta OS=Homo sapiens OX=9606 GN=HSP90AB1 PE=1 SV=4	9104.36	8783.7	8839.65	8909.24	3.94984	0.0192252	3	58	10736.6	10730	10058.9	10508.5	4.02154	0.0370565	389.408	3	56	1.1795	0.238181
P54652	15	4	110.995	3.03826e-05	4.51737	0.000232413	1.75811	1	CF42	PF44	70306.2	Heat shock-related 70 kDa protein 2 OS=Homo sapiens OX=9606 GN=HSPA2 PE=1 SV=1	1238.22	1198.67	1193.69	1210.19	3.08285	0.0201629	3	393	722.138	672.292	670.614	688.348	2.83781	0.0425293	29.2749	3	582	0.568792	-0.814027
P25092	3	1	11.0357	0.173017	0.761911	0.0718588	1.20246	0.248724	CF42	PF44	124430	Heat-stable enterotoxin receptor OS=Homo sapiens OX=9606 GN=GUCY2C PE=1 SV=2	794.481	705.689	760.298	753.489	2.87708	0.0594375	3	538	752.85	618.274	508.746	626.623	2.79701	0.195119	122.266	3	617	0.831629	-0.265989
Q6ZRS2;A0A0A0MS59;A0A0C4DFX4;Q6ZRS2-2;Q6ZRS2-3	15	3	65.6915	0.00238005	2.62341	0.00395781	3.07892	0.998263	CF42	PF44	345209	Helicase SRCAP OS=Homo sapiens OX=9606 GN=SRCAP PE=1 SV=3	633.777	782.806	960.409	792.331	2.89891	0.206383	3	520	215.347	242.293	314.38	257.34	2.41051	0.198969	51.2028	3	946	0.324789	-1.62243
Q9BYK8;Q9BYK8-2;Q9BYK8-4	14	2	51.4097	0.0186891	1.72841	0.0147965	1.29232	0.812371	PF44	CF42	298472	Helicase with zinc finger domain 2 OS=Homo sapiens OX=9606 GN=HELZ2 PE=1 SV=6	284.34	286.96	339.688	303.663	2.48239	0.102833	3	885	371.797	418.807	386.686	392.43	2.59376	0.0612233	24.0259	3	786	1.29232	0.369966
A0A0C4DGA6;Q14527;Q14527-2;H7C5K0	8	1	31.9283	0.0302424	1.51938	0.0206422	1.49484	0.694754	CF42	PF44	114884	Helicase-like transcription factor OS=Homo sapiens OX=9606 GN=HLTF PE=1 SV=1	715.33	702.629	792.898	736.952	2.86744	0.0663064	3	546	566.245	383.468	529.282	492.998	2.69285	0.196024	96.6397	3	716	0.668969	-0.579989
P09601;B1AHA8	9	3	56.6416	0.00144468	2.84023	0.00281546	1.4682	0.999809	PF44	CF42	32818.7	Heme oxygenase 1 OS=Homo sapiens OX=9606 GN=HMOX1 PE=1 SV=1	393.158	337.63	356.679	362.489	2.55929	0.0778397	3	810	539.037	510.329	547.258	532.208	2.72608	0.03643	19.3883	3	682	1.4682	0.554053
Q8NDA2;Q8NDA2-2;Q8NDA2-4;A0A087WZ11;H0Y3X1;Q6P158-2;Q6P158-3	29	1	124.404	0.0193245	1.71389	0.0151602	1.12613	0.80497	PF44	CF42	549563	Hemicentin-2 OS=Homo sapiens OX=9606 GN=HMCN2 PE=2 SV=3	6504.24	6379.54	6882.59	6588.79	3.81881	0.0397595	3	77	7104.54	7607.37	7547.58	7419.83	3.87039	0.0370198	274.681	3	73	1.12613	0.171372
A0A2R8Y7C0;P69905;G3V1N2	2	1	11.9208	0.000757912	3.12038	0.00185471	14.0876	0.999996	PF44	CF42	13842.7	Hemoglobin subunit alpha (Fragment) OS=Homo sapiens OX=9606 GN=HBA2 PE=1 SV=1	13.4297	22.1427	37.0069	24.1931	1.38369	0.492767	3	1480	346.818	316.541	359.11	340.823	2.53253	0.0642812	21.9085	3	839	14.0876	3.81636
O14964;O14964-2;I3L1P5	4	2	21.6758	0.361243	0.442201	0.123907	1.06014	0.126686	CF42	PF44	86762.5	Hepatocyte growth factor-regulated tyrosine kinase substrate OS=Homo sapiens OX=9606 GN=HGS PE=1 SV=1	506.89	512.054	565.094	528.012	2.72264	0.0610154	3	675	500.233	536.353	457.589	498.058	2.69728	0.0791612	39.4269	3	712	0.94327	-0.0842573
D6R9P3;D6RBZ0;D6RD18;Q99729-2;Q99729-3;Q99729;Q99729-4	6	2	39.5571	0.0213794	1.67	0.0160698	1.20512	0.781809	PF44	CF42	30416.9	Heterogeneous nuclear ribonucleoprotein A/B OS=Homo sapiens OX=9606 GN=HNRNPAB PE=1 SV=1	344.661	289.065	323.517	319.081	2.5039	0.0879467	3	864	385.708	382.038	385.852	384.532	2.58493	0.00562056	2.16129	3	796	1.20512	0.269183
F8W6I7;P09651;P09651-2;P09651-3;F8VTQ5;H0YH80;A0A2R8Y4L2;F8VZ49;F8W646	5	2	49.3716	0.0428004	1.36855	0.0262966	1.17576	0.600112	PF44	CF42	33269.3	Heterogeneous nuclear ribonucleoprotein A1 OS=Homo sapiens OX=9606 GN=HNRNPA1 PE=1 SV=2	1584.25	1714.44	1639.09	1645.93	3.21641	0.039712	3	310	1781.89	1910.13	2113.65	1935.22	3.28673	0.0864471	167.294	3	272	1.17576	0.233599
P51991;P51991-2;H7C1J8	5	5	33.689	6.67754e-05	4.17538	0.000422939	1.4583	1	PF44	CF42	39823.1	Heterogeneous nuclear ribonucleoprotein A3 OS=Homo sapiens OX=9606 GN=HNRNPA3 PE=1 SV=2	603.515	613.05	638.036	618.2	2.79113	0.0288374	3	608	880.415	899.02	925.126	901.52	2.95498	0.0249138	22.4603	3	489	1.4583	0.544285
D6RAF8;D6RF44;H0Y8G5;H0YA96;Q14103;Q14103-2;Q14103-3;Q14103-4;D6RBQ9;D6RD83	3	2	23.548	0.0121112	1.91681	0.0109585	1.23116	0.894957	CF42	PF44	23133.6	Heterogeneous nuclear ribonucleoprotein D0 (Fragment) OS=Homo sapiens OX=9606 GN=HNRNPD PE=1 SV=1	1831.53	1705.28	1893.87	1810.23	3.25773	0.053077	3	285	1493.38	1548.41	1369.22	1470.34	3.16742	0.0624295	91.7924	3	332	0.81224	-0.300023
A0A087WUK2;O14979;O14979-2;O14979-3	7	2	39.2474	0.0678852	1.16822	0.0365016	2.92786	0.472764	CF42	PF44	40211.3	Heterogeneous nuclear ribonucleoprotein D-like_ isoform CRA_b OS=Homo sapiens OX=9606 GN=HNRNPDL PE=1 SV=1	42.2708	69.3992	62.3428	58.0043	1.76346	0.242654	3	1380	17.7555	6.53936	35.1385	19.8111	1.29691	0.727368	14.41	3	1481	0.341546	-1.54985
P52597;A0A1B0GW42	5	2	33.5318	0.104213	0.982079	0.0495955	1.11908	0.361948	PF44	CF42	46014.1	Heterogeneous nuclear ribonucleoprotein F OS=Homo sapiens OX=9606 GN=HNRNPF PE=1 SV=3	1095.5	947.216	942.569	995.094	2.99786	0.0874116	3	444	1110.15	1160.54	1070.09	1113.59	3.04673	0.0406991	45.3222	3	415	1.11908	0.162315
E9PCY7;G8JLB6;P31943;D6RBM0;D6RIT2;D6RIU0;E5RGV0;H0YB39;D6R9T0;D6RAM1;D6RDU3;D6RFM3;D6RIH9;D6RJ04;E5RGH4;E7EQJ0;E7EN40;H0YAQ2;H0YBD7;H0YBG7;A0A0A6YY98;D6R9D3;D6RDL0;D6RF17;H7C2J6;Q9NQA5	9	3	70.0325	0.213948	0.669691	0.0836175	1.05956	0.208208	CF42	PF44	47372.4	Heterogeneous nuclear ribonucleoprotein H OS=Homo sapiens OX=9606 GN=HNRNPH1 PE=1 SV=1	2132.71	1891.8	1963.57	1996.02	3.30017	0.0619679	3	261	1845.43	1939.63	1866.42	1883.83	3.27504	0.026251	49.4524	3	285	0.943789	-0.083464
P55795	7	2	53.4806	0.0183626	1.73607	0.0146716	1.26322	0.816217	PF44	CF42	49548.8	Heterogeneous nuclear ribonucleoprotein H2 OS=Homo sapiens OX=9606 GN=HNRNPH2 PE=1 SV=1	623.353	662.604	720.69	668.883	2.82535	0.0732134	3	577	777.714	903.887	853.241	844.947	2.92683	0.0751459	63.4944	3	508	1.26322	0.337109
P31942;P31942-3;P31942-2;P31942-4;P31942-5;P31942-6	3	2	17.7058	0.00811539	2.09069	0.00848364	1.33652	0.947118	PF44	CF42	36983.6	Heterogeneous nuclear ribonucleoprotein H3 OS=Homo sapiens OX=9606 GN=HNRNPH3 PE=1 SV=2	689.625	756.709	632.527	692.954	2.8407	0.0896999	3	561	959.493	946.684	872.267	926.148	2.96668	0.0508559	47.1001	3	482	1.33652	0.418484
P61978;Q5T6W2;S4R359;S4R457	20	4	120.069	0.729756	0.136822	0.210658	1.00601	0.0597836	CF42	PF44	51261.5	Heterogeneous nuclear ribonucleoprotein K OS=Homo sapiens OX=9606 GN=HNRNPK PE=1 SV=1	2124.6	2051.47	2141.08	2105.72	3.3234	0.0226525	3	251	2118.87	2103.82	2056.71	2093.13	3.3208	0.0154939	32.4309	3	253	0.994024	-0.00864673
M0QXS5;P14866;P14866-2;B4DVF8;M0R076;M0R1W6	5	3	32.4584	0.036313	1.43994	0.0232736	1.32813	0.645462	PF44	CF42	59218	Heterogeneous nuclear ribonucleoprotein L (Fragment) OS=Homo sapiens OX=9606 GN=HNRNPL PE=1 SV=1	550.755	587.473	742.467	626.898	2.7972	0.162315	3	603	854.48	791.449	851.879	832.603	2.92044	0.0428344	35.664	3	512	1.32813	0.409397
A0A087X0X3;P52272;P52272-2;M0QZM1;M0R019;M0R2T0;M0QYQ7;M0R0N3;M0R2I7;M0QYL3;M0QY96;M0R0Y6	17	9	114.949	0.11503	0.939187	0.0535021	1.05669	0.338186	PF44	CF42	77798.1	Heterogeneous nuclear ribonucleoprotein M OS=Homo sapiens OX=9606 GN=HNRNPM PE=1 SV=1	1568.93	1668.79	1615.71	1617.81	3.20893	0.0308812	3	312	1757.86	1640.81	1729.9	1709.52	3.23288	0.0357554	61.1247	3	305	1.05669	0.0795526
O60506;O60506-3;O60506-2;O60506-4;B7Z645;O60506-5;F6UXX1	14	4	91.5014	0.676143	0.169962	0.198373	1.14024	0.0644368	CF42	PF44	69830.8	Heterogeneous nuclear ribonucleoprotein Q OS=Homo sapiens OX=9606 GN=SYNCRIP PE=1 SV=2	1287.07	2313.13	2442.04	2014.08	3.30408	0.314239	3	259	1755.71	1879.79	1663.6	1766.37	3.24708	0.0614182	108.487	3	298	0.877009	-0.189336
O43390;O43390-2;O43390-3;O43390-4;B4DT28	14	4	95.4899	0.000830657	3.08058	0.00198013	1.41746	0.999993	CF42	PF44	71228.3	Heterogeneous nuclear ribonucleoprotein R OS=Homo sapiens OX=9606 GN=HNRNPR PE=1 SV=1	780.374	741.523	735.433	752.443	2.87647	0.0324003	3	540	499.475	531.239	561.799	530.838	2.72496	0.058707	31.1639	3	686	0.705485	-0.503312
A0A1W2PPS1;Q00839;Q00839-2;A0A1W2PP35;A0A1X7SBS1;Q5RI18;A0A1W2PP34;A0A1W2PPH7;A0A1W2PPL4;A0A1W2PQL0;A0A1W2PQ74;A0A1W2PRZ7;A0A1W2PQD4;A0A1W2PP22	12	8	86.2281	0.823314	0.0844343	0.231309	1.02686	0.0540408	CF42	PF44	89116.6	Heterogeneous nuclear ribonucleoprotein U OS=Homo sapiens OX=9606 GN=HNRNPU PE=1 SV=1	3170.36	4030.15	4101.53	3767.35	3.57604	0.137561	3	149	3651.27	3658.46	3696.65	3668.79	3.56452	0.00664864	24.3925	3	144	0.97384	-0.0382428
Q1KMD3;H3BQZ7	8	3	45.1593	0.443582	0.353026	0.142923	1.02635	0.10193	PF44	CF42	85675.1	Heterogeneous nuclear ribonucleoprotein U-like protein 2 OS=Homo sapiens OX=9606 GN=HNRNPUL2 PE=1 SV=1	1116.24	1014.88	1036.8	1055.97	3.02365	0.0505042	3	433	1058.35	1088.73	1104.32	1083.8	3.03495	0.0215717	23.3794	3	426	1.02635	0.0375236
P22626;P22626-2;A0A087WUI2	8	4	52.9451	0.0539054	1.26837	0.0309145	1.17733	0.535993	PF44	CF42	37486.8	Heterogeneous nuclear ribonucleoproteins A2/B1 OS=Homo sapiens OX=9606 GN=HNRNPA2B1 PE=1 SV=2	4783.34	4312.75	4290.36	4462.15	3.64954	0.0623874	3	112	4881.41	5130.11	5748.68	5253.4	3.72044	0.0850098	446.59	3	103	1.17733	0.235513
B2R5W2;G3V2Q1;G3V4C1;P07910;P07910-2;P07910-4;B4DY08;G3V4W0;G3V576;B4DSU6;G3V251;G3V3K6;G3V555;G3V575;G3V5X6;G3V4M8;P07910-3;G3V2H6;G3V2D6;G3V5V7	10	2	70.5287	0.26598	0.575152	0.0980788	1.03709	0.171132	CF42	PF44	32005.3	Heterogeneous nuclear ribonucleoproteins C1/C2 OS=Homo sapiens OX=9606 GN=HNRNPC PE=1 SV=1	2667.76	2466.87	2675.45	2603.36	3.41553	0.0454275	3	203	2495.42	2486.46	2548.91	2510.26	3.39972	0.0134516	33.767	3	218	0.964239	-0.052537
P19367;P19367-2;P19367-3;P19367-4;B1AR63;P52790	7	2	39.8057	0.0271012	1.56701	0.0189486	2.19533	0.723362	CF42	PF44	103627	Hexokinase-1 OS=Homo sapiens OX=9606 GN=HK1 PE=1 SV=3	103.436	120.027	147.721	123.728	2.09247	0.180827	3	1202	36.915	53.5369	78.6266	56.3595	1.75097	0.372582	20.9985	3	1369	0.455512	-1.13444
A0A024R4E5;Q00341;Q00341-2;H0Y394;H7C0A4;C9J5E5;C9JIZ1;C9JZI8;C9JES8;C9JHZ8;C9JHS7;H7BZC3;C9JBS3;C9JEJ8;C9JHN6;C9JK79;C9JT62;H7C2D1	22	7	141.152	0.424908	0.371705	0.138536	1.03527	0.106777	PF44	CF42	142067	High density lipoprotein binding protein (Vigilin)_ isoform CRA_a OS=Homo sapiens OX=9606 GN=HDLBP PE=1 SV=1	1493.86	1337.24	1478.25	1436.45	3.15729	0.0600581	3	346	1519.71	1509.94	1431.7	1487.11	3.17234	0.0324391	48.2406	3	329	1.03527	0.0500087
P09429;P26583;Q5T7C4;D6R9A6;P23497	5	1	28.0616	0.202236	0.694142	0.08007	1.27737	0.218534	PF44	CF42	25064.9	High mobility group protein B1 OS=Homo sapiens OX=9606 GN=HMGB1 PE=1 SV=3	211.991	275.776	219.446	235.737	2.37243	0.147936	3	975	239.977	375.559	287.832	301.123	2.47874	0.22835	68.7613	3	890	1.27737	0.353172
Q7Z353;Q7Z353-2	6	1	24.3006	0.0912949	1.03955	0.0452998	1.07412	0.394932	PF44	CF42	77890.2	Highly divergent homeobox OS=Homo sapiens OX=9606 GN=HDX PE=1 SV=1	583.842	596.408	570.646	583.632	2.76614	0.022073	3	636	628.377	657.895	594.403	626.892	2.79719	0.0506821	31.7722	3	616	1.07412	0.103157
P49773;D6RC06;D6RD60;D6RE99;D6REP8	2	2	13.0367	0.000497956	3.30281	0.00141434	3.16944	1	PF44	CF42	13916	Histidine triad nucleotide-binding protein 1 OS=Homo sapiens OX=9606 GN=HINT1 PE=1 SV=2	228.967	184.853	204.155	205.992	2.31385	0.107354	3	1025	540.368	733.967	684.301	652.879	2.81483	0.154013	100.552	3	595	3.16944	1.66423
A0A087X0Y2;A0A087X248;A0A087X2I9;A0A096LPD8;F5GWV3;F5H3N7;F5H8B4;O14607;O14607-2;O14607-3;O14607-4;A6NCS7;O14607-5	5	1	17.9535	0.00214657	2.66826	0.00368333	4.13913	0.998846	CF42	PF44	157378	Histone demethylase UTY OS=Homo sapiens OX=9606 GN=UTY PE=1 SV=1	737.41	585.58	661.245	661.412	2.82047	0.114777	3	583	104.616	180.747	194.022	159.795	2.20356	0.301921	48.2454	3	1101	0.241597	-2.04933
P16402;P10412;P16403;P22492;Q02539	6	5	30.9958	0.0162682	1.78866	0.013397	1.27158	0.841583	PF44	CF42	22349.9	Histone H1.3 OS=Homo sapiens OX=9606 GN=HIST1H1D PE=1 SV=2	1048.97	887.771	872.673	936.473	2.9715	0.10435	3	459	1161.27	1229.02	1182.12	1190.8	3.07584	0.029141	34.7012	3	392	1.27158	0.346625
P16401	7	3	41.0569	0.839701	0.0758753	0.234384	1.01462	0.0533113	PF44	CF42	22580.2	Histone H1.5 OS=Homo sapiens OX=9606 GN=HIST1H1B PE=1 SV=3	1423.7	1292.02	1192.99	1302.91	3.11491	0.088831	3	374	1313.74	1433.08	1219.05	1321.96	3.12122	0.0811328	107.254	3	366	1.01462	0.0209426
Q9BTM1;A0A0U1RR32;A0A0U1RRH7;P0C0S8;P20671;Q16777;Q6FI13;Q96KK5;Q99878;H0YFX9;P04908;Q7L7L0;Q93077;Q9BTM1-2;P16104;Q96QV6;C9J0D1;Q71UI9-2;C9J386;Q71UI9-5;Q8IUE6	15	11	76.9468	0.00129642	2.88726	0.00264626	1.311	0.999891	PF44	CF42	14019.4	Histone H2A.J OS=Homo sapiens OX=9606 GN=H2AFJ PE=1 SV=1	22319.1	21372.3	20393	21361.5	4.32963	0.0450851	3	22	27684.3	29170.8	27159.4	28004.8	4.44723	0.0372538	1043.29	3	18	1.311	0.390664
Q96A08	7	2	45.7822	0.00100683	2.99704	0.00221397	1.19865	0.999975	PF44	CF42	14167.5	Histone H2B type 1-A OS=Homo sapiens OX=9606 GN=HIST1H2BA PE=1 SV=3	12803.5	12923.8	12367.3	12698.2	4.10374	0.0230611	3	42	15269.1	14770.7	15622.2	15220.6	4.18243	0.0281071	427.808	3	37	1.19865	0.261407
Q93079;O60814;P57053;P58876;P62807;Q5QNW6;Q5QNW6-2;Q99877;Q99879;Q99880;U3KQK0;A0A2R8Y619	13	4	90.3602	0.574541	0.240679	0.174719	1.02435	0.0766802	PF44	CF42	13892.1	Histone H2B type 1-H OS=Homo sapiens OX=9606 GN=HIST1H2BH PE=1 SV=3	3205.59	3527.57	3482.56	3405.24	3.53215	0.0512035	3	163	3642.47	3328.05	3493.9	3488.14	3.54259	0.045093	157.291	3	152	1.02435	0.0347038
Q16695;K7EK07;P68431;P84243;Q71DI3;Q6NXT2;B4DEB1;K7EMV3;K7ES00;K7EP01	20	9	66.7022	0.137396	0.862027	0.0600158	1.08616	0.297446	PF44	CF42	15622.3	Histone H3.1t OS=Homo sapiens OX=9606 GN=HIST3H3 PE=1 SV=3	5204.04	5092.39	4865.7	5054.04	3.70364	0.0341106	3	101	5098.33	5834.67	5535.55	5489.52	3.73953	0.0674606	370.326	3	96	1.08616	0.119242
P62805	27	19	136.465	0.0605049	1.21821	0.0336682	1.05651	0.504125	PF44	CF42	11367.4	Histone H4 OS=Homo sapiens OX=9606 GN=HIST1H4A PE=1 SV=2	14698.3	14978.7	15090.2	14922.4	4.17384	0.0135311	3	33	15994	15160.3	16142.6	15765.6	4.19771	0.0335821	529.443	3	35	1.05651	0.0793029
Q03164;Q03164-2;Q03164-3;E9PR05	7	2	27.7392	0.221493	0.654641	0.0860195	1.09229	0.202002	PF44	CF42	436327	Histone-lysine N-methyltransferase 2A OS=Homo sapiens OX=9606 GN=KMT2A PE=1 SV=5	1259.07	1204.59	1330.35	1264.67	3.10198	0.0498679	3	381	1513.16	1368.18	1262.81	1381.38	3.14031	0.0909913	125.694	3	351	1.09229	0.127355
Q9NR48;Q9NR48-2;F8VWK7;K7EIU3	19	2	82.5113	0.14176	0.848447	0.061264	1.97515	0.290556	CF42	PF44	336383	Histone-lysine N-methyltransferase ASH1L OS=Homo sapiens OX=9606 GN=ASH1L PE=1 SV=2	1215.27	1185.6	456.181	952.35	2.9788	0.451464	3	456	480.042	494.249	472.206	482.166	2.6832	0.0231737	11.1735	3	721	0.50629	-0.981963
O15047	9	1	35.4102	0.00202527	2.69352	0.00359427	1.37076	0.999093	CF42	PF44	186833	Histone-lysine N-methyltransferase SETD1A OS=Homo sapiens OX=9606 GN=SETD1A PE=1 SV=3	721.428	788.165	824.578	778.057	2.89101	0.0672351	3	531	572.318	584.151	546.364	567.611	2.75405	0.0340518	19.3282	3	659	0.729524	-0.454973
Q9BYW2;H7BXT4;Q9BYW2-2;Q9BYW2-3;C9JG86;H7BZ93;H7C3H4	7	1	31.4068	0.443673	0.352937	0.142923	1.07225	0.101907	CF42	PF44	290619	Histone-lysine N-methyltransferase SETD2 OS=Homo sapiens OX=9606 GN=SETD2 PE=1 SV=3	7180.69	6788.61	5706.35	6558.55	3.81681	0.116431	3	78	5736.22	6508.33	6105.36	6116.64	3.78651	0.0631359	386.179	3	88	0.932621	-0.100637
P01891;A0A140T941;A0A140T975;A0A140T9Z6;A0A1W2PQS8;A0A1W2PS39;B0UXQ0;P10314;P16189;P16190;P30459;P30512;Q9GJ45;A0A140T9Z4	9	2	57.7396	0.00208086	2.68176	0.0036284	1.65734	0.998984	PF44	CF42	41194	HLA class I histocompatibility antigen_ A-68 alpha chain OS=Homo sapiens OX=9606 GN=HLA-A PE=1 SV=4	389.872	388.442	388.688	389.001	2.58995	0.00196674	3	777	738.47	595.868	599.783	644.707	2.80936	0.125987	81.2248	3	601	1.65734	0.728871
P13747;Q6DU44	4	1	21.8235	0.999539	0.000200244	0.267389	1.00417	0.05	PF44	CF42	40384.9	HLA class I histocompatibility antigen_ alpha chain E OS=Homo sapiens OX=9606 GN=HLA-E PE=1 SV=3	320.01	293.218	314.511	309.246	2.4903	0.0457591	3	877	268.173	329.612	333.818	310.534	2.49211	0.118332	36.7463	3	880	1.00417	0.00599785
P50502;H7C3I1;Q3KNR6;Q8NFI4;F6VDH7;Q8IZP2	4	3	26.4572	0.225436	0.646977	0.0871581	1.07692	0.198886	PF44	CF42	41502.9	Hsc70-interacting protein OS=Homo sapiens OX=9606 GN=ST13 PE=1 SV=2	1316.31	1275.9	1232.38	1274.87	3.10546	0.0329245	3	378	1499.83	1335.46	1283.48	1372.92	3.13765	0.0822588	112.935	3	354	1.07692	0.106905
Q16543;K7EQA9;K7EIU0;K7EKQ2;K7EL68	6	4	39.2285	0.0801615	1.09603	0.0411504	1.16721	0.42849	PF44	CF42	44981.6	Hsp90 co-chaperone Cdc37 OS=Homo sapiens OX=9606 GN=CDC37 PE=1 SV=1	1271.41	1079.4	1087.03	1145.95	3.05916	0.0948741	3	407	1437.87	1252.12	1322.71	1337.57	3.12632	0.0700998	93.7631	3	360	1.16721	0.223069
Q4G0P3;F8WD03;Q4G0P3-10;Q4G0P3-2;Q4G0P3-5;Q4G0P3-6;Q4G0P3-8;J3QL79;J3QQJ7;H0YF91	25	3	95.9081	0.000442164	3.35442	0.00132248	3.36378	1	PF44	CF42	581311	Hydrocephalus-inducing protein homolog OS=Homo sapiens OX=9606 GN=HYDIN PE=1 SV=3	121.129	85.3356	99.991	102.152	2.00925	0.176153	3	1256	379.026	336.573	315.25	343.617	2.53607	0.0944828	32.4659	3	836	3.36378	1.75008
Q9Y4L1;A0A087WWI4;A0A087X054;E9PJ21;K7EQK2;Q9Y4L1-2;J3KTF1;J3QL06	8	3	41.5989	0.247064	0.60719	0.0926103	1.68298	0.183188	PF44	CF42	111564	Hypoxia up-regulated protein 1 OS=Homo sapiens OX=9606 GN=HYOU1 PE=1 SV=1	26.1524	130.251	123.321	93.2415	1.96961	0.624229	3	1282	190.189	149.154	131.429	156.924	2.19569	0.192072	30.1408	3	1105	1.68298	0.751021
P01871;A0A1B0GUU9;P01871-2	3	1	12.5925	0.605278	0.218045	0.182556	1.23622	0.0724368	PF44	CF42	50124.1	Immunoglobulin heavy constant mu OS=Homo sapiens OX=9606 GN=IGHM PE=1 SV=4	13.6273	41.6559	38.8403	31.3745	1.49658	0.491923	3	1457	57.7155	22.6589	35.983	38.7858	1.58867	0.456238	17.6956	3	1424	1.23622	0.305936
Q6WRI0	4	1	13.7015	0.0542158	1.26587	0.0309688	2.89149	0.534402	PF44	CF42	293119	Immunoglobulin superfamily member 10 OS=Homo sapiens OX=9606 GN=IGSF10 PE=1 SV=1	75.4293	41.2259	18.5715	45.0756	1.65394	0.635015	3	1424	168.679	93.6488	128.679	130.335	2.11506	0.288045	37.5424	3	1179	2.89149	1.53181
Q14974;J3QR48;J3KTM9;Q14974-2;J3QKQ5	12	6	82.2466	0.342308	0.465583	0.11928	1.31334	0.133851	CF42	PF44	98482	Importin subunit beta-1 OS=Homo sapiens OX=9606 GN=KPNB1 PE=1 SV=2	1206.85	2271.78	2301.98	1926.87	3.28485	0.323707	3	271	1545.15	1466.15	1390.15	1467.15	3.16647	0.0528255	77.503	3	333	0.761416	-0.393242
O00410;O00410-3;H0Y8C6;O00410-2;E7ETV3;C9JMV5;H0Y3V4;C9JZ53;E7EQT5;E7EV12;C9J875;C9JQT6;C9JXE0;C9JZD8;E7ESA1;E7ESZ1;E7ETV8;E7EWK4;E7EX05	12	7	78.5109	0.0990822	1.004	0.0477247	1.21214	0.374382	PF44	CF42	125113	Importin-5 OS=Homo sapiens OX=9606 GN=IPO5 PE=1 SV=4	701.358	525.825	690.098	639.093	2.80556	0.153741	3	599	764.645	772.53	786.828	774.668	2.88912	0.0145159	11.245	3	542	1.21214	0.277551
O95373;E9PLJ0	4	1	22.6336	0.197856	0.70365	0.0791231	2.33003	0.222631	PF44	CF42	120828	Importin-7 OS=Homo sapiens OX=9606 GN=IPO7 PE=1 SV=1	8.4565	185.611	69.9766	88.0147	1.94456	1.02192	3	1298	205.434	261.435	148.363	205.077	2.31192	0.275686	56.5369	3	1028	2.33003	1.22035
Q96P70	4	1	15.2366	0.193036	0.714361	0.0776281	2.60789	0.227301	PF44	CF42	116933	Importin-9 OS=Homo sapiens OX=9606 GN=IPO9 PE=1 SV=3		59.5836	8.91736	34.2505	1.53467	1.04601	2	1448	78.343	58.9017	41.3984	59.5477	1.77487	0.310352	18.4808	3	1357	1.7386	0.797922
Q8IWB6;Q8IWB6-2;Q8IWB6-3	3	1	13.1868	0.00848032	2.07159	0.00863459	70.3715	0.942511	CF42	PF44	169213	Inactive serine/threonine-protein kinase TEX14 OS=Homo sapiens OX=9606 GN=TEX14 PE=1 SV=2	236.479	276.238	403.115	305.277	2.48469	0.285089	3	884	13.0142			13.0142	1.11442	#DIV/0!	#DIV/0!	1	1497	0.0426309	-4.55196
Q70UQ0;Q70UQ0-2	9	2	47.1619	0.000365586	3.43701	0.00114099	1.18825	1	PF44	CF42	39423.1	Inhibitor of nuclear factor kappa-B kinase-interacting protein OS=Homo sapiens OX=9606 GN=IKBIP PE=1 SV=1	18423.4	18321.6	18122.5	18289.2	4.26219	0.00837023	3	25	22276.9	21744.3	21175.3	21732.2	4.3371	0.0253494	550.897	3	24	1.18825	0.248842
Q15181	3	1	15.4926	0.127768	0.893577	0.0570842	1.48125	0.313781	PF44	CF42	33116.3	Inorganic pyrophosphatase OS=Homo sapiens OX=9606 GN=PPA1 PE=1 SV=2	272.709	212.08	147.962	210.917	2.32411	0.295763	3	1016	386.639	291.46	259.16	312.42	2.49474	0.212129	66.2733	3	878	1.48125	0.56681
Q14573	18	1	61.6638	0.000654731	3.18394	0.00171945	2.65546	0.999999	CF42	PF44	307016	Inositol 1_4_5-trisphosphate receptor type 3 OS=Homo sapiens OX=9606 GN=ITPR3 PE=1 SV=2	813.098	857.246	783.916	818.087	2.9128	0.0451284	3	510	365.732	259.865	298.634	308.077	2.48866	0.173857	53.5613	3	881	0.376582	-1.40896
Q16270;Q16270-2	1	1	7.1058	0.000383016	3.41678	0.00117831	1.3607	1	PF44	CF42	30156.8	Insulin-like growth factor-binding protein 7 OS=Homo sapiens OX=9606 GN=IGFBP7 PE=1 SV=1	1067.01	1028	1019.93	1038.31	3.01633	0.0242495	3	438	1375.73	1380.99	1481.79	1412.83	3.15009	0.0423081	59.7744	3	346	1.3607	0.444351
P17301;E7ESP4;E7EMF1;E9PB77;D6RG08	15	11	95.4099	9.63475e-09	8.01616	5.92805e-07	3.79202	1	CF42	PF44	130550	Integrin alpha-2 OS=Homo sapiens OX=9606 GN=ITGA2 PE=1 SV=1	1132.07	1131.23	1109.93	1124.41	3.05092	0.0111615	3	414	299.605	295.78	294.175	296.52	2.47205	0.00940833	2.78976	3	897	0.263712	-1.92297
P08648;B4E3F4	6	4	30.8261	0.00772846	2.11191	0.00819855	1.42438	0.951926	CF42	PF44	115677	Integrin alpha-5 OS=Homo sapiens OX=9606 GN=ITGA5 PE=1 SV=2	462.036	496.126	462.163	473.442	2.67527	0.0414941	3	722	307.282	310.757	379.115	332.385	2.52164	0.121868	40.5072	3	846	0.702061	-0.510333
H3BN02;P20702	3	1	12.2821	0.423893	0.372743	0.138414	1.33522	0.107051	CF42	PF44	129735	Integrin alpha-X OS=Homo sapiens OX=9606 GN=ITGAX PE=1 SV=1	26.3365	43.6549	23.9736	31.3217	1.49585	0.343085	3	1458		30.4337	39.9403	35.187	1.54638	0.191041	6.72216	2	1434	1.12341	0.167881
P05556;P05556-2;P05556-3;P05556-4;P05556-5;C9JPK5;E7EQW5;E7EUI6;E9PLR6;Q5T3E6;E7ERX5;H7C4N8;C9JJP8;E9PQJ2;Q5T3E5	17	11	139.418	4.57108e-05	4.33998	0.000317539	1.64314	1	CF42	PF44	91723	Integrin beta-1 OS=Homo sapiens OX=9606 GN=ITGB1 PE=1 SV=2	4130.56	4342.82	4080.12	4184.5	3.62164	0.0333151	3	126	2466.12	2624.33	2549.5	2546.65	3.40597	0.031078	79.1449	3	211	0.608592	-0.716454
P20591;F8W8T1;P20591-2;H9KVC7;H9KVC9;C9JEL4;H9KVC4;H9KVD0;P20592-2;C9JS04;C9JZQ9	9	3	60.9107	0.001417	2.84863	0.00281546	11.9186	0.999827	PF44	CF42	75919.6	Interferon-induced GTP-binding protein Mx1 OS=Homo sapiens OX=9606 GN=MX1 PE=1 SV=4	22.4407	56.1286	62.6955	47.0883	1.67291	0.458638	3	1420	594.691	556.505	532.486	561.227	2.74914	0.0558959	31.3703	3	661	11.9186	3.57515
Q12906;Q12906-2;Q12906-3;Q12906-4;Q12906-5;Q12906-6;Q12906-7;K7EQR9;K7EKJ9	9	6	46.731	0.0649519	1.18741	0.0354008	1.16355	0.484743	PF44	CF42	95737.7	Interleukin enhancer-binding factor 3 OS=Homo sapiens OX=9606 GN=ILF3 PE=1 SV=3	854.46	834.813	793.786	827.686	2.91787	0.0374034	3	507	910.359	907.508	1071.3	963.056	2.98365	0.09735	93.7535	3	468	1.16355	0.218535
P03956	11	6	65.6818	7.63064e-05	4.11744	0.000450202	2.09218	1	CF42	PF44	54178.1	Interstitial collagenase OS=Homo sapiens OX=9606 GN=MMP1 PE=1 SV=3	1185.99	1109.07	1167.58	1154.21	3.06229	0.0347987	3	406	589.484	514.054	551.495	551.678	2.74169	0.0683655	37.7157	3	665	0.47797	-1.06501
H0YHE2;H0YIR4;Q8WYA0;Q8WYA0-3	2	1	9.805	0.0643503	1.19145	0.0352612	1.35606	0.487276	CF42	PF44	73652.5	Intraflagellar transport protein 81 homolog (Fragment) OS=Homo sapiens OX=9606 GN=IFT81 PE=1 SV=1	173.371	233.503	203.295	203.39	2.30833	0.147824	3	1029	128.117	171.062	150.78	149.986	2.17605	0.143235	21.4833	3	1124	0.737432	-0.439417
Q9Y283	3	2	11.2501	0.266977	0.573527	0.0981105	1.1219	0.170535	PF44	CF42	118910	Inversin OS=Homo sapiens OX=9606 GN=INVS PE=1 SV=2	142.297	172.612	143.926	152.945	2.18454	0.111491	3	1136	167.224	192.55	154.996	171.59	2.23449	0.111625	19.1537	3	1088	1.1219	0.16595
O75874;C9J4N6;C9JLU6;C9JJE5	4	2	24.2905	0.00507135	2.29488	0.00615269	2.17962	0.981292	CF42	PF44	46944.5	Isocitrate dehydrogenase [NADP] cytoplasmic OS=Homo sapiens OX=9606 GN=IDH1 PE=1 SV=2	527.856	648.544	608.113	594.838	2.7744	0.103271	3	627	208.123	298.985	311.619	272.909	2.43602	0.206884	56.4606	3	926	0.458796	-1.12408
P48735;P48735-2;H0YL11	5	2	25.5181	0.00143211	2.84402	0.00281546	2.7481	0.999818	CF42	PF44	51365.6	Isocitrate dehydrogenase [NADP]_ mitochondrial OS=Homo sapiens OX=9606 GN=IDH2 PE=1 SV=2	256.233	184.688	256.388	232.437	2.3663	0.177903	3	981	96.2271	78.1243	79.3913	84.5809	1.92727	0.11948	10.1058	3	1286	0.363888	-1.45843
Q03001-8;Q03001-9;Q6P0N6;H0YC82;Q03001-10;H0Y314	31	2	115.077	0.0367218	1.43508	0.0234186	1.25492	0.642397	PF44	CF42	594173	Isoform 2 of Dystonin OS=Homo sapiens OX=9606 GN=DST	1437.15	1371.97	1193.98	1334.37	3.12528	0.0943279	3	365	1516.74	1764.61	1742.23	1674.53	3.22389	0.081875	137.102	3	309	1.25492	0.327597
Q5CZC0-2;H7BZL6	17	3	63.9547	0.0519472	1.28444	0.0301528	1.91335	0.546259	CF42	PF44	394669	Isoform 2 of Fibrous sheath-interacting protein 2 OS=Homo sapiens OX=9606 GN=FSIP2	143.618	113.89	234.295	163.935	2.21467	0.382596	3	1110	75.6642	89.0424	92.3316	85.6794	1.93288	0.103035	8.82797	3	1284	0.522644	-0.9361
P06396-2;A0A0A0MS51;A0A0A0MT01;P06396-3;P06396-4;Q5T0I0;A0A0U1RQL8	14	1	92.9253	0.021605	1.66545	0.0161829	1.32714	0.779339	CF42	PF44	80925.9	Isoform 2 of Gelsolin OS=Homo sapiens OX=9606 GN=GSN	790.425	977.741	961.873	910.013	2.95905	0.114141	3	470	666.294	733.147	657.651	685.697	2.83613	0.0602592	41.3195	3	584	0.753503	-0.408315
P61978-2;P61978-3	16	1	120.647	0.0359081	1.44481	0.0231519	1.06167	0.648527	CF42	PF44	51313.5	Isoform 2 of Heterogeneous nuclear ribonucleoprotein K OS=Homo sapiens OX=9606 GN=HNRNPK	3083.67	2910.26	3002.52	2998.82	3.47695	0.0289328	3	180	2792.3	2877.55	2803.99	2824.61	3.45096	0.0163609	46.2133	3	192	0.941909	-0.0863398
P06756-2;P06756;P06756-3;H7BZG1	11	3	53.9356	0.00748618	2.12574	0.00805294	1.44401	0.954889	CF42	PF44	113284	Isoform 2 of Integrin alpha-V OS=Homo sapiens OX=9606 GN=ITGAV	132.588	112.726	115.118	120.144	2.0797	0.0902503	3	1210	76.4521	91.6238	81.5288	83.2015	1.92013	0.092822	7.72294	3	1290	0.692515	-0.530082
Q96N16-2;Q96N16-5;A0A1B0GUE0;F2Z2K5;Q96N16-3;Q96N16-4;Q96N16-7;Q96N16-6	15	1	67.5041	0.00831758	2.08	0.00859074	1.38738	0.944573	PF44	CF42	97777.9	Isoform 2 of Janus kinase and microtubule-interacting protein 1 OS=Homo sapiens OX=9606 GN=JAKMIP1	816.596	807.043	731.374	785.005	2.89487	0.0594774	3	527	1041.17	1010.68	1215.46	1089.1	3.03707	0.101444	110.482	3	423	1.38738	0.472366
Q8NF91-2;Q8NF91-8;H0Y325;Q8NF91-11;H0Y326;A0A0C4DGZ2;B9DI78;H0YBC0	12	2	43.4062	0.0233966	1.63085	0.0169074	1.41649	0.760214	PF44	CF42	383041	Isoform 2 of Nesprin-1 OS=Homo sapiens OX=9606 GN=SYNE1	94.8965	103.452	84.1802	94.1761	1.97394	0.10253	3	1280	120.827	125.122	154.25	133.4	2.12515	0.136315	18.1844	3	1166	1.41649	0.502323
Q8N4C6-10;Q8N4C6-7;C9J066;E9PN67;H0YDJ4;H9KV85;Q8N4C6;Q8N4C6-2;Q8N4C6-4;Q8N4C6-5;Q8N4C6-9	6	1	25.7711	0.052701	1.27818	0.0304672	1.57308	0.54226	CF42	PF44	248189	Isoform 3 of Ninein OS=Homo sapiens OX=9606 GN=NIN	385.526	380.307	324.586	363.473	2.56047	0.0929309	3	808	311.096	179.521	202.559	231.059	2.36372	0.3041	70.2648	3	986	0.635697	-0.65359
Q70UQ0-4	8	3	41.7583	0.0105347	1.97738	0.01002	1.25189	0.915776	CF42	PF44	43254.8	Isoform 4 of Inhibitor of nuclear factor kappa-B kinase-interacting protein OS=Homo sapiens OX=9606 GN=IKBIP	342.155	347.955	392.031	360.714	2.55716	0.0756168	3	811	278.716	283.705	301.988	288.136	2.4596	0.0425229	12.2524	3	909	0.798794	-0.324104
Q86VF2-5;Q86VF2;H7BZ61;Q86VF2-2;Q86VF2-3;Q86VF2-4	15	1	63.299	0.0300106	1.52273	0.0205165	7.87853	0.696788	CF42	PF44	385973	Isoform 5 of Immunoglobulin-like and fibronectin type III domain-containing protein 1 OS=Homo sapiens OX=9606 GN=IGFN1	48.8531	11.9927	41.6047	34.1501	1.53339	0.571834	3	1450	2.23021	1.97211	8.80143	4.33458	0.636947	0.892946	3.87055	3	1517	0.126927	-2.97793
Q14195-2;Q14195;H0YBT4;D6RF19	8	5	52.9669	3.30995e-05	4.48018	0.000241623	2.77668	1	CF42	PF44	74367.6	Isoform LCRMP-4 of Dihydropyrimidinase-related protein 3 OS=Homo sapiens OX=9606 GN=DPYSL3	397.711	435.532	374.344	402.529	2.6048	0.0767074	3	763	144.996	150.712	139.196	144.968	2.16127	0.0397198	5.75809	3	1139	0.360142	-1.47336
P14618-2;H3BTN5;H3BR70	36	2	420.38	0.000218568	3.66041	0.000817625	1.56484	1	CF42	PF44	58575.5	Isoform M1 of Pyruvate kinase PKM OS=Homo sapiens OX=9606 GN=PKM	451.727	486.021	447.776	461.841	2.66449	0.0455419	3	731	308.713	285.149	291.548	295.136	2.47002	0.0412859	12.185	3	899	0.639043	-0.646016
P09496-2;P09496;P09496-3;P09496-4;P09496-5;C9J8P9;F8WF69	4	1	25.893	0.00434712	2.3618	0.00552295	1.539	0.987535	CF42	PF44	23719	Isoform Non-brain of Clathrin light chain A OS=Homo sapiens OX=9606 GN=CLTA	2247.33	2565.09	1999.64	2270.69	3.35616	0.124829	3	233	1468.51	1513.87	1443.91	1475.43	3.16892	0.0240539	35.4898	3	331	0.649772	-0.621993
P41252;J3KR24;A0A0A0MSX9;Q5TCC6;Q5TCD1	16	5	86.9015	0.249221	0.603415	0.0933376	3.46346	0.18174	PF44	CF42	145810	Isoleucine--tRNA ligase_ cytoplasmic OS=Homo sapiens OX=9606 GN=IARS PE=1 SV=2	260.547	326.785	290.778	292.703	2.46643	0.113293	3	904	374.559	351.684	2315.06	1013.77	3.00594	1.1117	1127.01	3	451	3.46346	1.79222
Q5VZ66;Q5VZ66-2	8	2	33.3142	0.0164807	1.78302	0.0134822	1.20341	0.838957	CF42	PF44	98700.3	Janus kinase and microtubule-interacting protein 3 OS=Homo sapiens OX=9606 GN=JAKMIP3 PE=2 SV=2	314.747	322.311	298.388	311.815	2.4939	0.0392151	3	873	244.712	280.203	252.413	259.109	2.41348	0.0720502	18.6689	3	939	0.830971	-0.26713
H7BXZ5;J3QSW6;O60229;C9IZQ6;O60229-2;O60229-4;O60229-6;O60229-3;H7C0I9;O60229-5	11	1	44.2703	0.516664	0.286792	0.16125	1.12684	0.0862194	CF42	PF44	339314	Kalirin (Fragment) OS=Homo sapiens OX=9606 GN=KALRN PE=1 SV=1		125.92	99.3469	112.633	2.05167	0.166825	2	1227	62.4029	63.6205	73.8862	66.6365	1.82371	0.0946603	6.30783	3	1343	0.591623	-0.757251
Q8IYT4;Q8IYT4-2;K7EIJ8;K7EM02;K7EMW1	8	3	27.7722	0.337315	0.471965	0.117731	1.03308	0.135855	PF44	CF42	61595.1	Katanin p60 ATPase-containing subunit A-like 2 OS=Homo sapiens OX=9606 GN=KATNAL2 PE=1 SV=3	637.292	600.859	606.464	614.872	2.78878	0.0319053	3	611	647.758	605.925	651.957	635.214	2.80292	0.040067	25.4511	3	612	1.03308	0.0469565
Q9NVR0	1	1	3.813	0.0485017	1.31424	0.0286156	2.07126	0.565338	CF42	PF44	81288.8	Kelch-like protein 11 OS=Homo sapiens OX=9606 GN=KLHL11 PE=1 SV=1	257.417	253.484	182.77	231.224	2.36403	0.181677	3	983	69.6238	167.453	97.8261	111.634	2.0478	0.451074	50.3553	3	1220	0.482798	-1.05051
P13645;Q7Z3Y7;Q7Z3Y9	11	6	70.4217	0.000752786	3.12333	0.00185269	1.08397	0.999996	PF44	CF42	59055.3	Keratin_ type I cytoskeletal 10 OS=Homo sapiens OX=9606 GN=KRT10 PE=1 SV=6	1153.49	1122.41	1132.61	1136.17	3.05544	0.0139434	3	410	1238.76	1224.48	1231.47	1231.57	3.09046	0.0057991	7.14199	3	386	1.08397	0.116323
P35527;K7EQQ3	6	3	32.5377	0.242841	0.614678	0.0915052	1.06615	0.186081	CF42	PF44	62292.5	Keratin_ type I cytoskeletal 9 OS=Homo sapiens OX=9606 GN=KRT9 PE=1 SV=3	487.728	508.771	485.599	494.033	2.69376	0.0259264	3	702	426.047	499.164	464.931	463.381	2.66594	0.0789478	36.5829	3	732	0.937956	-0.092408
P04264	17	6	97.6874	0.165674	0.780745	0.0694115	1.08549	0.257519	CF42	PF44	66209.9	Keratin_ type II cytoskeletal 1 OS=Homo sapiens OX=9606 GN=KRT1 PE=1 SV=6	1570.81	1620.34	1571.92	1587.69	3.20076	0.0178121	3	318	1608.5	1386.91	1392.55	1462.65	3.16514	0.0863778	126.341	3	334	0.921247	-0.11834
P35908;H0YI76;H0YIN9	8	2	46.2632	0.985529	0.00633073	0.264958	1.02272	0.0500264	CF42	PF44	65718.1	Keratin_ type II cytoskeletal 2 epidermal OS=Homo sapiens OX=9606 GN=KRT2 PE=1 SV=2	232.608	399.344	263.513	298.488	2.47493	0.297164	3	896	316.897	284.54	274.134	291.857	2.46517	0.0764101	22.3008	3	904	0.977784	-0.0324126
P08729	9	4	66.373	0.0041723	2.37962	0.00537223	1.22058	0.988881	PF44	CF42	51442.8	Keratin_ type II cytoskeletal 7 OS=Homo sapiens OX=9606 GN=KRT7 PE=1 SV=5	1434.54	1495.31	1388.13	1439.33	3.15816	0.0373439	3	344	1744.09	1684.09	1842.25	1756.81	3.24472	0.0454497	79.8465	3	300	1.22058	0.287565
Q86UP2;Q86UP2-2;Q86UP2-4;Q86UP2-3;G3V4Y7;B7Z6P3;G3V5G2;H0YJP2;H0YJZ8	7	2	31.8811	0.0268919	1.57038	0.0188635	1.38648	0.725351	PF44	CF42	156561	Kinectin OS=Homo sapiens OX=9606 GN=KTN1 PE=1 SV=1	214.374	189.101	153.125	185.533	2.26842	0.165901	3	1061	259.779	253.652	258.286	257.239	2.41034	0.0124205	3.19504	3	947	1.38648	0.471432
O60282;A0A0G2JMZ6;O60282-2	19	1	91.8251	0.0449831	1.34695	0.0270965	15.6752	0.586291	CF42	PF44	110065	Kinesin heavy chain isoform 5C OS=Homo sapiens OX=9606 GN=KIF5C PE=1 SV=1	37.7785	13.8464	105.747	52.4574	1.71981	0.908859	3	1400	4.35889		5.68069	5.01979	0.700686	0.186193	0.934652	2	1515	0.0956928	-3.38545
P33176;C9JWB9	21	7	115.197	0.696563	0.157039	0.202898	1.02458	0.0625349	CF42	PF44	110426	Kinesin-1 heavy chain OS=Homo sapiens OX=9606 GN=KIF5B PE=1 SV=1	863.328	809.555	733.777	802.22	2.90429	0.0811328	3	517	816.758	787.233	744.935	782.975	2.89375	0.0461064	36.1002	3	536	0.976011	-0.0350309
A0A1B0GUA8;Q9H1H9;Q9H1H9-2;Q9H1H9-3;Q9H1H9-4;H0Y307;H0Y925;H0Y9Z7;Q6ZUJ8-3	8	1	37.0712	0.00637714	2.19537	0.00728542	1.74165	0.967849	PF44	CF42	208877	Kinesin-like protein KIF13A OS=Homo sapiens OX=9606 GN=KIF13A PE=1 SV=1	111.878	108.423	88.9084	103.07	2.01313	0.120164	3	1251	198.494	153.4	186.64	179.512	2.25409	0.130224	23.3768	3	1071	1.74165	0.800456
O60333;A0A087WWA3;O60333-4;Q4R9M9;O60333-2;A0A0U1RQL3	10	1	33.3943	0.278668	0.554912	0.101369	2.88228	0.163786	CF42	PF44	205902	Kinesin-like protein KIF1B OS=Homo sapiens OX=9606 GN=KIF1B PE=1 SV=5	35.0785	146.253	33.9749	71.7689	1.85594	0.898826	3	1337	0.601786	44.6899	29.4085	24.9001	1.3962	0.89908	22.3871	3	1464	0.346948	-1.52721
O43896	2	1	7.8521	0.0152261	1.81741	0.0128725	1.14771	0.854627	PF44	CF42	123802	Kinesin-like protein KIF1C OS=Homo sapiens OX=9606 GN=KIF1C PE=1 SV=3	376.123	411.336	416.175	401.212	2.60337	0.0544887	3	764	466.235	465.498	449.686	460.473	2.6632	0.0203033	9.34911	3	735	1.14771	0.198754
Q86VH2;Q86VH2-2;Q86VH2-3;Q86VH2-4;H7C4Y3	10	1	45.0283	0.000180218	3.7442	0.000718693	1.57849	1	CF42	PF44	161424	Kinesin-like protein KIF27 OS=Homo sapiens OX=9606 GN=KIF27 PE=2 SV=1	833.344	937.023	882.758	884.375	2.94664	0.0586384	3	483	562.76	561.483	556.554	560.266	2.74839	0.00584854	3.27674	3	662	0.633516	-0.658548
Q2M1P5	10	2	38.1099	0.178085	0.749372	0.0732573	1.47403	0.242965	CF42	PF44	151500	Kinesin-like protein KIF7 OS=Homo sapiens OX=9606 GN=KIF7 PE=1 SV=2	137.601	103.944	79.0118	106.852	2.02878	0.275173	3	1237	49.6142	77.2266	90.6284	72.4897	1.86028	0.288501	20.9134	3	1323	0.678411	-0.559769
H3BRB3;Q14807;Q14807-2	3	1	9.4454	0.925751	0.0335059	0.252749	8.93196	0.0506991	CF42	PF44	68038	Kinesin-like protein OS=Homo sapiens OX=9606 GN=KIF22 PE=1 SV=1		830.23	904.501	867.366	2.9382	0.0605488	2	492	97.2395	25.5271	71.4497	64.7388	1.81116	0.561089	36.3242	3	1349	0.0746384	-3.74394
P50748;E7ES84;P50748-2	8	2	37.1612	0.763491	0.117196	0.217246	1.00793	0.0573877	PF44	CF42	253372	Kinetochore-associated protein 1 OS=Homo sapiens OX=9606 GN=KNTC1 PE=1 SV=1	2276.88	2312.55	2181.47	2256.97	3.35353	0.0300283	3	235	2345.03	2209.23	2270.31	2274.86	3.35695	0.0298983	68.0145	3	239	1.00793	0.0113913
P42166;G5E972;P42167;P42167-2;P42167-3;H0YJH7	6	1	29.5526	0.00911342	2.04032	0.00902435	1.25507	0.934387	CF42	PF44	76062.4	Lamina-associated polypeptide 2_ isoform alpha OS=Homo sapiens OX=9606 GN=TMPO PE=1 SV=2	843.366	921.676	866.908	877.317	2.94316	0.0457982	3	489	739.392	712.145	645.511	699.016	2.84449	0.0690945	48.2981	3	577	0.796766	-0.327772
P20700;E9PBF6;A0A0D9SFE5;A0A0D9SFY5	12	1	66.6633	0.364751	0.438004	0.124779	95.659	0.12543	CF42	PF44	66693.6	Lamin-B1 OS=Homo sapiens OX=9606 GN=LMNB1 PE=1 SV=2	99.5737	0.408848	0.365979	33.4495	1.52439	1.71199	3	1452	0.33314	0.331698	0.384186	0.349675	-0.456336	0.0854986	0.0298967	3	1523	0.0104538	-6.57983
Q03252	8	1	51.3527	0.158493	0.79999	0.0670551	2.69206	0.266685	PF44	CF42	70062.6	Lamin-B2 OS=Homo sapiens OX=9606 GN=LMNB2 PE=1 SV=4	8.50019	38.8501	29.6184	25.6562	1.40919	0.606404	3	1474	33.0462	55.4227	118.735	69.068	1.83928	0.643486	44.4443	3	1334	2.69206	1.42871
Q16787;A0A0A0MSA0;Q16787-3;A0A0A0MTS5;A0A0A6YYF2;Q16787-1;Q16787-4;K7EIP4;A0A075B783;K7ERM0	10	1	40.9338	0.491715	0.308286	0.155491	1.23187	0.0910628	CF42	PF44	375888	Laminin subunit alpha-3 OS=Homo sapiens OX=9606 GN=LAMA3 PE=1 SV=2	67.1877	67.4593	38.3441	57.6637	1.7609	0.290162	3	1382	28.2459	62.4099	49.7742	46.81	1.67034	0.369019	17.2738	3	1402	0.811776	-0.300847
P11047	12	2	57.5536	0.066428	1.17765	0.0359424	1.38958	0.478639	CF42	PF44	183306	Laminin subunit gamma-1 OS=Homo sapiens OX=9606 GN=LAMC1 PE=1 SV=3	277.577	398.492	378.241	351.436	2.54585	0.184275	3	825	277.823	225.786	255.117	252.909	2.40296	0.103155	26.0888	3	949	0.719643	-0.474646
Q659C4;Q659C4-2;Q659C4-6;Q6PKG0;Q6PKG0-3	4	2	17.6728	0.00264789	2.5771	0.00410227	1.29826	0.997413	PF44	CF42	105836	La-related protein 1B OS=Homo sapiens OX=9606 GN=LARP1B PE=1 SV=2	419.319	383.976	383.361	395.552	2.5972	0.0520409	3	769	524.786	487.489	528.314	513.53	2.71057	0.0440494	22.6207	3	702	1.29826	0.376581
P46379;A0A024RCR6;A0A0G2JJM1;A0A0G2JK23;A0A0G2JL47;F6S6P2;P46379-2;P46379-3;P46379-4;P46379-5;X6REW1	2	1	6.4978	0.0139972	1.85396	0.0121543	3.83006	0.870331	CF42	PF44	119865	Large proline-rich protein BAG6 OS=Homo sapiens OX=9606 GN=BAG6 PE=1 SV=2	176.896	148.185	86.5541	137.212	2.13739	0.336413	3	1169	39.6185	46.7961	21.0605	35.825	1.55419	0.370706	13.2806	3	1432	0.261093	-1.93737
O95461;O95461-2;B0QY08;B7ZB85	3	1	12.5857	0.306216	0.513972	0.109365	2.0719	0.149562	PF44	CF42	88750.5	LARGE xylosyl- and glucuronyltransferase 1 OS=Homo sapiens OX=9606 GN=LARGE1 PE=1 SV=1		135.036	129.134	132.085	2.12085	0.0315981	2	1184	193.036	189.859	164.439	182.444	2.26113	0.0859118	15.6741	3	1067	1.38127	0.465991
F8W9S8;Q8NA19;Q8NA19-2;J3QLK8	4	1	20.4106	0.108992	0.962605	0.0514155	2.27734	0.351065	CF42	PF44	71106.4	Lethal(3)malignant brain tumor-like protein 4 OS=Homo sapiens OX=9606 GN=L3MBTL4 PE=1 SV=1	206.408	230.445	226.006	220.953	2.3443	0.0578866	3	1000	30.2594	74.4653	186.343	97.0224	1.98687	0.829184	80.4494	3	1258	0.439109	-1.18735
P42704;A0A0C4DG06;B8ZZ38;C9JCA9	19	4	90.4316	0.0373192	1.42807	0.0236023	1.26753	0.637972	PF44	CF42	159103	Leucine-rich PPR motif-containing protein_ mitochondrial OS=Homo sapiens OX=9606 GN=LRPPRC PE=1 SV=3	255.807	294.271	327.046	292.375	2.46594	0.121958	3	908	348.76	371.851	391.171	370.594	2.5689	0.0572947	21.2331	3	801	1.26753	0.34202
Q5S007;A0A1B0GUQ3;E9PC85;C9JBF0	11	1	47.9909	0.386873	0.412431	0.128866	1.03591	0.117968	CF42	PF44	289753	Leucine-rich repeat serine/threonine-protein kinase 2 OS=Homo sapiens OX=9606 GN=LRRK2 PE=1 SV=2	2194.06	2096.06	1950.05	2080.06	3.31808	0.0590318	3	253	2027.61	2019.63	1976.62	2007.95	3.30275	0.0136596	27.4279	3	262	0.965333	-0.0509015
Q96AG4	10	7	47.2568	0.302398	0.51942	0.108547	1.08598	0.151406	PF44	CF42	35329.7	Leucine-rich repeat-containing protein 59 OS=Homo sapiens OX=9606 GN=LRRC59 PE=1 SV=1	896.226	846.31	989.652	910.729	2.95939	0.0798954	3	468	1053.54	1023.45	890.104	989.031	2.99521	0.087949	86.9844	3	459	1.08598	0.118994
A0A075B6E9;Q96NW7;Q96NW7-2	2	1	7.6192	0.819371	0.0865192	0.230511	1.22417	0.0542279	PF44	CF42	169302	Leucine-rich repeat-containing protein 7 OS=Homo sapiens OX=9606 GN=LRRC7 PE=1 SV=1	58.6183	41.2441	28.0075	42.6233	1.62965	0.360176	3	1428	20.5031	63.1562	72.8756	52.1783	1.71749	0.533913	27.8587	3	1382	1.22417	0.291807
Q14847;C9J9W2;Q14847-2;Q14847-3;F6S2S5	9	6	63.5586	0.0164597	1.78358	0.0134822	1.22392	0.839216	PF44	CF42	30116.4	LIM and SH3 domain protein 1 OS=Homo sapiens OX=9606 GN=LASP1 PE=1 SV=2	4171.57	3671.15	3546.57	3796.43	3.57938	0.0871352	3	144	4609.58	4553.95	4776	4646.51	3.66713	0.0248654	115.537	3	118	1.22392	0.291503
Q8WWI1;J3KP06;F8WD26;Q8WWI1-2;Q8WWI1-4;E9PMT2;A0A0A0MTE2;Q8WWI1-5;Q8WWI1-3;H0Y424;E9PMS6;E9PMP7;E9PRJ0;E9PRE3;H0YDG6;E9PJ10;E9PK58;E9PLU6;H0YE95	22	4	110.559	0.35748	0.446748	0.122877	1.06107	0.128058	PF44	CF42	194122	LIM domain only protein 7 OS=Homo sapiens OX=9606 GN=LMO7 PE=1 SV=3	1352.8	1578.24	1644.35	1525.13	3.18331	0.100229	3	324	1585.4	1637.88	1631.54	1618.28	3.20905	0.0177029	28.6482	3	316	1.06107	0.0855233
P50851;E9PEM5;P50851-2	3	1	10.7785	0.0262658	1.58061	0.0185756	1.08838	0.731367	PF44	CF42	321789	Lipopolysaccharide-responsive and beige-like anchor protein OS=Homo sapiens OX=9606 GN=LRBA PE=1 SV=4	3247.71	3361.42	3491.69	3366.94	3.52724	0.0362594	3	166	3574.94	3679.94	3738.71	3664.53	3.56402	0.0226408	82.9679	3	145	1.08838	0.122189
P00338;P00338-3;P00338-4;P00338-2;P00338-5;F5GXY2;F5GYU2;F5GXH2;F5H5J4;F5H6W8;A0A087WUM2;F5GWW2;F5GXC7;F5GXU1;F5GZQ4;F5H8H6;Q6ZMR3	35	20	196.086	2.29714e-05	4.63881	0.000190263	1.35884	1	CF42	PF44	36973.9	L-lactate dehydrogenase A chain OS=Homo sapiens OX=9606 GN=LDHA PE=1 SV=2	15802.7	15361.9	16024.5	15729.7	4.19672	0.0214427	3	31	11449.5	11656.6	11621.4	11575.9	4.06355	0.0095719	110.803	3	48	0.735924	-0.442371
P07195;A8MW50;C9J7H8;F5H793	23	13	179.476	0.0160467	1.79461	0.0132908	1.18098	0.844333	CF42	PF44	36923.7	L-lactate dehydrogenase B chain OS=Homo sapiens OX=9606 GN=LDHB PE=1 SV=2	4524.44	4706.21	4792.74	4674.46	3.66973	0.0292951	3	107	4265.61	3790.28	3818.46	3958.12	3.59749	0.0673727	266.669	3	135	0.846754	-0.239986
O95573	5	1	26.079	0.010985	1.9592	0.0102186	2.08023	0.909829	CF42	PF44	81389.7	Long-chain-fatty-acid--CoA ligase 3 OS=Homo sapiens OX=9606 GN=ACSL3 PE=1 SV=3	183.727	210.204	206.003	199.978	2.30098	0.0711582	3	1033	129.666	80.9612	77.7701	96.1325	1.98287	0.30255	29.0849	3	1260	0.480715	-1.05675
Q9NZR2;H0Y7T7	13	3	48.0642	8.12712e-05	4.09006	0.000473015	5.51401	1	CF42	PF44	535173	Low-density lipoprotein receptor-related protein 1B OS=Homo sapiens OX=9606 GN=LRP1B PE=1 SV=2	401.752	383.255	354.77	379.926	2.5797	0.0622953	3	787	83.0301	61.5292	62.1462	68.9018	1.83823	0.177634	12.2393	3	1335	0.181356	-2.4631
P41229;P41229-2;P41229-5	3	1	11.6342	0.0462184	1.33518	0.0275325	1.56555	0.578755	CF42	PF44	178401	Lysine-specific demethylase 5C OS=Homo sapiens OX=9606 GN=KDM5C PE=1 SV=2	111.657	125.266	139.434	125.453	2.09848	0.110714	3	1198	102.918	76.2578	61.2239	80.1334	1.90381	0.263507	21.1157	3	1297	0.638754	-0.646667
Q96N66;Q96N66-2;Q96N66-3	4	3	25.2658	0.141818	0.848269	0.061264	1.14251	0.290467	CF42	PF44	53449.4	Lysophospholipid acyltransferase 7 OS=Homo sapiens OX=9606 GN=MBOAT7 PE=1 SV=2	537.579	512.226	452.822	500.876	2.69973	0.086855	3	696	398.915	477.924	438.361	438.4	2.64187	0.0901105	39.5044	3	750	0.875266	-0.192206
O00754;O00754-2;M0QZ24	3	1	16.1438	0.0323004	1.49079	0.0216692	14.0725	0.677209	PF44	CF42	114429	Lysosomal alpha-mannosidase OS=Homo sapiens OX=9606 GN=MAN2B1 PE=1 SV=3		9.04825		9.04825	0.956565	#DIV/0!	1	1512	48.5028	61.3062	17.5227	42.4439	1.62782	0.53039	22.5118	3	1412	4.69084	2.22985
P07333	2	1	6.9539	7.27147e-06	5.13838	0.000104222	34.2829	1	PF44	CF42	109181	Macrophage colony-stimulating factor 1 receptor OS=Homo sapiens OX=9606 GN=CSF1R PE=1 SV=2	5.70717	6.3883	8.05783	6.71777	0.827225	0.180041	3	1516	225.961	256.756	208.196	230.304	2.3623	0.106682	24.5694	3	987	34.2829	5.09942
P14174	6	4	31.3227	0.161422	0.792037	0.0680271	1.0594	0.262875	PF44	CF42	12647.4	Macrophage migration inhibitory factor OS=Homo sapiens OX=9606 GN=MIF PE=1 SV=4	5738.75	5785.92	6270.25	5931.64	3.77317	0.0495965	3	85	6509.33	6233.65	6108.89	6283.96	3.79823	0.0326074	204.904	3	86	1.0594	0.0832421
P40121;P40121-2;B8ZZL6;E7ENU9;H7C0X8	8	4	51.3439	0.000898944	3.04627	0.00204852	1.71403	0.999988	CF42	PF44	38783.7	Macrophage-capping protein OS=Homo sapiens OX=9606 GN=CAPG PE=1 SV=2	1873.18	2065.42	1851.76	1930.12	3.28559	0.0609608	3	270	1212.03	1144.56	1021.62	1126.07	3.05157	0.0857349	96.5437	3	411	0.58342	-0.777394
Q2M385	2	1	6.9276	0.376127	0.424665	0.126067	1.11721	0.121496	PF44	CF42	79613.7	Macrophage-expressed gene 1 protein OS=Homo sapiens OX=9606 GN=MPEG1 PE=2 SV=1	213.771	160.782	176.4	183.651	2.26399	0.148262	3	1065	178.679	232.084	204.767	205.177	2.31213	0.130155	26.7047	3	1027	1.11721	0.159897
D6RE79;D6RIZ4;Q14728	1	1	4.1841	0.0438275	1.35825	0.026737	17.0097	0.593525	CF42	PF44	51058.7	Major facilitator superfamily domain-containing protein 10 OS=Homo sapiens OX=9606 GN=MFSD10 PE=1 SV=1	263.575	286.928	261.989	270.83	2.4327	0.0515565	3	926	17.5705	30.1959		23.8832	1.37809	0.373798	8.92751	2	1466	0.0881852	-3.50332
A2A2V1;P04156;P04156-2	1	1	7.5722	0.000557325	3.25389	0.00153717	1.76678	1	CF42	PF44	27506.9	Major prion protein (Fragment) OS=Homo sapiens OX=9606 GN=PRNP PE=1 SV=1	2590.04	2408.99	2569.01	2522.68	3.40186	0.0392498	3	213	1570.51	1314.14	1398.86	1427.84	3.15468	0.0914794	130.618	3	341	0.566	-0.821126
Q14764;H3BQK6;H3BRL2;H3BNF6;H3BUK7;H3BP76	23	13	146.867	0.117444	0.930168	0.0538686	1.1135	0.333288	PF44	CF42	99612.1	Major vault protein OS=Homo sapiens OX=9606 GN=MVP PE=1 SV=4	1445.28	1431.83	1479.83	1452.31	3.16206	0.0170485	3	337	1782.22	1570.89	1498.33	1617.14	3.20875	0.0912024	147.488	3	317	1.1135	0.155097
P40925;P40925-3;P40925-2;C9JF79;C9JRL4;B9A041;B8ZZ51;C9JLV6	11	4	70.3766	0.00195254	2.7094	0.00353339	1.27174	0.999223	CF42	PF44	36654.3	Malate dehydrogenase_ cytoplasmic OS=Homo sapiens OX=9606 GN=MDH1 PE=1 SV=4	4107.46	4459.61	4041.49	4202.85	3.62354	0.0534851	3	125	3224.45	3373.04	3316.94	3304.81	3.51915	0.0227044	75.0337	3	164	0.786327	-0.3468
P40926;P40926-2;G3XAL0	17	15	124.363	2.40633e-06	5.61865	4.9352e-05	2.55531	1	PF44	CF42	35959.6	Malate dehydrogenase_ mitochondrial OS=Homo sapiens OX=9606 GN=MDH2 PE=1 SV=3	1878.63	1794.78	1823.54	1832.32	3.263	0.0232519	3	282	4559.36	4861.94	4625.13	4682.14	3.67044	0.0339896	159.144	3	116	2.55531	1.3535
F5H1S8;Q14165;F5GX14;H0YG07	3	1	17.7381	0.110861	0.955223	0.052013	1.18323	0.34698	CF42	PF44	16786.2	Malectin (Fragment) OS=Homo sapiens OX=9606 GN=MLEC PE=1 SV=1	628.487	773.689	680.376	694.184	2.84147	0.105994	3	560	641.393	529.444	589.217	586.685	2.7684	0.095481	56.0173	3	639	0.845143	-0.242733
Q13724;Q13724-2;C9J8D4	3	1	12.2186	0.0371837	1.42965	0.0235512	2.15785	0.63897	CF42	PF44	92088.8	Mannosyl-oligosaccharide glucosidase OS=Homo sapiens OX=9606 GN=MOGS PE=1 SV=5	385.046	238.978	319.979	314.668	2.49785	0.232558	3	868	90.9475	185.947	160.579	145.824	2.16383	0.337312	49.1883	3	1136	0.463424	-1.1096
A0A0R4J2E8;A8MXP9;P43243;D6REM6;B3KM87;D6R991;P43243-2;H0Y8T4;Q68E03;D6RAM9;D6RAY2;D6RBI2;D6RE02;D6RIA2	11	3	58.902	0.000117014	3.93176	0.000550878	2.12624	1	PF44	CF42	95136.6	Matrin-3 OS=Homo sapiens OX=9606 GN=MATR3 PE=1 SV=1	358.747	362.947	333.454	351.716	2.54619	0.0453608	3	823	793.13	763.255	687.111	747.832	2.8738	0.0730995	54.6662	3	553	2.12624	1.0883
P50281;F8W1B7	4	1	18.0648	0.0216532	1.66448	0.0161908	1.39842	0.778813	CF42	PF44	66236.2	Matrix metalloproteinase-14 OS=Homo sapiens OX=9606 GN=MMP14 PE=1 SV=3	1387.41	1343.96	1267.08	1332.82	3.12477	0.0457177	3	366	1043.88	790.424	1024.95	953.086	2.97913	0.148136	141.186	3	473	0.715092	-0.4838
Q8IWI9;Q8IWI9-3;Q8IWI9-4;H3BP52;H3BTF4	8	1	35.1008	0.0028887	2.5393	0.00429017	3.9967	0.996478	CF42	PF44	334004	MAX gene-associated protein OS=Homo sapiens OX=9606 GN=MGA PE=1 SV=3	142.408	231.407	218.152	197.322	2.29518	0.243343	3	1037	61.2254	36.7735	50.1151	49.3713	1.69347	0.247976	12.2429	3	1391	0.250206	-1.99881
O00264;O00264-2	3	1	17.1746	0.879938	0.0555479	0.242628	1.00487	0.0518409	PF44	CF42	21785.2	Membrane-associated progesterone receptor component 1 OS=Homo sapiens OX=9606 GN=PGRMC1 PE=1 SV=3	1096.89	1138.47	1062.91	1099.43	3.04117	0.0344177	3	421	1062.98	1104.16	1147.22	1104.78	3.04328	0.0381283	42.1234	3	420	1.00487	0.00701289
O15173;O15173-2	1	1	6.0668	0.683356	0.165353	0.200216	1.08916	0.063746	CF42	PF44	23875.5	Membrane-associated progesterone receptor component 2 OS=Homo sapiens OX=9606 GN=PGRMC2 PE=1 SV=1	467.764	457.347	297.41	407.507	2.61014	0.234325	3	759	388.487	369.126	364.83	374.148	2.57304	0.0336839	12.6028	3	800	0.918138	-0.123217
E9PD25;O43897	2	1	6.9466	0.0724391	1.14003	0.0383866	1.56101	0.455308	CF42	PF44	119617	Metalloendopeptidase OS=Homo sapiens OX=9606 GN=TLL1 PE=1 SV=1	598.505	401.948	467.402	489.285	2.68956	0.204562	3	706	396.938	304.429	238.955	313.441	2.49616	0.253242	79.3764	3	876	0.64061	-0.642483
Q6N021;E7EQS8;E7EPB1;Q6N021-2;Q6N021-3;D6RE87	5	1	21.7165	0.0345298	1.46181	0.022499	4.43085	0.659188	PF44	CF42	226378	Methylcytosine dioxygenase TET2 OS=Homo sapiens OX=9606 GN=TET2 PE=1 SV=3	11.4812	57.7164	10.1927	26.4634	1.42265	1.02305	3	1473	88.6441	131.736	131.386	117.255	2.06913	0.211323	24.7788	3	1210	4.43085	2.14758
C9JRZ6;F8WAR4;Q9NX63;A0A286YEX5	5	1	24.1952	0.593752	0.226395	0.179835	1.03397	0.0739677	PF44	CF42	27038.2	MICOS complex subunit OS=Homo sapiens OX=9606 GN=CHCHD3 PE=1 SV=2	188.863	180.996	213.148	194.335	2.28855	0.0862435	3	1046	191.92	196.157	214.732	200.937	2.30306	0.0603855	12.1336	3	1042	1.03397	0.0481905
Q9Y4B5;Q9Y4B5-2;Q9Y4B5-3;J3QL92	5	1	20.0369	0.337621	0.471571	0.117742	1.63458	0.13573	PF44	CF42	210781	Microtubule cross-linking factor 1 OS=Homo sapiens OX=9606 GN=MTCL1 PE=1 SV=5	5.98759	362.257	215.435	194.56	2.28905	0.920281	3	1045	344.564	334.796	274.712	318.024	2.50246	0.11894	37.8258	3	869	1.63458	0.708922
H0Y390	23	2	81.9262	0.0155246	1.80898	0.0130085	1.48907	0.850864	CF42	PF44	508325	Microtubule-actin cross-linking factor 1_ isoforms 1/2/3/5 (Fragment) OS=Homo sapiens OX=9606 GN=MACF1 PE=1 SV=1	193.61	240.879	225.494	219.994	2.34241	0.109594	3	1003	143.018	131.111	169.088	147.739	2.1695	0.131473	19.4237	3	1130	0.671559	-0.574415
E9PNZ4;E9PLY5;E9PLY0	9	1	34.184	0.782843	0.106325	0.22182	1.06237	0.0561834	PF44	CF42	232688	Microtubule-actin cross-linking factor 1_ isoforms 1/2/3/5 (Fragment) OS=Homo sapiens OX=9606 GN=MACF1 PE=1 SV=1	28.6919	37.9213	49.0032	38.5388	1.5859	0.263883	3	1435	30.175	14.2637	78.3886	40.9424	1.61217	0.815558	33.3909	3	1416	1.06237	0.0872848
P78559;E9PGC8;P78559-2	20	4	96.5027	0.131603	0.880734	0.0582469	1.10816	0.307077	CF42	PF44	306968	Microtubule-associated protein 1A OS=Homo sapiens OX=9606 GN=MAP1A PE=1 SV=6	532.906	484.511	521.295	512.904	2.71004	0.0492593	3	687	476.571	490.814	421.143	462.843	2.66543	0.079528	36.8089	3	733	0.902396	-0.148167
P46821;D6RA32;D6RA40;D6RCL2;D6RGJ3	24	12	166.237	0.00012023	3.91999	0.000550878	1.28721	1	CF42	PF44	271832	Microtubule-associated protein 1B OS=Homo sapiens OX=9606 GN=MAP1B PE=1 SV=2	1537.3	1515.08	1514.44	1522.27	3.18249	0.00854929	3	326	1216.67	1149.86	1181.33	1182.62	3.07284	0.0282622	33.4233	3	393	0.776874	-0.364247
E7EVA0;P27816;P27816-6;P27816-2;P27816-5;P27816-4;H7C4C5;B5MEG9;F8W9U4;H0Y2V1;H7C456	21	10	130.164	0.0757516	1.12061	0.0395945	1.05496	0.443404	PF44	CF42	246699	Microtubule-associated protein OS=Homo sapiens OX=9606 GN=MAP4 PE=1 SV=1	1409.21	1451.71	1458.25	1439.72	3.15828	0.0184937	3	343	1578.84	1491.47	1486.23	1518.85	3.18151	0.0342536	52.0259	3	328	1.05496	0.0771825
Q15691	4	3	19.3489	0.746646	0.126885	0.213956	1.02959	0.0585357	CF42	PF44	30170.2	Microtubule-associated protein RP/EB family member 1 OS=Homo sapiens OX=9606 GN=MAPRE1 PE=1 SV=3	163.289	146.516	171.606	160.47	2.20539	0.0796436	3	1116	182.149	133.343	152.085	155.859	2.19273	0.157968	24.6207	3	1107	0.971265	-0.042063
O15021;O15021-3;O15021-2;O15021-6;H7C1I9;D6RAK1;E7EX28;O15021-4;O60307	15	2	57.6342	0.0501873	1.29941	0.0294087	1.11975	0.555836	PF44	CF42	286322	Microtubule-associated serine/threonine-protein kinase 4 OS=Homo sapiens OX=9606 GN=MAST4 PE=1 SV=4	14412.5	13170.4	14002.4	13861.8	4.14182	0.0456588	3	38	16472.9	15205.6	14886.8	15521.8	4.19094	0.0540524	838.989	3	36	1.11975	0.163181
Q8TCT9;Q8TCT9-5;A0A075B6F6;Q8TCT9-2;Q8TCT9-4;A0A0C4DGU3	5	3	30.4573	0.23155	0.635355	0.0883934	1.17184	0.194217	PF44	CF42	41773.6	Minor histocompatibility antigen H13 OS=Homo sapiens OX=9606 GN=HM13 PE=1 SV=1	381.595	357.088	291.982	343.555	2.536	0.134809	3	836	348.26	402.005	457.513	402.593	2.60487	0.135693	54.6289	3	779	1.17184	0.22878
Q3SY69;Q3SY69-3;H0YHN9;Q3SY69-2	12	1	51.044	0.13009	0.885755	0.0579168	1.66811	0.309689	PF44	CF42	102430	Mitochondrial 10-formyltetrahydrofolate dehydrogenase OS=Homo sapiens OX=9606 GN=ALDH1L2 PE=1 SV=2	35.281	103.237	45.4154	61.3113	1.78754	0.597949	3	1367	105.261	107.144	94.4162	102.274	2.00976	0.0671691	6.86963	3	1244	1.66811	0.738211
M0R2F8	2	1	7.472	0.974369	0.0112767	0.262296	1.0432	0.050083	PF44	CF42	17844.3	Mitochondrial import inner membrane translocase subunit TIM50 OS=Homo sapiens OX=9606 GN=TIMM50 PE=1 SV=2	332.294	310.298	242.798	295.13	2.47001	0.15802	3	900	198.231	269.988	455.423	307.881	2.48838	0.431067	132.717	3	882	1.0432	0.0610218
Q9NS69	2	2	12.8999	0.442244	0.354339	0.142676	1.17235	0.102265	CF42	PF44	15521.7	Mitochondrial import receptor subunit TOM22 homolog OS=Homo sapiens OX=9606 GN=TOMM22 PE=1 SV=3	144.021	184.113	118.526	148.887	2.17286	0.222071	3	1146	110.461	165.872	104.664	126.999	2.1038	0.266062	33.7895	3	1188	0.85299	-0.229399
P28482;P28482-2;E9PBK7;E9PJF0;E9PQW4;P27361;P27361-2;P27361-3;B3KR49;H0YDH9	5	1	22.5473	0.0365876	1.43667	0.0234147	1.20909	0.6434	CF42	PF44	41789	Mitogen-activated protein kinase 1 OS=Homo sapiens OX=9606 GN=MAPK1 PE=1 SV=3	1273.1	1074.32	1215.51	1187.64	3.07468	0.0861193	3	396	918.616	999.373	1028.79	982.261	2.99223	0.0580777	57.0475	3	463	0.82707	-0.273919
Q99683;Q99683-2	5	1	19.3533	0.243911	0.612769	0.0916676	1.24037	0.185341	PF44	CF42	155849	Mitogen-activated protein kinase kinase kinase 5 OS=Homo sapiens OX=9606 GN=MAP3K5 PE=1 SV=1	128.164	121.861	85.9294	111.985	2.04916	0.203452	3	1229	122.485	126.16	168.063	138.903	2.14271	0.182291	25.3207	3	1154	1.24037	0.310772
P26038;A0A2R8Y5S7;A0A2R8Y7M3;P35241;P35241-5;P35241-4;V9GZ54;E9PNV3;E9PQ82;A0A2R8Y5P0;P35241-3	37	20	292.423	0.0732486	1.1352	0.0387089	1.14536	0.45234	PF44	CF42	67934.2	Moesin OS=Homo sapiens OX=9606 GN=MSN PE=1 SV=3	3203.73	3015.69	2857.46	3025.63	3.48082	0.0572925	3	179	3586.7	3647.28	3162.3	3465.43	3.53976	0.0762556	264.258	3	155	1.14536	0.195798
A0A0C4DFN3;E7EWX8;H7C599;Q99685;Q99685-2;H7C4E0;C9J8Q3;H7C5K5	3	1	16.4475	0.0107024	1.97052	0.0101028	1.48703	0.913563	PF44	CF42	34520.7	Monoglyceride lipase OS=Homo sapiens OX=9606 GN=MGLL PE=1 SV=1	349.439	369.373	385.758	368.19	2.56607	0.0493996	3	800	567.59	610.499	464.438	547.509	2.73839	0.137116	75.0725	3	667	1.48703	0.572432
Q9UKD2	7	2	30.5866	0.260206	0.584682	0.0963624	1.07241	0.174664	PF44	CF42	27674.6	mRNA turnover protein 4 homolog OS=Homo sapiens OX=9606 GN=MRTO4 PE=1 SV=2	1344.7	1377.97	1567.67	1430.11	3.15537	0.0841093	3	347	1489.12	1495.48	1616.38	1533.66	3.18573	0.0467549	71.7061	3	323	1.07241	0.100852
O95255;A0A0G2JMG3;A0A1W2PPQ8;A0A1W2PQX7	4	2	13.6336	0.0617511	1.20936	0.03401	1.52735	0.498537	PF44	CF42	166503	Multidrug resistance-associated protein 6 OS=Homo sapiens OX=9606 GN=ABCC6 PE=1 SV=2	227.363	154.591	124.735	168.896	2.22762	0.312549	3	1093	249.553	257.878	266.46	257.964	2.41156	0.0327709	8.45372	3	944	1.52735	0.611034
P22234;E9PBS1;P22234-2;D6RF62	9	3	48.8908	0.0743009	1.12901	0.0390899	1.27996	0.44854	CF42	PF44	47820.6	Multifunctional protein ADE2 OS=Homo sapiens OX=9606 GN=PAICS PE=1 SV=3	173.21	213.322	164.188	183.574	2.26381	0.142477	3	1066	161.975	135.506	132.783	143.422	2.15661	0.112435	16.1256	3	1147	0.781276	-0.356095
C9J5M0;C9JC07;C9JJV6;C9JZL8;Q96S97	2	2	12.4093	0.111612	0.952291	0.0521938	1.14747	0.345364	PF44	CF42	26924.4	Myeloid-associated differentiation marker (Fragment) OS=Homo sapiens OX=9606 GN=MYADM PE=1 SV=1	583.994	586.996	488.154	553.048	2.74276	0.101655	3	658	661.868	647.316	594.63	634.605	2.8025	0.0557441	35.3755	3	613	1.14747	0.198453
Q9NZM1;Q9NZM1-6;Q9NZM1-2;Q9NZM1-3;Q9NZM1-5;H0YD14;Q9NZM1-7;Q9NZM1-8;Q9NZM1-4	27	14	154.337	0.0156843	1.80454	0.0130913	1.13113	0.84886	PF44	CF42	236249	Myoferlin OS=Homo sapiens OX=9606 GN=MYOF PE=1 SV=1	1316.2	1324.02	1298.55	1312.92	3.11824	0.00993767	3	368	1560.48	1407.6	1487.19	1485.09	3.17175	0.0514845	76.4592	3	330	1.13113	0.177768
Q5VU43;A0A075B749;A0A087WX83;A0A0A0MRM1;Q5VU43-4;A0A087WVF8;Q5VU43-3;Q5VU43-6;Q5VU43-7;E9PQG4;Q5VU43-13;Q5VU43-2;H0YCY0;H0YCH7	16	1	62.2401	0.0435434	1.36108	0.0266391	1.54709	0.595333	PF44	CF42	266472	Myomegalin OS=Homo sapiens OX=9606 GN=PDE4DIP PE=1 SV=3	131.464	135.694	167.547	144.902	2.16107	0.136127	3	1157	178.939	217.751	275.837	224.176	2.35059	0.217542	48.7675	3	999	1.54709	0.629557
P54296;A0A0J9YVV7;E7EWH9	9	1	33.0868	0.845556	0.0728577	0.235713	1.00954	0.0530692	CF42	PF44	166436	Myomesin-2 OS=Homo sapiens OX=9606 GN=MYOM2 PE=1 SV=2	1252.35	1408.29	1297.51	1319.38	3.12037	0.0608157	3	367	1246.73	1359.23	1314.77	1306.91	3.11625	0.0433521	56.6573	3	370	0.990545	-0.0137049
P08590	4	1	12.8372	0.0207684	1.6826	0.0158878	1.26273	0.788572	CF42	PF44	22103.2	Myosin light chain 3 OS=Homo sapiens OX=9606 GN=MYL3 PE=1 SV=3	668.115	693.65	601.688	654.484	2.8159	0.0725339	3	589	558.586	475.583	520.759	518.309	2.71459	0.0801753	41.5556	3	700	0.791936	-0.336545
P60660;B7Z6Z4;F8W1R7;G3V1V0;G8JLA2;J3KND3;P60660-2;F8VPF3;G3V1Y7;F8VZU9;F8W180;H0YI43;F8W1I5;P14649;F8VXL3;P05976;P05976-2	15	12	106.458	0.0125111	1.90271	0.0112461	1.06584	0.889697	CF42	PF44	17101.2	Myosin light polypeptide 6 OS=Homo sapiens OX=9606 GN=MYL6 PE=1 SV=2	11317	11500.6	11266.3	11361.3	4.05543	0.0108521	3	47	10627.3	10428.7	10922.5	10659.5	4.02774	0.0233109	248.483	3	55	0.93823	-0.0919858
O14950;J3QRS3;P19105;J3KTJ1	12	7	82.5344	0.00213645	2.67031	0.00368062	1.17753	0.998868	PF44	CF42	19836.2	Myosin regulatory light chain 12B OS=Homo sapiens OX=9606 GN=MYL12B PE=1 SV=2	4149.85	4202.53	3929.76	4094.05	3.61215	0.0353427	3	130	4864.85	4879.62	4718.1	4820.86	3.68312	0.0185225	89.2942	3	114	1.17753	0.235762
P24844;P24844-2	6	2	32.0878	0.000700389	3.15466	0.00181719	1.18262	0.999998	PF44	CF42	19884.3	Myosin regulatory light polypeptide 9 OS=Homo sapiens OX=9606 GN=MYL9 PE=1 SV=4	1406.65	1370.23	1341.61	1372.83	3.13762	0.0237459	3	360	1659.78	1611.49	1599.35	1623.54	3.21046	0.019689	31.9659	3	314	1.18262	0.241992
P35580;P35580-2;P35580-3;P35580-4;P35580-5;E7ERA5	32	2	261.78	0.000128165	3.89223	0.000563925	7.7775	1	CF42	PF44	229969	Myosin-10 OS=Homo sapiens OX=9606 GN=MYH10 PE=1 SV=3	212.779	228.403	173.752	204.978	2.31171	0.137324	3	1026	28.654	29.7048	20.707	26.3553	1.42087	0.186669	4.9197	3	1457	0.128576	-2.95931
P35749;P35749-2;P35749-3;P35749-4	28	1	186.187	0.00209813	2.67817	0.00364376	1.15844	0.998949	PF44	CF42	228195	Myosin-11 OS=Homo sapiens OX=9606 GN=MYH11 PE=1 SV=3	1154.43	1115.87	1142.96	1137.76	3.05605	0.0174008	3	409	1353.46	1327.71	1272.91	1318.03	3.11992	0.0312118	41.1379	3	369	1.15844	0.212188
Q9UKX3	12	1	68.6955	0.0795531	1.09934	0.0409533	1.88745	0.430488	CF42	PF44	224746	Myosin-13 OS=Homo sapiens OX=9606 GN=MYH13 PE=2 SV=2	116.324	103.001	80.3431	99.8893	1.99952	0.182113	3	1264	28.7416	59.338	70.6895	52.923	1.72364	0.409977	21.6972	3	1379	0.529817	-0.916435
Q7Z406;Q7Z406-2;Q7Z406-6;Q7Z406-4;Q7Z406-5;M0QY43;A0A0C4DFM8;A1L2Z2	23	2	152.435	0.0206472	1.68514	0.0158232	1.18419	0.789926	PF44	CF42	228840	Myosin-14 OS=Homo sapiens OX=9606 GN=MYH14 PE=1 SV=2	3973.91	3591.01	3436.49	3667.14	3.56433	0.0754481	3	152	4481.46	4299.83	4246.47	4342.59	3.63775	0.0283684	123.193	3	126	1.18419	0.243901
Q9Y623;J3QLR0	25	1	142.128	0.0445538	1.35111	0.026951	1.45995	0.588957	CF42	PF44	224041	Myosin-4 OS=Homo sapiens OX=9606 GN=MYH4 PE=2 SV=2	130.252	158.071	149.781	146.035	2.16446	0.0978039	3	1152	88.1064	86.2514	125.725	100.027	2.00012	0.222675	22.2736	3	1251	0.684957	-0.545914
A7E2Y1;A0A087X0T3;A7E2Y1-3;Q5JW45;Q5JW46;Q5JW47;Q5JW48;Q5JW49	20	2	102.496	0.0147651	1.83076	0.0126932	1.203	0.860479	PF44	CF42	227100	Myosin-7B OS=Homo sapiens OX=9606 GN=MYH7B PE=1 SV=4	151.033	172.916	156.513	160.154	2.20454	0.0711003	3	1117	186.074	199.629	192.294	192.666	2.2848	0.035216	6.78493	3	1055	1.203	0.26664
P35579;P35579-2;Q5BKV1;B1AH99;A0A2R8Y4C3	153	97	1235.5	0.00116045	2.93537	0.00240288	1.28512	0.999941	PF44	CF42	227787	Myosin-9 OS=Homo sapiens OX=9606 GN=MYH9 PE=1 SV=4	17362.6	16015.8	15840.1	16406.1	4.21501	0.0507693	3	29	21458.6	20795.1	20997.8	21083.9	4.32395	0.0161281	340.043	3	26	1.28512	0.361903
C9JL85;P58546	1	1	8.1734	0.00245764	2.60948	0.00400912	1.32647	0.998037	CF42	PF44	5761.52	Myotrophin OS=Homo sapiens OX=9606 GN=MTPN PE=1 SV=1	4406.23	4018.12	4211.01	4211.79	3.62447	0.0460744	3	124	2998.68	3350.67	3176.17	3175.17	3.50177	0.0554304	176.001	3	171	0.753878	-0.407597
Q9NPC6	1	1	4.2198	0.053772	1.26944	0.0308941	1.38559	0.53668	CF42	PF44	29898	Myozenin-2 OS=Homo sapiens OX=9606 GN=MYOZ2 PE=1 SV=1	171.07	142.919	135.888	149.959	2.17597	0.12415	3	1143	92.5552	102.218	129.909	108.227	2.03434	0.179144	19.3883	3	1230	0.721713	-0.470503
P29966	4	3	20.6291	0.00143128	2.84428	0.00281546	1.75922	0.999818	CF42	PF44	31725.8	Myristoylated alanine-rich C-kinase substrate OS=Homo sapiens OX=9606 GN=MARCKS PE=1 SV=4	472.781	488.376	505.949	489.036	2.68934	0.033931	3	707	258.916	256.915	318.124	277.985	2.44402	0.1251	34.7759	3	919	0.568435	-0.814933
C9JEV6;H7C3G9;Q9UJ70;Q9UJ70-2;H7C286;E9PPU6;H0YF44	5	2	26.6326	0.0795875	1.09916	0.0409533	1.19978	0.430375	PF44	CF42	32302.9	N-acetyl-D-glucosamine kinase OS=Homo sapiens OX=9606 GN=NAGK PE=1 SV=3	263.912	282.827	332.984	293.241	2.46722	0.121723	3	902	379.019	343.98	332.476	351.825	2.54633	0.0689065	24.243	3	821	1.19978	0.262771
F6S8M0;H7C3P4;P15586;P15586-2;F5H4C6;H0YFA9	4	2	25.7807	0.000893379	3.04896	0.00204667	1.42937	0.999988	CF42	PF44	66565.5	N-acetylglucosamine-6-sulfatase OS=Homo sapiens OX=9606 GN=GNS PE=1 SV=1	1141.87	1090.48	1022.62	1084.99	3.03543	0.0551289	3	426	794.577	731.381	751.241	759.066	2.88028	0.042574	32.3165	3	546	0.699607	-0.515382
Q5FWF5;Q5FWF5-2	1	1	7.1218	0.0609382	1.21511	0.0337783	1.33397	0.502168	PF44	CF42	96180.5	N-acetyltransferase ESCO1 OS=Homo sapiens OX=9606 GN=ESCO1 PE=1 SV=3	178.999	143.56	185.039	169.199	2.2284	0.132441	3	1092	247.763	192.348	237.009	225.707	2.35354	0.130195	29.3858	3	997	1.33397	0.415726
Q86W24	3	2	10.9333	0.73877	0.131491	0.212264	1.05224	0.0591053	PF44	CF42	127699	NACHT_ LRR and PYD domains-containing protein 14 OS=Homo sapiens OX=9606 GN=NLRP14 PE=1 SV=1	32.0642	21.6519	32.6697	28.7953	1.45932	0.215096	3	1470	24.832	32.1218	33.945	30.2996	1.48144	0.159146	4.82205	3	1451	1.05224	0.0734651
Q7RTR0;Q7RTR0-2	3	1	12.9003	0.00114961	2.93945	0.00239855	1.81671	0.999944	PF44	CF42	115822	NACHT_ LRR and PYD domains-containing protein 9 OS=Homo sapiens OX=9606 GN=NLRP9 PE=1 SV=1	415.365	456.505	416.925	429.598	2.63306	0.0542709	3	746	772.674	697.146	871.551	780.457	2.89235	0.112066	87.4624	3	539	1.81671	0.861331
P15559;B4DLR8;P15559-2;P15559-3;H3BRK3;H3BNV2	9	6	69.9595	4.97652e-06	5.30307	8.57344e-05	2.82279	1	CF42	PF44	30924.7	NAD(P)H dehydrogenase [quinone] 1 OS=Homo sapiens OX=9606 GN=NQO1 PE=1 SV=1	892.723	871.947	921.125	895.265	2.95195	0.0275751	3	479	304.855	312.754	333.859	317.156	2.50127	0.0472779	14.9945	3	871	0.354259	-1.49712
Q9P032	2	1	7.6359	0.350031	0.455893	0.121187	1.12242	0.130848	CF42	PF44	20323.5	NADH dehydrogenase [ubiquinone] 1 alpha subcomplex assembly factor 4 OS=Homo sapiens OX=9606 GN=NDUFAF4 PE=1 SV=1	181.351	208.294	254.161	214.602	2.33163	0.171539	3	1012	191.798	198.417	183.373	191.196	2.28148	0.0394353	7.53988	3	1057	0.890932	-0.166612
P00387;P00387-2;P00387-3;B1AHF3	5	4	37.2906	0.364594	0.43819	0.124779	1.04194	0.125485	CF42	PF44	34463	NADH-cytochrome b5 reductase 3 OS=Homo sapiens OX=9606 GN=CYB5R3 PE=1 SV=3	3375.01	3113.84	3004.38	3164.41	3.50029	0.0601769	3	173	3046.01	2932.06	3133.02	3037.03	3.48245	0.0331846	100.783	3	179	0.959746	-0.0592752
E9PAV3;E9PAV3-2;F8VZJ2;H0YHX9;Q13765;F8VNW4;F8W0W4;F8W1N5;F8VZ58;Q9BZK3	7	2	48.0247	0.0119825	1.92145	0.0108649	1.48001	0.896654	CF42	PF44	206106	Nascent polypeptide-associated complex subunit alpha_ muscle-specific form OS=Homo sapiens OX=9606 GN=NACA PE=1 SV=1	1657.2	1793.97	1679.3	1710.16	3.23304	0.0429341	3	303	983.75	1334.46	1148.3	1155.5	3.06277	0.151851	175.464	3	401	0.675671	-0.565607
P08473;C9JR96;C9J9X7;C9IYX7;C9JDZ3	8	1	48.5563	2.18168e-05	4.66121	0.000187858	2.1558	1	PF44	CF42	86198.4	Neprilysin OS=Homo sapiens OX=9606 GN=MME PE=1 SV=2	441.715	403.52	410.836	418.69	2.62189	0.0484199	3	751	916.844	868.4	922.588	902.611	2.9555	0.032978	29.7663	3	488	2.1558	1.10822
A0A0C4DGK3;Q8WXH0-7;G3V4T3;G3V3D4	5	1	19.1113	0.810979	0.0909907	0.228739	1.03283	0.0546416	CF42	PF44	411581	Nesprin-2 OS=Homo sapiens OX=9606 GN=SYNE2 PE=1 SV=1	502.713	682.927	606.441	597.36	2.77624	0.151415	3	623	659.76	598.118	477.229	578.369	2.76221	0.160545	92.8542	3	648	0.968209	-0.0466094
P48681	21	12	105.49	0.0467086	1.3306	0.0277096	1.48219	0.575819	CF42	PF44	177895	Nestin OS=Homo sapiens OX=9606 GN=NES PE=1 SV=2	879.928	668.109	582.306	710.114	2.85133	0.215729	3	556	517.647	427.327	492.322	479.099	2.68043	0.0972434	46.5892	3	723	0.674678	-0.567728
A0A0D9SF28;F5GXV7;Q5T321;Q8NFP9	6	1	23.2413	0.296519	0.527948	0.106845	1.36522	0.154322	CF42	PF44	330316	Neurobeachin OS=Homo sapiens OX=9606 GN=NBEA PE=1 SV=1	144.497	130.984	106.816	127.432	2.10528	0.149802	3	1191	45.9279	120.528	113.569	93.3416	1.97008	0.441482	41.2086	3	1265	0.73248	-0.449139
E9PJC6;E9PJZ0;E9PKR9;E9PLK4;Q09666-2;E9PQE3	2	1	13.1218	0.136463	0.864985	0.0596689	1.27751	0.298958	CF42	PF44	14645.3	Neuroblast differentiation-associated protein AHNAK OS=Homo sapiens OX=9606 GN=AHNAK PE=1 SV=1	1089.52	834.657	771.04	898.406	2.95347	0.187599	3	477	625.888	806.927	676.926	703.247	2.84711	0.132735	93.3454	3	574	0.782772	-0.353337
Q9BYT8	2	1	7.4309	0.139802	0.854486	0.0608787	1.17811	0.29361	CF42	PF44	81393.3	Neurolysin_ mitochondrial OS=Homo sapiens OX=9606 GN=NLN PE=1 SV=1	586.937	454.597	577.167	539.567	2.73205	0.136681	3	667	437.298	463.224	473.461	457.994	2.66086	0.0406996	18.6402	3	737	0.848818	-0.236472
Q8IVL0;Q8IVL0-2;Q8IVL0-3;A0A2R8YFX5;A0A1B0GTC4;F8VZV4;H0YHX7	7	1	29.6667	0.958964	0.0181979	0.259255	1.00176	0.0502129	PF44	CF42	257131	Neuron navigator 3 OS=Homo sapiens OX=9606 GN=NAV3 PE=1 SV=3	549.671	552.798	611.015	571.162	2.75676	0.0604903	3	645	544.299	581.246	590.962	572.169	2.75752	0.0430293	24.62	3	653	1.00176	0.00254305
Q14697;Q14697-2;F5H6X6;E9PKU7;E9PNH1	9	2	57.4675	0.0117008	1.93178	0.0106543	1.07919	0.900371	CF42	PF44	107330	Neutral alpha-glucosidase AB OS=Homo sapiens OX=9606 GN=GANAB PE=1 SV=3	575.647	576.371	602.913	584.977	2.76714	0.0265607	3	633	550.565	535.525	540.059	542.05	2.73404	0.0142337	7.7154	3	671	0.926617	-0.109955
Q15758;M0QXM4;M0QX44;Q15758-2;Q15758-3	5	2	28.5892	0.0131899	1.87976	0.0116649	1.38531	0.880808	PF44	CF42	57054.6	Neutral amino acid transporter B(0) OS=Homo sapiens OX=9606 GN=SLC1A5 PE=1 SV=2	458.689	458.126	573.273	496.696	2.69609	0.133519	3	700	715.65	661.195	687.392	688.079	2.83764	0.0395796	27.2339	3	583	1.38531	0.470211
B1AHD1;P55769	2	1	12.8611	0.0968052	1.0141	0.0468466	12.7398	0.380171	PF44	CF42	14855.3	NHP2-like protein 1 OS=Homo sapiens OX=9606 GN=SNU13 PE=1 SV=1		84.6875	30.107	57.3972	1.75889	0.672405	2	1384	138.226	520.868	803.36	487.485	2.68796	0.684783	333.821	3	718	8.49317	3.0863
Q96TA1;Q96TA1-2	9	5	52.7249	0.061832	1.20879	0.0340112	1.13584	0.498178	CF42	PF44	84651.3	Niban-like protein 1 OS=Homo sapiens OX=9606 GN=FAM129B PE=1 SV=3	836.29	921.678	905.652	887.873	2.94835	0.0511173	3	481	836.286	728.583	780.196	781.688	2.89303	0.0689113	53.8672	3	537	0.880405	-0.18376
P43490;A0A0C4DFS8	4	2	19.2341	0.0149014	1.82677	0.012734	1.13399	0.858745	PF44	CF42	55806.3	Nicotinamide phosphoribosyltransferase OS=Homo sapiens OX=9606 GN=NAMPT PE=1 SV=1	541.716	539.511	497.357	526.195	2.72115	0.0475078	3	678	612.665	588.075	589.352	596.697	2.77575	0.0231989	13.8427	3	630	1.13399	0.181403
A0A087X117;A0A0G2JN29;Q15155;A0A087WW46;A0A0G2JP90;H3BUC9;J3KN36;P69849;Q5JPE7;Q5JPE7-2	2	1	8.7562	0.0293494	1.5324	0.0201605	1.0579	0.702655	PF44	CF42	140553	Nodal modulator 1 OS=Homo sapiens OX=9606 GN=NOMO1 PE=1 SV=1	10875.1	11088.6	10493	10818.9	4.03418	0.0278908	3	48	11374.8	11394.4	11566.6	11445.2	4.05863	0.00921906	105.514	3	50	1.0579	0.0811995
Q15233;Q15233-2;C9IZL7;C9JYS8;H7C367;C9J4X2	13	6	71.6446	0.000614622	3.21139	0.00162587	1.19433	0.999999	PF44	CF42	54345.8	Non-POU domain-containing octamer-binding protein OS=Homo sapiens OX=9606 GN=NONO PE=1 SV=4	2851.17	2752.67	2731.54	2778.46	3.4438	0.0229801	3	189	3400.22	3291.39	3263.54	3318.38	3.52093	0.0217653	72.2255	3	162	1.19433	0.256196
P22307;P22307-2;P22307-4;P22307-7;P22307-8;P22307-6;H0YF61	5	4	30.1659	0.57483	0.240461	0.174719	1.0986	0.0766379	PF44	CF42	59678.1	Non-specific lipid-transfer protein OS=Homo sapiens OX=9606 GN=SCP2 PE=1 SV=2	601.618	279.596	277.444	386.22	2.58683	0.482998	3	784	423.945	467.982	380.981	424.303	2.62768	0.102525	43.5018	3	760	1.0986	0.135672
E7EMS2;G3V2V8;G3V3D1;G3V3E8;H0YIZ1;J3KMY5;P61916;P61916-2	1	1	6.4187	0.0697405	1.15651	0.0373129	1.30792	0.465492	PF44	CF42	22954.5	NPC intracellular cholesterol transporter 2 OS=Homo sapiens OX=9606 GN=NPC2 PE=1 SV=1	355.494	330.492	250.926	312.304	2.49458	0.174847	3	872	378.614	431.66	415.131	408.468	2.61116	0.0664511	27.1432	3	775	1.30792	0.387273
Q14980;Q14980-2;A0A087WY61;Q14980-3;Q14980-4;H0YFY6;Q14980-5;F5H4J1;F5H6Y5;K4DIE0	12	1	47.5963	0.0404799	1.39276	0.0251943	2.19883	0.615562	CF42	PF44	239343	Nuclear mitotic apparatus protein 1 OS=Homo sapiens OX=9606 GN=NUMA1 PE=1 SV=2	190.637	156.189	186.297	177.708	2.24971	0.105576	3	1080	43.3677	92.6883	106.402	80.8193	1.90751	0.410186	33.1509	3	1295	0.454787	-1.13674
H3BVG0;Q8N1F7;Q8N1F7-2;H3BM93;H3BMX0;H3BP95;H3BRI8;H3BNG7;H3BNN5;H3BV11	4	2	26.8847	0.322079	0.492038	0.113703	1.05744	0.142293	CF42	PF44	100353	Nuclear pore complex protein Nup93 OS=Homo sapiens OX=9606 GN=NUP93 PE=1 SV=1	181.657	179.162	188.554	183.124	2.26275	0.0265648	3	1068	179.712	156.716	183.101	173.177	2.23849	0.0828943	14.3554	3	1084	0.945677	-0.0805802
Q9Y618;C9JFD3;Q9Y618-4;Q9Y618-5;C9J0Q5;C9JE98;C9J7T7;C9JQE8;C9J330;H7C1J7;Q9Y618-2;H7C184	15	1	62.0873	0.648785	0.187899	0.192842	1.11507	0.0672547	CF42	PF44	274399	Nuclear receptor corepressor 2 OS=Homo sapiens OX=9606 GN=NCOR2 PE=1 SV=3	50.2375	82.5	96.4789	76.4055	1.88312	0.31039	3	1330	113.504	30.1509	61.907	68.5208	1.83582	0.613951	42.0684	3	1338	0.896804	-0.157135
P61970;H3BRV9	2	1	13.9706	0.0183733	1.73581	0.0146716	1.37051	0.816091	PF44	CF42	14649.6	Nuclear transport factor 2 OS=Homo sapiens OX=9606 GN=NUTF2 PE=1 SV=1	1257.48	996.57	1282.44	1178.83	3.07145	0.134315	3	397	1582.45	1682.06	1582.29	1615.6	3.20833	0.0356267	57.5585	3	318	1.37051	0.454714
P67809;H0Y449;C9J5V9;P16989-2;Q9Y2T7	7	5	42.9171	0.0220093	1.65739	0.0162628	1.15503	0.774945	CF42	PF44	35924.2	Nuclease-sensitive element-binding protein 1 OS=Homo sapiens OX=9606 GN=YBX1 PE=1 SV=3	2540.25	2353.98	2256.46	2383.56	3.37723	0.0604934	3	224	2076.9	1991.49	2122.52	2063.63	3.31463	0.0322323	66.5157	3	256	0.865778	-0.207931
Q02818;C9JKZ2;H7BZI1	3	1	10.266	0.44923	0.347531	0.144375	1.18245	0.100539	PF44	CF42	53879.4	Nucleobindin-1 OS=Homo sapiens OX=9606 GN=NUCB1 PE=1 SV=4	179.129	118.333	94.9072	130.79	2.11657	0.33237	3	1185	142.616	193.41	127.93	154.652	2.18935	0.222172	34.3592	3	1116	1.18245	0.241774
O00567;H0Y653;H0YDU4;Q5JXT2	6	1	36.7786	0.448378	0.348355	0.14433	1.04867	0.100747	PF44	CF42	66449.2	Nucleolar protein 56 OS=Homo sapiens OX=9606 GN=NOP56 PE=1 SV=4	331.447	316.214	369.512	339.057	2.53027	0.0809662	3	844	331.552	370.762	364.36	355.558	2.55091	0.0591595	21.0346	3	816	1.04867	0.0685555
Q9Y2X3;H7BZ72	9	3	57.2691	4.93773e-05	4.30647	0.000337564	3.47973	1	PF44	CF42	60091.5	Nucleolar protein 58 OS=Homo sapiens OX=9606 GN=NOP58 PE=1 SV=1	36.9054	33.3329	32.4904	34.2429	1.53457	0.0684509	3	1449	116.858	131.515	109.095	119.156	2.07612	0.0955489	11.3852	3	1204	3.47973	1.79898
Q9NR30;Q9NR30-2	11	3	60.8732	0.00475414	2.32293	0.005867	1.70175	0.984152	CF42	PF44	87857.8	Nucleolar RNA helicase 2 OS=Homo sapiens OX=9606 GN=DDX21 PE=1 SV=5	131.608	150.105	122.301	134.671	2.12927	0.105091	3	1177	88.4834	79.9599	68.9671	79.1368	1.89838	0.123636	9.78416	3	1299	0.58763	-0.76702
P19338	17	5	130.022	0.000175034	3.75688	0.000704544	3.05262	1	PF44	CF42	76671.5	Nucleolin OS=Homo sapiens OX=9606 GN=NCL PE=1 SV=3	272.935	285.579	329.956	296.157	2.47152	0.101116	3	899	855.333	1014.81	842.012	904.052	2.95619	0.106355	96.1508	3	485	3.05262	1.61005
P06748;P06748-2;P06748-3;E5RI98;E5RGW4	11	7	72.3401	0.00612689	2.21276	0.00705958	1.2571	0.970604	CF42	PF44	32746.2	Nucleophosmin OS=Homo sapiens OX=9606 GN=NPM1 PE=1 SV=2	9672.24	9584.35	9674.42	9643.67	3.98424	0.0053284	3	54	7940.56	8051.71	7021.77	7671.35	3.88487	0.0736881	565.287	3	68	0.79548	-0.330102
P15531;E7ERL0;P15531-2;E5RHP0;C9K028	11	2	61.7381	0.00745452	2.12758	0.00805294	1.24172	0.955273	CF42	PF44	17319.8	Nucleoside diphosphate kinase A OS=Homo sapiens OX=9606 GN=NME1 PE=1 SV=1	1112.99	1131.28	1235.94	1160.07	3.06448	0.0571831	3	403	957.424	882.085	963.227	934.245	2.97046	0.0484511	45.2652	3	480	0.805337	-0.312336
P22392	10	1	93.2382	0.45328	0.343634	0.145109	1.05456	0.0995615	CF42	PF44	17412.1	Nucleoside diphosphate kinase B OS=Homo sapiens OX=9606 GN=NME2 PE=1 SV=1	757.099	718.384	662.657	712.713	2.85291	0.0666127	3	554	613.894	676.288	737.328	675.836	2.82984	0.0913215	61.7184	3	586	0.948259	-0.0766476
F5H4R6;F8VY35;F8W020;F8W0J6;H0YIV4;P55209;P55209-2;B7Z9C2;F8VUX1;F8VV59;F8VXI6;F8W118;H0YHC3;F8VRJ2;F8VVB5;F8W543;H0YH88;P55209-3	5	4	37.8443	0.000269705	3.56911	0.000936778	1.43094	1	CF42	PF44	44912	Nucleosome assembly protein 1-like 1 OS=Homo sapiens OX=9606 GN=NAP1L1 PE=1 SV=1	1458.44	1436.92	1436.69	1444.02	3.15957	0.00865071	3	340	1028.37	951.758	1047.29	1009.14	3.00395	0.0501288	50.5869	3	454	0.698843	-0.51696
Q99733;Q99733-2;C9JZI7;A8MXH2;C9J6D1;E9PJJ2;E9PKT8;E9PNJ7;E9PNW0;E9PS34;C9J1B1;E9PKI2;E9PP22;H0YCI4	7	1	45.8977	0.326143	0.486593	0.114668	1.90164	0.140526	CF42	PF44	42994.6	Nucleosome assembly protein 1-like 4 OS=Homo sapiens OX=9606 GN=NAP1L4 PE=1 SV=1	268.719	249.494	266.202	261.472	2.41742	0.0399616	3	941		213.298	199.195	206.247	2.31439	0.0483513	9.9723	2	1024	0.788792	-0.342283
A0A2R8Y7Q1;E7ETD6;E9PE19;F5GXF5;Q12830;Q12830-2;Q12830-4;A0A0A0MR81;F5H176	9	1	34.8113	0.175864	0.754823	0.0726908	1.2837	0.245459	CF42	PF44	333920	Nucleosome-remodeling factor subunit BPTF OS=Homo sapiens OX=9606 GN=BPTF PE=1 SV=1	83.8257	89.2651	65.9081	79.6663	1.90127	0.153408	3	1324	73.9343	48.1311	64.1146	62.06	1.79281	0.209857	13.0237	3	1353	0.779	-0.360306
J3KQ32;Q9NTK5;Q9NTK5-3;C9JTK6;Q9NTK5-2;C9JCJ9	7	5	39.1321	7.47841e-06	5.12619	0.000104222	7.28757	1	PF44	CF42	47166.2	Obg-like ATPase 1 OS=Homo sapiens OX=9606 GN=OLA1 PE=1 SV=1	388.73	317.756	321.731	342.739	2.53496	0.116354	3	839	2537.46	2430.7	2525.04	2497.73	3.39755	0.0233753	58.3853	3	220	7.28757	2.86544
O75147;A6NN50;O75147-4;H0Y684	6	1	28.0831	0.0815435	1.08861	0.0416225	1.84644	0.42402	PF44	CF42	210026	Obscurin-like protein 1 OS=Homo sapiens OX=9606 GN=OBSL1 PE=1 SV=4	205.964	292.79	506.008	334.921	2.52494	0.46099	3	850	478.332	705.627	671.276	618.412	2.79128	0.198124	122.522	3	619	1.84644	0.884749
H7C579;Q9NQR4;F8WF70	3	2	16.8932	0.00911456	2.04026	0.00902435	1.42482	0.934372	CF42	PF44	29032.9	Omega-amidase NIT2 (Fragment) OS=Homo sapiens OX=9606 GN=NIT2 PE=1 SV=8	233.906	262.667	232.939	243.171	2.38591	0.0694623	3	965	152.912	168.151	190.94	170.668	2.23215	0.112138	19.1383	3	1090	0.701843	-0.510781
Q13415	4	1	20.5801	0.000590175	3.22902	0.00158866	1.28524	0.999999	CF42	PF44	98433.4	Origin recognition complex subunit 1 OS=Homo sapiens OX=9606 GN=ORC1 PE=1 SV=2	3463.74	3498.69	3535.62	3499.35	3.54399	0.0102729	3	156	2658.67	2650.35	2859.16	2722.72	3.435	0.0434225	118.227	3	199	0.778065	-0.362037
P04181;P04181-2	11	5	57.9318	0.00203625	2.69117	0.00359427	1.35248	0.999072	PF44	CF42	48877.1	Ornithine aminotransferase_ mitochondrial OS=Homo sapiens OX=9606 GN=OAT PE=1 SV=1	225.018	247.57	225.581	232.723	2.36684	0.0552626	3	980	321.706	325.279	297.277	314.754	2.49797	0.0484203	15.2405	3	874	1.35248	0.43561
Q6IE36;A0A0G2JMS6	8	1	31.128	0.000342931	3.46479	0.00109713	1.34136	1	PF44	CF42	162619	Ovostatin homolog 2 OS=Homo sapiens OX=9606 GN=OVOS2 PE=2 SV=2	1352.66	1449.95	1368.99	1390.53	3.14318	0.0374659	3	356	1889.77	1811.52	1894.32	1865.2	3.27073	0.0249565	46.5489	3	287	1.34136	0.423695
P30559	1	1	4.8688	0.144675	0.839606	0.0621847	2.34307	0.286118	CF42	PF44	43570	Oxytocin receptor OS=Homo sapiens OX=9606 GN=OXTR PE=2 SV=2	177.584	98.2584	55.8418	110.561	2.0436	0.558935	3	1231	65.5341	52.7921	23.2333	47.1865	1.67382	0.459886	21.7004	3	1400	0.42679	-1.2284
Q8WX93;Q8WX93-2;Q8WX93-3;Q8WX93-5;Q8WX93-9;Q8WX93-8;Q8WX93-4;Q8WX93-7;H0Y952;Q8WX93-6;H0YA05;F8WA26	11	3	56.2956	0.0153262	1.81457	0.0129176	1.65845	0.853363	CF42	PF44	151933	Palladin OS=Homo sapiens OX=9606 GN=PALLD PE=1 SV=3	401.36	409.084	389.95	400.131	2.6022	0.024058	3	765	300.401	193.621	229.784	241.269	2.3825	0.225095	54.3083	3	969	0.602974	-0.729833
P55259;P55259-3;P55259-2;P55259-4	3	2	10.7754	0.0412538	1.38454	0.0254918	24.1244	0.610319	PF44	CF42	61134.4	Pancreatic secretory granule membrane major glycoprotein GP2 OS=Homo sapiens OX=9606 GN=GP2 PE=2 SV=3	22.1719		22.8772	22.5245	1.35266	0.0221383	2	1485	154.746	526.652	405.386	362.261	2.55902	0.523562	189.666	3	811	16.0829	4.00746
A0A1B0GTU4;F5GZ78;P49023;P49023-2;P49023-3;A0A1B0GU60;A0A1B0GV30;P49023-4;F5H836	5	2	26.742	0.00377166	2.42347	0.0049507	2.77329	0.991701	CF42	PF44	117845	Paxillin OS=Homo sapiens OX=9606 GN=PXN PE=1 SV=1	293.092	437.721	400.735	377.183	2.57655	0.199203	3	791	106.659	145.794	155.565	136.006	2.13356	0.19029	25.8805	3	1159	0.360583	-1.4716
B4DZ31;J3KQY3;Q9NWS1;Q9NWS1-2;Q9NWS1-7;A0A0C4DG30;B4DT40;Q9NWS1-6	3	1	13.5562	0.743566	0.128681	0.2135	1.14868	0.0587559	PF44	CF42	74167.6	PCNA-interacting partner OS=Homo sapiens OX=9606 GN=PARPBP PE=1 SV=1	67.298	43.0281	58.577	56.301	1.75052	0.218361	3	1391	38.9897	90.792	64.2347	64.6722	1.81072	0.400542	25.9039	3	1350	1.14868	0.199983
O00151	7	4	42.3238	0.000217381	3.66278	0.000817625	1.67034	1	PF44	CF42	36528	PDZ and LIM domain protein 1 OS=Homo sapiens OX=9606 GN=PDLIM1 PE=1 SV=4	548.286	499.53	557.971	535.262	2.72857	0.0585164	3	671	920.253	903.984	857.964	894.067	2.95137	0.0361353	32.3073	3	493	1.67034	0.740137
P50479;P50479-2	3	1	17.4317	0.0395207	1.40318	0.0248066	1.21298	0.622191	PF44	CF42	35911.3	PDZ and LIM domain protein 4 OS=Homo sapiens OX=9606 GN=PDLIM4 PE=1 SV=2	659.047	751.467	777.966	729.494	2.86302	0.0855804	3	548	829.024	874.439	951.11	884.858	2.94687	0.0697358	61.7063	3	497	1.21298	0.27855
Q96HC4;Q96HC4-4;Q96HC4-6;Q96HC4-7;H0Y8Y3;A0A0A0MSP3;Q96HC4-2;Q96HC4-3;H0YBI4;A0A0D9SFR4;H0Y929	10	4	55.2133	0.0452523	1.34436	0.027107	2.84042	0.584631	PF44	CF42	65142.8	PDZ and LIM domain protein 5 OS=Homo sapiens OX=9606 GN=PDLIM5 PE=1 SV=5	18.7884	26.6463	45.5428	30.3258	1.48181	0.453458	3	1464	94.7426	114.823	48.8477	86.1379	1.93519	0.392615	33.819	3	1283	2.84042	1.5061
Q9NR12;Q9NR12-2;D6RAN1;D6RF83;D6RH06;H7BYK4;Q9NR12-3;Q9NR12-4;Q9NR12-5;Q9NR12-6	5	4	31.3991	0.398176	0.399925	0.131715	1.04268	0.114441	CF42	PF44	50928.3	PDZ and LIM domain protein 7 OS=Homo sapiens OX=9606 GN=PDLIM7 PE=1 SV=1	364.859	355.223	372.871	364.318	2.56148	0.024254	3	806	379.261	341.915	327.043	349.407	2.54333	0.0769965	26.9031	3	828	0.959071	-0.0602904
O15018;O15018-2	7	1	27.7842	0.0614938	1.21117	0.0339552	8.94185	0.49968	CF42	PF44	304151	PDZ domain-containing protein 2 OS=Homo sapiens OX=9606 GN=PDZD2 PE=1 SV=4	83.6154	50.2747	111.679	81.8562	1.91305	0.375533	3	1315	19.71	7.75284		13.7314	1.13772	0.615741	8.455	2	1494	0.167751	-2.57561
B5MC47;B6ZDM2;H0YIY3;Q63HM2;H0YJ84	4	1	20.0696	7.08978e-05	4.14937	0.000436219	102.385	1	CF42	PF44	99856.3	Pecanex-like protein 4 OS=Homo sapiens OX=9606 GN=PCNX4 PE=1 SV=1	47.8393	33.4032	30.1664	37.1363	1.5698	0.253372	3	1441	0.681437	0.406701		0.544069	-0.264346	0.357064	0.194267	2	1522	0.0146506	-6.0929
P62937;C9J5S7;F8WE65;P62937-2;A0A0H2UH34;E5RIZ5;F5H284	26	19	166.051	0.260519	0.584161	0.0963952	1.04773	0.17447	PF44	CF42	18240.6	Peptidyl-prolyl cis-trans isomerase A OS=Homo sapiens OX=9606 GN=PPIA PE=1 SV=2	10792.8	10398.6	9914.62	10368.7	4.01572	0.0424216	3	51	10370.7	10884.4	11335.6	10863.6	4.03597	0.0444449	482.83	3	52	1.04773	0.0672657
P23284	20	14	115.782	0.0171679	1.76528	0.0138727	1.09172	0.830542	CF42	PF44	23799.6	Peptidyl-prolyl cis-trans isomerase B OS=Homo sapiens OX=9606 GN=PPIB PE=1 SV=2	8109.75	7911.52	7708.49	7909.92	3.89817	0.0253654	3	62	7492	7134.4	7109.7	7245.37	3.86006	0.0295286	213.946	3	77	0.915985	-0.126604
Q96AY3;K7ESG6;K7ELI6;C9JPC3;H0Y827;Q96AY3-2	13	8	78.5596	0.714949	0.145725	0.207332	1.01653	0.0609607	PF44	CF42	64758.4	Peptidyl-prolyl cis-trans isomerase FKBP10 OS=Homo sapiens OX=9606 GN=FKBP10 PE=1 SV=1	1781.71	1948.88	1964.73	1898.44	3.2784	0.0534132	3	276	2035.61	1903.68	1850.16	1929.82	3.28552	0.0494579	95.4449	3	275	1.01653	0.0236513
P62942;A0A087WTS4;A0A087WV48;A0A087WZM5;Q1JUQ3;Q1JUQ5;Q5W0X3	4	4	16.9705	3.36147e-06	5.47347	6.58077e-05	10.2599	1	PF44	CF42	12007.8	Peptidyl-prolyl cis-trans isomerase FKBP1A OS=Homo sapiens OX=9606 GN=FKBP1A PE=1 SV=2	319.967	394.226	364.192	359.462	2.55565	0.103919	3	815	3830.29	3593.68	3640.15	3688.04	3.5668	0.0339917	125.363	3	143	10.2599	3.35894
Q02790	4	1	25.4528	0.0866453	1.06225	0.0434432	5.80088	0.408293	PF44	CF42	52089.8	Peptidyl-prolyl cis-trans isomerase FKBP4 OS=Homo sapiens OX=9606 GN=FKBP4 PE=1 SV=3		22.2883	8.14472	15.2165	1.18231	0.657247	2	1500	54.8078	59.9346	61.7955	58.8459	1.76972	0.0614962	3.6188	3	1362	3.86725	1.95131
O60664;O60664-3;O60664-4;K7ERZ3;K7EL96;K7ER39;O60664-2	12	12	85.4559	7.55468e-05	4.12178	0.000450202	1.40647	1	CF42	PF44	47246.1	Perilipin-3 OS=Homo sapiens OX=9606 GN=PLIN3 PE=1 SV=3	3536.86	3365.29	3310.9	3404.35	3.53203	0.0346423	3	164	2402.71	2416.68	2442.06	2420.49	3.3839	0.00824085	19.9469	3	228	0.710999	-0.492081
A0A2R8Y3B3;A0A2R8Y6F8;A0A2R8YE77;A0A2R8YEK3;A0A2R8YFN5;A0A2U3TZM1;A0A2U3TZM4;A0A2U3TZN6;O14936;O14936-2;O14936-3;O14936-4;O14936-5;O14936-6;Q5JS72	1	1	3.9252	0.201126	0.696533	0.0799112	1.30354	0.21956	PF44	CF42	64048.1	Peripheral plasma membrane protein CASK (Fragment) OS=Homo sapiens OX=9606 GN=CASK PE=1 SV=1	328.941	449.158	465.491	414.53	2.61756	0.179892	3	753	621.232	410.658	589.176	540.355	2.73268	0.209971	113.459	3	674	1.30354	0.38243
Q8NEY8;F8VPY7;F8VWU8;F8W0Q9;Q8NEY8-2;Q8NEY8-8;Q8NEY8-9;F8VRK2	4	1	21.9778	0.313529	0.503722	0.111324	1.0588	0.146135	PF44	CF42	52851.2	Periphilin-1 OS=Homo sapiens OX=9606 GN=PPHLN1 PE=1 SV=2	3703.41	3497.47	3502.72	3567.87	3.55241	0.0329085	3	153	3487.31	4066.57	3779.09	3777.66	3.57722	0.0766704	289.634	3	141	1.0588	0.0824293
Q06830;A0A0A0MSI0;A0A0A0MRQ5	21	11	120.469	0.0651326	1.1862	0.0354008	1.12195	0.483987	CF42	PF44	22338.5	Peroxiredoxin-1 OS=Homo sapiens OX=9606 GN=PRDX1 PE=1 SV=1	4083.35	3955.9	3732.99	3924.08	3.59374	0.0451902	3	138	3693.04	3251.18	3548.42	3497.55	3.54376	0.0644108	225.28	3	150	0.891304	-0.166011
P32119;A6NIW5;P32119-2	4	2	30.489	0.0268717	1.57071	0.0188635	1.17893	0.725544	CF42	PF44	22063	Peroxiredoxin-2 OS=Homo sapiens OX=9606 GN=PRDX2 PE=1 SV=5	1521.51	1431.72	1411.64	1454.95	3.16285	0.0402102	3	335	1250.94	1136.56	1314.9	1234.13	3.09136	0.0732086	90.3492	3	384	0.848228	-0.237476
Q13162;H7C3T4;A6NG45	4	1	27.4127	0.00105563	2.97649	0.00229366	1.45117	0.999966	CF42	PF44	30768	Peroxiredoxin-4 OS=Homo sapiens OX=9606 GN=PRDX4 PE=1 SV=1	1472.13	1411.5	1470.94	1451.53	3.16182	0.0238815	3	338	950.454	965.261	1085.03	1000.25	3.00011	0.0737763	73.7946	3	456	0.689101	-0.537213
P30044;P30044-3;P30044-2;P30044-4	7	3	43.2888	0.0112468	1.94897	0.0104089	2.61195	0.90637	PF44	CF42	22314.6	Peroxiredoxin-5_ mitochondrial OS=Homo sapiens OX=9606 GN=PRDX5 PE=1 SV=4	184.741	347.084	364.727	298.85	2.47545	0.331988	3	894	860.319	759.255	722.173	780.583	2.89242	0.0915977	71.4996	3	538	2.61195	1.38513
P30041	19	14	120.34	0.256286	0.591275	0.0951562	1.06722	0.177134	CF42	PF44	25149.1	Peroxiredoxin-6 OS=Homo sapiens OX=9606 GN=PRDX6 PE=1 SV=3	3021.38	3238.48	3200.14	3153.34	3.49877	0.0367454	3	174	2933.63	2731.87	3198.67	2954.72	3.47052	0.0792338	234.114	3	186	0.937015	-0.0938553
E7EWE5;P51659;P51659-2;P51659-3;A0A2R8Y7L2;A0A2R8YD50;E7ET17;G5E9S2;E7EPL9;E7ER27;A0A2R8Y7W2;A0A2R8YDT8;A0A2R8YF45	9	4	55.3512	0.851262	0.0699369	0.236844	1.01355	0.0528427	CF42	PF44	78100.3	Peroxisomal multifunctional enzyme type 2 OS=Homo sapiens OX=9606 GN=HSD17B4 PE=1 SV=1	709.221	665.101	608.382	660.901	2.82014	0.0764869	3	584	669.665	710.635	575.892	652.064	2.81429	0.105932	69.0743	3	596	0.986629	-0.0194211
M0QXB5;O95571;M0QY80	3	1	24.9248	0.0162381	1.78947	0.013397	29.8397	0.841956	CF42	PF44	28900.7	Persulfide dioxygenase ETHE1_ mitochondrial OS=Homo sapiens OX=9606 GN=ETHE1 PE=1 SV=1	54.8011	123.601	144.334	107.579	2.03173	0.435659	3	1236	10.8157			10.8157	1.03405	#DIV/0!	#DIV/0!	1	1502	0.100537	-3.3142
K7ER00;Q9Y285;Q9Y285-2	2	2	12.4604	0.0395689	1.40265	0.0248066	1.20412	0.621854	PF44	CF42	62452.4	Phenylalanine--tRNA ligase alpha subunit OS=Homo sapiens OX=9606 GN=FARSA PE=1 SV=1	459.14	470.658	387.116	438.971	2.64244	0.103141	3	740	514.416	536.098	535.211	528.575	2.72311	0.0232136	12.2701	3	688	1.20412	0.267981
Q9NSD9;Q9NSD9-2	6	2	30.4091	0.291552	0.535284	0.105432	1.26516	0.15686	PF44	CF42	66743	Phenylalanine--tRNA ligase beta subunit OS=Homo sapiens OX=9606 GN=FARSB PE=1 SV=3	144.1	189.753	141.678	158.51	2.20006	0.170866	3	1121	251.64	202.589	147.393	200.54	2.3022	0.260067	52.1539	3	1043	1.26516	0.339319
Q00325;Q00325-2;F8VVM2;F8VWQ0;F8VWR4;F8VZL5	9	5	47.782	0.000615326	3.21089	0.00162587	1.41889	0.999999	CF42	PF44	40551.2	Phosphate carrier protein_ mitochondrial OS=Homo sapiens OX=9606 GN=SLC25A3 PE=1 SV=2	5926.21	5637.52	5492.74	5685.49	3.75477	0.0388146	3	91	3787.46	4145.59	4087.96	4007	3.60282	0.0479908	192.299	3	134	0.704777	-0.504762
P30086	4	3	27.0214	0.00645598	2.19004	0.00731726	1.35311	0.966967	CF42	PF44	21170.9	Phosphatidylethanolamine-binding protein 1 OS=Homo sapiens OX=9606 GN=PEBP1 PE=1 SV=3	2556.29	2501.61	2149.94	2402.61	3.38068	0.0917851	3	222	1719.19	1832.83	1774.87	1775.63	3.24935	0.0320012	56.8221	3	297	0.73904	-0.436275
Q9NTJ5;E9PGZ4;F8WCQ2;Q9NTJ5-2	2	1	14.4596	0.0646795	1.18923	0.0353069	8.16486	0.485887	CF42	PF44	67480.3	Phosphatidylinositide phosphatase SAC1 OS=Homo sapiens OX=9606 GN=SACM1L PE=1 SV=2	56.4045	101.83	91.3767	83.2039	1.92014	0.285927	3	1312	7.08342	23.488		15.2857	1.18429	0.758866	11.5998	2	1488	0.183714	-2.44447
O15357;A0A0A0MTP6;O15357-2	5	1	22.2173	0.00686864	2.16313	0.00762505	182.392	0.962243	CF42	PF44	139397	Phosphatidylinositol 3_4_5-trisphosphate 5-phosphatase 2 OS=Homo sapiens OX=9606 GN=INPPL1 PE=1 SV=2	119.595	915.915	840.203	625.238	2.79605	0.702986	3	605	4.11635	6.16763		5.14199	0.711131	0.282085	1.45048	2	1514	0.00822406	-6.92593
H0Y871;P42338;Q68DL0	3	2	13.4027	0.0839877	1.07578	0.0425565	1.09817	0.416338	PF44	CF42	81312.8	Phosphatidylinositol 4_5-bisphosphate 3-kinase catalytic subunit beta isoform (Fragment) OS=Homo sapiens OX=9606 GN=PIK3CB PE=1 SV=1	853.285	955.185	949.37	919.28	2.96345	0.0622523	3	466	1048.11	985.244	995.23	1009.53	3.00412	0.0334677	33.7866	3	453	1.09817	0.135107
A0A2R8Y2F6;P42336;C9JAM9	2	1	8.202	0.0794027	1.10016	0.0409533	7.39012	0.430985	PF44	CF42	117927	Phosphatidylinositol 4_5-bisphosphate 3-kinase catalytic subunit OS=Homo sapiens OX=9606 GN=PIK3CA PE=1 SV=1	6.3265	54.1342		30.2303	1.48044	1.11825	2	1466	125.397	96.2672	225.147	148.937	2.173	0.4538	67.5876	3	1126	4.92674	2.30063
O00750;F5GWN5	9	1	33.1996	0.0915085	1.03854	0.0453014	1.43773	0.394339	CF42	PF44	186935	Phosphatidylinositol 4-phosphate 3-kinase C2 domain-containing subunit beta OS=Homo sapiens OX=9606 GN=PIK3C2B PE=1 SV=2	740.905	795.591	908.793	815.096	2.91121	0.105051	3	512	752.56	518.236	430.001	566.932	2.75353	0.294042	166.702	3	660	0.695541	-0.523793
Q13492;Q13492-2;Q13492-3;Q13492-5;Q13492-4;E9PI56;E9PKP6;E9PLJ8;H0YEF7;H0YEH1;E5RFC6;E5RFU0;E5RGY9;E5RHK9;E5RIJ5;E5RK51;E9PDG8;O60641;O60641-3;O60641-4	8	4	45.5942	0.019694	1.70567	0.0153057	1.24424	0.800719	CF42	PF44	70925.8	Phosphatidylinositol-binding clathrin assembly protein OS=Homo sapiens OX=9606 GN=PICALM PE=1 SV=2	536.317	465.313	443.7	481.777	2.68285	0.100573	3	715	391.032	384.264	386.324	387.207	2.58794	0.00895932	3.46911	3	791	0.803706	-0.31526
P36871;P36871-2;P36871-3	9	6	47.6705	0.000832152	3.0798	0.00198013	2.03562	0.999993	CF42	PF44	61734.4	Phosphoglucomutase-1 OS=Homo sapiens OX=9606 GN=PGM1 PE=1 SV=3	266.203	287.585	279.204	277.664	2.44352	0.0388019	3	919	125.973	125.371	157.863	136.402	2.13482	0.136273	18.5879	3	1157	0.49125	-1.02547
P00558;P00558-2	32	20	209.42	0.180326	0.743941	0.0737566	1.01343	0.240495	PF44	CF42	45014	Phosphoglycerate kinase 1 OS=Homo sapiens OX=9606 GN=PGK1 PE=1 SV=3	9030.33	8954.65	9102.63	9029.2	3.95565	0.00819497	3	56	9187.71	9030.71	9232.84	9150.42	3.96144	0.0115949	106.098	3	63	1.01343	0.0192395
P07205	7	1	60.1493	0.00242159	2.6159	0.00399605	5.90904	0.998144	CF42	PF44	45195.4	Phosphoglycerate kinase 2 OS=Homo sapiens OX=9606 GN=PGK2 PE=1 SV=3	96.0212	123.719	133.666	117.802	2.07115	0.165596	3	1217	14.6593	14.4029	30.7455	19.9359	1.29964	0.469621	9.36231	3	1480	0.169232	-2.56292
P18669	11	4	90.5186	0.00046419	3.3333	0.00135084	1.36454	1	CF42	PF44	28918	Phosphoglycerate mutase 1 OS=Homo sapiens OX=9606 GN=PGAM1 PE=1 SV=2	3877.79	4070.72	4153.56	4034.02	3.60574	0.0350773	3	133	3077.8	2861.9	2929.29	2956.33	3.47075	0.0373648	110.463	3	185	0.732849	-0.448411
Q9Y263;E5RIM3;H0YC16	4	1	20.1282	0.42289	0.373773	0.138297	1.38529	0.107324	PF44	CF42	88696.9	Phospholipase A-2-activating protein OS=Homo sapiens OX=9606 GN=PLAA PE=1 SV=2	79.301	56.7137	63.1525	66.3891	1.8221	0.175274	3	1351	101.785	124.573	49.5473	91.9683	1.96364	0.418231	38.464	3	1270	1.38529	0.470191
A0A2R8YDI5;O94823;Q2YDW8	5	1	19.2855	0.396873	0.401349	0.131384	1.35251	0.114838	CF42	PF44	163951	Phospholipid-transporting ATPase OS=Homo sapiens OX=9606 GN=ATP10B PE=1 SV=1	458.284	202.082	263.692	308.019	2.48858	0.434159	3	879	265.416	241.45	176.352	227.74	2.35744	0.20237	46.0877	3	993	0.739368	-0.435636
Q9Y617;Q9Y617-2	5	1	24.743	0.227308	0.643386	0.0876457	1.26602	0.197436	CF42	PF44	40821.9	Phosphoserine aminotransferase OS=Homo sapiens OX=9606 GN=PSAT1 PE=1 SV=2	123.898	174.839	198.795	165.844	2.2197	0.230639	3	1104	148.045	120.356	124.59	130.997	2.11726	0.113858	14.9151	3	1174	0.78988	-0.340295
P23634;P23634-2;P23634-3;P23634-4;P23634-5;P23634-6;P23634-7;P23634-8;A0A2R8Y4R4;A0A2U3TZI3;A0A2U3U055;H0Y7S3;Q01814;Q01814-2;Q01814-3;Q01814-4;Q01814-5;Q01814-6;Q01814-7;Q01814-8	9	3	47.3647	0.174311	0.758674	0.072257	1.08437	0.24723	CF42	PF44	139118	Plasma membrane calcium-transporting ATPase 4 OS=Homo sapiens OX=9606 GN=ATP2B4 PE=1 SV=2	304.982	311.025	353.135	323.047	2.50927	0.0812004	3	860	291.23	305.211	297.296	297.913	2.47409	0.023532	7.01049	3	893	0.922195	-0.116857
P05121;P05121-2	2	2	9.668	0.407227	0.390163	0.134091	1.15927	0.111743	PF44	CF42	45117.1	Plasminogen activator inhibitor 1 OS=Homo sapiens OX=9606 GN=SERPINE1 PE=1 SV=1	64.0959	115.267	60.7848	80.0493	1.90336	0.38157	3	1322	97.7797	91.2258	89.3895	92.7983	1.96754	0.0475288	4.41059	3	1269	1.15927	0.21321
P05120;H7BYS2;H7C004;E7EPJ9;E7ERB5;E9PDK7;Q9NZP6	21	15	131.551	0.0334118	1.4761	0.0222072	1.15967	0.668102	PF44	CF42	46881.5	Plasminogen activator inhibitor 2 OS=Homo sapiens OX=9606 GN=SERPINB2 PE=1 SV=2	5618.78	4839.31	4949	5135.7	3.7106	0.082158	3	99	6008.09	5859.88	5999.24	5955.74	3.77494	0.013958	83.1299	3	91	1.15967	0.213719
Q14651;C9JAM8	8	1	48.0573	0.0018372	2.73584	0.00336713	1.31218	0.999405	CF42	PF44	70652.8	Plastin-1 OS=Homo sapiens OX=9606 GN=PLS1 PE=1 SV=2	311.016	309.542	313.371	311.31	2.49319	0.00620368	3	875	254.196	224.19	233.356	237.247	2.3752	0.0648138	15.3769	3	976	0.762093	-0.391961
P13796;Q5TBN3;P13796-2	11	2	63.0706	0.0279336	1.55387	0.0194046	1.18925	0.715556	PF44	CF42	70858.8	Plastin-2 OS=Homo sapiens OX=9606 GN=LCP1 PE=1 SV=6	639.564	623.926	648.087	637.192	2.80427	0.0192312	3	601	768.38	689.068	815.887	757.778	2.87954	0.0845507	64.0707	3	548	1.18925	0.250047
P13797;A0A0A0MSQ0;P13797-2;P13797-3;U3KQI3;H7C4N2;F2Z2Z9	17	9	131.353	0.201081	0.696629	0.0799112	1.04959	0.219601	CF42	PF44	71324.4	Plastin-3 OS=Homo sapiens OX=9606 GN=PLS3 PE=1 SV=4	2062.81	2083.67	2034.18	2060.22	3.31391	0.0120606	3	254	2040.74	2005.21	1842.69	1962.88	3.29289	0.0537966	105.596	3	267	0.952751	-0.0698283
Q96PX9;A0A1B0GW72	9	2	34.0341	0.0472952	1.32518	0.0279805	1.1243	0.572346	PF44	CF42	141664	Pleckstrin homology domain-containing family G member 4B OS=Homo sapiens OX=9606 GN=PLEKHG4B PE=1 SV=4	5477.57	6057.78	5904.41	5813.25	3.76442	0.0517191	3	89	6321.93	6375.72	6909.9	6535.85	3.8153	0.0497336	325.051	3	84	1.1243	0.16903
Q8IVE3;Q8IVE3-3;Q8IVE3-2;H0YBV1	8	1	34.8693	0.691689	0.160089	0.201834	1.16245	0.0629739	CF42	PF44	169826	Pleckstrin homology domain-containing family H member 2 OS=Homo sapiens OX=9606 GN=PLEKHH2 PE=1 SV=2	1677.33	846.219	856.564	1126.7	3.05181	0.423257	3	413	912.555	1009.47	985.715	969.248	2.98643	0.052117	50.5142	3	467	0.86025	-0.217173
Q15149;Q15149-2;Q15149-4;Q15149-5;Q15149-6;Q15149-7;Q15149-8;Q15149-9;Q15149-3;E9PMV1;H0YDN1;E9PKG0;E9PIA2;E9PQ28;Q96NA2	158	98	1080.26	0.543198	0.265041	0.167468	1.02779	0.0815734	CF42	PF44	533787	Plectin OS=Homo sapiens OX=9606 GN=PLEC PE=1 SV=3	4758.21	4210.51	4273.77	4414.16	3.64485	0.067878	3	115	4278.55	4254.5	4351.4	4294.82	3.63294	0.0117488	50.4587	3	128	0.972962	-0.0395442
O75051;O75051-2	7	1	26.814	0.163842	0.785574	0.0688449	1.83841	0.259802	PF44	CF42	214355	Plexin-A2 OS=Homo sapiens OX=9606 GN=PLXNA2 PE=1 SV=4	31.8399	33.0421	45.4262	36.7694	1.56549	0.204547	3	1444	76.9883	34.6764	91.1271	67.5973	1.82993	0.43454	29.3737	3	1341	1.83841	0.878459
O15031	4	1	16.7809	0.0780777	1.10747	0.0403693	8.26916	0.43541	PF44	CF42	207865	Plexin-B2 OS=Homo sapiens OX=9606 GN=PLXNB2 PE=1 SV=3		24.9586	15.159	20.0588	1.3023	0.345454	2	1492	148.792	102.662	80.2848	110.58	2.04367	0.31591	34.9332	3	1221	5.51277	2.46278
Q9Y4D7;Q9Y4D7-2;H0YAB2	6	2	25.581	0.0212541	1.67256	0.0160144	7.55211	0.783187	PF44	CF42	215429	Plexin-D1 OS=Homo sapiens OX=9606 GN=PLXND1 PE=1 SV=3	38.9305	4.49193	15.3873	19.6032	1.29233	0.897919	3	1495	160.871	172.622	110.645	148.046	2.1704	0.222354	32.9186	3	1129	7.55211	2.91688
Q9UKK3	3	1	13.6874	0.00791485	2.10156	0.00831985	1.1868	0.949621	PF44	CF42	194705	Poly [ADP-ribose] polymerase 4 OS=Homo sapiens OX=9606 GN=PARP4 PE=1 SV=3	10178.2	10320.8	10987.1	10495.4	4.021	0.0411415	3	50	13003.9	12463.8	11900.2	12456	4.09538	0.0443061	551.875	3	46	1.1868	0.24708
Q15365;F8VTZ0	10	7	69.3337	0.389828	0.409127	0.12955	1.04288	0.117028	PF44	CF42	38011.1	Poly(rC)-binding protein 1 OS=Homo sapiens OX=9606 GN=PCBP1 PE=1 SV=2	3350.78	3044.71	3465.91	3287.13	3.51682	0.0662269	3	170	3292.01	3440.38	3551.91	3428.1	3.53505	0.0380332	130.381	3	156	1.04288	0.060578
Q15366;Q15366-2;F8VZX2;H3BRU6;Q15366-5;Q15366-8;F8VXH9;F8W0G4;J3QT27;P57721-2;P57721-3;H3BSS4;H3BND9	9	1	58.2162	0.652001	0.185752	0.193398	1.05502	0.0669067	PF44	CF42	38979.4	Poly(rC)-binding protein 2 OS=Homo sapiens OX=9606 GN=PCBP2 PE=1 SV=1	1970.08	1929.18	1669.52	1856.26	3.26864	0.0878153	3	279	1986.71	1658.97	2229.51	1958.4	3.2919	0.146202	286.322	3	269	1.05502	0.0772731
Q13310;B1ANR0;Q13310-2;Q13310-3;H0Y5F5;B1ANR1;H0YEQ8;H0YEU6	12	2	76.7242	0.153917	0.812713	0.065376	1.05888	0.272844	CF42	PF44	71125.2	Polyadenylate-binding protein 4 OS=Homo sapiens OX=9606 GN=PABPC4 PE=1 SV=1	443.237	427.957	440.606	437.267	2.64075	0.0186831	3	743	438.361	405.404	395.09	412.952	2.6159	0.0547309	22.6012	3	769	0.944393	-0.0825405
A0A087WTT1;P11940;P11940-2;E7EQV3;E7ERJ7;H0YAR2;Q9H361;H0YAP2;H0YB86;H0YBN4;E5RJB9;E5RGH3;E5RH24;E5RHG7;E5RFD8;E5RGC4;H0YAS6;H0YAS7;H0YB75;H0YC10;H0YCC8	15	3	115.715	0.0106732	1.97171	0.0101028	1.16119	0.913949	CF42	PF44	58764.3	Polyadenylate-binding protein OS=Homo sapiens OX=9606 GN=PABPC1 PE=1 SV=1	1823.54	1714.46	1780.69	1772.9	3.24868	0.0309968	3	294	1585.48	1549.81	1445.1	1526.79	3.18378	0.0477889	72.9638	3	327	0.861184	-0.215606
F8VUJ3;Q8N4A0	2	1	8.2871	0.131759	0.88022	0.0582469	1.38029	0.30681	PF44	CF42	67036.6	Polypeptide N-acetylgalactosaminyltransferase OS=Homo sapiens OX=9606 GN=POC1B-GALNT4 PE=3 SV=1	537.003	638.247	608.139	594.463	2.77413	0.0874556	3	628	713.937	666.893	1080.76	820.53	2.91409	0.27615	226.589	3	519	1.38029	0.464968
Q92562;Q5JRV4	2	2	8.4029	0.0137651	1.86122	0.0120255	1.29564	0.873331	PF44	CF42	104433	Polyphosphoinositide phosphatase OS=Homo sapiens OX=9606 GN=FIG4 PE=1 SV=1	699.386	605.304	637.022	647.237	2.81106	0.0739539	3	595	778.683	828.222	908.86	838.588	2.92355	0.078352	65.7051	3	510	1.29564	0.373668
A0A0U1RRM4;A6NLN1;P26599;P26599-2;P26599-3;K7EK45;A0A0D9SF20;K7EKJ7;A0A087WU68;A0A087WUW5;K7ELW5;O95758;O95758-1;O95758-2;O95758-4;O95758-5;O95758-6;Q9UKA9-5;Q9UKA9-6;X6R242	8	5	72.0428	0.628869	0.20144	0.188483	1.05843	0.0695145	PF44	CF42	62692.4	Polypyrimidine tract-binding protein 1 OS=Homo sapiens OX=9606 GN=PTBP1 PE=1 SV=1	1482.61	1230.81	1199.86	1304.43	3.11542	0.118893	3	372	1499.9	1475.55	1166.5	1380.65	3.14008	0.134617	185.858	3	352	1.05843	0.081928
P0CG47	8	1	54.7106	0.00172172	2.76404	0.00321156	1.54765	0.999556	CF42	PF44	25818.7	Polyubiquitin-B OS=Homo sapiens OX=9606 GN=UBB PE=1 SV=1	190.019	181.043	167.874	179.645	2.25442	0.0620013	3	1074	120.527	122.066	105.636	116.076	2.06474	0.0781796	9.07482	3	1213	0.646142	-0.630076
Q6S8J3;A5A3E0;P0CG39	39	14	231.845	0.680281	0.167311	0.199451	1.01548	0.0640379	CF42	PF44	122961	POTE ankyrin domain family member E OS=Homo sapiens OX=9606 GN=POTEE PE=2 SV=3	12718.6	13046.3	13565.8	13110.3	4.11761	0.0325856	3	40	12474.3	12542.8	13714.1	12910.4	4.11094	0.0539771	696.865	3	44	0.984755	-0.0221633
Q9UHV9	3	1	18.0042	0.500512	0.300586	0.157655	1.05836	0.0892992	CF42	PF44	16704.9	Prefoldin subunit 2 OS=Homo sapiens OX=9606 GN=PFDN2 PE=1 SV=1	418.058	336.716	357.359	370.711	2.56904	0.114058	3	797	364.79	327.954	358.067	350.27	2.5444	0.056004	19.6165	3	825	0.94486	-0.0818268
P02545;P02545-3;P02545-6;P02545-2;P02545-4;P02545-5;Q3BDU5;Q5TCI8;A0A0C4DGC5;H0YAB0	69	45	454.219	0.00200889	2.69704	0.00359011	1.21936	0.999124	PF44	CF42	74424.7	Prelamin-A/C OS=Homo sapiens OX=9606 GN=LMNA PE=1 SV=1	10468	10125.4	10487.5	10360.3	4.01537	0.019654	3	52	12942	12005.9	12951	12633	4.10151	0.0429886	543.073	3	45	1.21936	0.286129
O94906;O94906-2	3	1	15.3706	0.0266148	1.57488	0.0187608	2.18977	0.728002	PF44	CF42	107724	Pre-mRNA-processing factor 6 OS=Homo sapiens OX=9606 GN=PRPF6 PE=1 SV=1	38.929	43.0285	40.7025	40.8866	1.61158	0.0502834	3	1430	106.452	55.8644	106.28	89.5323	1.95198	0.325664	29.1574	3	1274	2.18977	1.13078
Q5JRX3;Q5JRX3-2;Q5JRX3-3;A0A0A0MRX9	4	1	17.3358	0.09543	1.02032	0.0465472	1.48306	0.383752	CF42	PF44	118439	Presequence protease_ mitochondrial OS=Homo sapiens OX=9606 GN=PITRM1 PE=1 SV=3	102.864	172.772	153.516	143.051	2.15549	0.252427	3	1161	85.9133	110.081	93.3755	96.4565	1.98433	0.128294	12.3748	3	1259	0.674281	-0.568579
A0A1W2PQ51;A0A1X7SBZ2;Q92841;Q92841-1;Q92841-2;Q92841-3	11	1	73.8737	0.0516811	1.28667	0.0300388	1.03309	0.547685	PF44	CF42	81142.1	Probable ATP-dependent RNA helicase DDX17 OS=Homo sapiens OX=9606 GN=DDX17 PE=1 SV=1	343.146	356.393	352.579	350.706	2.54494	0.0194442	3	826	359.884	364.692	362.355	362.31	2.55908	0.00663674	2.40456	3	810	1.03309	0.0469629
Q9NQI0;Q9NQI0-2;Q9NQI0-3;Q9NQI0-4;D6RCM4	6	1	31.3701	0.644402	0.190843	0.191879	7.62236	0.0677364	CF42	PF44	80163.1	Probable ATP-dependent RNA helicase DDX4 OS=Homo sapiens OX=9606 GN=DDX4 PE=1 SV=2	89.479	2.50493	1.79333	31.2591	1.49498	1.61301	3	1459	3.55159	4.77163	3.97969	4.10097	0.612887	0.150939	0.618996	3	1519	0.131193	-2.93024
H0Y8L8;J3KNN5;Q9UJV9	2	1	9.4579	0.14743	0.831415	0.0630558	1.58115	0.282039	PF44	CF42	19660	Probable ATP-dependent RNA helicase DDX41 (Fragment) OS=Homo sapiens OX=9606 GN=DDX41 PE=1 SV=1	43.8187	48.7157	97.5665	63.367	1.80186	0.468994	3	1360	77.8007	100.342	122.436	100.193	2.00084	0.222751	22.318	3	1249	1.58115	0.660974
P17844;J3KTA4;P17844-2;J3KRZ1;J3QSF1;J3QRQ7;A0A0U1RQJ0;J3KRX8;J3KTQ4;J3QR02;X6RLV5	16	6	99.7147	0.81173	0.0905884	0.228801	1.00647	0.0546037	CF42	PF44	69661.4	Probable ATP-dependent RNA helicase DDX5 OS=Homo sapiens OX=9606 GN=DDX5 PE=1 SV=1	889.826	847.901	898.969	878.899	2.94394	0.0309838	3	487	903.715	864.292	851.726	873.244	2.94114	0.0310637	27.1262	3	504	0.993567	-0.00931131
P26196;Q8IV96	3	1	14.5199	0.186639	0.728996	0.0758346	1.32712	0.233775	CF42	PF44	54816.1	Probable ATP-dependent RNA helicase DDX6 OS=Homo sapiens OX=9606 GN=DDX6 PE=1 SV=2	301.012	352.944	213.322	289.093	2.46104	0.244108	3	912	213.416	249.898	190.191	217.835	2.33813	0.13817	30.0982	3	1008	0.753511	-0.408299
Q9Y4D8;Q9Y4D8-4;F8VWT9;Q9Y4D8-2;Q9Y4D8-3	28	2	108.35	0.184471	0.734073	0.0750241	1.1218	0.236045	PF44	CF42	444990	Probable E3 ubiquitin-protein ligase HECTD4 OS=Homo sapiens OX=9606 GN=HECTD4 PE=1 SV=5	333.485	329.232	316.67	326.462	2.51383	0.0267809	3	857	350.212	332.788	415.672	366.224	2.56375	0.119327	43.7005	3	807	1.1218	0.16581
Q15751;H0YNB1;H0YKW7;H0YL74	16	2	62.9624	0.0822642	1.08479	0.0418803	16.2028	0.421726	PF44	CF42	539129	Probable E3 ubiquitin-protein ligase HERC1 OS=Homo sapiens OX=9606 GN=HERC1 PE=1 SV=2		15.8797	48.537	32.2083	1.50797	0.716962	2	1456	773.492	170.505	99.7344	347.91	2.54147	1.06424	370.259	3	830	10.8019	3.43321
Q7Z333;Q7Z333-4;Q7Z333-3;X6RI79	15	1	63.4156	0.735634	0.133338	0.211646	1.0524	0.0593381	CF42	PF44	307214	Probable helicase senataxin OS=Homo sapiens OX=9606 GN=SETX PE=1 SV=4	265.815	184.785	209.26	219.953	2.34233	0.188949	3	1004	224.434	204.208	198.363	209.001	2.32015	0.0654572	13.6807	3	1022	0.950208	-0.0736846
Q13395	3	1	10.9645	0.00871833	2.05957	0.00875109	2.18663	0.939474	CF42	PF44	183956	Probable methyltransferase TARBP1 OS=Homo sapiens OX=9606 GN=TARBP1 PE=1 SV=1	227.53	229.821	226.408	227.92	2.35778	0.00763214	3	990	72.3913	120.285	120.024	104.233	2.01801	0.264564	27.5764	3	1240	0.457325	-1.12871
Q8NBJ5;M0QX72	6	3	33.2832	0.0581511	1.23544	0.0327391	1.28798	0.515038	PF44	CF42	71978.4	Procollagen galactosyltransferase 1 OS=Homo sapiens OX=9606 GN=COLGALT1 PE=1 SV=1	409.713	374.789	329.889	371.464	2.56992	0.107725	3	795	520.535	502.177	412.604	478.439	2.67983	0.120703	57.749	3	724	1.28798	0.365113
Q02809;Q02809-2;Q5JXB7;Q5JXB8	9	1	47.1485	0.0955636	1.01971	0.0465597	1.2544	0.383401	PF44	CF42	84120.6	Procollagen-lysine_2-oxoglutarate 5-dioxygenase 1 OS=Homo sapiens OX=9606 GN=PLOD1 PE=1 SV=2	71.3708	78.7875	82.0295	77.396	1.88872	0.0705968	3	1329	81.1941	98.5119	111.55	97.0853	1.98715	0.156852	15.228	3	1257	1.2544	0.326994
O00469;E7ETU9;O00469-2;O00469-3;C9JXZ0	9	1	52.7086	0.204041	0.690283	0.0804756	1.086	0.216884	CF42	PF44	85427.1	Procollagen-lysine_2-oxoglutarate 5-dioxygenase 2 OS=Homo sapiens OX=9606 GN=PLOD2 PE=1 SV=2	2766.91	2760.57	2738.37	2755.28	3.44017	0.00543942	3	193	2383.92	2831.06	2396.28	2537.08	3.40433	0.100376	254.662	3	213	0.920807	-0.11903
H7C2V1;O60568;H7C2S8	3	1	16.1708	0.959833	0.0178044	0.259255	1.0148	0.050204	PF44	CF42	31357.4	Procollagen-lysine_2-oxoglutarate 5-dioxygenase 3 (Fragment) OS=Homo sapiens OX=9606 GN=PLOD3 PE=1 SV=1	509.339	493.077	408.071	470.162	2.67225	0.11567	3	725	386.307	476.867	568.183	477.119	2.67863	0.190599	90.9385	3	725	1.0148	0.0211908
C9J0J7;C9J712;C9JQ45;G5E9Q6;P35080;P35080-2	1	1	7.7254	0.000372043	3.42941	0.00115278	1.45939	1	PF44	CF42	9954.43	Profilin OS=Homo sapiens OX=9606 GN=PFN2 PE=1 SV=1	1822.26	1670.26	1694.1	1728.87	3.23776	0.0472841	3	300	2611.59	2430.89	2526.82	2523.1	3.40193	0.0358316	90.4067	3	215	1.45939	0.545366
P07737;K7EJ44;I3L3D5	20	16	132.969	7.51912e-06	5.12383	0.000104222	3.19875	1	PF44	CF42	15225.3	Profilin-1 OS=Homo sapiens OX=9606 GN=PFN1 PE=1 SV=2	3657.53	3233.73	3328.63	3406.63	3.53232	0.0652867	3	162	11135.9	10863	10692	10897	4.03731	0.0205477	223.907	3	51	3.19875	1.67751
Q8WXW3;Q8WXW3-2;A0A087WUI6;Q8WXW3-4	2	1	8.2861	0.0989796	1.00445	0.0477247	1.39916	0.374639	PF44	CF42	90089.9	Progesterone-induced-blocking factor 1 OS=Homo sapiens OX=9606 GN=PIBF1 PE=1 SV=2	97.983	77.1065	112.669	95.9196	1.98191	0.186313	3	1274	112.344	126.688	163.587	134.207	2.12777	0.196979	26.4359	3	1163	1.39916	0.484557
Q8WUM4;Q8WUM4-2;Q8WUM4-3;C9IZF9;F8WBR8;F8WEQ7;F8WDK9	14	5	73.2239	0.0451629	1.34522	0.027107	1.29475	0.585181	CF42	PF44	96650.6	Programmed cell death 6-interacting protein OS=Homo sapiens OX=9606 GN=PDCD6IP PE=1 SV=1	440.944	455.666	513.409	470.006	2.6721	0.0814917	3	726	308.86	397.517	382.654	363.01	2.55992	0.130797	47.4808	3	809	0.772352	-0.37267
K7EQA1;O14737;O14737-2;K7ESJ4	3	1	17.9423	0.0594702	1.2257	0.0333836	1.8597	0.508864	PF44	CF42	10004.4	Programmed cell death protein 5 OS=Homo sapiens OX=9606 GN=PDCD5 PE=1 SV=1	66.3281	120.843	84.6048	90.592	1.95709	0.306278	3	1289	145.442	133.611	226.37	168.474	2.22653	0.29967	50.4866	3	1094	1.8597	0.895073
P35232;C9JW96;C9JZ20;E7ESE2;E9PCW0;D6RBK0;P35232-2	9	4	58.7772	0.0403038	1.39465	0.025121	1.15521	0.616768	CF42	PF44	29861.1	Prohibitin OS=Homo sapiens OX=9606 GN=PHB PE=1 SV=1	532.303	534.595	527.688	531.529	2.72553	0.00661899	3	674	423.369	501.264	455.715	460.116	2.66287	0.0850511	39.1334	3	736	0.865646	-0.20815
J3KPX7;Q99623;F5GWA7;F5GY37;Q99623-2;F5H3X6;F5H0C5;F5H2D2	7	5	47.186	0.00521457	2.28278	0.00626613	1.23571	0.979942	PF44	CF42	33239.4	Prohibitin-2 OS=Homo sapiens OX=9606 GN=PHB2 PE=1 SV=2	510.291	511.455	524.622	515.456	2.71219	0.0154408	3	684	684.73	610.038	616.091	636.953	2.80411	0.0651326	41.4864	3	610	1.23571	0.305338
H0YKB7;H0YLL1;H3BT15;Q14005;Q14005-2	2	1	7.4907	0.270649	0.567594	0.0992059	1.77596	0.168365	PF44	CF42	49191.4	Pro-interleukin-16 OS=Homo sapiens OX=9606 GN=IL16 PE=1 SV=2	20.7126	17.4754	31.8643	23.3508	1.3683	0.323265	3	1482	20.0501	38.5608	65.7993	41.4701	1.61774	0.554928	23.0129	3	1414	1.77596	0.828601
P12004	6	5	43.935	0.00345767	2.46122	0.00479851	1.22736	0.993636	PF44	CF42	29111	Proliferating cell nuclear antigen OS=Homo sapiens OX=9606 GN=PCNA PE=1 SV=1	539.469	599.473	587.915	575.619	2.76014	0.0553063	3	641	697.777	715.941	705.759	706.492	2.84911	0.0128867	9.10435	3	573	1.22736	0.295559
Q9UQ80;Q9UQ80-2;F8VR77;F8W0A3;H0YIN7	8	5	55.9351	0.000102233	3.99041	0.000542589	2.09693	1	CF42	PF44	44129.1	Proliferation-associated protein 2G4 OS=Homo sapiens OX=9606 GN=PA2G4 PE=1 SV=3	381.624	398.071	428.684	402.793	2.60508	0.0592936	3	762	204.541	182.383	189.336	192.087	2.2835	0.0589952	11.3322	3	1056	0.476887	-1.06828
Q07954	18	6	71.4951	0.352826	0.452439	0.121803	1.09004	0.129789	CF42	PF44	523483	Prolow-density lipoprotein receptor-related protein 1 OS=Homo sapiens OX=9606 GN=LRP1 PE=1 SV=2	391.031	350.4	303.951	348.461	2.54215	0.125043	3	828	328.487	327.838	302.708	319.678	2.50471	0.045983	14.6997	3	867	0.917399	-0.124378
Q32P28;Q32P28-3;Q32P28-4;H7C2W6	7	2	35.2869	0.155895	0.807169	0.0660857	1.20535	0.270151	PF44	CF42	84249.5	Prolyl 3-hydroxylase 1 OS=Homo sapiens OX=9606 GN=P3H1 PE=1 SV=2	179.055	203.195	262.154	214.801	2.33204	0.199012	3	1010	262.802	248.192	265.74	258.911	2.41315	0.0363016	9.39889	3	940	1.20535	0.269455
P13674;P13674-2;P13674-3	10	3	55.3031	0.000223543	3.65064	0.000822894	2.19844	1	CF42	PF44	61334.5	Prolyl 4-hydroxylase subunit alpha-1 OS=Homo sapiens OX=9606 GN=P4HA1 PE=1 SV=2	926.178	838.298	785.187	849.888	2.92936	0.0837837	3	501	413.673	385.19	360.895	386.586	2.58725	0.0683332	26.4167	3	792	0.454868	-1.13648
O15460;O15460-2;A8MXE0;C9JCP0;C9JIG4;C9JN43;C9JX45;E7ENX0;E7EPI9;E7ERI1	9	6	46.2833	0.000104563	3.98062	0.000542589	1.38104	1	CF42	PF44	61301.2	Prolyl 4-hydroxylase subunit alpha-2 OS=Homo sapiens OX=9606 GN=P4HA2 PE=1 SV=1	1023.97	963.325	990.629	992.643	2.99679	0.0305998	3	446	734.054	706.011	716.229	718.765	2.85659	0.0197459	14.1926	3	566	0.724092	-0.465755
P07602;C9JIZ6;P07602-2;P07602-3;Q5BJH1;A0A0J9YXB8	8	6	41.488	0.000220213	3.65716	0.000817625	1.87611	1	CF42	PF44	59937.6	Prosaposin OS=Homo sapiens OX=9606 GN=PSAP PE=1 SV=2	3760	3286.65	3277.3	3441.32	3.53672	0.0802092	3	159	1896.07	1834.44	1772.35	1834.29	3.26347	0.0337258	61.8628	3	291	0.533019	-0.907742
A0A087WYT3;Q15185;Q15185-3;Q15185-4;Q15185-2	3	2	20.7348	0.0394883	1.40353	0.0248066	1.09435	0.622417	CF42	PF44	19440.1	Prostaglandin E synthase 3 OS=Homo sapiens OX=9606 GN=PTGES3 PE=1 SV=1	1844.22	1748.43	1806.18	1799.61	3.25518	0.0268013	3	288	1587.07	1618.16	1728.13	1644.45	3.21602	0.0450727	74.1199	3	311	0.913783	-0.130077
H0Y586;O14818;O14818-2;A0A087WYS6;Q8TAA3;Q8TAA3-2;Q8TAA3-5;O14818-4	5	3	33.9273	0.525753	0.279218	0.163232	1.04818	0.0845723	PF44	CF42	21217.2	Proteasome endopeptidase complex (Fragment) OS=Homo sapiens OX=9606 GN=PSMA7 PE=1 SV=1	1849.66	1852.01	1518.92	1740.2	3.2406	0.110124	3	299	1795.69	1932.01	1744.43	1824.04	3.26103	0.0531528	96.9529	3	295	1.04818	0.0678886
H0YL69;H0YMZ1;H0YN18;P25789;H0YKT8;H0YMA1;H0YLC2;P25789-2;H0YKS0;H0YLS6;H0YMI6;H0YMV3	5	4	35.1946	0.0319404	1.49566	0.0215283	2.07001	0.680213	PF44	CF42	26661.5	Proteasome subunit alpha type (Fragment) OS=Homo sapiens OX=9606 GN=PSMA4 PE=1 SV=1	379.582	172.917	211.32	254.606	2.40587	0.431735	3	950	472.087	566.209	542.813	527.036	2.72184	0.0929802	49.004	3	693	2.07001	1.04964
A0A024RA52;P25787;C9JCK5	3	2	18.9505	0.662412	0.178872	0.195543	1.08137	0.0658111	CF42	PF44	26012.7	Proteasome subunit alpha type OS=Homo sapiens OX=9606 GN=PSMA2 PE=1 SV=1	272.949	385.182	280.78	312.97	2.4955	0.20021	3	870	219.74	242.635	405.885	289.42	2.46153	0.350734	101.509	3	907	0.924754	-0.112859
G3V295;G3V5Z7;P60900;G3V3I1;P60900-2;G3V3U4;P60900-3;G3V2S7;G3V4S5	6	5	41.5961	0.178573	0.748183	0.073318	1.07574	0.242423	PF44	CF42	23241.3	Proteasome subunit alpha type OS=Homo sapiens OX=9606 GN=PSMA6 PE=1 SV=1	991.065	968.136	988.302	982.501	2.99233	0.0127398	3	450	1131.46	1063.96	975.316	1056.91	3.02404	0.0740951	78.3122	3	438	1.07574	0.105328
P25786;P25786-2;F5GX11;B4DEV8	8	6	44.9454	0.260003	0.585022	0.0963624	1.05571	0.174791	CF42	PF44	29840.8	Proteasome subunit alpha type-1 OS=Homo sapiens OX=9606 GN=PSMA1 PE=1 SV=1	533.353	563.281	590.866	562.5	2.75012	0.0511366	3	649	503.281	541.456	553.711	532.816	2.72658	0.0493644	26.3022	3	681	0.947228	-0.078216
P25788;P25788-2;G3V4X5;G3V3W4;G3V5N4	7	3	44.5116	0.693133	0.159184	0.202118	1.03776	0.0628429	CF42	PF44	28661.4	Proteasome subunit alpha type-3 OS=Homo sapiens OX=9606 GN=PSMA3 PE=1 SV=2	549.909	495.043	608.443	551.132	2.74126	0.102898	3	660	603.581	484.862	504.796	531.08	2.72516	0.119707	63.5742	3	685	0.963616	-0.0534692
P28066;P28066-2	6	3	37.4372	0.00975676	2.01069	0.00952877	1.24765	0.926008	CF42	PF44	26582.2	Proteasome subunit alpha type-5 OS=Homo sapiens OX=9606 GN=PSMA5 PE=1 SV=3	693.853	604.763	678.43	659.015	2.8189	0.0722483	3	585	523.719	549.308	511.594	528.207	2.7228	0.0364502	19.2533	3	689	0.80151	-0.319208
P20618	4	2	24.0265	0.00846685	2.07228	0.00863459	1.37678	0.942682	PF44	CF42	26717.5	Proteasome subunit beta type-1 OS=Homo sapiens OX=9606 GN=PSMB1 PE=1 SV=2	474.09	505.667	569.377	516.378	2.71297	0.0939974	3	683	731.378	744.798	656.649	710.942	2.85183	0.0668058	47.4951	3	571	1.37678	0.461303
P49721;A0A087WVV1	2	1	10.8571	0.000228177	3.64173	0.000832836	3.56555	1	CF42	PF44	23007.4	Proteasome subunit beta type-2 OS=Homo sapiens OX=9606 GN=PSMB2 PE=1 SV=1	257.185	277.886	272.877	269.316	2.43026	0.0401031	3	929	90.0291	72.3439	64.2255	75.5328	1.87814	0.17468	13.1941	3	1308	0.280462	-1.83412
A0A087WUL2;P49720;A0A087WXQ8;A0A087WY10	3	2	19.2648	0.000730441	3.13642	0.00183565	1.7988	0.999997	CF42	PF44	16389.2	Proteasome subunit beta type-3 (Fragment) OS=Homo sapiens OX=9606 GN=PSMB3 PE=1 SV=1	968.85	977.661	1018.4	988.302	2.99489	0.0267439	3	448	527.828	503.57	616.873	549.424	2.73991	0.108585	59.6589	3	666	0.555927	-0.847033
P28074;P28074-3;H0YJM8;P28074-2	6	4	35.8712	0.0177872	1.74989	0.0143328	1.23582	0.823069	CF42	PF44	28651.4	Proteasome subunit beta type-5 OS=Homo sapiens OX=9606 GN=PSMB5 PE=1 SV=3	306.056	293.051	304.942	301.35	2.47907	0.0239203	3	889	251.506	219.001	261.03	243.845	2.38711	0.0903729	22.037	3	962	0.809178	-0.305471
Q99436	4	2	16.2417	0.205231	0.687757	0.0808709	1.23154	0.215809	PF44	CF42	30307.7	Proteasome subunit beta type-7 OS=Homo sapiens OX=9606 GN=PSMB7 PE=1 SV=1	592.254	610.185	585.413	595.951	2.77521	0.0214665	3	624	563.766	780.753	857.288	733.936	2.86566	0.207454	152.258	3	556	1.23154	0.300461
A0A140T998;P28062;P28062-2;Q5JNW7;X5D2R7	1	1	5.9913	0.00898443	2.04651	0.00895729	4.96396	0.936054	PF44	CF42	28135.6	Proteasome subunit beta type-8 OS=Homo sapiens OX=9606 GN=PSMB8 PE=1 SV=1	170.497	50.0121	99.9773	106.829	2.02869	0.566643	3	1238	605.208	493.49	492.182	530.293	2.72452	0.12235	64.8814	3	687	4.96396	2.31149
A0A2R8Y783	1	1	4.6048	0.0229424	1.63936	0.016663	18.6956	0.76498	PF44	CF42	33511.2	Protein 4.1 (Fragment) OS=Homo sapiens OX=9606 GN=EPB41 PE=1 SV=1		14.8912		14.8912	1.17293	#DIV/0!	1	1501	87.949	78.6064	111.844	92.7998	1.96755	0.184715	17.1415	3	1268	6.23187	2.63966
E9PKG1;Q99873;Q99873-2;Q99873-3;E9PIX6;E9PNR9;E9PQ98;H0YDE4;Q99873-5	2	1	13.4743	0.00667173	2.17576	0.00749999	5.27757	0.964518	CF42	PF44	38222.7	Protein arginine N-methyltransferase 1 OS=Homo sapiens OX=9606 GN=PRMT1 PE=1 SV=1	163.751	314.71	153.632	210.698	2.32366	0.428193	3	1017	25.9873	37.1952	56.5873	39.9233	1.60123	0.387777	15.4813	3	1420	0.189481	-2.39987
F8VXJ7;F8W031;F8W1K5;Q9Y2B0	1	1	6.7299	0.0076004	2.11916	0.0081026	1.49461	0.953497	CF42	PF44	19337.6	Protein canopy homolog 2 (Fragment) OS=Homo sapiens OX=9606 GN=CNPY2 PE=1 SV=1	358.469	338.573	382.738	359.927	2.55621	0.0614523	3	814	227.219	276.896	218.333	240.816	2.38169	0.131055	31.5602	3	970	0.66907	-0.579772
C9IZG4;O60888;O60888-2;O60888-3;C9IZQ5	2	2	13.219	0.0142425	1.84641	0.0122929	1.14884	0.867171	PF44	CF42	14685.8	Protein CutA OS=Homo sapiens OX=9606 GN=CUTA PE=1 SV=1	1148.89	1121.53	1035.1	1101.84	3.04212	0.0539086	3	419	1290.87	1239.67	1266.97	1265.84	3.10238	0.0202372	25.617	3	377	1.14884	0.20018
H7BZJ3	8	3	52.7154	0.0406255	1.3912	0.0252485	1.0444	0.614569	PF44	CF42	13747.4	Protein disulfide-isomerase A3 (Fragment) OS=Homo sapiens OX=9606 GN=PDIA3 PE=1 SV=1	6384.7	6451.18	6547.78	6461.22	3.81031	0.0126915	3	80	6905.02	6725.62	6613.58	6748.08	3.82918	0.0217859	147.013	3	81	1.0444	0.0626692
P30101	24	13	163.091	0.00436105	2.36041	0.00552435	1.12453	0.987425	CF42	PF44	57181.6	Protein disulfide-isomerase A3 OS=Homo sapiens OX=9606 GN=PDIA3 PE=1 SV=4	5240.65	5128.42	5095.79	5154.95	3.71222	0.01474	3	98	4494.3	4503.96	4753.98	4584.08	3.66125	0.0321145	147.215	3	119	0.889257	-0.169328
P13667	13	9	80.5738	0.430717	0.365808	0.139689	1.04984	0.105227	CF42	PF44	73274.7	Protein disulfide-isomerase A4 OS=Homo sapiens OX=9606 GN=PDIA4 PE=1 SV=2	1789.84	1599.36	1749.03	1712.74	3.23369	0.0585546	3	301	1678.15	1725.56	1490.57	1631.42	3.21257	0.0761721	124.269	3	313	0.952522	-0.0701761
Q15084;Q15084-2;Q15084-3;Q15084-4;Q15084-5	11	7	99.382	0.000342794	3.46497	0.00109713	1.34984	1	CF42	PF44	48520.6	Protein disulfide-isomerase A6 OS=Homo sapiens OX=9606 GN=PDIA6 PE=1 SV=1	4548.17	4614.79	4365.28	4509.41	3.65412	0.0286489	3	110	3353.36	3452.26	3216.48	3340.7	3.52384	0.0354422	118.402	3	161	0.740828	-0.43279
P07237;H7BZ94;I3L398;I3L312;H0Y3Z3;I3NI03;I3L3U6;I3L4M2;I3L3P5;I3L0S0;I3L514;I3L1Y5	30	21	200.664	0.0351932	1.45354	0.0227591	1.13	0.654012	CF42	PF44	57515.6	Protein disulfide-isomerase OS=Homo sapiens OX=9606 GN=P4HB PE=1 SV=3	4188.6	4224.56	3966.1	4126.42	3.61557	0.0339276	3	129	3610.85	3458.8	3885.48	3651.71	3.5625	0.0592204	216.256	3	146	0.884959	-0.176318
Q9Y3R5;Q9Y3R5-2	7	1	21.1012	0.549705	0.25987	0.16899	1.07384	0.0805069	PF44	CF42	260512	Protein dopey-2 OS=Homo sapiens OX=9606 GN=DOPEY2 PE=1 SV=5	697.043	651.378	600.364	649.595	2.81264	0.0744529	3	592	592.541	691.251	808.881	697.558	2.84358	0.155267	108.308	3	580	1.07384	0.102773
Q92520;C9JMN4;C9JP35	3	1	16.9462	0.0369862	1.43196	0.0235159	1.40765	0.640432	PF44	CF42	24965.7	Protein FAM3C OS=Homo sapiens OX=9606 GN=FAM3C PE=1 SV=1	96.7198	101.213	82.6062	93.5129	1.97087	0.103824	3	1281	109.045	145.605	140.251	131.634	2.11937	0.149995	19.7444	3	1170	1.40765	0.493293
Q9UK73;H3BT12	4	1	13.046	0.0612463	1.21292	0.0339055	1.16495	0.500785	CF42	PF44	71233.8	Protein fem-1 homolog B OS=Homo sapiens OX=9606 GN=FEM1B PE=1 SV=1	726.094	787.034	746.677	753.268	2.87695	0.0411542	3	539	577.741	689.317	672.767	646.608	2.81064	0.0931202	60.2123	3	599	0.858404	-0.220272
Q13045;Q13045-2;Q13045-3;J3KS54;J3QQQ2	13	2	63.084	0.373464	0.427751	0.125581	1.32363	0.122398	PF44	CF42	146234	Protein flightless-1 homolog OS=Homo sapiens OX=9606 GN=FLII PE=1 SV=2	155.382	357.388	361.331	291.367	2.46444	0.404242	3	909	474.585	408.492	273.91	385.662	2.58621	0.265173	102.267	3	793	1.32363	0.404501
A0A2C9F2R7;H0Y9X0;O94915	2	1	6.4007	0.32238	0.491631	0.113716	1.63676	0.14216	PF44	CF42	193528	Protein furry homolog-like (Fragment) OS=Homo sapiens OX=9606 GN=FRYL PE=1 SV=1	156.533	2262.58	2152.06	1523.73	3.18291	0.777904	3	325	2789.03	2152.04	2540.84	2493.97	3.39689	0.12874	321.073	3	221	1.63676	0.710841
P17252	2	1	9.0915	0.354417	0.450485	0.12209	1.03641	0.129193	PF44	CF42	77890.6	Protein kinase C alpha type OS=Homo sapiens OX=9606 GN=PRKCA PE=1 SV=4	741.617	676.764	721.873	713.418	2.85334	0.0465967	3	553	743.025	764.433	710.72	739.392	2.86887	0.0365706	27.0401	3	554	1.03641	0.0515924
Q9BY11;F6U236	5	1	17.985	0.00649939	2.18713	0.00734713	1.19275	0.966478	PF44	CF42	51307.9	Protein kinase C and casein kinase substrate in neurons protein 1 OS=Homo sapiens OX=9606 GN=PACSIN1 PE=1 SV=1	18087.2	17053.6	17329.2	17490	4.24279	0.0306018	3	28	22075.4	20156.3	20351.7	20861.1	4.31934	0.0506269	1056.13	3	27	1.19275	0.254286
A0A087WTR9;A0A087WZ58;O15151;O15151-5	2	1	9.5721	0.602624	0.219954	0.181883	1.09774	0.0727831	PF44	CF42	30833.3	Protein Mdm4 OS=Homo sapiens OX=9606 GN=MDM4 PE=1 SV=1	242.618	139.625	290.643	224.296	2.35082	0.344003	3	996	270.931	208.887	258.839	246.219	2.39132	0.133584	32.8909	3	957	1.09774	0.13454
Q7Z3U7;A0A286YFF8;Q7Z3U7-2;Q7Z3U7-5;Q7Z3U7-6;Q7Z3U7-3	5	2	16.4935	0.00748499	2.12581	0.00805294	3.49784	0.954903	CF42	PF44	192469	Protein MON2 homolog OS=Homo sapiens OX=9606 GN=MON2 PE=1 SV=3	200.73	144.094	108.985	151.27	2.17975	0.30602	3	1140	30.3567	43.4142	55.9689	43.2466	1.63595	0.296137	12.8069	3	1411	0.28589	-1.80647
E7ESM1;Q92597;Q92597-2;Q92597-3;E5RJY1	3	1	16.4822	0.222289	0.653083	0.086251	1.70609	0.201366	PF44	CF42	15170.9	Protein NDRG1 OS=Homo sapiens OX=9606 GN=NDRG1 PE=1 SV=1	87.5362	30.6099	11.671	43.2724	1.63621	0.912496	3	1427	63.5988	79.8841	77.9973	73.8267	1.86821	0.120658	8.90776	3	1319	1.70609	0.770696
Q9BZQ8	2	1	7.581	0.00253722	2.59564	0.00403236	23.1237	0.997788	PF44	CF42	104104	Protein Niban OS=Homo sapiens OX=9606 GN=FAM129A PE=1 SV=1	13.589	3.60664	18.3424	11.846	1.07357	0.634889	3	1509	288.615	281.825	251.332	273.924	2.43763	0.0724933	19.8576	3	924	23.1237	4.5313
Q8IWE2;Q8IWE2-2	6	5	32.1711	0.14944	0.825534	0.0637256	1.12852	0.279129	CF42	PF44	61084	Protein NOXP20 OS=Homo sapiens OX=9606 GN=FAM114A1 PE=1 SV=2	570.66	481.027	493.4	515.029	2.71183	0.0943121	3	686	428.242	492.36	448.523	456.375	2.65932	0.0718103	32.7724	3	740	0.886115	-0.174435
Q14207	2	2	6.9142	0.000455809	3.34122	0.00133547	2.46172	1	PF44	CF42	155602	Protein NPAT OS=Homo sapiens OX=9606 GN=NPAT PE=1 SV=3	45.8227	56.3506	47.9329	50.0354	1.69928	0.111322	3	1410	121.009	136.579	111.931	123.173	2.09052	0.101202	12.4654	3	1194	2.46172	1.29967
C9JD73;C9J177;C9JRC4;H7C118;Q15435;Q15435-2;Q15435-3;Q15435-4;Q15435-5	2	1	9.0868	0.000113377	3.94548	0.000550878	4.95596	1	CF42	PF44	32505	Protein phosphatase 1 regulatory subunit 7 (Fragment) OS=Homo sapiens OX=9606 GN=PPP1R7 PE=1 SV=1	721.596	587.013	697.217	668.609	2.82517	0.107249	3	578	155.952	132.654	116.124	134.91	2.13004	0.148318	20.0096	3	1161	0.201777	-2.30916
Q9Y6V0;Q9Y6V0-6;E9PE96	8	2	39.4322	0.080652	1.09338	0.0413528	5.03356	0.426893	PF44	CF42	562525	Protein piccolo OS=Homo sapiens OX=9606 GN=PCLO PE=1 SV=5	177.632	74.7637	107.138	119.845	2.07862	0.438886	3	1213	153.022	849.996	806.716	603.245	2.78049	0.647339	390.504	3	624	5.03356	2.33158
P29590;P29590-11;H3BT57;P29590-10;P29590-12;P29590-13;P29590-14;P29590-2;P29590-3;P29590-4;P29590-5;P29590-8;P29590-9;H3BT29;H3BUJ5;H3BVD2	8	3	43.8294	0.471555	0.326468	0.150442	1.073	0.095352	PF44	CF42	99204.5	Protein PML OS=Homo sapiens OX=9606 GN=PML PE=1 SV=3	195.411	200.249	198.478	198.046	2.29677	0.0123599	3	1036	180.295	234.703	222.512	212.503	2.32737	0.134357	28.5514	3	1017	1.073	0.101652
E7EPN9;Q9Y520;Q9Y520-4;Q9Y520-5;Q9Y520-6;Q9Y520-7;Q9Y520-2;Q9Y520-3;A0A2R8YET2;H7C5N8;A0A0A0MS30;A0A2R8Y7F4	9	1	39.2862	0.00219777	2.65802	0.00375623	3.30088	0.998731	CF42	PF44	309347	Protein PRRC2C OS=Homo sapiens OX=9606 GN=PRRC2C PE=1 SV=1	123.684	132.324	88.3365	114.781	2.05987	0.203044	3	1223	40.69	27.5047	36.1239	34.7729	1.54124	0.192555	6.69568	3	1437	0.302949	-1.72285
Q14690	13	2	44.4849	0.798931	0.0974906	0.225636	1.0275	0.0552721	PF44	CF42	210070	Protein RRP5 homolog OS=Homo sapiens OX=9606 GN=PDCD11 PE=1 SV=3	124.853	105.792	151.712	127.452	2.10535	0.18101	3	1190	133.829	114.956	144.087	130.957	2.11713	0.112832	14.7762	3	1175	1.0275	0.0391384
P31949	11	7	68.3254	0.452919	0.343979	0.145109	1.18182	0.0996479	PF44	CF42	11854.5	Protein S100-A11 OS=Homo sapiens OX=9606 GN=S100A11 PE=1 SV=2	6446.31	5823.45	5334.24	5868	3.76849	0.0949849	3	87	4887.17	8374.99	7542.62	6934.93	3.84104	0.262669	1821.59	3	78	1.18182	0.241012
Q96FQ6	2	1	11.0618	0.0766938	1.11524	0.0398452	2.11198	0.440131	CF42	PF44	11858.4	Protein S100-A16 OS=Homo sapiens OX=9606 GN=S100A16 PE=1 SV=1	125.677	144	85.3758	118.351	2.07317	0.253405	3	1215	30.591	48.9601	88.5628	56.038	1.74848	0.528694	29.6269	3	1371	0.47349	-1.07859
P26447	9	5	37.6094	0.0043376	2.36275	0.00552295	1.28496	0.98761	PF44	CF42	11956.7	Protein S100-A4 OS=Homo sapiens OX=9606 GN=S100A4 PE=1 SV=1	28784.2	28079.8	26487.9	27784	4.44379	0.0423418	3	16	37591.9	36155.3	33356.6	35701.2	4.55268	0.0603292	2153.83	3	14	1.28496	0.361722
P06703;R4GN98	12	6	83.7356	0.0507741	1.29436	0.0295915	1.15044	0.552604	PF44	CF42	10236.8	Protein S100-A6 OS=Homo sapiens OX=9606 GN=S100A6 PE=1 SV=1	11778.7	10048.1	10278.1	10701.6	4.02945	0.0878173	3	49	12618.8	12297.4	12018.7	12311.6	4.09032	0.0243902	300.283	3	47	1.15044	0.202189
A8MXL6;P55735;P55735-2;P55735-3;P55735-4;E7ERC8	5	2	29.7121	0.000119743	3.92175	0.000550878	1.43579	1	PF44	CF42	32051.6	Protein SEC13 homolog OS=Homo sapiens OX=9606 GN=SEC13 PE=1 SV=1	236.285	228.672	223.5	229.486	2.36076	0.0280235	3	988	319.409	328.857	340.216	329.494	2.51785	0.0316191	10.4183	3	850	1.43579	0.52185
Q01105;A0A087X027;A0A0C4DFV9;P0DME0;Q01105-2;Q01105-3;Q01105-4	5	1	20.1796	0.00854258	2.06841	0.00863672	3.75724	0.941719	PF44	CF42	33488.9	Protein SET OS=Homo sapiens OX=9606 GN=SET PE=1 SV=3	209.753	561.545	309.371	360.223	2.55657	0.503369	3	813	1493.95	1242.7	1323.67	1353.44	3.13144	0.0947532	128.243	3	357	3.75724	1.90967
Q9ULL8	3	1	11.275	0.218621	0.660308	0.0851347	1.05918	0.204325	PF44	CF42	167139	Protein Shroom4 OS=Homo sapiens OX=9606 GN=SHROOM4 PE=1 SV=3	502.78	569.657	547.817	540.085	2.73246	0.0631426	3	666	574.272	555.278	586.596	572.049	2.75743	0.0275795	15.7768	3	654	1.05918	0.0829519
O94964;O94964-2;O94964-4;X6R3R3;H0YDM2	14	2	52.0843	0.255916	0.591903	0.0951562	16.5236	0.17737	CF42	PF44	161300	Protein SOGA1 OS=Homo sapiens OX=9606 GN=SOGA1 PE=1 SV=2	3.74442	336.258	311.466	217.156	2.33677	0.853005	3	1007		21.697	17.7296	19.7133	1.29476	0.142309	2.80537	2	1482	0.0907792	-3.46149
A3KN83;A3KN83-2;A3KN83-3;A3KN83-4	7	1	25.5579	0.00845677	2.0728	0.00863459	6.39729	0.94281	PF44	CF42	154997	Protein strawberry notch homolog 1 OS=Homo sapiens OX=9606 GN=SBNO1 PE=1 SV=1	15.8406	28.2586	67.0275	37.0422	1.5687	0.720797	3	1442	233.151	225.258	252.501	236.97	2.37469	0.0591519	14.0172	3	977	6.39729	2.67746
C9JJP5;C9JUE0;Q92734;Q92734-2;Q92734-3;Q92734-4	2	1	11.6036	0.0229275	1.63964	0.016663	1.33376	0.765136	PF44	CF42	20422.1	Protein TFG (Fragment) OS=Homo sapiens OX=9606 GN=TFG PE=1 SV=1	774.6	636.685	602.144	671.143	2.82682	0.135956	3	576	932.586	906.434	846.411	895.143	2.95189	0.0493586	44.183	3	492	1.33376	0.415499
A0A0A6YYA0;Q86XR7-2;Q9Y3B3;Q9Y3B3-2;G3V2Y2	4	2	26.1888	0.312379	0.505318	0.11119	1.0952	0.146665	CF42	PF44	21575.1	Protein TMED7-TICAM2 OS=Homo sapiens OX=9606 GN=TMED7-TICAM2 PE=3 SV=1	1256.84	1058.95	1253.51	1189.76	3.07546	0.0952323	3	395	1086.52	1188.28	984.234	1086.34	3.03597	0.093914	102.023	3	424	0.913076	-0.131193
F5H365;Q15436;Q15436-2;G3V1W4;G3V2R6;G3V3G5;G3V4V1;G3V4Q2;G3V5X8;Q5QPE2	11	6	73.1344	0.000751887	3.12385	0.00185269	1.92318	0.999996	CF42	PF44	83881.8	Protein transport protein SEC23 OS=Homo sapiens OX=9606 GN=SEC23A PE=1 SV=1	840.591	929.067	942.751	904.136	2.95623	0.0613357	3	474	527.095	453.035	430.249	470.127	2.67221	0.107705	50.6348	3	728	0.519973	-0.94349
G5EA31;P53992;P53992-2	6	2	32.6622	0.0999513	1.00021	0.0479916	23.621	0.372218	PF44	CF42	113582	Protein transport protein Sec24C OS=Homo sapiens OX=9606 GN=SEC24C PE=1 SV=1	128.824	131.707	150.862	137.131	2.13713	0.087352	3	1170	159.381	4994.13	4563.98	3239.16	3.51043	0.826086	2675.83	3	169	23.621	4.562
E9PDM8;O94855;O94855-2;E9PC44	7	3	38.0792	0.128054	0.892608	0.0571523	1.16533	0.313273	PF44	CF42	76151.6	Protein transport protein Sec24D OS=Homo sapiens OX=9606 GN=SEC24D PE=1 SV=1	197.032	232.494	184.879	204.801	2.31133	0.1208	3	1027	221.281	257.827	236.874	238.661	2.37778	0.0768388	18.3384	3	973	1.16533	0.220736
O94979;D6REX3;O94979-10;O94979-2;O94979-3;O94979-4;O94979-6;O94979-8;O94979-9;D6RHZ5;O94979-5;H7BXG7;O94979-7;H0Y9T9;H0Y8W8;H0YAF5	7	5	34.4966	0.00752531	2.12348	0.00806247	1.46994	0.954413	PF44	CF42	133984	Protein transport protein Sec31A OS=Homo sapiens OX=9606 GN=SEC31A PE=1 SV=3	934.82	955.571	915.806	935.399	2.971	0.0212622	3	460	1493.8	1453.36	1177.77	1374.98	3.1383	0.125078	171.979	3	353	1.46994	0.555755
P60468	2	2	13.725	0.0504972	1.29673	0.02951	1.10589	0.554124	PF44	CF42	10031.5	Protein transport protein Sec61 subunit beta OS=Homo sapiens OX=9606 GN=SEC61B PE=1 SV=2	975.077	896.776	883.674	918.509	2.96308	0.0538101	3	467	997.344	993.329	1056.63	1015.77	3.00679	0.0348962	35.4464	3	450	1.10589	0.145206
Q8N2C7;Q8N2C7-2;Q8N2C7-4;Q8N2C7-7;Q8N2C7-3;H3BLU5	7	4	28.5128	0.0215962	1.66562	0.0161829	5.52029	0.779434	CF42	PF44	367383	Protein unc-80 homolog OS=Homo sapiens OX=9606 GN=UNC80 PE=1 SV=2	343.753	103.992	102.731	183.492	2.26362	0.756388	3	1067	25.0546	34.0026	40.6617	33.2396	1.52166	0.235607	7.83149	3	1441	0.18115	-2.46474
Q9ULE0	3	1	11.3448	0.705512	0.151496	0.204967	1.01025	0.0617528	PF44	CF42	123817	Protein WWC3 OS=Homo sapiens OX=9606 GN=WWC3 PE=1 SV=3	3253.25	3056.17	3049.27	3119.56	3.49409	0.0371284	3	177	3070.39	3228.51	3155.69	3151.53	3.49852	0.0251121	79.1414	3	174	1.01025	0.0147082
Q969M3;Q969M3-3	1	1	5.0241	0.133234	0.875385	0.0587557	6.56217	0.304307	CF42	PF44	28388.5	Protein YIPF5 OS=Homo sapiens OX=9606 GN=YIPF5 PE=1 SV=1	271.524	260.086	104.634	212.081	2.3265	0.439585	3	1015	40.9598	55.9965		48.4781	1.68555	0.219326	10.6325	2	1394	0.228583	-2.12921
K7ELW0;Q99497;K7EN27	5	5	33.9781	0.00110053	2.9584	0.00232411	1.40929	0.999957	PF44	CF42	18081	Protein/nucleic acid deglycase DJ-1 OS=Homo sapiens OX=9606 GN=PARK7 PE=1 SV=1	943.863	840.823	844.093	876.26	2.94263	0.06684	3	490	1265.15	1240.39	1199.18	1234.9	3.09163	0.0269837	33.3223	3	383	1.40929	0.494969
P21980;P21980-2;A2A299;P21980-3;A2A2A0	17	12	119.934	0.0694066	1.1586	0.0371804	1.08809	0.466784	PF44	CF42	78469.5	Protein-glutamine gamma-glutamyltransferase 2 OS=Homo sapiens OX=9606 GN=TGM2 PE=1 SV=2	7244.71	6685.25	6643.63	6857.86	3.83619	0.0489459	3	71	7292.15	7765.17	7328.61	7461.98	3.87285	0.0352731	263.207	3	71	1.08809	0.121799
A0A0A0MRJ6;C9J0F2;H7BY58;P22061;P22061-2	1	1	7.446	0.00357753	2.44642	0.00482424	1.71698	0.992927	PF44	CF42	30543.1	Protein-L-isoaspartate O-methyltransferase OS=Homo sapiens OX=9606 GN=PCMT1 PE=1 SV=1	533.485	407.904	431.602	457.664	2.66055	0.145792	3	733	802.05	822.938	732.408	785.799	2.89531	0.0603243	47.4028	3	533	1.71698	0.779872
Q14517;A0A087WVP1;D6RCE4	9	1	41.2422	0.134163	0.872368	0.059083	1.3363	0.30275	CF42	PF44	509695	Protocadherin Fat 1 OS=Homo sapiens OX=9606 GN=FAT1 PE=1 SV=2	150.39	179.637	147.899	159.309	2.20224	0.110785	3	1120	98.1779	101.421	158.051	119.217	2.07634	0.282431	33.6704	3	1203	0.748336	-0.418241
Q6V0I7;Q6V0I7-3;Q6V0I7-2	6	1	22.328	0.000140903	3.85108	0.000586159	1.45085	1	PF44	CF42	546622	Protocadherin Fat 4 OS=Homo sapiens OX=9606 GN=FAT4 PE=1 SV=2	502.414	487.713	525.718	505.282	2.70353	0.0379275	3	692	712.216	741.918	745.124	733.086	2.86516	0.0247515	18.145	3	557	1.45085	0.536895
Q9P2E7;Q9P2E7-2	4	1	15.686	0.00928671	2.03214	0.00917371	1.75206	0.93214	CF42	PF44	114305	Protocadherin-10 OS=Homo sapiens OX=9606 GN=PCDH10 PE=2 SV=2	552.167	796.344	672.736	673.749	2.8285	0.181213	3	573	347.738	412.468	393.436	384.547	2.58495	0.0865121	33.268	3	795	0.570758	-0.80905
P00491	2	1	12.0211	0.314364	0.502568	0.111528	1.10874	0.145752	PF44	CF42	32346.1	Purine nucleoside phosphorylase OS=Homo sapiens OX=9606 GN=PNP PE=1 SV=2	944.667	685.868	746.368	792.301	2.89889	0.170864	3	521	847.273	884.883	903.202	878.452	2.94372	0.0324592	28.5138	3	501	1.10874	0.148916
Q6NVV1	4	1	15.3879	0.0197231	1.70502	0.0153057	1.23827	0.800385	PF44	CF42	12191.7	Putative 60S ribosomal protein L13a protein RPL13AP3 OS=Homo sapiens OX=9606 GN=RPL13AP3 PE=5 SV=1	408.371	358.838	431.653	399.621	2.60165	0.0930568	3	766	511.689	490.577	482.248	494.838	2.69446	0.0306686	15.176	3	715	1.23827	0.308324
Q8N7Z5;D6RJB7	10	2	39.6924	0.00314442	2.50246	0.00451429	1.15416	0.995309	PF44	CF42	212926	Putative ankyrin repeat domain-containing protein 31 OS=Homo sapiens OX=9606 GN=ANKRD31 PE=5 SV=2	633.388	612.015	607.88	617.761	2.79082	0.0221607	3	609	719.789	731.645	687.556	712.997	2.85309	0.032	22.8159	3	569	1.15416	0.206846
A6NMY6	49	17	281.645	0.412757	0.384306	0.135808	1.04212	0.110148	CF42	PF44	38830.2	Putative annexin A2-like protein OS=Homo sapiens OX=9606 GN=ANXA2P2 PE=5 SV=2	4509.95	4081.23	4200.24	4263.81	3.6298	0.0519057	3	120	4335.19	4092.13	3847.05	4091.46	3.61188	0.0596544	244.073	3	132	0.959578	-0.059528
A8MPP1;Q96FC9-2;Q96FC9-3;Q96FC9;Q96FC9-4;Q92771;C9K0E8;F5H235;F6WZM0;B4DMS8;F5GXJ8;Q96FC9-5;F5GXL6;F5GYY1;H0YFY8	14	2	67.6042	0.00121578	2.91515	0.0025054	1.2822	0.999924	PF44	CF42	103008	Putative ATP-dependent RNA helicase DDX11-like protein 8 OS=Homo sapiens OX=9606 GN=DDX11L8 PE=1 SV=1	890.337	944.391	988.1	940.943	2.97356	0.0520463	3	457	1210.94	1195.73	1212.77	1206.48	3.08152	0.00775099	9.35141	3	390	1.2822	0.358625
H7BZ55	9	1	33.0642	0.085438	1.06835	0.0430653	2.84114	0.411909	PF44	CF42	187012	Putative ciliary rootlet coiled-coil protein 2 OS=Homo sapiens OX=9606 GN=CROCC2 PE=5 SV=3	27.3201	105.852	18.9732	50.7152	1.70514	0.945124	3	1406	210.393	114.21	107.665	144.089	2.15863	0.399157	57.5142	3	1143	2.84114	1.50647
Q5VTE0;P68104;A0A087WVQ9;P68104-2;A0A087WV01;A0A2U3TZH3;Q05639;A0A2R8Y488;A6PW80;Q5JR01;A0A2R8Y660;A0A2R8YDN5	43	28	220.5	0.000955489	3.01977	0.00214468	1.14125	0.999982	PF44	CF42	50527.3	Putative elongation factor 1-alpha-like 3 OS=Homo sapiens OX=9606 GN=EEF1A1P5 PE=5 SV=1	25229.2	25177.1	25247	25217.8	4.40171	0.00144194	3	18	29421.8	28962.1	27955.6	28779.8	4.45909	0.0260567	749.907	3	17	1.14125	0.190617
A6NGU5;B5MCK8;P36268;P36268-2;P36268-3;E7ET76;E7ETR7;P19440;P19440-2	3	2	15.2882	0.0222265	1.65313	0.0163638	1.37234	0.772605	PF44	CF42	61957.9	Putative glutathione hydrolase 3 proenzyme OS=Homo sapiens OX=9606 GN=GGT3P PE=5 SV=2	282.565	308.974	314.123	301.887	2.47984	0.0560807	3	888	358.69	412.116	472.073	414.293	2.61731	0.136915	56.7227	3	768	1.37234	0.456641
Q58FF8	20	1	123.541	0.015098	1.82108	0.0128257	1.22856	0.856249	PF44	CF42	44520.1	Putative heat shock protein HSP 90-beta 2 OS=Homo sapiens OX=9606 GN=HSP90AB2P PE=1 SV=2	24107.3	26759.6	28091.6	26319.5	4.42028	0.0770636	3	17	33784.5	31212.4	32008.1	32335	4.50967	0.0407253	1316.85	3	16	1.22856	0.296967
Q6DRA6;Q6DN03	8	2	31.7378	0.0100203	1.99912	0.00974195	1.29038	0.922551	PF44	CF42	18417.3	Putative histone H2B type 2-D OS=Homo sapiens OX=9606 GN=HIST2H2BD PE=5 SV=3	504.004	589.817	600.133	564.651	2.75178	0.0934642	3	648	738.088	728.947	718.808	728.615	2.8625	0.0132365	9.64432	3	560	1.29038	0.367796
P01893;A0A0G2JH66;A0A0G2JPA3;A0A140T8X0;A0A140T939;A0A140T9B7;A0A140T9C2;A0A140T9D9;A0A140T9V0;A0A140T9W3;A0A140T9W7;A0A140T9X6;D0EV57;Q09160;A0A0G2JNV5;A0A0G2JNX1;A0A0G2JPQ3;A0A140T9J8;A0A140T9Z7;A0A140TA12;F8W9Z8;P17693;P17693-2;P17693-5;P17693-6;P30511-2;Q31611;Q5RJ85;Q8MH48	9	2	59.7681	0.168276	0.773978	0.0702964	1.18012	0.254339	PF44	CF42	41120.1	Putative HLA class I histocompatibility antigen_ alpha chain H OS=Homo sapiens OX=9606 GN=HLA-H PE=5 SV=3	190.993	236.796	271.532	233.107	2.36756	0.173295	3	979	273.579	266.021	285.685	275.095	2.43948	0.0360569	9.91907	3	922	1.18012	0.238938
Q9C0F0;A0A2R8Y461;Q9C0F0-2	6	3	20.5978	0.641333	0.192916	0.19142	1.10327	0.0680789	CF42	PF44	244485	Putative Polycomb group protein ASXL3 OS=Homo sapiens OX=9606 GN=ASXL3 PE=2 SV=3	314.396	31.408	75.7898	140.531	2.14777	1.08302	3	1166	127.316	133.101	121.715	127.377	2.10509	0.0446973	5.69341	3	1187	0.906398	-0.141784
Q9H853	4	1	18.2257	0.00180855	2.74267	0.00332877	13.7303	0.999445	CF42	PF44	27836.4	Putative tubulin-like protein alpha-4B OS=Homo sapiens OX=9606 GN=TUBA4B PE=5 SV=2	291.974	296.629	213.728	267.444	2.42723	0.174157	3	934	28.9965	20.6309	8.80777	19.4784	1.28955	0.520761	10.1436	3	1484	0.0728316	-3.77929
H3BND4;Q6P996;Q6P996-3;Q6P996-4;Q6P996-5;Q6P996-2;Q86XE2;Q6XYB5;J3KNK7;Q6P474	7	1	37.4615	0.00462346	2.33503	0.00577188	4.49822	0.985275	PF44	CF42	89788.9	Pyridoxal-dependent decarboxylase domain-containing protein 1 OS=Homo sapiens OX=9606 GN=PDXDC1 PE=1 SV=1	42.0538	25.7881	18.7491	28.8637	1.46035	0.414114	3	1469	101.977	161.286	126.242	129.835	2.11339	0.229658	29.8176	3	1180	4.49822	2.16935
P11177;P11177-2;P11177-3;C9J634;F8WF02	7	4	39.5505	0.583603	0.233883	0.177135	1.05727	0.075375	PF44	CF42	39575.7	Pyruvate dehydrogenase E1 component subunit beta_ mitochondrial OS=Homo sapiens OX=9606 GN=PDHB PE=1 SV=3	43673.1	41653.2	42345.3	42557.2	4.62897	0.0241199	3	10	51222	45128.4	38632.4	44994.3	4.65316	0.139926	6295.87	3	8	1.05727	0.0803379
P14618;P14618-3;B4DNK4;H3BQ34;H3BTJ2;H3BUW1;H3BT25;H3BU13;P30613-2	73	25	446.149	0.000719535	3.14295	0.00183373	1.21018	0.999997	CF42	PF44	58507.3	Pyruvate kinase PKM OS=Homo sapiens OX=9606 GN=PKM PE=1 SV=4	27788.9	27468.9	28244.2	27834	4.44458	0.0139976	3	15	23558.6	22162.1	23278.9	22999.9	4.36173	0.0321253	738.877	3	21	0.826323	-0.275222
P31150;G5E9U5	15	6	88.6958	0.00251126	2.60011	0.00402077	1.20348	0.997871	CF42	PF44	51210.1	Rab GDP dissociation inhibitor alpha OS=Homo sapiens OX=9606 GN=GDI1 PE=1 SV=2	1516.17	1534.36	1507.15	1519.23	3.18162	0.00912185	3	328	1273.06	1314.99	1199.05	1262.36	3.10118	0.0465043	58.7053	3	379	0.830925	-0.267209
P50395;P50395-2;Q5SX87;Q5SX86;Q5SX90;Q5SX91;V9GYF8;V9GYJ7	13	4	77.1417	0.0471176	1.32682	0.0279138	1.14624	0.573394	CF42	PF44	51119.6	Rab GDP dissociation inhibitor beta OS=Homo sapiens OX=9606 GN=GDI2 PE=1 SV=2	1472.64	1367.66	1599.72	1480.01	3.17026	0.0785158	3	333	1268.23	1277.12	1328.22	1291.19	3.11099	0.0250753	32.3769	3	372	0.872419	-0.196907
Q86YS3;Q86YS3-2;J3QKR9;K7EL58	7	1	28.6919	0.00278327	2.55545	0.00423583	3.04543	0.996907	CF42	PF44	72612.6	Rab11 family-interacting protein 4 OS=Homo sapiens OX=9606 GN=RAB11FIP4 PE=1 SV=1	115.479	123.841	103.138	114.153	2.05749	0.0912396	3	1225	39.379	26.638	46.4325	37.4832	1.57384	0.267654	10.0325	3	1428	0.32836	-1.60665
Q15042;Q15042-3;Q15042-4	5	1	22.3579	0.418534	0.378269	0.13708	1.27106	0.108523	PF44	CF42	111664	Rab3 GTPase-activating protein catalytic subunit OS=Homo sapiens OX=9606 GN=RAB3GAP1 PE=1 SV=3	63.3472	145.56	65.3482	91.4184	1.96103	0.513009	3	1286	104.462	156.163	87.9692	116.198	2.0652	0.306198	35.5795	3	1212	1.27106	0.346027
F6WQW2;P43487;P43487-2;C9JDM3;C9JJ34;C9JXG8;C9JGV6	4	2	20.8066	0.0082775	2.0821	0.0085699	1.2922	0.945079	PF44	CF42	32303.5	Ran-specific GTPase-activating protein OS=Homo sapiens OX=9606 GN=RANBP1 PE=1 SV=1	743.313	768.515	779.916	763.914	2.88304	0.0245188	3	535	1088.37	929.589	943.428	987.13	2.99437	0.089099	87.9523	3	461	1.2922	0.369829
Q6R327;Q6R327-3;D6R9S6;Q6R327-4	13	1	55.8034	0.75931	0.119581	0.216434	1.14444	0.0576638	CF42	PF44	194328	Rapamycin-insensitive companion of mTOR OS=Homo sapiens OX=9606 GN=RICTOR PE=1 SV=1	38.3758	73.6757	88.3493	66.8003	1.82478	0.384525	3	1350	51.834	74.0851	49.1892	58.3694	1.76619	0.234271	13.6743	3	1364	0.87379	-0.194641
Q13283;E5RIZ6;E5RH42;E5RI46;E5RIF8;E5RJU8;Q13283-2;E5RH00	10	6	67.1658	0.0358907	1.44502	0.0231519	1.21725	0.64866	CF42	PF44	52221.4	Ras GTPase-activating protein-binding protein 1 OS=Homo sapiens OX=9606 GN=G3BP1 PE=1 SV=1	556.822	484.547	536.982	526.117	2.72108	0.070978	3	679	415.965	474.08	406.603	432.216	2.6357	0.0845786	36.5563	3	754	0.821521	-0.283631
Q9UN86;Q9UN86-2;D6RAC7;D6RB17;D6RBM9;D6RBR0;D6RBW8;D6RE13;D6REX8;D6RGJ4	4	2	18.5557	0.023872	1.62211	0.017222	5.70264	0.755285	PF44	CF42	54178.3	Ras GTPase-activating protein-binding protein 2 OS=Homo sapiens OX=9606 GN=G3BP2 PE=1 SV=2	50.9451	7.69039	10.5818	23.0724	1.36309	1.04808	3	1484	153.645	128.181	112.894	131.574	2.11917	0.156462	20.5862	3	1171	5.70264	2.51163
P46940;H0YLE8;A0A0J9YXZ5;A0A087WWP1;H0YKA5	29	17	210.309	0.0286431	1.54298	0.0198335	1.09248	0.709033	CF42	PF44	189880	Ras GTPase-activating-like protein IQGAP1 OS=Homo sapiens OX=9606 GN=IQGAP1 PE=1 SV=1	2225.73	2145.36	2102.39	2157.83	3.33402	0.0290136	3	248	1973.05	2046.5	1905.93	1975.16	3.2956	0.0355978	70.3113	3	265	0.915348	-0.127608
Q13576;E7EWC2;F5H7S7;Q13576-2;Q13576-3;E9PDT6;D6R939;D6RDK8;D6RGC6	13	2	58.8664	8.74781e-05	4.0581	0.000489303	1.96486	1	PF44	CF42	181148	Ras GTPase-activating-like protein IQGAP2 OS=Homo sapiens OX=9606 GN=IQGAP2 PE=1 SV=4	172.821	162.41	151.988	162.406	2.2106	0.0641402	3	1113	307.998	319.416	329.903	319.106	2.50393	0.0343339	10.9561	3	868	1.96486	0.974426
Q96PV0	4	2	12.1306	0.0921784	1.03537	0.0454762	1.12999	0.39249	CF42	PF44	149254	Ras/Rap GTPase-activating protein SynGAP OS=Homo sapiens OX=9606 GN=SYNGAP1 PE=1 SV=4	268.971	255.469	265.466	263.302	2.42045	0.0266109	3	938	225.358	215.411	258.272	233.013	2.36738	0.0962714	22.4325	3	983	0.884966	-0.176306
P63000;P63000-2;P60763;J3KSC4;J3QLK0;B1AH79;F8WET9;G3V476;G3V4H1;P17081;Q9H4E5;Q9H4E5-2	7	1	63.7494	0.0854917	1.06808	0.0430653	1.06739	0.411747	CF42	PF44	21849.3	Ras-related C3 botulinum toxin substrate 1 OS=Homo sapiens OX=9606 GN=RAC1 PE=1 SV=1	1261.32	1327.61	1348.66	1312.53	3.11811	0.0347286	3	369	1203.66	1205.04	1280.27	1229.66	3.08978	0.0356535	43.8416	3	387	0.936861	-0.0940927
P15153;B1AH77;B1AH78;B1AH80	6	1	50.5599	0.0966279	1.0149	0.0468134	1.21382	0.380629	CF42	PF44	21828	Ras-related C3 botulinum toxin substrate 2 OS=Homo sapiens OX=9606 GN=RAC2 PE=1 SV=1	233.812	283.712	305.939	274.487	2.43852	0.134569	3	922	214.848	222.122	241.435	226.135	2.35437	0.0607601	13.74	3	996	0.823845	-0.279555
P61026;A0A2R8YFB8;G3V196;H0YMN7;H0YNE9;P59190;P59190-2;Q92930;A0A2R8YDI9;H0YL94;H0YLJ8	8	3	32.8934	0.686995	0.163046	0.201009	1.03166	0.0634054	PF44	CF42	22769.1	Ras-related protein Rab-10 OS=Homo sapiens OX=9606 GN=RAB10 PE=1 SV=1	594.057	503.816	579.777	559.217	2.74758	0.0867409	3	654	632.129	566.77	531.864	576.921	2.76112	0.0882231	50.8978	3	650	1.03166	0.0449659
Q15907;H3BMH2;H3BSC1;P62491;P62491-2;Q15907-2	5	3	30.182	0.759246	0.119617	0.216434	1.02409	0.0576681	PF44	CF42	24602.6	Ras-related protein Rab-11B OS=Homo sapiens OX=9606 GN=RAB11B PE=1 SV=4	628.598	702.341	715.098	682.012	2.83379	0.068468	3	567	680.684	772.961	641.672	698.439	2.84413	0.0965311	67.4211	3	578	1.02409	0.0343361
P51153;A0A087WWB9	3	1	29.1263	0.0464896	1.33264	0.0276177	1.43225	0.577127	CF42	PF44	23002.3	Ras-related protein Rab-13 OS=Homo sapiens OX=9606 GN=RAB13 PE=1 SV=1	500.729	441.507	440.769	461.001	2.6637	0.0746355	3	732	248.572	345.549	371.495	321.872	2.50768	0.201296	64.7916	3	861	0.698202	-0.518284
P61106;X6RFL8;A0A2R8Y7G7;A8MSP2;A8MTC6;A8MZI4;B7Z3L0;C9JB90;C9JFM7;G3V562;J3QSF4;M0R257;O95716;P20336;P20338;Q14964;Q6IQ22;Q86YS6;Q86YS6-2;Q96AX2;Q96AX2-2;Q96AX2-3;Q96AX2-4;Q96DA2;Q96E17;Q9H082	8	4	54.494	0.483125	0.31594	0.153791	1.07799	0.0928471	CF42	PF44	24125.1	Ras-related protein Rab-14 OS=Homo sapiens OX=9606 GN=RAB14 PE=1 SV=4	152.267	178.375	170.876	167.172	2.22316	0.0804077	3	1099	163.438	174.078	127.716	155.077	2.19055	0.156601	24.2852	3	1112	0.927649	-0.108349
P62820;E7END7;P62820-2;P62820-3	6	1	54.0377	0.894656	0.0483437	0.245853	1.01313	0.0514135	CF42	PF44	22905.9	Ras-related protein Rab-1A OS=Homo sapiens OX=9606 GN=RAB1A PE=1 SV=3	2841.97	2342.93	2357.29	2514.06	3.40038	0.11299	3	215	2425.55	2517.95	2500.91	2481.47	3.39471	0.019815	49.1703	3	223	0.987037	-0.0188243
Q9H0U4;E9PLD0;Q92928	7	2	61.821	0.509183	0.293126	0.159453	1.23568	0.0876211	CF42	PF44	22342.3	Ras-related protein Rab-1B OS=Homo sapiens OX=9606 GN=RAB1B PE=1 SV=1	534.348	1063.16	1042.28	879.931	2.94445	0.340329	3	485	764.223	717.114	654.966	712.101	2.85254	0.0769564	54.8007	3	570	0.809269	-0.305308
P61019;P61019-2;Q8WUD1;E9PKL7;H7C125;E9PE37;H0YD31;H0YDL5;Q8WUD1-2	7	3	43.5908	0.0327109	1.48531	0.0218764	1.17455	0.673816	CF42	PF44	23716.7	Ras-related protein Rab-2A OS=Homo sapiens OX=9606 GN=RAB2A PE=1 SV=1	979.068	841.55	958.716	926.445	2.96682	0.0801151	3	465	788.81	768.711	808.771	788.764	2.89695	0.0253939	20.0298	3	531	0.851388	-0.232111
C9JBG0;E7ES60;H7C0Y7;K7EIF2;Q96PJ7;Q9BZG1;Q9BZG1-2;Q9BZG1-4;C9JY26	3	1	12.3679	0.460721	0.336562	0.147204	1.49441	0.0978086	CF42	PF44	24082.6	Ras-related protein Rab-34_ isoform NARR (Fragment) OS=Homo sapiens OX=9606 GN=RAB34 PE=1 SV=8	32.935	70.1818	109.656	70.9243	1.8508	0.540943	3	1340	38.0734	40.7464	63.5596	47.4598	1.67633	0.295128	14.0067	3	1399	0.669162	-0.579574
P20337	3	1	21.6649	0.544078	0.264338	0.167619	1.12949	0.0814275	CF42	PF44	24986.1	Ras-related protein Rab-3B OS=Homo sapiens OX=9606 GN=RAB3B PE=1 SV=2	175.829	162.535	236.906	191.757	2.28275	0.20683	3	1051	195.752	118.161	195.405	169.773	2.22987	0.263276	44.697	3	1093	0.885355	-0.175672
P20339;P20339-2;F8VUA5;F8VVK3;F8VVZ0;F8VWU4	7	4	35.2856	0.000174751	3.75758	0.000704544	1.71141	1	CF42	PF44	23886.8	Ras-related protein Rab-5A OS=Homo sapiens OX=9606 GN=RAB5A PE=1 SV=2	1300.61	1379.67	1239.18	1306.49	3.1161	0.05391	3	370	773.091	727.027	790.077	763.398	2.88275	0.0427346	32.6235	3	545	0.584314	-0.775185
P61020;P61020-2	4	1	25.3366	0.0991737	1.0036	0.0477247	1.27045	0.374153	CF42	PF44	23935	Ras-related protein Rab-5B OS=Homo sapiens OX=9606 GN=RAB5B PE=1 SV=1	202.096	206.841	181.699	196.879	2.2942	0.0678524	3	1039	181.675	158.4	124.827	154.967	2.19024	0.184418	28.5789	3	1114	0.787122	-0.345341
P51148;P51148-2;K7ENY4;K7ERI8;K7ERQ8;K7EIP6	4	2	28.1703	0.0119192	1.92375	0.0108302	1.30714	0.897489	CF42	PF44	23710.7	Ras-related protein Rab-5C OS=Homo sapiens OX=9606 GN=RAB5C PE=1 SV=2	1013.48	942.111	981.409	979	2.99078	0.0365122	3	451	668.128	765.327	813.432	748.962	2.87446	0.0988317	74.0212	3	551	0.765028	-0.386416
C9IZZ0	8	1	66.1341	0.000174485	3.75824	0.000704544	2.80383	1	CF42	PF44	13246.2	Ras-related protein Rab-7a (Fragment) OS=Homo sapiens OX=9606 GN=RAB7A PE=1 SV=1	95.0582	94.8215	77.4957	89.1251	1.95	0.113011	3	1293	29.7716	32.0199	33.5691	31.7869	1.50225	0.0600704	1.90945	3	1448	0.356655	-1.4874
P51149;C9J592;C9J8S3;C9J4V0;C9J4S4;C9J7D1	15	6	82.3303	0.00250284	2.60157	0.00402077	1.13402	0.997898	CF42	PF44	23774.9	Ras-related protein Rab-7a OS=Homo sapiens OX=9606 GN=RAB7A PE=1 SV=1	2828.73	2864.54	2739.15	2810.81	3.44883	0.022978	3	188	2522.22	2497.48	2416.14	2478.62	3.39421	0.0223914	55.4997	3	224	0.881816	-0.18145
P61006;P61006-2	5	1	44.5702	0.1066	0.972244	0.0506364	2.34072	0.356432	CF42	PF44	23839.3	Ras-related protein Rab-8A OS=Homo sapiens OX=9606 GN=RAB8A PE=1 SV=1	225.129	196.191	114.418	178.579	2.25183	0.321526	3	1075	69.8354	30.0424	129	76.2925	1.88248	0.652668	49.7937	3	1305	0.427219	-1.22695
P62834	3	1	7.1544	0.0348204	1.45817	0.0226198	1.33263	0.656911	PF44	CF42	21329.4	Ras-related protein Rap-1A OS=Homo sapiens OX=9606 GN=RAP1A PE=1 SV=1	97.1123	131.85	112.338	113.767	2.05602	0.153056	3	1226	154.833	142.46	157.535	151.61	2.18073	0.0530175	8.03797	3	1121	1.33263	0.41428
P61224;P61224-3;P61224-4;A6NIZ1;B7ZB78;E7ESV4;F5GZG1;F5H7Y6;F5H823;P61224-2;A0A075B6Q0;F5GWU8;F5GX62;F5GYB5;F5GYH7;F5H004;F5H077;F5H0B7;F5H491;F5H4H0;F5H500;F5H6R7;F8WBC0	4	2	23.6182	0.232056	0.634407	0.0883934	1.08139	0.193839	PF44	CF42	21052.9	Ras-related protein Rap-1b OS=Homo sapiens OX=9606 GN=RAP1B PE=1 SV=1	2787.14	2683.73	2757.82	2742.89	3.43821	0.0194294	3	194	3247.85	2942.36	2708.16	2966.13	3.47219	0.0912392	270.627	3	184	1.08139	0.11288
P63244;J3KPE3;D6RAC2;D6RHH4;H0YAF8;D6REE5;H0Y8W2;D6R9L0;D6R9Z1;D6RFX4;H0YAM7;D6RAU2;D6RBD0;D6RFZ9;E9PD14;D6RF23;D6R909;D6RGK8;H0Y8R5;D6RHJ5;H0Y9P0;D6RDI0	19	9	136.322	0.000733074	3.13485	0.00183565	1.14305	0.999997	PF44	CF42	35533	Receptor of activated protein C kinase 1 OS=Homo sapiens OX=9606 GN=RACK1 PE=1 SV=3	2065.46	1987.33	2037.48	2030.09	3.30752	0.0194996	3	258	2321.57	2284.51	2355.37	2320.48	3.36558	0.0152722	35.4389	3	237	1.14305	0.192883
Q9BRX8;Q9BRX8-2	2	1	11.6364	0.497071	0.303581	0.156725	5.68326	0.0899815	CF42	PF44	25878.3	Redox-regulatory protein FAM213A OS=Homo sapiens OX=9606 GN=FAM213A PE=1 SV=3	7.84367	435.282	151.178	198.101	2.29689	1.09817	3	1035	43.4462	44.6814	16.4433	34.857	1.54229	0.457832	15.9586	3	1435	0.175955	-2.50672
Q15293;Q15293-2;E9PP27	9	6	45.8009	0.00735007	2.13371	0.00801427	1.29012	0.956536	PF44	CF42	38890	Reticulocalbin-1 OS=Homo sapiens OX=9606 GN=RCN1 PE=1 SV=1	491.579	574.133	550.063	538.592	2.73126	0.0788278	3	668	665.491	707.48	711.577	694.849	2.84189	0.0367097	25.5077	3	581	1.29012	0.367508
Q96D15;M0QZH0;M0QYB8;M0QZU3	7	5	39.208	0.0032828	2.48376	0.00465094	1.17906	0.994602	PF44	CF42	37493	Reticulocalbin-3 OS=Homo sapiens OX=9606 GN=RCN3 PE=1 SV=1	972.779	894.589	933.697	933.688	2.9702	0.0418715	3	461	1098.89	1082.22	1121.53	1100.88	3.04174	0.0179218	19.7298	3	421	1.17906	0.237643
Q9NQC3;Q9NQC3-2;Q9NQC3-5;F8W914;Q9NQC3-4;Q9NQC3-6;H7C106;Q9NQC3-3;A0A0U1RQR6	8	5	60.3357	0.00363112	2.43996	0.00485685	1.29878	0.992598	PF44	CF42	130331	Reticulon-4 OS=Homo sapiens OX=9606 GN=RTN4 PE=1 SV=2	4478.08	4355.79	4033.69	4289.19	3.63238	0.0535206	3	119	5640.58	5808.56	5263.04	5570.73	3.74591	0.0501525	279.386	3	95	1.29878	0.377161
Q08999;F5H837	2	1	7.9446	0.589101	0.22981	0.178678	1.34221	0.0746056	CF42	PF44	129793	Retinoblastoma-like protein 2 OS=Homo sapiens OX=9606 GN=RBL2 PE=1 SV=3	139.773	46.545	68.7231	85.0137	1.92949	0.572875	3	1306	66.2458	54.7817	68.9884	63.3386	1.80167	0.118985	7.53634	3	1352	0.74504	-0.42461
REVERSE10132	3	1	10.0135	0.367573	0.434657	0.125581	1.31974	0.124434	PF44	CF42	296716	Reversed Sequence 10132	158.442	82.0095	281.364	173.939	2.2404	0.578232	3	1085	255.666	175.545	257.45	229.553	2.36088	0.203793	46.7813	3	989	1.31974	0.400253
REVERSE10166	14	1	44.1456	0.00142837	2.84516	0.00281546	1.49943	0.99982	PF44	CF42	308264	Reversed Sequence 10166	559.199	627.457	599.129	595.262	2.77471	0.0576101	3	626	963.009	847.946	866.702	892.552	2.95063	0.0691655	61.7338	3	494	1.49943	0.584412
REVERSE10323	24	1	85.0619	0.0549353	1.26015	0.0312554	8.02444	0.530751	PF44	CF42	371073	Reversed Sequence 10323		25.5331		25.5331	1.4071	#DIV/0!	1	1475	68.865	44.7422	91.2814	68.2962	1.8344	0.340792	23.2748	3	1339	2.67481	1.41944
REVERSE10418	2	1	6.264	0.211025	0.675666	0.0828524	1.90605	0.210703	PF44	CF42	154179	Reversed Sequence 10418	46.843	25.5436	81.7169	51.3678	1.71069	0.552072	3	1403	127.23	117.139	49.3608	97.9098	1.99083	0.432503	42.3463	3	1254	1.90605	0.930588
REVERSE10491	1	1	4.958	0.715345	0.145485	0.207332	1.05999	0.0609282	PF44	CF42	27391.1	Reversed Sequence 10491	260.816	307.37	220.158	262.781	2.41959	0.166066	3	939	308.913	304.39	222.337	278.546	2.4449	0.174949	48.7315	3	918	1.05999	0.0840544
REVERSE10632	1	1	3.9105	0.119637	0.922136	0.0544654	1.18106	0.328955	PF44	CF42	165266	Reversed Sequence 10632	309.6	396.514	406.393	370.835	2.56918	0.143625	3	796	426.328	445.562	442.052	437.98	2.64145	0.0233873	10.2432	3	751	1.18106	0.240087
REVERSE10690	5	1	18.0064	0.143515	0.843102	0.0618732	2.60429	0.287868	CF42	PF44	295575	Reversed Sequence 10690	83.3652	138.89	74.8265	99.0273	1.99575	0.35127	3	1266	70.6992	36.3025	7.07231	38.0247	1.58007	0.837572	31.8484	3	1426	0.383982	-1.38089
REVERSE10913	2	1	6.864	0.24108	0.617839	0.0910007	1.22331	0.187311	PF44	CF42	204548	Reversed Sequence 10913	128.915	170.655	140.131	146.567	2.16604	0.147382	3	1150	213.67	180.673	143.55	179.298	2.25358	0.195653	35.0802	3	1072	1.22331	0.290795
REVERSE1097	4	1	13.3898	0.209588	0.678633	0.0824371	1.12299	0.211949	PF44	CF42	213222	Reversed Sequence 1097	216.776	256.888	217.096	230.254	2.36221	0.100181	3	984	233.947	281.69	260.079	258.572	2.41258	0.09246	23.9076	3	943	1.12299	0.167342
REVERSE11622	30	3	109.425	0.0208969	1.67992	0.0159578	2.48531	0.787141	CF42	PF44	291071	Reversed Sequence 11622	132.413	74.9099	98.4191	101.914	2.00823	0.283677	3	1257	27.5049	45.7963	49.7185	41.0066	1.61285	0.289127	11.8561	3	1415	0.402364	-1.31343
REVERSE1172	6	1	22.5814	0.144213	0.840997	0.0620495	1.83351	0.286814	CF42	PF44	228085	Reversed Sequence 1172	273.006	339.714	168.404	260.375	2.4156	0.331641	3	943	75.5892	195.472	154.965	142.009	2.15232	0.429428	60.9825	3	1148	0.545402	-0.874608
REVERSE11781	1	1	2.8238	0.00873776	2.0586	0.00875109	1.39007	0.939225	PF44	CF42	418580	Reversed Sequence 11781	1439.97	1220.92	1137.66	1266.18	3.1025	0.123328	3	379	1765.22	1761.42	1753.59	1760.08	3.24553	0.00336964	5.93083	3	299	1.39007	0.475155
REVERSE11843	5	2	22.5587	0.733724	0.134467	0.211518	1.02619	0.0594815	CF42	PF44	179341	Reversed Sequence 11843	3361.69	3623.11	3041.12	3341.97	3.524	0.0872235	3	168	3339.6	3474.08	2956.39	3256.69	3.51278	0.082483	268.621	3	167	0.97448	-0.0372952
REVERSE11966	4	1	17.5081	0.0152427	1.81694	0.0128725	1.42739	0.854417	PF44	CF42	93659.3	Reversed Sequence 11966	544.053	507.056	609.396	553.502	2.74312	0.0936228	3	656	686.548	827.542	856.104	790.065	2.89766	0.1149	90.7784	3	530	1.42739	0.513383
REVERSE12147	3	2	12.3857	0.19776	0.703861	0.0791231	1.31333	0.222722	CF42	PF44	125709	Reversed Sequence 12147	77.4856	121.319	109.659	102.821	2.01208	0.220796	3	1252	63.013	89.639	82.2189	78.2903	1.89371	0.175511	13.7408	3	1302	0.761422	-0.393232
REVERSE12372	1	1	3.7689	0.0772791	1.11194	0.0401009	1.58461	0.438122	CF42	PF44	72123	Reversed Sequence 12372	122.947	66.3799	85.7536	91.6936	1.96234	0.313519	3	1285	54.3336	59.5369	59.7249	57.8652	1.76242	0.052879	3.05985	3	1365	0.631071	-0.664125
REVERSE12414	5	1	18.8306	0.0380939	1.41914	0.0240217	2.99596	0.632326	CF42	PF44	204101	Reversed Sequence 12414	58.9298	37.5159	104.006	66.8173	1.82489	0.507947	3	1349	16.805	30.04	20.0623	22.3024	1.34835	0.309205	6.89602	3	1471	0.333783	-1.58302
REVERSE12450	3	1	12.0664	0.0961673	1.01697	0.0467349	1.10073	0.381824	PF44	CF42	74318	Reversed Sequence 12450	567.975	487.646	542.024	532.548	2.72636	0.0769773	3	672	586.892	582.586	589.098	586.192	2.76804	0.00564973	3.31183	3	640	1.10073	0.138462
REVERSE12573	1	1	3.9244	0.0583305	1.2341	0.0327972	6.38779	0.514189	CF42	PF44	193292	Reversed Sequence 12573	46.2165	35.4399	33.6244	38.4269	1.58464	0.177134	3	1436	15.205	2.84206		9.02352	0.955376	0.968791	8.7419	2	1505	0.234823	-2.09036
REVERSE12686	28	3	114.604	0.881827	0.0546165	0.242993	1.00663	0.0517828	CF42	PF44	360918	Reversed Sequence 12686	4776.03	5291.86	5283.37	5117.09	3.70902	0.0577275	3	100	5166.85	5018.22	5065.1	5083.39	3.70615	0.014947	75.9815	3	109	0.993415	-0.00953095
REVERSE12824	6	1	22.0837	0.0133326	1.87509	0.0117471	45.324	0.878948	CF42	PF44	181148	Reversed Sequence 12824	392.865	400.066	271.579	354.836	2.55003	0.203454	3	820	15.8631		7.62357	11.7433	1.06979	0.49613	5.82622	2	1500	0.033095	-4.91724
REVERSE12891	7	1	26.2599	0.0148802	1.82739	0.012734	1.14194	0.859014	CF42	PF44	113562	Reversed Sequence 12891	3695.24	3962.63	3686.29	3781.39	3.57765	0.0415254	3	147	3449.45	3199.25	3285.42	3311.38	3.52001	0.0383841	127.104	3	163	0.875704	-0.191485
REVERSE13308	5	1	20.6993	0.926035	0.0333726	0.252749	1.10801	0.0506937	PF44	CF42	161424	Reversed Sequence 13308	13.565	123.557	98.5264	78.5496	1.89514	0.733971	3	1327	190.262	45.9945	24.8434	87.0334	1.93969	1.03434	90.0223	3	1281	1.10801	0.147966
REVERSE13886	5	1	17.9599	0.193365	0.713623	0.0776877	1.28095	0.226977	PF44	CF42	148918	Reversed Sequence 13886	306.915	205.311	264.326	258.85	2.41305	0.197113	3	944	406.128	288.576	300.019	331.574	2.52058	0.195487	64.8186	3	847	1.28095	0.357214
REVERSE14001	41	1	152.979	0.00295388	2.52961	0.00434243	6.51767	0.996197	CF42	PF44	377445	Reversed Sequence 14001	221.558	254.428	426.191	300.726	2.47817	0.365423	3	891	42.0631	31.3446	65.0125	46.1401	1.66408	0.372783	17.2002	3	1404	0.153429	-2.70436
REVERSE1413	17	3	63.7354	0.202269	0.694071	0.08007	1.35768	0.218504	CF42	PF44	419488	Reversed Sequence 1413	106.198	110.223	70.5451	95.6552	1.98071	0.228309	3	1275	79.7586	52.2505	79.3555	70.4549	1.84791	0.223785	15.7667	3	1330	0.73655	-0.441145
REVERSE14288	4	1	15.7098	0.141286	0.8499	0.061157	1.46442	0.29129	PF44	CF42	97701.4	Reversed Sequence 14288	409.553	434.876	450.629	431.686	2.63517	0.0480051	3	745	807.391	662.293	426.826	632.17	2.80083	0.303814	192.062	3	614	1.46442	0.550331
REVERSE14365	2	1	7.3694	0.28521	0.544835	0.103312	2.63988	0.160206	PF44	CF42	105090	Reversed Sequence 14365	13.9345	14.6374	8.69656	12.4228	1.09422	0.261303	3	1505	45.2236	45.1728	7.98775	32.7947	1.5158	0.65509	21.4835	3	1443	2.63988	1.40047
REVERSE14963	20	2	76.7504	0.491254	0.308694	0.15546	1.22106	0.091157	CF42	PF44	262053	Reversed Sequence 14963	75.7907	45.2618	39.4513	53.5013	1.72836	0.364863	3	1396	48.4186	35.6572	47.3707	43.8155	1.64163	0.161693	7.08466	3	1410	0.818962	-0.288132
REVERSE14994	2	1	11.4623	0.00996824	2.00138	0.00971327	3.05771	0.923235	PF44	CF42	25704.2	Reversed Sequence 14994	24.6889	32.1455	49.7483	35.5276	1.55057	0.362184	3	1445	88.9819	140.141	96.7759	108.633	2.03596	0.253732	27.5636	3	1227	3.05771	1.61245
REVERSE15107	4	1	15.9129	0.0419713	1.37705	0.0258651	1.24535	0.60554	PF44	CF42	107652	Reversed Sequence 15107	186.252	199.828	174.681	186.92	2.27166	0.0673386	3	1059	221.13	214.805	262.409	232.781	2.36695	0.111059	25.8525	3	984	1.24535	0.316549
REVERSE15278	8	2	35.6983	0.102983	0.987234	0.0492682	1.85783	0.364854	CF42	PF44	253186	Reversed Sequence 15278	58.0892	108.323	89.0454	85.1526	1.9302	0.29761	3	1305	63.0224	27.4026	47.0784	45.8345	1.66119	0.389281	17.8425	3	1406	0.538263	-0.893618
REVERSE1556	21	2	76.1638	0.407017	0.390387	0.134091	2.23226	0.111804	CF42	PF44	272694	Reversed Sequence 1556	18.0476	118.794	85.2602	74.0341	1.86943	0.692965	3	1333	32.2984	32.2675	34.9304	33.1655	1.52069	0.0460894	1.52858	3	1442	0.447976	-1.15851
REVERSE15586	2	1	5.6015	0.231822	0.634845	0.0883934	1.15626	0.194014	CF42	PF44	104893	Reversed Sequence 15586	3418.25	3119.65	2870.5	3136.14	3.49639	0.0874475	3	176	2263.75	3143.82	2729.34	2712.3	3.43334	0.162328	440.283	3	201	0.864854	-0.209472
REVERSE16006	4	2	13.5498	0.000588769	3.23005	0.00158866	1.31486	0.999999	PF44	CF42	485826	Reversed Sequence 16006	338.343	340.554	330.576	336.491	2.52697	0.0155738	3	849	440.938	423.173	463.206	442.439	2.64585	0.0453359	20.0584	3	749	1.31486	0.39491
REVERSE162	2	1	9.634	0.705756	0.151345	0.204967	1.10927	0.0617319	CF42	PF44	26593.9	Reversed Sequence 162	93.4352	172.842	135.083	133.787	2.12641	0.296886	3	1181	104.245	109.013	148.567	120.608	2.08138	0.201731	24.3304	3	1200	0.901496	-0.149608
REVERSE16248	4	1	16.9616	0.993159	0.00298138	0.266347	1.0079	0.0500059	PF44	CF42	35926.9	Reversed Sequence 16248	395.87	465.283	379.766	413.64	2.61662	0.109863	3	755	383.709	362.553	504.463	416.909	2.62004	0.183634	76.5585	3	764	1.0079	0.0113567
REVERSE16413	3	1	13.7055	0.582548	0.234668	0.17694	1.40622	0.0755245	CF42	PF44	69353.5	Reversed Sequence 16413	27.2443	91.0339	83.8236	67.3673	1.82845	0.518561	3	1347	35.9795	35.2281	72.5118	47.9065	1.68039	0.44487	21.3122	3	1398	0.711124	-0.491827
REVERSE16594	9	1	30.4031	0.0116059	1.93532	0.010651	3.29895	0.901625	PF44	CF42	385973	Reversed Sequence 16594	36.9262	43.9767	49.7276	43.5435	1.63892	0.147248	3	1426	84.3567	156.39	190.197	143.648	2.1573	0.376325	54.0583	3	1145	3.29895	1.72201
REVERSE17047	9	1	29.2773	0.637012	0.195852	0.190643	1.21938	0.0685684	CF42	PF44	349980	Reversed Sequence 17047	19.2055	34.8085	49.7449	34.5863	1.5389	0.441531	3	1447	27.8051	15.6483	41.6381	28.3638	1.45276	0.458467	13.0039	3	1453	0.820089	-0.286147
REVERSE17083	5	2	18.5932	0.00643283	2.1916	0.00731026	1.12101	0.967227	PF44	CF42	177931	Reversed Sequence 17083	6310.98	6633.57	6586.05	6510.2	3.81359	0.0267512	3	79	7485.27	7311.44	7097.33	7298.01	3.8632	0.0266262	194.318	3	75	1.12101	0.164802
REVERSE17108	7	1	27.3915	0.0502564	1.29881	0.0294092	8.45039	0.555453	PF44	CF42	321009	Reversed Sequence 17108			25.4277	25.4277	1.40531	#DIV/0!	1	1476	59.5293	86.6989	68.6459	71.6247	1.85506	0.193056	13.8276	3	1325	2.8168	1.49406
REVERSE1751	15	1	60.1801	0.0184418	1.7342	0.0146817	25.975	0.815282	PF44	CF42	247324	Reversed Sequence 1751		13.6979		13.6979	1.13665	#DIV/0!	1	1503	89.923	93.1817	172.698	118.601	2.07409	0.395258	46.878	3	1207	8.65832	3.11409
REVERSE17731	8	1	27.2127	0.192246	0.716143	0.0775275	3.70839	0.228083	PF44	CF42	228271	Reversed Sequence 17731		48.5911	70.5212	59.5561	1.77493	0.260374	2	1375	152.836	170.303	118.576	147.238	2.16802	0.178719	26.3143	3	1133	2.47226	1.30583
REVERSE18317	2	1	7.9221	0.122108	0.913256	0.0552429	1.09701	0.324199	PF44	CF42	75569.3	Reversed Sequence 18317	828.169	954.123	908.068	896.787	2.95269	0.0710652	3	478	940.558	989.52	1021.28	983.786	2.9929	0.0413345	40.6643	3	462	1.09701	0.133579
REVERSE18379	15	2	60.6078	0.0210127	1.67752	0.0159613	1.33013	0.785856	PF44	CF42	252851	Reversed Sequence 18379	274.249	251.941	320.935	282.375	2.45083	0.124683	3	915	362.485	363.22	401.079	375.595	2.57472	0.0587682	22.073	3	799	1.33013	0.411564
REVERSE18438	20	5	70.9682	0.0599161	1.22246	0.0333836	1.10499	0.506811	PF44	CF42	396691	Reversed Sequence 18438	2069.03	1819.61	1990.44	1959.7	3.29219	0.0650727	3	267	2200.51	2146.41	2149.39	2165.44	3.33555	0.0140443	30.412	3	245	1.10499	0.144028
REVERSE18487	18	1	60.7035	0.0129367	1.88817	0.0115232	1.40267	0.884115	PF44	CF42	586664	Reversed Sequence 18487	166.953	210.715	207.251	194.973	2.28997	0.124775	3	1044	283.26	279.028	258.159	273.482	2.43693	0.0491373	13.4382	3	925	1.40267	0.488171
REVERSE18697	2	1	8.6452	0.0196422	1.70681	0.015298	2.45631	0.801313	PF44	CF42	79345.1	Reversed Sequence 18697	60.7073	76.7843	41.7279	59.7398	1.77626	0.293744	3	1373	103.894	174.041	162.284	146.74	2.16655	0.256021	37.5685	3	1134	2.45631	1.29649
REVERSE18737	4	1	14.5371	0.64786	0.188519	0.1927	1.18947	0.0673556	PF44	CF42	91895.2	Reversed Sequence 18737	56.7575	131.617	85.1773	91.1839	1.95992	0.414431	3	1287	61.7264	138.318	125.337	108.461	2.03527	0.377926	40.9901	3	1229	1.18947	0.250319
REVERSE18830	1	1	4.0514	0.0227932	1.6422	0.016663	1.68696	0.766557	CF42	PF44	103838	Reversed Sequence 18830	170.271	156.145	193.347	173.254	2.23868	0.108391	3	1087	98.5918	80.6194	128.896	102.702	2.01158	0.237575	24.3995	3	1242	0.592784	-0.754422
REVERSE1901	4	1	19.0377	0.220939	0.655727	0.0858822	1.28569	0.202446	CF42	PF44	116721	Reversed Sequence 1901	116.942	127.746	134.582	126.423	2.10183	0.0703545	3	1196	70.5421	87.6614	136.79	98.3312	1.99269	0.349724	34.3888	3	1253	0.777793	-0.362541
REVERSE19140	10	1	35.8934	0.00105977	2.97479	0.00229366	190.166	0.999965	PF44	CF42	442049	Reversed Sequence 19140		3.16992		3.16992	0.501048	#DIV/0!	1	1518	233.477	163.583	205.753	200.937	2.30306	0.175154	35.195	3	1041	63.3888	5.98616
REVERSE19443	17	1	58.7348	0.00264603	2.5774	0.00410227	1.33151	0.997419	PF44	CF42	384125	Reversed Sequence 19443	5104.93	5256.12	5164.37	5175.14	3.71392	0.0147183	3	97	7379.81	6908.75	6383.74	6890.77	3.83827	0.0723113	498.28	3	80	1.33151	0.413066
REVERSE19446	3	1	11.4696	0.0109591	1.96023	0.0102165	1.29683	0.910172	CF42	PF44	107795	Reversed Sequence 19446	142.156	169.526	149.846	153.843	2.18708	0.0917549	3	1133	124.403	116.136	115.351	118.63	2.0742	0.0422723	5.01477	3	1206	0.771113	-0.374987
REVERSE19573	10	1	36.6726	0.0556438	1.25458	0.0315644	8.67077	0.527206	PF44	CF42	399764	Reversed Sequence 19573	360.218	2.7889	12.6549	125.221	2.09768	1.62572	3	1199	1157.62	1170.68	928.982	1085.76	3.03573	0.125194	135.931	3	425	8.67077	3.11616
REVERSE19624	4	1	13.7841	0.722956	0.140888	0.208975	1.05676	0.0603144	PF44	CF42	123817	Reversed Sequence 19624	216.439	195.036	169.127	193.534	2.28676	0.122417	3	1047	163.095	224.893	225.571	204.52	2.31073	0.175419	35.8766	3	1031	1.05676	0.0796506
REVERSE19681	3	1	16.4388	0.0129494	1.88775	0.0115232	3.57659	0.88395	CF42	PF44	358116	Reversed Sequence 19681	95.5654	126.002	138.025	119.864	2.07869	0.182582	3	1212	36.1334	46.8771	17.5301	33.5135	1.52522	0.44304	14.8478	3	1440	0.279596	-1.83858
REVERSE19857	2	1	8.7673	0.69934	0.155312	0.203378	1.03975	0.0622889	CF42	PF44	86954.9	Reversed Sequence 19857	298.701	275.846	263.611	279.386	2.4462	0.0637495	3	917	262.132	216.335	327.645	268.704	2.42927	0.208204	55.9452	3	930	0.961767	-0.0562405
REVERSE20147	7	1	32.3509	0.177877	0.749881	0.0732414	1.45829	0.243198	PF44	CF42	322609	Reversed Sequence 20147	110.998	57.5108	63.8848	77.4645	1.8891	0.377141	3	1328	110.936	140.705	87.2555	112.965	2.05295	0.237085	26.7824	3	1217	1.45829	0.544274
REVERSE20274	4	1	13.5306	0.993171	0.00297599	0.266347	1.00058	0.0500059	CF42	PF44	293684	Reversed Sequence 20274	8648.62	7973.75	8203.38	8275.25	3.91778	0.0414642	3	59	8318.71	8023.29	8469.43	8270.48	3.91753	0.0274411	226.951	3	65	0.999423	-0.00083251
REVERSE20350	2	1	5.295	0.509428	0.292917	0.159453	2.25569	0.0875745	CF42	PF44	122288	Reversed Sequence 20350	992.853	818.621		905.737	2.957	0.136023	2	471	803.07			803.07	2.90475	#DIV/0!	#DIV/0!	1	525	0.886648	-0.173567
REVERSE20819	2	1	6.2817	0.360317	0.443315	0.123753	1.41227	0.127021	CF42	PF44	116188	Reversed Sequence 20819	193.483	137.758	167.706	166.316	2.22093	0.167683	3	1103	156.304	164.593	32.3985	117.765	2.07102	0.628758	74.0458	3	1209	0.708082	-0.498011
REVERSE21051	2	1	6.6123	0.351249	0.454385	0.121511	1.51699	0.130385	PF44	CF42	74970.9	Reversed Sequence 21051	66.4644	10.1667	124.047	66.8925	1.82538	0.851232	3	1348	69.8944	116.253	118.278	101.475	2.00636	0.269708	27.3687	3	1246	1.51699	0.601213
REVERSE21173	3	2	17.4074	0.0864768	1.0631	0.0434138	4.18797	0.408794	PF44	CF42	77729.1	Reversed Sequence 21173	140.643	123.924	144.869	136.479	2.13506	0.0811595	3	1171	1194.35	267.698	252.662	571.569	2.75707	0.943708	539.394	3	655	4.18797	2.06625
REVERSE21290	1	1	4.2718	0.165337	0.781631	0.0693376	2.19717	0.257937	CF42	PF44	80930.3	Reversed Sequence 21290	297.186	271.128	324.23	297.515	2.47351	0.0892472	3	897	399.705	6.51804		203.112	2.30773	1.36883	278.025	2	1034	0.682695	-0.550687
REVERSE21365	1	1	4.1693	0.0704229	1.15229	0.0375846	8.95226	0.462874	PF44	CF42	45817.1	Reversed Sequence 21365	19.7752		15.6015	17.6884	1.24769	0.166844	2	1498	73.4428	105.22	138.039	105.567	2.02353	0.305964	32.2997	3	1238	5.96818	2.57729
REVERSE21630	33	4	135.948	0.712986	0.146919	0.206927	1.10988	0.0611227	CF42	PF44	232916	Reversed Sequence 21630	1765.77	1732.5	690.07	1396.11	3.14492	0.438129	3	354	2385.38	746.32	641.982	1257.89	3.09964	0.77735	977.824	3	380	0.900997	-0.150406
REVERSE21799	7	1	28.2188	0.00163676	2.78601	0.00314707	1.72374	0.999649	CF42	PF44	101727	Reversed Sequence 21799	302.304	300.847	313.696	305.616	2.48518	0.0230214	3	883	152.942	189.514	189.438	177.298	2.2487	0.118967	21.0927	3	1076	0.580134	-0.785543
REVERSE22045	4	1	14.8679	0.232351	0.633856	0.0884031	45.4973	0.19362	CF42	PF44	76889	Reversed Sequence 22045		71.378	182.825	127.101	2.10415	0.620015	2	1192	5.58721			5.58721	0.747195	#DIV/0!	#DIV/0!	1	1513	0.0439587	-4.50771
REVERSE22112	1	1	2.9046	0.0103732	1.98409	0.00995031	4.64761	0.917906	CF42	PF44	106028	Reversed Sequence 22112	199.563	465.437	467.45	377.483	2.5769	0.408196	3	790	68.8437	65.092	109.727	81.221	1.90967	0.304827	24.7583	3	1294	0.215165	-2.21649
REVERSE22207	10	1	39.4931	0.119883	0.921241	0.0544654	1.13768	0.328474	PF44	CF42	236711	Reversed Sequence 22207	13517.3	12990.6	12770.6	13092.8	4.11703	0.0293059	3	41	16728.4	13662.1	14296.1	14895.5	4.17306	0.108669	1618.69	3	39	1.13768	0.186099
REVERSE22313	3	1	12.5514	0.0451276	1.34556	0.027107	1.81933	0.585399	PF44	CF42	171722	Reversed Sequence 22313	55.0416	113.754	76.6664	81.8208	1.91286	0.362914	3	1316	169.662	133.557	143.357	148.859	2.17277	0.125426	18.6708	3	1127	1.81933	0.863405
REVERSE22830	6	1	24.833	0.000850493	3.07033	0.00198103	1.29639	0.999991	PF44	CF42	202292	Reversed Sequence 22830	33126.6	31283.3	34286.8	32898.9	4.51718	0.0460406	3	13	43098.6	41704.9	43145.7	42649.7	4.62992	0.0191938	818.612	3	9	1.29639	0.374496
REVERSE23060	8	1	33.0491	0.00288377	2.54004	0.00429017	3.45179	0.996499	CF42	PF44	293589	Reversed Sequence 23060	88.8043	114.385	167.222	123.47	2.09156	0.323887	3	1204	34.209	36.8283	36.2726	35.77	1.55352	0.0385822	1.38008	3	1433	0.289705	-1.78734
REVERSE2309	3	1	10.7639	0.651667	0.185974	0.193398	1.11514	0.0669426	CF42	PF44	96053.8	Reversed Sequence 2309	144.128	177.708	249.009	190.282	2.2794	0.281471	3	1055	133.768	172.237	205.898	170.634	2.23207	0.211516	36.0919	3	1091	0.896745	-0.15723
REVERSE23327	7	1	25.4738	0.878882	0.0560693	0.242492	1.21872	0.0518738	PF44	CF42	234986	Reversed Sequence 23327	19.5782	11.7827	32.4217	21.2608	1.32758	0.490193	3	1488	4.24072	49.3333	24.1587	25.9109	1.41348	0.872115	22.5973	3	1459	1.21872	0.285361
REVERSE23438	4	1	16.021	0.0608652	1.21563	0.0337783	8.34354	0.502496	CF42	PF44	91619.1	Reversed Sequence 23438	105.245	64.3259	76.8334	82.1346	1.91453	0.255289	3	1313	22.8237	6.70858		14.7661	1.16927	0.771706	11.3951	2	1491	0.17978	-2.4757
REVERSE23552	7	1	24.7172	0.191135	0.71866	0.0772966	1.99103	0.229191	PF44	CF42	505458	Reversed Sequence 23552	35.0462	49.0275	28.8084	37.6273	1.5755	0.275166	3	1437	64.9124	122.747	37.0914	74.9171	1.87458	0.583253	43.6956	3	1313	1.99103	0.993513
REVERSE23828	8	1	26.0283	0.0159081	1.79838	0.0132269	1.14979	0.84606	PF44	CF42	227032	Reversed Sequence 23828	4215.93	4421.18	4675.85	4437.65	3.64715	0.0519194	3	113	4929.73	5138.28	5239.08	5102.36	3.70777	0.0309214	157.772	3	108	1.14979	0.201368
REVERSE23897	11	1	38.1872	0.557176	0.254008	0.170941	5.26584	0.0793161	PF44	CF42	343178	Reversed Sequence 23897		245.761	136.953	191.357	2.28184	0.402068	2	1052	3.22081	855.72	1156.37	671.77	2.82722	0.89045	598.177	3	587	3.51056	1.8117
REVERSE23960	2	1	6.9602	0.00399667	2.3983	0.00518478	1.56128	0.990163	PF44	CF42	69619.9	Reversed Sequence 23960	904.025	804.505	721.979	810.17	2.90858	0.112514	3	514	1319.9	1170.66	1304.15	1264.9	3.10206	0.0648251	81.9973	3	378	1.56128	0.642729
REVERSE24089	14	1	50.1409	0.00167753	2.77533	0.00321113	1.45398	0.999606	PF44	CF42	215579	Reversed Sequence 24089	205.326	234.704	206.146	215.392	2.33323	0.0776714	3	1008	300.163	326.018	313.349	313.177	2.49579	0.041281	12.9283	3	877	1.45398	0.540009
REVERSE24167	4	2	14.888	0.00668686	2.17478	0.00749999	1.93729	0.964345	CF42	PF44	260512	Reversed Sequence 24167	167.943	217.855	236.716	207.505	2.31703	0.171251	3	1022	105.929	121.423	93.9809	107.111	2.02983	0.128457	13.7591	3	1233	0.516185	-0.95404
REVERSE24171	4	4	13.8804	1.65068e-06	5.78234	3.5547e-05	1.22699	1	PF44	CF42	216336	Reversed Sequence 24171	50605.1	50026.6	50441.4	50357.7	4.70207	0.00592182	3	7	62182	61631.9	61550.5	61788.1	4.79091	0.00555911	343.487	3	6	1.22699	0.295118
REVERSE24388	4	1	13.7873	0.0776463	1.10988	0.0401946	1.69837	0.436871	CF42	PF44	102364	Reversed Sequence 24388	116.759	81.12	115.433	104.437	2.01886	0.193459	3	1248	74.678	70.1979	39.6024	61.4927	1.78882	0.310435	19.0895	3	1355	0.5888	-0.764151
REVERSE24475	4	1	11.7031	0.00281818	2.55003	0.00425066	10.5944	0.996768	PF44	CF42	539804	Reversed Sequence 24475	22.1487	8.94679	29.4227	20.1728	1.30477	0.514556	3	1490	172.132	255.738	213.283	213.718	2.32984	0.195609	41.805	3	1015	10.5944	3.40523
REVERSE24615	43	5	160.964	0.0106485	1.97271	0.0101019	1.52814	0.914275	PF44	CF42	594173	Reversed Sequence 24615	202.728	155.975	192.832	183.845	2.26445	0.134016	3	1064	308.748	272.678	261.395	280.941	2.44861	0.0880409	24.7343	3	916	1.52814	0.611774
REVERSE24657	8	1	26.9072	0.0686319	1.16347	0.0368571	3.01207	0.46981	CF42	PF44	428803	Reversed Sequence 24657	38.901	112.672	62.5613	71.378	1.85356	0.527716	3	1339	14.7763	41.2271	15.0885	23.6973	1.3747	0.640666	15.182	3	1467	0.331997	-1.59076
REVERSE24679	4	1	13.5176	0.00437878	2.35865	0.00553055	1.37224	0.987284	CF42	PF44	167681	Reversed Sequence 24679	7147.43	6796.72	6820.54	6921.57	3.8402	0.028313	3	70	4557.45	5123.86	5450.64	5043.98	3.70277	0.0895963	451.922	3	111	0.728734	-0.456535
REVERSE24783	4	1	18.2231	0.000348987	3.45719	0.00109713	684.074	1	PF44	CF42	116942	Reversed Sequence 24783		3.83407	1.03449	2.43428	0.38637	0.813221	2	1522	1134.35	1109.23	1086.87	1110.15	3.04538	0.0213926	23.7489	3	418	456.049	8.83305
REVERSE25451	4	1	17.1512	0.00295413	2.52957	0.00434243	2.03988	0.996196	PF44	CF42	203110	Reversed Sequence 25451	302.984	341.885	388.759	344.543	2.53724	0.124655	3	833	817.148	675.427	615.906	702.827	2.84685	0.147093	103.381	3	575	2.03988	1.02849
REVERSE25556	2	1	5.9781	0.00107387	2.96905	0.00231256	3.84391	0.999962	PF44	CF42	77890.6	Reversed Sequence 25556	34.0048	36.238	28.2521	32.8316	1.51629	0.125495	3	1453	118.306	160.466	99.8327	126.202	2.10107	0.246259	31.0784	3	1190	3.84391	1.94257
REVERSE25637	4	1	12.9691	0.100879	0.996201	0.048383	3.2346	0.369935	PF44	CF42	116730	Reversed Sequence 25637	32.4456	193.215	273.911	166.524	2.22148	0.738186	3	1101	362.849	532.516	720.548	538.638	2.7313	0.332187	178.928	3	675	3.2346	1.69359
REVERSE25675	4	1	16.4634	0.638119	0.195098	0.190725	1.06206	0.0684422	PF44	CF42	81020.4	Reversed Sequence 25675	98.1144	131.668	178.77	136.184	2.13413	0.297517	3	1172	148.387	136.43	149.088	144.635	2.16027	0.0491891	7.11448	3	1141	1.06206	0.0868587
REVERSE25734;A0A0D9SFI9;I3L4U9;Q8TAT6;Q8TAT6-2	10	1	40.1154	0.998072	0.000838136	0.267162	1.0023	0.0500005	CF42	PF44	289753	Reversed Sequence 25734	1490.88	1574.99	1783.77	1616.55	3.20859	0.0932867	3	313	1677.81	1576.41	1584.3	1612.84	3.20759	0.0349722	56.4046	3	319	0.997707	-0.00331194
REVERSE26067	2	1	8.4734	0.401412	0.39641	0.132683	1.20826	0.113464	PF44	CF42	70083.2	Reversed Sequence 26067	104.29	140.952	82.9286	109.39	2.03898	0.268268	3	1234	116.633	109.659	170.224	132.172	2.12114	0.250717	33.1378	3	1169	1.20826	0.272934
REVERSE26195	3	2	12.8906	0.0233876	1.63101	0.0169074	1.19153	0.760307	PF44	CF42	195939	Reversed Sequence 26195	1228.92	1147.67	1271.61	1216.07	3.08496	0.0517747	3	392	1485.79	1341.03	1520.12	1448.98	3.16106	0.0656	95.0532	3	337	1.19153	0.252817
REVERSE26203	1	1	3.9316	0.506165	0.295708	0.158894	1.03325	0.0881984	CF42	PF44	95130	Reversed Sequence 26203	109.038	60.4772		84.7574	1.92818	0.405126	2	1307	60.3166	33.5748	70.1687	54.6867	1.73788	0.346253	18.9354	3	1375	0.645214	-0.632149
REVERSE26301	2	1	7.1156	0.519156	0.284702	0.161859	1.04303	0.085762	PF44	CF42	74181.9	Reversed Sequence 26301	137.997	129.763	159.244	142.335	2.15331	0.106873	3	1162	151.746	151.448	142.184	148.459	2.17161	0.0366208	5.4367	3	1128	1.04303	0.0607798
REVERSE26641	5	1	17.0012	0.0150875	1.82138	0.0128257	2.58945	0.856382	CF42	PF44	200569	Reversed Sequence 26641	96.1309	102.998	53.0188	84.0491	1.92453	0.322329	3	1311	32.9617	36.452	27.961	32.4582	1.51132	0.131488	4.26786	3	1445	0.386182	-1.37265
REVERSE26684	15	1	50.3644	0.835042	0.0782917	0.233386	1.09718	0.0535108	CF42	PF44	227787	Reversed Sequence 26684	41.7322	17.4525	104.764	54.6496	1.73759	0.824641	3	1393	36.2422	43.9525	69.2322	49.809	1.69731	0.346466	17.2571	3	1390	0.911424	-0.133806
REVERSE26703	3	1	12.9275	0.084376	1.07378	0.0426529	5.55339	0.415143	CF42	PF44	269479	Reversed Sequence 26703	44.16	65.9673	36.5753	48.9009	1.68932	0.312034	3	1413	21.4827	4.9341		13.2084	1.12085	0.885922	11.7016	2	1495	0.270105	-1.88841
REVERSE26716	10	4	34.712	0.47006	0.327847	0.150076	1.04177	0.0956844	PF44	CF42	257131	Reversed Sequence 26716	1056.89	949.44	972.896	993.075	2.99698	0.0568888	3	445	963.099	1038.31	1102.26	1034.55	3.01475	0.0673292	69.6557	3	443	1.04177	0.0590357
REVERSE26756	8	1	25.9754	0.0818289	1.08709	0.041708	9.77925	0.423109	PF44	CF42	204122	Reversed Sequence 26756	30.3111		44.8427	37.5769	1.57492	0.273449	2	1438	251.144	228.41	255.395	244.983	2.38914	0.0592248	14.5091	3	960	6.5195	2.70476
REVERSE26791	11	2	42.0792	0.380747	0.419363	0.127219	1.19821	0.119958	PF44	CF42	310431	Reversed Sequence 26791	130.743	147.242	81.7876	119.924	2.07891	0.283863	3	1211	167.399	144.61	119.074	143.694	2.15744	0.168242	24.1754	3	1144	1.19821	0.260876
REVERSE26811	4	1	12.9781	0.065465	1.18399	0.0355106	1.61358	0.482603	CF42	PF44	234313	Reversed Sequence 26811	201.097	304.978	295.26	267.112	2.42669	0.214803	3	935	161.628	128.853	206.138	165.539	2.2189	0.234329	38.7907	3	1097	0.619739	-0.690268
REVERSE26889	11	2	39.7956	0.996588	0.00148426	0.266931	1.00084	0.0500015	PF44	CF42	397859	Reversed Sequence 26889	237.96	233.624	264.786	245.457	2.38997	0.0687674	3	961	241.92	266.934	228.137	245.664	2.39034	0.0800599	19.6678	3	958	1.00084	0.00121822
REVERSE26918	2	1	12.1778	0.004409	2.35566	0.00555244	2.71567	0.987043	CF42	PF44	102527	Reversed Sequence 26918	221.38	214.806	189.015	208.4	2.3189	0.0820862	3	1021	53.5524	82.882	93.7851	76.7398	1.88502	0.271147	20.8078	3	1304	0.368233	-1.44131
REVERSE26952	6	1	23.3449	0.106635	0.9721	0.0506364	3.52301	0.356352	CF42	PF44	83762.7	Reversed Sequence 26952	224.595	186.68	219.515	210.263	2.32276	0.0978809	3	1018	70.4349	101.575	7.03824	59.6828	1.77585	0.807216	48.177	3	1356	0.283848	-1.81681
REVERSE2705	8	1	32.3562	0.244366	0.61196	0.0916785	1.0471	0.185028	PF44	CF42	195922	Reversed Sequence 2705	2661.32	2388.3	2627.84	2559.15	3.4081	0.0581848	3	209	2679.11	2655.37	2704.58	2679.69	3.42808	0.00918499	24.6129	3	204	1.0471	0.0663965
REVERSE27122	3	1	12.4279	0.144128	0.84125	0.0620495	1.19178	0.28694	CF42	PF44	79541.8	Reversed Sequence 27122	265.742	206.414	249.407	240.521	2.38115	0.127414	3	969	214.098	179.146	212.206	201.817	2.30496	0.0973961	19.6562	3	1038	0.839082	-0.253116
REVERSE27220	6	1	25.9069	0.378431	0.422013	0.126642	1.04838	0.120725	PF44	CF42	98300.7	Reversed Sequence 27220	695.941	721.703	726.178	714.607	2.85407	0.022837	3	552	706.897	815.465	725.183	749.182	2.87459	0.077587	58.1268	3	550	1.04838	0.0681655
REVERSE28043	17	3	64.8157	6.51445e-05	4.18612	0.000418767	1.62739	1	CF42	PF44	434443	Reversed Sequence 28043	145.869	151.845	138.526	145.413	2.1626	0.0458766	3	1153	88.1885	88.9557	90.9159	89.3534	1.95111	0.015741	1.40651	3	1275	0.614479	-0.702564
REVERSE28124	12	2	43.3414	0.026116	1.58309	0.0185001	1.43911	0.73282	CF42	PF44	287382	Reversed Sequence 28124	584.37	473.656	442.55	500.192	2.69914	0.149024	3	697	305.337	369.346	368.025	347.569	2.54104	0.105245	36.5799	3	832	0.694872	-0.525182
REVERSE28187	8	2	32.0074	0.666786	0.176014	0.196699	1.11041	0.0653648	PF44	CF42	224534	Reversed Sequence 28187	90.7015	163.085	108.711	120.832	2.08218	0.311867	3	1209	95.5028	142.533	164.486	134.174	2.12767	0.262668	35.2432	3	1165	1.11041	0.151097
REVERSE2831	4	1	13.2524	0.00457551	2.33956	0.00572863	3.10819	0.985678	PF44	CF42	139397	Reversed Sequence 2831	46.873	46.7484	65.3022	52.9746	1.72407	0.201536	3	1398	219.816	144.132	130.016	164.655	2.21657	0.293277	48.2895	3	1099	3.10819	1.63607
REVERSE28326	13	2	44.0084	0.0013859	2.85827	0.00278926	2.95663	0.999846	CF42	PF44	314261	Reversed Sequence 28326	193.401	143.193	131.079	155.891	2.19282	0.211972	3	1126	58.4926	53.3764	46.3091	52.726	1.72202	0.116029	6.11772	3	1380	0.338223	-1.56395
REVERSE28341	9	2	30.882	0.85522	0.067922	0.237179	1.07538	0.0526909	CF42	PF44	224746	Reversed Sequence 28341	67.8054	108.455	139.304	105.188	2.02197	0.340922	3	1246	73.4011	101.677	118.366	97.8146	1.9904	0.232376	22.7298	3	1255	0.929901	-0.104851
REVERSE28374	2	1	12.6253	0.404541	0.393037	0.13341	1.03624	0.112532	PF44	CF42	136242	Reversed Sequence 28374	1010.24	1043.18	1074.95	1042.79	3.0182	0.0310281	3	436	1017.24	1085.08	1139.43	1080.58	3.03366	0.0566527	61.2179	3	429	1.03624	0.0513542
REVERSE28469	14	2	48.2953	0.974412	0.0112575	0.262296	1.00568	0.0500827	CF42	PF44	222930	Reversed Sequence 28469	4825.94	4412.92	3917.44	4385.43	3.64201	0.103723	3	117	4408.98	4342.72	4330.25	4360.65	3.63955	0.00970505	42.3203	3	124	0.994349	-0.00817614
REVERSE28806	2	1	6.6828	0.891742	0.0497606	0.245255	1.07394	0.0514935	CF42	PF44	173017	Reversed Sequence 28806	23.681	85.1525	68.4569	59.0968	1.77156	0.537875	3	1377	62.4793	52.3563	50.2488	55.0281	1.74058	0.118819	6.53836	3	1373	0.931153	-0.10291
REVERSE29224	9	2	31.2548	0.0920809	1.03583	0.0454762	1.0532	0.392758	PF44	CF42	210879	Reversed Sequence 29224	788.079	777.117	817.206	794.134	2.89989	0.0260895	3	519	819.489	866.761	822.897	836.382	2.9224	0.0315209	26.3635	3	511	1.0532	0.0747801
REVERSE29498	6	1	22.5405	0.0440502	1.35605	0.0267969	2.16629	0.592117	CF42	PF44	159201	Reversed Sequence 29498	553.704	461.544	454.424	489.89	2.6901	0.113043	3	705	305.355	252.364	120.708	226.142	2.35438	0.420423	95.0754	3	995	0.461618	-1.11523
REVERSE29574	10	1	38.844	0.153522	0.81383	0.0652724	1.53843	0.273389	PF44	CF42	162041	Reversed Sequence 29574	55.0489	131.325	117.071	101.148	2.00496	0.40094	3	1261	176.623	143.03	147.176	155.609	2.19204	0.117703	18.3157	3	1108	1.53843	0.621458
REVERSE29681	5	1	26.8127	0.0558425	1.25304	0.0316046	1.35778	0.52622	PF44	CF42	156476	Reversed Sequence 29681	101.926	103.42	98.5182	101.288	2.00556	0.0248042	3	1260	141.888	110.498	160.194	137.526	2.13839	0.182755	25.1336	3	1155	1.35778	0.441245
REVERSE29751	2	1	9.9947	0.413228	0.38381	0.135859	1.55043	0.110014	CF42	PF44	65925.3	Reversed Sequence 29751	170.46	52.1043	84.0043	102.19	2.00941	0.599255	3	1255	73.4826	73.6966	50.5527	65.9106	1.81896	0.201801	13.3008	3	1345	0.644984	-0.632665
REVERSE30081	1	1	4.1092	0.91342	0.0393294	0.250258	1.11709	0.0509521	PF44	CF42	88961.9	Reversed Sequence 30081	10.2868	77.6405	50.9004	46.2759	1.66535	0.732869	3	1421	64.9034	10.7199	79.4591	51.6941	1.71344	0.700725	36.2234	3	1383	1.11709	0.159739
REVERSE30121	2	1	8.1859	0.110401	0.957025	0.0519664	1.30162	0.347975	CF42	PF44	100478	Reversed Sequence 30121	251.167	360.662	308.018	306.616	2.48659	0.178598	3	880	250.918	203.814	251.962	235.565	2.37211	0.116749	27.502	3	981	0.768272	-0.38031
REVERSE30499	13	2	42.4119	0.416221	0.380676	0.136564	1.09541	0.109169	PF44	CF42	526830	Reversed Sequence 30499	278.169	348.798	344.954	323.974	2.51051	0.122585	3	859	310.991	358.824	394.838	354.884	2.55009	0.118524	42.0624	3	818	1.09541	0.131473
REVERSE30623	7	2	34.155	0.0083986	2.07579	0.00863459	1.23262	0.943548	CF42	PF44	74910	Reversed Sequence 30623	502.055	481.529	524.563	502.715	2.70132	0.0428171	3	694	414.31	428.812	380.403	407.842	2.61049	0.0609156	24.8439	3	776	0.811277	-0.301733
REVERSE31001	4	1	17.932	0.0351403	1.45419	0.022759	11.9048	0.654422	CF42	PF44	88276.7	Reversed Sequence 31001	79.2579	60.0564	39.8894	59.7346	1.77623	0.329562	3	1374		15.053		15.053	1.17762	#DIV/0!	#DIV/0!	1	1489	0.251999	-1.98851
REVERSE31350	1	1	3.757	0.0346108	1.46079	0.0225177	16.2112	0.658552	CF42	PF44	78954.1	Reversed Sequence 31350	141.002	223.756	223.768	196.175	2.29264	0.243566	3	1041			36.3035	36.3035	1.55995	#DIV/0!	#DIV/0!	1	1430	0.185057	-2.43396
REVERSE31762	3	3	12.0387	0.346461	0.460346	0.120338	1.20604	0.132222	CF42	PF44	98956.2	Reversed Sequence 31762	101.859	89.5263	75.8694	89.0848	1.9498	0.145932	3	1294	77.311	93.2495	51.0363	73.8656	1.86844	0.288585	21.3165	3	1318	0.82916	-0.270277
REVERSE31784	2	1	8.5959	0.167448	0.776121	0.0700183	1.28187	0.255343	CF42	PF44	97410.2	Reversed Sequence 31784	174.298	193.481	228.966	198.915	2.29867	0.139438	3	1034	153.984	120.845	190.698	155.176	2.19082	0.225175	34.9418	3	1110	0.780112	-0.358246
REVERSE32015	2	1	11.7834	0.0277737	1.55637	0.0193279	27.7701	0.717042	CF42	PF44	94093.5	Reversed Sequence 32015	402.265	345.059	346.37	364.565	2.56177	0.0895751	3	805	17.9188	21.4651		19.692	1.29429	0.127342	2.50761	2	1483	0.054015	-4.2105
REVERSE32745	10	1	36.7277	0.00179654	2.74556	0.00332085	1.35451	0.999461	CF42	PF44	143894	Reversed Sequence 32745	430.797	470.04	455.782	452.206	2.65534	0.0439267	3	735	326.692	355.304	319.557	333.851	2.52355	0.0566666	18.9182	3	844	0.738272	-0.437775
REVERSE32846	3	1	10.8287	0.856883	0.0670784	0.237391	1.85396	0.0526285	CF42	PF44	106057	Reversed Sequence 32846		57.8315	67.9993	62.9154	1.79876	0.114276	2	1362	36.493	31.3784		33.9357	1.53066	0.106572	3.61658	2	1438	0.539386	-0.890611
REVERSE3287	3	1	10.9678	0.0195217	1.70948	0.0152593	3.65928	0.802696	PF44	CF42	166420	Reversed Sequence 3287	12.9468	21.907	29.966	21.6066	1.33459	0.394025	3	1486	47.7579	79.9808	109.455	79.0645	1.89798	0.390298	30.8587	3	1300	3.65928	1.87156
REVERSE33535	7	3	30.0521	5.46206e-05	4.26264	0.000356436	1.28283	1	PF44	CF42	168694	Reversed Sequence 33535	190.674	189.724	196.698	192.365	2.28413	0.0196606	3	1049	250.304	246.397	243.616	246.772	2.3923	0.0136142	3.35962	3	956	1.28283	0.359332
REVERSE33819	24	1	93.8242	0.307523	0.512123	0.109734	1.52127	0.14894	PF44	CF42	295154	Reversed Sequence 33819	31.8171	173.27	160.236	121.774	2.08556	0.641986	3	1206	178.8	163.696	213.26	185.252	2.26776	0.137132	25.404	3	1066	1.52127	0.605278
REVERSE33917	13	1	55.8019	0.379978	0.420242	0.127061	1.08455	0.120211	CF42	PF44	342297	Reversed Sequence 33917	502.116	581.257	498.404	527.259	2.72202	0.088761	3	677	497.039	425.543	535.884	486.155	2.68677	0.115128	55.9699	3	720	0.922042	-0.117096
REVERSE34177	2	1	7.9031	0.00970397	2.01305	0.00949875	436.747	0.926699	CF42	PF44	239760	Reversed Sequence 34177	1011.41	8386.03	8367.53	5921.66	3.77244	0.718112	3	86	40.6757			40.6757	1.60933	#DIV/0!	#DIV/0!	1	1417	0.00686896	-7.18569
REVERSE34296	2	1	7.8759	0.486427	0.312982	0.154728	1.14828	0.0921538	CF42	PF44	72878.3	Reversed Sequence 34296	108.95	21.162		65.0558	1.81329	0.954184	2	1353	32.5875	26.0664	54.656	37.7699	1.57715	0.396686	14.9828	3	1427	0.580578	-0.784438
REVERSE34604	5	1	19.3206	0.0108505	1.96455	0.0101814	1.34554	0.911607	CF42	PF44	62443.5	Reversed Sequence 34604	1034.53	1122.32	1172.21	1109.69	3.0452	0.0628131	3	415	800.719	758.991	914.443	824.718	2.91631	0.0975566	80.4567	3	517	0.743197	-0.428183
REVERSE34768;G3V200;H0YH95;H0YHK3;O75334;O75334-2;O75334-3;O75334-4;O75334-5;O75334-6	7	1	26.6684	0.0862151	1.06442	0.043379	1.22897	0.409574	PF44	CF42	187012	Reversed Sequence 34768	465.086	515.253	465.792	482.044	2.68309	0.0596677	3	713	663.799	610.127	503.319	592.415	2.77263	0.137898	81.693	3	635	1.22897	0.297445
REVERSE34921	1	1	4.7801	0.000119351	3.92318	0.000550878	1.30978	1	PF44	CF42	67193.2	Reversed Sequence 34921	3516.73	3591.37	3549.88	3552.66	3.55055	0.0105265	3	154	4693.26	4500.74	4765.63	4653.21	3.66775	0.0294237	136.915	3	117	1.30978	0.389328
REVERSE35119	1	1	4.1042	0.0763854	1.11699	0.0397848	1.84596	0.441197	PF44	CF42	87533.5	Reversed Sequence 35119	77.8307	65.4361	143.287	95.5179	1.98008	0.437937	3	1276	205.041	131.461	192.466	176.322	2.24631	0.223211	39.3571	3	1077	1.84596	0.884374
REVERSE35129	11	1	43.6828	0.674856	0.170789	0.198269	1.01826	0.0645623	PF44	CF42	282050	Reversed Sequence 35129	314.129	321.053	322.084	319.088	2.50391	0.013558	3	863	318.544	348.089	308.115	324.916	2.51177	0.063816	20.7349	3	857	1.01826	0.0261118
REVERSE35180	4	1	20.101	0.931978	0.0305943	0.253568	1.09395	0.0505863	CF42	PF44	23959.8	Reversed Sequence 35180	192.257	410.772	465.681	356.236	2.55174	0.406023	3	819	349.102	346.763	281.065	325.643	2.51274	0.118606	38.6232	3	856	0.914121	-0.129543
REVERSE35188	6	1	22.3428	0.22961	0.639008	0.0880593	1.24087	0.195677	CF42	PF44	122605	Reversed Sequence 35188	275.85	240.241	246.137	254.076	2.40496	0.0751178	3	951	196.09	267.16	151.02	204.757	2.31124	0.285965	58.5533	3	1030	0.805887	-0.311351
REVERSE35236	5	2	18.7312	0.525325	0.279572	0.163232	1.03068	0.0846485	CF42	PF44	256500	Reversed Sequence 35236	257.644	268.839	240.33	255.604	2.40757	0.0561942	3	948	237.564	245.08	261.346	247.997	2.39445	0.0490182	12.1564	3	954	0.970238	-0.0435901
REVERSE35245	10	1	39.8402	0.211029	0.675658	0.0828524	1.19321	0.2107	PF44	CF42	244998	Reversed Sequence 35245	387.082	345.693	295.658	342.811	2.53505	0.133543	3	838	416.19	466.188	344.756	409.044	2.61177	0.149203	61.0309	3	773	1.19321	0.254844
REVERSE35346	1	1	4.1647	0.836709	0.0774253	0.233701	1.09021	0.0534387	CF42	PF44	65142.8	Reversed Sequence 35346	134.135	99.6631	202.054	145.284	2.16222	0.358592	3	1154	142.452	135.542	121.795	133.263	2.12471	0.0789044	10.515	3	1167	0.917257	-0.124601
REVERSE35426	4	1	17.9972	0.764682	0.116519	0.217246	1.07887	0.0573101	CF42	PF44	261909	Reversed Sequence 35426	333.494	85.6739	83.495	167.554	2.22416	0.857704	3	1097	154.297	170.15	141.469	155.306	2.19119	0.0925088	14.3671	3	1109	0.926897	-0.109519
REVERSE3557	1	1	4.661	0.0248523	1.60463	0.0177803	1.64356	0.74531	CF42	PF44	72722.2	Reversed Sequence 3557	230.643	192.049	240.325	221.006	2.3444	0.115563	3	999	143.012	157.222	103.169	134.467	2.12862	0.208387	28.0212	3	1162	0.608435	-0.716826
REVERSE35689	3	2	11.3586	0.541832	0.266135	0.167166	1.59645	0.0818008	CF42	PF44	141664	Reversed Sequence 35689	74.632	22.0064	98.1321	64.9235	1.8124	0.600405	3	1355	45.8858	23.4954	52.6211	40.6674	1.60925	0.374942	15.2479	3	1418	0.62639	-0.674868
REVERSE35692	2	1	7.7226	0.0650855	1.18652	0.0354008	10.9108	0.484184	CF42	PF44	88696.9	Reversed Sequence 35692	217.382	102.225	154.453	158.02	2.19871	0.3649	3	1122	27.1232		16.3255	21.7243	1.33695	0.351457	7.63517	2	1473	0.137478	-2.86272
REVERSE35776	17	2	57.9955	0.0888274	1.05145	0.0444338	1.93724	0.401913	CF42	PF44	562525	Reversed Sequence 35776	321.631	718.193	713.026	584.283	2.76662	0.389329	3	635	309.626	292.754	302.438	301.606	2.47944	0.0280712	8.46645	3	888	0.516198	-0.954003
REVERSE35976	2	1	7.6583	0.0760243	1.11905	0.0396888	1.60814	0.442452	PF44	CF42	213453	Reversed Sequence 35976	384.967	386.541	200.762	324.09	2.51067	0.329564	3	858	511.415	526.059	526.076	521.183	2.71699	0.0162322	8.45997	3	697	1.60814	0.685396
REVERSE35987	9	1	35.7339	0.757459	0.120641	0.216335	1.07671	0.0577879	CF42	PF44	224989	Reversed Sequence 35987	66.4973	109.112	66.8032	80.8042	1.90743	0.303397	3	1320	104.386	65.7832	54.9738	75.0476	1.87534	0.346128	25.9761	3	1312	0.928759	-0.106624
REVERSE3607	24	3	87.8248	0.013855	1.85839	0.0120699	1.21788	0.872167	CF42	PF44	569701	Reversed Sequence 3607	998.766	942.73	952.872	964.79	2.98443	0.0309482	3	454	863.307	753.115	760.147	792.19	2.89883	0.0778724	61.6897	3	529	0.821101	-0.284369
REVERSE36363	8	1	29.6278	0.0701253	1.15413	0.0374722	2.95426	0.464012	PF44	CF42	323945	Reversed Sequence 36363	132.445	23.5982	96.8695	84.3043	1.92585	0.658338	3	1308	229.613	243.993	273.565	249.057	2.3963	0.0899759	22.4091	3	953	2.95426	1.5628
REVERSE365	3	1	11.3011	0.825645	0.0832065	0.231309	1.05005	0.0539322	PF44	CF42	146432	Reversed Sequence 365	285.066	305.833	257.89	282.93	2.45168	0.0849778	3	914	233.079	288.38	369.814	297.091	2.47289	0.23152	68.7823	3	895	1.05005	0.0704603
REVERSE36521	2	1	7.8513	0.0121694	1.91473	0.0109881	2.03869	0.894191	PF44	CF42	101389	Reversed Sequence 36521	62.8554	88.9664	112.483	88.1016	1.94498	0.281779	3	1297	179.144	185.783	173.908	179.612	2.25433	0.0331331	5.9511	3	1070	2.03869	1.02764
REVERSE36638	10	1	33.8663	0.0190339	1.72047	0.0149868	1.49417	0.808341	PF44	CF42	99814.2	Reversed Sequence 36638	266.15	276.287	356.549	299.662	2.47663	0.165273	3	892	401.384	459.613	482.241	447.746	2.65103	0.0931654	41.7144	3	746	1.49417	0.579344
REVERSE37037	6	1	21.312	0.427524	0.36904	0.139073	1.14163	0.106074	CF42	PF44	107447	Reversed Sequence 37037	55.285	80.6046	58.8867	64.9254	1.81241	0.210972	3	1354	52.9432	66.3306	51.3383	56.8707	1.75489	0.144744	8.2317	3	1368	0.875939	-0.191098
REVERSE37508	2	1	8.0239	0.00686918	2.1631	0.00762505	2.99214	0.962237	CF42	PF44	121190	Reversed Sequence 37508	1376.29	1307.52	1346.77	1343.53	3.12825	0.0256768	3	363	653.643	307.35	386.067	449.02	2.65227	0.404273	181.527	3	744	0.334209	-1.58118
REVERSE37631	1	1	4.5501	0.992394	0.00331583	0.266347	1.00322	0.0500073	CF42	PF44	48502.9	Reversed Sequence 37631	215.309	196.954	172.733	194.999	2.29003	0.109517	3	1043	209.605	183.283	190.231	194.373	2.28864	0.0701783	13.6408	3	1053	0.996791	-0.00463654
REVERSE37840	5	1	18.8735	0.0210083	1.67761	0.0159613	21.155	0.785905	CF42	PF44	152132	Reversed Sequence 37840	167.313	144.553	73.5212	128.462	2.10878	0.380831	3	1188		2.45376	15.7636	9.10867	0.959455	1.03324	9.41147	2	1504	0.0709053	-3.81796
REVERSE37974	6	1	25.0198	0.336407	0.473135	0.117509	12.7735	0.136224	CF42	PF44	200318	Reversed Sequence 37974	12.8225	1106.27	825.884	648.325	2.81179	0.876006	3	593	77.8832	52.046	22.3375	50.7555	1.70548	0.547631	27.7953	3	1386	0.0782871	-3.67508
REVERSE38020	3	1	11.9104	0.34338	0.464225	0.119557	1.16981	0.133427	PF44	CF42	117128	Reversed Sequence 38020	146.997	147.129	113.53	135.885	2.13317	0.142473	3	1173	126.311	183.385	167.184	158.96	2.20129	0.185031	29.4125	3	1102	1.16981	0.226272
REVERSE38334	16	2	56.3006	0.263511	0.579202	0.097335	1.2882	0.172628	CF42	PF44	434061	Reversed Sequence 38334	47.6328	69.3174	85.873	67.6078	1.83	0.283656	3	1346	51.3268	52.0232	54.0971	52.4824	1.72001	0.027458	1.44106	3	1381	0.776277	-0.365356
REVERSE38380	11	3	44.3851	0.00364768	2.43798	0.00486389	1.55708	0.992495	PF44	CF42	176947	Reversed Sequence 38380	122.518	130.226	135.969	129.571	2.11251	0.052087	3	1186	211.642	217.179	176.436	201.752	2.30482	0.109533	22.0986	3	1039	1.55708	0.638843
REVERSE38409	27	3	90.3729	0.0116477	1.93376	0.010651	1.12882	0.901072	PF44	CF42	533787	Reversed Sequence 38409	5854.92	5546.52	5973.08	5791.51	3.76279	0.0380274	3	90	6722.5	6539.37	6350.82	6537.56	3.81542	0.0284275	185.846	3	82	1.12882	0.174814
REVERSE38428	2	1	6.1575	0.0905975	1.04288	0.0450056	1.39434	0.396881	PF44	CF42	112201	Reversed Sequence 38428	140.247	161.414	183.368	161.676	2.20865	0.133363	3	1115	275.31	221.367	179.617	225.431	2.35301	0.212818	47.9759	3	998	1.39434	0.47958
REVERSE38539	3	1	11.8304	0.00276924	2.55764	0.00422943	1.85918	0.996962	PF44	CF42	239343	Reversed Sequence 38539	359.095	318.362	261.624	313.027	2.49558	0.15639	3	869	554.992	587.882	603.048	581.974	2.7649	0.0422125	24.5666	3	644	1.85918	0.894667
REVERSE38947	2	1	6.2819	0.122667	0.911274	0.0554374	1.28389	0.323141	CF42	PF44	118439	Reversed Sequence 38947	95.9256	99.137	112.863	102.642	2.01133	0.0876482	3	1254	99.9853	65.4251	74.4276	79.946	1.9028	0.224262	17.9288	3	1298	0.778882	-0.360523
REVERSE39362	4	1	14.7007	0.000863012	3.06398	0.00199836	1.38018	0.99999	PF44	CF42	185959	Reversed Sequence 39362	660.313	701.552	676.072	679.312	2.83207	0.0306339	3	568	879.955	970.316	962.456	937.576	2.97201	0.0533883	50.0555	3	479	1.38018	0.46486
REVERSE39568	5	1	17.3907	0.776162	0.110048	0.220217	1.02606	0.0565856	PF44	CF42	94960.2	Reversed Sequence 39568	243.798	209.931	253.144	235.624	2.37222	0.0964936	3	976	265.087	244.812	215.393	241.764	2.38339	0.103353	24.9869	3	968	1.02606	0.0371098
REVERSE39695	21	3	73.1947	0.0297335	1.52675	0.0203594	1.68297	0.699234	CF42	PF44	482692	Reversed Sequence 39695	126.355	208.38	144.556	159.763	2.20348	0.269619	3	1119	97.2871	91.625	95.8757	94.9293	1.9774	0.0310472	2.94729	3	1262	0.594186	-0.751012
REVERSE39708	8	1	31.6443	0.0145248	1.83789	0.0125115	2.19531	0.863549	CF42	PF44	237192	Reversed Sequence 39708	521.982	544.831	656.945	574.586	2.75936	0.125715	3	642	176.563	321.674	286.962	261.733	2.41786	0.289509	75.774	3	937	0.455516	-1.13443
REVERSE3972	9	2	33.8131	0.073728	1.13237	0.0389146	1.57282	0.450601	CF42	PF44	195703	Reversed Sequence 3972	226.104	400.644	337.383	321.377	2.50701	0.274954	3	862	205.121	222.906	184.97	204.332	2.31034	0.0928881	18.98	3	1032	0.635802	-0.653349
REVERSE39758	10	1	37.082	0.00187559	2.72686	0.00342292	30.7677	0.999348	PF44	CF42	219290	Reversed Sequence 39758	28.8958	5.20178	9.91047	14.6693	1.16641	0.855075	3	1502	402.757	513.042	438.226	451.342	2.65451	0.12474	56.3004	3	742	30.7677	4.94334
REVERSE39827	11	1	41.3	0.000342585	3.46523	0.00109713	1.29679	1	PF44	CF42	195220	Reversed Sequence 39827	6952.42	7039.05	7293.38	7094.95	3.85095	0.0249779	3	68	9530.19	9058.52	9013.34	9200.68	3.96382	0.0311122	286.254	3	60	1.29679	0.374948
REVERSE39846	12	1	38.3885	0.0330955	1.48023	0.022031	14.8281	0.670668	PF44	CF42	436224	Reversed Sequence 39846	18.637	5.40589		12.0214	1.07996	0.778258	2	1507	81.333	134.207	140.97	118.837	2.07495	0.274787	32.6548	3	1205	9.88541	3.3053
REVERSE39970	45	6	170.321	0.432892	0.363621	0.140289	1.41642	0.104657	CF42	PF44	455269	Reversed Sequence 39970	1730.48	1881.97	707.685	1440.05	3.15838	0.443563	3	341	2015.2	679.308	355.54	1016.68	3.00719	0.865328	879.763	3	449	0.706007	-0.502246
REVERSE40003	3	2	10.6155	1.25141e-05	4.9026	0.000128328	2.10772	1	CF42	PF44	107758	Reversed Sequence 40003	351.566	366.353	357.827	358.582	2.55459	0.0206999	3	817	175.04	161.491	173.853	170.128	2.23078	0.0441051	7.50351	3	1092	0.474446	-1.07568
REVERSE4046	5	2	17.4266	0.0316673	1.49939	0.0214112	1.54539	0.68251	PF44	CF42	177608	Reversed Sequence 4046	171.734	143.482	195.294	170.17	2.23088	0.152443	3	1090	314.547	249.758	224.634	262.98	2.41992	0.176408	46.3917	3	936	1.54539	0.627973
REVERSE40622	5	1	21.0948	0.266304	0.574623	0.0980892	8.21001	0.170938	CF42	PF44	197609	Reversed Sequence 40622	6.05588	207.427	129.309	114.264	2.05791	0.888513	3	1224	9.68978	7.72644	24.3367	13.9176	1.14357	0.652152	9.07642	3	1493	0.121803	-3.03738
REVERSE40643	2	1	6.975	0.0226185	1.64554	0.0165675	1.19809	0.768412	PF44	CF42	140287	Reversed Sequence 40643	459.704	494.951	510.115	488.257	2.68865	0.0529704	3	709	602.202	540.33	612.401	584.978	2.76714	0.0666713	39.0012	3	642	1.19809	0.260742
REVERSE40823	4	1	14.9427	0.038405	1.41561	0.0241825	1.12235	0.630087	PF44	CF42	213079	Reversed Sequence 40823	22683.5	25654.6	23895.2	24077.7	4.38162	0.0620461	3	19	27784.3	26599.7	26687	27023.7	4.43174	0.024429	660.161	3	19	1.12235	0.166523
REVERSE41028	2	1	6.9682	0.0569982	1.24414	0.0322163	9.61576	0.520561	CF42	PF44	102430	Reversed Sequence 41028	148.836	134.556	119.79	134.394	2.12838	0.108069	3	1178	7.23442	34.6949		20.9647	1.32149	0.926202	19.4175	2	1475	0.155994	-2.68044
REVERSE41084	2	1	7.2107	0.00056034	3.25155	0.00153717	1.14986	1	PF44	CF42	203553	Reversed Sequence 41084	182.298	180.019	177.15	179.822	2.25484	0.014347	3	1073	211.409	204.865	204.038	206.771	2.31549	0.0195296	4.03814	3	1023	1.14986	0.20146
REVERSE41587	1	1	4.9164	0.126796	0.896894	0.0567676	1.26663	0.315525	CF42	PF44	34470.6	Reversed Sequence 41587	216.7	229.081	216.831	220.871	2.34414	0.0321947	3	1001	199.74	132.543	190.848	174.377	2.24149	0.209324	36.5012	3	1081	0.789498	-0.340993
REVERSE41598	4	1	16.137	0.00307088	2.51274	0.00445324	110.577	0.995664	CF42	PF44	132681	Reversed Sequence 41598	231.434	203.904	201.043	212.127	2.3266	0.0791083	3	1014			5.75508	5.75508	0.760051	#DIV/0!	#DIV/0!	1	1512	0.0271303	-5.20395
REVERSE4248	7	1	23.9548	0.000740177	3.13066	0.00184272	1.13052	0.999997	PF44	CF42	522161	Reversed Sequence 4248	11699.9	11898.5	12119.4	11905.9	4.07576	0.0176215	3	45	13684.5	13372.5	13322.6	13459.9	4.12904	0.0145693	196.101	3	41	1.13052	0.176981
REVERSE4294	1	1	3.7528	0.37573	0.425124	0.126032	1.66302	0.12163	CF42	PF44	52847.5	Reversed Sequence 4294	99.6246	35.8329	25.8219	53.7598	1.73046	0.744688	3	1394	23.5037		73.4761	48.4899	1.68565	0.728725	35.3358	2	1393	0.901974	-0.148843
REVERSE4418	11	4	36.4579	1.49181e-06	5.82629	3.38165e-05	2.27192	1	PF44	CF42	285338	Reversed Sequence 4418	4870.78	4676.77	4762.5	4770.01	3.67852	0.0203819	3	105	11126.1	10779.9	10605.2	10837.1	4.03491	0.0244659	265.138	3	53	2.27192	1.18391
REVERSE44598	1	1	5.1312	0.515623	0.287668	0.161158	1.15041	0.086412	CF42	PF44	4858.53	Reversed Sequence 44598	257.983	224.65	348.061	276.898	2.44232	0.230564	3	920	202.163	189.341	330.582	240.695	2.38147	0.324508	78.1075	3	971	0.869254	-0.20215
REVERSE44715	2	1	8.2176	0.012584	1.90018	0.0112679	3.79987	0.888739	CF42	PF44	89615.1	Reversed Sequence 44715	43.7826	82.0563	44.0911	56.6433	1.75315	0.38855	3	1386	22.3235	11.8948	10.5017	14.9067	1.17338	0.433418	6.46081	3	1490	0.263167	-1.92595
REVERSE4838	3	1	14.2024	0.0187896	1.72608	0.0148488	1.57325	0.811193	PF44	CF42	76263.6	Reversed Sequence 4838	53.5491	49.3491	65.8579	56.252	1.75014	0.152526	3	1392	84.0286	103.067	78.4004	88.4985	1.94694	0.146063	12.9263	3	1279	1.57325	0.653748
REVERSE485	4	1	12.5291	0.0219929	1.65772	0.0162628	1.10664	0.775123	PF44	CF42	128315	Reversed Sequence 485	20327.7	19836.3	20580.9	20248.3	4.30639	0.0186981	3	24	23564.5	21821.2	21837.3	22407.6	4.3504	0.0447109	1001.87	3	23	1.10664	0.146188
REVERSE4917	6	1	29.9015	0.039775	1.40039	0.0248274	2.15829	0.620419	PF44	CF42	190572	Reversed Sequence 4917	296.084	120.358	159.436	191.959	2.28321	0.480661	3	1050	351.453	429.135	462.326	414.305	2.61732	0.13735	56.9047	3	767	2.15829	1.10989
REVERSE50298	3	1	11.6554	0.313333	0.503994	0.111324	1.38731	0.146225	CF42	PF44	94469.6	Reversed Sequence 50298	72.486	89.4454	133.67	98.5339	1.99359	0.320584	3	1267	41.7904	76.3321	94.9529	71.0252	1.85141	0.379804	26.9757	3	1327	0.72082	-0.47229
REVERSE5084	10	1	33.8293	0.752483	0.123503	0.215486	1.05665	0.0581271	PF44	CF42	383041	Reversed Sequence 5084	485.62	432.017	493.295	470.311	2.67238	0.0709835	3	724	423.624	448.057	619.174	496.952	2.69631	0.214408	106.55	3	713	1.05665	0.0794913
REVERSE5092	14	1	51.0223	0.119347	0.923188	0.0544514	2.90972	0.329521	CF42	PF44	351120	Reversed Sequence 5092	169.381	36.5672	88.4696	98.1394	1.99184	0.68202	3	1270	35.9096	28.4145	36.8604	33.7282	1.52799	0.137164	4.62629	3	1439	0.343676	-1.54088
REVERSE5121	3	1	10.5012	0.16235	0.789548	0.0683512	1.94651	0.261689	PF44	CF42	64060.1	Reversed Sequence 5121	8.08094	12.7535	48.6018	23.1454	1.36447	0.957829	3	1483	45.4871	55.176	34.4955	45.0529	1.65372	0.229665	10.3471	3	1407	1.94651	0.960892
REVERSE5201	3	1	11.7325	0.426334	0.37025	0.138791	1.09287	0.106393	CF42	PF44	49040.7	Reversed Sequence 5201	340.918	318.868	287.815	315.867	2.4995	0.0844607	3	867	237.539	325.975	303.565	289.026	2.46094	0.159071	45.9759	3	908	0.915026	-0.128116
REVERSE5376	1	1	3.9073	0.182255	0.739322	0.0743334	1.31919	0.238406	PF44	CF42	134362	Reversed Sequence 5376	211.702	159.725	199.306	190.244	2.27931	0.142697	3	1056	295.161	271	186.744	250.968	2.39962	0.226788	56.9166	3	951	1.31919	0.39965
REVERSE56452	19	2	71.4305	0.637403	0.195586	0.190643	1.03767	0.0685237	PF44	CF42	350266	Reversed Sequence 56452	122.163	112.893	136.273	123.776	2.09264	0.0951197	3	1201	116.029	134.538	134.751	128.439	2.1087	0.0836841	10.7483	3	1185	1.03767	0.0533513
REVERSE56717	5	2	17.1103	0.0815644	1.0885	0.0416225	5.96069	0.423954	PF44	CF42	357758	Reversed Sequence 56717		36.7906	5.67395	21.2323	1.327	1.03629	2	1489	83.9703	89.105	80.0429	84.3727	1.9262	0.0538616	4.54445	3	1287	3.9738	1.99052
REVERSE5696	2	1	7.4759	0.389528	0.409462	0.12955	1.38474	0.117123	CF42	PF44	134827	Reversed Sequence 5696	79.1261	82.0462	49.5683	70.2468	1.84663	0.255778	3	1341		49.2636	102.924	76.0938	1.88135	0.498642	37.9435	2	1306	1.08323	0.115345
REVERSE5705	12	3	47.0206	0.130621	0.883987	0.0580576	4.24781	0.308767	PF44	CF42	379760	Reversed Sequence 5705	40.0205	21.7441	30.3645	30.7097	1.48728	0.297728	3	1460	286.326	56.9766	48.044	130.449	2.11544	1.03541	135.068	3	1178	4.24781	2.08672
REVERSE6226	18	4	71.4401	0.931553	0.0307924	0.253568	1.01979	0.0505937	CF42	PF44	524533	Reversed Sequence 6226	3160.37	3125.68	266.184	2184.08	3.33927	0.76052	3	245	4244.27	1695.43	485.415	2141.71	3.33076	0.8959	1918.76	3	247	0.980598	-0.0282657
REVERSE6280	21	1	77.9537	0.00303368	2.51803	0.00442621	12.8443	0.995838	PF44	CF42	479975	Reversed Sequence 6280	24.623	15.0274	6.42549	15.3586	1.18635	0.592714	3	1499	155.744	253.549	182.518	197.27	2.29506	0.256217	50.5439	3	1051	12.8443	3.68305
REVERSE6567	21	1	85.2737	0.436283	0.360231	0.14107	1.16023	0.103778	PF44	CF42	474080	Reversed Sequence 6567	138.1		156.841	147.471	2.16871	0.0898601	2	1149	121.635	104.538	116.027	114.067	2.05716	0.0764036	8.7151	3	1216	0.773485	-0.370554
REVERSE6664	4	1	28.2386	8.49044e-06	5.07107	0.000104222	2.48918	1	CF42	PF44	47038.3	Reversed Sequence 6664	788.611	761.701	815.148	788.487	2.89679	0.0338927	3	522	316.719	303.242	330.337	316.766	2.50074	0.0427687	13.5477	3	872	0.401739	-1.31567
REVERSE6709	3	1	10.1741	0.617799	0.209153	0.185682	1.06792	0.0708514	CF42	PF44	158281	Reversed Sequence 6709	149.346	177.59	134.808	153.915	2.18728	0.141337	3	1132	121.793	138.986	171.6	144.126	2.15874	0.17553	25.2985	3	1142	0.936404	-0.0947977
REVERSE67768	3	1	10.9472	0.347813	0.458655	0.120613	1.35327	0.131699	PF44	CF42	214111	Reversed Sequence 67768	21.9891	50.4286	84.8882	52.4353	1.71962	0.600693	3	1401	61.2569	86.4995	65.1207	70.959	1.85101	0.191609	13.5964	3	1328	1.35327	0.436449
REVERSE7187	4	1	14.9047	2.73799e-07	6.56257	1.06282e-05	3.54636	1	PF44	CF42	57224.9	Reversed Sequence 7187	1087.16	1125.14	1058.57	1090.29	3.03754	0.0306324	3	423	3834.88	3907.81	3856.99	3866.56	3.58732	0.009671	37.3935	3	137	3.54636	1.82634
REVERSE721	5	2	19.0542	0.0240649	1.61862	0.0173254	4.60136	0.753302	CF42	PF44	129793	Reversed Sequence 721	190.664	158.77	184.967	178.134	2.25075	0.0954882	3	1078	56.5677	47.2549	12.3175	38.7134	1.58786	0.602607	23.3289	3	1425	0.217327	-2.20206
REVERSE745	2	1	8.2159	0.0979626	1.00894	0.0473004	1.19391	0.377207	CF42	PF44	33823.1	Reversed Sequence 745	1099.87	1104.82	1179.83	1128.17	3.05238	0.0397187	3	411	801.115	1055.19	978.521	944.942	2.97541	0.137917	130.324	3	475	0.837587	-0.255689
REVERSE7648	23	3	80.4037	0.0440169	1.35638	0.0267969	1.71285	0.592327	PF44	CF42	451036	Reversed Sequence 7648	71.7641	117.158	82.8336	90.5852	1.95706	0.261287	3	1290	182.488	161.094	121.895	155.159	2.19078	0.19805	30.7293	3	1111	1.71285	0.776399
REVERSE7660	22	3	79.3347	0.930436	0.0313137	0.253474	1.30907	0.0506133	CF42	PF44	270027	Reversed Sequence 7660	145.756	124.134	25.2242	98.3714	1.99287	0.653271	3	1268	57.9432	65.8409	101.655	75.1462	1.87591	0.309984	23.2941	3	1311	0.763903	-0.388538
REVERSE8027	14	1	61.2122	0.000113047	3.94674	0.000550878	1.26438	1	PF44	CF42	304960	Reversed Sequence 8027	18111.7	17538.5	17559.2	17736.5	4.24887	0.0183313	3	27	22839.4	22481.6	21955.8	22425.6	4.35074	0.0198193	444.459	3	22	1.26438	0.338427
REVERSE8099	5	1	18.129	0.0607134	1.21672	0.0337406	8.36388	0.503182	PF44	CF42	188885	Reversed Sequence 8099		11.4633		11.4633	1.05931	#DIV/0!	1	1510	34.4651	50.109	11.3031	31.9591	1.50459	0.610904	19.5239	3	1447	2.78796	1.47921
REVERSE81820	1	1	3.2561	0.0103239	1.98616	0.00992514	1.27467	0.918556	PF44	CF42	134718	Reversed Sequence 81820	8259.39	9127.71	9612.56	8999.89	3.95424	0.0761769	3	57	11036	12148.9	11230.9	11471.9	4.05964	0.0518052	594.306	3	49	1.27467	0.350129
REVERSE8388	4	2	16.7674	0.0452009	1.34485	0.027107	10.9576	0.584947	PF44	CF42	89740.2	Reversed Sequence 8388	205.453	262.306	221.691	229.816	2.36138	0.127426	3	985	429.015	3707.57	3418.15	2518.24	3.4011	0.720781	1815.1	3	216	10.9576	3.45386
REVERSE8441	3	1	10.111	0.00144054	2.84147	0.00281546	9.57753	0.999812	CF42	PF44	119373	Reversed Sequence 8441	150.527	187.45	157.552	165.177	2.21795	0.1187	3	1106	8.94409	21.7689	21.0258	17.2463	1.2367	0.417452	7.19949	3	1486	0.104411	-3.25965
REVERSE8542	17	3	66.4295	0.717049	0.144451	0.207686	1.08341	0.060789	CF42	PF44	518035	Reversed Sequence 8542	81.937	49.6647	61.5796	64.3938	1.80884	0.253428	3	1357	60.0988	70.5501	47.6591	59.436	1.77405	0.19281	11.4599	3	1358	0.923009	-0.115583
REVERSE8545	20	3	70.1019	0.889472	0.0508675	0.244787	1.01687	0.0515574	CF42	PF44	491471	Reversed Sequence 8545	171.159	211.679	166.185	183.008	2.26247	0.136359	3	1069	167.831	171.237	200.846	179.971	2.2552	0.100894	18.1581	3	1069	0.983409	-0.0241363
REVERSE8549	17	1	61.2521	0.00358161	2.44592	0.00482424	1.18729	0.992902	CF42	PF44	511121	Reversed Sequence 8549	595.952	635.925	648.755	626.878	2.79718	0.0439316	3	604	516.407	533.397	534.172	527.992	2.72263	0.0190158	10.0402	3	691	0.842257	-0.247668
REVERSE8615	34	4	133.926	0.335873	0.473825	0.117418	1.00893	0.136443	PF44	CF42	464696	Reversed Sequence 8615	2751.97	2711.31	2676.11	2713.13	3.43347	0.0139923	3	195	2734.13	2744.87	2733.05	2737.35	3.43733	0.00238816	6.53725	3	196	1.00893	0.0128238
REVERSE8620	22	1	74.2175	0.00516122	2.28725	0.00622664	42.9245	0.980449	CF42	PF44	535146	Reversed Sequence 8620	153.36	108.976	90.0689	117.468	2.06992	0.276578	3	1219	3.02305	5.18683		4.10494	0.613307	0.372728	1.53002	2	1518	0.0349451	-4.83877
REVERSE8623	26	2	97.3264	0.0457498	1.33961	0.0272911	1.2702	0.58159	CF42	PF44	496101	Reversed Sequence 8623	168.736	147.546	147.065	154.449	2.18879	0.0801264	3	1128	105.791	124.029	134.962	121.594	2.08491	0.121203	14.7376	3	1197	0.787276	-0.345059
REVERSE8755	7	1	25.3219	0.00300682	2.52189	0.00440483	1.18693	0.995961	PF44	CF42	515927	Reversed Sequence 8755	8235.17	7794.59	8168.04	8065.93	3.90665	0.0294292	3	60	9527.04	9260.26	9933.73	9573.68	3.98108	0.0354254	339.152	3	59	1.18693	0.247233
REVERSE8902	2	1	7.7793	0.0256067	1.59165	0.0182193	1.23494	0.737805	PF44	CF42	91960.8	Reversed Sequence 8902	244.247	241.803	246.789	244.279	2.38789	0.0102071	3	963	270.372	332.207	302.432	301.67	2.47953	0.10251	30.9243	3	887	1.23494	0.30444
REVERSE8969	10	3	36.3258	0.044763	1.34908	0.0270395	1.08121	0.587655	CF42	PF44	337753	Reversed Sequence 8969	332.942	346.105	317.286	332.111	2.52128	0.0434425	3	854	309.884	310.237	301.381	307.167	2.48738	0.0163235	5.01403	3	884	0.924893	-0.112641
REVERSE914	3	1	10.1175	0.345927	0.461016	0.120249	1.5149	0.132429	PF44	CF42	116653	Reversed Sequence 914	8.64091	206.845	83.2353	99.5739	1.99815	1.00536	3	1265	191.929	149.383	111.221	150.845	2.17853	0.267652	40.3739	3	1122	1.5149	0.599224
REVERSE9326	3	1	10.4528	0.000956078	3.01951	0.00214468	1.29383	0.999982	PF44	CF42	54551	Reversed Sequence 9326	386.97	390.489	392.847	390.102	2.59118	0.00758069	3	775	533.824	484.807	495.552	504.727	2.70306	0.0510464	25.7645	3	709	1.29383	0.371653
REVERSE9547	4	1	13.9647	0.0533779	1.27264	0.0307347	26.2317	0.53872	CF42	PF44	66136.6	Reversed Sequence 9547	13.5394	200.021	193.534	135.698	2.13257	0.779983	3	1174	15.5192			15.5192	1.19087	#DIV/0!	#DIV/0!	1	1487	0.114365	-3.12828
REVERSE966	6	1	29.0227	0.022337	1.65097	0.0164171	2.00315	0.771418	CF42	PF44	173943	Reversed Sequence 966	115.854	130.978	197.889	148.24	2.17097	0.294502	3	1147	83.7117	61.3341	76.9652	74.0036	1.86925	0.155114	11.479	3	1317	0.499213	-1.00227
REVERSE9700	5	1	20.4269	0.00342549	2.46528	0.00477456	1.65841	0.99382	PF44	CF42	130629	Reversed Sequence 9700	94.0574	77.063	74.5993	81.9066	1.91332	0.129352	3	1314	125.551	141.207	140.747	135.835	2.13301	0.065591	8.90956	3	1160	1.65841	0.729804
REVERSE9939	3	2	11.6409	0.111464	0.952864	0.0521817	3.27996	0.345679	CF42	PF44	142270	Reversed Sequence 9939	96.5434	53.0428	95.6598	81.7487	1.91248	0.304151	3	1317	43.8261	3.88893	27.0559	24.9236	1.39661	0.80461	20.0538	3	1463	0.304881	-1.71368
REVERSE995	2	1	7.9328	0.0104097	1.98256	0.00996316	5.33503	0.917425	CF42	PF44	23716	Reversed Sequence 995	48.9922	46.0929	92.304	62.463	1.79562	0.414384	3	1365	14.2921	14.9309	5.9012	11.7081	1.06849	0.43039	5.03904	3	1501	0.18744	-2.4155
P52565;J3KTF8;J3QQX2;J3KRE2;J3KRY1;P52565-2;J3KS60	5	5	28.4658	0.807273	0.0929795	0.227843	1.00407	0.0548309	CF42	PF44	23264.2	Rho GDP-dissociation inhibitor 1 OS=Homo sapiens OX=9606 GN=ARHGDIA PE=1 SV=3	3831.86	3918.8	3770.02	3840.23	3.58436	0.0194637	3	143	3771.33	3796.51	3906.13	3824.66	3.58259	0.0187386	71.6687	3	139	0.995946	-0.00586111
Q07960;H0YE29;E9PNR6	5	4	29.3582	0.0164969	1.7826	0.0134822	1.13951	0.838757	PF44	CF42	50492.8	Rho GTPase-activating protein 1 OS=Homo sapiens OX=9606 GN=ARHGAP1 PE=1 SV=1	764.127	773.392	697.548	745.022	2.87217	0.055534	3	542	857.048	839.613	850.222	848.961	2.92889	0.0103484	8.78543	3	507	1.13951	0.188415
Q8N392;Q8N392-2	3	1	13.7236	0.759246	0.119618	0.216434	1.06588	0.0576681	PF44	CF42	75262	Rho GTPase-activating protein 18 OS=Homo sapiens OX=9606 GN=ARHGAP18 PE=1 SV=3	169.713	114.705	82.7804	122.399	2.08778	0.359268	3	1205	102.925	169.989	118.474	130.463	2.11549	0.269063	35.1027	3	1177	1.06588	0.0920419
Q9NRY4	3	1	6.8868	0.00427909	2.36865	0.00546879	1.84502	0.988067	PF44	CF42	172054	Rho GTPase-activating protein 35 OS=Homo sapiens OX=9606 GN=ARHGAP35 PE=1 SV=3	100.604	120.164	108.209	109.659	2.04004	0.0899187	3	1232	178.05	239.429	189.488	202.322	2.30604	0.161327	32.6401	3	1037	1.84502	0.883634
Q96QB1;Q96QB1-3;Q96QB1-5	3	1	11.1609	0.0926315	1.03324	0.0455433	8.56539	0.391249	PF44	CF42	172303	Rho GTPase-activating protein 7 OS=Homo sapiens OX=9606 GN=DLC1 PE=1 SV=4		69.2195	27.7354	48.4775	1.68554	0.605099	2	1414	263.847	298.207	268.403	276.819	2.4422	0.0674154	18.6619	3	920	5.71026	2.51356
O15013;H0YAN8;O15013-4;O15013-5;O15013-6;O15013-7	4	1	11.5584	0.281929	0.549861	0.102332	1.48773	0.161985	PF44	CF42	152809	Rho guanine nucleotide exchange factor 10 OS=Homo sapiens OX=9606 GN=ARHGEF10 PE=1 SV=4	40.6934	58.5728	81.6637	60.31	1.78039	0.340579	3	1369	121.168	93.5266	54.4802	89.7249	1.95291	0.37343	33.506	3	1273	1.48773	0.573112
Q13464;A0A0U1RQV4;D6REE7	12	1	47.9084	0.201616	0.695475	0.0800074	1.21558	0.219106	PF44	CF42	159201	Rho-associated protein kinase 1 OS=Homo sapiens OX=9606 GN=ROCK1 PE=1 SV=1	294.868	266.963	315.874	292.568	2.46623	0.0838667	3	906	293.24	343.669	430.012	355.641	2.55101	0.194487	69.1676	3	815	1.21558	0.281646
P08134;E9PQH6;Q5JR08	6	1	44.9565	0.895058	0.0481487	0.245853	1.00617	0.0514026	PF44	CF42	22348.6	Rho-related GTP-binding protein RhoC OS=Homo sapiens OX=9606 GN=RHOC PE=1 SV=1	1270.62	1280.77	1242.68	1264.69	3.10198	0.0155988	3	380	1293.66	1188.65	1335.16	1272.49	3.10466	0.059343	75.5135	3	376	1.00617	0.00887302
P13489;E9PIM9;E9PLZ3;E9PMJ3;H0YCR7;E9PIK5;E9PMA9;E9PMN0;E9PMI1;E9PR82	10	6	75.2114	0.0493967	1.3063	0.0290641	1.18229	0.560251	PF44	CF42	51798.4	Ribonuclease inhibitor OS=Homo sapiens OX=9606 GN=RNH1 PE=1 SV=2	976.793	828.132	834.496	879.807	2.94439	0.095535	3	486	1051.71	1084.09	984.752	1040.18	3.01711	0.0487057	50.6628	3	442	1.18229	0.24158
P23921;E9PL69	3	1	11.0905	0.00720872	2.14214	0.00794055	3.05744	0.958231	PF44	CF42	90982.8	Ribonucleoside-diphosphate reductase large subunit OS=Homo sapiens OX=9606 GN=RRM1 PE=1 SV=1	93.0929	58.2232	47.5005	66.2722	1.82133	0.3597	3	1352	171.629	246.808	189.431	202.623	2.30669	0.193893	39.2872	3	1036	3.05744	1.61232
J3KTE4;J3QR09;P84098	3	1	18.1448	0.0674105	1.17127	0.0363371	1.36458	0.474662	CF42	PF44	23361.8	Ribosomal protein L19 OS=Homo sapiens OX=9606 GN=RPL19 PE=1 SV=1	2842.76	2397.14	2463.21	2567.71	3.40955	0.0936588	3	207	1473.9	2003.53	2167.6	1881.68	3.27455	0.192675	362.553	3	286	0.732824	-0.44846
Q9P2E9;Q9P2E9-3;A0A087WVV2;F8W7S5;A0A087WU26;A2A2S5;Q8N4C6-11;Q8N4C6-6	36	27	231.976	0.393315	0.405259	0.130508	1.04115	0.115935	PF44	CF42	152856	Ribosome-binding protein 1 OS=Homo sapiens OX=9606 GN=RRBP1 PE=1 SV=5	2037.81	1793.79	1864.35	1898.65	3.27844	0.0661388	3	275	2060.08	1926.11	1944.13	1976.77	3.29596	0.0367792	72.7042	3	264	1.04115	0.0581744
A0A087X2B1;A0A0G2JRA5;A0A0G2JSB3;A0A286YEU2;A6NFN3;A6NFN3-2;B0QYV1;B0QYY4;B0QYY7;B7Z1U7;F8VR27;F8VZG9;F8VZY7;I3L1D4;J3KNW3;J3QQZ2;J3QRF4;O43251;O43251-10;O43251-2;O43251-4;O43251-5;O43251-6;O43251-7;O43251-8;O43251-9;Q9NWB1;Q9NWB1-2;Q9NWB1-3;Q9NWB1-4;Q9NWB1-5;S4R469	1	1	4.7591	0.161197	0.792643	0.0679987	1.91607	0.263165	CF42	PF44	40309.8	RNA binding protein fox-1 homolog OS=Homo sapiens OX=9606 GN=RBFOX1 PE=1 SV=1	54.4664	65.4108	54.5429	58.14	1.76448	0.108303	3	1379	35.0827	46.3949	9.5527	30.3434	1.48206	0.621973	18.8728	3	1450	0.521903	-0.938147
H3BT71;P38159;H0Y6E7;H3BR27;P38159-3;Q96E39;A0A1B0GUK8;H3BUY5;O75526;P38159-2;Q8N7X1	7	4	44.1915	0.131858	0.879892	0.0582469	1.13634	0.30664	CF42	PF44	32197.5	RNA-binding motif protein_ X chromosome OS=Homo sapiens OX=9606 GN=RBMX PE=1 SV=1	222.798	239.39	223.852	228.68	2.35923	0.0406247	3	989	180.407	197.196	226.124	201.242	2.30372	0.114913	23.1254	3	1040	0.880017	-0.184396
Q96PK6;Q96PK6-2	1	1	4.4024	0.020143	1.69588	0.0155754	2.79032	0.795603	PF44	CF42	69662.8	RNA-binding protein 14 OS=Homo sapiens OX=9606 GN=RBM14 PE=1 SV=2	33.6586	41.8099	74.6334	50.0339	1.69926	0.433507	3	1411	116.416	116.933	185.483	139.611	2.14492	0.28456	39.7276	3	1150	2.79032	1.48043
A0A087WWP4;Q96T37;Q96T37-2;Q96T37-3;Q96T37-4	4	1	20.4136	0.0976368	1.01039	0.047196	5.19609	0.378036	PF44	CF42	102306	RNA-binding protein 15 OS=Homo sapiens OX=9606 GN=RBM15 PE=1 SV=1	67.5127		6.07652	36.7946	1.56578	1.18066	2	1443	127.248	151.853	103.275	127.459	2.10537	0.190567	24.2894	3	1186	3.46406	1.79246
H3BPE7;P35637;P35637-2;A0A075B7D9;Q92804;Q92804-2	4	2	19.9697	0.00200481	2.69793	0.00359011	1.45339	0.999131	CF42	PF44	53725.1	RNA-binding protein FUS OS=Homo sapiens OX=9606 GN=FUS PE=1 SV=1	304.207	298.829	292.61	298.548	2.47501	0.0194381	3	895	216.719	214.586	184.941	205.415	2.31263	0.0864743	17.7631	3	1026	0.688047	-0.539422
Q5TZA2;Q5TZA2-2;B1AKD8;A0A087WW81	18	1	73.7055	0.018395	1.7353	0.0146716	57.9913	0.815834	CF42	PF44	228923	Rootletin OS=Homo sapiens OX=9606 GN=CROCC PE=1 SV=1	14.8837	142.031	132.054	96.3228	1.98373	0.734037	3	1273			4.98296	4.98296	0.697488	#DIV/0!	#DIV/0!	1	1516	0.0517319	-4.2728
H7C4G5;Q9Y265;E7ETR0;H7C4I3;Q9Y265-2	2	2	10.7889	0.146255	0.83489	0.0627402	2.01463	0.283765	PF44	CF42	30194.7	RuvB-like helicase (Fragment) OS=Homo sapiens OX=9606 GN=RUVBL1 PE=1 SV=1	35.1768	134.575	149.868	106.54	2.02751	0.584509	3	1239	168.023	231.641	244.253	214.639	2.33171	0.190368	40.8603	3	1014	2.01463	1.01052
P21817;P21817-2;P21817-3	8	2	27.4532	0.0335892	1.4738	0.0222297	1.79585	0.666671	PF44	CF42	570879	Ryanodine receptor 1 OS=Homo sapiens OX=9606 GN=RYR1 PE=1 SV=3	49.8837	41.1234	64.6649	51.8906	1.71509	0.229298	3	1402	95.5294	112.108	71.9271	93.188	1.96936	0.216683	20.1923	3	1266	1.79585	0.84467
Q92736;H7BY35;Q92736-2	27	1	101.229	0.0122681	1.91122	0.011054	2.45788	0.892892	CF42	PF44	569701	Ryanodine receptor 2 OS=Homo sapiens OX=9606 GN=RYR2 PE=1 SV=3	174.592	194.765	260.185	209.847	2.3219	0.213229	3	1019	95.4669	58.7716	101.894	85.3774	1.93134	0.272488	23.2643	3	1285	0.406855	-1.29741
Q9NZJ4;Q9NZJ4-2;H0Y6M8	24	3	85.9251	0.0155035	1.80957	0.0130085	1.55043	0.851129	PF44	CF42	526830	Sacsin OS=Homo sapiens OX=9606 GN=SACS PE=1 SV=2	395.1	484.82	356.332	412.084	2.61499	0.159934	3	756	606.586	590.965	719.167	638.906	2.80544	0.109477	69.9457	3	609	1.55043	0.632667
P31153;P31153-2	4	1	23.7664	0.000514865	3.28831	0.00143993	1.63702	1	CF42	PF44	44002.9	S-adenosylmethionine synthase isoform type-2 OS=Homo sapiens OX=9606 GN=MAT2A PE=1 SV=1	1624.95	1869.47	1732.4	1742.27	3.24112	0.070342	3	298	1120.12	1037.62	1035.14	1064.29	3.02706	0.0454409	48.3625	3	436	0.610865	-0.711074
P16615;P16615-2;P16615-3;P16615-5;H7C5W9;P16615-4;H3BTW4	12	3	72.7821	0.673776	0.171484	0.198269	1.09152	0.0646681	CF42	PF44	116411	Sarcoplasmic/endoplasmic reticulum calcium ATPase 2 OS=Homo sapiens OX=9606 GN=ATP2A2 PE=1 SV=1	246.943	180.799	298.066	241.936	2.3837	0.243014	3	967	235.203	223.063	206.687	221.651	2.34567	0.0645618	14.3102	3	1003	0.916157	-0.126333
Q12765;Q12765-2;Q12765-3;C9K052	2	1	12.266	0.0370733	1.43094	0.0235159	1.29203	0.639786	CF42	PF44	47009.4	Secernin-1 OS=Homo sapiens OX=9606 GN=SCRN1 PE=1 SV=2	694.339	708.556	710.994	704.629	2.84796	0.0127656	3	558	462.663	620.25	553.181	545.364	2.73669	0.145011	79.0837	3	669	0.773973	-0.369644
Q9NVA2;D6RER5;D6RGI3;Q9NVA2-2;D6RDU5;H0Y961;Q14141;B1AMS2;D6R9Y6;D6RDP1;H0Y9G8;Q14141-2;Q14141-4	5	2	25.0825	0.00313755	2.50341	0.00451429	1.3205	0.995343	PF44	CF42	49683.5	Septin-11 OS=Homo sapiens OX=9606 GN=SEPT11 PE=1 SV=3	1380.28	1275.71	1262.59	1306.2	3.11601	0.0493773	3	371	1841.03	1678.36	1655.12	1724.83	3.23675	0.0587276	101.295	3	304	1.3205	0.401085
Q15019;Q15019-2;Q15019-3;B5MCX3;C9J2Q4;C9J938;C9JB25;C9IY94;C9IZU3;B5MD47;C9JQJ4;C9JZI2;H7C310;A0A1B0GXJ2;C9JFT1;F8WB65;H7C2Y0;C9JSE7;C9JT15	7	4	48.0871	0.930456	0.0313044	0.253474	1.03849	0.050613	CF42	PF44	41715.7	Septin-2 OS=Homo sapiens OX=9606 GN=SEPT2 PE=1 SV=1	739.048	1212.81	1173.36	1041.74	3.01776	0.252348	3	437	1062.43	1020.97	926.008	1003.14	3.00136	0.0697192	69.9378	3	455	0.962941	-0.0544805
E7EPK1;E7ES33;Q16181;Q16181-2;G3V1Q4;A0A0U1RRD1;A0A0U1RRE1;A0A0U1RRM2	4	2	25.6779	0.0743326	1.12882	0.0390899	1.27183	0.448426	CF42	PF44	50980.2	Septin-7 OS=Homo sapiens OX=9606 GN=SEPT7 PE=1 SV=2	423.953	334.563	368.22	375.579	2.5747	0.120207	3	792	254.61	307.355	323.953	295.306	2.47027	0.122611	36.2078	3	898	0.786269	-0.346904
Q9UHD8;Q9UHD8-2;Q9UHD8-5;Q9UHD8-7;Q9UHD8-3;K7EIE4;K7EK18;K7EL40;K7EQD7;K7ER52;Q9UHD8-4;Q9UHD8-8;Q9UHD8-9;K7EIR4;K7EJV0;K7EJZ2;K7EKN4;K7ELJ9;K7EN52;K7ENL0;K7ENQ5;K7EPY1;K7ER14;K7EJ51;K7EJL9;K7ERG1	8	4	48.8482	0.937086	0.0282203	0.254797	1.0155	0.0505013	CF42	PF44	65686.7	Septin-9 OS=Homo sapiens OX=9606 GN=SEPT9 PE=1 SV=2	891.069	678.874	676.643	748.862	2.8744	0.164463	3	541	712.949	794.686	704.659	737.431	2.86772	0.0674728	49.7566	3	555	0.984736	-0.0221913
Q13501;E7EMC7;Q13501-2;E3W990;C9J6J8;D6RBF1;E9PFW8;C9JRJ8	6	5	40.0946	0.00328174	2.4839	0.00465094	1.37267	0.994608	PF44	CF42	48485.6	Sequestosome-1 OS=Homo sapiens OX=9606 GN=SQSTM1 PE=1 SV=1	689.723	689.481	594.281	657.828	2.81811	0.0836599	3	586	921.423	887.145	900.371	902.98	2.95568	0.0191444	17.287	3	486	1.37267	0.456983
P34897;P34897-3;P34897-2;G3V2Y4;G3V5L0;H0YIZ0;G3V241;G3V2E4;G3V2W0;G3V3Y8;G3V4T0;G3V4W5;G3V4X0;G3V540	6	3	31.0685	0.171801	0.764974	0.0716253	1.10296	0.250142	CF42	PF44	56449.3	Serine hydroxymethyltransferase_ mitochondrial OS=Homo sapiens OX=9606 GN=SHMT2 PE=1 SV=3	353.641	385.697	349.445	362.928	2.55982	0.0546402	3	809	360.126	325.278	301.743	329.049	2.51726	0.0892683	29.3736	3	852	0.906652	-0.141379
Q9UQ35;Q9UQ35-2;I3L3Q8	13	1	55.2285	0.790714	0.101981	0.223756	1.0594	0.0557276	CF42	PF44	300357	Serine/arginine repetitive matrix protein 2 OS=Homo sapiens OX=9606 GN=SRRM2 PE=1 SV=2	358.373	260.442	225.414	281.41	2.44934	0.244891	3	916	230.115	260.396	306.386	265.632	2.42428	0.144576	38.404	3	934	0.943934	-0.0832415
P84103;A0A087X2D0;P84103-2	4	3	12.396	0.00014154	3.84912	0.000586159	2.52904	1	PF44	CF42	19557.7	Serine/arginine-rich splicing factor 3 OS=Homo sapiens OX=9606 GN=SRSF3 PE=1 SV=1	154.923	138.759	127.362	140.348	2.14721	0.0986766	3	1167	359.763	371.851	333.22	354.945	2.55016	0.0556743	19.7613	3	817	2.52904	1.33859
J3KSR8;J3KTL2;Q07955;Q07955-2;Q07955-3	4	2	20.6827	0.152333	0.817207	0.064831	1.54102	0.275038	CF42	PF44	16397.1	Serine/arginine-rich-splicing factor 1 (Fragment) OS=Homo sapiens OX=9606 GN=SRSF1 PE=1 SV=1	163.823	114.35	121.49	133.221	2.12457	0.200726	3	1182	128.539	76.4361	54.3755	86.45	1.93677	0.44051	38.0821	3	1282	0.648922	-0.623884
J3KP15;J3QL05;Q01130;Q01130-2	1	1	5.9566	0.00191051	2.71885	0.00347193	1.84306	0.999293	PF44	CF42	15371.2	Serine/arginine-rich-splicing factor 2 (Fragment) OS=Homo sapiens OX=9606 GN=SRSF2 PE=1 SV=8	233.262	312.922	270.283	272.156	2.43482	0.146472	3	925	504.982	493.636	506.182	501.6	2.70036	0.0138019	6.92305	3	711	1.84306	0.882107
C9J232;C9J6L2;C9JCC0;H7C279;O00506;O00506-2;O00506-3;B4DR80;C9JDH9;H0Y630;Q9Y6E0;Q9Y6E0-2	2	1	10.489	0.497061	0.30359	0.156725	1.06013	0.0899836	CF42	PF44	19912.1	Serine/threonine-protein kinase 25 (Fragment) OS=Homo sapiens OX=9606 GN=STK25 PE=1 SV=1		100.578	131.004	115.791	2.06368	0.185806	2	1222	67.6374	80.9655	69.8443	72.8157	1.86223	0.0981057	7.14364	3	1320	0.628854	-0.669203
Q13535;Q13535-2;Q13535-3;D6RIG7	8	1	31.2378	0.000850929	3.07011	0.00198103	1.14417	0.999991	PF44	CF42	304960	Serine/threonine-protein kinase ATR OS=Homo sapiens OX=9606 GN=ATR PE=1 SV=3	220720	214343	215485	216849	5.33616	0.0156813	3	2	253671	247193	243476	248113	5.39465	0.0207927	5158.96	3	2	1.14417	0.194307
O15075;O15075-2;O15075-3;O15075-4	2	1	6.0425	0.0546401	1.26249	0.0311286	6.1935	0.532243	PF44	CF42	82794.4	Serine/threonine-protein kinase DCLK1 OS=Homo sapiens OX=9606 GN=DCLK1 PE=1 SV=2	20.4294	13.6257	2.36713	12.1408	1.08425	0.751374	3	1506	31.4225	87.9451	106.214	75.1939	1.87618	0.518555	38.9922	3	1310	6.1935	2.63076
Q9Y5S2;A6NJ78	9	1	37.4129	0.532731	0.273492	0.164712	1.05331	0.0833478	PF44	CF42	196312	Serine/threonine-protein kinase MRCK beta OS=Homo sapiens OX=9606 GN=CDC42BPB PE=1 SV=2	888.162	889.312	808.9	862.125	2.93557	0.0534695	3	497	881.214	821.513	1021.52	908.082	2.95812	0.113066	102.673	3	484	1.05331	0.0749252
Q6DT37	3	1	12.273	0.488684	0.310972	0.154988	1.01949	0.0916853	PF44	CF42	173885	Serine/threonine-protein kinase MRCK gamma OS=Homo sapiens OX=9606 GN=CDC42BPG PE=1 SV=2	176.749	186.287	188.896	183.977	2.26476	0.034756	3	1063	182.43	187.703	192.555	187.563	2.27315	0.0269971	5.06365	3	1062	1.01949	0.0278434
P42345;B1AKP8;B1AKQ2	10	1	42.3974	0.0914248	1.03894	0.0453014	1.76683	0.394571	PF44	CF42	290945	Serine/threonine-protein kinase mTOR OS=Homo sapiens OX=9606 GN=MTOR PE=1 SV=1	43.3349	47.4415	78.3715	56.3826	1.75115	0.339702	3	1389	112.812	67.1285	118.914	99.6183	1.99834	0.284103	28.3019	3	1252	1.76683	0.82116
H7C1X3;Q13177;A0A087X294;B3KNX7;E9PM17;H0YCG5;O75914;O75914-2;O75914-3;O75914-4;Q13153;Q13153-2	3	1	15.9219	0.0379175	1.42116	0.0239456	1.30355	0.633602	CF42	PF44	24598.6	Serine/threonine-protein kinase PAK 2 (Fragment) OS=Homo sapiens OX=9606 GN=PAK2 PE=1 SV=1	451.631	496.629	491.144	479.801	2.68106	0.0511673	3	716	428.744	323.137	352.333	368.071	2.56593	0.148161	54.5339	3	804	0.767133	-0.382451
Q52WX2	2	2	7.9212	0.887066	0.0520443	0.24428	1.00522	0.0516267	CF42	PF44	46822	Serine/threonine-protein kinase SBK1 OS=Homo sapiens OX=9606 GN=SBK1 PE=2 SV=1	1773.24	1724.43	1880.78	1792.82	3.25354	0.0446175	3	289	1811.35	1711.3	1827.87	1783.51	3.25127	0.0353682	63.0794	3	296	0.994807	-0.00751072
O75385	6	1	20.5799	0.182589	0.738527	0.0743992	1.30838	0.238048	PF44	CF42	113658	Serine/threonine-protein kinase ULK1 OS=Homo sapiens OX=9606 GN=ULK1 PE=1 SV=2	161.812	148.02	236.208	182.013	2.2601	0.260629	3	1070	194.962	247.56	271.906	238.143	2.37684	0.165141	39.327	3	974	1.30838	0.387785
P30153;B3KQV6;C9J9C1;E9PH38	12	4	75.6838	0.0766025	1.11576	0.0398452	1.18877	0.440446	CF42	PF44	66107.1	Serine/threonine-protein phosphatase 2A 65 kDa regulatory subunit A alpha isoform OS=Homo sapiens OX=9606 GN=PPP2R1A PE=1 SV=4	924.95	814.179	788.244	842.458	2.92555	0.0861854	3	502	676.493	787.297	662.244	708.678	2.85045	0.0965996	68.458	3	572	0.841203	-0.249474
[truncated: 257 more rows]

## Sheet: TOTAL PROTEINS
TOTAL OF PROTEINS DETECTED							3971
[truncated: 3,976 more rows]

[truncated: 5 more sheets: ONLY ID BUT NOT QUANTIFIED, UNIQUE PROTEINS, QUANTIFIED PROTEINS, WITHOUT REVERSE, FILTERED PROTEINS]
