# Supplementary material for: The Proteome Profile of Olfactory Ecto-Mesenchymal Stem Cells-Derived from Patients with Familial Alzheimer’s Disease Reveals New Insights for AD Study
Source: Int J Mol Sci. 2023 Aug 9;24(16):12606. doi: 10.3390/ijms241612606 (PMC10454072; doi:10.3390/ijms241612606)
Supplement: Supplementary file 1 [file ijms-24-12606-s001.zip › Table S5. Diferentially expressed proteins (P2-C2).xlsx]

## Sheet: FILTERED PROTEINS
	PRESYMPTOMATIC CARRIER (P2) VS CONTROL (C2)
FILTERED PROTEINS
-UP-regulated proteins in PRE-symptomatic carrier vs control (FC>1.5)							75
-UNCHANGED proteins							322
-DOWN-regulated proteins in PRE-symptomatic carrier vs control (FC<0,6)							120
Accession	Peptide count	Unique peptides	Confidence score	Anova (p)	-LOG10.Anova(p)	q Value	Max fold change	Power	Highest mean condition	Lowest mean condition	Mass	GN	Description	CONTROL								PSEN1 (A431E) PRE-SYMPTOMATIC CARRIER								ratio.PF44/CF42 (Carrier/control)	LOG2 ratio.PF44/CF42 (Carrier/control)	EXPRESSION TAG (FC 1.5)
														20190314_UDMSE_CF42_001	20190314_UDMSE_CF42_002	20190314_UDMSE_CF42_003	average.intensity.control-CF42	log10(Average.intensity. control-CF42)	CV (Inten.Control-CF42)	count.control-CF42	IDs_control-CF42	20190314_UDMSE_PF44_001	20190314_UDMSE_PF44_002	20190314_UDMSE_PF44_003	average.intensity.carrier-PF44	log10(Average.intensity. carrier-PF44)	CV (Inten.Carrier-PF44)	count.Carrier-PF44	IDs_carrier-PF44
Q9Y6U3;Q9Y6U3-3;Q9Y6U3-2;E5RHX6;E5RHN8	10	3	66.8086	0.000109882	3.95907	0.0005503	14.9324	1	CF42	PF44	80945.2	SCIN	Adseverin OS=Homo sapiens OX=9606 GN=SCIN PE=1 SV=4	406.289	402.689	355.937	388.305	2.58917	0.0723376	3	779	17.995	27.7746	32.2432	26.0043	1.41504	0.280231	3	1458	0.0669687	-3.90037	DOWN
C9J1V9;D6RBD7;O43324;O43324-2;D6RCQ0;H0YAL7	3	2	17.3072	0.000338962	3.46985	0.00109713	9.67142	1	CF42	PF44	17017.6	EEF1E1-BLOC1S5	EEF1E1-BLOC1S5 readthrough (NMD candidate) OS=Homo sapiens OX=9606 GN=EEF1E1-BLOC1S5 PE=4 SV=2	117.539	143.86	119.238	126.879	2.10339	0.116099	3	1195	17.5589	12.7594	9.03837	13.1189	1.1179	0.325609	3	1496	0.103397	-3.27373	DOWN
Q7Z2Z1;Q7Z2Z1-2	11	2	40.3499	8.5752e-05	4.06676	0.00048596	8.70217	1	CF42	PF44	212853	TICRR	Treslin OS=Homo sapiens OX=9606 GN=TICRR PE=1 SV=2	341.026	336.396	377.32	351.581	2.54603	0.0637427	3	824	40.5026	31.4458	49.2563	40.4015	1.6064	0.220429	3	1419	0.114914	-3.12137	DOWN
P35580;P35580-2;P35580-3;P35580-4;P35580-5;E7ERA5	32	2	261.78	0.000128165	3.89223	0.000563925	7.7775	1	CF42	PF44	229969	MYH10	Myosin-10 OS=Homo sapiens OX=9606 GN=MYH10 PE=1 SV=3	212.779	228.403	173.752	204.978	2.31171	0.137324	3	1026	28.654	29.7048	20.707	26.3553	1.42087	0.186669	3	1457	0.128576	-2.95931	DOWN
Q16620;Q16620-4;Q16620-2;Q16620-3;Q16620-5;Q16620-6;Q16620-7	3	1	13.0415	0.000313806	3.50334	0.00104771	7.56287	1	CF42	PF44	93253.7	NTRK2	BDNF/NT-3 growth factors receptor OS=Homo sapiens OX=9606 GN=NTRK2 PE=1 SV=1	172.976	171.764	179.525	174.755	2.24243	0.0238925	3	1084	16.2316	29.794	23.2953	23.107	1.36374	0.293555	3	1470	0.132225	-2.91893	DOWN
P32455	4	1	18.0188	0.000128315	3.89172	0.000563925	5.56146	1	CF42	PF44	68444.1	GBP1	Guanylate-binding protein 1 OS=Homo sapiens OX=9606 GN=GBP1 PE=1 SV=2	188.739	193.925	151.108	177.924	2.25023	0.131336	3	1079	33.7329	35.504	26.7401	31.9923	1.50505	0.144847	3	1446	0.179809	-2.47546	DOWN
Q9NZR2;H0Y7T7	13	3	48.0642	8.12712e-05	4.09006	0.000473015	5.51401	1	CF42	PF44	535173	LRP1B	Low-density lipoprotein receptor-related protein 1B OS=Homo sapiens OX=9606 GN=LRP1B PE=1 SV=2	401.752	383.255	354.77	379.926	2.5797	0.0622953	3	787	83.0301	61.5292	62.1462	68.9018	1.83823	0.177634	3	1335	0.181356	-2.4631	DOWN
O75131;A0A087WYQ3;H0YB26;A0A087WXR6;E5RHZ0;A0A087WUS8;E5RFT7	6	2	36.7608	0.000232202	3.63413	0.000840405	5.16534	1	CF42	PF44	60986.1	CPNE3	Copine-3 OS=Homo sapiens OX=9606 GN=CPNE3 PE=1 SV=1	435.334	404.3	381.357	406.997	2.60959	0.0665591	3	761	68.0797	99.7869	68.5152	78.7939	1.89649	0.230751	3	1301	0.193598	-2.36886	DOWN
C9JD73;C9J177;C9JRC4;H7C118;Q15435;Q15435-2;Q15435-3;Q15435-4;Q15435-5	2	1	9.0868	0.000113377	3.94548	0.000550878	4.95596	1	CF42	PF44	32505	PPP1R7	Protein phosphatase 1 regulatory subunit 7 (Fragment) OS=Homo sapiens OX=9606 GN=PPP1R7 PE=1 SV=1	721.596	587.013	697.217	668.609	2.82517	0.107249	3	578	155.952	132.654	116.124	134.91	2.13004	0.148318	3	1161	0.201777	-2.30916	DOWN
A0A087X0Y2;A0A087X248;A0A087X2I9;A0A096LPD8;F5GWV3;F5H3N7;F5H8B4;O14607;O14607-2;O14607-3;O14607-4;A6NCS7;O14607-5	5	1	17.9535	0.00214657	2.66826	0.00368333	4.13913	0.998846	CF42	PF44	157378	UTY	Histone demethylase UTY OS=Homo sapiens OX=9606 GN=UTY PE=1 SV=1	737.41	585.58	661.245	661.412	2.82047	0.114777	3	583	104.616	180.747	194.022	159.795	2.20356	0.301921	3	1101	0.241597	-2.04933	DOWN
Q8IWI9;Q8IWI9-3;Q8IWI9-4;H3BP52;H3BTF4	8	1	35.1008	0.0028887	2.5393	0.00429017	3.9967	0.996478	CF42	PF44	334004	MGA	MAX gene-associated protein OS=Homo sapiens OX=9606 GN=MGA PE=1 SV=3	142.408	231.407	218.152	197.322	2.29518	0.243343	3	1037	61.2254	36.7735	50.1151	49.3713	1.69347	0.247976	3	1391	0.250206	-1.99881	DOWN
P17301;E7ESP4;E7EMF1;E9PB77;D6RG08	15	11	95.4099	9.63475e-09	8.01616	5.92805e-07	3.79202	1	CF42	PF44	130550	ITGA2	Integrin alpha-2 OS=Homo sapiens OX=9606 GN=ITGA2 PE=1 SV=1	1132.07	1131.23	1109.93	1124.41	3.05092	0.0111615	3	414	299.605	295.78	294.175	296.52	2.47205	0.00940833	3	897	0.263712	-1.92297	DOWN
P49721;A0A087WVV1	2	1	10.8571	0.000228177	3.64173	0.000832836	3.56555	1	CF42	PF44	23007.4	PSMB2	Proteasome subunit beta type-2 OS=Homo sapiens OX=9606 GN=PSMB2 PE=1 SV=1	257.185	277.886	272.877	269.316	2.43026	0.0401031	3	929	90.0291	72.3439	64.2255	75.5328	1.87814	0.17468	3	1308	0.280462	-1.83412	DOWN
Q7Z3U7;A0A286YFF8;Q7Z3U7-2;Q7Z3U7-5;Q7Z3U7-6;Q7Z3U7-3	5	2	16.4935	0.00748499	2.12581	0.00805294	3.49784	0.954903	CF42	PF44	192469	MON2	Protein MON2 homolog OS=Homo sapiens OX=9606 GN=MON2 PE=1 SV=3	200.73	144.094	108.985	151.27	2.17975	0.30602	3	1140	30.3567	43.4142	55.9689	43.2466	1.63595	0.296137	3	1411	0.28589	-1.80647	DOWN
E7EPN9;Q9Y520;Q9Y520-4;Q9Y520-5;Q9Y520-6;Q9Y520-7;Q9Y520-2;Q9Y520-3;A0A2R8YET2;H7C5N8;A0A0A0MS30;A0A2R8Y7F4	9	1	39.2862	0.00219777	2.65802	0.00375623	3.30088	0.998731	CF42	PF44	309347	PRRC2C	Protein PRRC2C OS=Homo sapiens OX=9606 GN=PRRC2C PE=1 SV=1	123.684	132.324	88.3365	114.781	2.05987	0.203044	3	1223	40.69	27.5047	36.1239	34.7729	1.54124	0.192555	3	1437	0.302949	-1.72285	DOWN
A0A075B730;P58107	11	1	47.6047	7.62982e-05	4.11749	0.000450202	3.2403	1	CF42	PF44	555584	EPPK1	Epiplakin OS=Homo sapiens OX=9606 GN=EPPK1 PE=1 SV=2	855.702	791.408	710.331	785.814	2.89532	0.0927025	3	525	263.634	225.783	238.121	242.513	2.38473	0.0795997	3	967	0.308614	-1.69613	DOWN
Q6ZRS2;A0A0A0MS59;A0A0C4DFX4;Q6ZRS2-2;Q6ZRS2-3	15	3	65.6915	0.00238005	2.62341	0.00395781	3.07892	0.998263	CF42	PF44	345209	SRCAP	Helicase SRCAP OS=Homo sapiens OX=9606 GN=SRCAP PE=1 SV=3	633.777	782.806	960.409	792.331	2.89891	0.206383	3	520	215.347	242.293	314.38	257.34	2.41051	0.198969	3	946	0.324789	-1.62243	DOWN
Q86YS3;Q86YS3-2;J3QKR9;K7EL58	7	1	28.6919	0.00278327	2.55545	0.00423583	3.04543	0.996907	CF42	PF44	72612.6	RAB11FIP4	Rab11 family-interacting protein 4 OS=Homo sapiens OX=9606 GN=RAB11FIP4 PE=1 SV=1	115.479	123.841	103.138	114.153	2.05749	0.0912396	3	1225	39.379	26.638	46.4325	37.4832	1.57384	0.267654	3	1428	0.32836	-1.60665	DOWN
P04844;P04844-2;Q5JYR4;Q5JYR7;F2Z3K5;H0Y5M1	6	5	39.1248	0.000133825	3.87346	0.000568331	2.92569	1	CF42	PF44	69398.1	RPN2	Dolichyl-diphosphooligosaccharide--protein glycosyltransferase subunit 2 OS=Homo sapiens OX=9606 GN=RPN2 PE=1 SV=3	835.773	1033.46	915.45	928.228	2.96765	0.107152	3	464	334.509	325.372	291.923	317.268	2.50143	0.0706649	3	870	0.341799	-1.54878	DOWN
Q9Y252;Q9Y252-2;Q9Y252-3	5	1	26.3077	3.07586e-05	4.51203	0.000232413	2.89596	1	CF42	PF44	78490.5	RNF6	E3 ubiquitin-protein ligase RNF6 OS=Homo sapiens OX=9606 GN=RNF6 PE=1 SV=1	262.248	227.124	232.018	240.463	2.38105	0.079113	3	970	79.169	85.4371	84.4966	83.0342	1.91926	0.0407091	3	1291	0.345309	-1.53404	DOWN
C9JZR2;O60716;O60716-10;O60716-11;O60716-13;O60716-17;O60716-18;O60716-19;O60716-2;O60716-21;O60716-25;O60716-26;O60716-27;O60716-29;O60716-3;O60716-5;O60716-9;O60716-12;O60716-14;O60716-15;O60716-16;O60716-20;O60716-22;O60716-23;O60716-24;O60716-28;O60716-30;O60716-31;O60716-32;O60716-4;O60716-6;O60716-7;O60716-8;E9PKY0	3	1	13.0986	0.00282262	2.54935	0.00425066	2.83469	0.996751	CF42	PF44	105419	CTNND1	Catenin delta-1 OS=Homo sapiens OX=9606 GN=CTNND1 PE=1 SV=2	272.011	387.802	356.575	338.796	2.52994	0.176827	3	846	135.171	93.1336	130.249	119.518	2.07743	0.192286	3	1202	0.352772	-1.50319	DOWN
P15559;B4DLR8;P15559-2;P15559-3;H3BRK3;H3BNV2	9	6	69.9595	4.97652e-06	5.30307	8.57344e-05	2.82279	1	CF42	PF44	30924.7	NQO1	NAD(P)H dehydrogenase [quinone] 1 OS=Homo sapiens OX=9606 GN=NQO1 PE=1 SV=1	892.723	871.947	921.125	895.265	2.95195	0.0275751	3	479	304.855	312.754	333.859	317.156	2.50127	0.0472779	3	871	0.354259	-1.49712	DOWN
C9IZZ0	8	1	66.1341	0.000174485	3.75824	0.000704544	2.80383	1	CF42	PF44	13246.2	RAB7A	Ras-related protein Rab-7a (Fragment) OS=Homo sapiens OX=9606 GN=RAB7A PE=1 SV=1	95.0582	94.8215	77.4957	89.1251	1.95	0.113011	3	1293	29.7716	32.0199	33.5691	31.7869	1.50225	0.0600704	3	1448	0.356655	-1.4874	DOWN
Q14195-2;Q14195;H0YBT4;D6RF19	8	5	52.9669	3.30995e-05	4.48018	0.000241623	2.77668	1	CF42	PF44	74367.6	DPYSL3	Isoform LCRMP-4 of Dihydropyrimidinase-related protein 3 OS=Homo sapiens OX=9606 GN=DPYSL3	397.711	435.532	374.344	402.529	2.6048	0.0767074	3	763	144.996	150.712	139.196	144.968	2.16127	0.0397198	3	1139	0.360142	-1.47336	DOWN
A0A1B0GTU4;F5GZ78;P49023;P49023-2;P49023-3;A0A1B0GU60;A0A1B0GV30;P49023-4;F5H836	5	2	26.742	0.00377166	2.42347	0.0049507	2.77329	0.991701	CF42	PF44	117845	PXN	Paxillin OS=Homo sapiens OX=9606 GN=PXN PE=1 SV=1	293.092	437.721	400.735	377.183	2.57655	0.199203	3	791	106.659	145.794	155.565	136.006	2.13356	0.19029	3	1159	0.360583	-1.4716	DOWN
P48735;P48735-2;H0YL11	5	2	25.5181	0.00143211	2.84402	0.00281546	2.7481	0.999818	CF42	PF44	51365.6	IDH2	Isocitrate dehydrogenase [NADP]_ mitochondrial OS=Homo sapiens OX=9606 GN=IDH2 PE=1 SV=2	256.233	184.688	256.388	232.437	2.3663	0.177903	3	981	96.2271	78.1243	79.3913	84.5809	1.92727	0.11948	3	1286	0.363888	-1.45843	DOWN
H0Y6I0;Q13439;Q13439-3;Q13439-4;Q13439-5;A0A087WTW2;E7EVX2	23	2	92.8219	0.00231441	2.63556	0.0039038	2.74418	0.998442	CF42	PF44	247520	GOLGA4	Golgin subfamily A member 4 (Fragment) OS=Homo sapiens OX=9606 GN=GOLGA4 PE=1 SV=1	168.964	163.579	202.75	178.431	2.25147	0.118994	3	1077	49.1569	74.5802	71.328	65.0217	1.81306	0.212778	3	1347	0.364408	-1.45638	DOWN
Q14573	18	1	61.6638	0.000654731	3.18394	0.00171945	2.65546	0.999999	CF42	PF44	307016	ITPR3	Inositol 1_4_5-trisphosphate receptor type 3 OS=Homo sapiens OX=9606 GN=ITPR3 PE=1 SV=2	813.098	857.246	783.916	818.087	2.9128	0.0451284	3	510	365.732	259.865	298.634	308.077	2.48866	0.173857	3	881	0.376582	-1.40896	DOWN
Q92736;H7BY35;Q92736-2	27	1	101.229	0.0122681	1.91122	0.011054	2.45788	0.892892	CF42	PF44	569701	RYR2	Ryanodine receptor 2 OS=Homo sapiens OX=9606 GN=RYR2 PE=1 SV=3	174.592	194.765	260.185	209.847	2.3219	0.213229	3	1019	95.4669	58.7716	101.894	85.3774	1.93134	0.272488	3	1285	0.406855	-1.29741	DOWN
Q8NFC6	7	1	28.2707	0.00794305	2.10001	0.00832367	2.42043	0.94927	CF42	PF44	332634	BOD1L1	Biorientation of chromosomes in cell division protein 1-like 1 OS=Homo sapiens OX=9606 GN=BOD1L1 PE=1 SV=2	165.181	179.304	163.781	169.422	2.22897	0.050681	3	1091	54.4383	58.0295	97.522	69.9966	1.84508	0.34152	3	1332	0.41315	-1.27526	DOWN
Q96QK1	5	1	24.5543	0.00503576	2.29793	0.0061377	2.3889	0.981622	CF42	PF44	92505.6	VPS35	Vacuolar protein sorting-associated protein 35 OS=Homo sapiens OX=9606 GN=VPS35 PE=1 SV=2	591.967	479.447	493.909	521.774	2.71748	0.117326	3	680	166.66	213.659	274.929	218.416	2.33928	0.248567	3	1007	0.418603	-1.25635	DOWN
H3BR35;P15170;P15170-2;P15170-3;Q8IYD1	2	1	7.7135	0.00170586	2.76806	0.00321156	2.27754	0.999574	CF42	PF44	53345.7	GSPT1	Eukaryotic peptide chain release factor GTP-binding subunit ERF3A (Fragment) OS=Homo sapiens OX=9606 GN=GSPT1 PE=1 SV=1	109.609	85.6909	77.3918	90.8971	1.95855	0.184026	3	1288	38.0734	42.5797	39.0776	39.9102	1.60108	0.0592764	3	1421	0.439071	-1.18747	DOWN
A0A286YF22;A0A2C9F2M7;O43175;A0A286YER3;A0A286YFA2;A0A286YFB2;A0A286YFC8;A0A286YFL2;A0A286YFM8;A0A286YF34;A0A286YFF3;A0A286YFK5	4	4	23.8235	0.000134596	3.87097	0.000568331	2.2514	1	CF42	PF44	56680.1	PHGDH	D-3-phosphoglycerate dehydrogenase OS=Homo sapiens OX=9606 GN=PHGDH PE=1 SV=1	422.146	375.603	364.98	387.577	2.58836	0.0784512	3	780	177.148	178.749	160.55	172.149	2.23591	0.0585351	3	1087	0.444168	-1.17082	DOWN
P13674;P13674-2;P13674-3	10	3	55.3031	0.000223543	3.65064	0.000822894	2.19844	1	CF42	PF44	61334.5	P4HA1	Prolyl 4-hydroxylase subunit alpha-1 OS=Homo sapiens OX=9606 GN=P4HA1 PE=1 SV=2	926.178	838.298	785.187	849.888	2.92936	0.0837837	3	501	413.673	385.19	360.895	386.586	2.58725	0.0683332	3	792	0.454868	-1.13648	DOWN
Q5RHP9	4	1	12.4482	0.0107336	1.96925	0.0101028	2.19352	0.913151	CF42	PF44	169151	ERICH3	Glutamate-rich protein 3 OS=Homo sapiens OX=9606 GN=ERICH3 PE=2 SV=1	84.9529	87.0551	86.7213	86.2431	1.93572	0.0130992	3	1303	52.138	27.8299	37.9838	39.3172	1.59458	0.31052	3	1422	0.455888	-1.13325	DOWN
Q13395	3	1	10.9645	0.00871833	2.05957	0.00875109	2.18663	0.939474	CF42	PF44	183956	TARBP1	Probable methyltransferase TARBP1 OS=Homo sapiens OX=9606 GN=TARBP1 PE=1 SV=1	227.53	229.821	226.408	227.92	2.35778	0.00763214	3	990	72.3913	120.285	120.024	104.233	2.01801	0.264564	3	1240	0.457325	-1.12871	DOWN
O75874;C9J4N6;C9JLU6;C9JJE5	4	2	24.2905	0.00507135	2.29488	0.00615269	2.17962	0.981292	CF42	PF44	46944.5	IDH1	Isocitrate dehydrogenase [NADP] cytoplasmic OS=Homo sapiens OX=9606 GN=IDH1 PE=1 SV=2	527.856	648.544	608.113	594.838	2.7744	0.103271	3	627	208.123	298.985	311.619	272.909	2.43602	0.206884	3	926	0.458796	-1.12408	DOWN
Q13724;Q13724-2;C9J8D4	3	1	12.2186	0.0371837	1.42965	0.0235512	2.15785	0.63897	CF42	PF44	92088.8	MOGS	Mannosyl-oligosaccharide glucosidase OS=Homo sapiens OX=9606 GN=MOGS PE=1 SV=5	385.046	238.978	319.979	314.668	2.49785	0.232558	3	868	90.9475	185.947	160.579	145.824	2.16383	0.337312	3	1136	0.463424	-1.1096	DOWN
P63010;P63010-2;P63010-3;A0A087WU93;A0A087WZQ6;A0A087X253;K7EN71;K7ERB2;A0A087WYD1	8	2	42.9248	0.00908601	2.04163	0.00902435	2.11196	0.934742	CF42	PF44	105465	AP2B1	AP-2 complex subunit beta OS=Homo sapiens OX=9606 GN=AP2B1 PE=1 SV=1	159.961	120.956	174.933	151.95	2.1817	0.18339	3	1139	61.5173	65.6548	88.67	71.9474	1.85701	0.203332	3	1324	0.473494	-1.07858	DOWN
A0A0A0MR67;A0A0A0MSA1;E9PDI6;F5GY28;F5H522;Q13936;Q13936-10;Q13936-11;Q13936-12;Q13936-13;Q13936-14;Q13936-15;Q13936-16;Q13936-17;Q13936-18;Q13936-19;Q13936-2;Q13936-20;Q13936-21;Q13936-22;Q13936-23;Q13936-24;Q13936-25;Q13936-26;Q13936-27;Q13936-28;Q13936-29;Q13936-3;Q13936-30;Q13936-31;Q13936-32;Q13936-33;Q13936-34;Q13936-35;Q13936-36;Q13936-37;Q13936-4;Q13936-5;Q13936-6;Q13936-7;Q13936-8;Q13936…	3	1	12.6887	0.00727291	2.13829	0.00797049	2.09734	0.957463	CF42	PF44	245968	CACNA1C	Voltage-dependent L-type calcium channel subunit alpha OS=Homo sapiens OX=9606 GN=CACNA1C PE=1 SV=1	293.663	204.405	311.857	269.975	2.43132	0.213017	3	928	114.299	133.967	137.902	128.723	2.10966	0.0982368	3	1182	0.476795	-1.06856	DOWN
Q9UQ80;Q9UQ80-2;F8VR77;F8W0A3;H0YIN7	8	5	55.9351	0.000102233	3.99041	0.000542589	2.09693	1	CF42	PF44	44129.1	PA2G4	Proliferation-associated protein 2G4 OS=Homo sapiens OX=9606 GN=PA2G4 PE=1 SV=3	381.624	398.071	428.684	402.793	2.60508	0.0592936	3	762	204.541	182.383	189.336	192.087	2.2835	0.0589952	3	1056	0.476887	-1.06828	DOWN
P03956	11	6	65.6818	7.63064e-05	4.11744	0.000450202	2.09218	1	CF42	PF44	54178.1	MMP1	Interstitial collagenase OS=Homo sapiens OX=9606 GN=MMP1 PE=1 SV=3	1185.99	1109.07	1167.58	1154.21	3.06229	0.0347987	3	406	589.484	514.054	551.495	551.678	2.74169	0.0683655	3	665	0.47797	-1.06501	DOWN
O95573	5	1	26.079	0.010985	1.9592	0.0102186	2.08023	0.909829	CF42	PF44	81389.7	ACSL3	Long-chain-fatty-acid--CoA ligase 3 OS=Homo sapiens OX=9606 GN=ACSL3 PE=1 SV=3	183.727	210.204	206.003	199.978	2.30098	0.0711582	3	1033	129.666	80.9612	77.7701	96.1325	1.98287	0.30255	3	1260	0.480715	-1.05675	DOWN
P36871;P36871-2;P36871-3	9	6	47.6705	0.000832152	3.0798	0.00198013	2.03562	0.999993	CF42	PF44	61734.4	PGM1	Phosphoglucomutase-1 OS=Homo sapiens OX=9606 GN=PGM1 PE=1 SV=3	266.203	287.585	279.204	277.664	2.44352	0.0388019	3	919	125.973	125.371	157.863	136.402	2.13482	0.136273	3	1157	0.49125	-1.02547	DOWN
P61163;R4GMT0;A0A1B0GVS3;P42025	6	2	30.526	0.054084	1.26693	0.0309345	2.00799	0.535077	CF42	PF44	42727.9	ACTR1A	Alpha-centractin OS=Homo sapiens OX=9606 GN=ACTR1A PE=1 SV=1	187.239	361.257	370.784	306.427	2.48633	0.337207	3	881	181.162	128.198	148.452	152.604	2.18357	0.175127	3	1119	0.498011	-1.00575	DOWN
P52209;P52209-2;K7EM49;K7EMN2;K7EPF6;K7ELN9	12	8	85.3251	9.10578e-06	5.04068	0.000104222	1.98255	1	CF42	PF44	53653.3	PGD	6-phosphogluconate dehydrogenase_ decarboxylating OS=Homo sapiens OX=9606 GN=PGD PE=1 SV=3	2790.43	2729.38	2756.41	2758.74	3.44071	0.0110891	3	192	1333.65	1445	1395.88	1391.51	3.14349	0.0401047	3	349	0.5044	-0.98736	DOWN
Q29RF7	5	1	15.9991	0.0181195	1.74185	0.0145325	1.96937	0.819101	CF42	PF44	152370	PDS5A	Sister chromatid cohesion protein PDS5 homolog A OS=Homo sapiens OX=9606 GN=PDS5A PE=1 SV=1	127	101.551	174.382	134.311	2.12811	0.275194	3	1179	59.9514	75.0473	69.6014	68.2	1.83378	0.112095	3	1340	0.507777	-0.977734	DOWN
Q9NZN3	3	1	19.8155	0.00454167	2.34278	0.00570284	1.94394	0.98596	CF42	PF44	60944.3	EHD3	EH domain-containing protein 3 OS=Homo sapiens OX=9606 GN=EHD3 PE=1 SV=2	136.497	128.864	158.224	141.195	2.14982	0.107888	3	1164	63.9218	87.6222	66.3563	72.6334	1.86114	0.179499	3	1322	0.51442	-0.958982	DOWN
P16949;P16949-2;A2A2D0;E5RGX5;Q93045;Q93045-2	5	2	32.2646	0.0217007	1.66353	0.0161982	1.94107	0.778295	CF42	PF44	17302.5	STMN1	Stathmin OS=Homo sapiens OX=9606 GN=STMN1 PE=1 SV=3	273.931	211.729	276.421	254.027	2.40488	0.144286	3	952	133.589	93.8177	165.202	130.87	2.11684	0.273323	3	1176	0.51518	-0.956851	DOWN
P55884;P55884-2;C9JQN7;C9JZG1	4	2	18.7649	0.00336437	2.4731	0.00475088	1.93773	0.994162	CF42	PF44	92880.9	EIF3B	Eukaryotic translation initiation factor 3 subunit B OS=Homo sapiens OX=9606 GN=EIF3B PE=1 SV=3	524.195	396.497	517.579	479.424	2.68072	0.149956	3	718	271.396	226.205	244.644	247.415	2.39343	0.0918412	3	955	0.516067	-0.954369	DOWN
P11413;P11413-3;P11413-2;E7EM57;E7EUI8;E9PD92	14	8	88.0574	0.000404921	3.39263	0.00123686	1.93327	1	CF42	PF44	59713.1	G6PD	Glucose-6-phosphate 1-dehydrogenase OS=Homo sapiens OX=9606 GN=G6PD PE=1 SV=4	965.064	864.251	880.225	903.18	2.95577	0.0599937	3	476	422.899	478.501	500.135	467.178	2.66948	0.0852847	3	729	0.517259	-0.951041	DOWN
F5H365;Q15436;Q15436-2;G3V1W4;G3V2R6;G3V3G5;G3V4V1;G3V4Q2;G3V5X8;Q5QPE2	11	6	73.1344	0.000751887	3.12385	0.00185269	1.92318	0.999996	CF42	PF44	83881.8	SEC23A	Protein transport protein SEC23 OS=Homo sapiens OX=9606 GN=SEC23A PE=1 SV=1	840.591	929.067	942.751	904.136	2.95623	0.0613357	3	474	527.095	453.035	430.249	470.127	2.67221	0.107705	3	728	0.519973	-0.94349	DOWN
Q6IS14;C9J4W5;C9J7B5;F8WCJ1;I3L397;I3L504;P63241;P63241-2;Q9GZV4	4	4	13.2344	1.53668e-05	4.81342	0.000146016	1.92272	1	CF42	PF44	17001.3	EIF5AL1	Eukaryotic translation initiation factor 5A-1-like OS=Homo sapiens OX=9606 GN=EIF5AL1 PE=2 SV=2	994.467	1002.31	1069.35	1022.04	3.00947	0.0402679	3	441	518.346	539.239	537.093	531.559	2.72555	0.0216213	3	683	0.520096	-0.943151	DOWN
P01023;P20742;P20742-2	8	1	35.8206	0.0031149	2.50656	0.00450191	1.8985	0.995454	CF42	PF44	164717	A2M	Alpha-2-macroglobulin OS=Homo sapiens OX=9606 GN=A2M PE=1 SV=3	791.964	798.172	709.543	766.56	2.88455	0.0645418	3	534	349.195	382.333	479.786	403.772	2.60614	0.168124	3	778	0.526732	-0.924859	DOWN
P07602;C9JIZ6;P07602-2;P07602-3;Q5BJH1;A0A0J9YXB8	8	6	41.488	0.000220213	3.65716	0.000817625	1.87611	1	CF42	PF44	59937.6	PSAP	Prosaposin OS=Homo sapiens OX=9606 GN=PSAP PE=1 SV=2	3760	3286.65	3277.3	3441.32	3.53672	0.0802092	3	159	1896.07	1834.44	1772.35	1834.29	3.26347	0.0337258	3	291	0.533019	-0.907742	DOWN
P11532;P11532-4;A0A075B6G3;A0A087WTU7;A0A087WV90;E9PDN5;P11532-2;P11532-3;E7EQR9;E7EQS5;E7ESB2;F8VX32;H0Y304;Q4G0X0;F5GZY3;P11532-5;P11532-6;P11532-7;P11532-8	24	1	85.6799	0.010069	1.99701	0.00974529	1.86574	0.921911	CF42	PF44	428803	DMD	Dystrophin OS=Homo sapiens OX=9606 GN=DMD PE=1 SV=3	412.876	378.711	455.208	415.598	2.61867	0.0922065	3	752	169.808	250.01	248.439	222.752	2.34782	0.20587	3	1001	0.53598	-0.89975	DOWN
A0A0U1RQF0;P49327;A0A0U1RRG3;J3KTF0	27	10	167.129	0.000941395	3.02623	0.00213397	1.85613	0.999983	CF42	PF44	275822	FASN	Fatty acid synthase OS=Homo sapiens OX=9606 GN=FASN PE=1 SV=1	1296.56	1110.41	1063.12	1156.7	3.06322	0.106694	3	404	578.942	650.919	639.674	623.178	2.79461	0.0621335	3	618	0.538755	-0.892299	DOWN
E9PGM4;Q04446	7	3	34.8526	0.00542678	2.26546	0.00640352	1.84915	0.97788	CF42	PF44	76416.2	GBE1	1_4-alpha-glucan-branching enzyme OS=Homo sapiens OX=9606 GN=GBE1 PE=1 SV=1	95.584	121.61	101.84	106.345	2.02672	0.127749	3	1240	53.1553	67.8198	51.555	57.51	1.75974	0.155874	3	1366	0.540789	-0.886863	DOWN
A0A2R8Y6J6;Q9Y5Y9;A0A2R8Y7H0;A0A2R8YDP4;Q15858;Q15858-2;Q15858-3;Q15858-4	5	2	18.5302	0.0188458	1.72479	0.0148659	1.82713	0.810536	CF42	PF44	222779	SCN10A	Sodium channel protein OS=Homo sapiens OX=9606 GN=SCN10A PE=3 SV=1	207.486	176.953	221.097	201.845	2.30502	0.111997	3	1031	85.8371	102.918	142.659	110.471	2.04325	0.263908	3	1222	0.547306	-0.86958	DOWN
P21964;P21964-2;E7EMS6	3	1	16.5257	0.00377214	2.42341	0.0049507	1.82214	0.991697	CF42	PF44	30493.3	COMT	Catechol O-methyltransferase OS=Homo sapiens OX=9606 GN=COMT PE=1 SV=2	1148.5	1103.36	1002.82	1084.89	3.03539	0.0687384	3	428	706.972	556.336	522.878	595.395	2.77481	0.164707	3	631	0.548805	-0.865634	DOWN
Q96J02;Q96J02-2;Q96J02-3	2	1	9.288	1.79573e-05	4.74576	0.000161127	1.81638	1	CF42	PF44	103658	ITCH	E3 ubiquitin-protein ligase Itchy homolog OS=Homo sapiens OX=9606 GN=ITCH PE=1 SV=2	1119.94	1099.49	1087.85	1102.43	3.04235	0.0147362	3	418	627.588	579.966	613.26	606.938	2.78314	0.0402552	3	623	0.550545	-0.861067	DOWN
Q2M243;J3QKX2	7	1	26.9359	0.00643185	2.19166	0.00731026	1.81513	0.967238	CF42	PF44	75867.9	CCDC27	Coiled-coil domain-containing protein 27 OS=Homo sapiens OX=9606 GN=CCDC27 PE=2 SV=2	284.82	217.381	255.981	252.727	2.40265	0.133888	3	954	162.759	123.915	131.027	139.234	2.14374	0.148537	3	1153	0.550925	-0.860073	DOWN
A0A087WUL2;P49720;A0A087WXQ8;A0A087WY10	3	2	19.2648	0.000730441	3.13642	0.00183565	1.7988	0.999997	CF42	PF44	16389.2	PSMB3	Proteasome subunit beta type-3 (Fragment) OS=Homo sapiens OX=9606 GN=PSMB3 PE=1 SV=1	968.85	977.661	1018.4	988.302	2.99489	0.0267439	3	448	527.828	503.57	616.873	549.424	2.73991	0.108585	3	666	0.555927	-0.847033	DOWN
Q13642;Q13642-1;Q13642-4;Q13642-5;Q5JXI8;A0A0D9SFB0;A0A0D9SFI6;A0A0D9SFZ9;A0A0D9SG53;A0A0D9SGB2;Q13642-3;Q5JXH7;Q5JXH8;Q5JXH9;Q5JXI0;Q5JXI2;Q5JXI3;A0A0D9SGD1	4	2	20.6815	0.0169522	1.77077	0.0137759	1.76027	0.83317	CF42	PF44	38030.9	FHL1	Four and a half LIM domains protein 1 OS=Homo sapiens OX=9606 GN=FHL1 PE=1 SV=4	143.226	191.185	167.861	167.424	2.22382	0.143243	3	1098	74.0195	104.645	106.674	95.1129	1.97824	0.192357	3	1261	0.568095	-0.815795	DOWN
P29966	4	3	20.6291	0.00143128	2.84428	0.00281546	1.75922	0.999818	CF42	PF44	31725.8	MARCKS	Myristoylated alanine-rich C-kinase substrate OS=Homo sapiens OX=9606 GN=MARCKS PE=1 SV=4	472.781	488.376	505.949	489.036	2.68934	0.033931	3	707	258.916	256.915	318.124	277.985	2.44402	0.1251	3	919	0.568435	-0.814933	DOWN
P54652	15	4	110.995	3.03826e-05	4.51737	0.000232413	1.75811	1	CF42	PF44	70306.2	HSPA2	Heat shock-related 70 kDa protein 2 OS=Homo sapiens OX=9606 GN=HSPA2 PE=1 SV=1	1238.22	1198.67	1193.69	1210.19	3.08285	0.0201629	3	393	722.138	672.292	670.614	688.348	2.83781	0.0425293	3	582	0.568792	-0.814027	DOWN
Q9P2E7;Q9P2E7-2	4	1	15.686	0.00928671	2.03214	0.00917371	1.75206	0.93214	CF42	PF44	114305	PCDH10	Protocadherin-10 OS=Homo sapiens OX=9606 GN=PCDH10 PE=2 SV=2	552.167	796.344	672.736	673.749	2.8285	0.181213	3	573	347.738	412.468	393.436	384.547	2.58495	0.0865121	3	795	0.570758	-0.80905	DOWN
P35613;A0A087X2B5;I3L192;P35613-2;A0A087WUV8;P35613-3;P35613-4;R4GMX5;R4GN83;A0A2R8YDZ0	5	3	25.6034	9.38268e-05	4.02767	0.000511528	1.74158	1	CF42	PF44	42599.6	BSG	Basigin OS=Homo sapiens OX=9606 GN=BSG PE=1 SV=2	641.882	607.411	588.914	612.736	2.78727	0.0438726	3	613	346.439	340.211	368.833	351.828	2.54633	0.042785	3	820	0.574191	-0.800396	DOWN
Q9BXX2	2	1	7.8283	0.0436427	1.36009	0.026662	1.71659	0.5947	CF42	PF44	159589	ANKRD30B	Ankyrin repeat domain-containing protein 30B OS=Homo sapiens OX=9606 GN=ANKRD30B PE=2 SV=3	204.003	242.158	215.999	220.72	2.34384	0.0883962	3	1002	171.494	88.6806	125.567	128.58	2.10917	0.322669	3	1184	0.58255	-0.779547	DOWN
P40121;P40121-2;B8ZZL6;E7ENU9;H7C0X8	8	4	51.3439	0.000898944	3.04627	0.00204852	1.71403	0.999988	CF42	PF44	38783.7	CAPG	Macrophage-capping protein OS=Homo sapiens OX=9606 GN=CAPG PE=1 SV=2	1873.18	2065.42	1851.76	1930.12	3.28559	0.0609608	3	270	1212.03	1144.56	1021.62	1126.07	3.05157	0.0857349	3	411	0.58342	-0.777394	DOWN
P20339;P20339-2;F8VUA5;F8VVK3;F8VVZ0;F8VWU4	7	4	35.2856	0.000174751	3.75758	0.000704544	1.71141	1	CF42	PF44	23886.8	RAB5A	Ras-related protein Rab-5A OS=Homo sapiens OX=9606 GN=RAB5A PE=1 SV=2	1300.61	1379.67	1239.18	1306.49	3.1161	0.05391	3	370	773.091	727.027	790.077	763.398	2.88275	0.0427346	3	545	0.584314	-0.775185	DOWN
Q9H299;Q5T123	3	2	19.5519	5.40672e-05	4.26707	0.000356436	1.70983	1	CF42	PF44	10494.8	SH3BGRL3	SH3 domain-binding glutamic acid-rich-like protein 3 OS=Homo sapiens OX=9606 GN=SH3BGRL3 PE=1 SV=1	907.334	847.429	842.251	865.671	2.93735	0.0417868	3	493	500.909	523.611	494.352	506.291	2.7044	0.0303261	3	707	0.584853	-0.773853	DOWN
P04179;P04179-4;P04179-2;P04179-3	5	1	34.497	0.00110902	2.95506	0.00233	1.70805	0.999955	CF42	PF44	24921.3	SOD2	Superoxide dismutase [Mn]_ mitochondrial OS=Homo sapiens OX=9606 GN=SOD2 PE=1 SV=3	2877.15	2570.05	2377.92	2608.37	3.41637	0.0965404	3	202	1592.91	1553.3	1435.1	1527.1	3.18387	0.0537643	3	326	0.585462	-0.772353	DOWN
Q9NR30;Q9NR30-2	11	3	60.8732	0.00475414	2.32293	0.005867	1.70175	0.984152	CF42	PF44	87857.8	DDX21	Nucleolar RNA helicase 2 OS=Homo sapiens OX=9606 GN=DDX21 PE=1 SV=5	131.608	150.105	122.301	134.671	2.12927	0.105091	3	1177	88.4834	79.9599	68.9671	79.1368	1.89838	0.123636	3	1299	0.58763	-0.76702	DOWN
Q9UJX3;Q9UJX3-2	3	1	13.7522	0.0442029	1.35455	0.0268426	1.6935	0.591155	CF42	PF44	67483	ANAPC7	Anaphase-promoting complex subunit 7 OS=Homo sapiens OX=9606 GN=ANAPC7 PE=1 SV=4	269.358	295.58	170.016	244.985	2.38914	0.270365	3	962	150.924	143.054	140.007	144.662	2.16035	0.0389432	3	1140	0.590493	-0.760007	DOWN
A0AVT1;A0AVT1-2;A0AVT1-3;A0AVT1-4;H0Y8S8	7	1	28.4232	0.00358549	2.44545	0.00482424	1.69081	0.992878	CF42	PF44	119282	UBA6	Ubiquitin-like modifier-activating enzyme 6 OS=Homo sapiens OX=9606 GN=UBA6 PE=1 SV=1	536.752	625.976	484.185	548.971	2.73955	0.130574	3	661	331.942	342.671	299.425	324.679	2.51145	0.0693585	3	858	0.591432	-0.757715	DOWN
O75534;O75534-2;O75534-3;O75534-4;E9PLT0;E9PLD4;E9PKN4	7	2	41.7115	0.0005764	3.23928	0.00157122	1.68927	1	CF42	PF44	89740.2	CSDE1	Cold shock domain-containing protein E1 OS=Homo sapiens OX=9606 GN=CSDE1 PE=1 SV=2	435.24	377.887	429.69	414.272	2.61729	0.0763573	3	754	232.582	248.377	254.755	245.238	2.38959	0.0465455	3	959	0.591973	-0.756398	DOWN
Q9P2P6;Q9P2P6-2;Q9P2P6-3	18	2	69.6234	0.00281645	2.5503	0.00425066	1.68828	0.996775	CF42	PF44	522161	STARD9	StAR-related lipid transfer protein 9 OS=Homo sapiens OX=9606 GN=STARD9 PE=1 SV=3	298.802	291.031	295.404	295.079	2.46994	0.0132024	3	901	182.812	193.24	148.29	174.781	2.24249	0.134605	3	1080	0.592318	-0.755557	DOWN
P54886;P54886-2	6	2	37.8705	0.0431726	1.36479	0.0264498	1.68466	0.597708	CF42	PF44	88043.8	ALDH18A1	Delta-1-pyrroline-5-carboxylate synthase OS=Homo sapiens OX=9606 GN=ALDH18A1 PE=1 SV=2	253.157	372.118	252.272	292.516	2.46615	0.235676	3	907	200.485	185.754	134.665	173.635	2.23964	0.198941	3	1083	0.593591	-0.752459	DOWN
Q9H0A9;Q9H0A9-2	4	1	15.298	0.000254038	3.5951	0.000896826	1.67683	1	CF42	PF44	37955.1	SPATC1L	Speriolin-like protein OS=Homo sapiens OX=9606 GN=SPATC1L PE=1 SV=3	171.534	177.609	178.869	176.004	2.24552	0.0222849	3	1082	96.7878	110.247	107.852	104.962	2.02103	0.0684042	3	1239	0.596364	-0.745734	DOWN
G3V3R6;P17931	5	2	31.4464	0.0035318	2.452	0.00479851	1.67326	0.993202	CF42	PF44	24143	LGALS3	Galectin OS=Homo sapiens OX=9606 GN=LGALS3 PE=1 SV=1	570.73	584.868	565.233	573.61	2.75862	0.0176585	3	643	311.242	314.515	402.676	342.811	2.53505	0.151309	3	838	0.597637	-0.742658	DOWN
Q8WX93;Q8WX93-2;Q8WX93-3;Q8WX93-5;Q8WX93-9;Q8WX93-8;Q8WX93-4;Q8WX93-7;H0Y952;Q8WX93-6;H0YA05;F8WA26	11	3	56.2956	0.0153262	1.81457	0.0129176	1.65845	0.853363	CF42	PF44	151933	PALLD	Palladin OS=Homo sapiens OX=9606 GN=PALLD PE=1 SV=3	401.36	409.084	389.95	400.131	2.6022	0.024058	3	765	300.401	193.621	229.784	241.269	2.3825	0.225095	3	969	0.602974	-0.729833	DOWN
P05556;P05556-2;P05556-3;P05556-4;P05556-5;C9JPK5;E7EQW5;E7EUI6;E9PLR6;Q5T3E6;E7ERX5;H7C4N8;C9JJP8;E9PQJ2;Q5T3E5	17	11	139.418	4.57108e-05	4.33998	0.000317539	1.64314	1	CF42	PF44	91723	ITGB1	Integrin beta-1 OS=Homo sapiens OX=9606 GN=ITGB1 PE=1 SV=2	4130.56	4342.82	4080.12	4184.5	3.62164	0.0333151	3	126	2466.12	2624.33	2549.5	2546.65	3.40597	0.031078	3	211	0.608592	-0.716454	DOWN
P31153;P31153-2	4	1	23.7664	0.000514865	3.28831	0.00143993	1.63702	1	CF42	PF44	44002.9	MAT2A	S-adenosylmethionine synthase isoform type-2 OS=Homo sapiens OX=9606 GN=MAT2A PE=1 SV=1	1624.95	1869.47	1732.4	1742.27	3.24112	0.070342	3	298	1120.12	1037.62	1035.14	1064.29	3.02706	0.0454409	3	436	0.610865	-0.711074	DOWN
Q13509;A0A0B4J269;Q13509-2;G3V2A3;G3V2N6;G3V2R8;G3V3R4;G3V5W4;G3V3J6;G3V3W7	25	5	284.737	0.000122028	3.91354	0.0005517	1.61028	1	CF42	PF44	50889	TUBB3	Tubulin beta-3 chain OS=Homo sapiens OX=9606 GN=TUBB3 PE=1 SV=2	776.116	801.262	771.463	782.947	2.89373	0.0204751	3	528	515.879	471.892	470.883	486.218	2.68683	0.0528414	3	719	0.62101	-0.687311	DOWN
P62861;E9PR30	2	1	8.1137	0.00339151	2.46961	0.00476782	1.60457	0.994011	CF42	PF44	6647.87	FAU	40S ribosomal protein S30 OS=Homo sapiens OX=9606 GN=FAU PE=1 SV=1	840.516	761.389	667.596	756.5	2.87881	0.114427	3	536	505.164	452.451	456.787	471.467	2.67345	0.0620669	3	727	0.623221	-0.682183	DOWN
P09493;A0A0S2Z4G6;P09493-9;P09493-10;P09493-3;P09493-4;Q6ZN40;H0YKP3;H0YKX5;H0YK48;H0YKJ4;P09493-5;B7Z596;F5H7S3;H7BYY1;H0YL80;A0A087WTJ7;H0YKZ6;H0YK20;H0YL42	16	4	114.823	0.00744354	2.12822	0.00805294	1.60395	0.955406	CF42	PF44	32765.6	TPM1	Tropomyosin alpha-1 chain OS=Homo sapiens OX=9606 GN=TPM1 PE=1 SV=2	613.65	697.678	711.177	674.168	2.82877	0.078383	3	572	427.628	357.606	475.718	420.317	2.62358	0.141309	3	762	0.62346	-0.681631	DOWN
P48047;H7C0C1;H7C068;H7C086	5	4	34.4784	0.0307465	1.5122	0.020887	1.59853	0.690372	CF42	PF44	23391.4	ATP5PO	ATP synthase subunit O_ mitochondrial OS=Homo sapiens OX=9606 GN=ATP5PO PE=1 SV=1	485.936	338.008	341.059	388.334	2.58921	0.217698	3	778	254.919	265.042	208.836	242.932	2.38549	0.123323	3	965	0.625575	-0.676746	DOWN
A6NMH8;E9PIF1;E9PJK1;E9PRJ8;H0YDJ9;H0YDL9;P60033;E9PM31;H0YEE2	2	2	11.8977	0.00162392	2.78943	0.00313639	1.59573	0.999662	CF42	PF44	30547.3	CD81	Tetraspanin OS=Homo sapiens OX=9606 GN=CD81 PE=1 SV=1	627.615	709.307	712.956	683.292	2.83461	0.0706177	3	565	468.013	408.522	408.068	428.201	2.63165	0.0805214	3	759	0.626673	-0.674215	DOWN
Q9C0G6;Q9C0G6-4;Q9C0G6-2;Q9C0G6-3	29	3	115.491	0.000691374	3.16029	0.00180467	1.5826	0.999998	CF42	PF44	479975	DNAH6	Dynein heavy chain 6_ axonemal OS=Homo sapiens OX=9606 GN=DNAH6 PE=2 SV=3	424.959	486.509	477.033	462.834	2.66542	0.0716048	3	729	281.835	305.438	290.081	292.451	2.46605	0.04096	3	902	0.631871	-0.662297	DOWN
Q86VH2;Q86VH2-2;Q86VH2-3;Q86VH2-4;H7C4Y3	10	1	45.0283	0.000180218	3.7442	0.000718693	1.57849	1	CF42	PF44	161424	KIF27	Kinesin-like protein KIF27 OS=Homo sapiens OX=9606 GN=KIF27 PE=2 SV=1	833.344	937.023	882.758	884.375	2.94664	0.0586384	3	483	562.76	561.483	556.554	560.266	2.74839	0.00584854	3	662	0.633516	-0.658548	DOWN
Q8N4C6-10;Q8N4C6-7;C9J066;E9PN67;H0YDJ4;H9KV85;Q8N4C6;Q8N4C6-2;Q8N4C6-4;Q8N4C6-5;Q8N4C6-9	6	1	25.7711	0.052701	1.27818	0.0304672	1.57308	0.54226	CF42	PF44	248189	NIN	Isoform 3 of Ninein OS=Homo sapiens OX=9606 GN=NIN	385.526	380.307	324.586	363.473	2.56047	0.0929309	3	808	311.096	179.521	202.559	231.059	2.36372	0.3041	3	986	0.635697	-0.65359	DOWN
P02792	6	3	35.0149	1.74305e-05	4.75869	0.000159728	1.57167	1	CF42	PF44	20076.7	FTL	Ferritin light chain OS=Homo sapiens OX=9606 GN=FTL PE=1 SV=2	3064.31	3025.86	3001.08	3030.42	3.4815	0.0105127	3	178	1907.58	1995.29	1881.56	1928.15	3.28514	0.0309046	3	276	0.636264	-0.652303	DOWN
P41229;P41229-2;P41229-5	3	1	11.6342	0.0462184	1.33518	0.0275325	1.56555	0.578755	CF42	PF44	178401	KDM5C	Lysine-specific demethylase 5C OS=Homo sapiens OX=9606 GN=KDM5C PE=1 SV=2	111.657	125.266	139.434	125.453	2.09848	0.110714	3	1198	102.918	76.2578	61.2239	80.1334	1.90381	0.263507	3	1297	0.638754	-0.646667	DOWN
Q03135;E9PCT5;C9JKI3;Q03135-2;P56539	5	4	35.6566	0.00792008	2.10127	0.00831985	1.56515	0.949556	CF42	PF44	20642.7	CAV1	Caveolin-1 OS=Homo sapiens OX=9606 GN=CAV1 PE=1 SV=4	1295.94	1745.6	1606.28	1549.28	3.19013	0.148578	3	321	976.649	1012.78	980.137	989.856	2.99557	0.0201358	3	458	0.638916	-0.646302	DOWN
P14618-2;H3BTN5;H3BR70	36	2	420.38	0.000218568	3.66041	0.000817625	1.56484	1	CF42	PF44	58575.5	PKM	Isoform M1 of Pyruvate kinase PKM OS=Homo sapiens OX=9606 GN=PKM	451.727	486.021	447.776	461.841	2.66449	0.0455419	3	731	308.713	285.149	291.548	295.136	2.47002	0.0412859	3	899	0.639043	-0.646016	DOWN
P0CG47	8	1	54.7106	0.00172172	2.76404	0.00321156	1.54765	0.999556	CF42	PF44	25818.7	UBB	Polyubiquitin-B OS=Homo sapiens OX=9606 GN=UBB PE=1 SV=1	190.019	181.043	167.874	179.645	2.25442	0.0620013	3	1074	120.527	122.066	105.636	116.076	2.06474	0.0781796	3	1213	0.646142	-0.630076	DOWN
P09496-2;P09496;P09496-3;P09496-4;P09496-5;C9J8P9;F8WF69	4	1	25.893	0.00434712	2.3618	0.00552295	1.539	0.987535	CF42	PF44	23719	CLTA	Isoform Non-brain of Clathrin light chain A OS=Homo sapiens OX=9606 GN=CLTA	2247.33	2565.09	1999.64	2270.69	3.35616	0.124829	3	233	1468.51	1513.87	1443.91	1475.43	3.16892	0.0240539	3	331	0.649772	-0.621993	DOWN
Q14247;Q14247-3;H0YEV2	11	1	59.4933	0.000765287	3.11618	0.00186218	1.5339	0.999996	CF42	PF44	61757.3	CTTN	Src substrate cortactin OS=Homo sapiens OX=9606 GN=CTTN PE=1 SV=2	1652.94	1440.08	1457.33	1516.78	3.18092	0.0779491	3	329	962.488	998.21	1005.82	988.838	2.99513	0.0233962	3	460	0.651932	-0.617206	DOWN
P17813;P17813-2;F5GX88	6	3	31.3832	0.000846559	3.07234	0.00198103	1.53275	0.999992	CF42	PF44	71604.7	ENG	Endoglin OS=Homo sapiens OX=9606 GN=ENG PE=1 SV=2	201.845	203.418	197.621	200.961	2.30311	0.0149171	3	1032	120.097	141.189	132.049	131.112	2.11764	0.0806723	3	1173	0.652423	-0.616121	DOWN
P49411	9	6	46.8526	0.00530478	2.27533	0.00629405	1.5135	0.979075	CF42	PF44	49883.8	TUFM	Elongation factor Tu_ mitochondrial OS=Homo sapiens OX=9606 GN=TUFM PE=1 SV=2	304.428	278.664	320.788	301.293	2.47899	0.0704835	3	890	225.037	184.375	187.801	199.071	2.29901	0.11329	3	1046	0.660722	-0.597884	DOWN
O43795;E9PDF6;O43795-2;H7C2Y7;A0A0U1RRI3;C9JUP5;C9JYW1;E7EQD9	12	3	61.5945	0.003527	2.45259	0.00479851	1.51019	0.99323	CF42	PF44	133012	MYO1B	Unconventional myosin-Ib OS=Homo sapiens OX=9606 GN=MYO1B PE=1 SV=3	581.402	474.944	527.683	528.01	2.72264	0.100811	3	676	327.803	358.496	362.596	349.632	2.54361	0.0543844	3	826	0.662169	-0.594728	DOWN
G3V3M6;G3V5Q1;P27695	3	1	17.1086	0.0125335	1.90193	0.0112461	1.49678	0.889401	CF42	PF44	29475.2	APEX1	DNA-(apurinic or apyrimidinic site) lyase (Fragment) OS=Homo sapiens OX=9606 GN=APEX1 PE=1 SV=1	369.949	317.82	341.607	343.125	2.53545	0.076059	3	837	268.834	205.391	213.502	229.242	2.36029	0.150613	3	990	0.668101	-0.581861	DOWN
A0A0C4DGA6;Q14527;Q14527-2;H7C5K0	8	1	31.9283	0.0302424	1.51938	0.0206422	1.49484	0.694754	CF42	PF44	114884	HLTF	Helicase-like transcription factor OS=Homo sapiens OX=9606 GN=HLTF PE=1 SV=1	715.33	702.629	792.898	736.952	2.86744	0.0663064	3	546	566.245	383.468	529.282	492.998	2.69285	0.196024	3	716	0.668969	-0.579989	DOWN
Q16643;Q16643-2;Q16643-3;D6R9Q9;D6R9W4	5	2	23.2096	0.0220138	1.65731	0.0162628	1.49215	0.774898	CF42	PF44	71885.6	DBN1	Drebrin OS=Homo sapiens OX=9606 GN=DBN1 PE=1 SV=4	437.098	527.332	473.095	479.175	2.68049	0.0947951	3	719	330.086	264.536	368.769	321.13	2.50668	0.164078	3	865	0.670173	-0.577395	DOWN
P78357	3	1	8.8269	0.00322014	2.49213	0.00459237	1.48967	0.994929	CF42	PF44	158320	CNTNAP1	Contactin-associated protein 1 OS=Homo sapiens OX=9606 GN=CNTNAP1 PE=1 SV=1	668.567	583.006	601.403	617.659	2.79075	0.0729163	3	610	454.782	390.506	398.6	414.629	2.61766	0.0844312	3	766	0.671292	-0.574988	DOWN
H0Y390	23	2	81.9262	0.0155246	1.80898	0.0130085	1.48907	0.850864	CF42	PF44	508325	MACF1	Microtubule-actin cross-linking factor 1_ isoforms 1/2/3/5 (Fragment) OS=Homo sapiens OX=9606 GN=MACF1 PE=1 SV=1	193.61	240.879	225.494	219.994	2.34241	0.109594	3	1003	143.018	131.111	169.088	147.739	2.1695	0.131473	3	1130	0.671559	-0.574415	DOWN
D6RE83;P09936;D6R956;D6R974	3	2	17.784	0.00875729	2.05763	0.00875109	1.48496	0.938975	CF42	PF44	23459.7	UCHL1	Ubiquitin carboxyl-terminal hydrolase OS=Homo sapiens OX=9606 GN=UCHL1 PE=1 SV=1	165.244	183.304	168.548	172.365	2.23645	0.0557882	3	1089	100.138	130.733	117.351	116.074	2.06473	0.132134	3	1214	0.673417	-0.570427	DOWN
P08962;P08962-2;F8VWK8;F8W022;F8VNT9;F8VV56;P08962-3	9	5	43.7107	0.000716359	3.14487	0.00183373	1.48324	0.999997	CF42	PF44	26492.1	CD63	CD63 antigen OS=Homo sapiens OX=9606 GN=CD63 PE=1 SV=2	1919.45	2006.53	1852.59	1926.19	3.2847	0.0400734	3	273	1230.96	1386.68	1278.26	1298.63	3.11349	0.0614738	3	371	0.674198	-0.568755	DOWN
P48681	21	12	105.49	0.0467086	1.3306	0.0277096	1.48219	0.575819	CF42	PF44	177895	NES	Nestin OS=Homo sapiens OX=9606 GN=NES PE=1 SV=2	879.928	668.109	582.306	710.114	2.85133	0.215729	3	556	517.647	427.327	492.322	479.099	2.68043	0.0972434	3	723	0.674678	-0.567728	DOWN
E9PAV3;E9PAV3-2;F8VZJ2;H0YHX9;Q13765;F8VNW4;F8W0W4;F8W1N5;F8VZ58;Q9BZK3	7	2	48.0247	0.0119825	1.92145	0.0108649	1.48001	0.896654	CF42	PF44	206106	NACA	Nascent polypeptide-associated complex subunit alpha_ muscle-specific form OS=Homo sapiens OX=9606 GN=NACA PE=1 SV=1	1657.2	1793.97	1679.3	1710.16	3.23304	0.0429341	3	303	983.75	1334.46	1148.3	1155.5	3.06277	0.151851	3	401	0.675671	-0.565607	DOWN
P07996;P07996-2;A8MZG1	12	10	72.8362	0.00252352	2.59799	0.00402543	1.47905	0.997832	CF42	PF44	133375	THBS1	Thrombospondin-1 OS=Homo sapiens OX=9606 GN=THBS1 PE=1 SV=2	1397.11	1407.83	1413.52	1406.15	3.14803	0.00592417	3	352	1064.7	888.007	899.435	950.713	2.97805	0.104005	3	474	0.676109	-0.564671	DOWN
Q12907;D6RBV2;D6RDX1;D6RIU4;D6RBH1	5	2	27.8476	0.00501942	2.29935	0.0061377	1.4761	0.981773	CF42	PF44	40570.9	LMAN2	Vesicular integral-membrane protein VIP36 OS=Homo sapiens OX=9606 GN=LMAN2 PE=1 SV=1	393.785	426.886	347.57	389.414	2.59041	0.102304	3	776	250.301	259.507	281.632	263.813	2.4213	0.0610403	3	935	0.677463	-0.561786	DOWN
Q86UQ4;A0A0A0MT16;Q86UQ4-4;Q86UQ4-3;F5H7B7;Q86UQ4-5;Q86UQ4-6;Q86UQ4-7;H0Y4D2;H7C0U5	17	4	54.3769	0.0142127	1.84732	0.0122919	1.47332	0.867553	CF42	PF44	580894	ABCA13	ATP-binding cassette sub-family A member 13 OS=Homo sapiens OX=9606 GN=ABCA13 PE=2 SV=3	1582.24	1317.23	1244.97	1381.48	3.14034	0.128541	3	359	1025.23	839.607	948.162	937.666	2.97205	0.0994546	3	478	0.678741	-0.559066	DOWN
P15374;A0A087WTB8;Q5TBK7	4	3	23.9909	0.00726448	2.1388	0.00797049	1.46659	0.957564	CF42	PF44	26353.7	UCHL3	Ubiquitin carboxyl-terminal hydrolase isozyme L3 OS=Homo sapiens OX=9606 GN=UCHL3 PE=1 SV=1	448.276	525.253	563.88	512.47	2.70967	0.114841	3	688	334.061	372.004	342.224	349.43	2.54336	0.0571538	3	827	0.681854	-0.552466	DOWN
Q9Y623;J3QLR0	25	1	142.128	0.0445538	1.35111	0.026951	1.45995	0.588957	CF42	PF44	224041	MYH4	Myosin-4 OS=Homo sapiens OX=9606 GN=MYH4 PE=2 SV=2	130.252	158.071	149.781	146.035	2.16446	0.0978039	3	1152	88.1064	86.2514	125.725	100.027	2.00012	0.222675	3	1251	0.684957	-0.545914	DOWN
H3BPE7;P35637;P35637-2;A0A075B7D9;Q92804;Q92804-2	4	2	19.9697	0.00200481	2.69793	0.00359011	1.45339	0.999131	CF42	PF44	53725.1	FUS	RNA-binding protein FUS OS=Homo sapiens OX=9606 GN=FUS PE=1 SV=1	304.207	298.829	292.61	298.548	2.47501	0.0194381	3	895	216.719	214.586	184.941	205.415	2.31263	0.0864743	3	1026	0.688047	-0.539422	DOWN
Q07065	30	19	243.093	0.000425658	3.37094	0.00129105	1.45232	1	CF42	PF44	66136.6	CKAP4	Cytoskeleton-associated protein 4 OS=Homo sapiens OX=9606 GN=CKAP4 PE=1 SV=2	8229	7857.06	7803.12	7963.06	3.90108	0.0291202	3	61	5483.2	5772.6	5193.22	5483.01	3.73902	0.0528348	3	97	0.688555	-0.538355	DOWN
P13693;A0A0B4J2C3;Q5W0H4;E9PJF7;J3KPG2;P13693-2;Q56UQ5	4	2	23.3216	0.00248931	2.60392	0.00401548	1.45153	0.99794	CF42	PF44	19709.5	TPT1	Translationally-controlled tumor protein OS=Homo sapiens OX=9606 GN=TPT1 PE=1 SV=1	1604.78	1530.7	1820.89	1652.12	3.21804	0.0912626	3	309	1101.06	1144.28	1169.24	1138.19	3.05622	0.0303063	3	405	0.688927	-0.537578	DOWN
Q13162;H7C3T4;A6NG45	4	1	27.4127	0.00105563	2.97649	0.00229366	1.45117	0.999966	CF42	PF44	30768	PRDX4	Peroxiredoxin-4 OS=Homo sapiens OX=9606 GN=PRDX4 PE=1 SV=1	1472.13	1411.5	1470.94	1451.53	3.16182	0.0238815	3	338	950.454	965.261	1085.03	1000.25	3.00011	0.0737763	3	456	0.689101	-0.537213	DOWN
Q6V0I7;Q6V0I7-3;Q6V0I7-2	6	1	22.328	0.000140903	3.85108	0.000586159	1.45085	1	PF44	CF42	546622	FAT4	Protocadherin Fat 4 OS=Homo sapiens OX=9606 GN=FAT4 PE=1 SV=2	502.414	487.713	525.718	505.282	2.70353	0.0379275	3	692	712.216	741.918	745.124	733.086	2.86516	0.0247515	3	557	1.45085	0.536895	UP
P21796;C9JI87	10	5	67.6114	2.92624e-05	4.53369	0.000232413	1.451	1	PF44	CF42	30886.7	VDAC1	Voltage-dependent anion-selective channel protein 1 OS=Homo sapiens OX=9606 GN=VDAC1 PE=1 SV=2	1593.76	1555.95	1631.99	1593.9	3.20246	0.0238523	3	317	2272.68	2359.39	2306.17	2312.75	3.36413	0.018908	3	238	1.451	0.537046	UP
P51991;P51991-2;H7C1J8	5	5	33.689	6.67754e-05	4.17538	0.000422939	1.4583	1	PF44	CF42	39823.1	HNRNPA3	Heterogeneous nuclear ribonucleoprotein A3 OS=Homo sapiens OX=9606 GN=HNRNPA3 PE=1 SV=2	603.515	613.05	638.036	618.2	2.79113	0.0288374	3	608	880.415	899.02	925.126	901.52	2.95498	0.0249138	3	489	1.4583	0.544285	UP
P23528;E9PK25;E9PP50;G3V1A4;E9PQB7;E9PLJ3;E9PS23;G3V2U0	15	4	76.2406	0.00575667	2.23983	0.00670099	1.45856	0.974536	PF44	CF42	18730.6	CFL1	Cofilin-1 OS=Homo sapiens OX=9606 GN=CFL1 PE=1 SV=3	2130.31	2695.32	2356.75	2394.13	3.37915	0.118772	3	223	3361.75	3522.2	3592.01	3491.99	3.54307	0.0338105	3	151	1.45856	0.544549	UP
O75369;O75369-2;O75369-8;O75369-9;O75369-3;O75369-6;O75369-4;O75369-5;E7EN95;O75369-7;A0A0A0MT44;H7C5L4	37	17	253.488	3.68961e-05	4.43302	0.000260508	1.46371	1	PF44	CF42	280331	FLNB	Filamin-B OS=Homo sapiens OX=9606 GN=FLNB PE=1 SV=2	921.008	882.713	913.425	905.715	2.95699	0.0223893	3	472	1297.7	1318.7	1360.72	1325.71	3.12245	0.0242041	3	365	1.46371	0.549634	UP
P09601;B1AHA8	9	3	56.6416	0.00144468	2.84023	0.00281546	1.4682	0.999809	PF44	CF42	32818.7	HMOX1	Heme oxygenase 1 OS=Homo sapiens OX=9606 GN=HMOX1 PE=1 SV=1	393.158	337.63	356.679	362.489	2.55929	0.0778397	3	810	539.037	510.329	547.258	532.208	2.72608	0.03643	3	682	1.4682	0.554053	UP
O94979;D6REX3;O94979-10;O94979-2;O94979-3;O94979-4;O94979-6;O94979-8;O94979-9;D6RHZ5;O94979-5;H7BXG7;O94979-7;H0Y9T9;H0Y8W8;H0YAF5	7	5	34.4966	0.00752531	2.12348	0.00806247	1.46994	0.954413	PF44	CF42	133984	SEC31A	Protein transport protein Sec31A OS=Homo sapiens OX=9606 GN=SEC31A PE=1 SV=3	934.82	955.571	915.806	935.399	2.971	0.0212622	3	460	1493.8	1453.36	1177.77	1374.98	3.1383	0.125078	3	353	1.46994	0.555755	UP
A0A0C4DFN3;E7EWX8;H7C599;Q99685;Q99685-2;H7C4E0;C9J8Q3;H7C5K5	3	1	16.4475	0.0107024	1.97052	0.0101028	1.48703	0.913563	PF44	CF42	34520.7	MGLL	Monoglyceride lipase OS=Homo sapiens OX=9606 GN=MGLL PE=1 SV=1	349.439	369.373	385.758	368.19	2.56607	0.0493996	3	800	567.59	610.499	464.438	547.509	2.73839	0.137116	3	667	1.48703	0.572432	UP
O43781;O43781-2;Q5SY34	3	1	12.5882	0.0165329	1.78165	0.013486	1.48714	0.838313	PF44	CF42	66512.2	DYRK3	Dual specificity tyrosine-phosphorylation-regulated kinase 3 OS=Homo sapiens OX=9606 GN=DYRK3 PE=1 SV=3	270.198	263.762	207.427	247.129	2.39292	0.139738	3	959	407.043	337.457	358.044	367.515	2.56527	0.0972656	3	806	1.48714	0.572537	UP
P09211;A8MX94;A0A087X2E9;A0A087X243;A0A2R8Y5E5	9	5	86.4186	9.25809e-05	4.03348	0.000511207	1.51597	1	PF44	CF42	23584	GSTP1	Glutathione S-transferase P OS=Homo sapiens OX=9606 GN=GSTP1 PE=1 SV=2	4905.77	4573.76	4902.11	4793.88	3.68069	0.0397671	3	103	7298.68	7403.2	7100.3	7267.39	3.86138	0.0211706	3	76	1.51597	0.600243	UP
A0A087WXK5;J3QSS3;Q9BZC7;Q9BZC7-2;Q9BZC7-3;H0Y8C9;H0Y8D6	7	1	27.1014	0.0129897	1.8864	0.0115352	1.52976	0.883423	PF44	CF42	275403	ABCA2	ATP-binding cassette sub-family A member 2 OS=Homo sapiens OX=9606 GN=ABCA2 PE=1 SV=1	256.435	237.992	188.03	227.486	2.35695	0.155578	3	991	366.979	322.231	354.783	347.998	2.54158	0.066475	3	829	1.52976	0.613302	UP
H3BNX8;P20674;H3BRM5;H3BV69	3	2	17.8025	0.000306128	3.5141	0.00103006	1.53487	1	PF44	CF42	17463	COX5A	Cytochrome c oxidase subunit 5A_ mitochondrial OS=Homo sapiens OX=9606 GN=COX5A PE=1 SV=1	402.75	390.261	439.05	410.687	2.61351	0.0617126	3	757	641.003	618.234	631.813	630.35	2.79958	0.0181721	3	615	1.53487	0.618114	UP
P21333;P21333-2;F8WE98;H0Y5C6;H0Y5F3	117	14	821.501	3.21878e-05	4.49231	0.000239019	1.53518	1	PF44	CF42	283477	FLNA	Filamin-A OS=Homo sapiens OX=9606 GN=FLNA PE=1 SV=4	3556.81	3415.98	3471.43	3481.41	3.54175	0.0203786	3	157	5528.34	5251.83	5253.56	5344.58	3.72791	0.0297775	3	100	1.53518	0.618405	UP
Q15836	2	1	12.5903	0.00380092	2.42011	0.00496072	1.5366	0.991508	PF44	CF42	11366.1	VAMP3	Vesicle-associated membrane protein 3 OS=Homo sapiens OX=9606 GN=VAMP3 PE=1 SV=3	740.087	680.891	796.965	739.314	2.86883	0.0785061	3	545	1039.33	1115.5	1253.26	1136.03	3.05539	0.0954505	3	406	1.5366	0.61974	UP
Q5VU43;A0A075B749;A0A087WX83;A0A0A0MRM1;Q5VU43-4;A0A087WVF8;Q5VU43-3;Q5VU43-6;Q5VU43-7;E9PQG4;Q5VU43-13;Q5VU43-2;H0YCY0;H0YCH7	16	1	62.2401	0.0435434	1.36108	0.0266391	1.54709	0.595333	PF44	CF42	266472	PDE4DIP	Myomegalin OS=Homo sapiens OX=9606 GN=PDE4DIP PE=1 SV=3	131.464	135.694	167.547	144.902	2.16107	0.136127	3	1157	178.939	217.751	275.837	224.176	2.35059	0.217542	3	999	1.54709	0.629557	UP
Q6YHU6;Q6YHU6-3;Q6YHU6-2;B5MC89;H7BYZ4;Q6YHU6-5;Q6YHU6-6	6	1	23.4955	0.000265724	3.57557	0.000930454	1.5492	1	PF44	CF42	223029	THADA	Thyroid adenoma-associated protein OS=Homo sapiens OX=9606 GN=THADA PE=1 SV=1	1821.53	1772.96	1769.94	1788.14	3.2524	0.0161906	3	290	2809.62	2588.96	2911.97	2770.18	3.44251	0.0595916	3	195	1.5492	0.63152	UP
Q9NZJ4;Q9NZJ4-2;H0Y6M8	24	3	85.9251	0.0155035	1.80957	0.0130085	1.55043	0.851129	PF44	CF42	526830	SACS	Sacsin OS=Homo sapiens OX=9606 GN=SACS PE=1 SV=2	395.1	484.82	356.332	412.084	2.61499	0.159934	3	756	606.586	590.965	719.167	638.906	2.80544	0.109477	3	609	1.55043	0.632667	UP
P42224;P42224-2;J3KPM9;D2KFR9;E7EPD2;E7ENM1;E9PH66;H7BZB5	16	10	108.341	0.00032261	3.49132	0.00106882	1.55307	1	PF44	CF42	87905.2	STAT1	Signal transducer and activator of transcription 1-alpha/beta OS=Homo sapiens OX=9606 GN=STAT1 PE=1 SV=2	1897.01	1744.86	1954.38	1865.42	3.27078	0.0580424	3	278	2951.35	2943.92	2796.07	2897.12	3.46197	0.0302318	3	190	1.55307	0.63512	UP
Q6UVK1	6	1	21.8916	0.0141589	1.84897	0.01227	1.5876	0.868246	PF44	CF42	251221	CSPG4	Chondroitin sulfate proteoglycan 4 OS=Homo sapiens OX=9606 GN=CSPG4 PE=1 SV=2	227.24	164.944	165.192	185.792	2.26903	0.193201	3	1060	272.223	305.549	307.116	294.962	2.46977	0.066817	3	900	1.5876	0.666844	UP
D6R937;Q12904;Q12904-2	2	1	12.0094	0.0361696	1.44166	0.0232162	1.58878	0.646544	PF44	CF42	16578.1	AIMP1	Aminoacyl tRNA synthase complex-interacting multifunctional protein 1 (Fragment) OS=Homo sapiens OX=9606 GN=AIMP1 PE=1 SV=1	180.087	167.424	124.936	157.482	2.19723	0.183439	3	1124	294.269	248.235	208.113	250.205	2.3983	0.172305	3	952	1.58878	0.667923	UP
P07954;P07954-2	5	2	30.3464	0.00857299	2.06687	0.00864717	1.60585	0.941331	PF44	CF42	54808.2	FH	Fumarate hydratase_ mitochondrial OS=Homo sapiens OX=9606 GN=FH PE=1 SV=3	475.571	504.418	368.823	449.604	2.65283	0.158872	3	736	727.762	684.393	753.83	721.995	2.85853	0.0485814	3	564	1.60585	0.683334	UP
Q04637;E7EUU4;E7EX73;E9PGM1;Q04637-3;Q04637-4;Q04637-5;Q04637-6;Q04637-7;Q04637-8;Q04637-9;C9JF13;C9J6B6;C9J2Z7;C9K073;H7C0V6;H7C044	18	6	96.2664	0.0019679	2.706	0.00354629	1.60994	0.999197	PF44	CF42	176233	EIF4G1	Eukaryotic translation initiation factor 4 gamma 1 OS=Homo sapiens OX=9606 GN=EIF4G1 PE=1 SV=4	474.212	443.378	383.246	433.612	2.6371	0.106692	3	744	728.828	679.743	685.702	698.091	2.84391	0.0383699	3	579	1.60994	0.68701	UP
P11717	14	2	55.8295	0.00472513	2.32559	0.00586481	1.65372	0.984404	PF44	CF42	281332	IGF2R	Cation-independent mannose-6-phosphate receptor OS=Homo sapiens OX=9606 GN=IGF2R PE=1 SV=3	132.323	159.631	164.697	152.217	2.18246	0.1144	3	1138	274.944	226.266	253.962	251.724	2.40092	0.0969956	3	950	1.65372	0.725714	UP
P01891;A0A140T941;A0A140T975;A0A140T9Z6;A0A1W2PQS8;A0A1W2PS39;B0UXQ0;P10314;P16189;P16190;P30459;P30512;Q9GJ45;A0A140T9Z4	9	2	57.7396	0.00208086	2.68176	0.0036284	1.65734	0.998984	PF44	CF42	41194	HLA-A	HLA class I histocompatibility antigen_ A-68 alpha chain OS=Homo sapiens OX=9606 GN=HLA-A PE=1 SV=4	389.872	388.442	388.688	389.001	2.58995	0.00196674	3	777	738.47	595.868	599.783	644.707	2.80936	0.125987	3	601	1.65734	0.728871	UP
O00151	7	4	42.3238	0.000217381	3.66278	0.000817625	1.67034	1	PF44	CF42	36528	PDLIM1	PDZ and LIM domain protein 1 OS=Homo sapiens OX=9606 GN=PDLIM1 PE=1 SV=4	548.286	499.53	557.971	535.262	2.72857	0.0585164	3	671	920.253	903.984	857.964	894.067	2.95137	0.0361353	3	493	1.67034	0.740137	UP
O75962;O75962-2;O75962-4;E7EWP2;O75962-5;F5H228	4	1	14.298	0.0240958	1.61806	0.0173254	1.68208	0.752985	PF44	CF42	349980	TRIO	Triple functional domain protein OS=Homo sapiens OX=9606 GN=TRIO PE=1 SV=2	344.18	303.007	282.375	309.854	2.49116	0.101552	3	876	664.503	441.36	457.733	521.199	2.717	0.238633	3	696	1.68208	0.750244	UP
P43307;C9IZQ1;C9J3L8;C9J5W0;E9PAL7;P43307-2	4	2	17.6145	0.0540518	1.26719	0.0309345	1.7016	0.535242	PF44	CF42	32235.4	SSR1	Translocon-associated protein subunit alpha OS=Homo sapiens OX=9606 GN=SSR1 PE=1 SV=3	32.5951	21.0678	43.1216	32.2615	1.50868	0.341915	3	1455	55.1254	58.3717	51.1918	54.8963	1.73954	0.0654943	3	1374	1.7016	0.766896	UP
A0A0A0MR45;A0A0C4DGB5;B7Z574;E7EQ12;E7EQA0;E7EVY3;E9PCH5;E9PDE4;H0Y9H6;H0YD33;P20810;P20810-10;P20810-2;P20810-3;P20810-4;P20810-5;P20810-6;P20810-7;P20810-8;P20810-9;E7ES10;H0Y7F0;A0A0C4DGD1;D6RAA8;F8W7E0	4	3	23.9959	0.000452505	3.34438	0.00133487	1.70438	1	PF44	CF42	47442.1	CAST	Calpastatin OS=Homo sapiens OX=9606 GN=CAST PE=1 SV=1	340.532	307.457	354.566	334.185	2.52399	0.0723775	3	852	552.411	555.125	601.202	569.579	2.75555	0.0481399	3	656	1.70438	0.769249	UP
A0A1B0GUA8;Q9H1H9;Q9H1H9-2;Q9H1H9-3;Q9H1H9-4;H0Y307;H0Y925;H0Y9Z7;Q6ZUJ8-3	8	1	37.0712	0.00637714	2.19537	0.00728542	1.74165	0.967849	PF44	CF42	208877	KIF13A	Kinesin-like protein KIF13A OS=Homo sapiens OX=9606 GN=KIF13A PE=1 SV=1	111.878	108.423	88.9084	103.07	2.01313	0.120164	3	1251	198.494	153.4	186.64	179.512	2.25409	0.130224	3	1071	1.74165	0.800456	UP
P62306	2	2	13.0899	0.00408954	2.38833	0.00528932	1.76711	0.989494	PF44	CF42	9782.26	SNRPF	Small nuclear ribonucleoprotein F OS=Homo sapiens OX=9606 GN=SNRPF PE=1 SV=1	449.895	574.509	508.416	510.94	2.70837	0.12202	3	690	790.008	977.869	940.782	902.886	2.95563	0.1102	3	487	1.76711	0.821391	UP
P21817;P21817-2;P21817-3	8	2	27.4532	0.0335892	1.4738	0.0222297	1.79585	0.666671	PF44	CF42	570879	RYR1	Ryanodine receptor 1 OS=Homo sapiens OX=9606 GN=RYR1 PE=1 SV=3	49.8837	41.1234	64.6649	51.8906	1.71509	0.229298	3	1402	95.5294	112.108	71.9271	93.188	1.96936	0.216683	3	1266	1.79585	0.84467	UP
Q9BS26	2	1	12.949	4.03511e-06	5.39414	7.55609e-05	1.81297	1	PF44	CF42	47370.5	ERP44	Endoplasmic reticulum resident protein 44 OS=Homo sapiens OX=9606 GN=ERP44 PE=1 SV=1	2033.79	1980.07	1946.32	1986.73	3.29814	0.0222046	3	263	3683.67	3562.32	3559.65	3601.88	3.55653	0.0196684	3	147	1.81297	0.858357	UP
Q7RTR0;Q7RTR0-2	3	1	12.9003	0.00114961	2.93945	0.00239855	1.81671	0.999944	PF44	CF42	115822	NLRP9	NACHT_ LRR and PYD domains-containing protein 9 OS=Homo sapiens OX=9606 GN=NLRP9 PE=1 SV=1	415.365	456.505	416.925	429.598	2.63306	0.0542709	3	746	772.674	697.146	871.551	780.457	2.89235	0.112066	3	539	1.81671	0.861331	UP
Q9NRY4	3	1	6.8868	0.00427909	2.36865	0.00546879	1.84502	0.988067	PF44	CF42	172054	ARHGAP35	Rho GTPase-activating protein 35 OS=Homo sapiens OX=9606 GN=ARHGAP35 PE=1 SV=3	100.604	120.164	108.209	109.659	2.04004	0.0899187	3	1232	178.05	239.429	189.488	202.322	2.30604	0.161327	3	1037	1.84502	0.883634	UP
Q9Y678;H0Y8X7	22	14	136.452	0.000495518	3.30494	0.00141434	1.85097	1	PF44	CF42	99030.1	COPG1	Coatomer subunit gamma-1 OS=Homo sapiens OX=9606 GN=COPG1 PE=1 SV=1	751.963	799.058	804.849	785.29	2.89503	0.0369378	3	526	1308.2	1470.74	1581.7	1453.55	3.16243	0.0946375	3	335	1.85097	0.888279	UP
O95155;O95155-2;O95155-3;O95155-4;K7EP75	7	1	25.5576	0.0163843	1.78557	0.0134669	1.92716	0.840146	PF44	CF42	147554	UBE4B	Ubiquitin conjugation factor E4 B OS=Homo sapiens OX=9606 GN=UBE4B PE=1 SV=1	74.0479	123.016	119.881	105.648	2.02386	0.259462	3	1243	191.177	198.49	221.137	203.601	2.30878	0.0767209	3	1033	1.92716	0.946475	UP
Q3T8J9;Q3T8J9-3;A0A087WUE6;A4PB68;Q3T8J9-2	10	1	44.6276	0.0289828	1.53786	0.0199773	1.92784	0.705951	PF44	CF42	250617	GON4L	GON-4-like protein OS=Homo sapiens OX=9606 GN=GON4L PE=1 SV=1	126.04	66.5229	85.1985	92.5873	1.96655	0.328759	3	1284	149.085	195.178	191.217	178.493	2.25162	0.143115	3	1074	1.92784	0.946985	UP
P07858;E9PHZ5;E9PKQ7;E9PLY3;E9PNL5;E9PQM1;E9PSG5;E9PCB3;E9PJ67;E9PR54;E9PS78;R4GMQ5	13	7	79.0757	1.35225e-05	4.86894	0.000132366	1.93097	1	PF44	CF42	38791.1	CTSB	Cathepsin B OS=Homo sapiens OX=9606 GN=CTSB PE=1 SV=3	3501.67	3218.05	3434.97	3384.9	3.52955	0.0438092	3	165	6548.32	6537.64	6522.49	6536.15	3.81532	0.00198579	3	83	1.93097	0.949329	UP
Q9UBR2	4	2	24.8332	0.0057195	2.24264	0.00667577	1.94325	0.974921	PF44	CF42	34552.3	CTSZ	Cathepsin Z OS=Homo sapiens OX=9606 GN=CTSZ PE=1 SV=1	108.018	93.232	104.083	101.778	2.00765	0.0752404	3	1258	203.21	157.968	232.159	197.779	2.29618	0.189062	3	1048	1.94325	0.958469	UP
Q13576;E7EWC2;F5H7S7;Q13576-2;Q13576-3;E9PDT6;D6R939;D6RDK8;D6RGC6	13	2	58.8664	8.74781e-05	4.0581	0.000489303	1.96486	1	PF44	CF42	181148	IQGAP2	Ras GTPase-activating-like protein IQGAP2 OS=Homo sapiens OX=9606 GN=IQGAP2 PE=1 SV=4	172.821	162.41	151.988	162.406	2.2106	0.0641402	3	1113	307.998	319.416	329.903	319.106	2.50393	0.0343339	3	868	1.96486	0.974426	UP
Q16531;F5GY55;F5GWI0;F5H2L3	10	3	37.3316	0.00232038	2.63444	0.0039038	1.96874	0.998426	PF44	CF42	128223	DDB1	DNA damage-binding protein 1 OS=Homo sapiens OX=9606 GN=DDB1 PE=1 SV=1	116.766	110.426	143.757	123.65	2.09219	0.143145	3	1203	254.877	259.059	216.365	243.434	2.38638	0.0966788	3	963	1.96874	0.97727	UP
P02452;I3L3H7;P02458;P02458-1	24	18	153.551	9.1955e-06	5.03642	0.000104222	2.04253	1	PF44	CF42	139968	COL1A1	Collagen alpha-1(I) chain OS=Homo sapiens OX=9606 GN=COL1A1 PE=1 SV=5	1105.72	1094.17	1047.21	1082.37	3.03437	0.028628	3	429	2237.72	2129.46	2265.11	2210.76	3.34454	0.0324474	3	241	2.04253	1.03035	UP
Q9HCK0	3	1	15.9118	6.91533e-05	4.16019	0.000431651	2.05174	1	PF44	CF42	50922.2	ZBTB26	Zinc finger and BTB domain-containing protein 26 OS=Homo sapiens OX=9606 GN=ZBTB26 PE=1 SV=2	211.606	229.139	235.482	225.409	2.35297	0.0548663	3	992	462.548	440.582	484.313	462.481	2.66509	0.047279	3	734	2.05174	1.03685	UP
A0A0R4J2E8;A8MXP9;P43243;D6REM6;B3KM87;D6R991;P43243-2;H0Y8T4;Q68E03;D6RAM9;D6RAY2;D6RBI2;D6RE02;D6RIA2	11	3	58.902	0.000117014	3.93176	0.000550878	2.12624	1	PF44	CF42	95136.6	MATR3	Matrin-3 OS=Homo sapiens OX=9606 GN=MATR3 PE=1 SV=1	358.747	362.947	333.454	351.716	2.54619	0.0453608	3	823	793.13	763.255	687.111	747.832	2.8738	0.0730995	3	553	2.12624	1.0883	UP
P08473;C9JR96;C9J9X7;C9IYX7;C9JDZ3	8	1	48.5563	2.18168e-05	4.66121	0.000187858	2.1558	1	PF44	CF42	86198.4	MME	Neprilysin OS=Homo sapiens OX=9606 GN=MME PE=1 SV=2	441.715	403.52	410.836	418.69	2.62189	0.0484199	3	751	916.844	868.4	922.588	902.611	2.9555	0.032978	3	488	2.1558	1.10822	UP
O00303;H0YDT6	2	2	13.8851	0.00822776	2.08472	0.00855636	2.17018	0.945706	PF44	CF42	37678	EIF3F	Eukaryotic translation initiation factor 3 subunit F OS=Homo sapiens OX=9606 GN=EIF3F PE=1 SV=1	185.846	110.14	129.04	141.675	2.15129	0.278123	3	1163	310.145	278.392	333.846	307.461	2.48779	0.0904957	3	883	2.17018	1.11781	UP
P25398	10	6	74.504	0.000108025	3.96647	0.000547363	2.17851	1	PF44	CF42	14914.2	RPS12	40S ribosomal protein S12 OS=Homo sapiens OX=9606 GN=RPS12 PE=1 SV=3	673.883	597.153	568.161	613.066	2.78751	0.0891062	3	612	1316.32	1351.28	1339.1	1335.57	3.12567	0.0132877	3	361	2.17851	1.12334	UP
O94906;O94906-2	3	1	15.3706	0.0266148	1.57488	0.0187608	2.18977	0.728002	PF44	CF42	107724	PRPF6	Pre-mRNA-processing factor 6 OS=Homo sapiens OX=9606 GN=PRPF6 PE=1 SV=1	38.929	43.0285	40.7025	40.8866	1.61158	0.0502834	3	1430	106.452	55.8644	106.28	89.5323	1.95198	0.325664	3	1274	2.18977	1.13078	UP
Q5JTV8;J3KN66;Q5JTV8-3;A0A0A0MSK5;H0YDU3;H0Y4R4;H0YD16	6	2	31.8928	0.00474592	2.32368	0.005867	2.3196	0.984223	PF44	CF42	66419.6	TOR1AIP1	Torsin-1A-interacting protein 1 OS=Homo sapiens OX=9606 GN=TOR1AIP1 PE=1 SV=2	151.439	169.756	114.161	145.119	2.16172	0.19523	3	1156	326.685	394.723	288.444	336.618	2.52714	0.159918	3	843	2.3196	1.21388	UP
Q12768;E7EQI7	3	1	10.4461	0.000103983	3.98304	0.000542589	2.37118	1	PF44	CF42	135199	WASHC5	WASH complex subunit 5 OS=Homo sapiens OX=9606 GN=WASHC5 PE=1 SV=1	205.393	196.465	185.713	195.857	2.29194	0.0503127	3	1042	456.942	429.868	506.426	464.412	2.6669	0.0835928	3	731	2.37118	1.24561	UP
Q14207	2	2	6.9142	0.000455809	3.34122	0.00133547	2.46172	1	PF44	CF42	155602	NPAT	Protein NPAT OS=Homo sapiens OX=9606 GN=NPAT PE=1 SV=3	45.8227	56.3506	47.9329	50.0354	1.69928	0.111322	3	1410	121.009	136.579	111.931	123.173	2.09052	0.101202	3	1194	2.46172	1.29967	UP
A0A087WTA8;P08123	13	8	72.842	0.0039049	2.40839	0.00508103	2.50854	0.990805	PF44	CF42	129664	COL1A2	Collagen alpha-2(I) chain OS=Homo sapiens OX=9606 GN=COL1A2 PE=1 SV=1	446.148	268.334	341.721	352.068	2.54663	0.253807	3	822	972.591	870.939	805.995	883.175	2.94605	0.0950767	3	499	2.50854	1.32685	UP
P62714;P67775;P67775-2;E5RFI3;E5RHC1;E5RHP4;E7ESG8;H0YC23;H3BTA2;H3BV22;P60510	4	2	23.7578	0.00271281	2.56658	0.00418779	2.51425	0.997177	PF44	CF42	36145.4	PPP2CB	Serine/threonine-protein phosphatase 2A catalytic subunit beta isoform OS=Homo sapiens OX=9606 GN=PPP2CB PE=1 SV=1	147.705	225.219	148.848	173.924	2.24036	0.255435	3	1086	432.32	461.622	417.924	437.289	2.64077	0.0509253	3	753	2.51425	1.33013	UP
P84103;A0A087X2D0;P84103-2	4	3	12.396	0.00014154	3.84912	0.000586159	2.52904	1	PF44	CF42	19557.7	SRSF3	Serine/arginine-rich splicing factor 3 OS=Homo sapiens OX=9606 GN=SRSF3 PE=1 SV=1	154.923	138.759	127.362	140.348	2.14721	0.0986766	3	1167	359.763	371.851	333.22	354.945	2.55016	0.0556743	3	817	2.52904	1.33859	UP
Q96CX2	3	2	24.0587	1.20708e-05	4.91826	0.000126801	2.54497	1	PF44	CF42	35986	KCTD12	BTB/POZ domain-containing protein KCTD12 OS=Homo sapiens OX=9606 GN=KCTD12 PE=1 SV=1	453.053	480.79	455.769	463.204	2.66577	0.0330102	3	728	1140.95	1249.94	1145.62	1178.84	3.07145	0.052272	3	396	2.54497	1.34765	UP
P40926;P40926-2;G3XAL0	17	15	124.363	2.40633e-06	5.61865	4.9352e-05	2.55531	1	PF44	CF42	35959.6	MDH2	Malate dehydrogenase_ mitochondrial OS=Homo sapiens OX=9606 GN=MDH2 PE=1 SV=3	1878.63	1794.78	1823.54	1832.32	3.263	0.0232519	3	282	4559.36	4861.94	4625.13	4682.14	3.67044	0.0339896	3	116	2.55531	1.3535	UP
P30044;P30044-3;P30044-2;P30044-4	7	3	43.2888	0.0112468	1.94897	0.0104089	2.61195	0.90637	PF44	CF42	22314.6	PRDX5	Peroxiredoxin-5_ mitochondrial OS=Homo sapiens OX=9606 GN=PRDX5 PE=1 SV=4	184.741	347.084	364.727	298.85	2.47545	0.331988	3	894	860.319	759.255	722.173	780.583	2.89242	0.0915977	3	538	2.61195	1.38513	UP
Q9Y281;Q9Y281-3;F8WDN3	6	2	48.8208	2.96121e-07	6.52853	1.06282e-05	2.72699	1	PF44	CF42	18850.7	CFL2	Cofilin-2 OS=Homo sapiens OX=9606 GN=CFL2 PE=1 SV=1	563.572	568.354	551.491	561.139	2.74907	0.0154872	3	651	1542.8	1553.55	1494.32	1530.22	3.18475	0.0206221	3	324	2.72699	1.44731	UP
P21291;E9PS42;E9PND2;E9PP21	9	5	70.9259	5.22873e-05	4.2816	0.000351873	2.80138	1	PF44	CF42	21422.8	CSRP1	Cysteine and glycine-rich protein 1 OS=Homo sapiens OX=9606 GN=CSRP1 PE=1 SV=3	188.266	178.544	212.825	193.212	2.28603	0.0914408	3	1048	520.463	561.108	542.206	541.259	2.73341	0.0375767	3	672	2.80138	1.48614	UP
P19338	17	5	130.022	0.000175034	3.75688	0.000704544	3.05262	1	PF44	CF42	76671.5	NCL	Nucleolin OS=Homo sapiens OX=9606 GN=NCL PE=1 SV=3	272.935	285.579	329.956	296.157	2.47152	0.101116	3	899	855.333	1014.81	842.012	904.052	2.95619	0.106355	3	485	3.05262	1.61005	UP
Q9Y3Z3;A0A2R8YCS7;Q9Y3Z3-4;A0A2R8YD90;Q9Y3Z3-3;A0A2R8Y5D2;A0A2R8YF51	6	1	35.9525	0.000119279	3.92344	0.000550878	3.11695	1	PF44	CF42	72942	SAMHD1	Deoxynucleoside triphosphate triphosphohydrolase SAMHD1 OS=Homo sapiens OX=9606 GN=SAMHD1 PE=1 SV=2	85.3256	70.6673	71.8305	75.9411	1.88048	0.107293	3	1331	224.225	226.374	259.516	236.705	2.37421	0.0835819	3	980	3.11695	1.64014	UP
P49773;D6RC06;D6RD60;D6RE99;D6REP8	2	2	13.0367	0.000497956	3.30281	0.00141434	3.16944	1	PF44	CF42	13916	HINT1	Histidine triad nucleotide-binding protein 1 OS=Homo sapiens OX=9606 GN=HINT1 PE=1 SV=2	228.967	184.853	204.155	205.992	2.31385	0.107354	3	1025	540.368	733.967	684.301	652.879	2.81483	0.154013	3	595	3.16944	1.66423	UP
P07737;K7EJ44;I3L3D5	20	16	132.969	7.51912e-06	5.12383	0.000104222	3.19875	1	PF44	CF42	15225.3	PFN1	Profilin-1 OS=Homo sapiens OX=9606 GN=PFN1 PE=1 SV=2	3657.53	3233.73	3328.63	3406.63	3.53232	0.0652867	3	162	11135.9	10863	10692	10897	4.03731	0.0205477	3	51	3.19875	1.67751	UP
Q7L576;Q7L576-2;Q7L576-3	3	2	12.3823	0.00284378	2.5461	0.0042676	3.29791	0.996665	PF44	CF42	146837	CYFIP1	Cytoplasmic FMR1-interacting protein 1 OS=Homo sapiens OX=9606 GN=CYFIP1 PE=1 SV=1	63.9746	39.2547	68.8816	57.3703	1.75869	0.276786	3	1385	167.263	204.645	195.698	189.202	2.27693	0.103168	3	1061	3.29791	1.72155	UP
Q4G0P3;F8WD03;Q4G0P3-10;Q4G0P3-2;Q4G0P3-5;Q4G0P3-6;Q4G0P3-8;J3QL79;J3QQJ7;H0YF91	25	3	95.9081	0.000442164	3.35442	0.00132248	3.36378	1	PF44	CF42	581311	HYDIN	Hydrocephalus-inducing protein homolog OS=Homo sapiens OX=9606 GN=HYDIN PE=1 SV=3	121.129	85.3356	99.991	102.152	2.00925	0.176153	3	1256	379.026	336.573	315.25	343.617	2.53607	0.0944828	3	836	3.36378	1.75008	UP
Q9Y2X3;H7BZ72	9	3	57.2691	4.93773e-05	4.30647	0.000337564	3.47973	1	PF44	CF42	60091.5	NOP58	Nucleolar protein 58 OS=Homo sapiens OX=9606 GN=NOP58 PE=1 SV=1	36.9054	33.3329	32.4904	34.2429	1.53457	0.0684509	3	1449	116.858	131.515	109.095	119.156	2.07612	0.0955489	3	1204	3.47973	1.79898	UP
P50416;P50416-2;H3BMD2	7	5	34.4283	0.00237203	2.62488	0.00395781	3.97646	0.998286	PF44	CF42	89052.2	CPT1A	Carnitine O-palmitoyltransferase 1_ liver isoform OS=Homo sapiens OX=9606 GN=CPT1A PE=1 SV=2	84.119	170.554	132.247	128.973	2.1105	0.335808	3	1187	501.519	507.69	529.363	512.857	2.71	0.0285145	3	703	3.97646	1.99149	UP
Q92817;K7EKI0	5	1	12.4307	2.99948e-05	4.52295	0.000232413	5.33105	1	PF44	CF42	232916	EVPL	Envoplakin OS=Homo sapiens OX=9606 GN=EVPL PE=1 SV=3	83.5718	63.8013	74.3528	73.9086	1.8687	0.13385	3	1334	396.887	402.915	382.229	394.01	2.59551	0.027002	3	784	5.33105	2.41442	UP
J3KQ32;Q9NTK5;Q9NTK5-3;C9JTK6;Q9NTK5-2;C9JCJ9	7	5	39.1321	7.47841e-06	5.12619	0.000104222	7.28757	1	PF44	CF42	47166.2	OLA1	Obg-like ATPase 1 OS=Homo sapiens OX=9606 GN=OLA1 PE=1 SV=1	388.73	317.756	321.731	342.739	2.53496	0.116354	3	839	2537.46	2430.7	2525.04	2497.73	3.39755	0.0233753	3	220	7.28757	2.86544	UP
P02768;A0A0C4DGB6;B7WNR0;C9JKR2;D6RHD5;H0YA55;P02768-2;A0A087WWT3;P02768-3	6	5	28.2736	4.31043e-06	5.36548	7.73534e-05	8.2083	1	PF44	CF42	71362.7	ALB	Serum albumin OS=Homo sapiens OX=9606 GN=ALB PE=1 SV=2	198.41	205.734	233.509	212.551	2.32746	0.0871146	3	1013	1661.16	1871.89	1700.98	1744.68	3.24172	0.064169	3	302	8.2083	3.03708	UP
P62942;A0A087WTS4;A0A087WV48;A0A087WZM5;Q1JUQ3;Q1JUQ5;Q5W0X3	4	4	16.9705	3.36147e-06	5.47347	6.58077e-05	10.2599	1	PF44	CF42	12007.8	FKBP1A	Peptidyl-prolyl cis-trans isomerase FKBP1A OS=Homo sapiens OX=9606 GN=FKBP1A PE=1 SV=2	319.967	394.226	364.192	359.462	2.55565	0.103919	3	815	3830.29	3593.68	3640.15	3688.04	3.5668	0.0339917	3	143	10.2599	3.35894	UP
P05386	3	1	17.6797	0.0453657	1.34327	0.0271372	19.7982	0.583935	PF44	CF42	11628	RPLP1	60S acidic ribosomal protein P1 OS=Homo sapiens OX=9606 GN=RPLP1 PE=1 SV=1		27.9511	32.8981	30.4246	1.48323	0.114974	2	1463	460.279	412.606	331.818	401.568	2.60376	0.16171	3	780	13.1988	3.72233	UP
P07333	2	1	6.9539	7.27147e-06	5.13838	0.000104222	34.2829	1	PF44	CF42	109181	CSF1R	Macrophage colony-stimulating factor 1 receptor OS=Homo sapiens OX=9606 GN=CSF1R PE=1 SV=2	5.70717	6.3883	8.05783	6.71777	0.827225	0.180041	3	1516	225.961	256.756	208.196	230.304	2.3623	0.106682	3	987	34.2829	5.09942	UP
Q99627;E9PGT6	2	1	8.4025	6.07245e-07	6.21664	1.74358e-05	34.9567	1	PF44	CF42	23282.7	COPS8	COP9 signalosome complex subunit 8 OS=Homo sapiens OX=9606 GN=COPS8 PE=1 SV=1	29.489	34.7671	33.15	32.4687	1.51146	0.0832872	3	1454	1136.48	1213.47	1055.04	1135	3.055	0.0698011	3	407	34.9567	5.1275	UP
O00429;G8JLD5;O00429-2;O00429-3;O00429-4;O00429-5;O00429-6;O00429-8;O00429-7;F8VUJ9;F8W1W3;B4DDQ3;B4DPZ9;F8VR28;F8VYL3;F8VZ52	12	2	59.1462	0.00129015	2.88936	0.00264601	94.5384	0.999894	PF44	CF42	82390.5	DNM1L	Dynamin-1-like protein OS=Homo sapiens OX=9606 GN=DNM1L PE=1 SV=2		2.51229	3.04699	2.77964	0.443989	0.136019	2	1520	174.703	174.524	176.339	175.189	2.24351	0.00570914	3	1079	63.0256	5.97787	UP
