# Supplementary material for: The Proteome Profile of Olfactory Ecto-Mesenchymal Stem Cells-Derived from Patients with Familial Alzheimer’s Disease Reveals New Insights for AD Study
Source: Int J Mol Sci. 2023 Aug 9;24(16):12606. doi: 10.3390/ijms241612606 (PMC10454072; doi:10.3390/ijms241612606)
Supplement: Supplementary file 1 [file ijms-24-12606-s001.zip › Table S6. WEBGESTALT Analysis (P2-C2), GO, pathways and diseases.xlsx]

## Sheet: s1-BP
geneSet	description	size	overlap	expect	enrichmentRatio	pValue	FDR	userId
GO:0065003	protein-containing complex assembly	1836	47	20.3804	2.30614	2.73282e-08	2.4844e-05	SCIN;TICRR;GBP1;DPYSL3;PXN;ITPR3;VPS35;AP2B1;MMP1;ACSL3;EHD3;STMN1;EIF3B;SEC23A;DMD;MARCKS;CAPG;SOD2;MAT2A;NIN;CAV1;PKM;UBB;CLTA;CTTN;HMOX1;SEC31A;VAMP3;EIF4G1;KIF13A;SNRPF;RYR1;CTSZ;IQGAP2;DDB1;COL1A1;EIF3F;PRPF6;COL1A2;KCTD12;SAMHD1;PFN1;CYFIP1;CPT1A;FKBP1A;COPS8;DNM1L
GO:0006928	movement of cell or subcellular component	1967	51	21.8346	2.33575	3.63774e-09	5.75933e-06	MYH10;NTRK2;CPNE3;ITGA2;EPPK1;DPYSL3;PXN;IDH2;RYR2;CACNA1C;MMP1;STMN1;DMD;BSG;SOD2;STARD9;LGALS3;PALLD;ITGB1;TUBB3;TPM1;CD81;DNAH6;KIF27;CAV1;UBB;CTTN;ENG;MYO1B;APEX1;MACF1;UCHL1;CD63;THBS1;MYH4;CFL1;HMOX1;GSTP1;FLNA;STAT1;CSPG4;AIMP1;KIF13A;ARHGAP35;COPG1;COL1A1;COL1A2;PFN1;CYFIP1;HYDIN;CSF1R
GO:0046903	secretion	1605	46	17.8162	2.58192	1.17352e-09	3.55617e-06	SCIN;MYH10;NTRK2;GBP1;CPNE3;RAB7A;IDH2;ITPR3;VPS35;IDH1;CACNA1C;PA2G4;ACSL3;PGM1;A2M;PSAP;COMT;RAB5A;LGALS3;FTL;CAV1;PKM;ENG;CD63;THBS1;ABCA13;CKAP4;PRDX4;HMOX1;GSTP1;FLNA;VAMP3;AIMP1;IGF2R;ERP44;COPG1;CTSB;CTSZ;IQGAP2;MME;CYFIP1;CPT1A;OLA1;ALB;CSF1R;DNM1L
GO:0032940	secretion by cell	1472	43	16.3399	2.6316	2.67704e-09	5.75933e-06	SCIN;MYH10;NTRK2;GBP1;CPNE3;RAB7A;IDH2;ITPR3;VPS35;IDH1;CACNA1C;PA2G4;PGM1;A2M;PSAP;RAB5A;LGALS3;FTL;PKM;ENG;CD63;THBS1;ABCA13;CKAP4;PRDX4;HMOX1;GSTP1;FLNA;VAMP3;AIMP1;IGF2R;ERP44;COPG1;CTSB;CTSZ;IQGAP2;MME;CYFIP1;CPT1A;OLA1;ALB;CSF1R;DNM1L
GO:0016192	vesicle-mediated transport	1942	57	21.5571	2.64415	2.03371e-12	1.84884e-08	SCIN;MYH10;LRP1B;CPNE3;ITGA2;MON2;RAB11FIP4;RAB7A;GOLGA4;VPS35;IDH1;AP2B1;PA2G4;ACSL3;PGM1;ACTR1A;EHD3;SEC23A;A2M;PSAP;HSPA2;RAB5A;LGALS3;ITGB1;CD81;FTL;CAV1;PKM;UBB;CLTA;CTTN;MYO1B;MACF1;CD63;THBS1;LMAN2;ABCA13;CKAP4;PRDX4;HMOX1;SEC31A;GSTP1;FLNA;VAMP3;IGF2R;KIF13A;ERP44;COPG1;CTSB;CTSZ;IQGAP2;MME;WASHC5;CYFIP1;OLA1;ALB;DNM1L
GO:0006887	exocytosis	894	32	9.9238	3.22457	3.80112e-09	5.75933e-06	SCIN;MYH10;CPNE3;RAB7A;IDH1;PA2G4;PGM1;A2M;PSAP;RAB5A;LGALS3;FTL;PKM;CD63;THBS1;ABCA13;CKAP4;PRDX4;HMOX1;GSTP1;FLNA;VAMP3;IGF2R;ERP44;CTSB;CTSZ;IQGAP2;MME;CYFIP1;OLA1;ALB;DNM1L
GO:0030029	actin filament-based process	715	27	7.93682	3.40187	2.451e-08	2.47578e-05	SCIN;MYH10;DPYSL3;PXN;RYR2;CACNA1C;STMN1;DMD;MARCKS;CAPG;PALLD;ITGB1;TPM1;CAV1;CTTN;MYO1B;DBN1;MYH4;CFL1;FLNB;FLNA;ARHGAP35;IQGAP2;CFL2;PFN1;CYFIP1;CSF1R
GO:0097435	supramolecular fiber organization	640	25	7.10428	3.519	4.45048e-08	3.37161e-05	SCIN;MYH10;EPPK1;DPYSL3;PXN;P4HA1;STMN1;MARCKS;CAPG;ITGB1;TPM1;NIN;CTTN;MYO1B;DBN1;CFL1;FLNA;ARHGAP35;IQGAP2;COL1A1;COL1A2;CFL2;PFN1;CYFIP1;FKBP1A
GO:0045055	regulated exocytosis	783	31	8.69165	3.56664	6.22927e-10	2.83152e-06	SCIN;CPNE3;RAB7A;IDH1;PA2G4;PGM1;A2M;PSAP;RAB5A;LGALS3;FTL;PKM;CD63;THBS1;ABCA13;CKAP4;PRDX4;HMOX1;GSTP1;FLNA;VAMP3;IGF2R;ERP44;CTSB;CTSZ;IQGAP2;MME;CYFIP1;OLA1;ALB;DNM1L
GO:0042119	neutrophil activation	494	21	5.48362	3.82959	1.44827e-07	8.28494e-05	CPNE3;RAB7A;IDH1;PA2G4;PGM1;PSAP;LGALS3;FTL;PKM;CD63;ABCA13;CKAP4;PRDX4;GSTP1;IGF2R;ERP44;CTSB;CTSZ;IQGAP2;MME;CYFIP1
GO:0002275	myeloid cell activation involved in immune response	539	23	5.98314	3.84414	3.27853e-08	2.70955e-05	CPNE3;RAB7A;IDH1;PA2G4;PGM1;PSAP;LGALS3;FTL;PKM;CD63;ABCA13;CKAP4;PRDX4;HMOX1;GSTP1;VAMP3;IGF2R;ERP44;CTSB;CTSZ;IQGAP2;MME;CYFIP1
GO:0002283	neutrophil activation involved in immune response	485	21	5.38372	3.90065	1.0645e-07	6.91242e-05	CPNE3;RAB7A;IDH1;PA2G4;PGM1;PSAP;LGALS3;FTL;PKM;CD63;ABCA13;CKAP4;PRDX4;GSTP1;IGF2R;ERP44;CTSB;CTSZ;IQGAP2;MME;CYFIP1
GO:0043299	leukocyte degranulation	529	23	5.87213	3.9168	2.32349e-08	2.47578e-05	CPNE3;RAB7A;IDH1;PA2G4;PGM1;PSAP;LGALS3;FTL;PKM;CD63;ABCA13;CKAP4;PRDX4;HMOX1;GSTP1;VAMP3;IGF2R;ERP44;CTSB;CTSZ;IQGAP2;MME;CYFIP1
GO:0043312	neutrophil degranulation	482	21	5.35041	3.92493	9.5908e-08	6.70692e-05	CPNE3;RAB7A;IDH1;PA2G4;PGM1;PSAP;LGALS3;FTL;PKM;CD63;ABCA13;CKAP4;PRDX4;GSTP1;IGF2R;ERP44;CTSB;CTSZ;IQGAP2;MME;CYFIP1
GO:0002444	myeloid leukocyte mediated immunity	548	24	6.08304	3.94539	9.72819e-09	1.26341e-05	CPNE3;RAB7A;IDH1;PA2G4;PGM1;PSAP;DDX21;LGALS3;FTL;PKM;CD63;ABCA13;CKAP4;PRDX4;HMOX1;GSTP1;VAMP3;IGF2R;ERP44;CTSB;CTSZ;IQGAP2;MME;CYFIP1

## Sheet: s2-CC
geneSet	description	size	overlap	expect	enrichmentRatio	pValue	FDR	userId
GO:0030054	cell junction	1268	35	12.6829	2.75963	3.2172e-08	2.52014e-06	SCIN;CPNE3;ITGA2;EPPK1;CTNND1;PXN;CACNA1C;EHD3;DMD;FHL1;MARCKS;BSG;PALLD;ITGB1;CD81;CAV1;CTTN;ENG;DBN1;CNTNAP1;CFL1;FLNB;FLNA;VAMP3;CSPG4;IGF2R;PDLIM1;MME;KCTD12;CSRP1;PFN1;CYFIP1;EVPL;RPLP1;DNM1L
GO:0099512	supramolecular fiber	914	29	9.14208	3.17215	3.11787e-08	2.52014e-06	EPPK1;DPYSL3;RYR2;CACNA1C;STMN1;DMD;PALLD;TUBB3;TPM1;DNAH6;KIF27;NIN;CTTN;MYO1B;MACF1;NES;MYH4;TPT1;FLNB;FLNA;PDLIM1;KIF13A;RYR1;COL1A1;COL1A2;CFL2;EVPL;FKBP1A;DNM1L
GO:0044433	cytoplasmic vesicle part	1462	47	14.6233	3.21404	3.13305e-13	1.84067e-10	NTRK2;CPNE3;RAB11FIP4;RAB7A;ITPR3;RYR2;VPS35;IDH1;AP2B1;PA2G4;PGM1;EHD3;SEC23A;A2M;PSAP;ITCH;BSG;RAB5A;LGALS3;FTL;CAV1;PKM;UBB;CLTA;MYO1B;CD63;THBS1;ABCA13;CKAP4;PRDX4;SEC31A;GSTP1;ABCA2;VAMP3;IGF2R;KIF13A;RYR1;ERP44;COPG1;CTSB;CTSZ;IQGAP2;MME;CYFIP1;OLA1;ALB;DNM1L
GO:0099503	secretory vesicle	976	34	9.76222	3.48281	1.42377e-10	2.64413e-08	CPNE3;RAB7A;DPYSL3;ITPR3;IDH1;PA2G4;PGM1;A2M;PSAP;BSG;RAB5A;LGALS3;FTL;CAV1;PKM;CLTA;CD63;THBS1;ABCA13;CKAP4;PRDX4;GSTP1;VAMP3;IGF2R;ERP44;CTSB;CTSZ;IQGAP2;COL1A1;MME;CYFIP1;OLA1;ALB;DNM1L
GO:0030141	secretory granule	831	30	8.31189	3.60929	8.86234e-10	1.06024e-07	CPNE3;RAB7A;ITPR3;IDH1;PA2G4;PGM1;A2M;PSAP;BSG;LGALS3;FTL;CAV1;PKM;CD63;THBS1;ABCA13;CKAP4;PRDX4;GSTP1;VAMP3;IGF2R;ERP44;CTSB;CTSZ;IQGAP2;COL1A1;MME;CYFIP1;OLA1;ALB
GO:0048471	perinuclear region of cytoplasm	684	25	6.84155	3.65414	2.0833e-08	1.88298e-06	NTRK2;ITGA2;SRCAP;RAB11FIP4;VPS35;ACSL3;EHD3;SEC23A;ITGB1;CAV1;MYO1B;APEX1;FUS;CKAP4;HMOX1;SEC31A;FLNA;VAMP3;STAT1;IGF2R;CTSB;PRDX5;CYFIP1;COPS8;DNM1L
GO:0099568	cytoplasmic region	479	21	4.79109	4.38314	1.43958e-08	1.40959e-06	SCIN;MYH10;CTNND1;PXN;ACTR1A;ITCH;MARCKS;DNAH6;CAV1;CLTA;CTTN;DBN1;UCHL1;CFL1;FLNB;FLNA;RYR1;CTSZ;NCL;PFN1;HYDIN
GO:0005912	adherens junction	538	25	5.38122	4.64578	1.57523e-10	2.64413e-08	CPNE3;ITGA2;CTNND1;PXN;EHD3;FHL1;MARCKS;BSG;PALLD;ITGB1;CD81;CAV1;CTTN;ENG;CFL1;FLNB;FLNA;CSPG4;IGF2R;PDLIM1;MME;CSRP1;PFN1;CYFIP1;RPLP1
GO:0070161	anchoring junction	554	26	5.54126	4.69207	5.24094e-11	1.23162e-08	CPNE3;ITGA2;CTNND1;PXN;EHD3;FHL1;MARCKS;BSG;PALLD;ITGB1;CD81;CAV1;CTTN;ENG;CFL1;FLNB;FLNA;CSPG4;IGF2R;PDLIM1;MME;CSRP1;PFN1;CYFIP1;EVPL;RPLP1
GO:0015629	actin cytoskeleton	482	23	4.8211	4.7707	5.45424e-10	8.01092e-08	SCIN;MYH10;GBP1;DPYSL3;PXN;PGM1;ACTR1A;MARCKS;CAPG;RAB5A;PALLD;TPM1;CTTN;MYO1B;DBN1;MACF1;MYH4;CFL1;FLNB;FLNA;ARHGAP35;IQGAP2;CFL2
GO:0005924	cell-substrate adherens junction	407	24	4.07093	5.89547	2.72316e-12	7.99927e-10	CPNE3;ITGA2;PXN;EHD3;FHL1;MARCKS;BSG;PALLD;ITGB1;CD81;CAV1;CTTN;ENG;CFL1;FLNB;FLNA;CSPG4;IGF2R;PDLIM1;MME;CSRP1;PFN1;CYFIP1;RPLP1
GO:0005925	focal adhesion	404	24	4.04092	5.93924	2.32658e-12	7.99927e-10	CPNE3;ITGA2;PXN;EHD3;FHL1;MARCKS;BSG;PALLD;ITGB1;CD81;CAV1;CTTN;ENG;CFL1;FLNB;FLNA;CSPG4;IGF2R;PDLIM1;MME;CSRP1;PFN1;CYFIP1;RPLP1
GO:0005938	cell cortex	293	18	2.93067	6.14195	9.02328e-10	1.06024e-07	SCIN;MYH10;CTNND1;PXN;ACTR1A;ITCH;MARCKS;CAV1;CLTA;CTTN;DBN1;CFL1;FLNB;FLNA;RYR1;CTSZ;NCL;PFN1
GO:0030055	cell-substrate junction	411	26	4.11093	6.3246	6.00631e-14	7.05741e-11	CPNE3;ITGA2;EPPK1;PXN;EHD3;DMD;FHL1;MARCKS;BSG;PALLD;ITGB1;CD81;CAV1;CTTN;ENG;CFL1;FLNB;FLNA;CSPG4;IGF2R;PDLIM1;MME;CSRP1;PFN1;CYFIP1;RPLP1
GO:0043209	myelin sheath	158	13	1.58036	8.22598	6.75041e-09	7.21067e-07	ITPR3;PHGDH;ACTR1A;EHD3;HSPA2;ITGB1;PKM;UBB;TUFM;CNTNAP1;UCHL1;MDH2;ALB

## Sheet: s3-MF
geneSet	description	size	overlap	expect	enrichmentRatio	pValue	FDR	userId
GO:0032553	ribonucleotide binding	1865	39	19.913	1.95852	2.72397e-05	0.00332041	MYH10;NTRK2;GBP1;SRCAP;RAB7A;GSPT1;ACSL3;ACTR1A;EHD3;HSPA2;RAB5A;DDX21;UBA6;STARD9;ALDH18A1;MAT2A;TUBB3;DNAH6;KIF27;NIN;PKM;TUFM;MYO1B;HLTF;ABCA13;MYH4;DYRK3;ABCA2;EIF4G1;TRIO;KIF13A;RYR1;NLRP9;ARHGAP35;UBE4B;SAMHD1;OLA1;CSF1R;DNM1L
GO:0032555	purine ribonucleotide binding	1850	39	19.7529	1.9744	2.26773e-05	0.00332041	MYH10;NTRK2;GBP1;SRCAP;RAB7A;GSPT1;ACSL3;ACTR1A;EHD3;HSPA2;RAB5A;DDX21;UBA6;STARD9;ALDH18A1;MAT2A;TUBB3;DNAH6;KIF27;NIN;PKM;TUFM;MYO1B;HLTF;ABCA13;MYH4;DYRK3;ABCA2;EIF4G1;TRIO;KIF13A;RYR1;NLRP9;ARHGAP35;UBE4B;SAMHD1;OLA1;CSF1R;DNM1L
GO:0017076	purine nucleotide binding	1865	40	19.913	2.00874	1.15249e-05	0.00196657	MYH10;NTRK2;GBP1;SRCAP;RAB7A;GSPT1;ACSL3;ACTR1A;EHD3;HSPA2;RAB5A;DDX21;UBA6;STARD9;ALDH18A1;MAT2A;TUBB3;DNAH6;KIF27;NIN;PKM;TUFM;MYO1B;HLTF;ABCA13;MYH4;DYRK3;ABCA2;EIF4G1;TRIO;KIF13A;RYR1;NLRP9;ARHGAP35;UBE4B;SAMHD1;PFN1;OLA1;CSF1R;DNM1L
GO:0035639	purine ribonucleoside triphosphate binding	1786	39	19.0695	2.04515	1.00564e-05	0.00195379	MYH10;NTRK2;GBP1;SRCAP;RAB7A;GSPT1;ACSL3;ACTR1A;EHD3;HSPA2;RAB5A;DDX21;UBA6;STARD9;ALDH18A1;MAT2A;TUBB3;DNAH6;KIF27;NIN;PKM;TUFM;MYO1B;HLTF;ABCA13;MYH4;DYRK3;ABCA2;EIF4G1;TRIO;KIF13A;RYR1;NLRP9;ARHGAP35;UBE4B;SAMHD1;OLA1;CSF1R;DNM1L
GO:0042802	identical protein binding	1696	44	18.1086	2.42979	1.72051e-08	5.38234e-06	NTRK2;GBP1;RAB11FIP4;NQO1;IDH2;RYR2;P4HA1;IDH1;G6PD;PSAP;FASN;MARCKS;SOD2;DDX21;ALDH18A1;MAT2A;TPM1;FTL;CAV1;PKM;ENG;THBS1;FUS;PRDX4;VDAC1;FLNB;HMOX1;MGLL;FLNA;STAT1;AIMP1;EIF4G1;IGF2R;COL1A1;ZBTB26;MATR3;COL1A2;KCTD12;NCL;SAMHD1;CPT1A;ALB;CSF1R;DNM1L
GO:0016817	hydrolase activity, acting on acid anhydrides	893	24	9.53476	2.51711	2.8304e-05	0.00332041	MYH10;GBP1;SRCAP;RAB7A;GSPT1;HSPA2;RAB5A;DDX21;STARD9;TUBB3;ATP5PO;DNAH6;KIF27;TUFM;MYO1B;HLTF;MACF1;ABCA13;MYH4;ABCA2;KIF13A;ARHGAP35;OLA1;DNM1L
GO:0016462	pyrophosphatase activity	891	24	9.51341	2.52276	2.73007e-05	0.00332041	MYH10;GBP1;SRCAP;RAB7A;GSPT1;HSPA2;RAB5A;DDX21;STARD9;TUBB3;ATP5PO;DNAH6;KIF27;TUFM;MYO1B;HLTF;MACF1;ABCA13;MYH4;ABCA2;KIF13A;ARHGAP35;OLA1;DNM1L
GO:0003723	RNA binding	1603	45	17.1156	2.62918	9.54727e-10	5.67228e-07	MYH10;CPNE3;PRRC2C;EPPK1;NQO1;GSPT1;TARBP1;PA2G4;EIF3B;EIF5AL1;FASN;DDX21;CSDE1;ALDH18A1;LGALS3;FAU;PKM;TUFM;APEX1;HLTF;MACF1;MYH4;FUS;CKAP4;TPT1;HNRNPA3;FLNB;FLNA;AIMP1;EIF4G1;CAST;SNRPF;MATR3;EIF3F;RPS12;PRPF6;SRSF3;KCTD12;MDH2;CSRP1;NCL;SAMHD1;PFN1;CYFIP1;NOP58
GO:0017111	nucleoside-triphosphatase activity	840	24	8.96887	2.67592	1.04091e-05	0.00195379	MYH10;GBP1;SRCAP;RAB7A;GSPT1;HSPA2;RAB5A;DDX21;STARD9;TUBB3;ATP5PO;DNAH6;KIF27;TUFM;MYO1B;HLTF;MACF1;ABCA13;MYH4;ABCA2;KIF13A;ARHGAP35;OLA1;DNM1L
GO:0008092	cytoskeletal protein binding	940	33	10.0366	3.28797	1.2088e-09	5.67228e-07	SCIN;MYH10;GBP1;EPPK1;DPYSL3;PXN;CACNA1C;STMN1;DMD;MARCKS;HSPA2;CAPG;STARD9;PALLD;ITGB1;TPM1;KIF27;MYO1B;DBN1;MACF1;MYH4;FUS;CFL1;FLNB;FLNA;KIF13A;IQGAP2;TOR1AIP1;PPP2CB;CFL2;PFN1;CYFIP1;DNM1L
GO:0044877	protein-containing complex binding	1062	40	11.3392	3.52758	1.5774e-12	2.96079e-09	SCIN;MYH10;ITGA2;EPPK1;RPN2;RAB7A;PXN;AP2B1;EIF5AL1;ITCH;MARCKS;CAPG;LGALS3;ITGB1;TPM1;CD81;PKM;CLTA;ENG;MYO1B;APEX1;MACF1;NES;THBS1;MYH4;CFL1;FLNA;SACS;CTSB;IQGAP2;DDB1;PRPF6;CFL2;CYFIP1;NOP58;EVPL;OLA1;FKBP1A;RPLP1;DNM1L
GO:0003779	actin binding	419	20	4.47376	4.47052	2.3276e-08	6.24129e-06	SCIN;MYH10;GBP1;DMD;MARCKS;CAPG;PALLD;ITGB1;TPM1;MYO1B;DBN1;MACF1;MYH4;CFL1;FLNB;FLNA;IQGAP2;CFL2;PFN1;CYFIP1
GO:0050839	cell adhesion molecule binding	478	23	5.10371	4.50652	1.62008e-09	6.0818e-07	ITGA2;CTNND1;PXN;IDH1;FASN;BSG;CAPG;ITGB1;CD81;PKM;CTTN;MYO1B;DBN1;MACF1;THBS1;FLNB;FLNA;STAT1;PDLIM1;CAST;PFN1;EVPL;OLA1
GO:0045296	cadherin binding	315	19	3.36333	5.64917	1.19676e-09	5.67228e-07	CTNND1;IDH1;FASN;BSG;CAPG;ITGB1;PKM;CTTN;MYO1B;DBN1;MACF1;FLNB;FLNA;STAT1;PDLIM1;CAST;PFN1;EVPL;OLA1
GO:0051015	actin filament binding	192	13	2.05003	6.34138	1.46789e-07	3.44404e-05	SCIN;MYH10;MARCKS;CAPG;TPM1;MYO1B;MACF1;MYH4;CFL1;FLNA;IQGAP2;CFL2;CYFIP1

## Sheet: s4-KEGG
geneSet	description	size	overlap	expect	enrichmentRatio	pValue	FDR	userId
hsa05205	Proteoglycans in cancer	201	10	3.31008	3.02107	0.00170003	0.0692761	ITGA2;PXN;ITPR3;ITGB1;CAV1;CTTN;CD63;THBS1;FLNB;FLNA
hsa04510	Focal adhesion	199	10	3.27715	3.05144	0.00157763	0.0692761	ITGA2;PXN;ITGB1;CAV1;THBS1;FLNB;FLNA;ARHGAP35;COL1A1;COL1A2
hsa04810	Regulation of actin cytoskeleton	213	11	3.5077	3.13596	0.000734678	0.0692761	SCIN;MYH10;ITGA2;PXN;ITGB1;CFL1;ARHGAP35;IQGAP2;CFL2;PFN1;CYFIP1
hsa04145	Phagosome	152	8	2.50315	3.19598	0.00349787	0.0967452	ITGA2;RAB7A;RAB5A;ITGB1;TUBB3;THBS1;VAMP3;HLA-A
hsa04141	Protein processing in endoplasmic reticulum	165	9	2.71723	3.3122	0.00154014	0.0692761	RPN2;MOGS;SEC23A;HSPA2;LMAN2;CKAP4;SEC31A;SSR1;UBE4B
hsa04142	Lysosome	123	7	2.02557	3.45581	0.00406186	0.101859	PSAP;CLTA;CD63;ABCA2;IGF2R;CTSB;CTSZ
hsa04144	Endocytosis	244	14	4.01821	3.48414	4.38004e-05	0.0142789	RAB11FIP4;RAB7A;VPS35;AP2B1;EHD3;ITCH;HSPA2;RAB5A;CAV1;UBB;CLTA;IGF2R;HLA-A;WASHC5
hsa05414	Dilated cardiomyopathy (DCM)	90	6	1.48213	4.04824	0.00356117	0.0967452	ITGA2;RYR2;CACNA1C;DMD;ITGB1;TPM1
hsa05100	Bacterial invasion of epithelial cells	74	5	1.21864	4.10294	0.00727306	0.158068	PXN;ITGB1;CAV1;CLTA;CTTN
hsa01200	Carbon metabolism	116	8	1.9103	4.18783	0.000619767	0.0692761	IDH2;PHGDH;IDH1;PGD;G6PD;PKM;FH;MDH2
hsa05412	Arrhythmogenic right ventricular cardiomyopathy	72	5	1.1857	4.21692	0.00648332	0.150969	ITGA2;RYR2;CACNA1C;DMD;ITGB1
hsa05410	Hypertrophic cardiomyopathy (HCM)	83	6	1.36685	4.38966	0.00236965	0.0772505	ITGA2;RYR2;CACNA1C;DMD;ITGB1;TPM1
hsa01230	Biosynthesis of amino acids	75	6	1.23511	4.85789	0.00140643	0.0692761	IDH2;PHGDH;IDH1;ALDH18A1;MAT2A;PKM
hsa00480	Glutathione metabolism	56	5	0.922212	5.42175	0.0021801	0.0772505	IDH2;IDH1;PGD;G6PD;GSTP1
hsa00020	Citrate cycle (TCA cycle)	30	4	0.494042	8.09648	0.00137796	0.0692761	IDH2;IDH1;FH;MDH2

## Sheet: s5-PANTHER
geneSet	description	size	overlap	expect	enrichmentRatio	pValue	FDR	userId
P00016	Cytoskeletal regulation by Rho GTPase	71	7	1.5353	4.55936	0.000660693	0.0746583	MYH10;STMN1;TUBB3;MYH4;CFL1;CFL2;PFN1
P04377	Beta1 adrenergic receptor signaling pathway	43	4	0.929832	4.30185	0.0128187	0.385727	RYR2;CACNA1C;VAMP3;RYR1
P04378	Beta2 adrenergic receptor signaling pathway	43	4	0.929832	4.30185	0.0128187	0.385727	RYR2;CACNA1C;VAMP3;RYR1
P00044	Nicotinic acetylcholine receptor signaling pathway	93	6	2.01103	2.98354	0.0136541	0.385727	MYH10;CACNA1C;ACTR1A;MYO1B;MYH4;VAMP3
P00034	Integrin signalling pathway	166	8	3.58959	2.22867	0.0236746	0.535047	ITGA2;PXN;ITGB1;CAV1;FLNB;FLNA;COL1A1;COL1A2
P05912	Dopamine receptor mediated signaling pathway	51	3	1.10282	2.72029	0.0960352	1	COMT;FLNA;VAMP3
P02776	Serine glycine biosynthesis	5	1	0.10812	9.24898	0.103632	1	PHGDH
P06587	Nicotine pharmacodynamics pathway	28	2	0.605472	3.30321	0.121387	1	CACNA1C;FLNA
P00020	FAS signaling pathway	31	2	0.670344	2.98354	0.143459	1	SCIN;CAPG
P02762	Pentose phosphate pathway	8	1	0.172992	5.78061	0.16068	1	PGD
P00051	TCA cycle	10	1	0.21624	4.62449	0.19672	1	FH
P02772	Pyruvate metabolism	10	1	0.21624	4.62449	0.19672	1	PKM
P02771	Pyrimidine Metabolism	10	1	0.21624	4.62449	0.19672	1	DPYSL3
P00060	Ubiquitin proteasome pathway	44	2	0.951456	2.10204	0.24591	1	ITCH;UBA6
P00038	JAK/STAT signaling pathway	15	1	0.32436	3.08299	0.280319	1	STAT1

## Sheet: s6-REACTOME
geneSet	description	size	overlap	expect	enrichmentRatio	pValue	FDR	userId
R-HSA-168256	Immune System	1997	54	26.8689	2.00976	6.88508e-08	0.000118974	GBP1;CPNE3;PSMB2;RNF6;RAB7A;ITPR3;IDH1;AP2B1;PA2G4;MMP1;PGM1;ACTR1A;SEC23A;PSAP;ITCH;PSMB3;SOD2;ANAPC7;UBA6;LGALS3;ITGB1;TUBB3;CD81;FTL;PKM;UBB;CLTA;CD63;ABCA13;CKAP4;PRDX4;CFL1;FLNB;HMOX1;SEC31A;GSTP1;FLNA;VAMP3;STAT1;EIF4G1;IGF2R;HLA-A;ERP44;CTSB;CTSZ;IQGAP2;COL1A1;MME;COL1A2;PPP2CB;SAMHD1;CYFIP1;FKBP1A;CSF1R
R-HSA-168249	Innate Immune System	1053	29	14.1677	2.04691	0.000133371	0.0165128	CPNE3;PSMB2;RAB7A;ITPR3;IDH1;PA2G4;PGM1;PSAP;ITCH;PSMB3;LGALS3;CD81;FTL;PKM;UBB;CD63;ABCA13;CKAP4;PRDX4;CFL1;GSTP1;IGF2R;ERP44;CTSB;CTSZ;IQGAP2;MME;PPP2CB;CYFIP1
R-HSA-1280218	Adaptive Immune System	756	24	10.1717	2.35949	6.503e-05	0.0123558	PSMB2;RNF6;RAB7A;ITPR3;AP2B1;ACTR1A;SEC23A;ITCH;PSMB3;ANAPC7;UBA6;ITGB1;TUBB3;CD81;UBB;CLTA;SEC31A;VAMP3;HLA-A;CTSB;COL1A1;COL1A2;PPP2CB;FKBP1A
R-HSA-5653656	Vesicle-mediated transport	667	22	8.97423	2.45146	7.80798e-05	0.0123558	RAB7A;GOLGA4;AP2B1;ACTR1A;SEC23A;RAB5A;TUBB3;KIF27;FTL;UBB;CLTA;CTTN;LMAN2;SEC31A;VAMP3;IGF2R;COPG1;CTSZ;COL1A1;COL1A2;ALB;COPS8
R-HSA-109582	Hemostasis	620	23	8.34186	2.75718	8.08866e-06	0.00465907	ITGA2;ITPR3;MMP1;EHD3;A2M;PSAP;BSG;RAB5A;ITGB1;TUBB3;KIF27;CAV1;CD63;THBS1;CFL1;MGLL;FLNA;COL1A1;COL1A2;PPP2CB;PFN1;OLA1;ALB
R-HSA-9006934	Signaling by Receptor Tyrosine Kinases	455	17	6.12185	2.77694	0.000126348	0.0165128	NTRK2;ITGA2;CTNND1;PXN;ITPR3;AP2B1;ITCH;ITGB1;CAV1;UBB;CLTA;THBS1;STAT1;COL1A1;COL1A2;PPP2CB;CYFIP1
R-HSA-422475	Axon guidance	551	21	7.41349	2.83267	1.40155e-05	0.00605471	MYH10;ITGA2;PSMB2;DPYSL3;GSPT1;AP2B1;CACNA1C;SCN10A;PSMB3;ITGB1;TUBB3;UBB;CLTA;CNTNAP1;CFL1;EIF4G1;TRIO;ARHGAP35;RPS12;PFN1;RPLP1
R-HSA-6798695	Neutrophil degranulation	479	21	6.44476	3.25846	1.58199e-06	0.00136684	CPNE3;RAB7A;IDH1;PA2G4;PGM1;PSAP;LGALS3;FTL;PKM;CD63;ABCA13;CKAP4;PRDX4;GSTP1;IGF2R;ERP44;CTSB;CTSZ;IQGAP2;MME;CYFIP1
R-HSA-76002	Platelet activation, signaling and aggregation	262	13	3.52511	3.68783	5.07913e-05	0.0123558	ITPR3;A2M;PSAP;CD63;THBS1;CFL1;MGLL;FLNA;COL1A1;COL1A2;PFN1;OLA1;ALB
R-HSA-2132295	MHC class II antigen presentation	121	8	1.62801	4.91398	0.000220711	0.0254259	RAB7A;AP2B1;ACTR1A;SEC23A;TUBB3;CLTA;SEC31A;CTSB
R-HSA-76005	Response to elevated platelet cytosolic Ca2+	134	9	1.80292	4.99191	7.86536e-05	0.0123558	A2M;PSAP;CD63;THBS1;CFL1;FLNA;PFN1;OLA1;ALB
R-HSA-114608	Platelet degranulation	129	9	1.73565	5.18539	5.84799e-05	0.0123558	A2M;PSAP;CD63;THBS1;CFL1;FLNA;PFN1;OLA1;ALB
R-HSA-3000171	Non-integrin membrane-ECM interactions	59	6	0.793822	7.55837	0.000133785	0.0165128	ITGA2;DMD;ITGB1;THBS1;COL1A1;COL1A2
R-HSA-3000170	Syndecan interactions	27	5	0.363275	13.7637	2.61326e-05	0.00903144	ITGA2;ITGB1;THBS1;COL1A1;COL1A2
R-HSA-75892	Platelet Adhesion to exposed collagen	15	4	0.201819	19.8197	3.82119e-05	0.011005	ITGA2;ITGB1;COL1A1;COL1A2

## Sheet: s7-disease
geneSet	description	size	overlap	expect	enrichmentRatio	pValue	FDR	database	userId
C4025723	Abnormal upper motor neuron morphology	11	4	0.0912928	43.8151	1.44559e-06	0.000593671	disease_Disgenet	GBE1;ALDH18A1;FUS;MATR3
C0022548	Keloid	38	6	0.315375	19.025	6.64192e-07	0.000353848	disease_Disgenet	CAPG;TPM1;FTL;COL1A1;PFN1;ALB
C0016059	Fibrosis	43	6	0.356872	16.8128	1.41721e-06	0.000593671	disease_Disgenet	SOD2;THBS1;HMOX1;COL1A1;COL1A2;ALB
PA444184	Fibrosarcoma	82	8	0.680546	11.7553	4.05185e-07	0.000240827	disease_GLAD4U	ITGA2;MMP1;ITGB1;FUS;AIMP1;COL1A1;MME;COL1A2
C0234958	muscle degeneration	140	10	1.16191	8.60653	2.71342e-07	0.000216836	disease_Disgenet	GBE1;FHL1;ALDH18A1;FUS;FLNA;RYR1;MATR3;HINT1;PFN1;CPT1A
C0270948	Neurogenic Muscular Atrophy	140	10	1.16191	8.60653	2.71342e-07	0.000216836	disease_Disgenet	GBE1;FHL1;ALDH18A1;FUS;FLNA;RYR1;MATR3;HINT1;PFN1;CPT1A
C0541794	Skeletal muscle atrophy	140	10	1.16191	8.60653	2.71342e-07	0.000216836	disease_Disgenet	GBE1;FHL1;ALDH18A1;FUS;FLNA;RYR1;MATR3;HINT1;PFN1;CPT1A
C1843479	Neurogenic muscle atrophy, especially in the lower limbs	140	10	1.16191	8.60653	2.71342e-07	0.000216836	disease_Disgenet	GBE1;FHL1;ALDH18A1;FUS;FLNA;RYR1;MATR3;HINT1;PFN1;CPT1A
C0027626	Neoplasm Invasiveness	143	10	1.18681	8.42597	3.30661e-07	0.00023488	disease_Disgenet	MMP1;DMD;BSG;SOD2;ITGB1;FTL;PKM;CFL1;HMOX1;CTSB
C0027627	Neoplasm Metastasis	184	12	1.52708	7.85814	4.62977e-08	0.000147991	disease_Disgenet	PXN;MMP1;DMD;BSG;SOD2;LGALS3;ITGB1;FTL;CAV1;UCHL3;CFL1;CSF1R
C2239176	Liver carcinoma	244	13	2.02504	6.41963	1.35602e-07	0.000216836	disease_Disgenet	IDH1;PGD;A2M;FASN;COMT;SOD2;PKM;APEX1;UCHL1;GSTP1;STAT1;IGF2R;IQGAP2
C1458155	Mammary Neoplasms	448	17	3.71811	4.57222	2.13232e-07	0.000216836	disease_Disgenet	NQO1;PHGDH;MMP1;STMN1;FASN;COMT;SOD2;TUBB3;CAV1;THBS1;CFL1;HMOX1;GSTP1;FLNA;MME;CPT1A;CSF1R
PA445752	Stress	643	24	5.33648	4.49735	7.66773e-10	4.90198e-06	disease_GLAD4U	MYH10;NQO1;RYR2;G6PD;COMT;HSPA2;SOD2;PALLD;FTL;APEX1;FUS;TPT1;PRDX4;CFL1;HMOX1;GSTP1;FLNA;EIF4G1;ARHGAP35;PRDX5;NCL;OLA1;ALB;DNM1L
C0033578	Prostatic Neoplasms	492	17	4.08328	4.16332	7.86424e-07	0.000386739	disease_Disgenet	CPNE3;RPN2;NQO1;GOLGA4;PHGDH;STMN1;COMT;SOD2;CAV1;APEX1;TPT1;HMOX1;GSTP1;ERP44;CTSB;MME;CSRP1
PA443275	Adhesion	766	22	6.3573	3.46059	4.14375e-07	0.000240827	disease_GLAD4U	ITGA2;CTNND1;PXN;PCDH10;BSG;LGALS3;PALLD;ITGB1;CD81;CAV1;CTTN;ENG;CNTNAP1;CD63;THBS1;CFL1;FLNB;FLNA;CSPG4;TRIO;ARHGAP35;PFN1

## Sheet: s8-GEneanalytics
Score	Disease	#Matched genes (Total Genes)	Genes
			Diferentially Expressed (DE)	Genetic association	GeneCards inferred
21.74	Nervous Systems Disease	31(950)		1 causative mutation: ALDH18A1	31: ALDH18A1, ALB, CAV1, CD63, CFL1, COMT, CSF1R, CTSB, DMD, DNM1L, ENG, FUS, HLA-A, HMOX1, IDH1, IDH2, ITGB1, LGALS3, MME, MMP1, NES, NQO1, NTRK2, RAB5A, RAB7A, SOD2, STAT1, THBS1, UCHL1, VDAC1, VPS35
21.62	Amyotrophic Lateral Sclerosis 1	28 (659)	1 DE in skeletal muscle: FAT4	3 causative mutation: FUS, MATR3, PFN1	27: FUS, MATR3, PFN1, ALB, APEX1, ATP5PD, CSF1R, CTSB, DMD, DNM1L, DPYSL3, HMOX1, HNRNPA3, ITPR3, MDH2, NES, NTRK2, PGM1, PHGDH, RAB5A, RAB7A, SOD2, TUFM, UBB, UCHL1, VDAC1, VPS35
20.86	Alzheimer Disease, Familial, 1	30 (901)	4 DE in blood: CSPG4, DNAH6, TPM1, TRIO	1 causative mutation: CSF1R	26: CSF1R, A2M, ABCA2, ALB, APEX1, CAST, CAV1, COMT, COX5A, CTSB, DBN1, FUS, GSTP1, HMOX1, MARCKS, MME, NCL, NQO1, NTRK2, RAB5A, SOD2, STAT1, STMN1, UBB, UCHL1, VDAC1
18.43	Hereditary Spastic Paraplegia	24(467)	10 DE in skeletal muscle: ACSL3, CFL2, GOLGA4, PDE4DIP, RNF6, DMD, GSPT1, ITGB1, PRRC2C, SEC23A	3 causative mutation: ALDH18A1, SACS, WASHC5	14: ALDH18A1, SACS, WASHC5, CKAP4, CYFIP1, DNM1L, FUS, IGF2R, ITPR3, MATR3, RAB5A, RAB7A, VDAC1, VPS35
17.56	Dilated Cardiomyopathy	22 (454)		2 causative mutation: DMD, TPM1	22: DMD, TPM1, ALB, BSG, CACNA1C, CAV1, CFL2, COL1A1, COL1A2, COPS8, DNM1L, FHL1, LGALS3, MME, MMP1, MYH10, MYH4, RYR1, RYR2, SCN10A, SOD2, VDAC1
13.41	Peripheral Nervous System Disease	16 (408)		2 causative mutation: HINT1, MME	16: HINT1, MME, ALB, CNTNAP1, DMD, DNM1L, FUS, HMOX1, NES, NTRK2, RAB7A, RYR1, SACS, SCN10A, UCHL1, VDAC1
12.62	Myopathy	15 (413)		2 causative mutation: DMD, RYR1	15: DMD, RYR1, ALB, CFL2, CNBP, COX5A, CPT1A, FHL1, FUS, GBE1, HLA-B, MATR3, MYH4, RYR2, TOR1AIP1
12.38	Autism	16 (498)		1 causative mutation: DMD	16: DMD, CACNA1C, CFL1, COMT, CYFIP1, FUS, GSTP1, HLA-B, KDM5C, MYH10, NTRK2, PDE4DIP, RYR2, SOD2, SRCAP, TRIO
11.84	Parkinson Disease, Late-Onset	15 (447)		1 causative mutation: PSAP	15: PSAP, ALB, COMT, EIF4G1, HMOX1, IGF2R, NQO1, NTRK2, RAB5A, RAB7A, SOD2, UCHL1, VDAC1, VPS35, WASHC5
11.36	Congenital Nervous System Abnormality	15 (588)		1 causative mutation: ALDH18A1	15: ALDH18A1, ALB, CFL1, CYFIP1, FAT4, FLNA, FLNB, HYDIN, NES, NIN, PCDH10, PHGDH, RAB5A, RAB7A, SAMHD1
10.46	Myeloma, Multiple	9 (262)		5 causative mutation: IDH1, IDH2, KDM5C, MGA, SAMHD1	8: IDH1, IDH2, KDM5C, SAMHD1, HLA-B, ITGB1, NTRK2, STAT1
9.09	Charcoot-Marie-Tooth Disease	11 (273)		1 genetic test: CNTNAP1	11: CNTNAP1, DNM1L, FUS, GSTP1, HINT1, ITPR3, MME, RAB5A, RAB5A, SACS, YARS1
9.08	Autism spectrum disorder	12 (375)			12: CACNA1C, COMT, FUS, GBE1, GSTP1, KDM5C, MYH10, NTRK2, PRDX5, SOD2, SRCAP, TRIO
9	Frontotemporal dementia	9(171)		2 causative mutation: CSF1R, FUS	9: CSF1R, FUS, ALB, ARHGAP35, CNBP, COMT, MATR3, PFN1, WASHC5
8.48	Schizophrenia	9(523)		3 causative mutation: ABCA13, COMT, DMD	9: ABCA13, COMT, DMD, ALB, CACNA1C, CYFIP1, HINT1, NQO1, NTRK2
8.33	Charcoot-Marie-Tooth Disease, Axonal, type2e	9(128)		1 genetic test: MME	9: MME, CFL2, CNTNAP1, FUS, HINT1, MATR3, PFN1, RAB7A, YARS1
8.32	Myotonic Dystrophy 1	12 (323)	10 DE in skeletal muscle: PDE4DIP, SOD2, THBS1, COL1A1, COL1A2, DMD, GOLGA4, KIF13A, MACF1, MYH4		3: CNBP, DMD, RYR1
8.25	Distal Arthrogryposis	7(132)		3 causative mutation: CNTNAP1, GBE1, RYR1	7: CNTNAP1, GBE1, RYR1, COL1A1, COL1A2, DMD, MYH4
8.24	Myotonic Dystrophy 2	12(349)	10 DE in skeletal muscle: SOD2, THBS1, LRP1B, PDE4DIP, COL1A1, COL1A2, HSPA2, MACF1, MYH4, SACS	1 causative mutation: CNBP	2: CNBP, RYR1
8.17	Neuromuscular disease	9 (199)		1 causative mutation: RYR1	9:RYR1, ALB, CNBP, CNTNAP1, DMD, DNML1, FUS, RAB7A, YARS
